# Supplementary material for: Examination of the Complex Molecular Landscape in Obesity and Type 2 Diabetes
Source: MDPI journal article supplement (doi:10.3390/ijms25094781), 2024-04-27

# Grp\_DiabBMICtrl

Grp\_DiabBMICtrl Control Obese DNorm DObes

Kruskal-Wallis, p = 0.0095

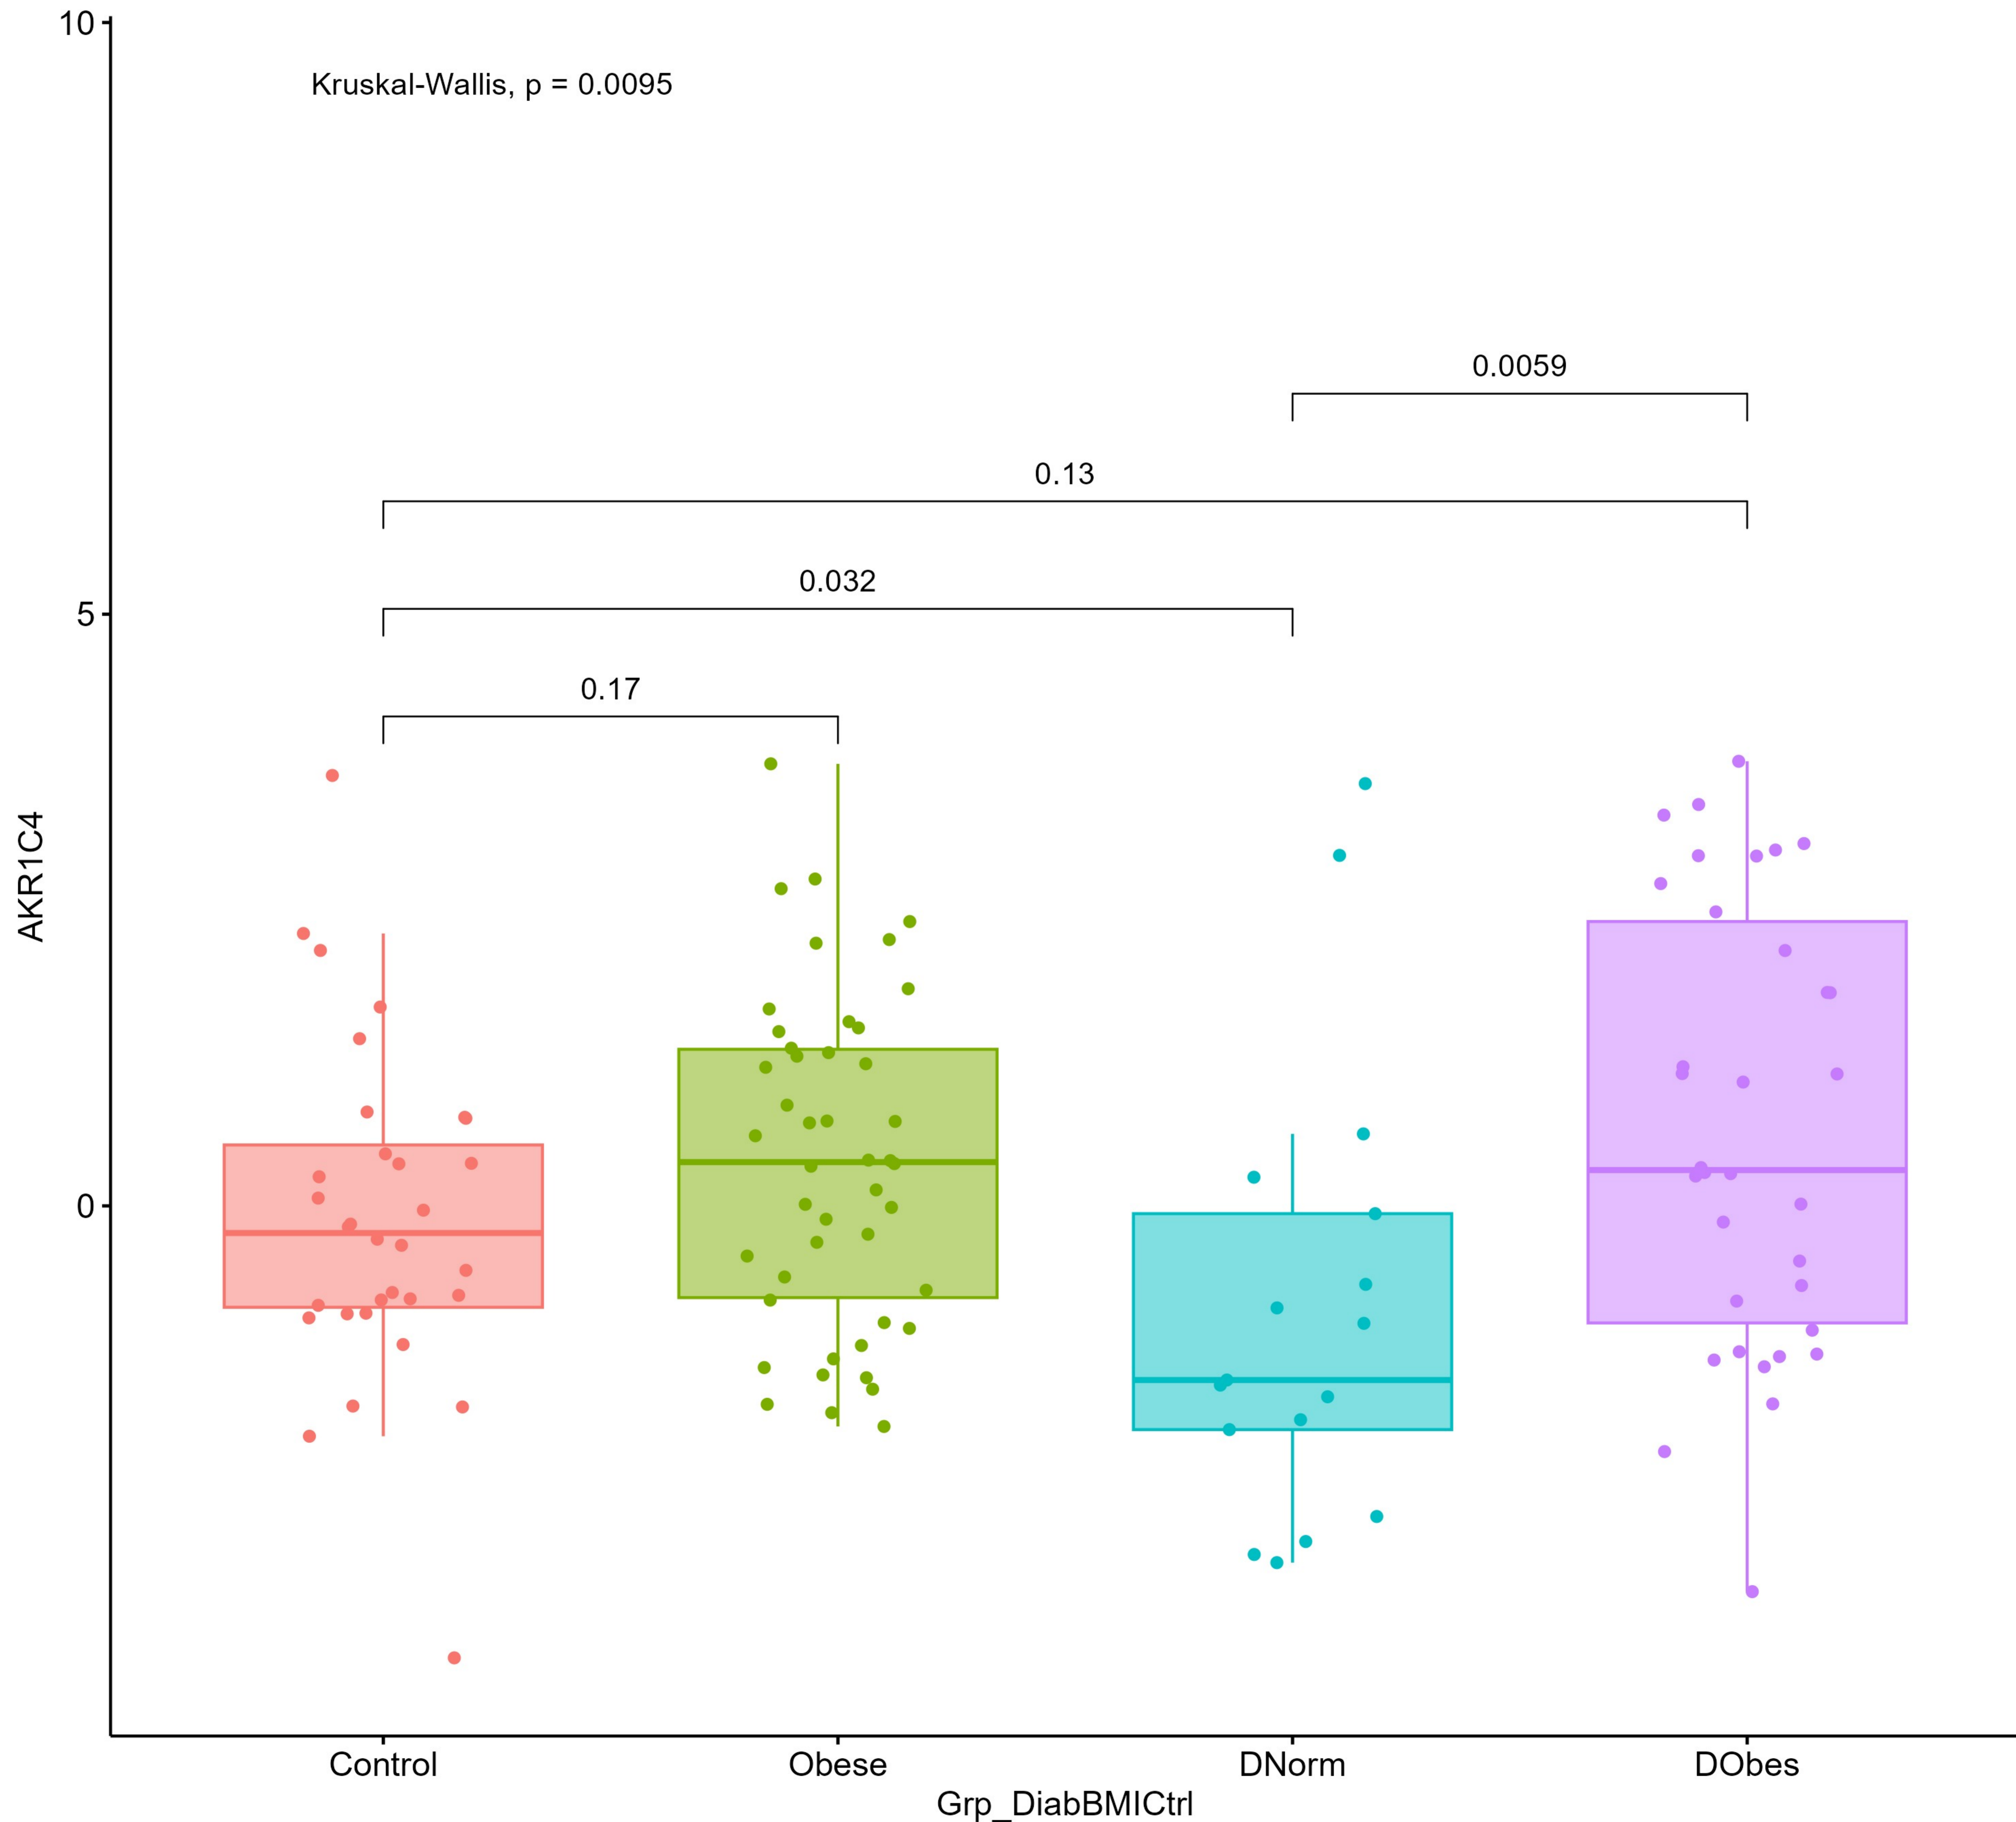

# Grp\_DiabBMICtrl

Grp\_DiabBMICtrl Control Obese DNorm DObes

Kruskal-Wallis,  $p = 0.0076$

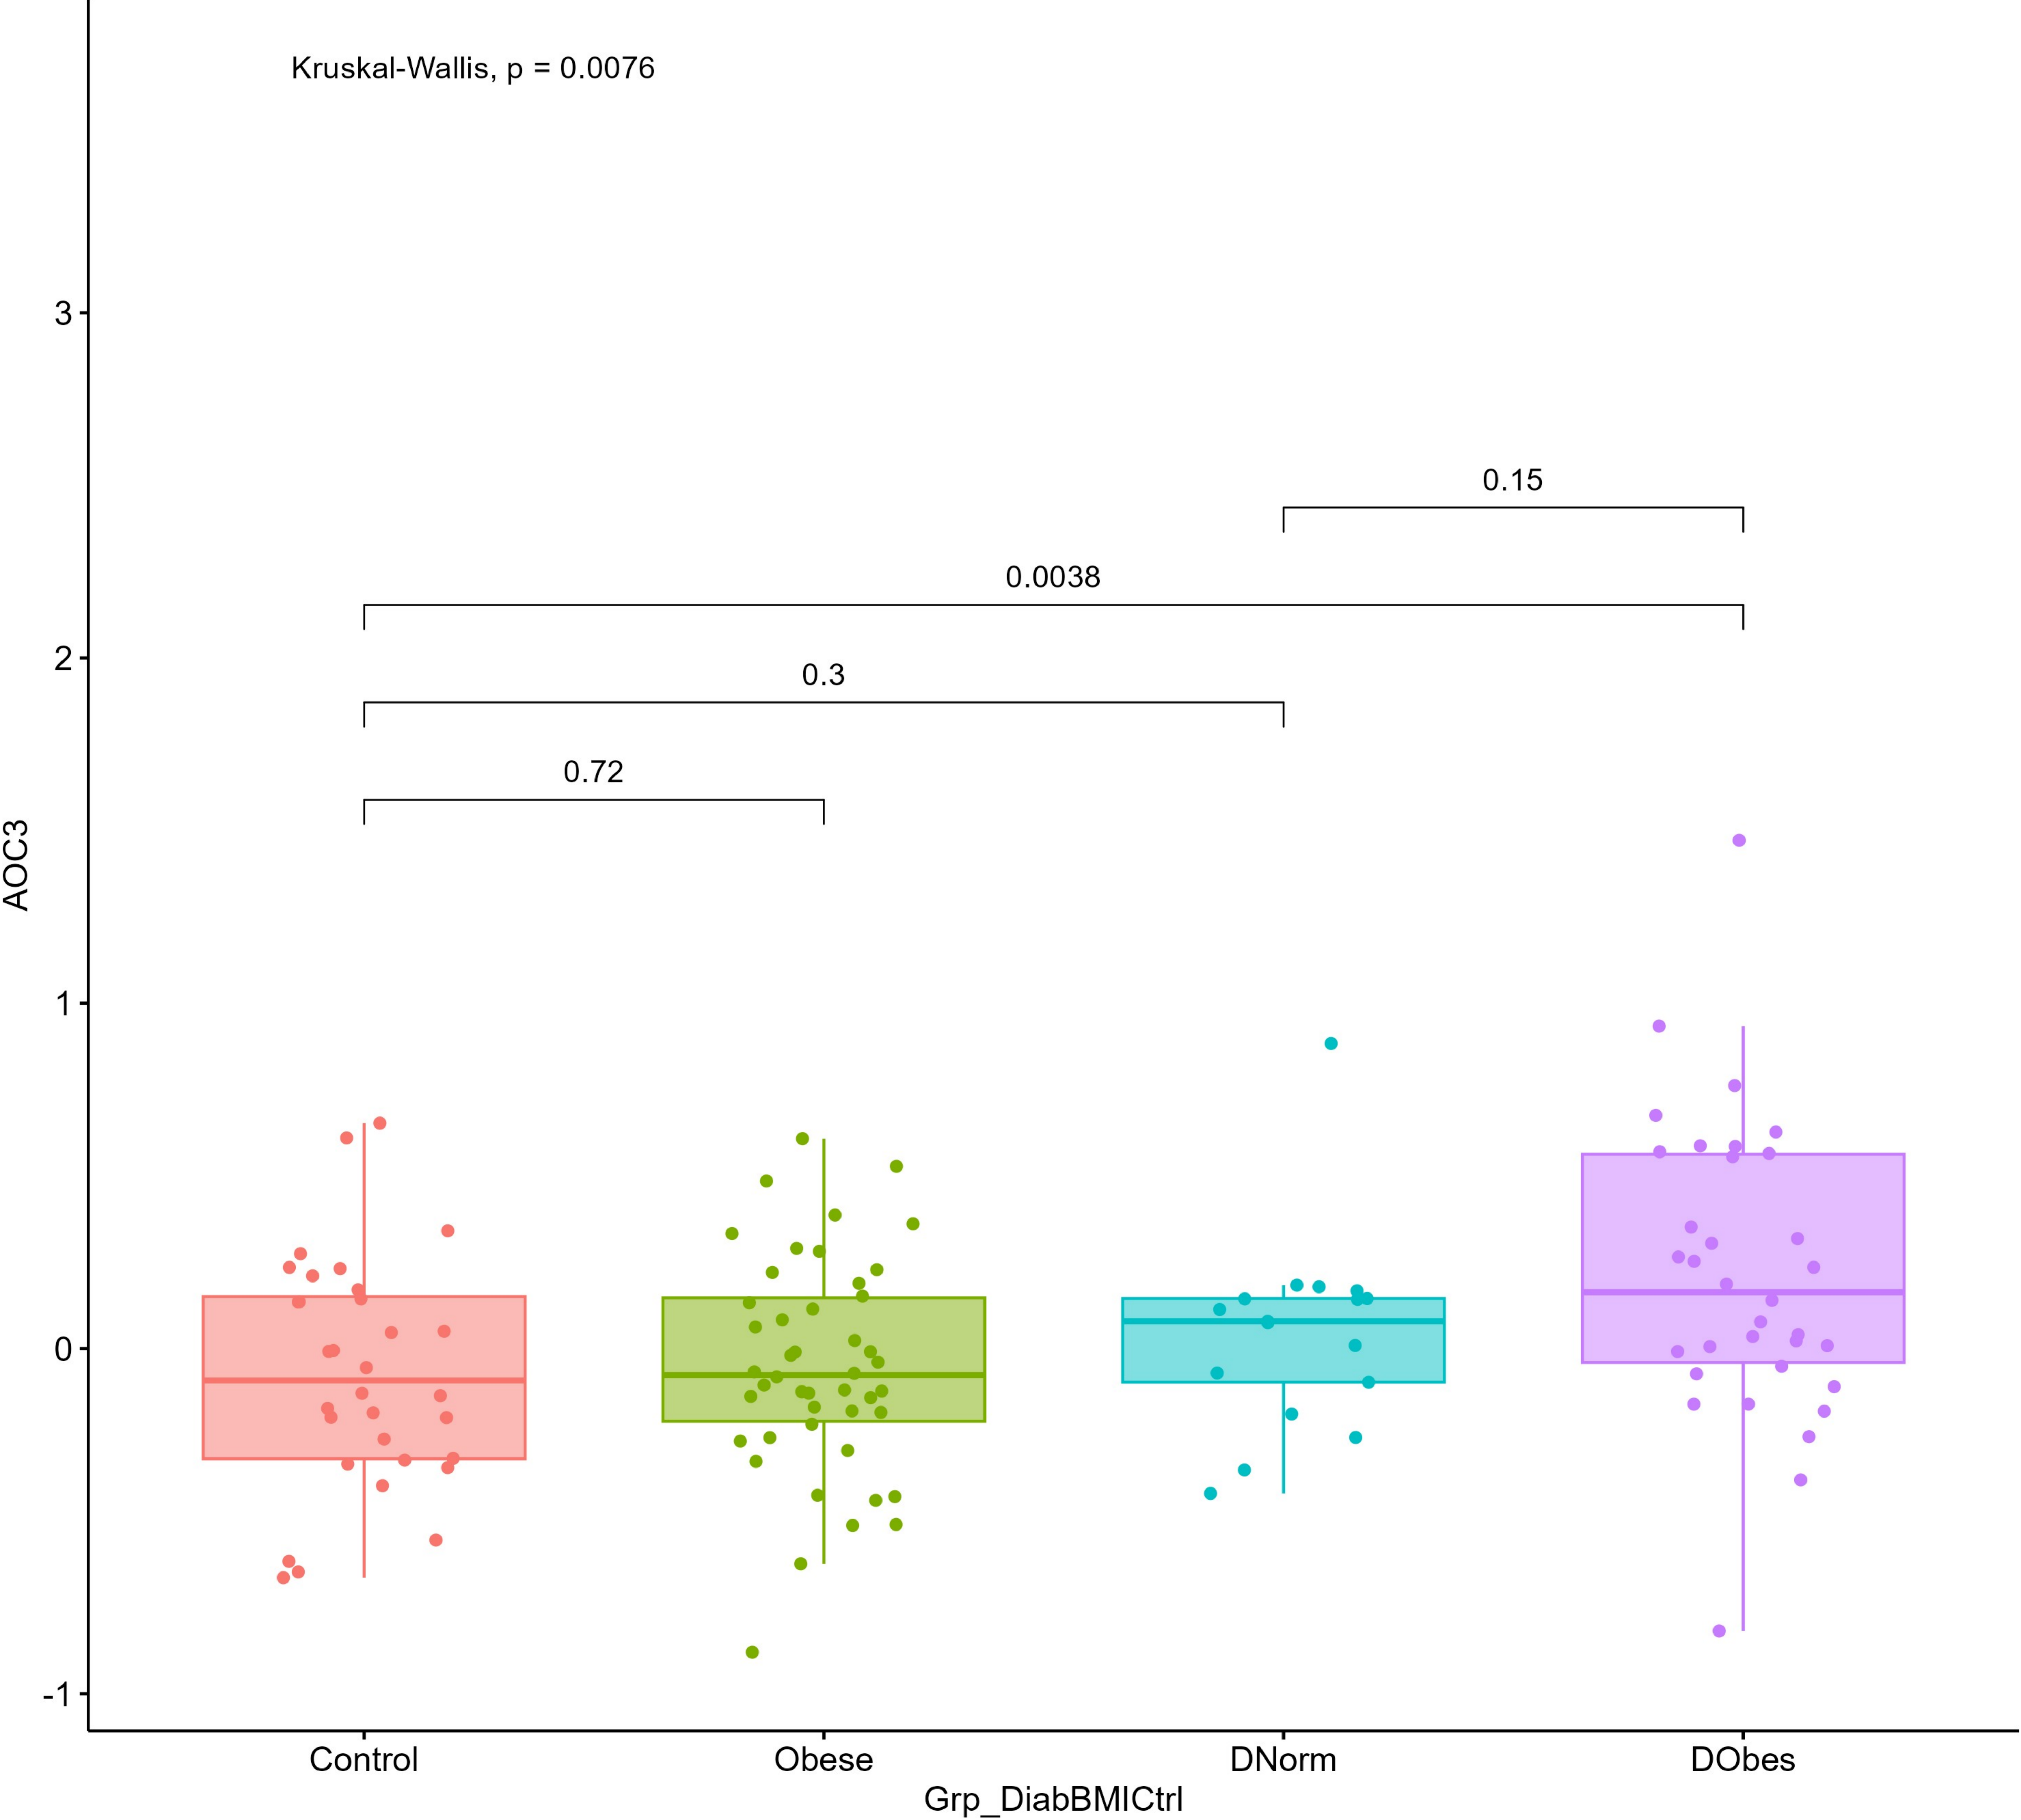

# Grp\_DiabBMICtrl

Grp\_DiabBMICtrl Control Obese DNorm DObes

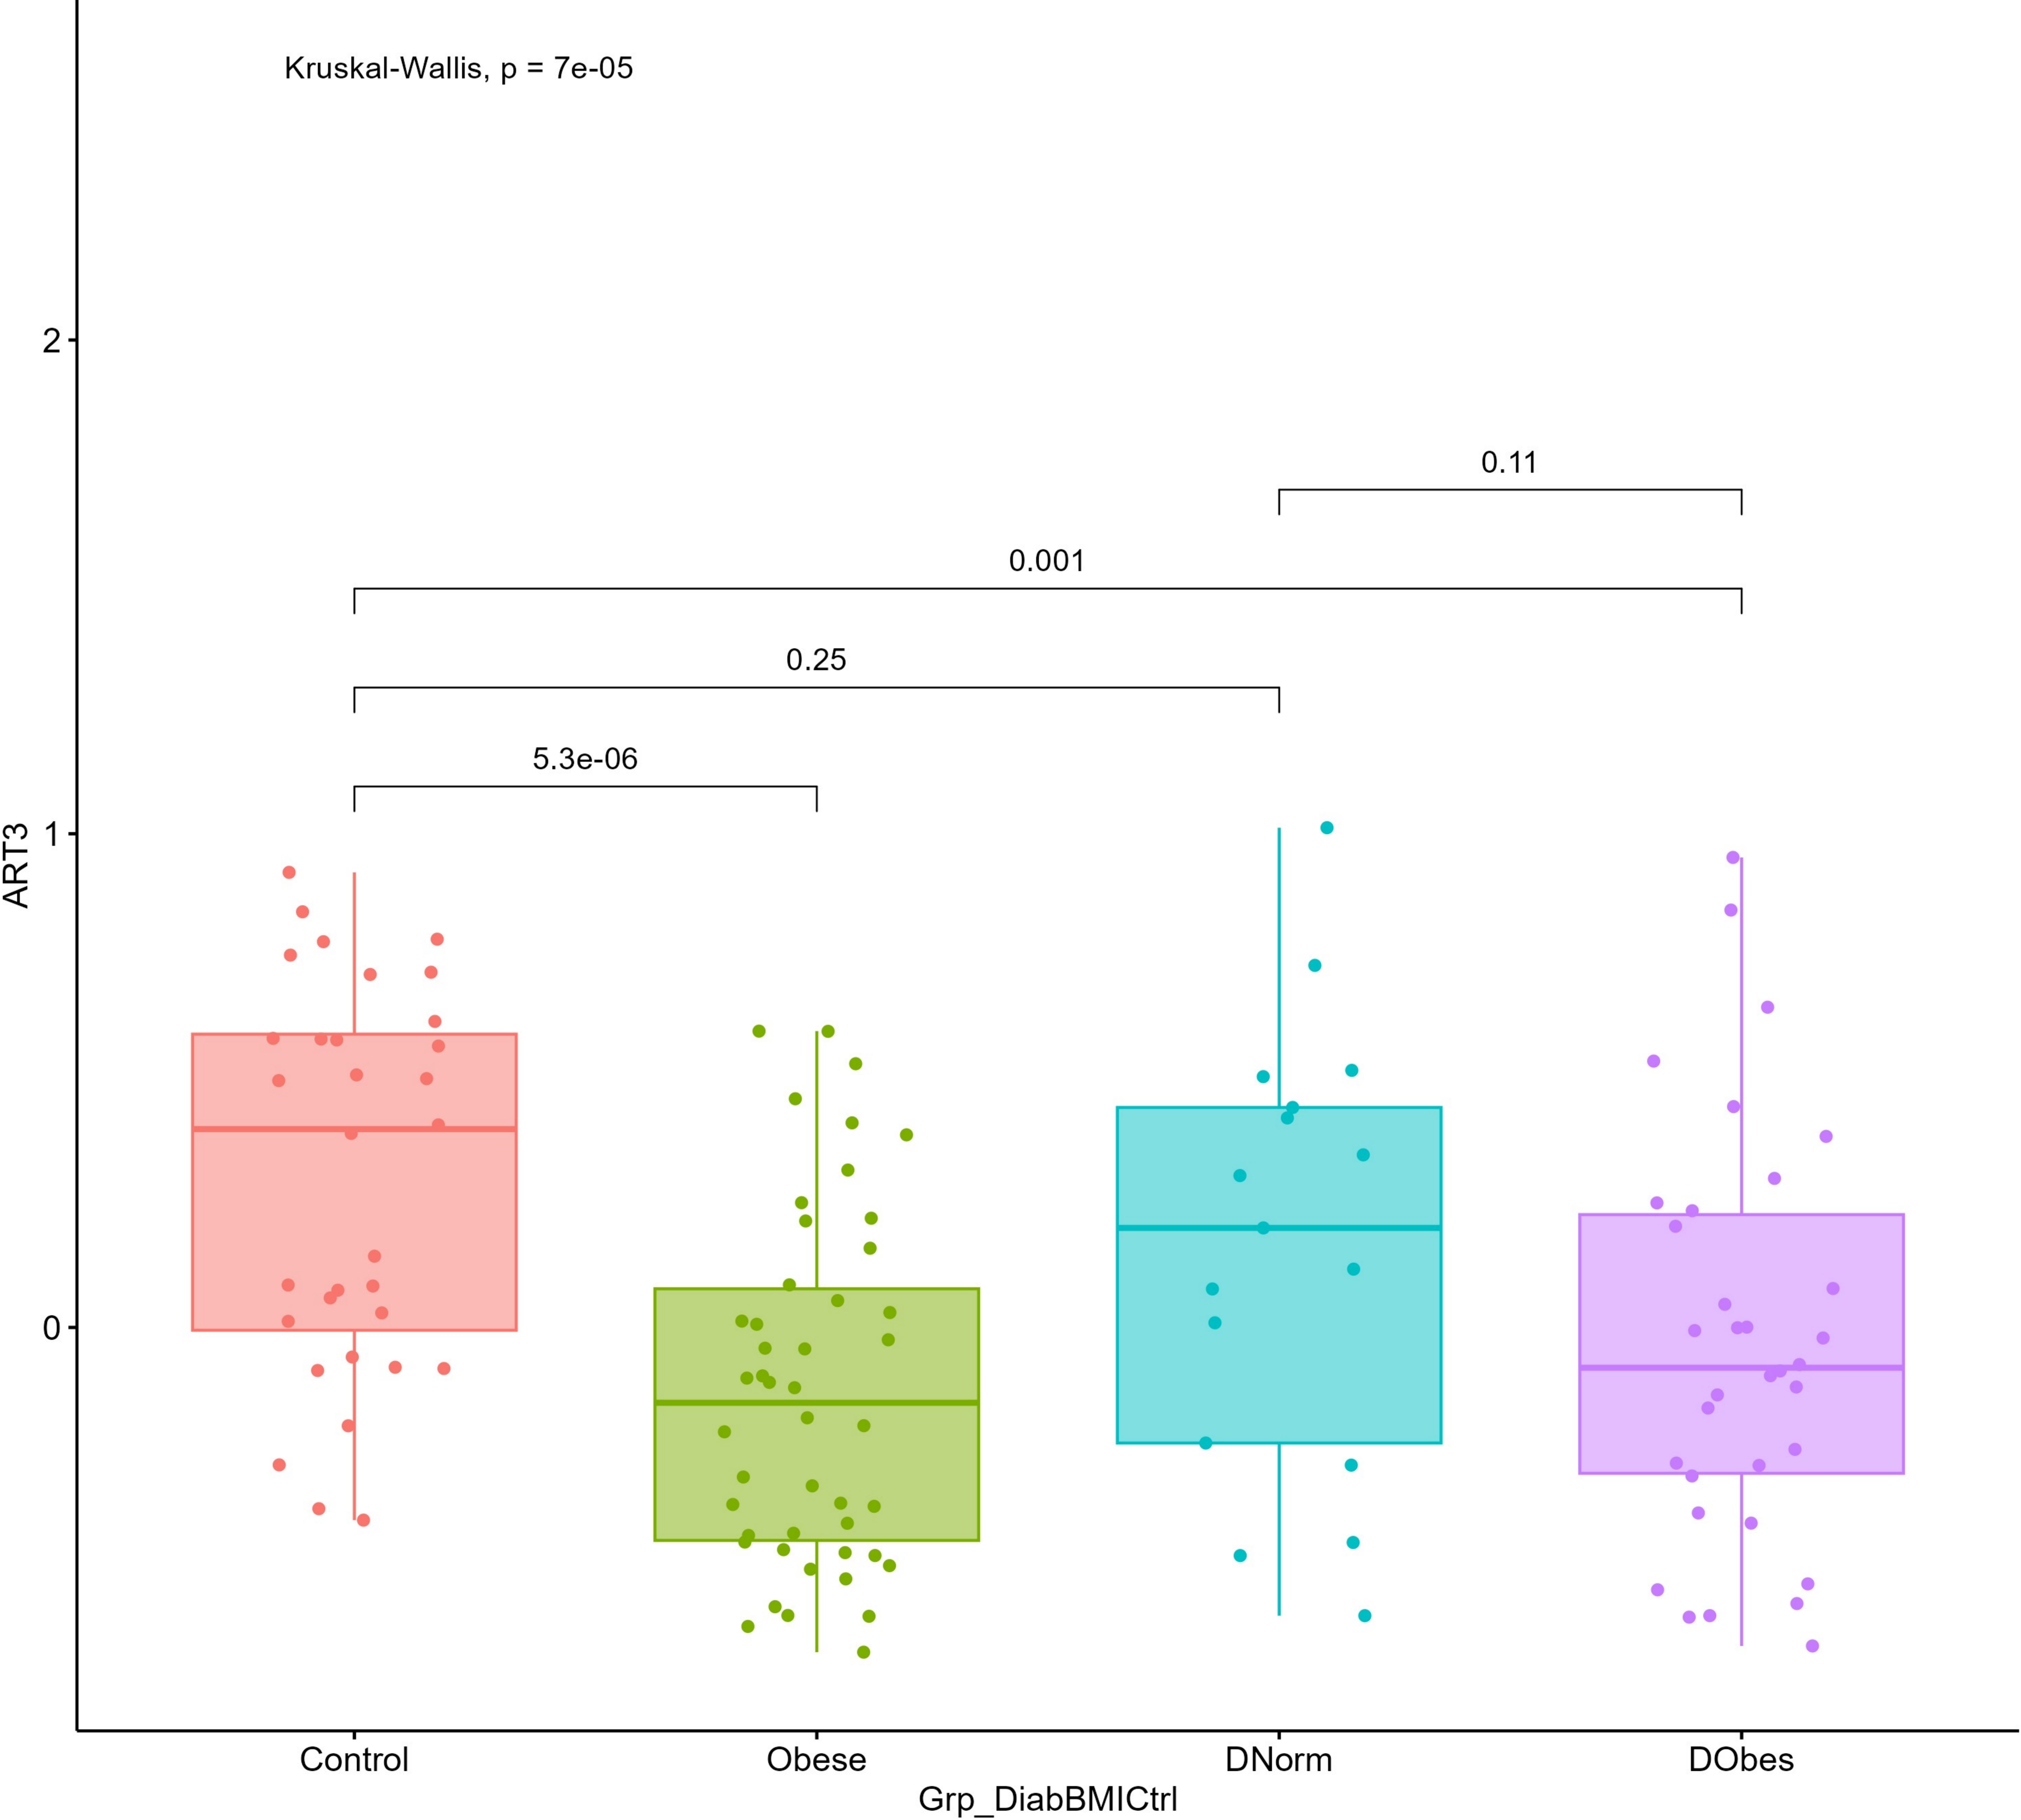

# Grp\_DiabBMICtrl

Grp\_DiabBMICtrl Control Obese DNorm DObes

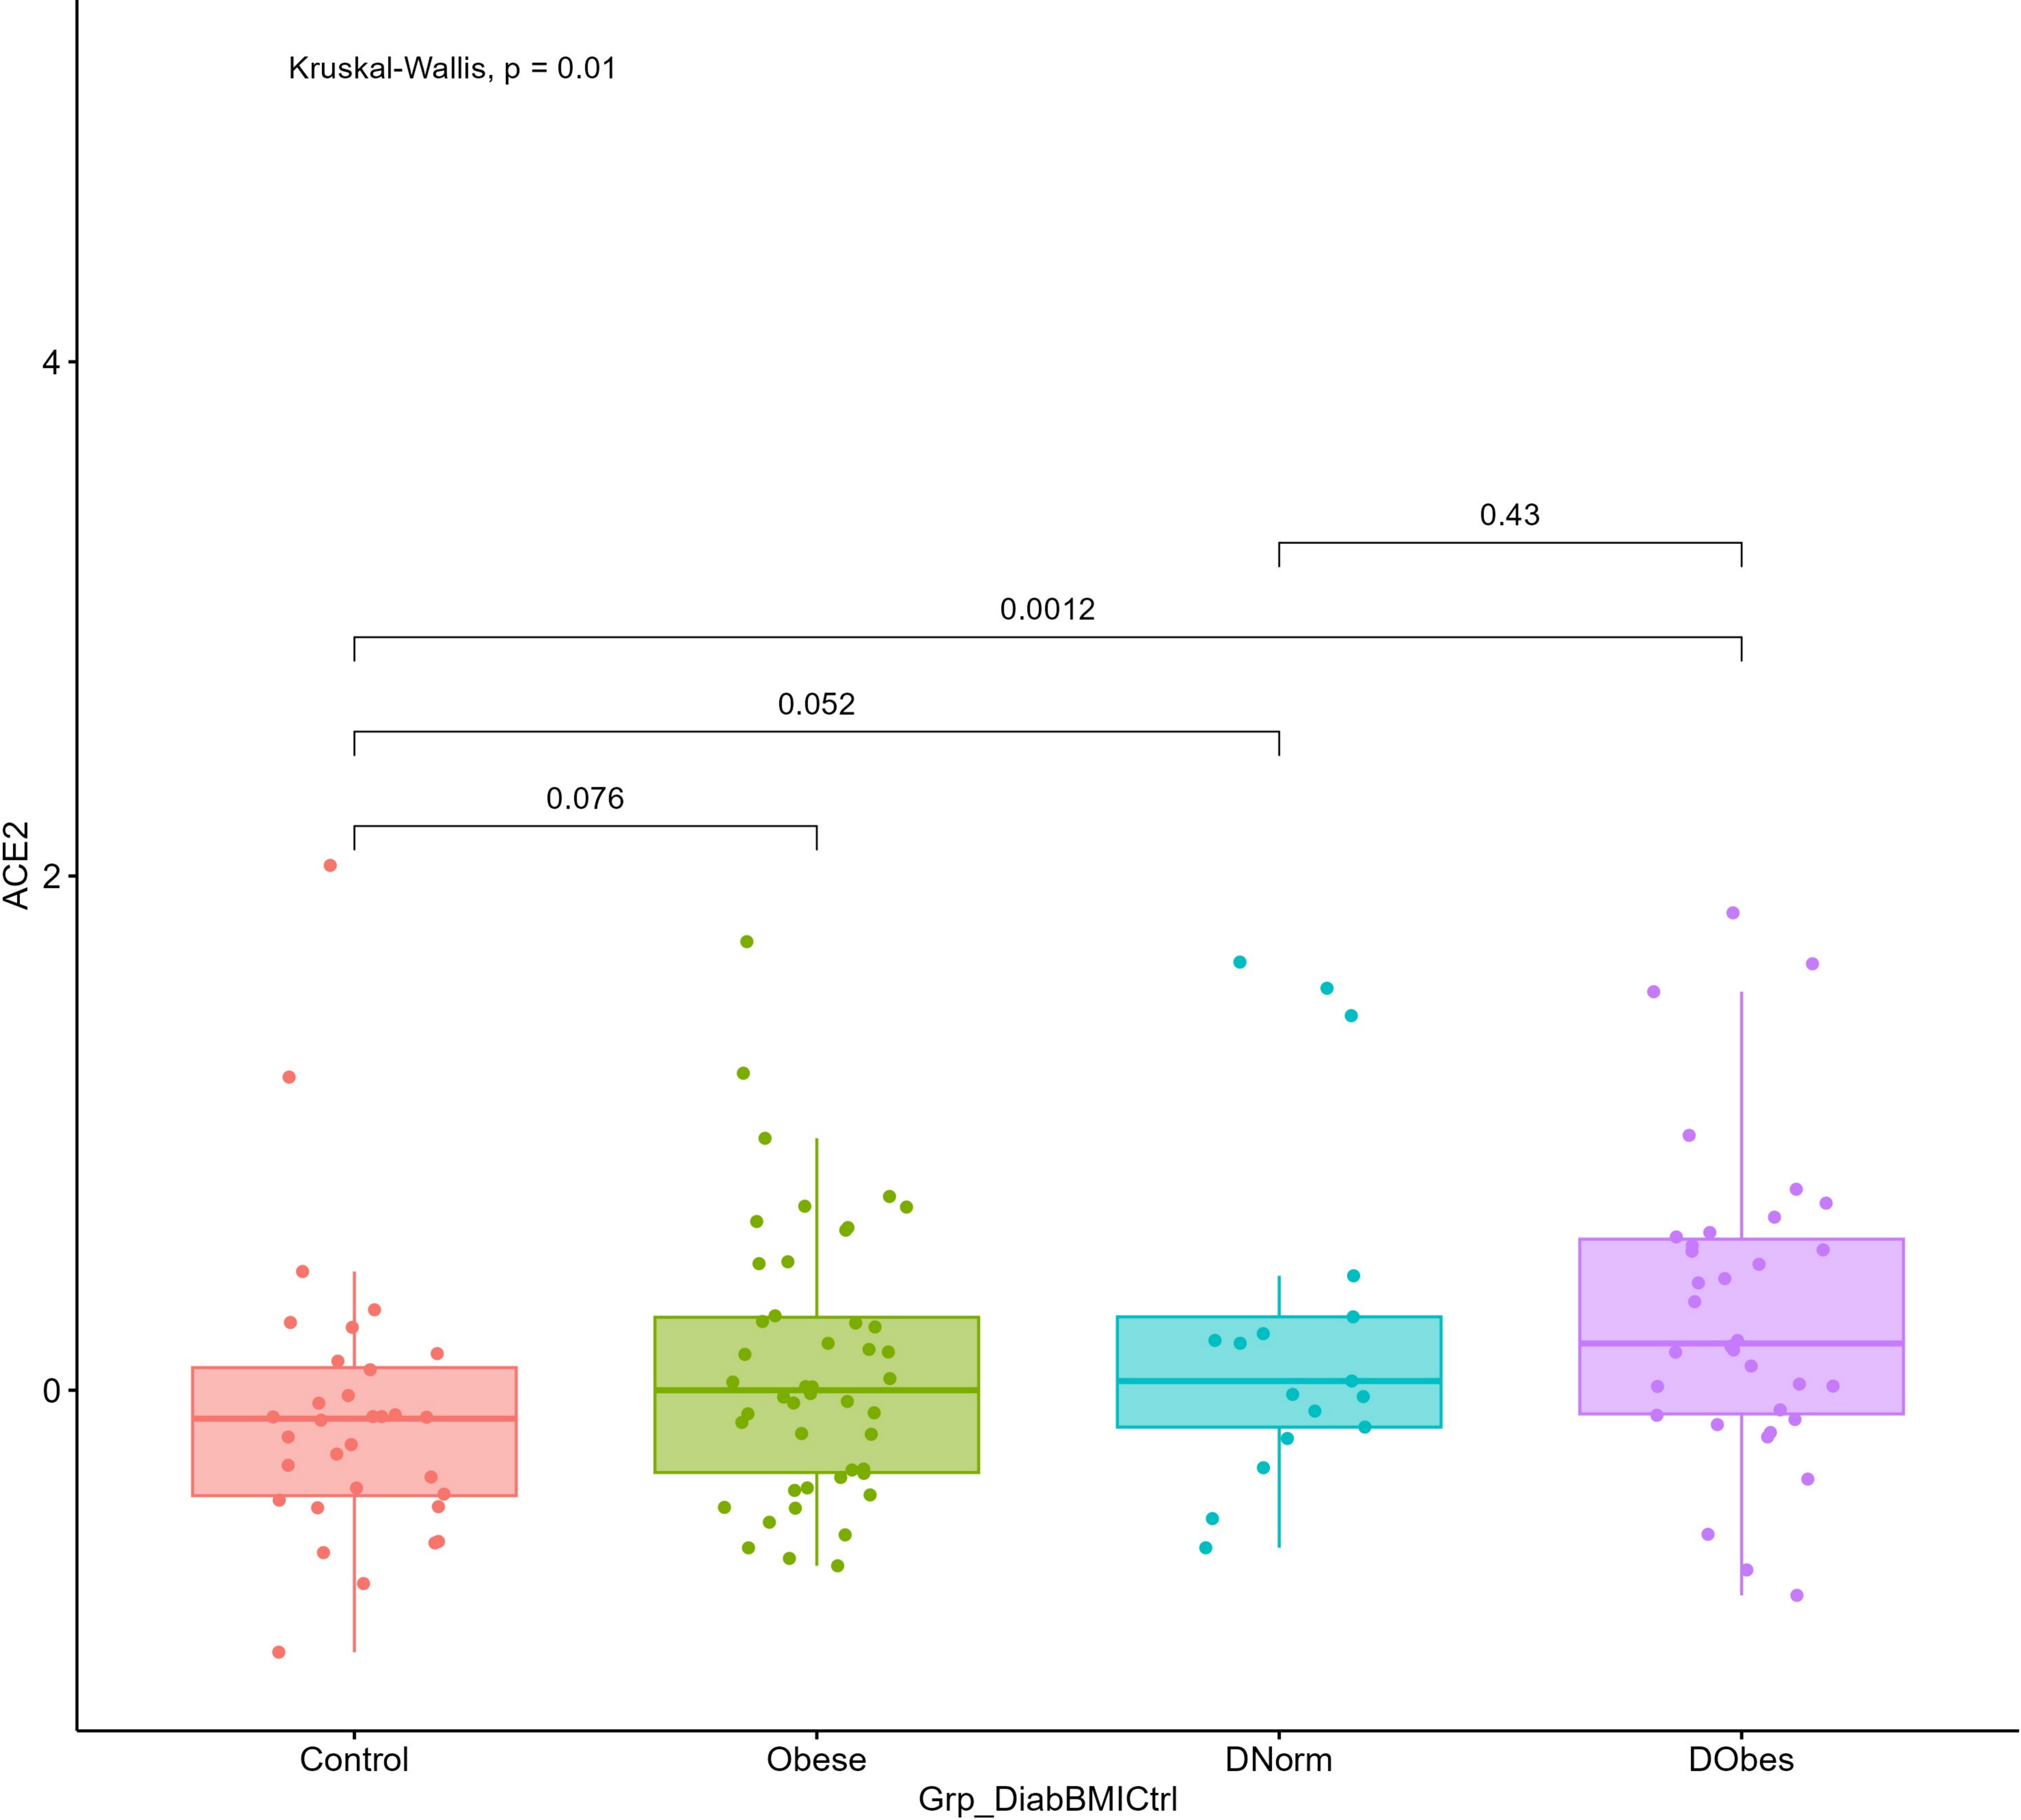

# Grp\_DiabBMICtrl

Grp\_DiabBMICtrl Control Obese DNorm DObes

Kruskal-Wallis,  $p = 0.0086$

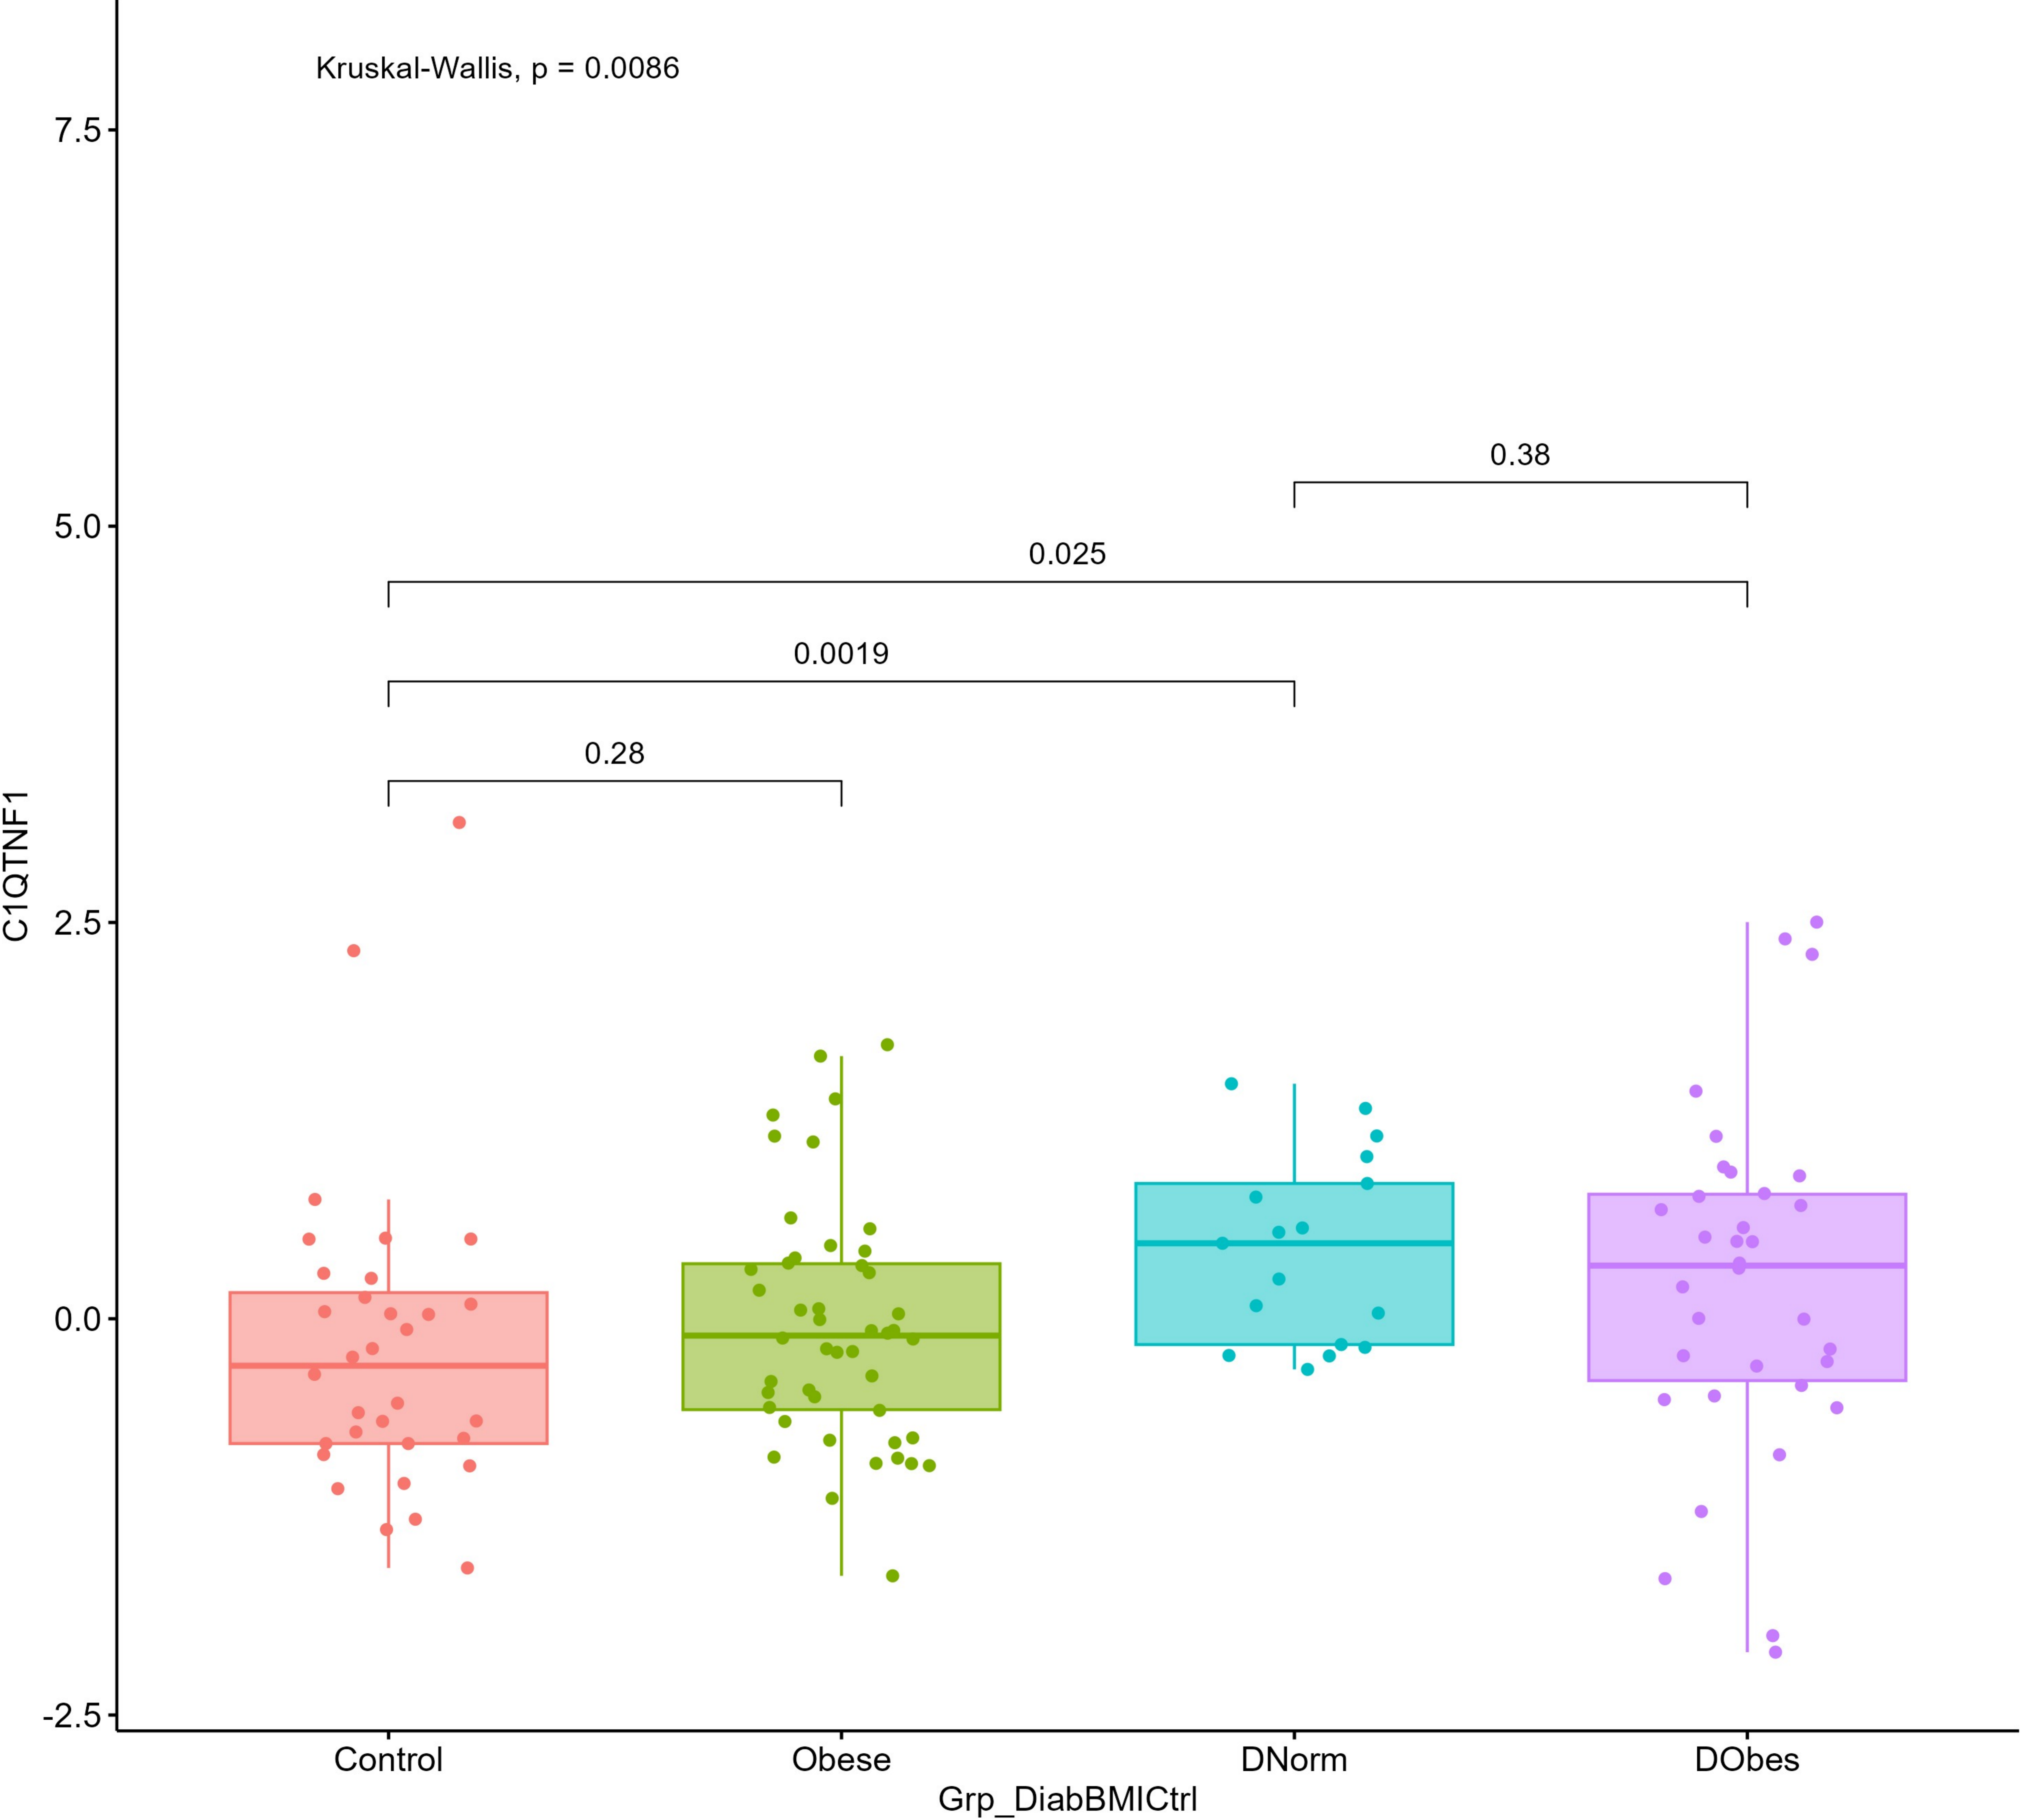

# Grp\_DiabBMICtrl

Grp\_DiabBMICtrl Control Obese DNorm DObes

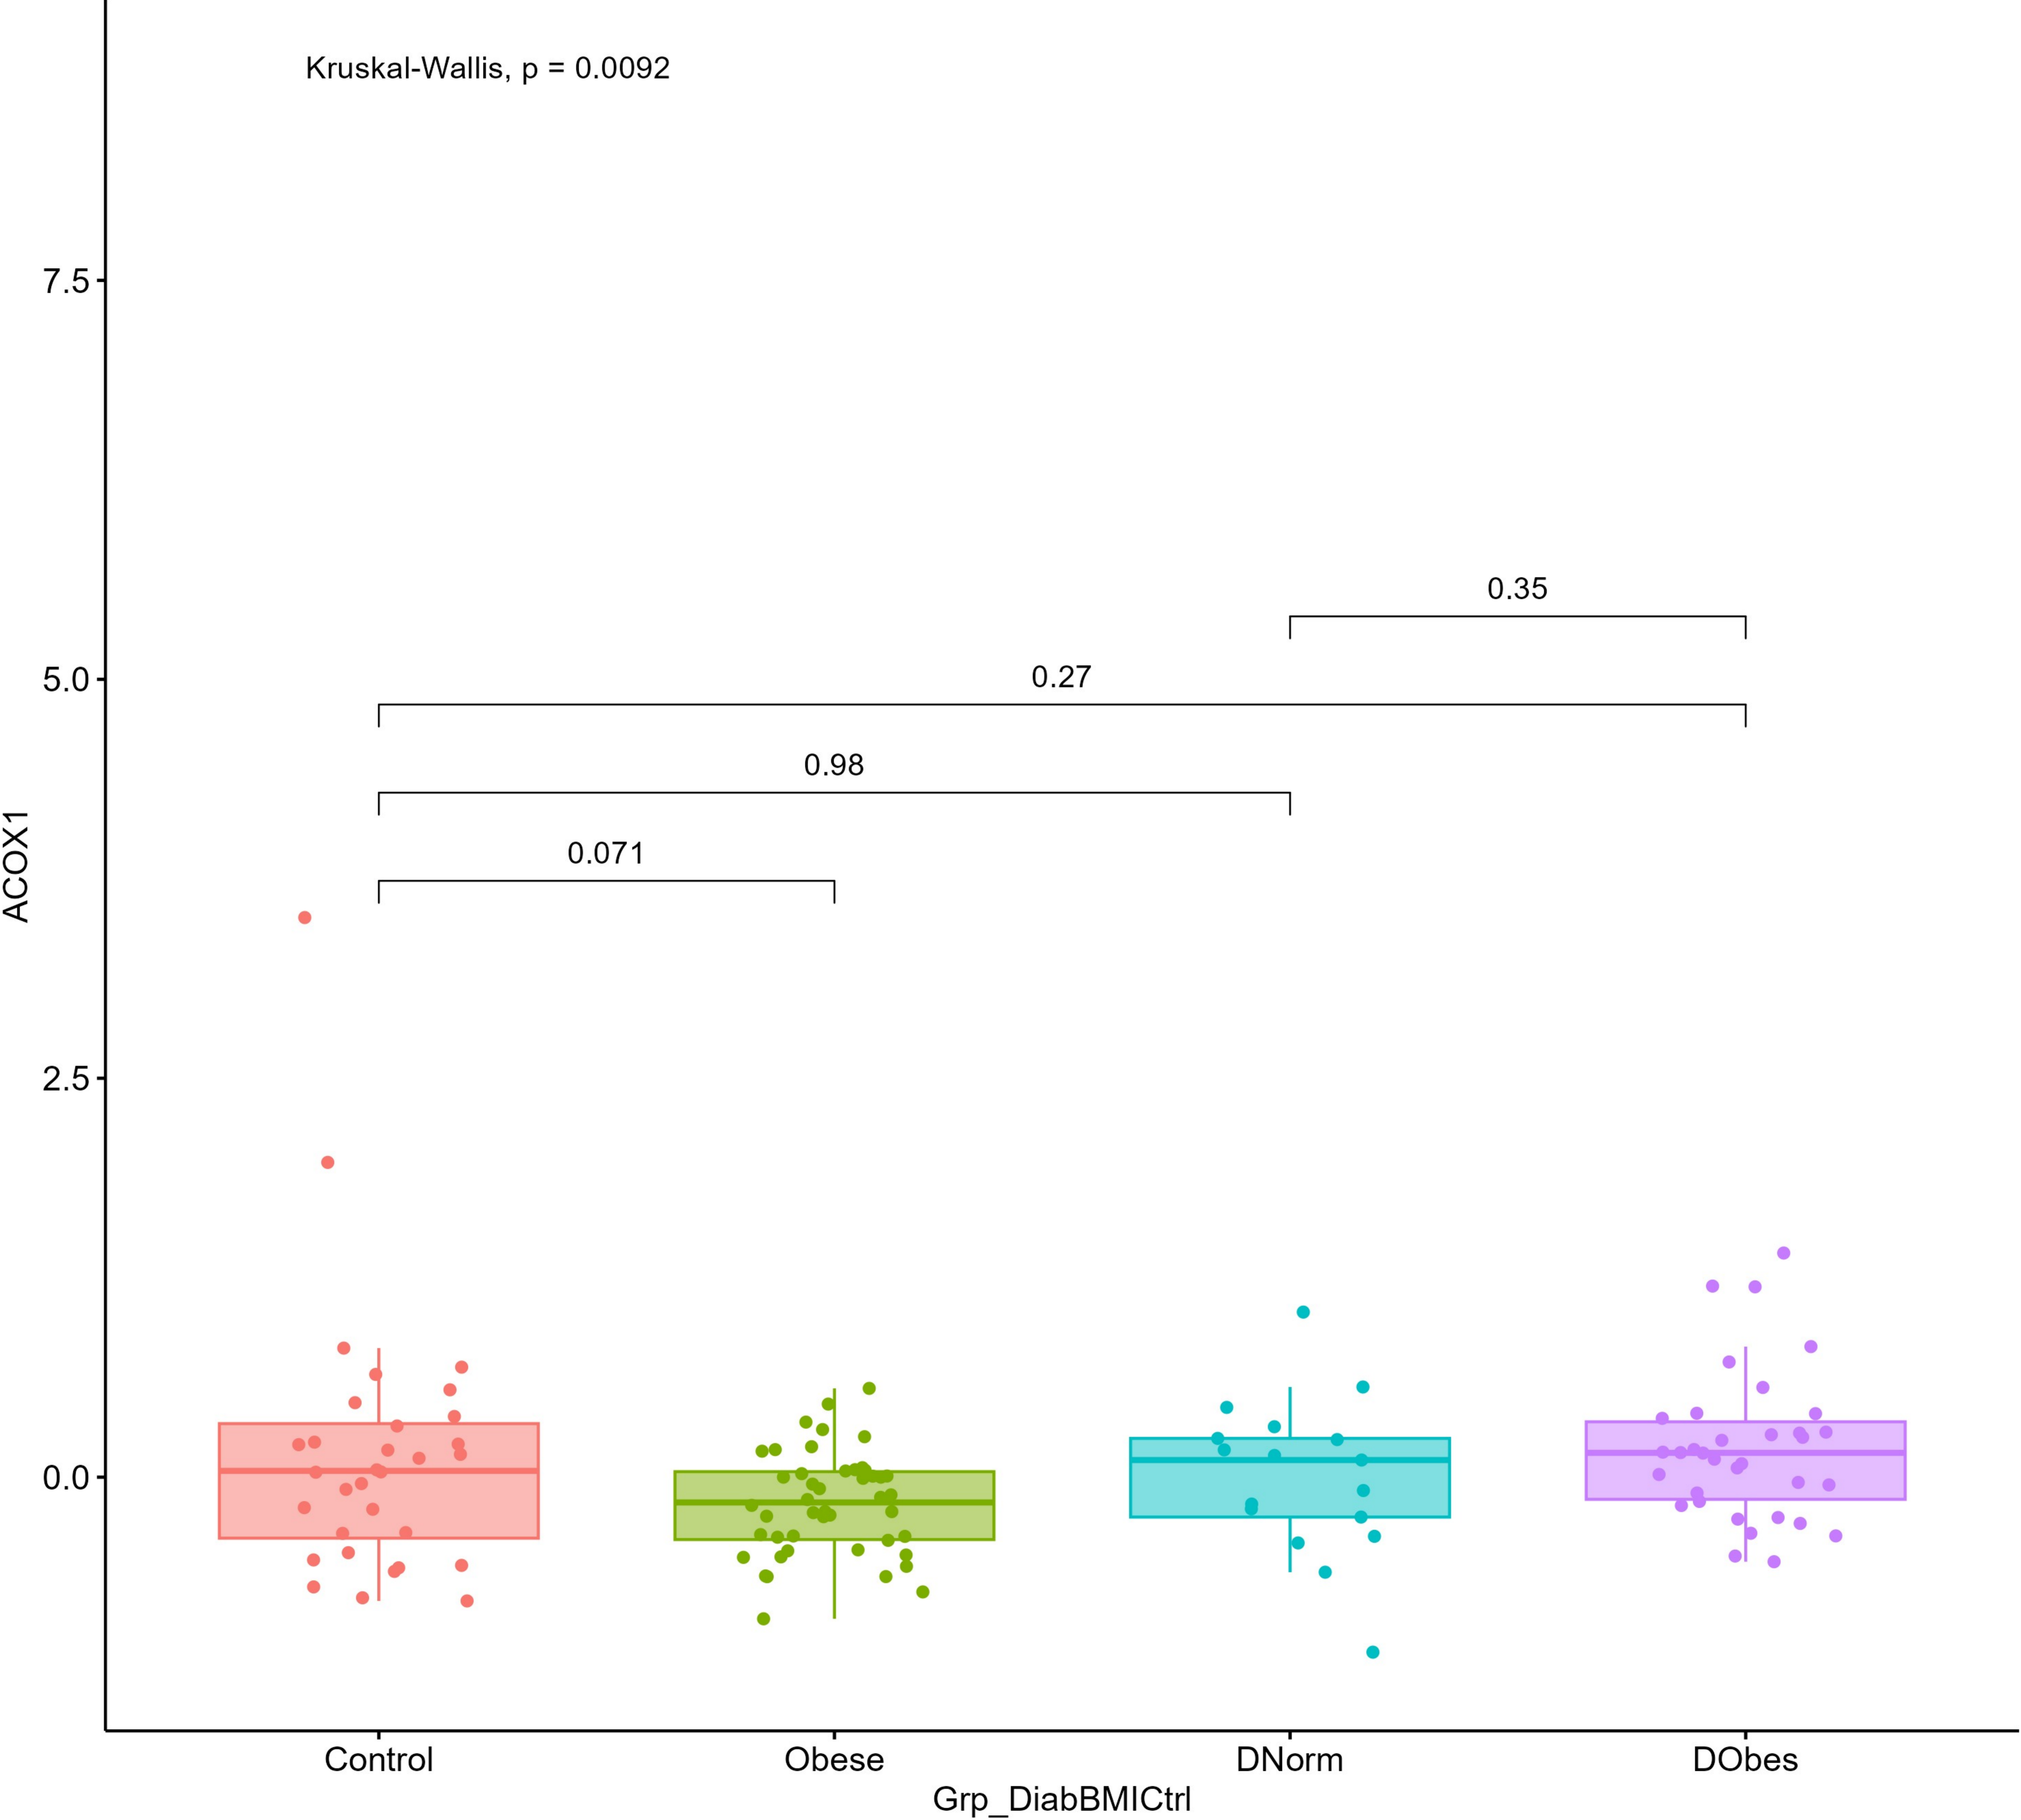

# Grp\_DiabBMICtrl

Grp\_DiabBMICtrl Control Obese DNorm DObes

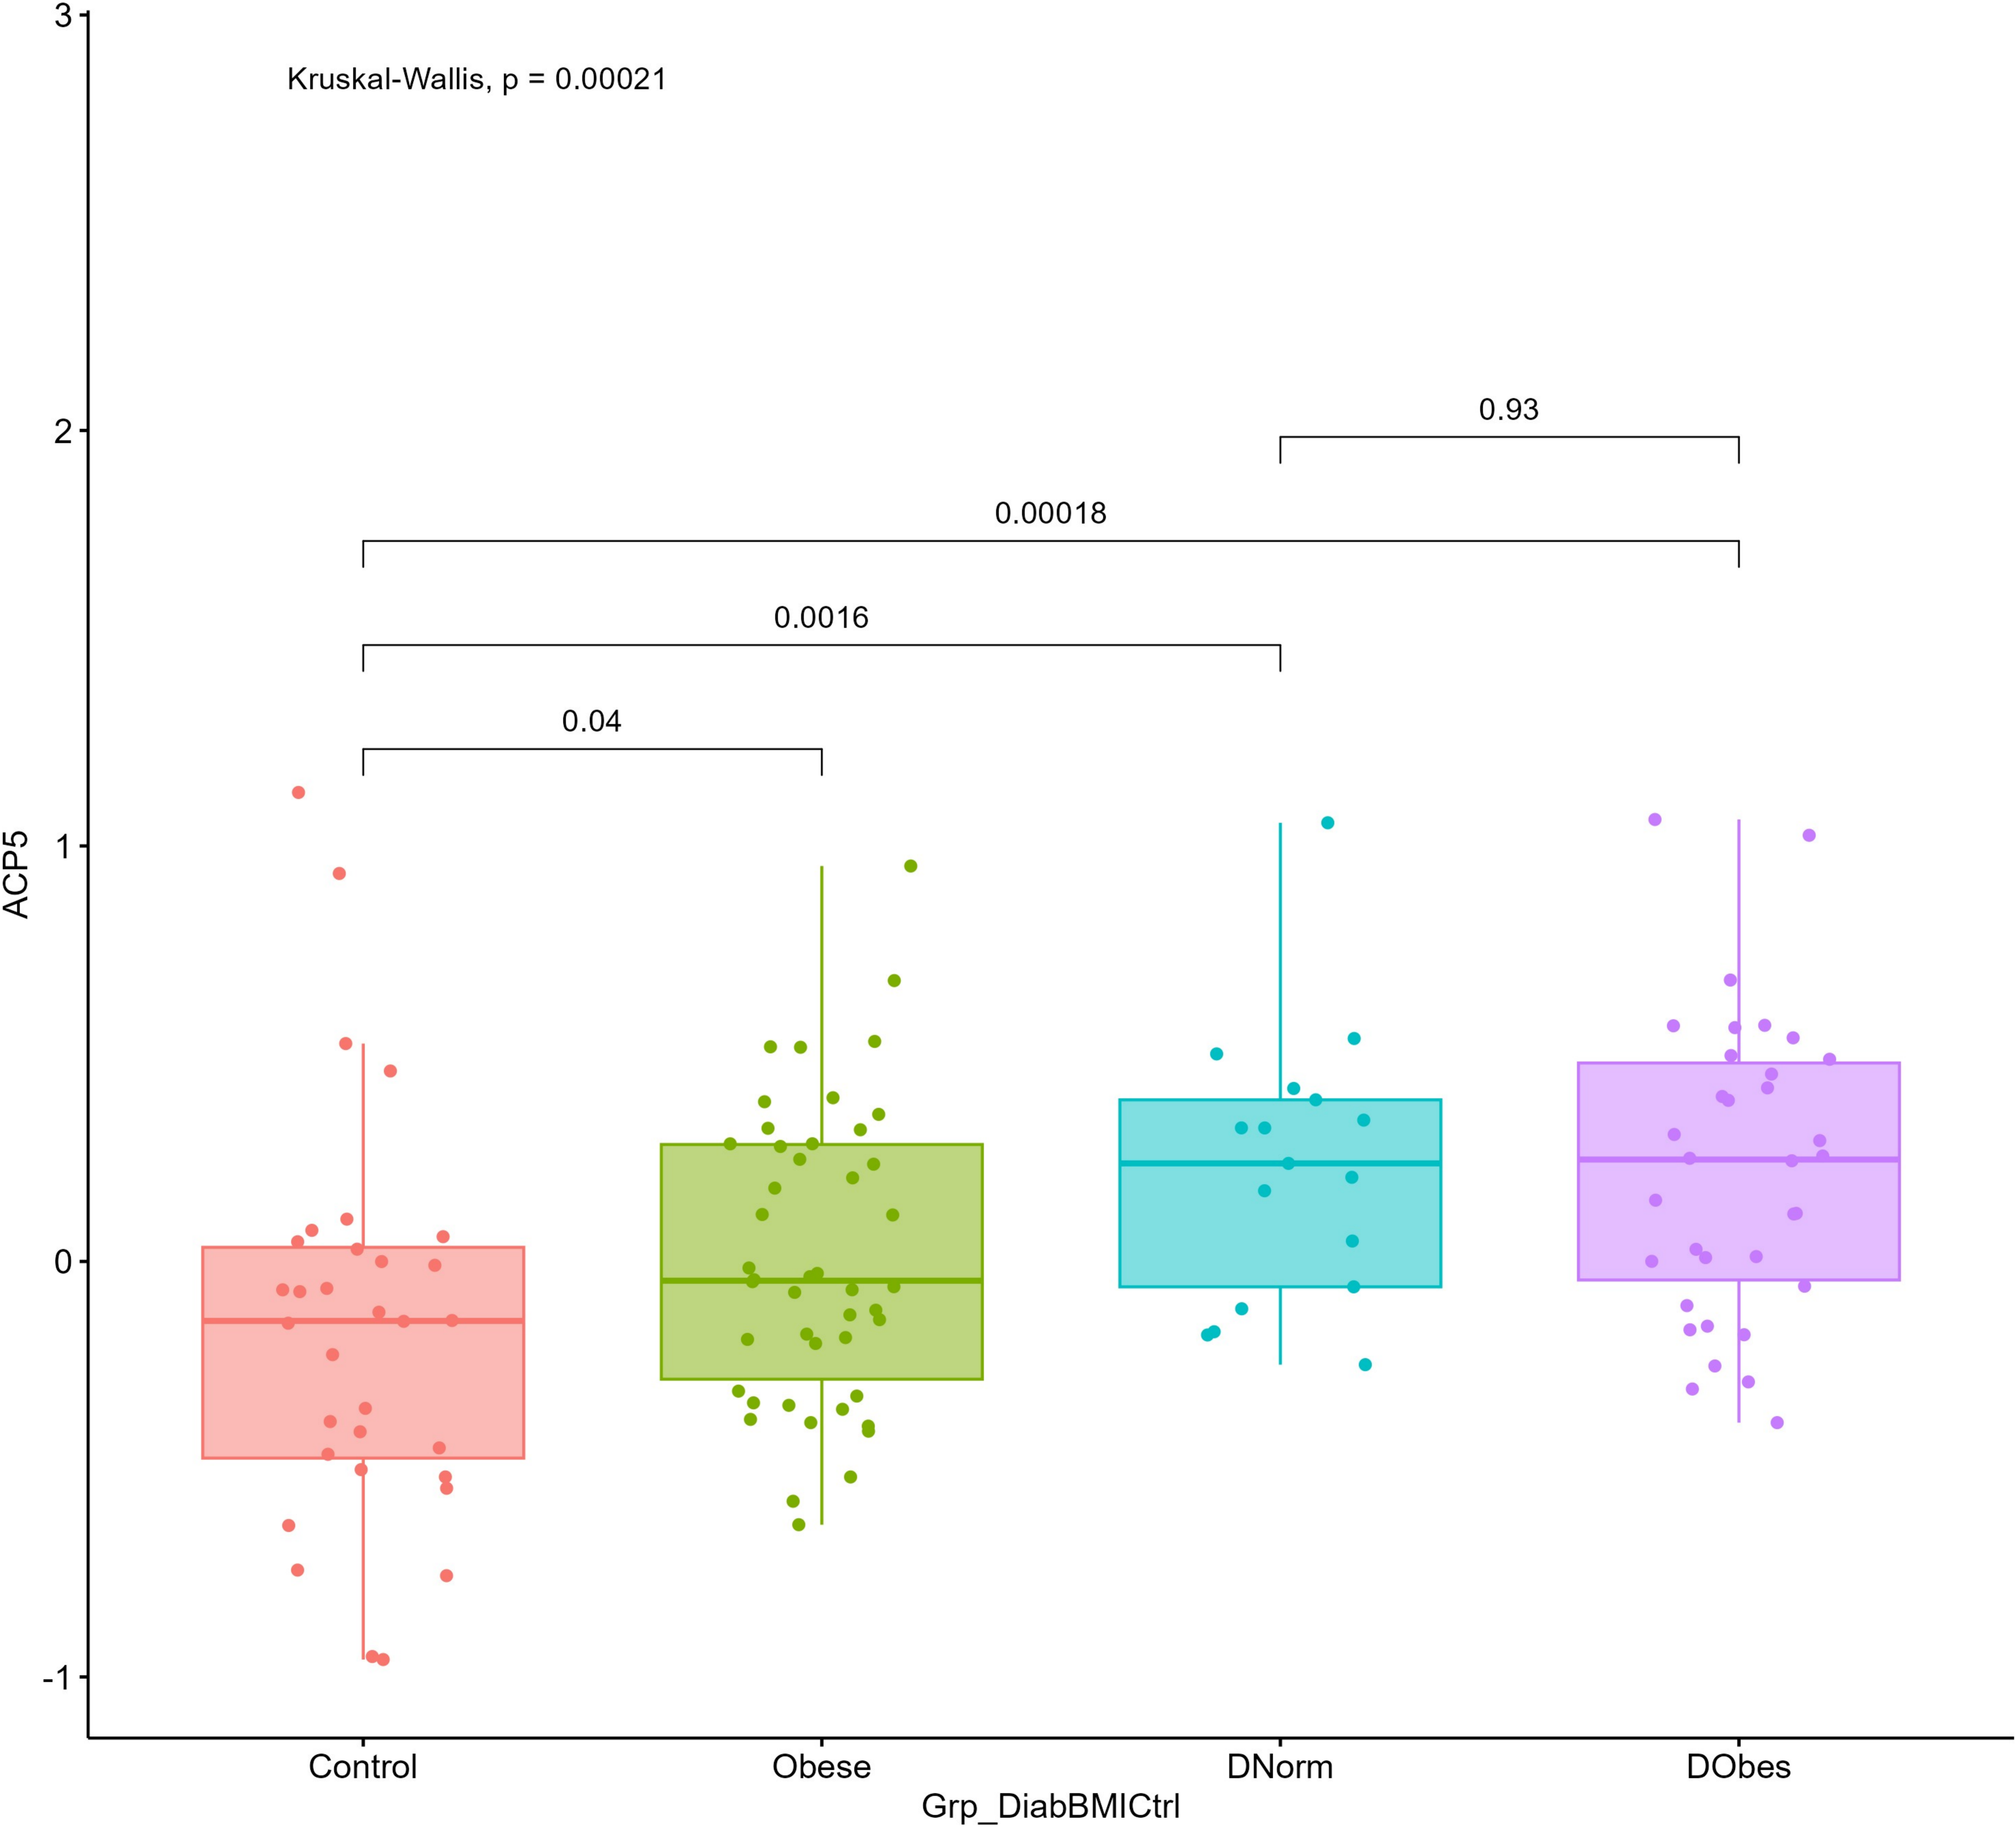

# Grp\_DiabBMICtrl

Grp\_DiabBMICtrl Control Obese DNorm DObes

Kruskal-Wallis,  $p = 5.7\text{e-}08$

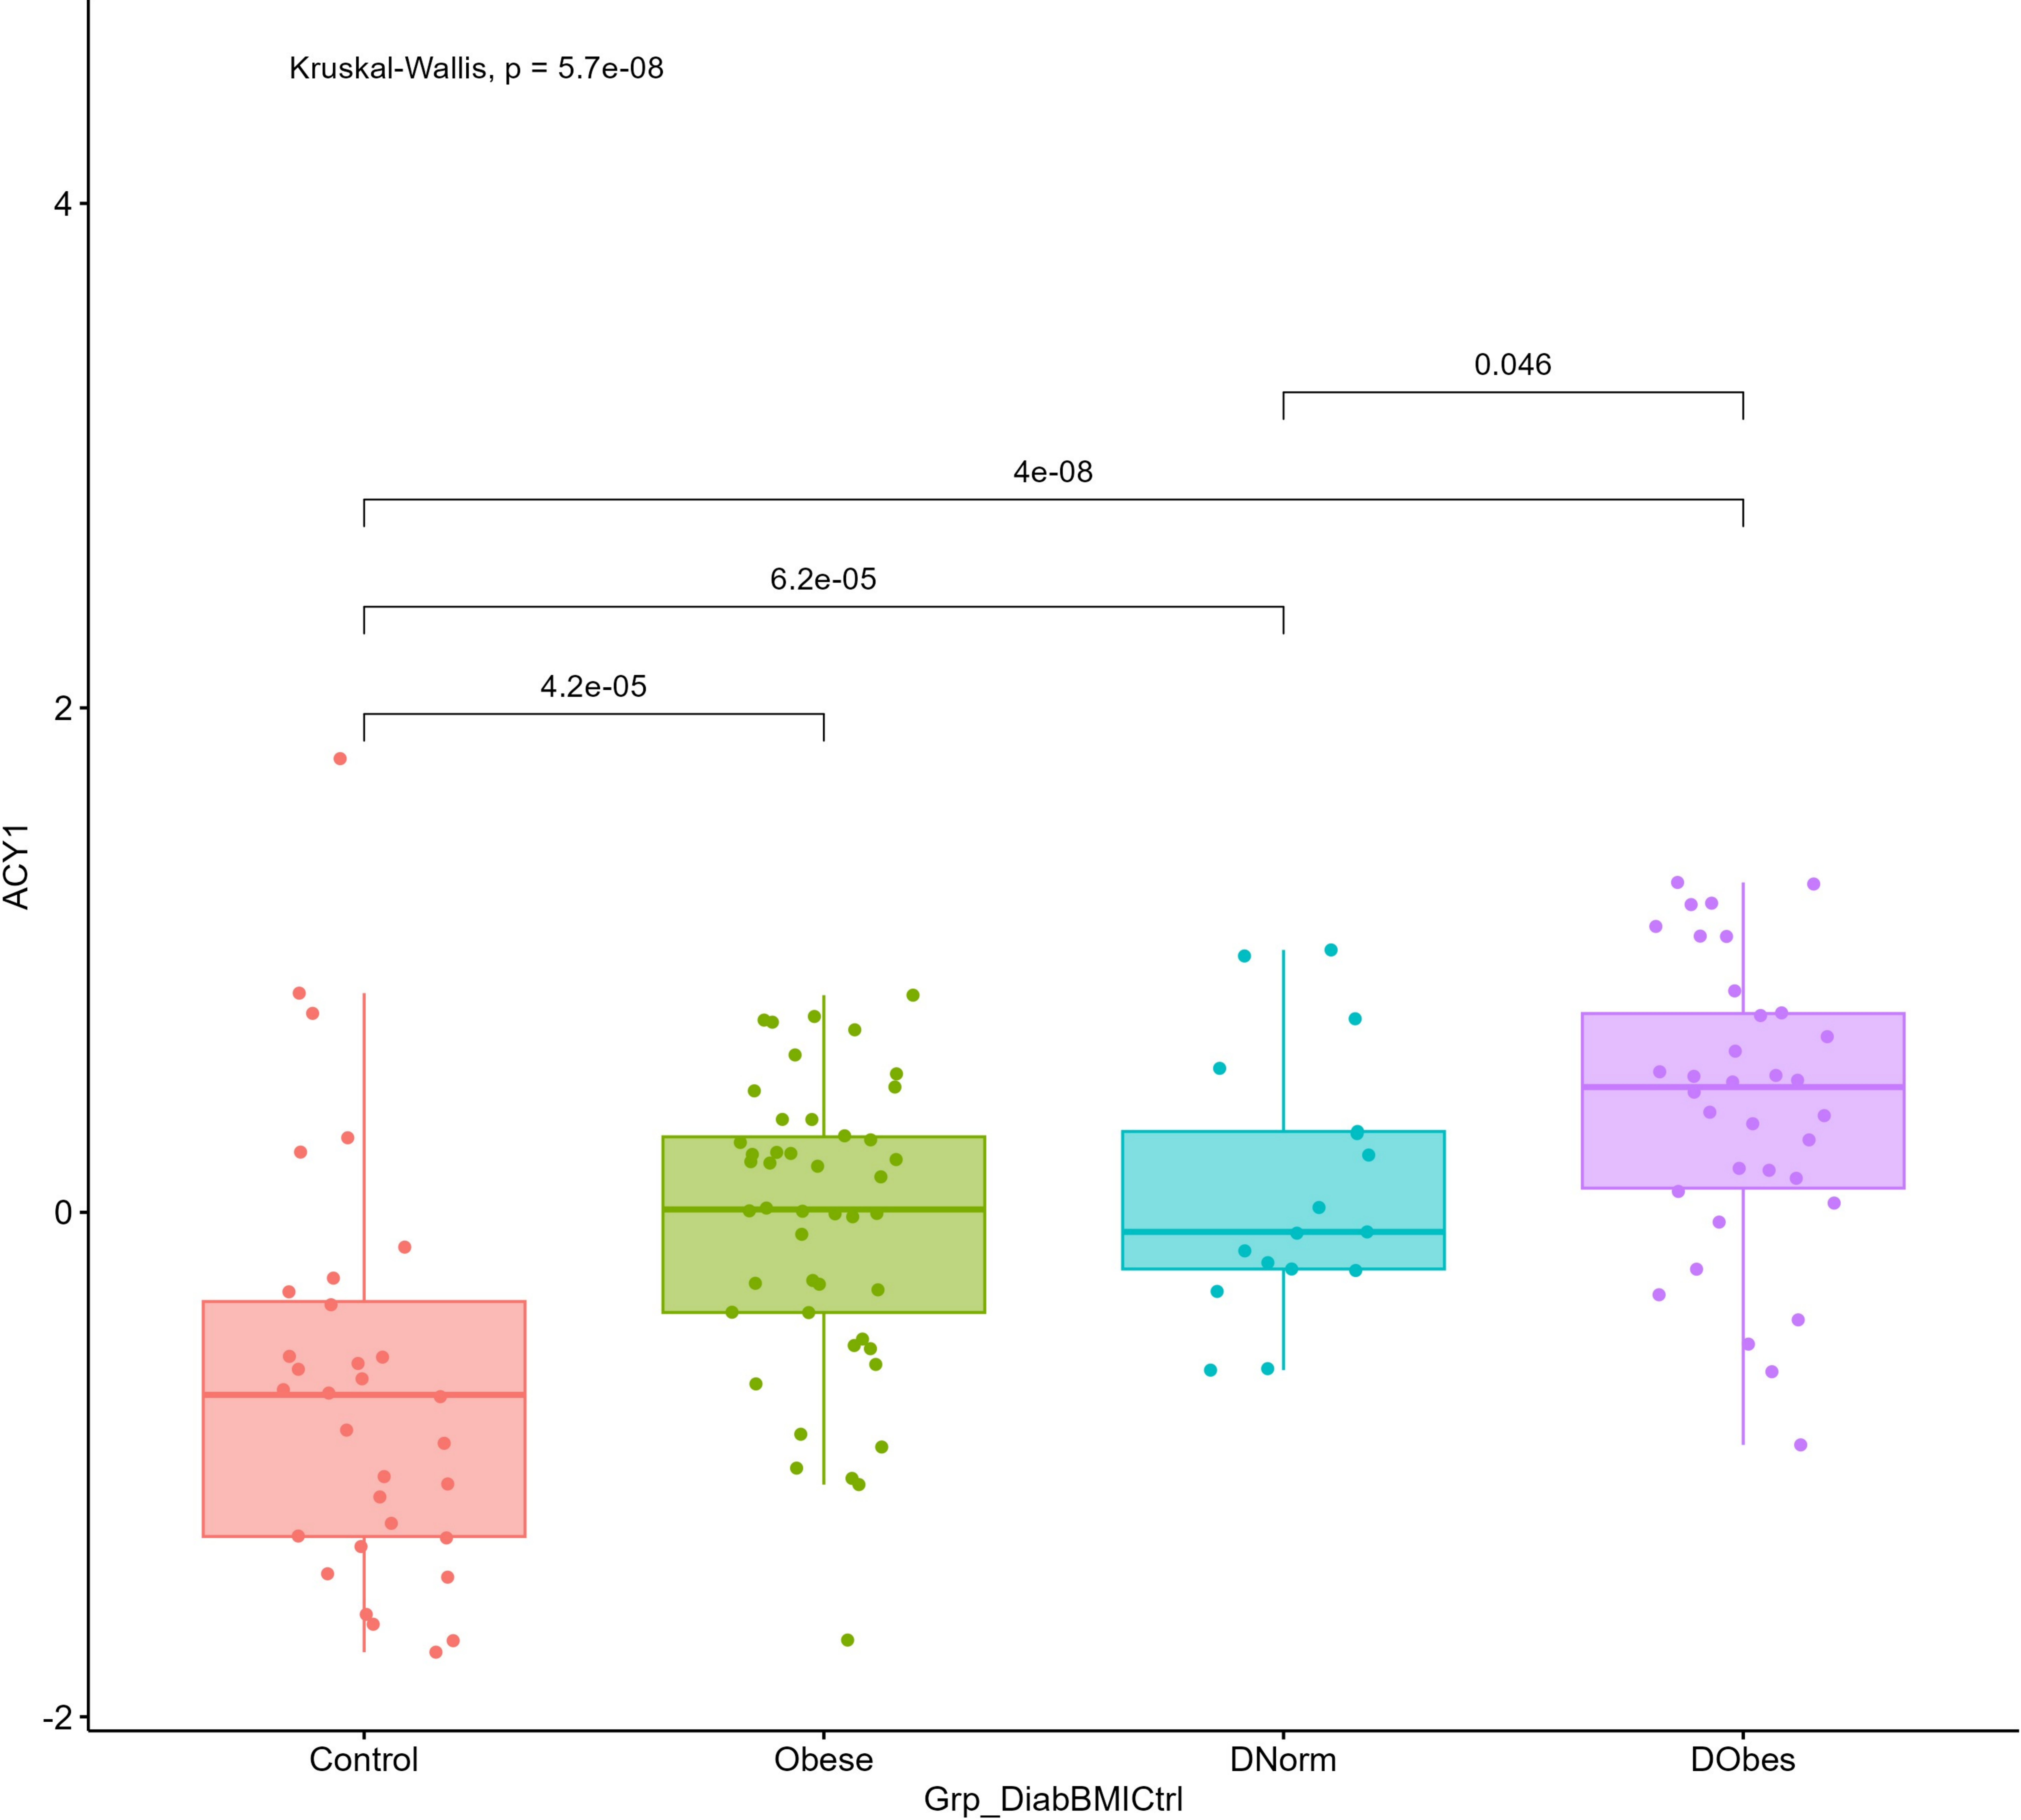

# Grp\_DiabBMICtrl

Grp\_DiabBMICtrl Control Obese DNorm DObes

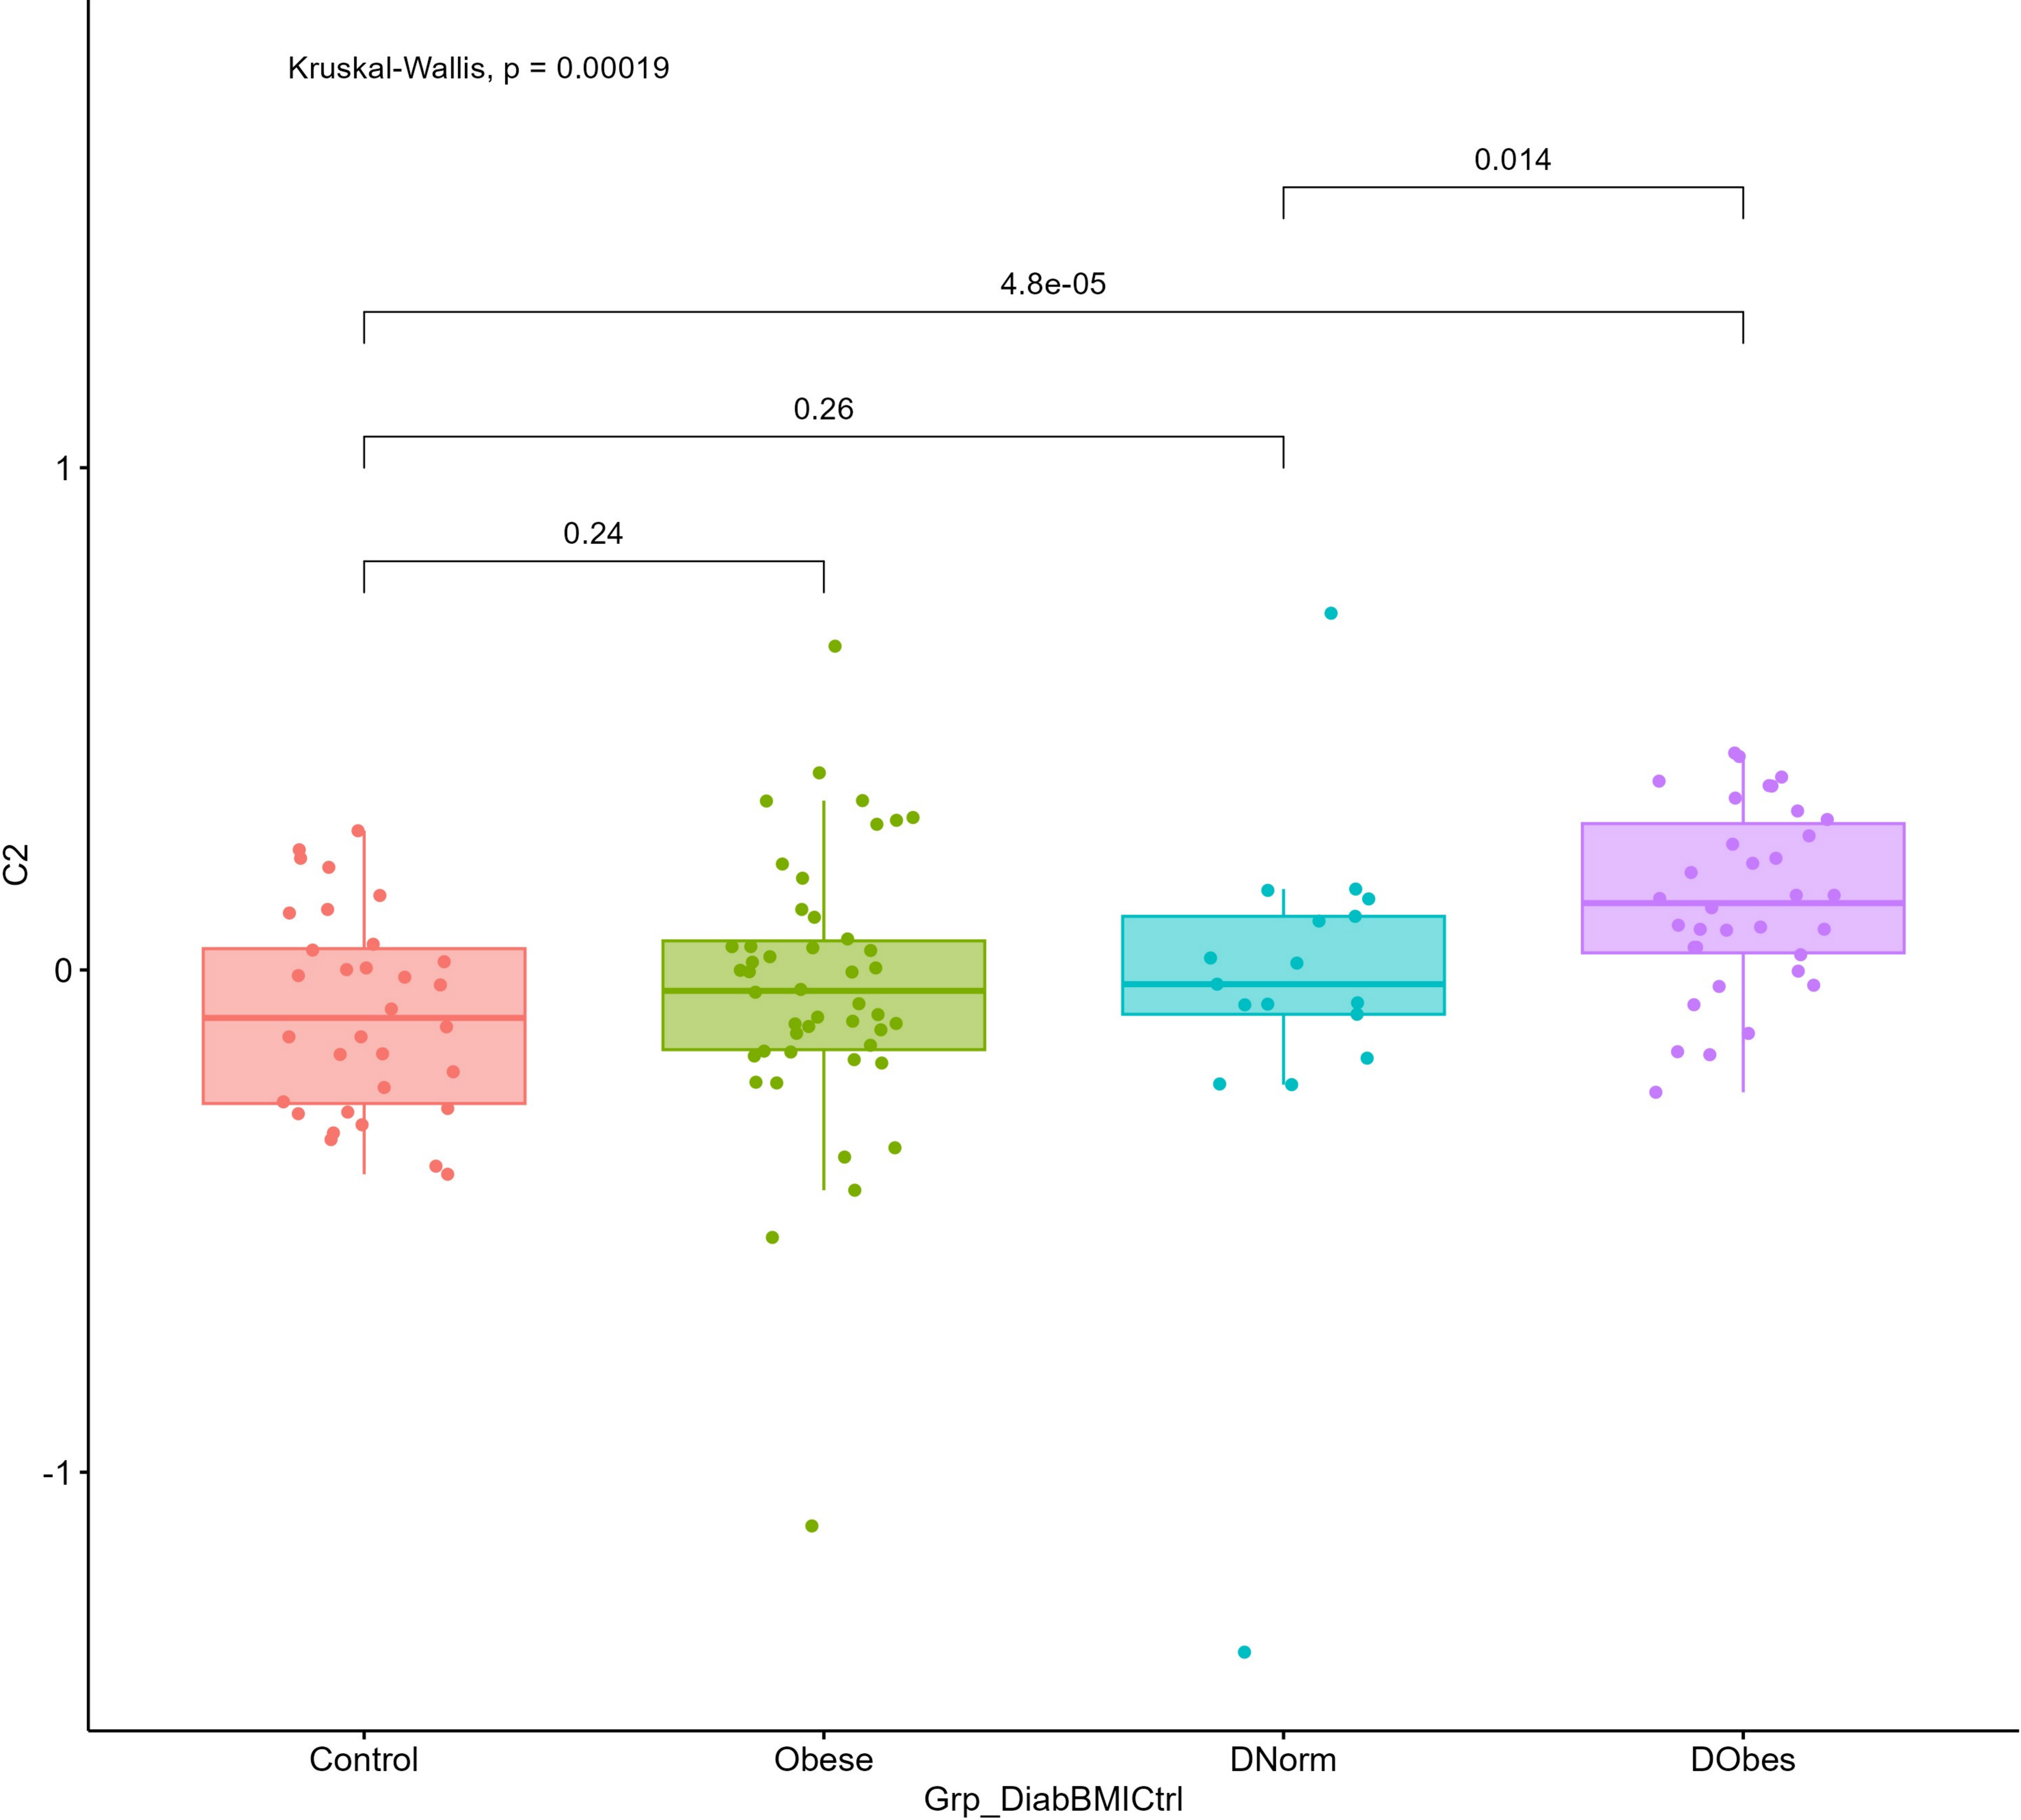

# Grp\_DiabBMICtrl

Grp\_DiabBMICtrl Control Obese DNorm DObes

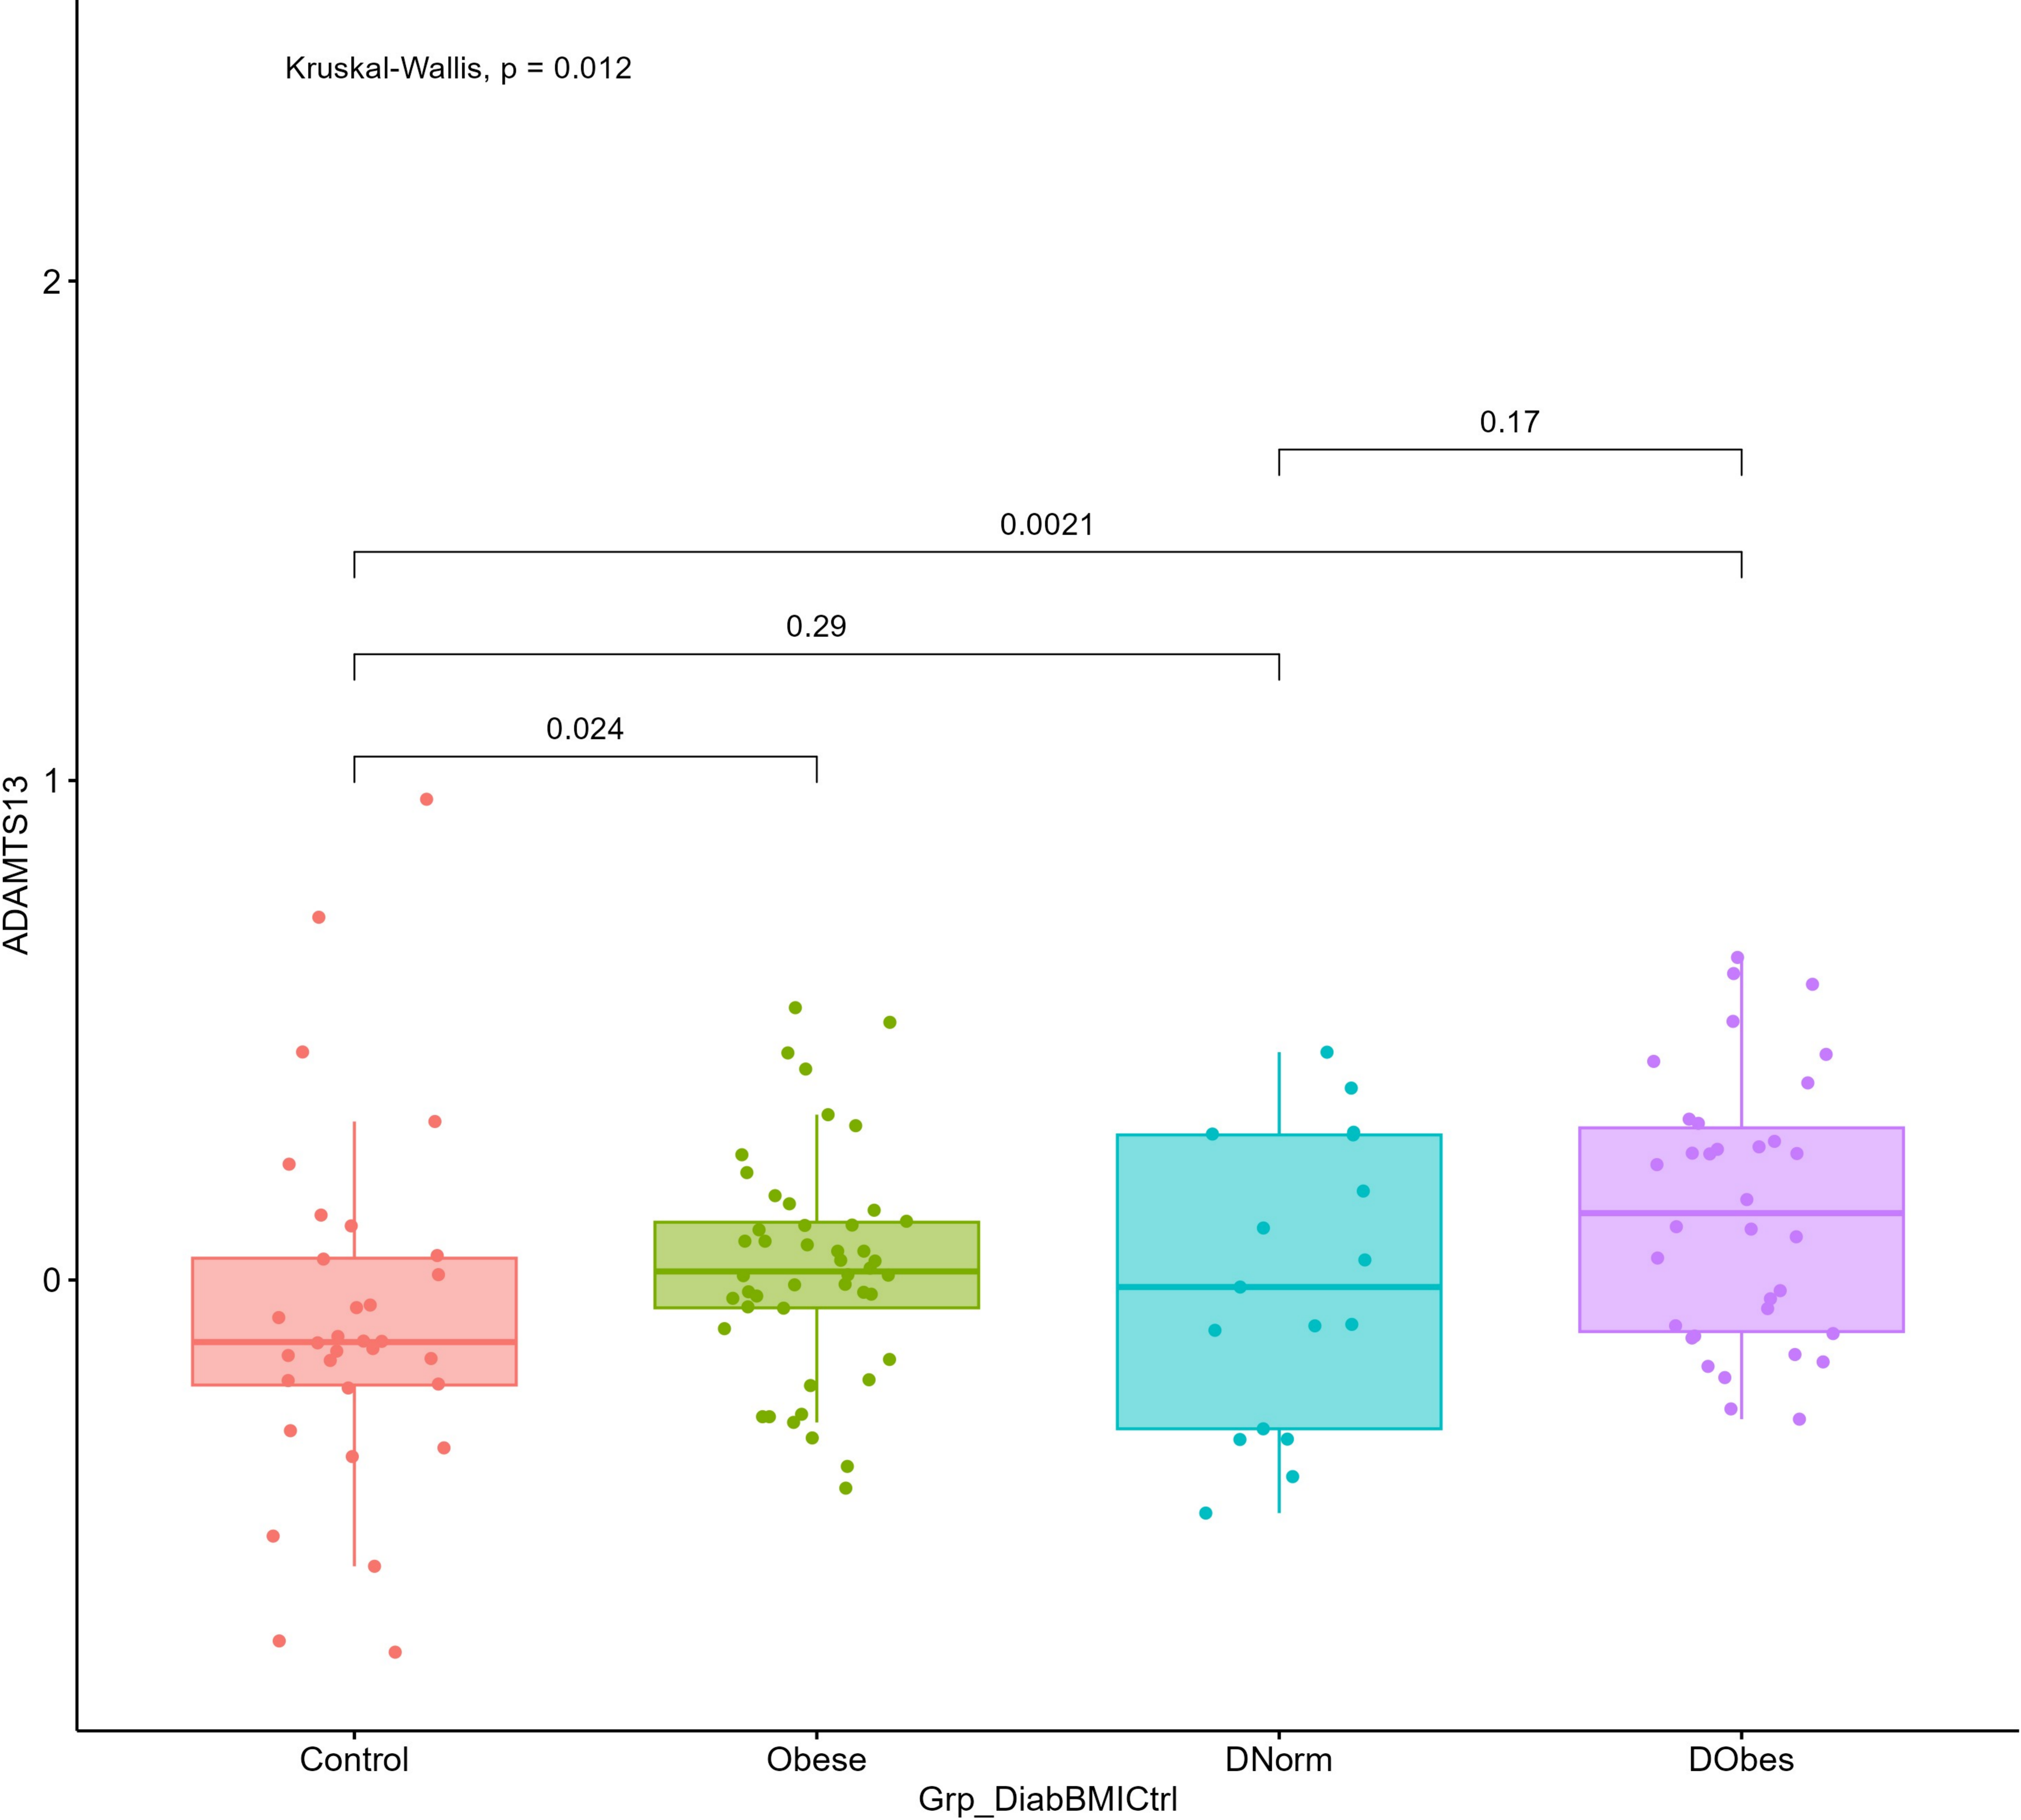

# Grp\_DiabBMICtrl

Grp\_DiabBMICtrl Control Obese DNorm DObes

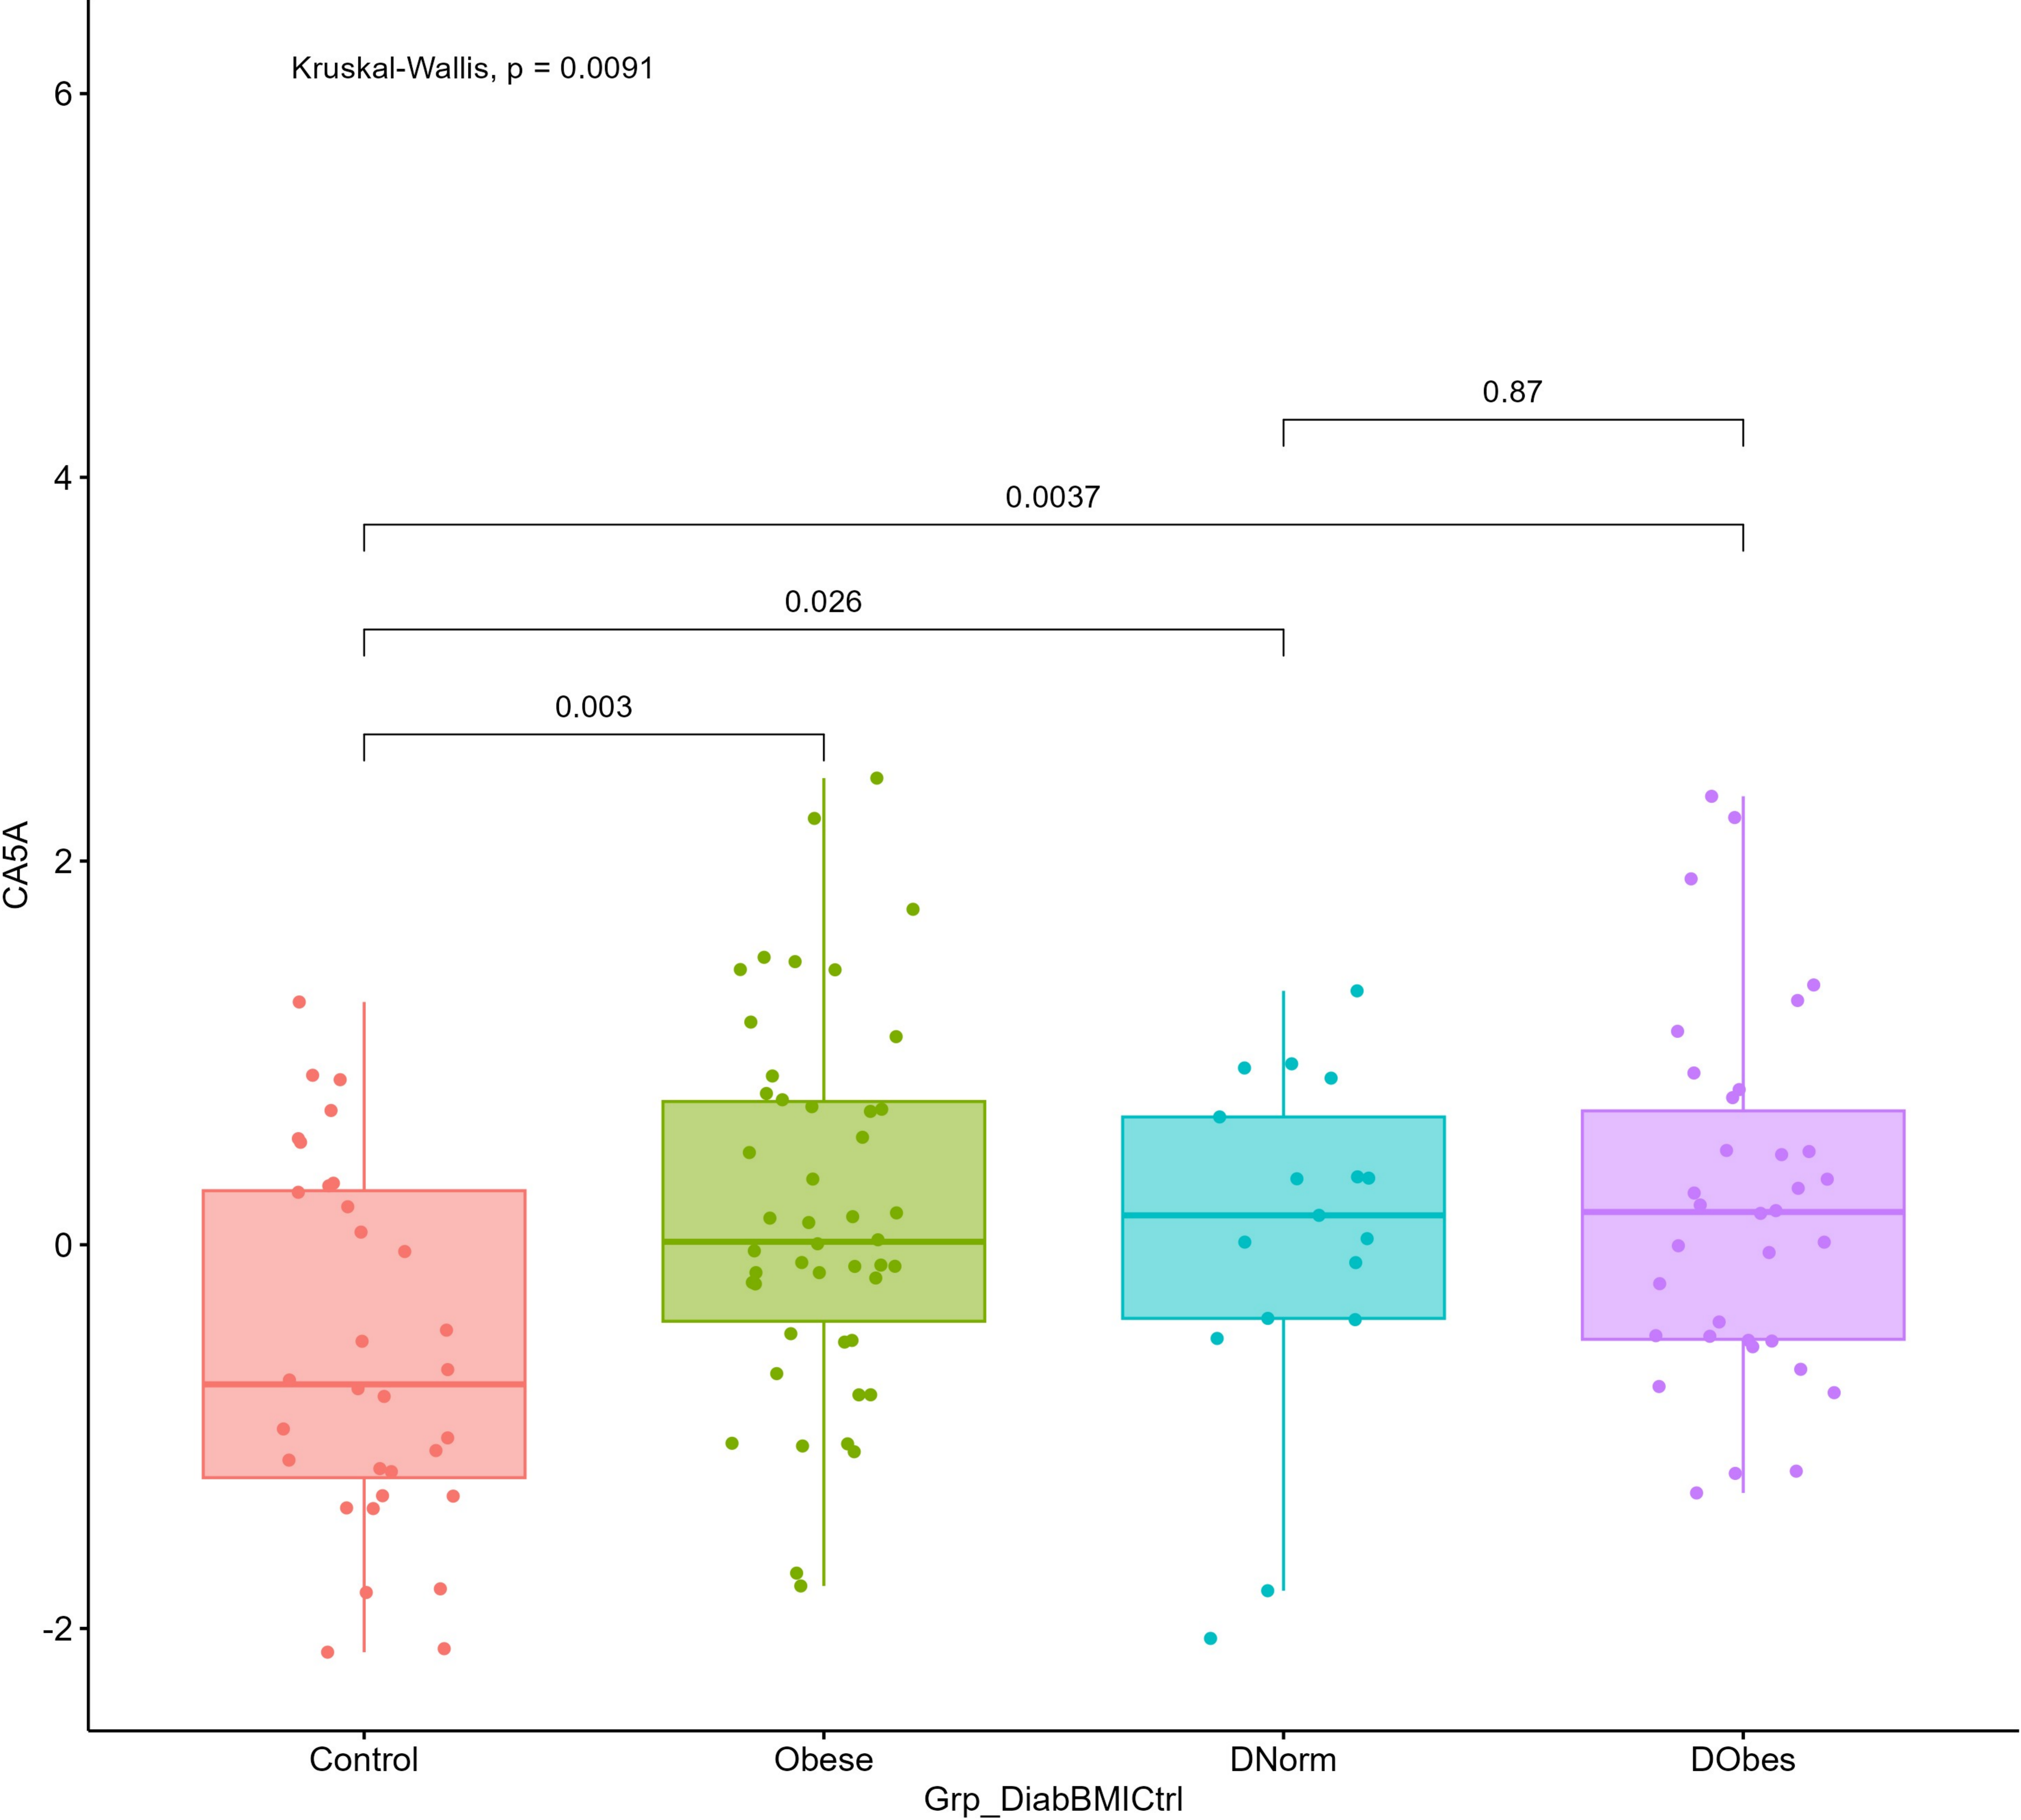

# Grp\_DiabBMICtrl

Grp\_DiabBMICtrl Control Obese DNorm DObes

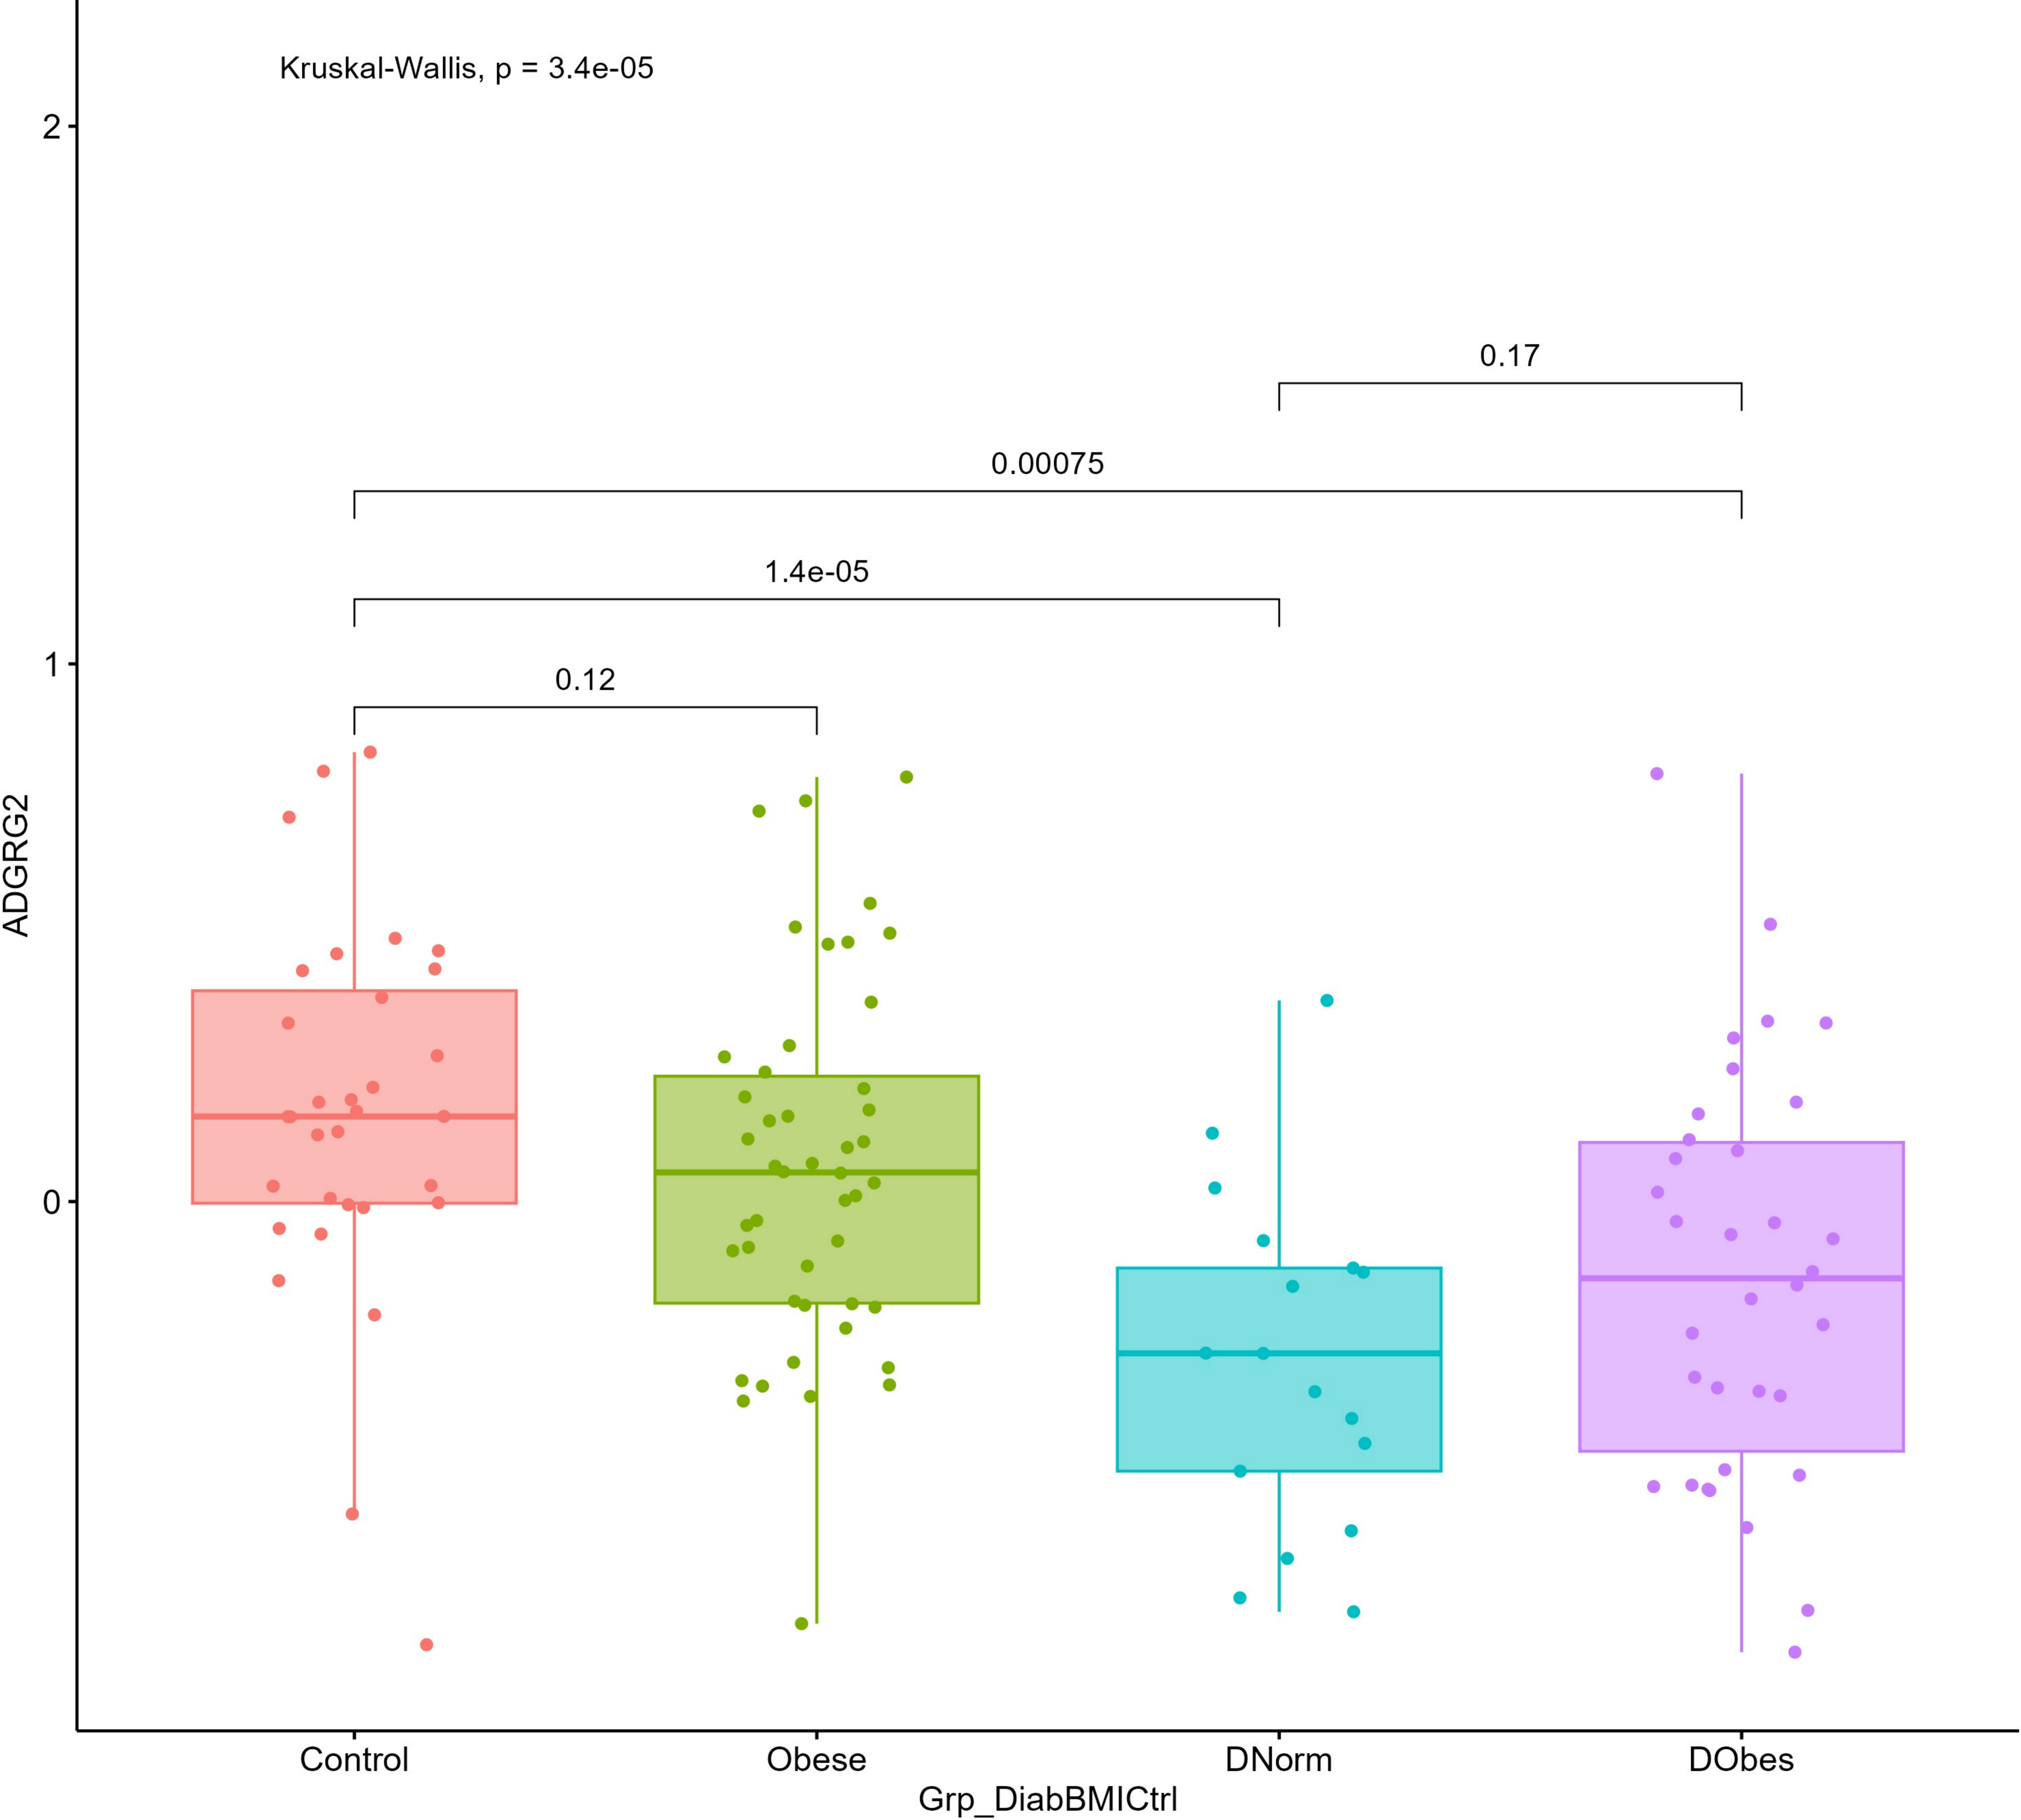

# Grp\_DiabBMICtrl

Grp\_DiabBMICtrl Control Obese DNorm DObes

Kruskal-Wallis, p = 0.0094

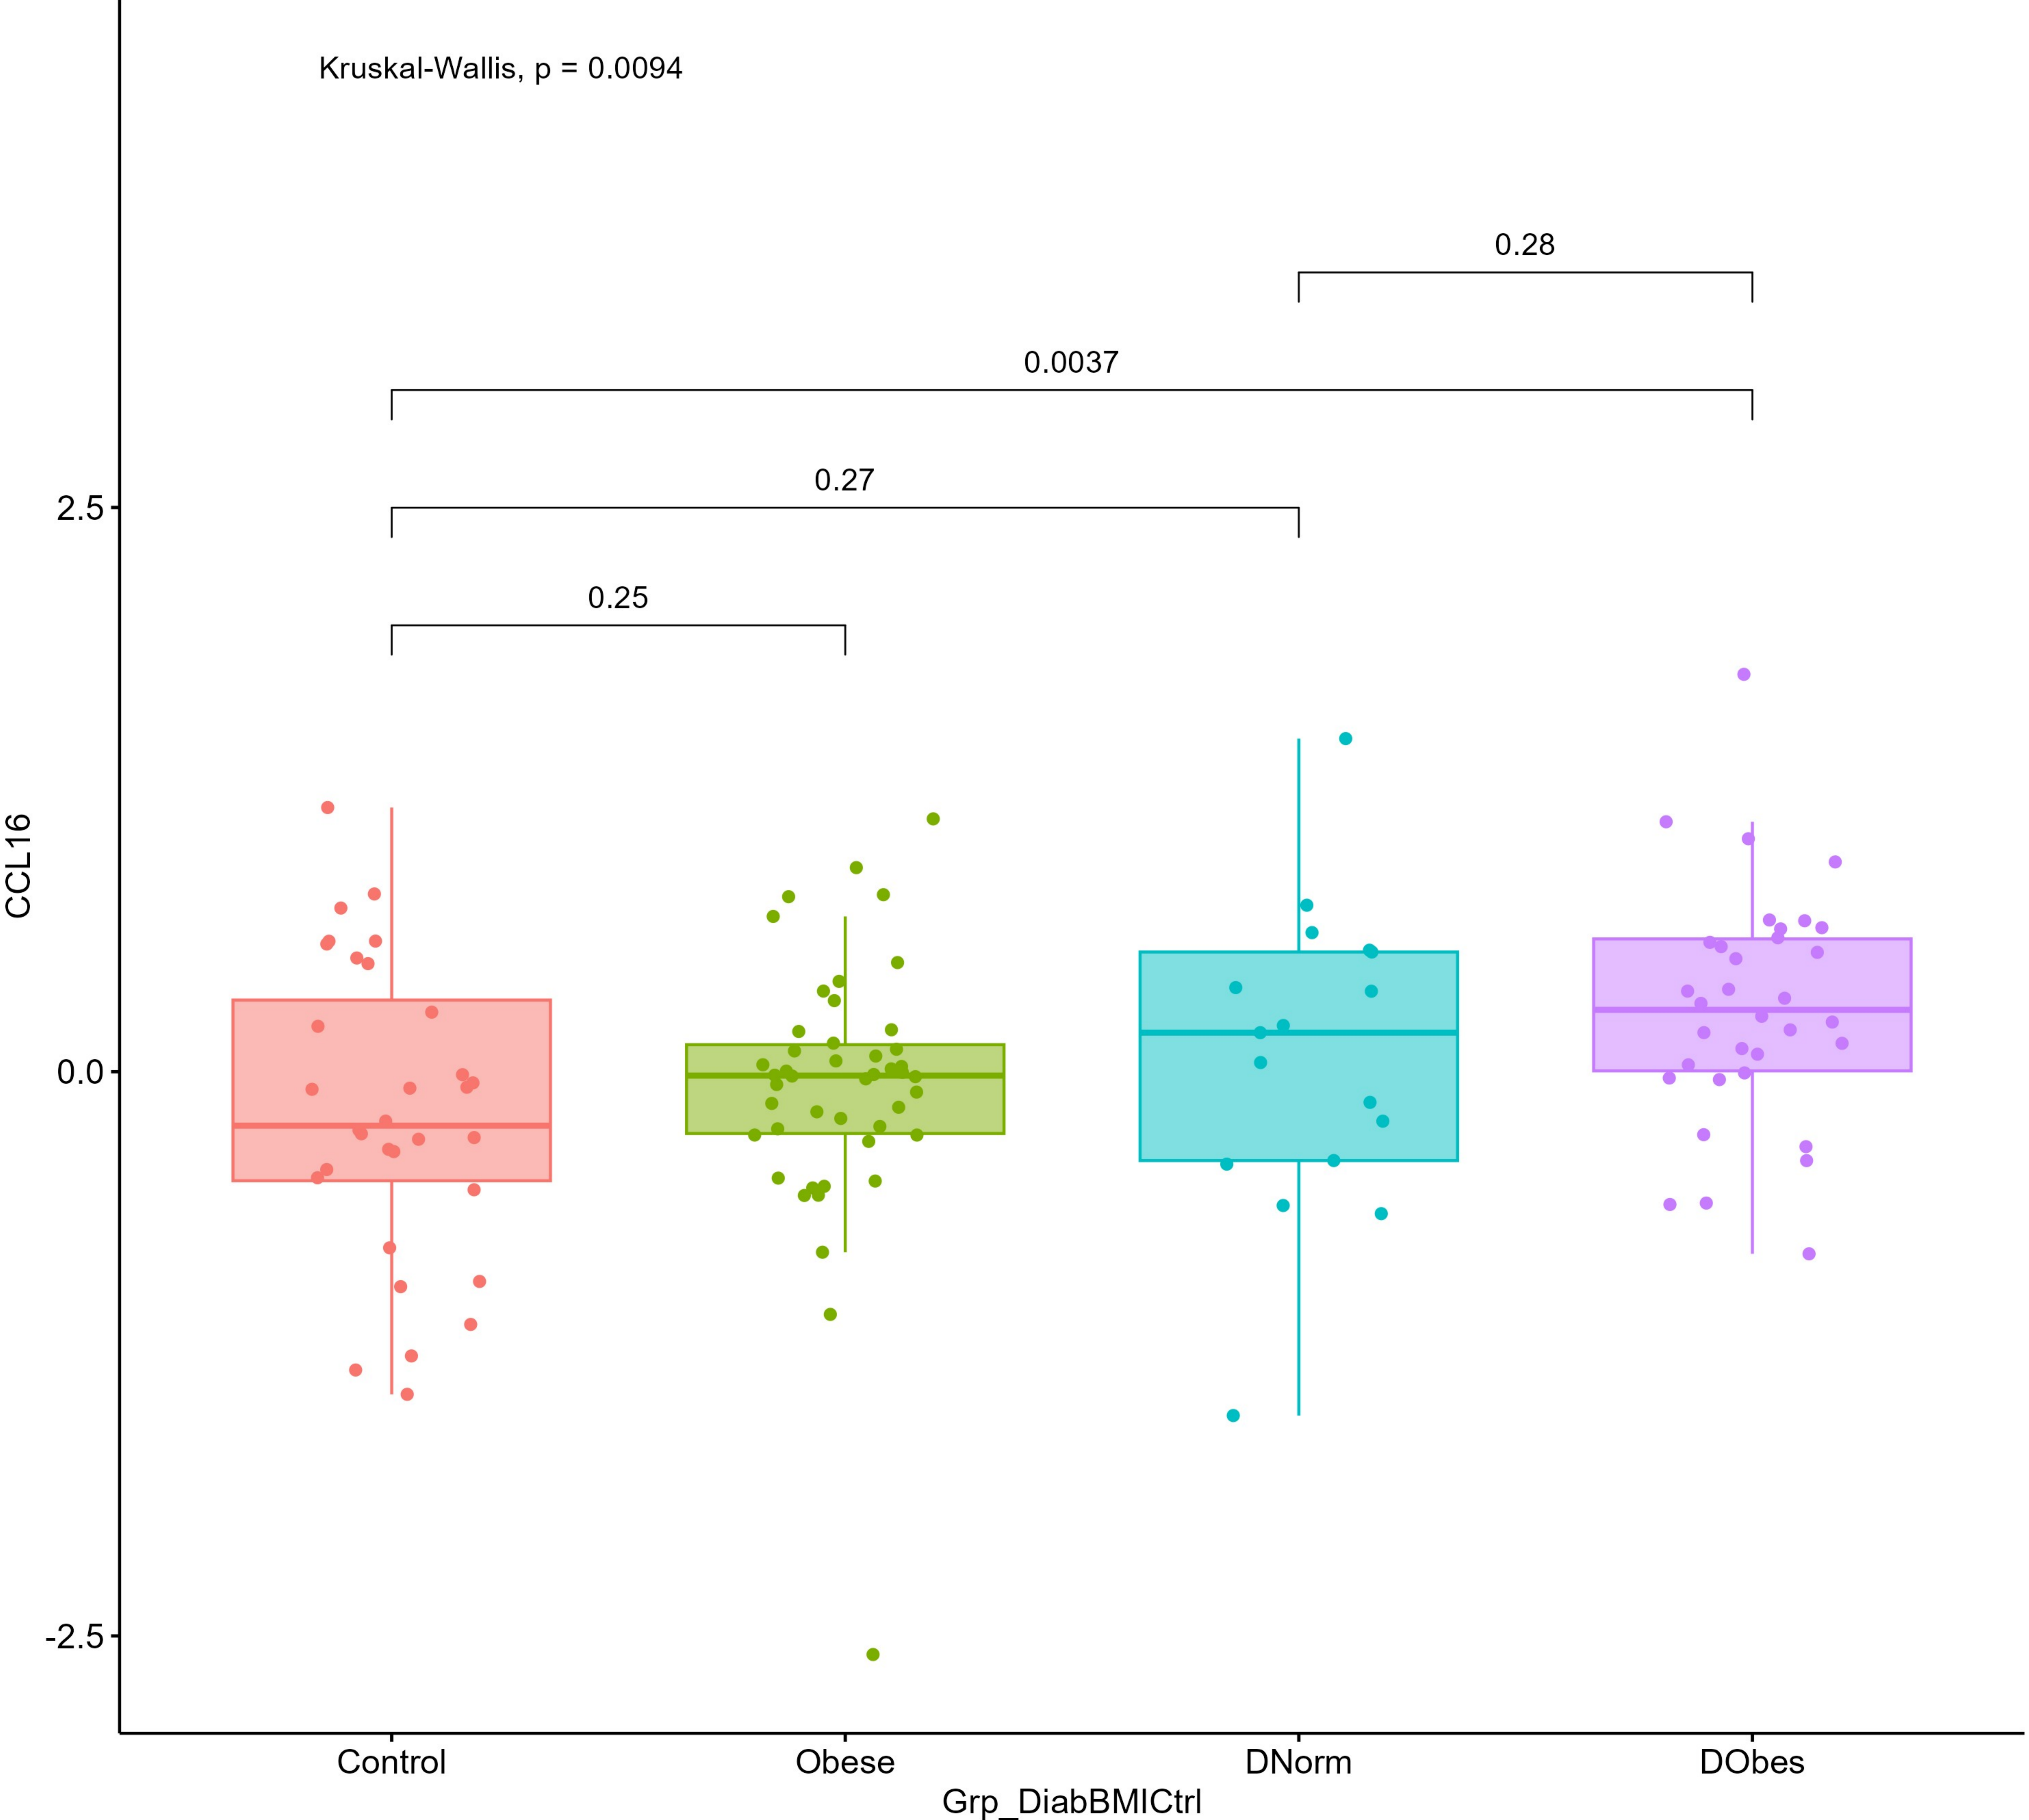

# Grp\_DiabBMICtrl

Grp\_DiabBMICtrl Control Obese DNorm DObes

Kruskal-Wallis,  $p = 9.8e-06$

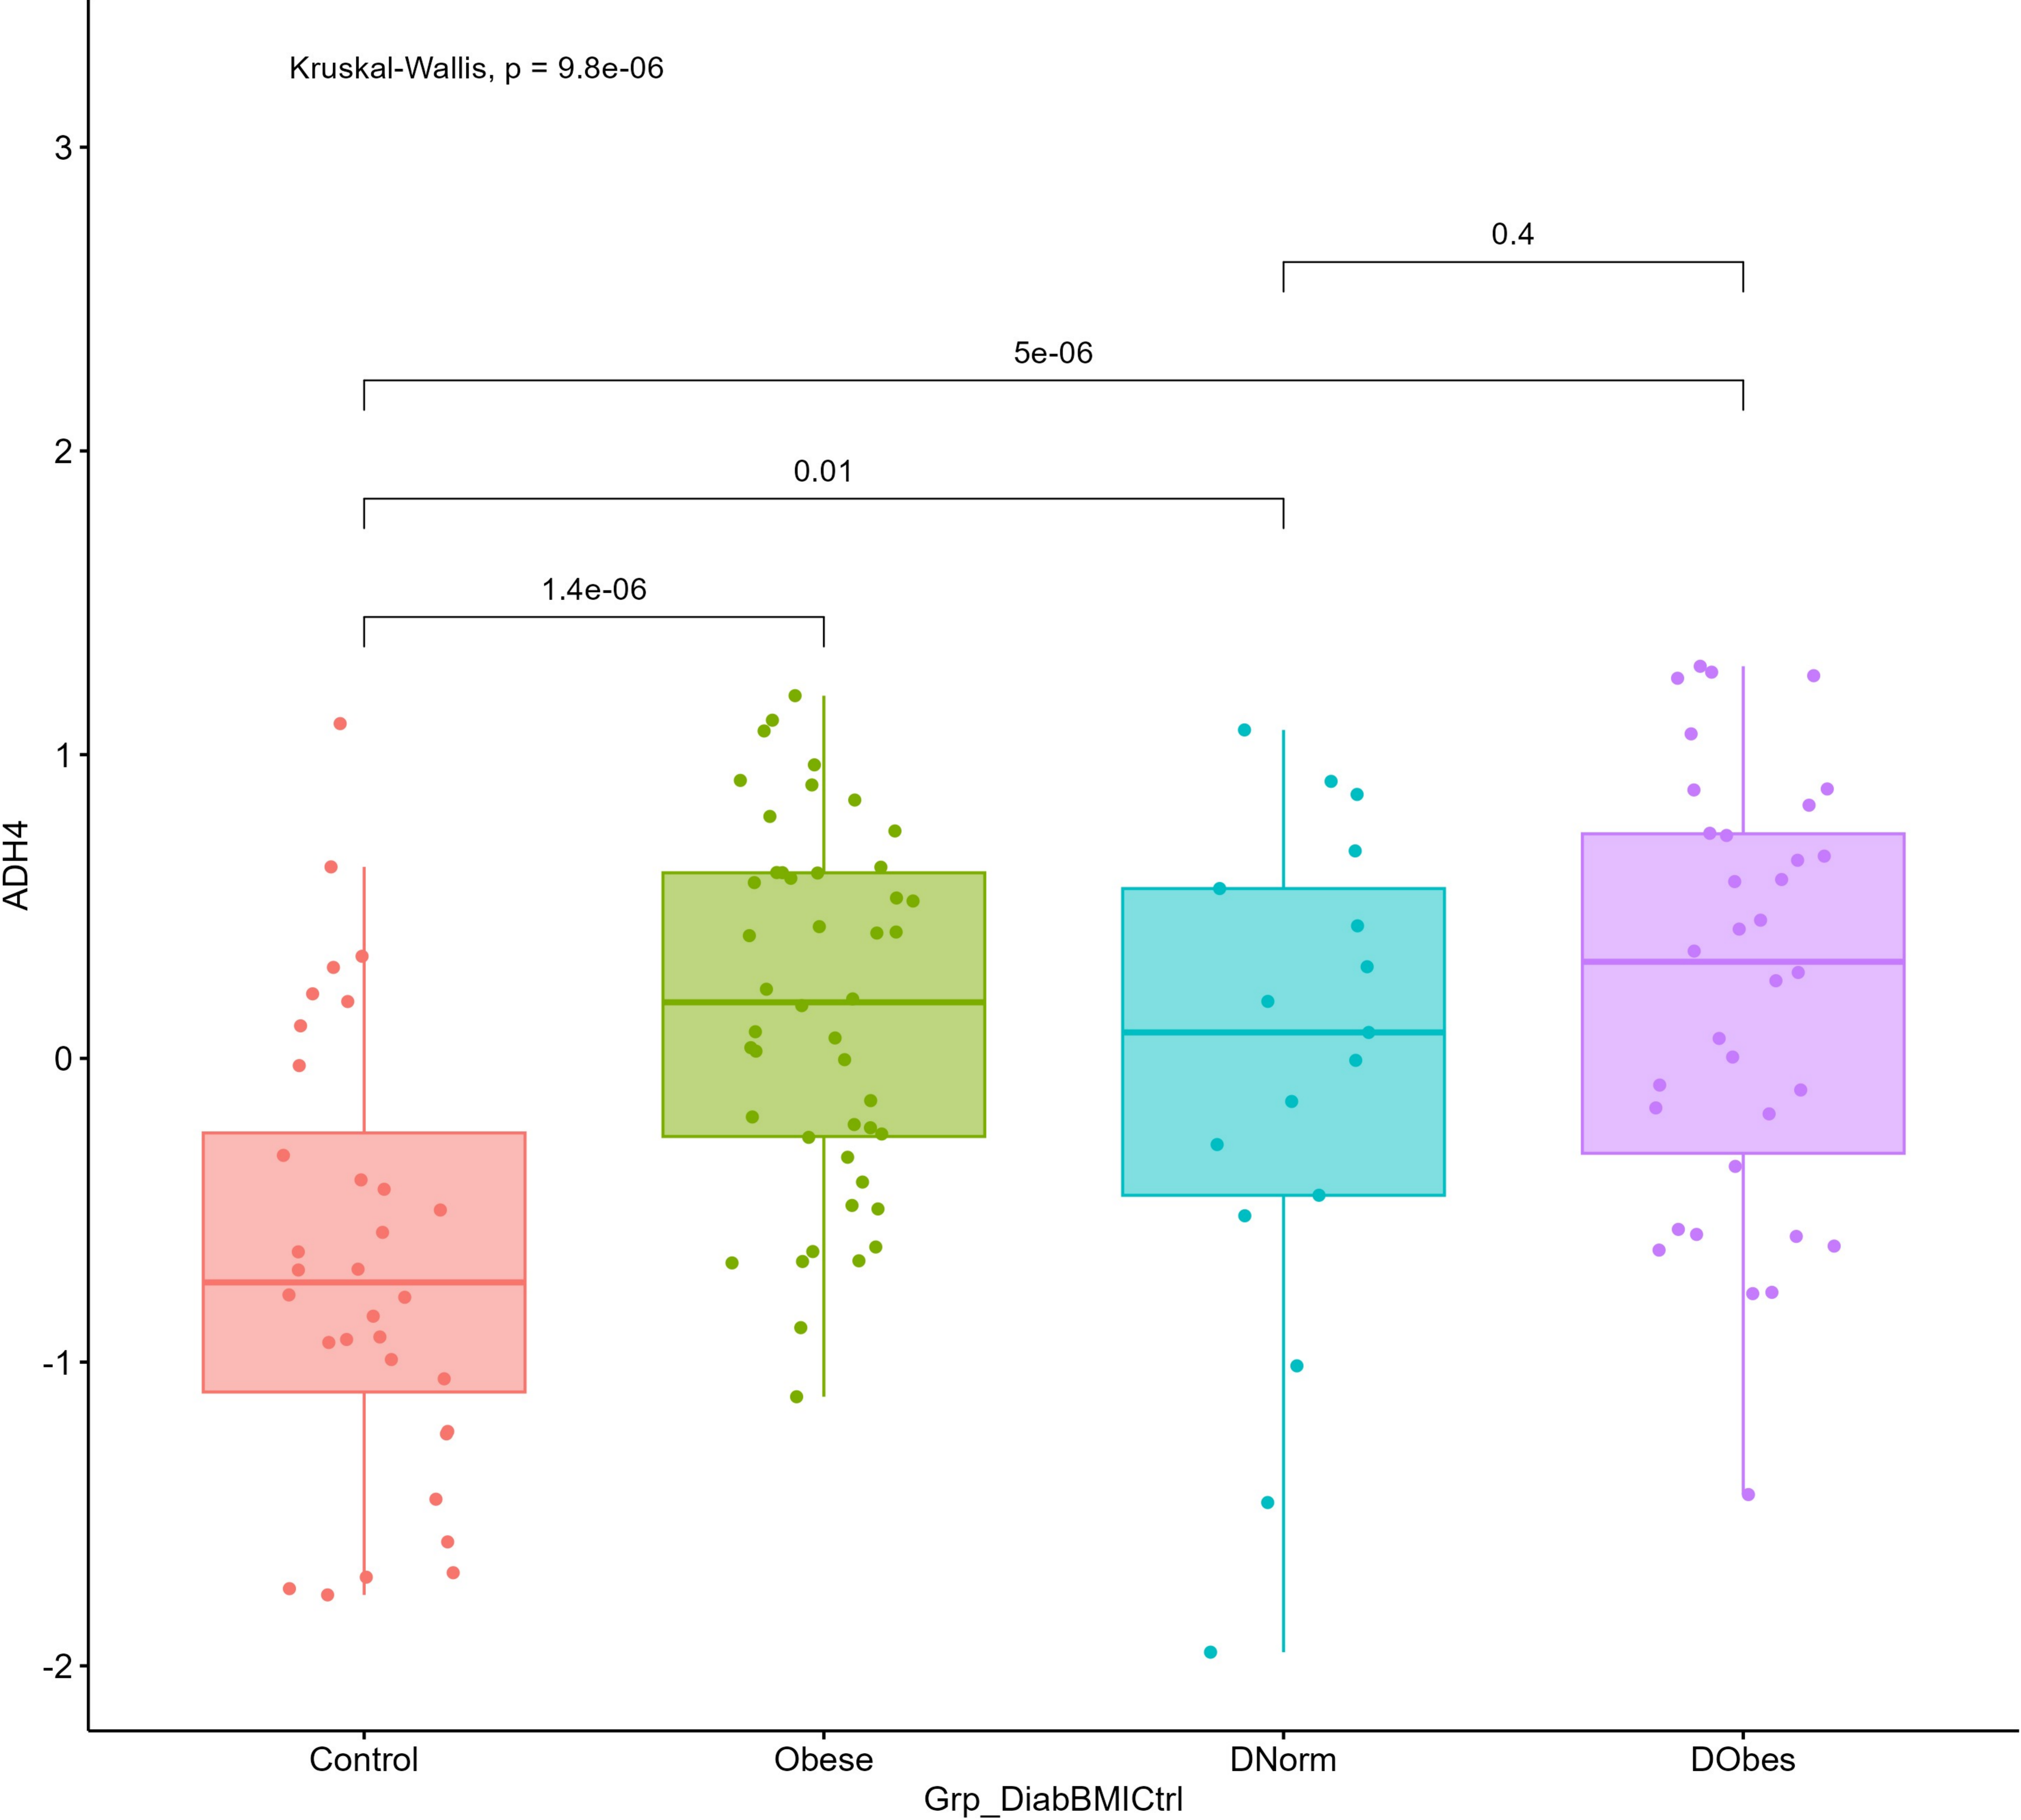

# Grp\_DiabBMICtrl

Grp\_DiabBMICtrl Control Obese DNorm DObes

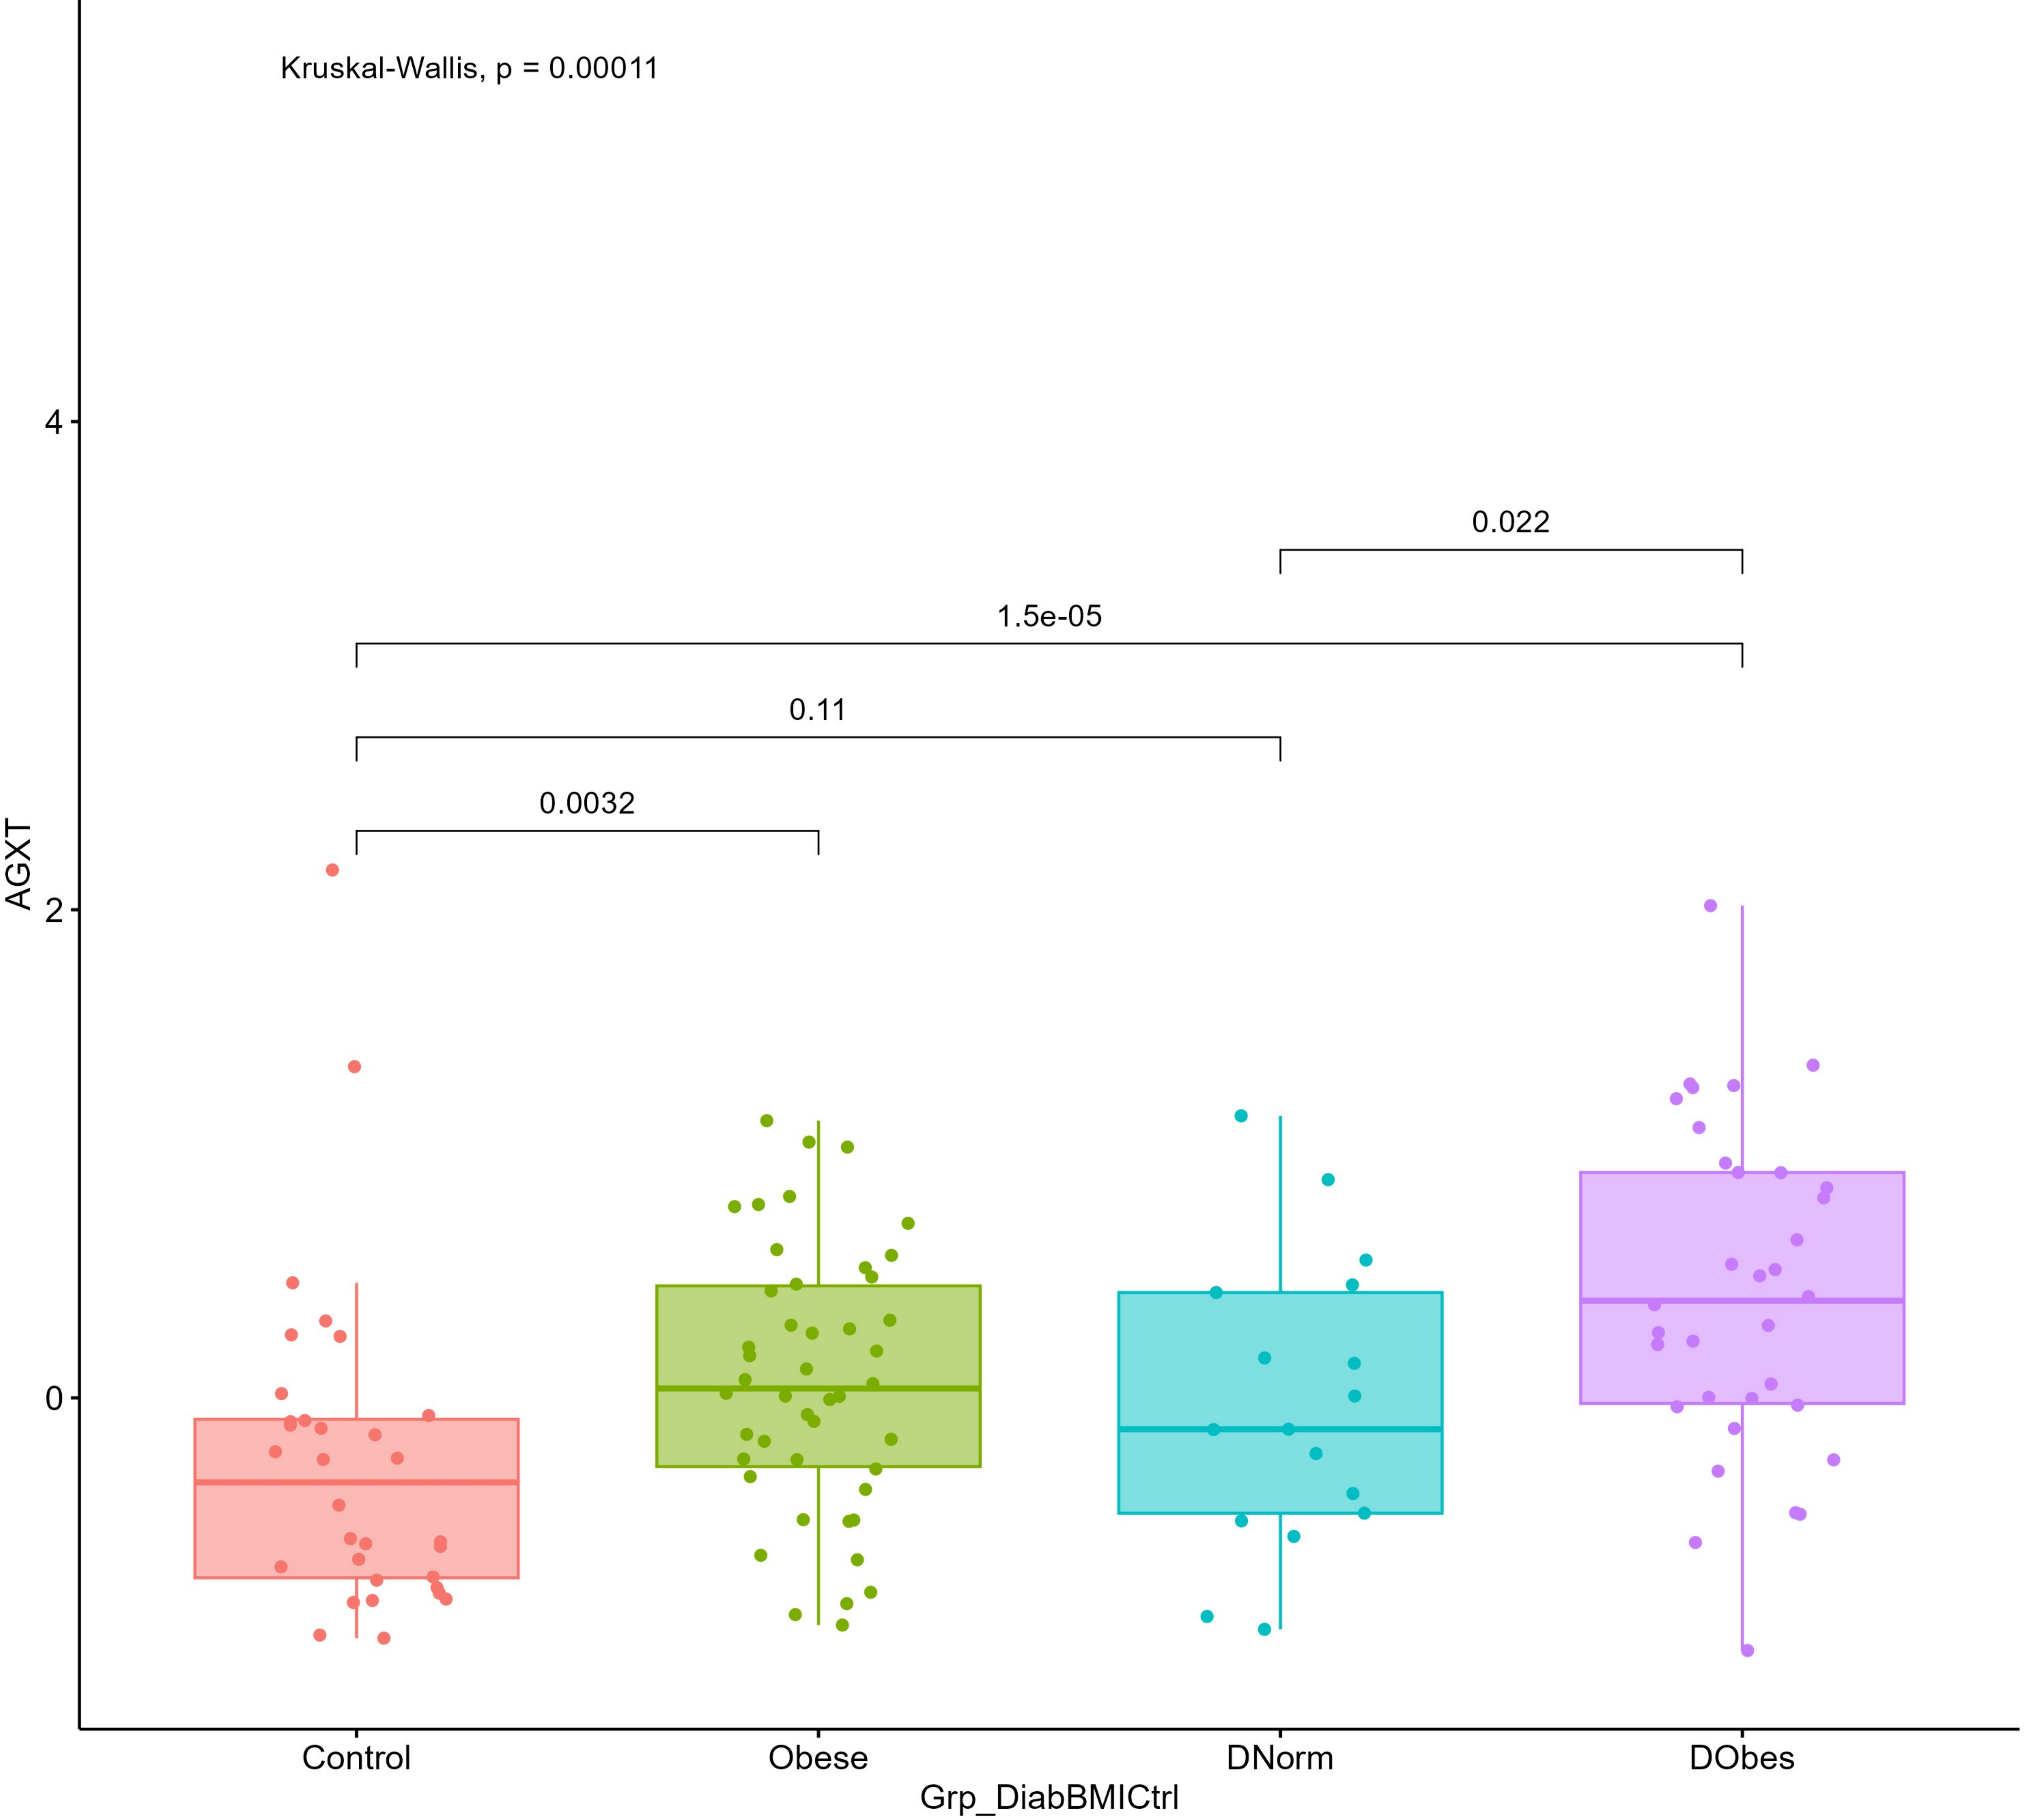

# Grp\_DiabBMICtrl

Grp\_DiabBMICtrl Control Obese DNorm DObes

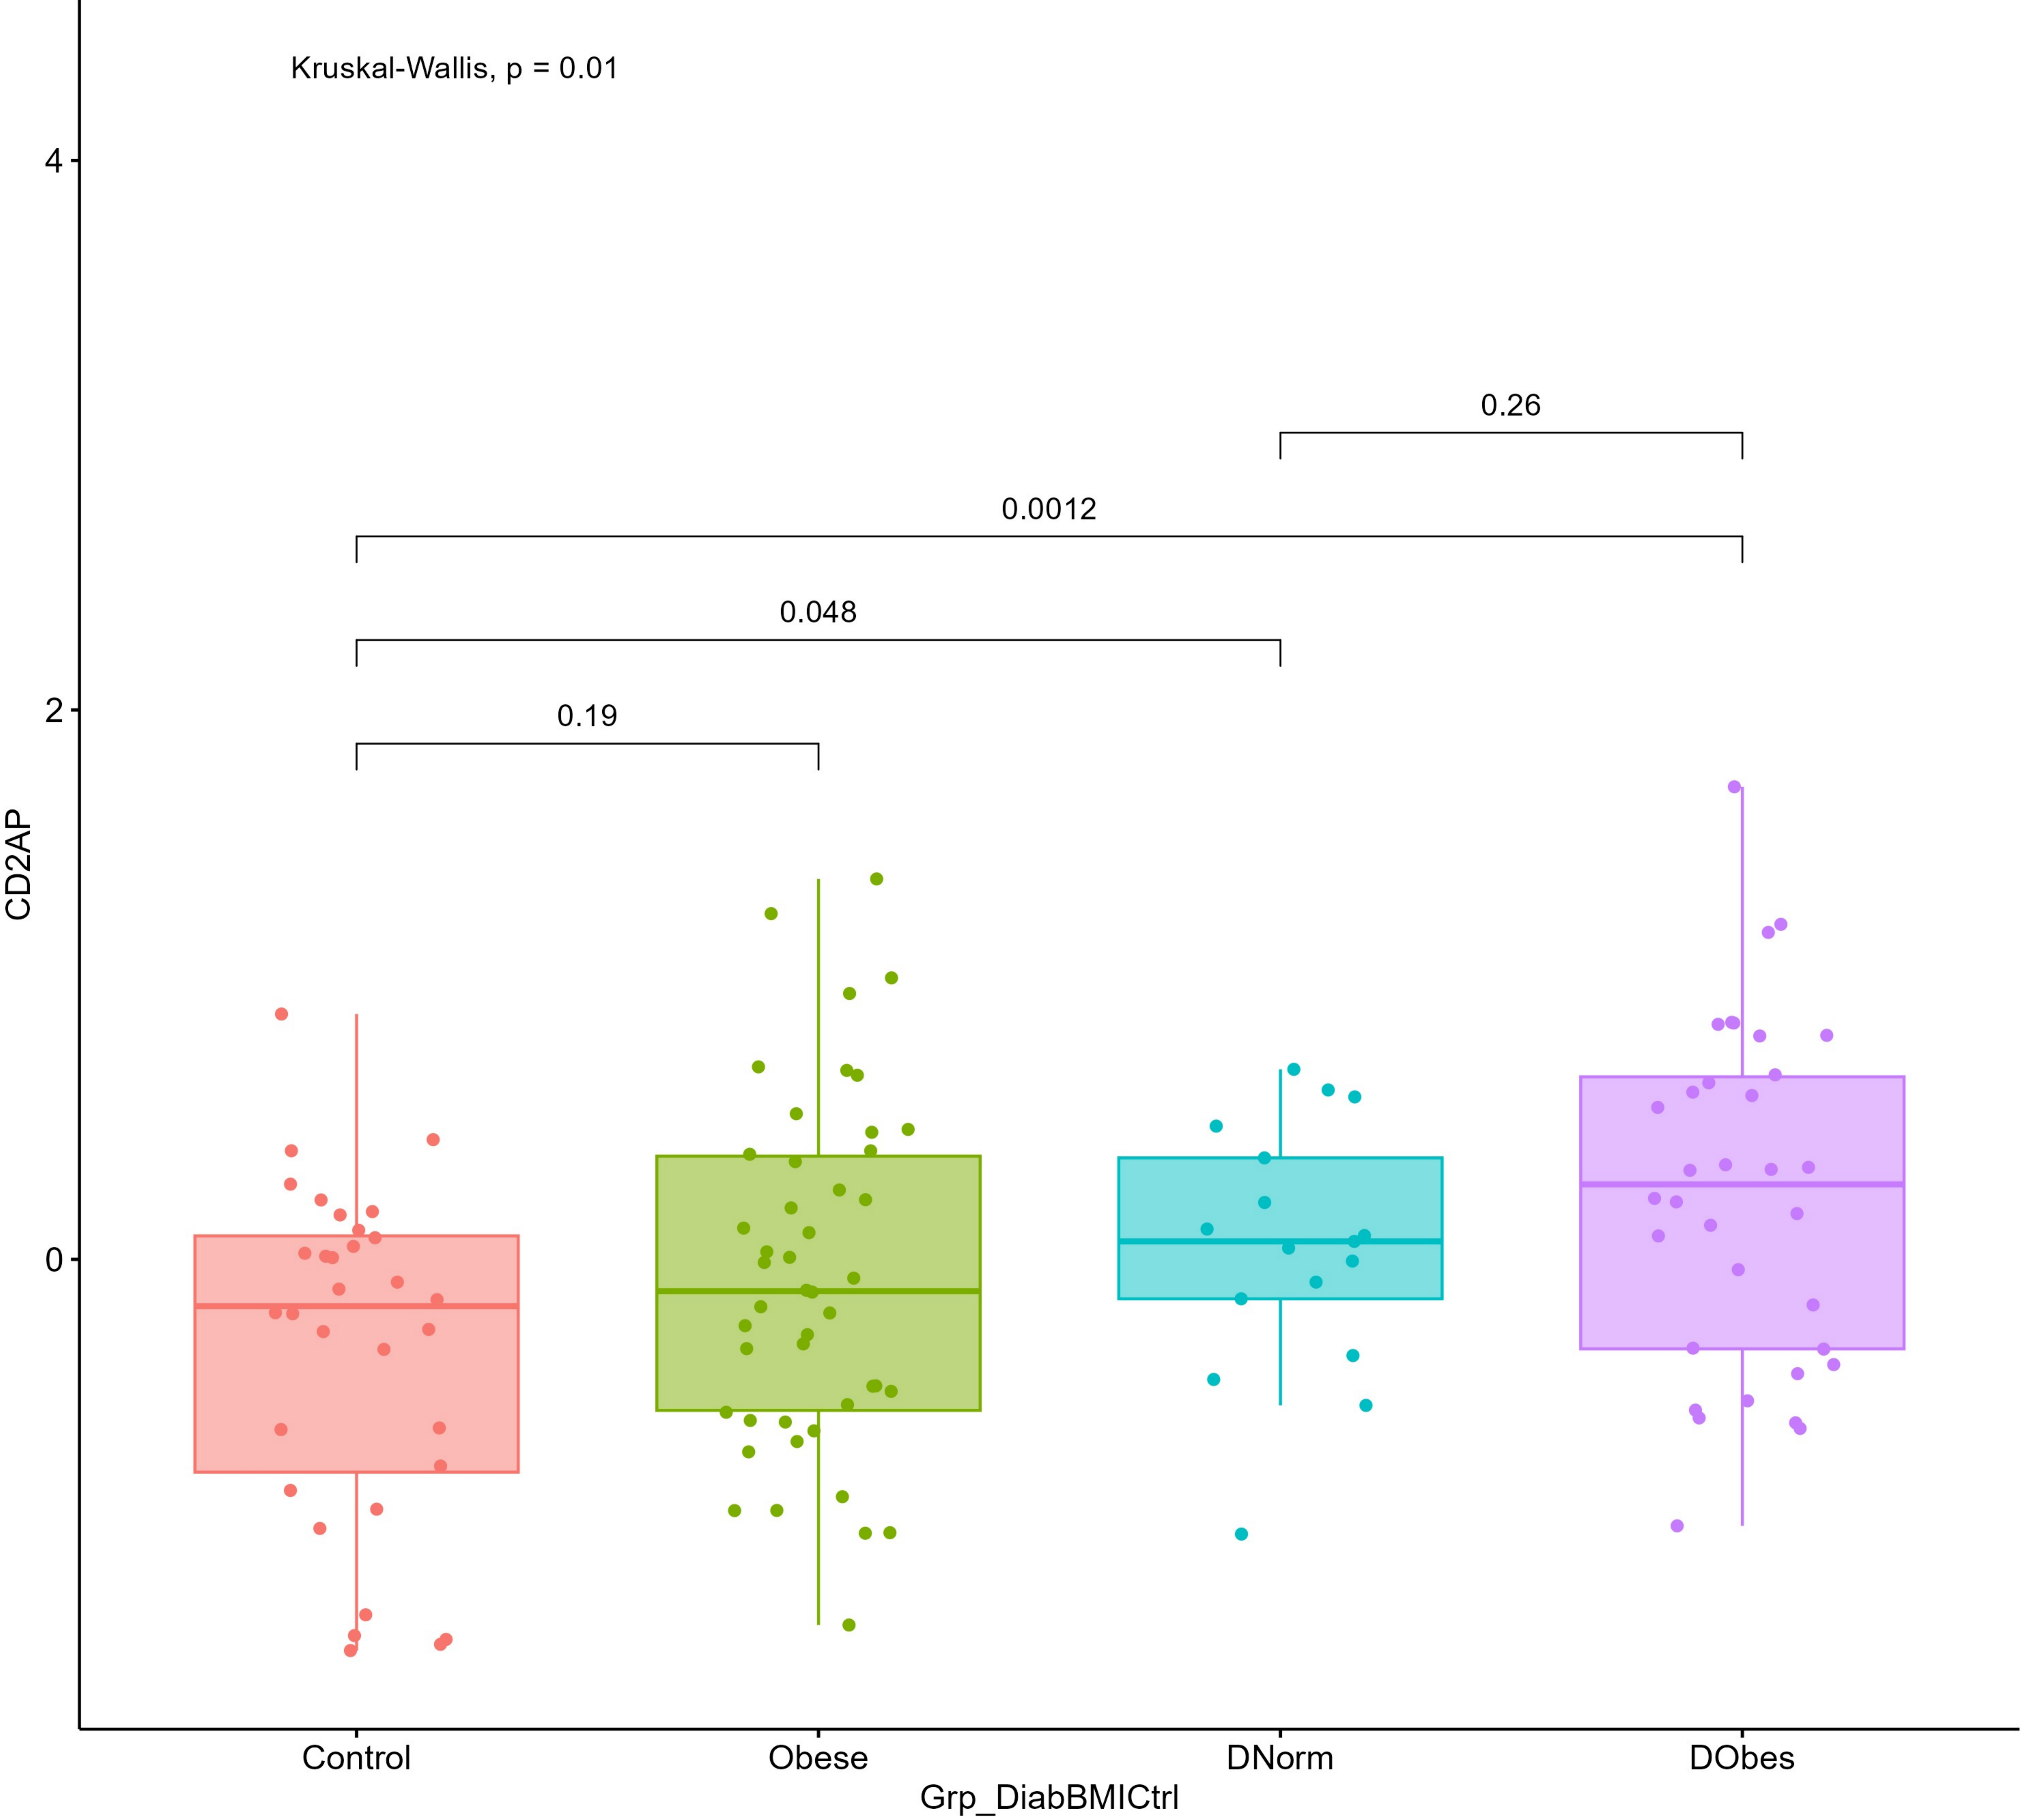

# Grp\_DiabBMICtrl

Grp\_DiabBMICtrl Control Obese DNorm DObes

Kruskal-Wallis, p = 0.0069

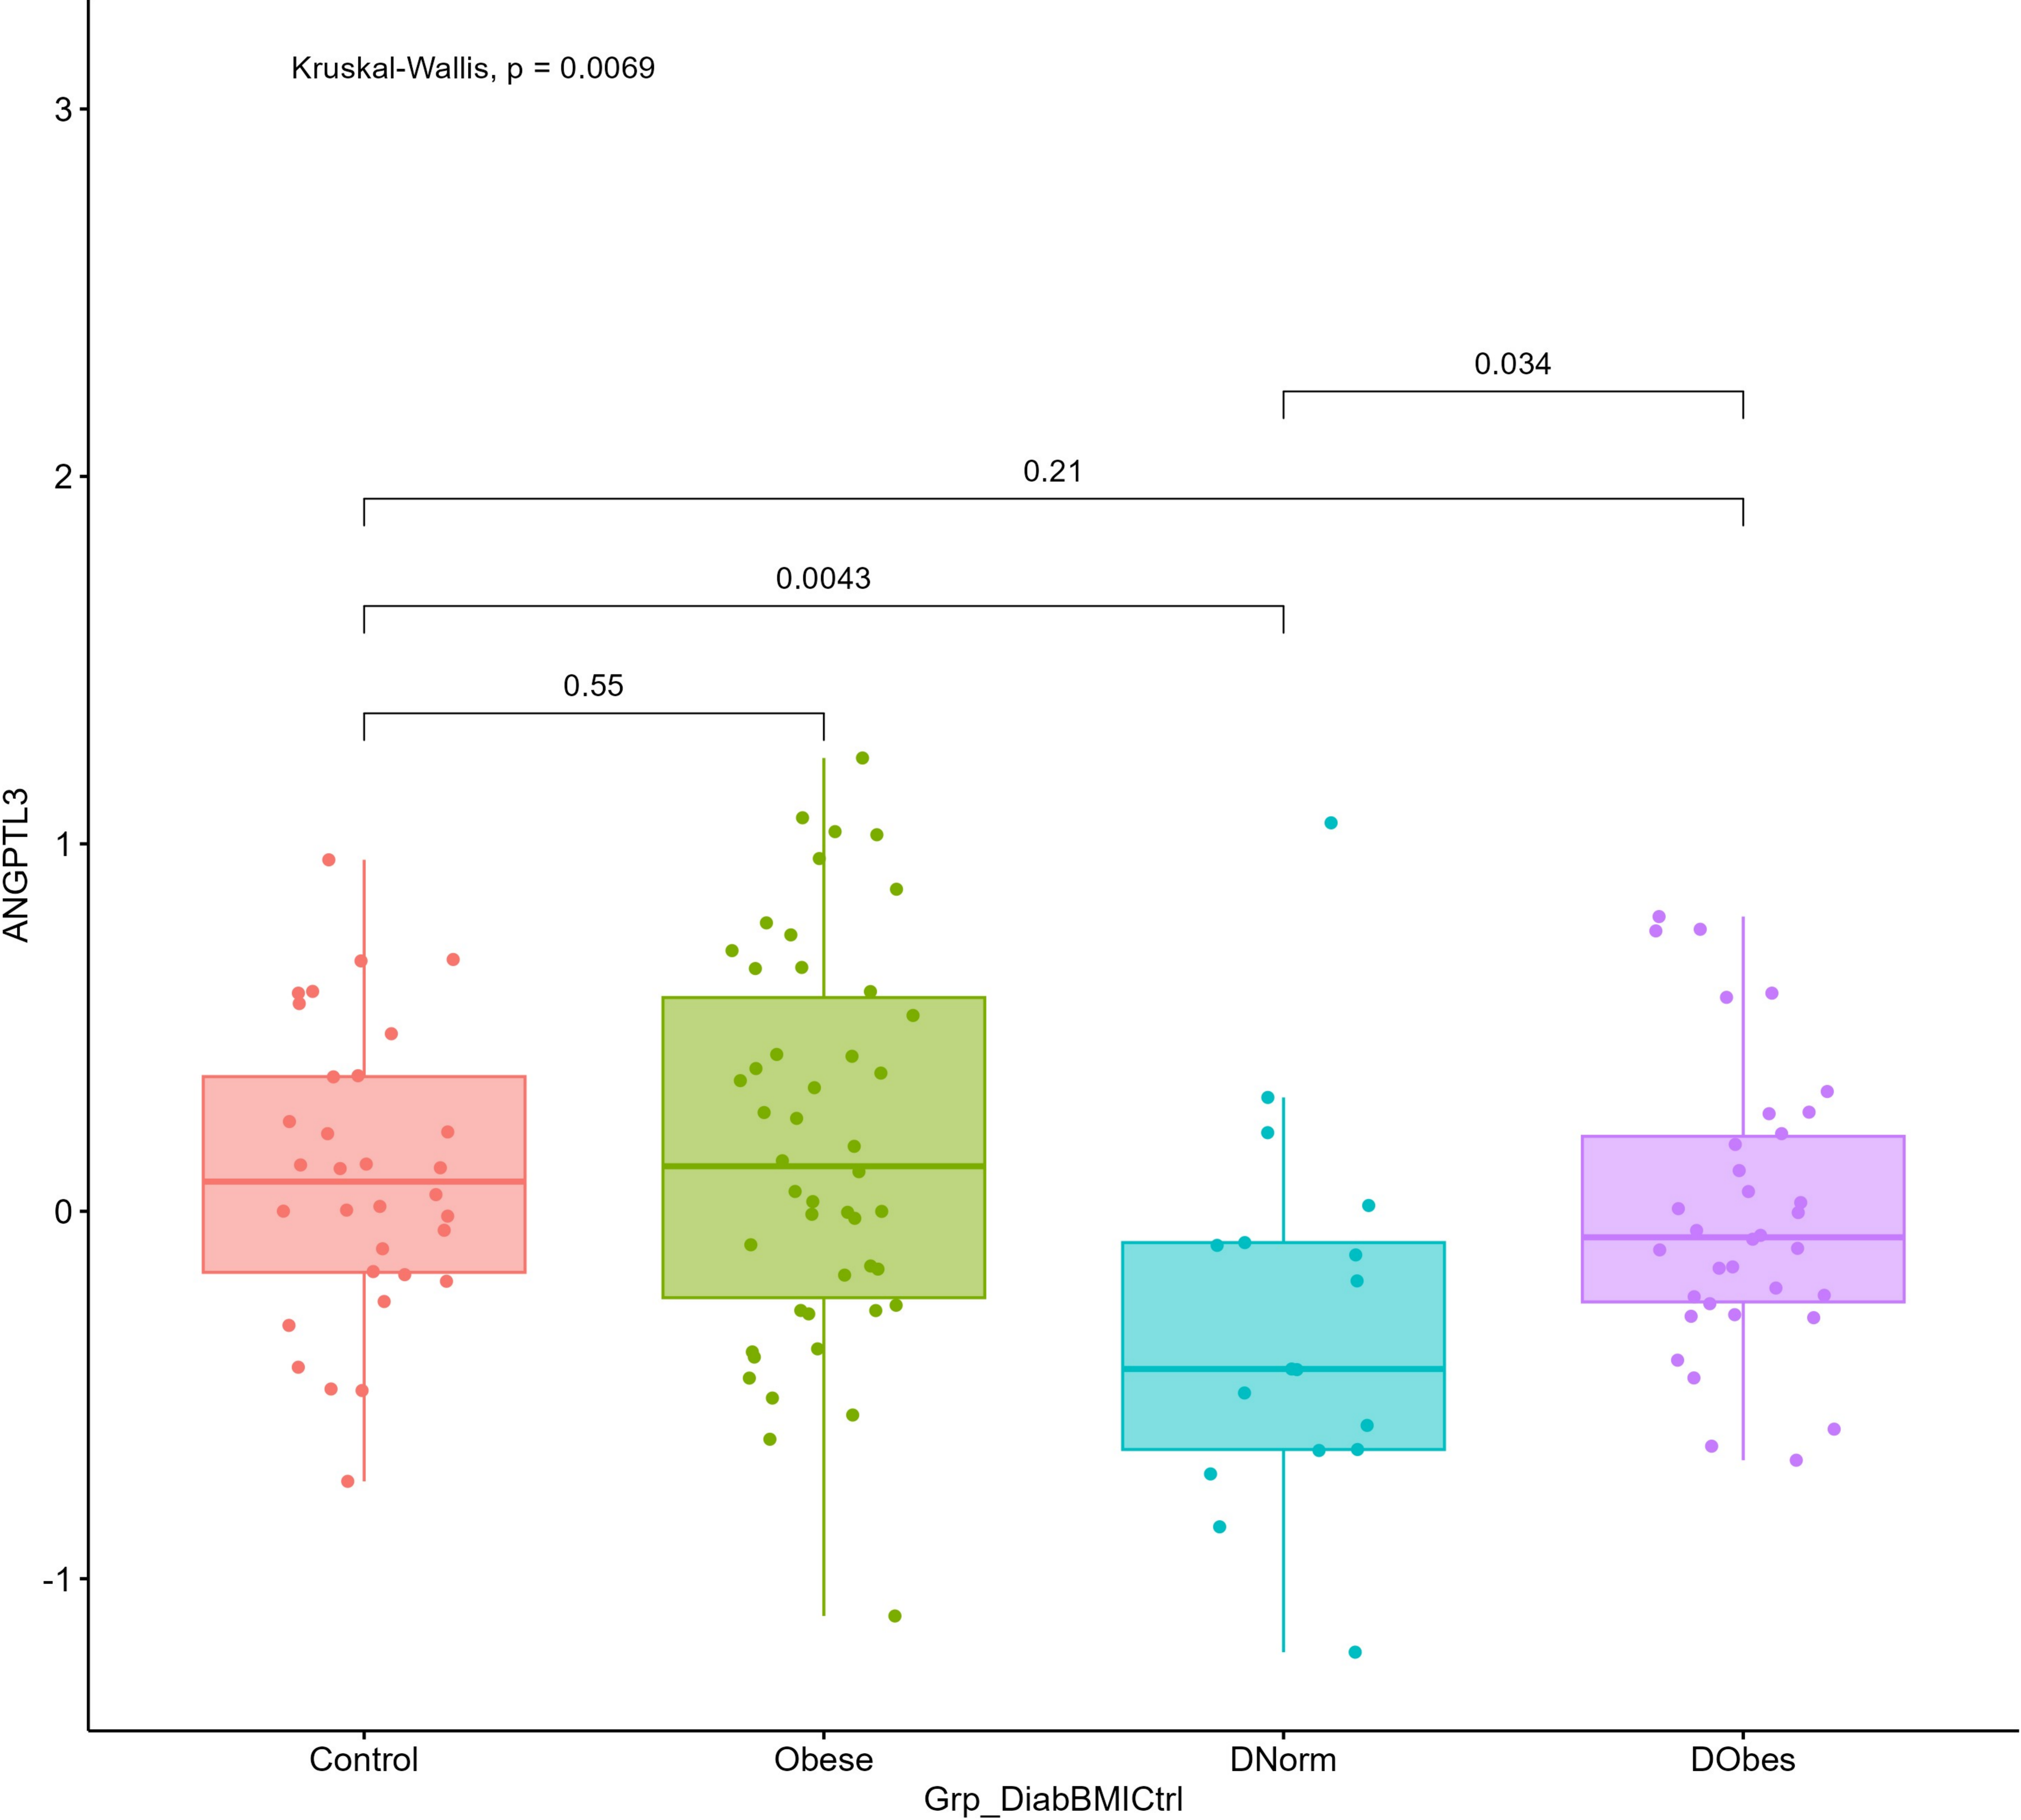

# Grp\_DiabBMICtrl

Grp\_DiabBMICtrl Control Obese DNorm DObes

Kruskal-Wallis, p = 0.013

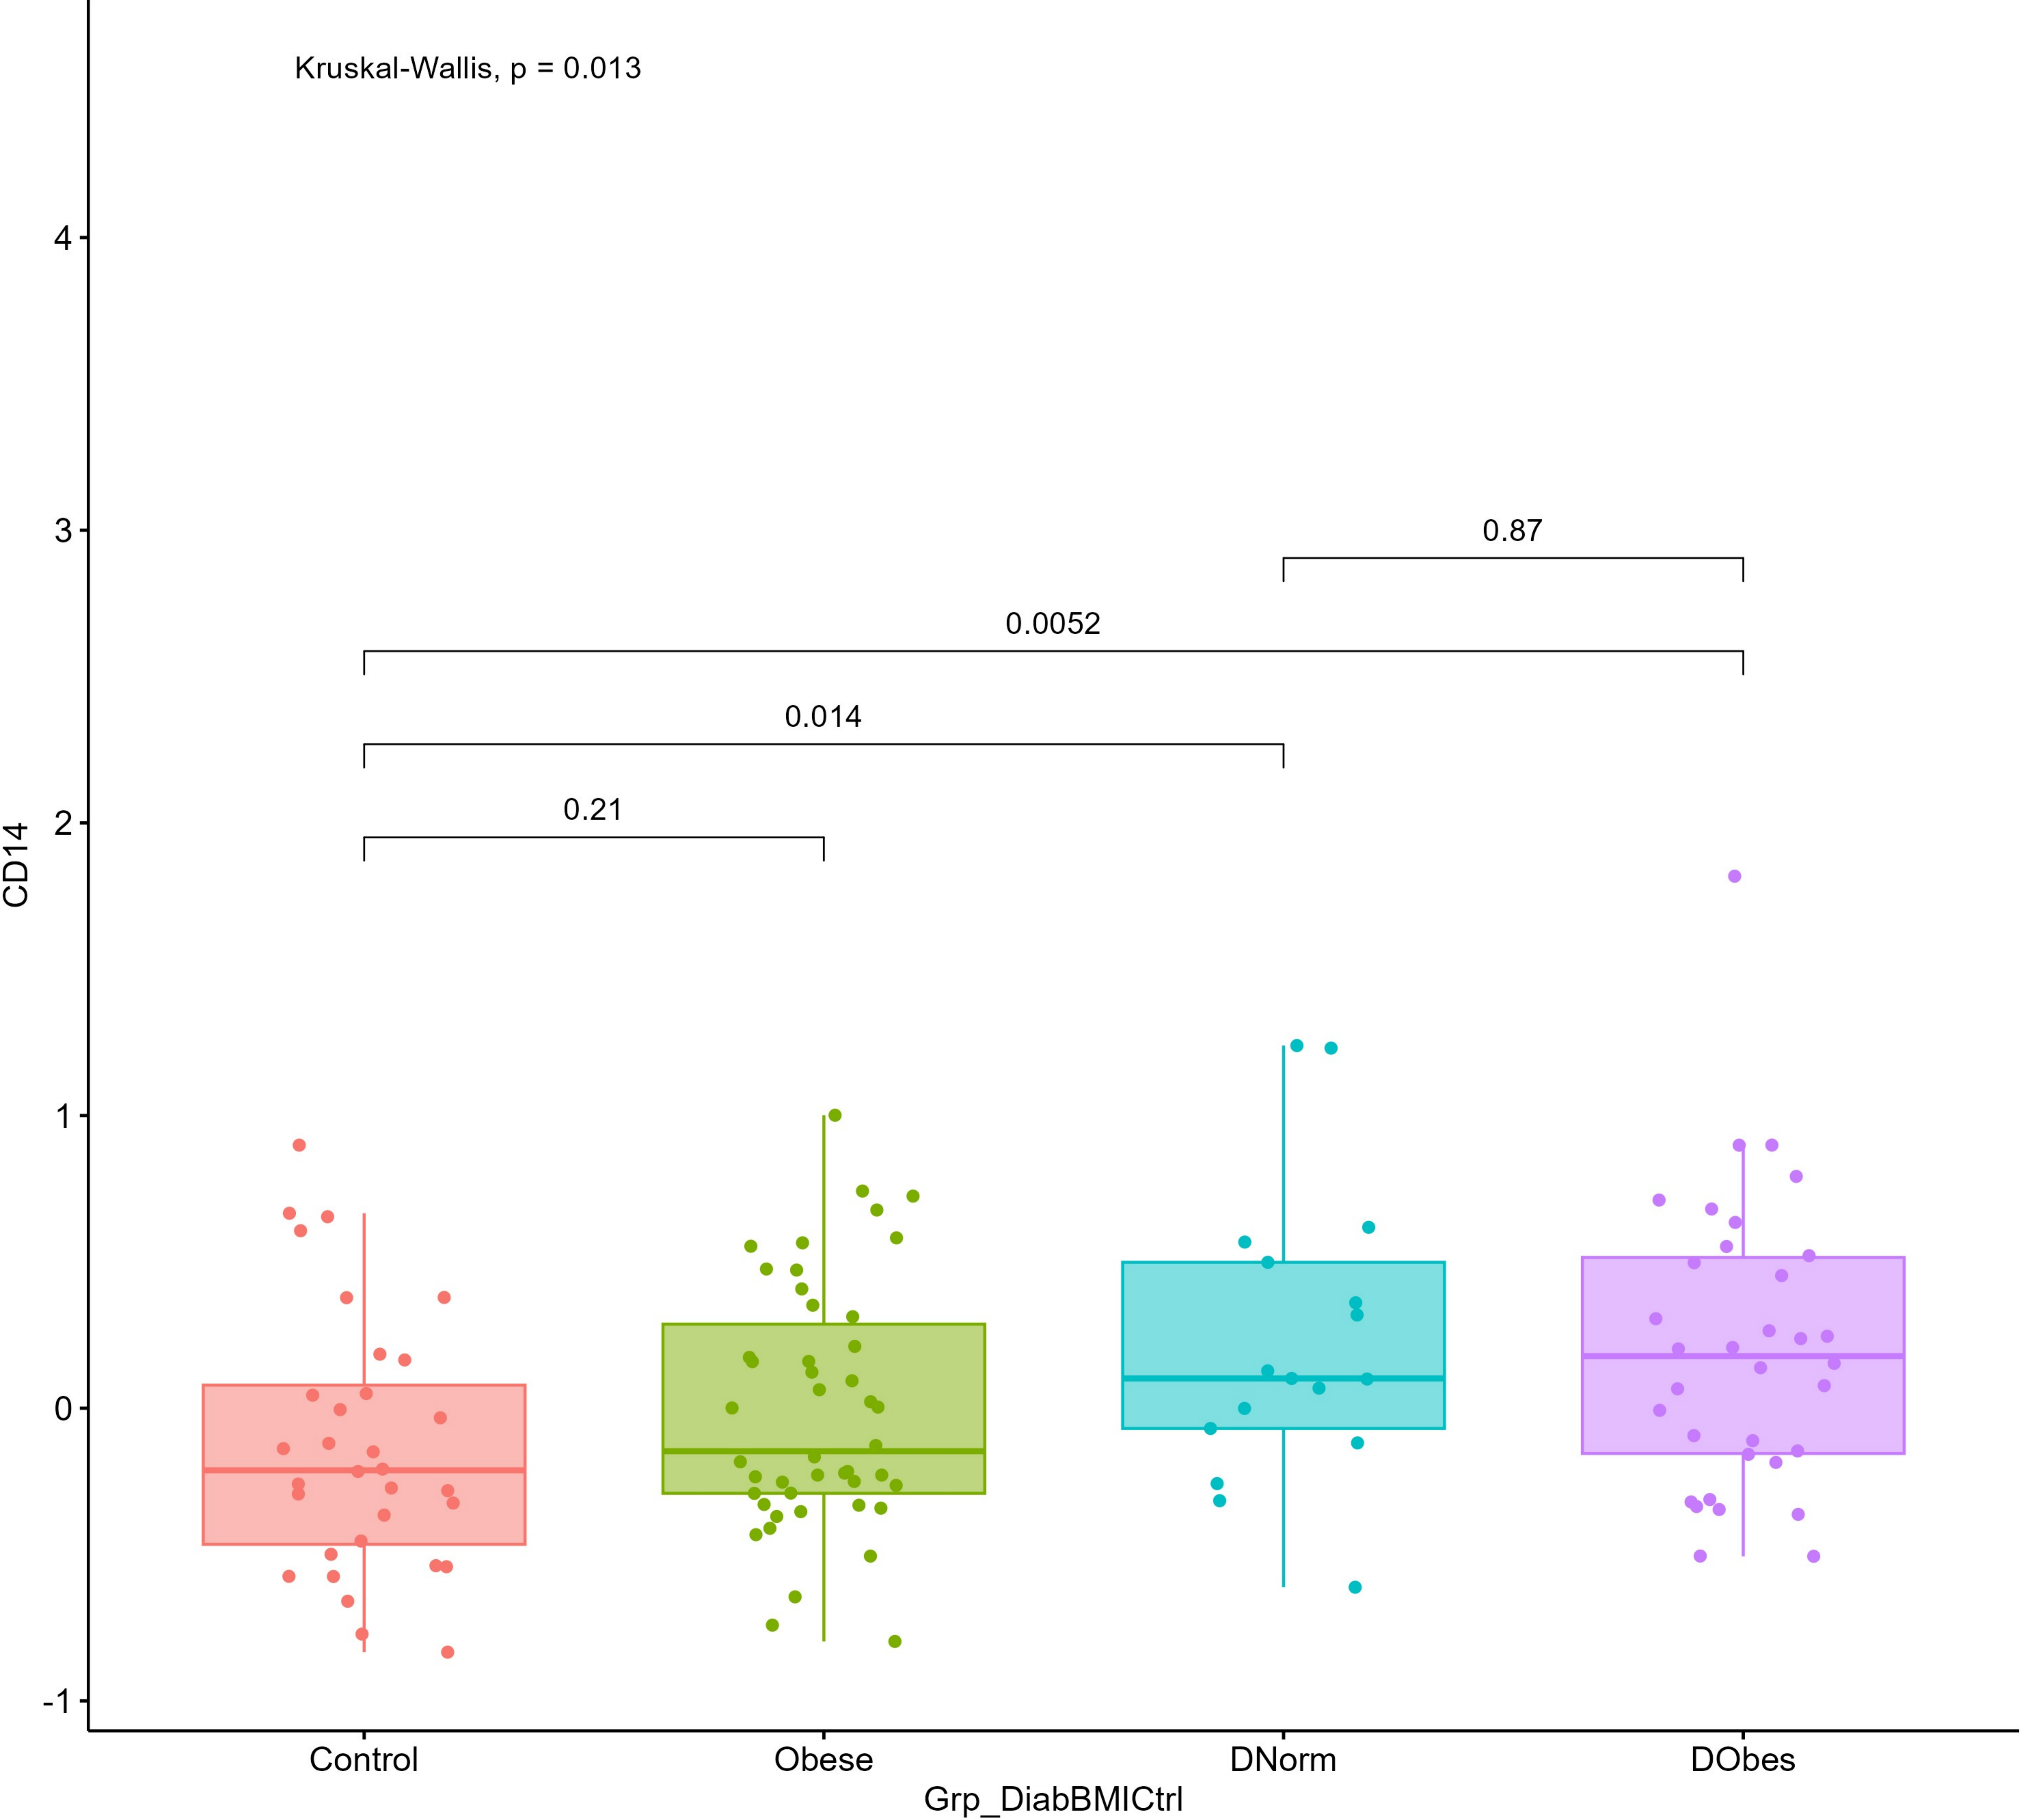

# Grp\_DiabBMICtrl

Grp\_DiabBMICtrl Control Obese DNorm DObes

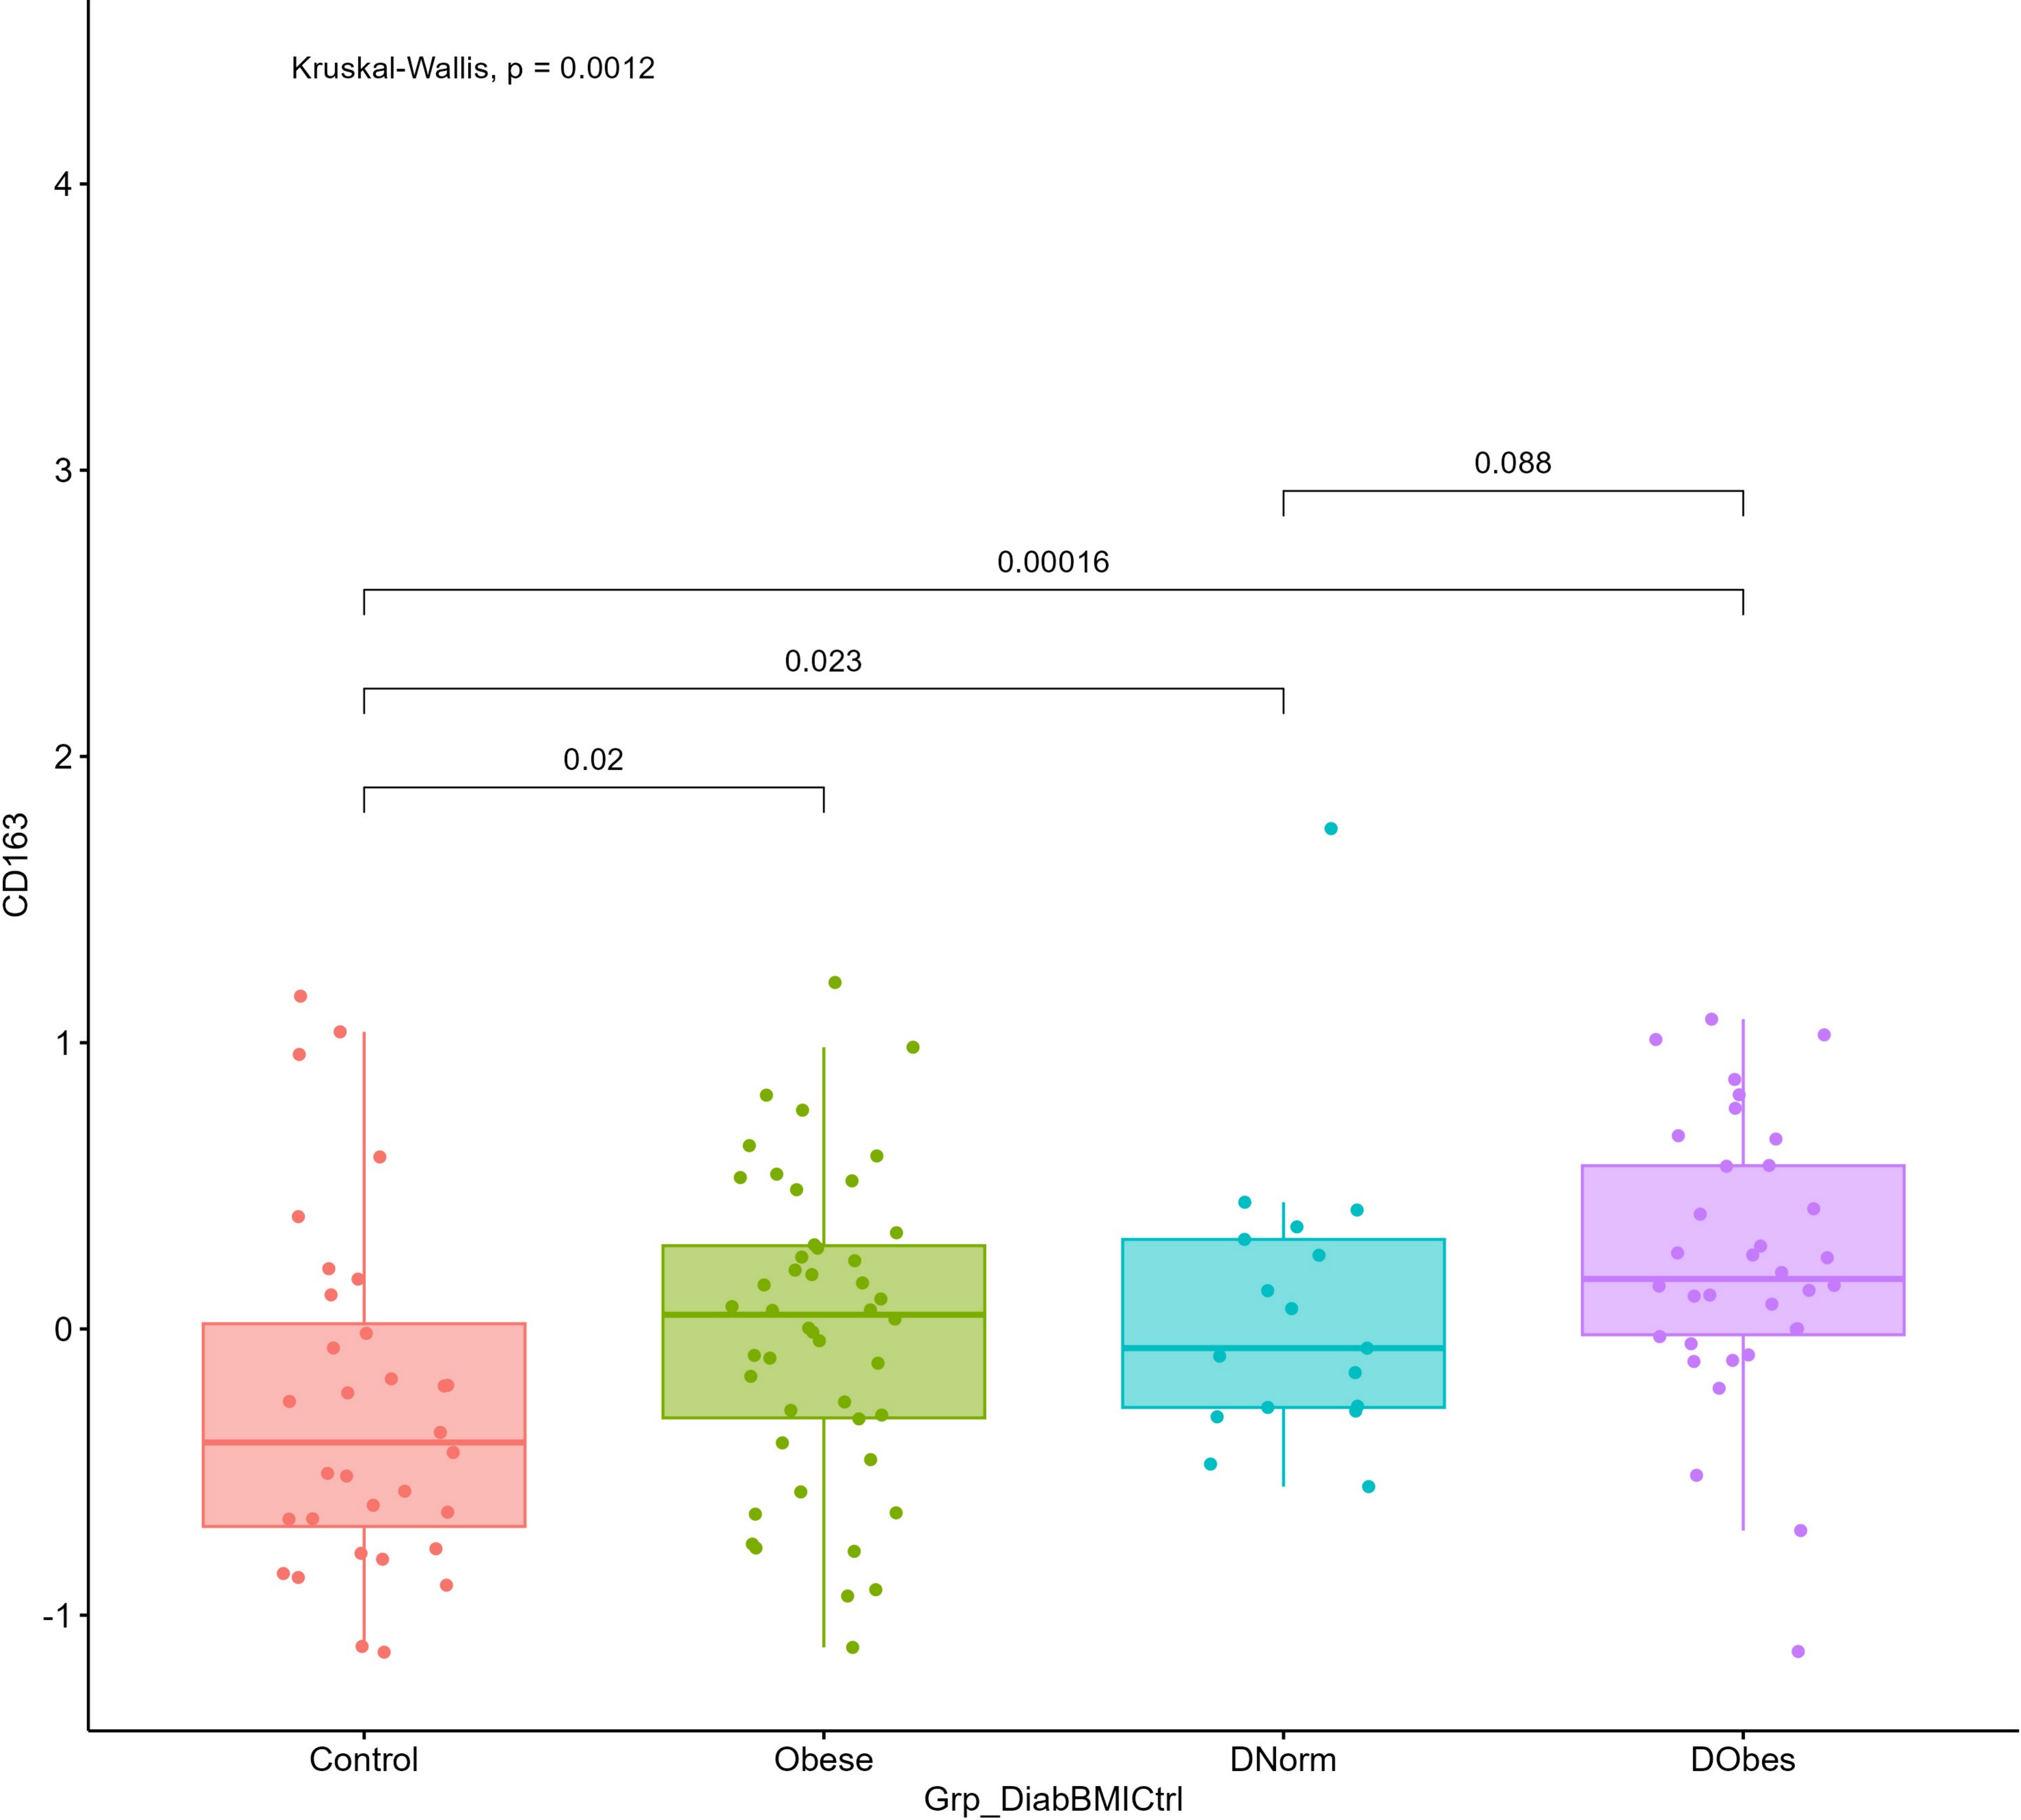

# Grp\_DiabBMICtrl

Grp\_DiabBMICtrl Control Obese DNorm DObes

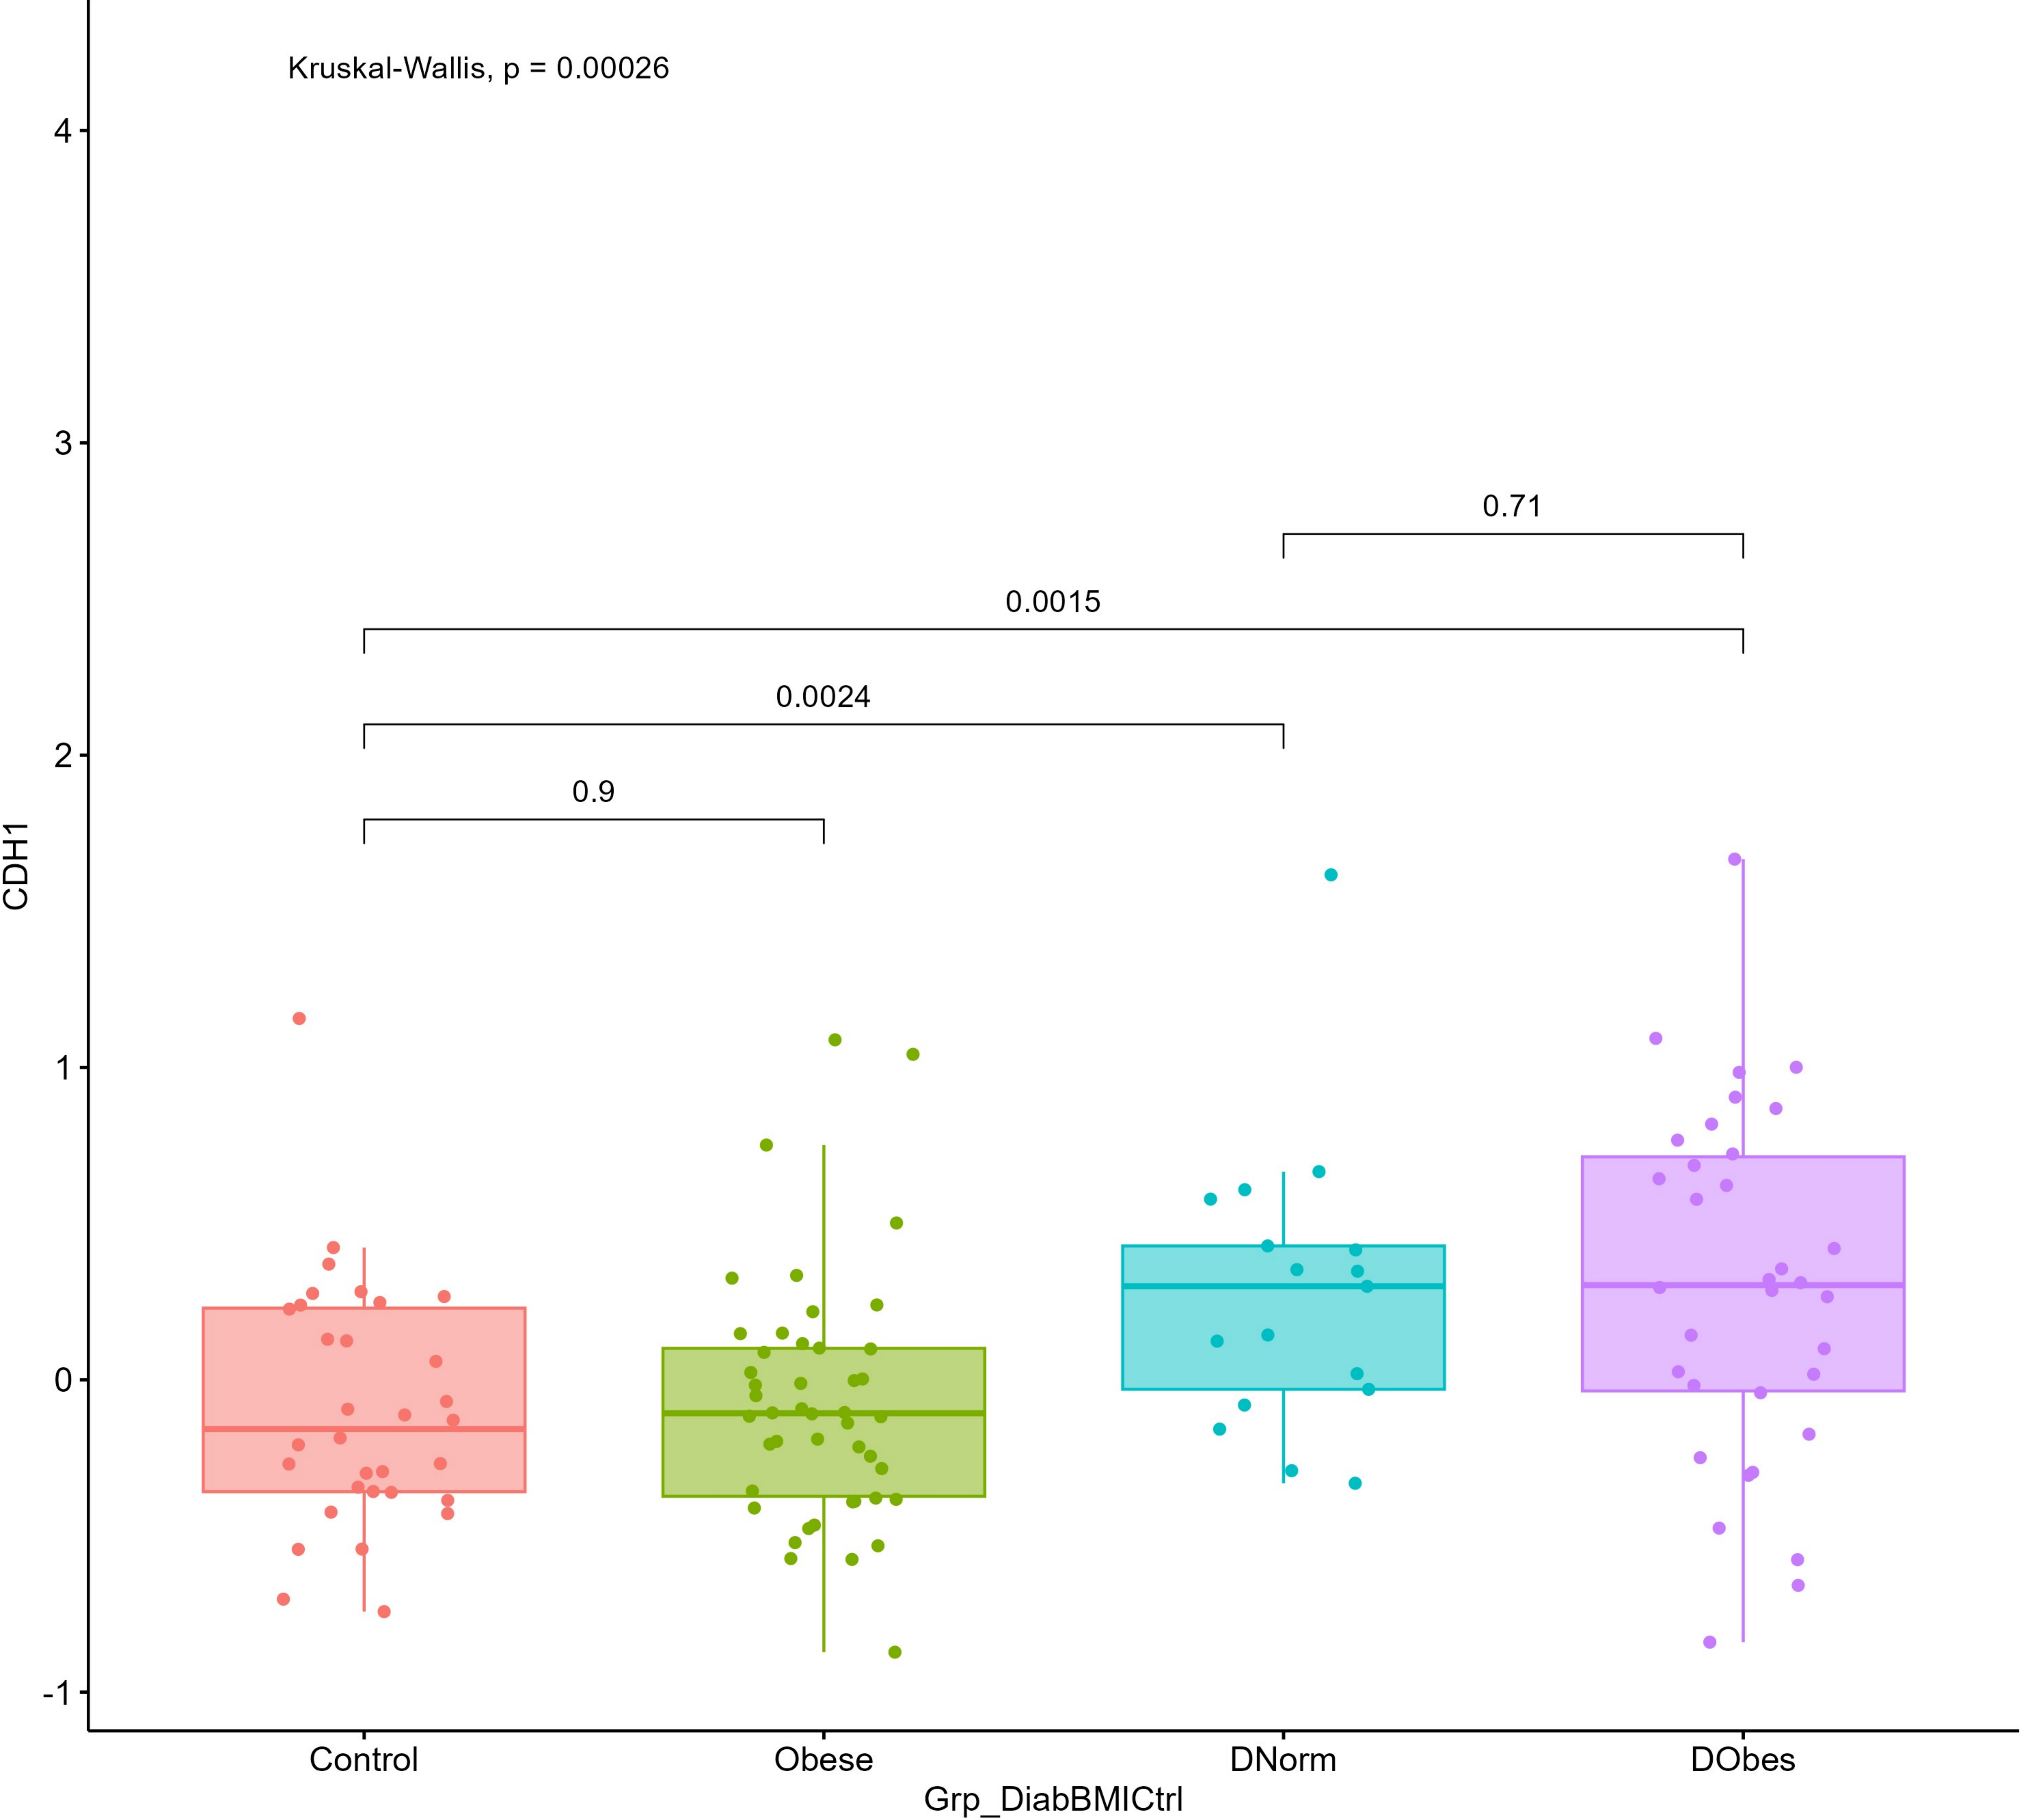

# Grp\_DiabBMICtrl

Grp\_DiabBMICtrl Control Obese DNorm DObes

Kruskal-Wallis, p = 0.0018

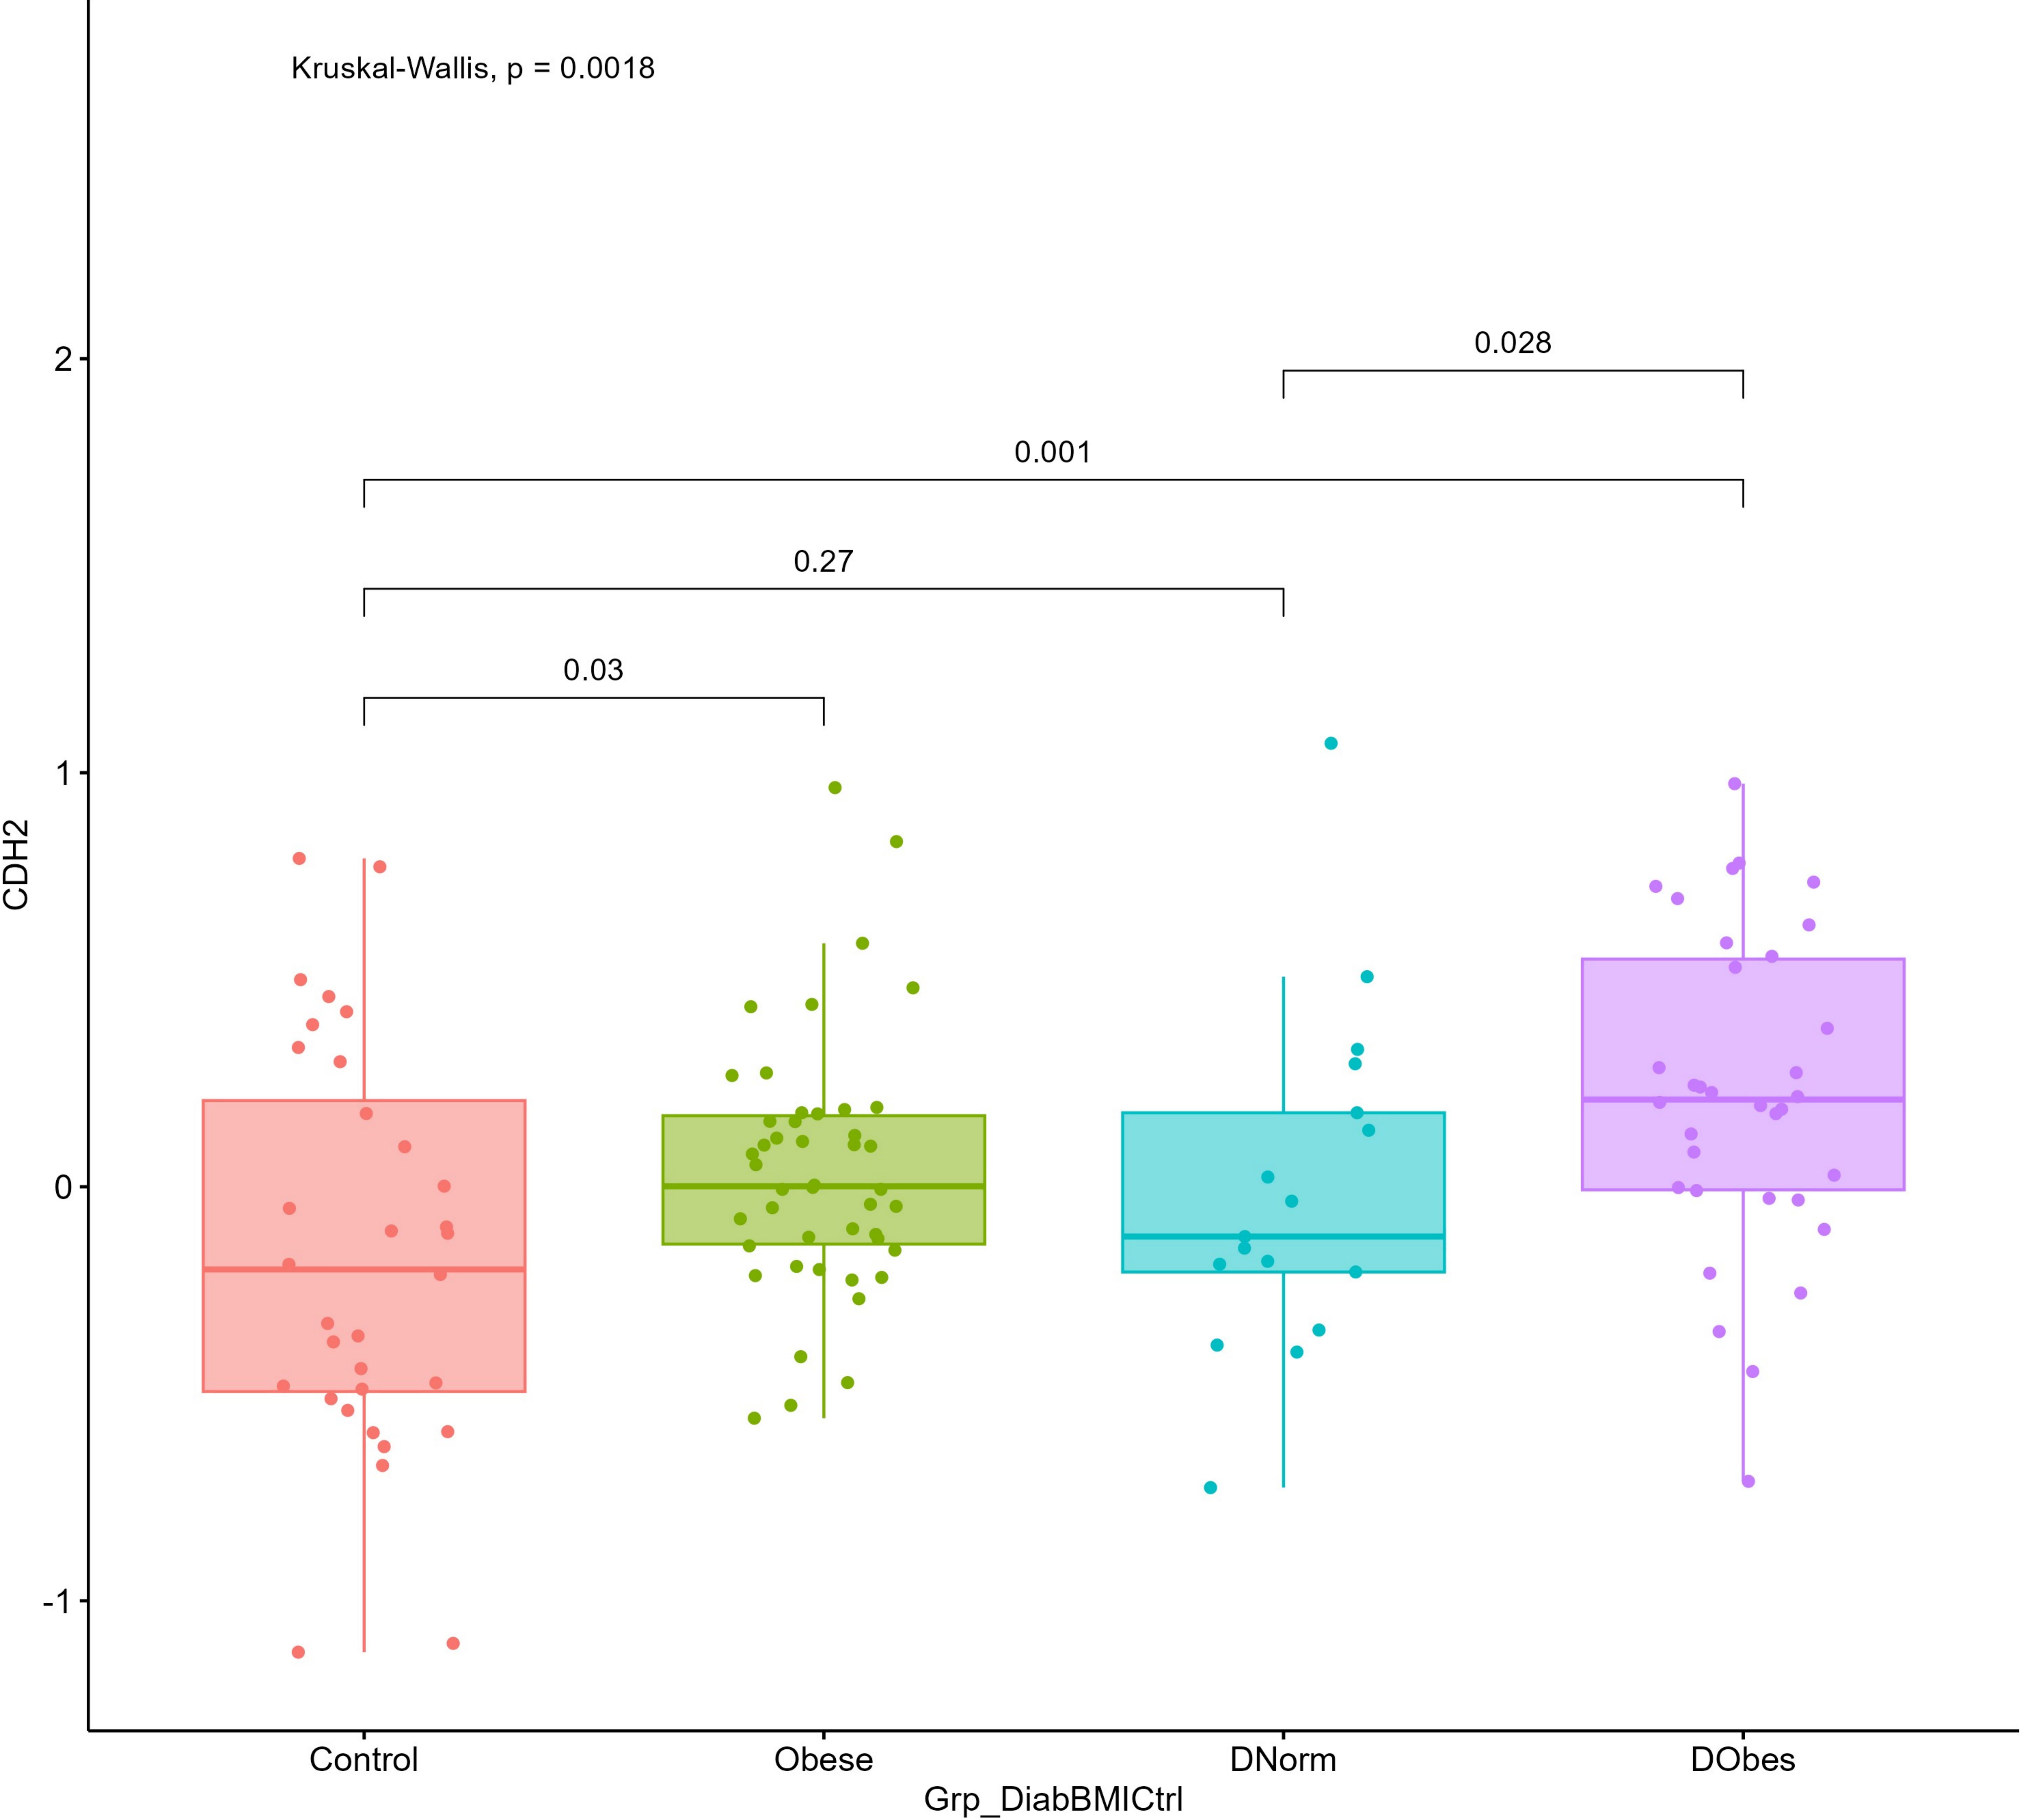

# Grp\_DiabBMICtrl

Grp\_DiabBMICtrl Control Obese DNorm DObes

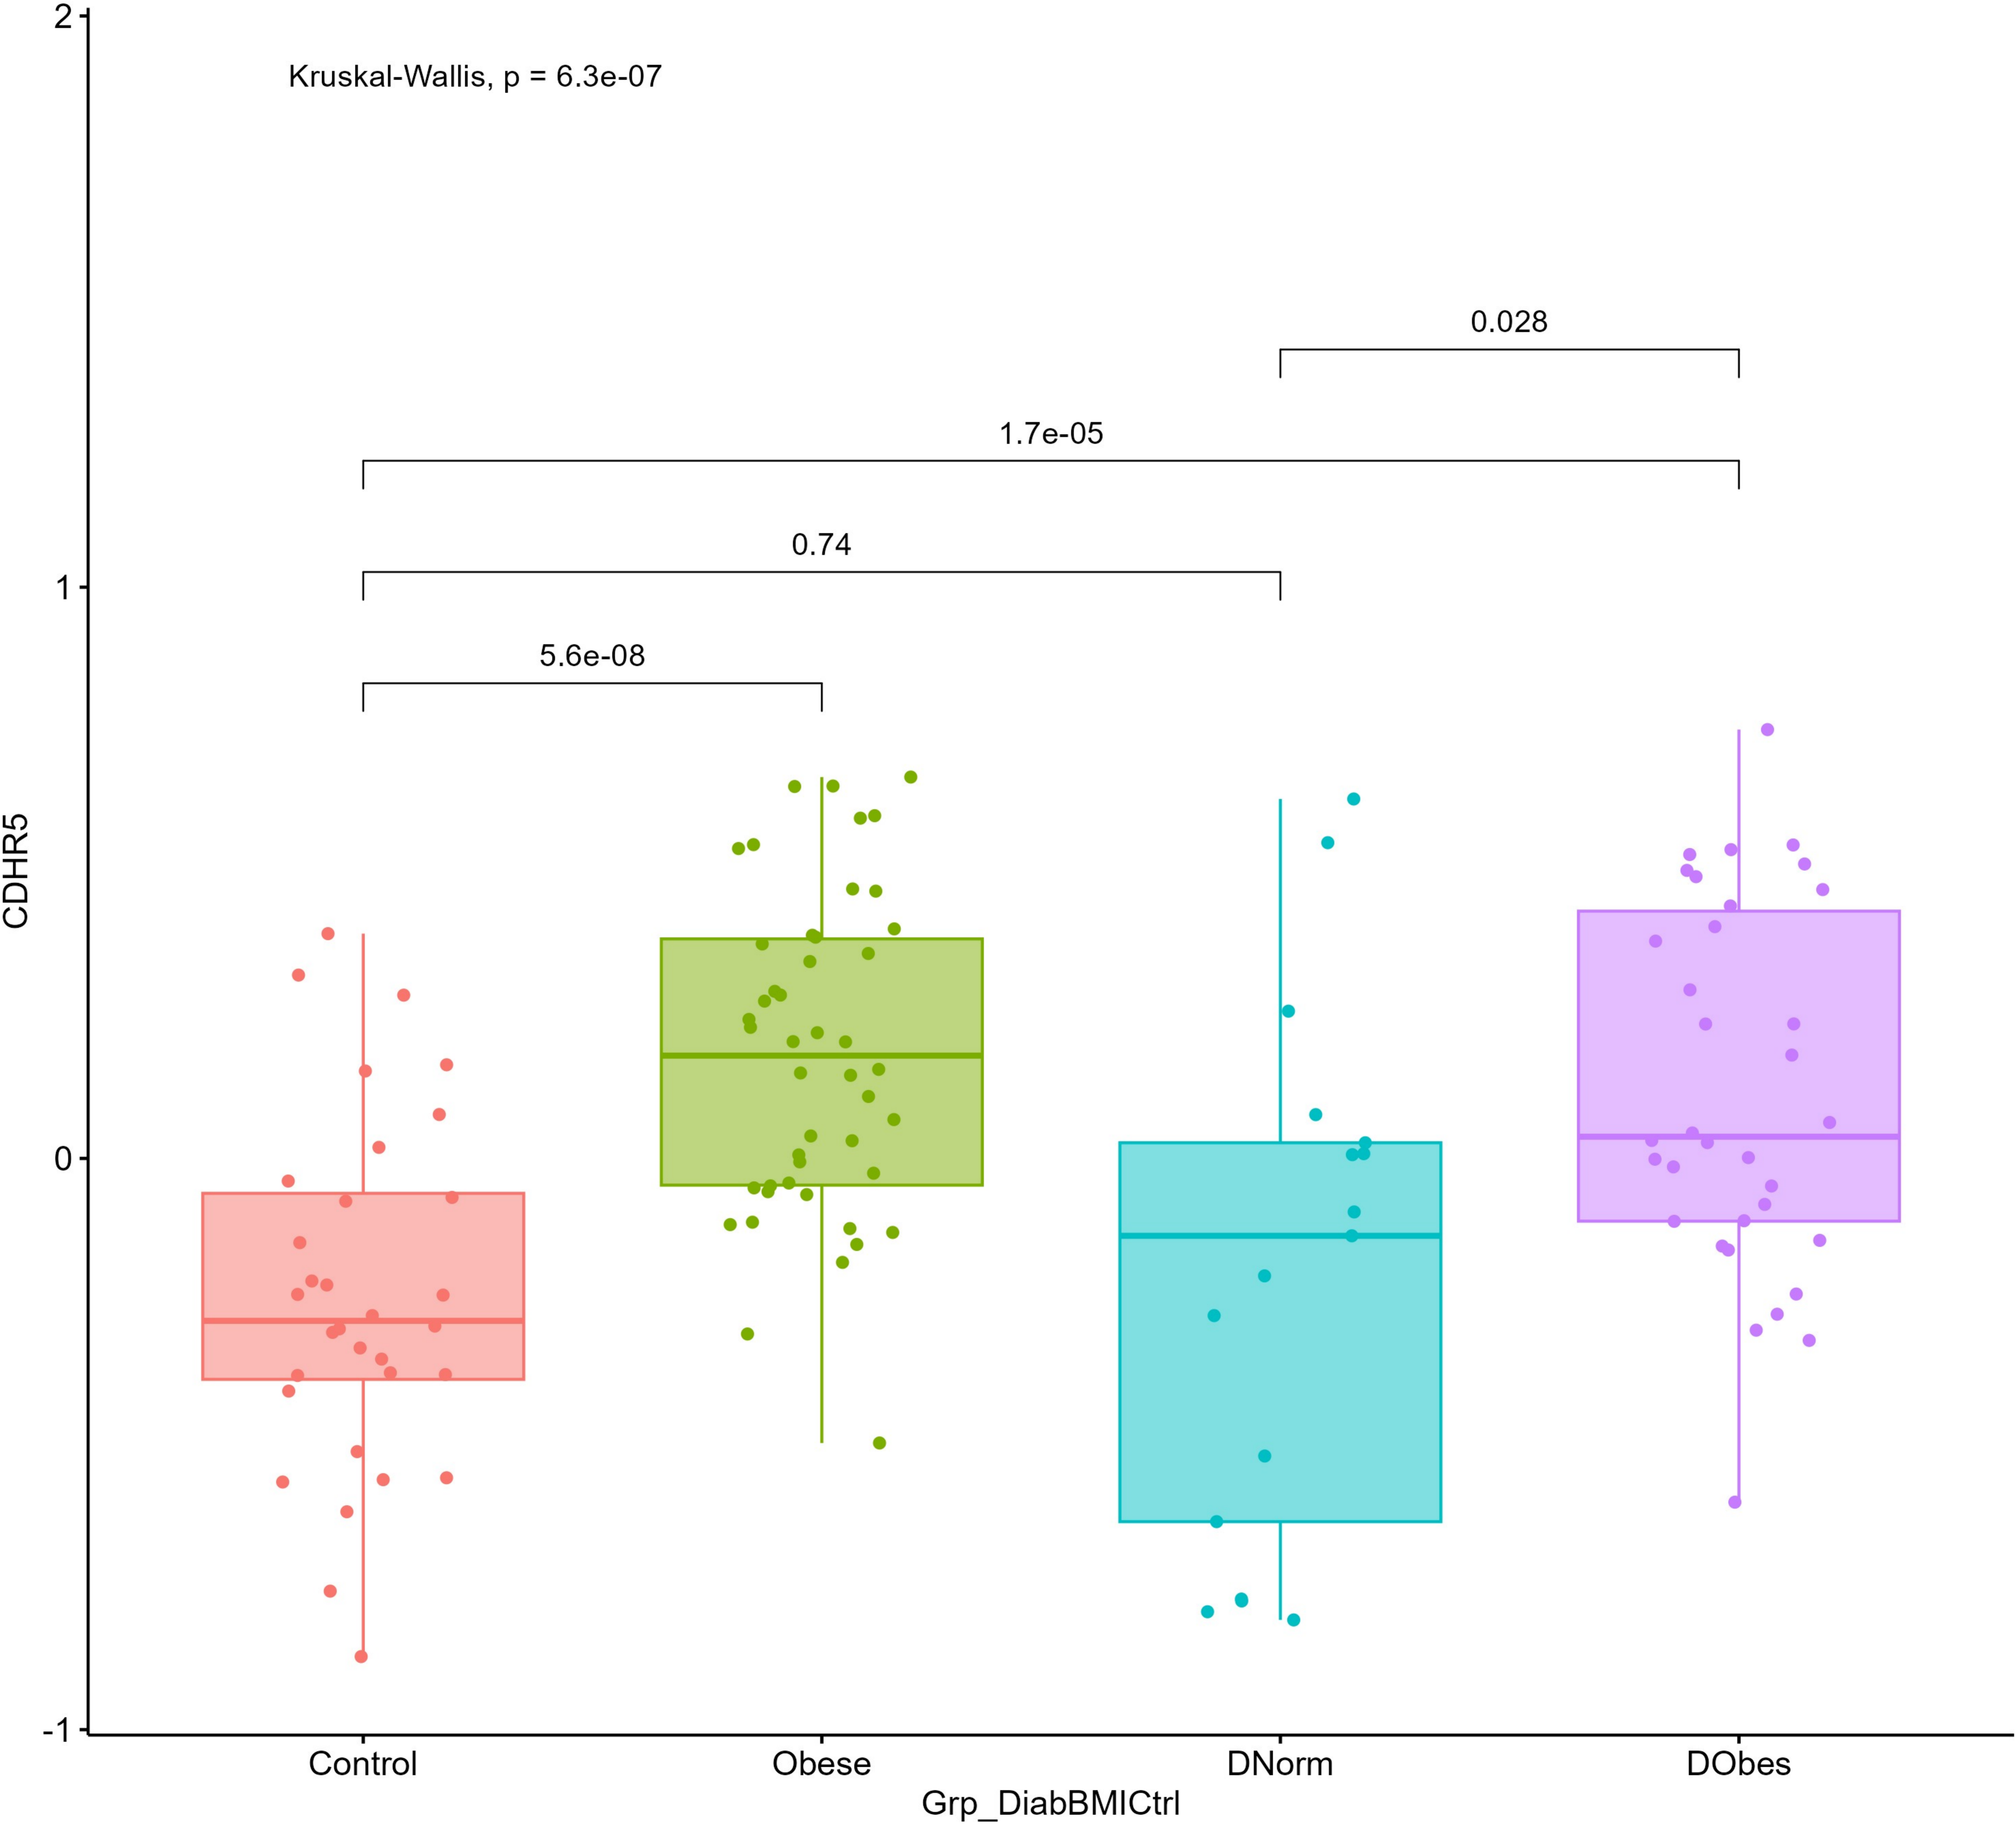

# Grp\_DiabBMICtrl

Grp\_DiabBMICtrl Control Obese DNorm DObes

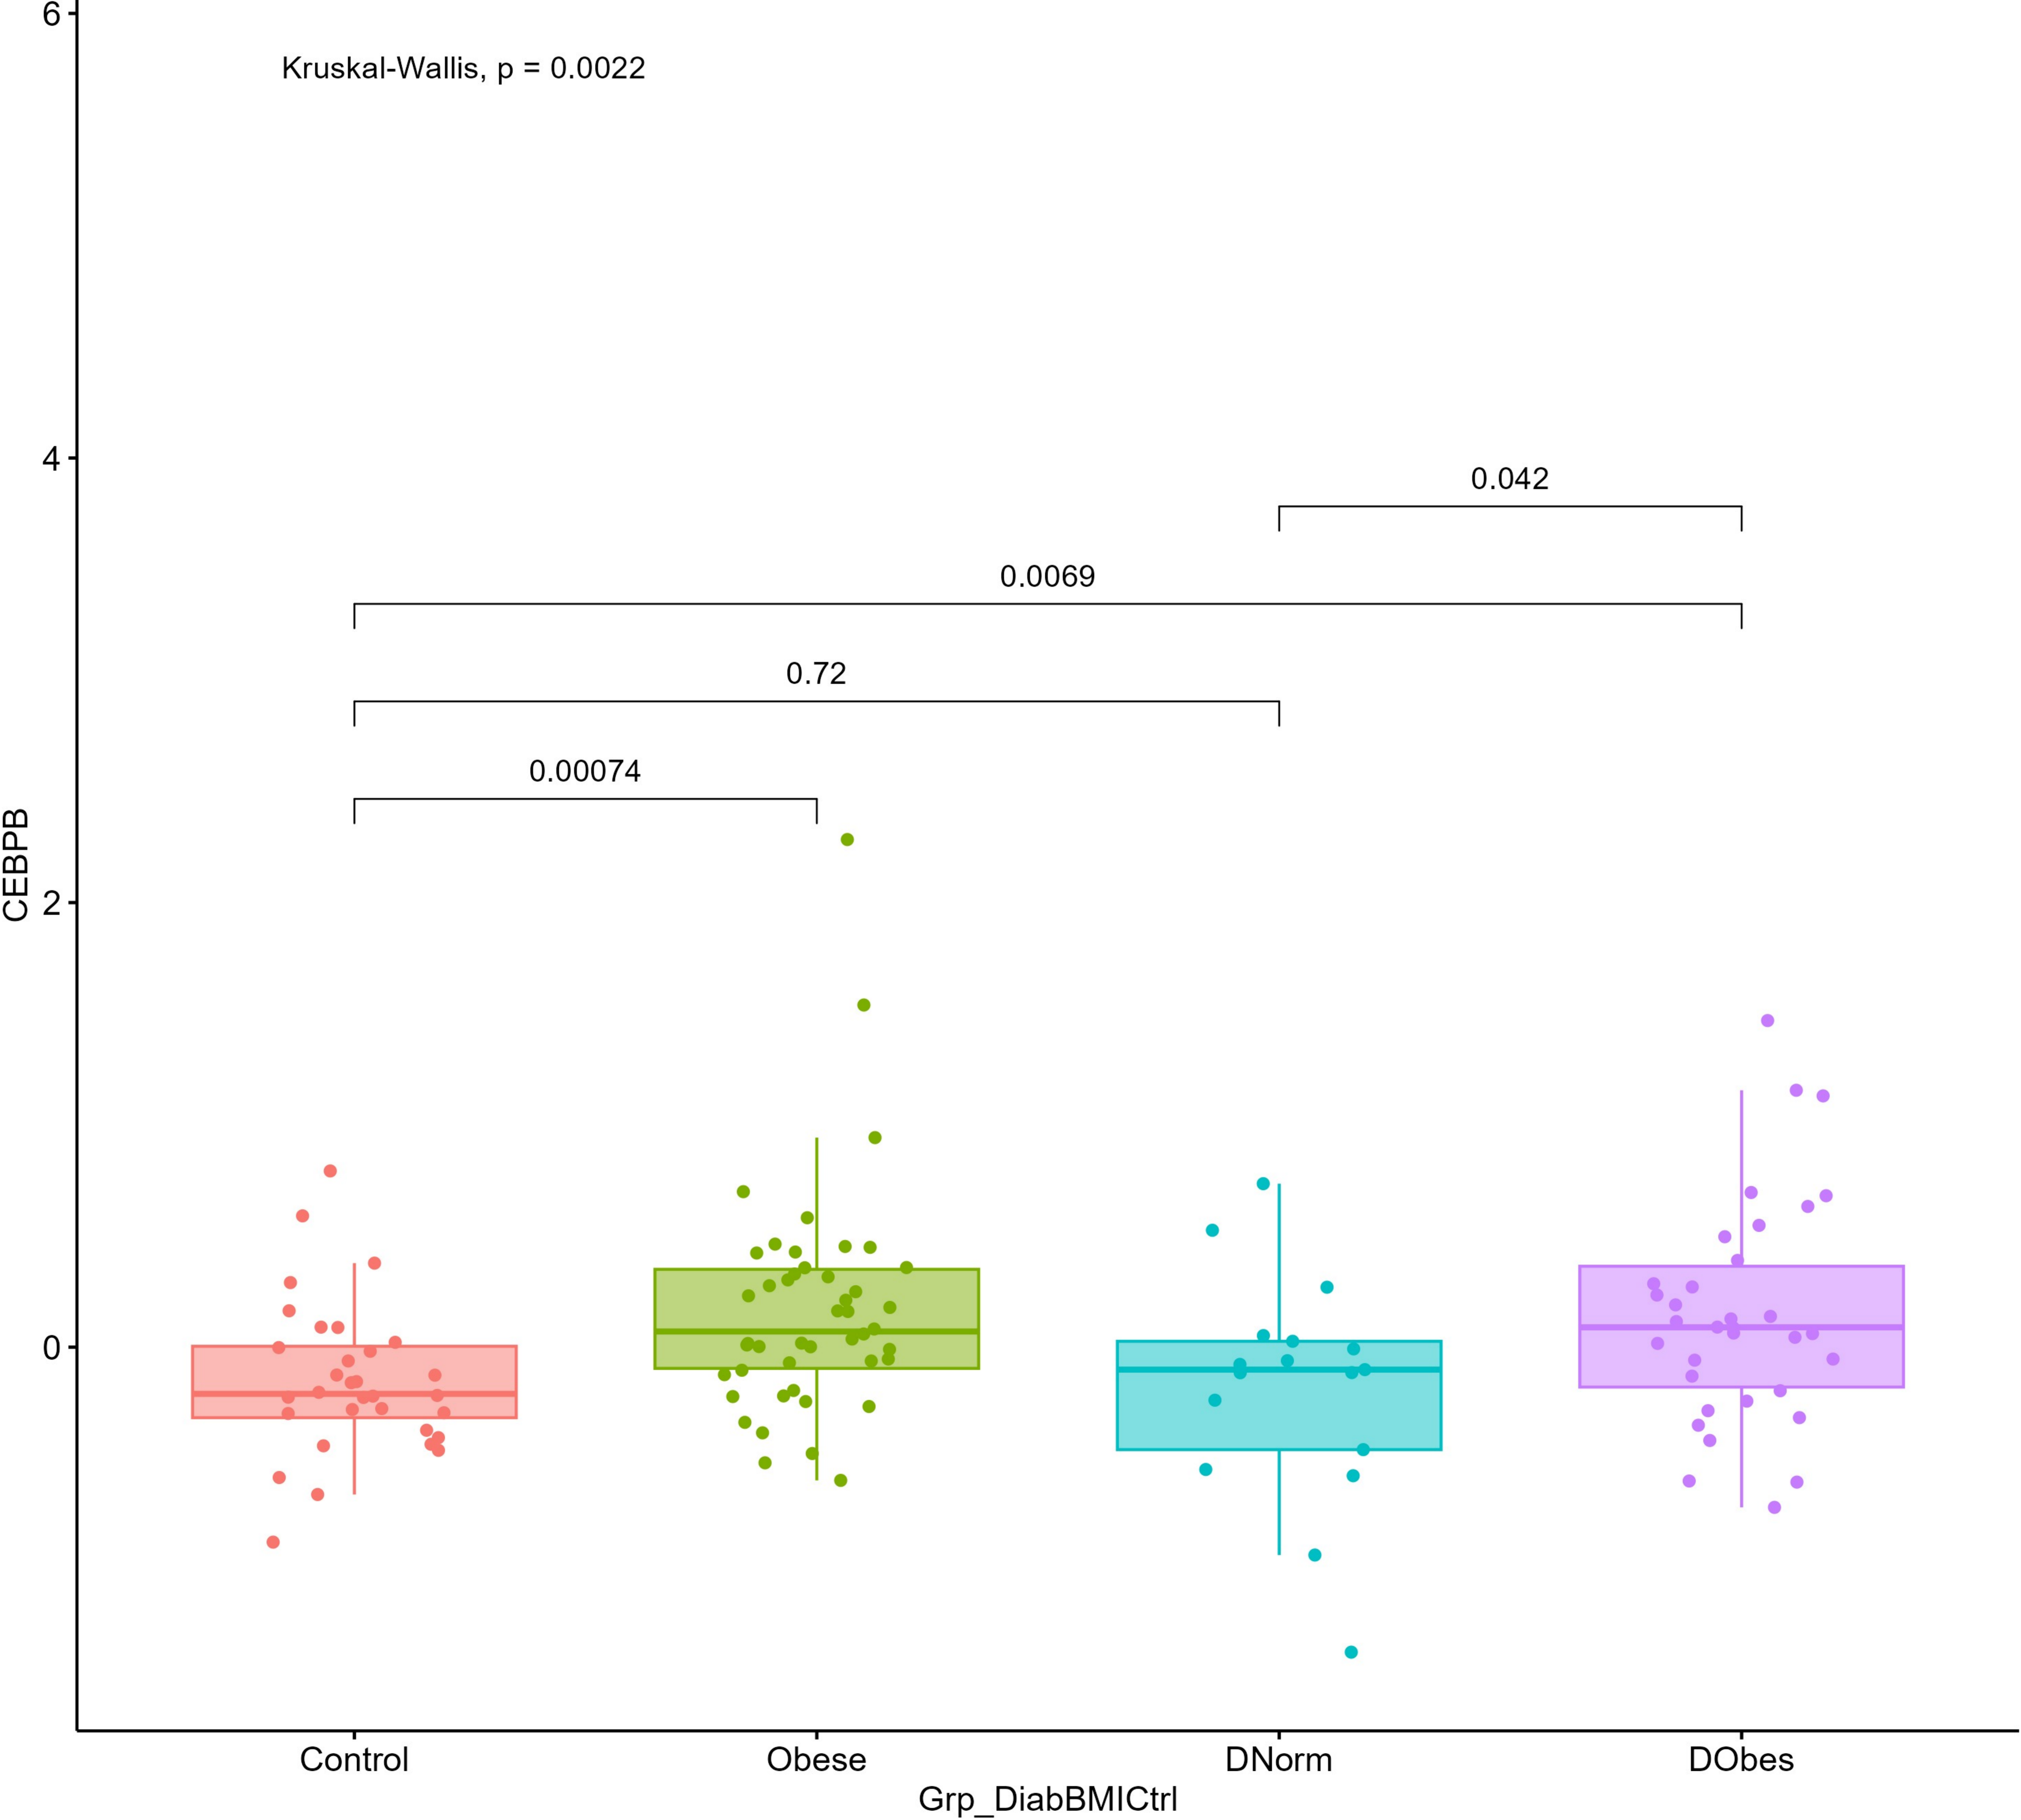

# Grp\_DiabBMICtrl

Grp\_DiabBMICtrl Control Obese DNorm DObes

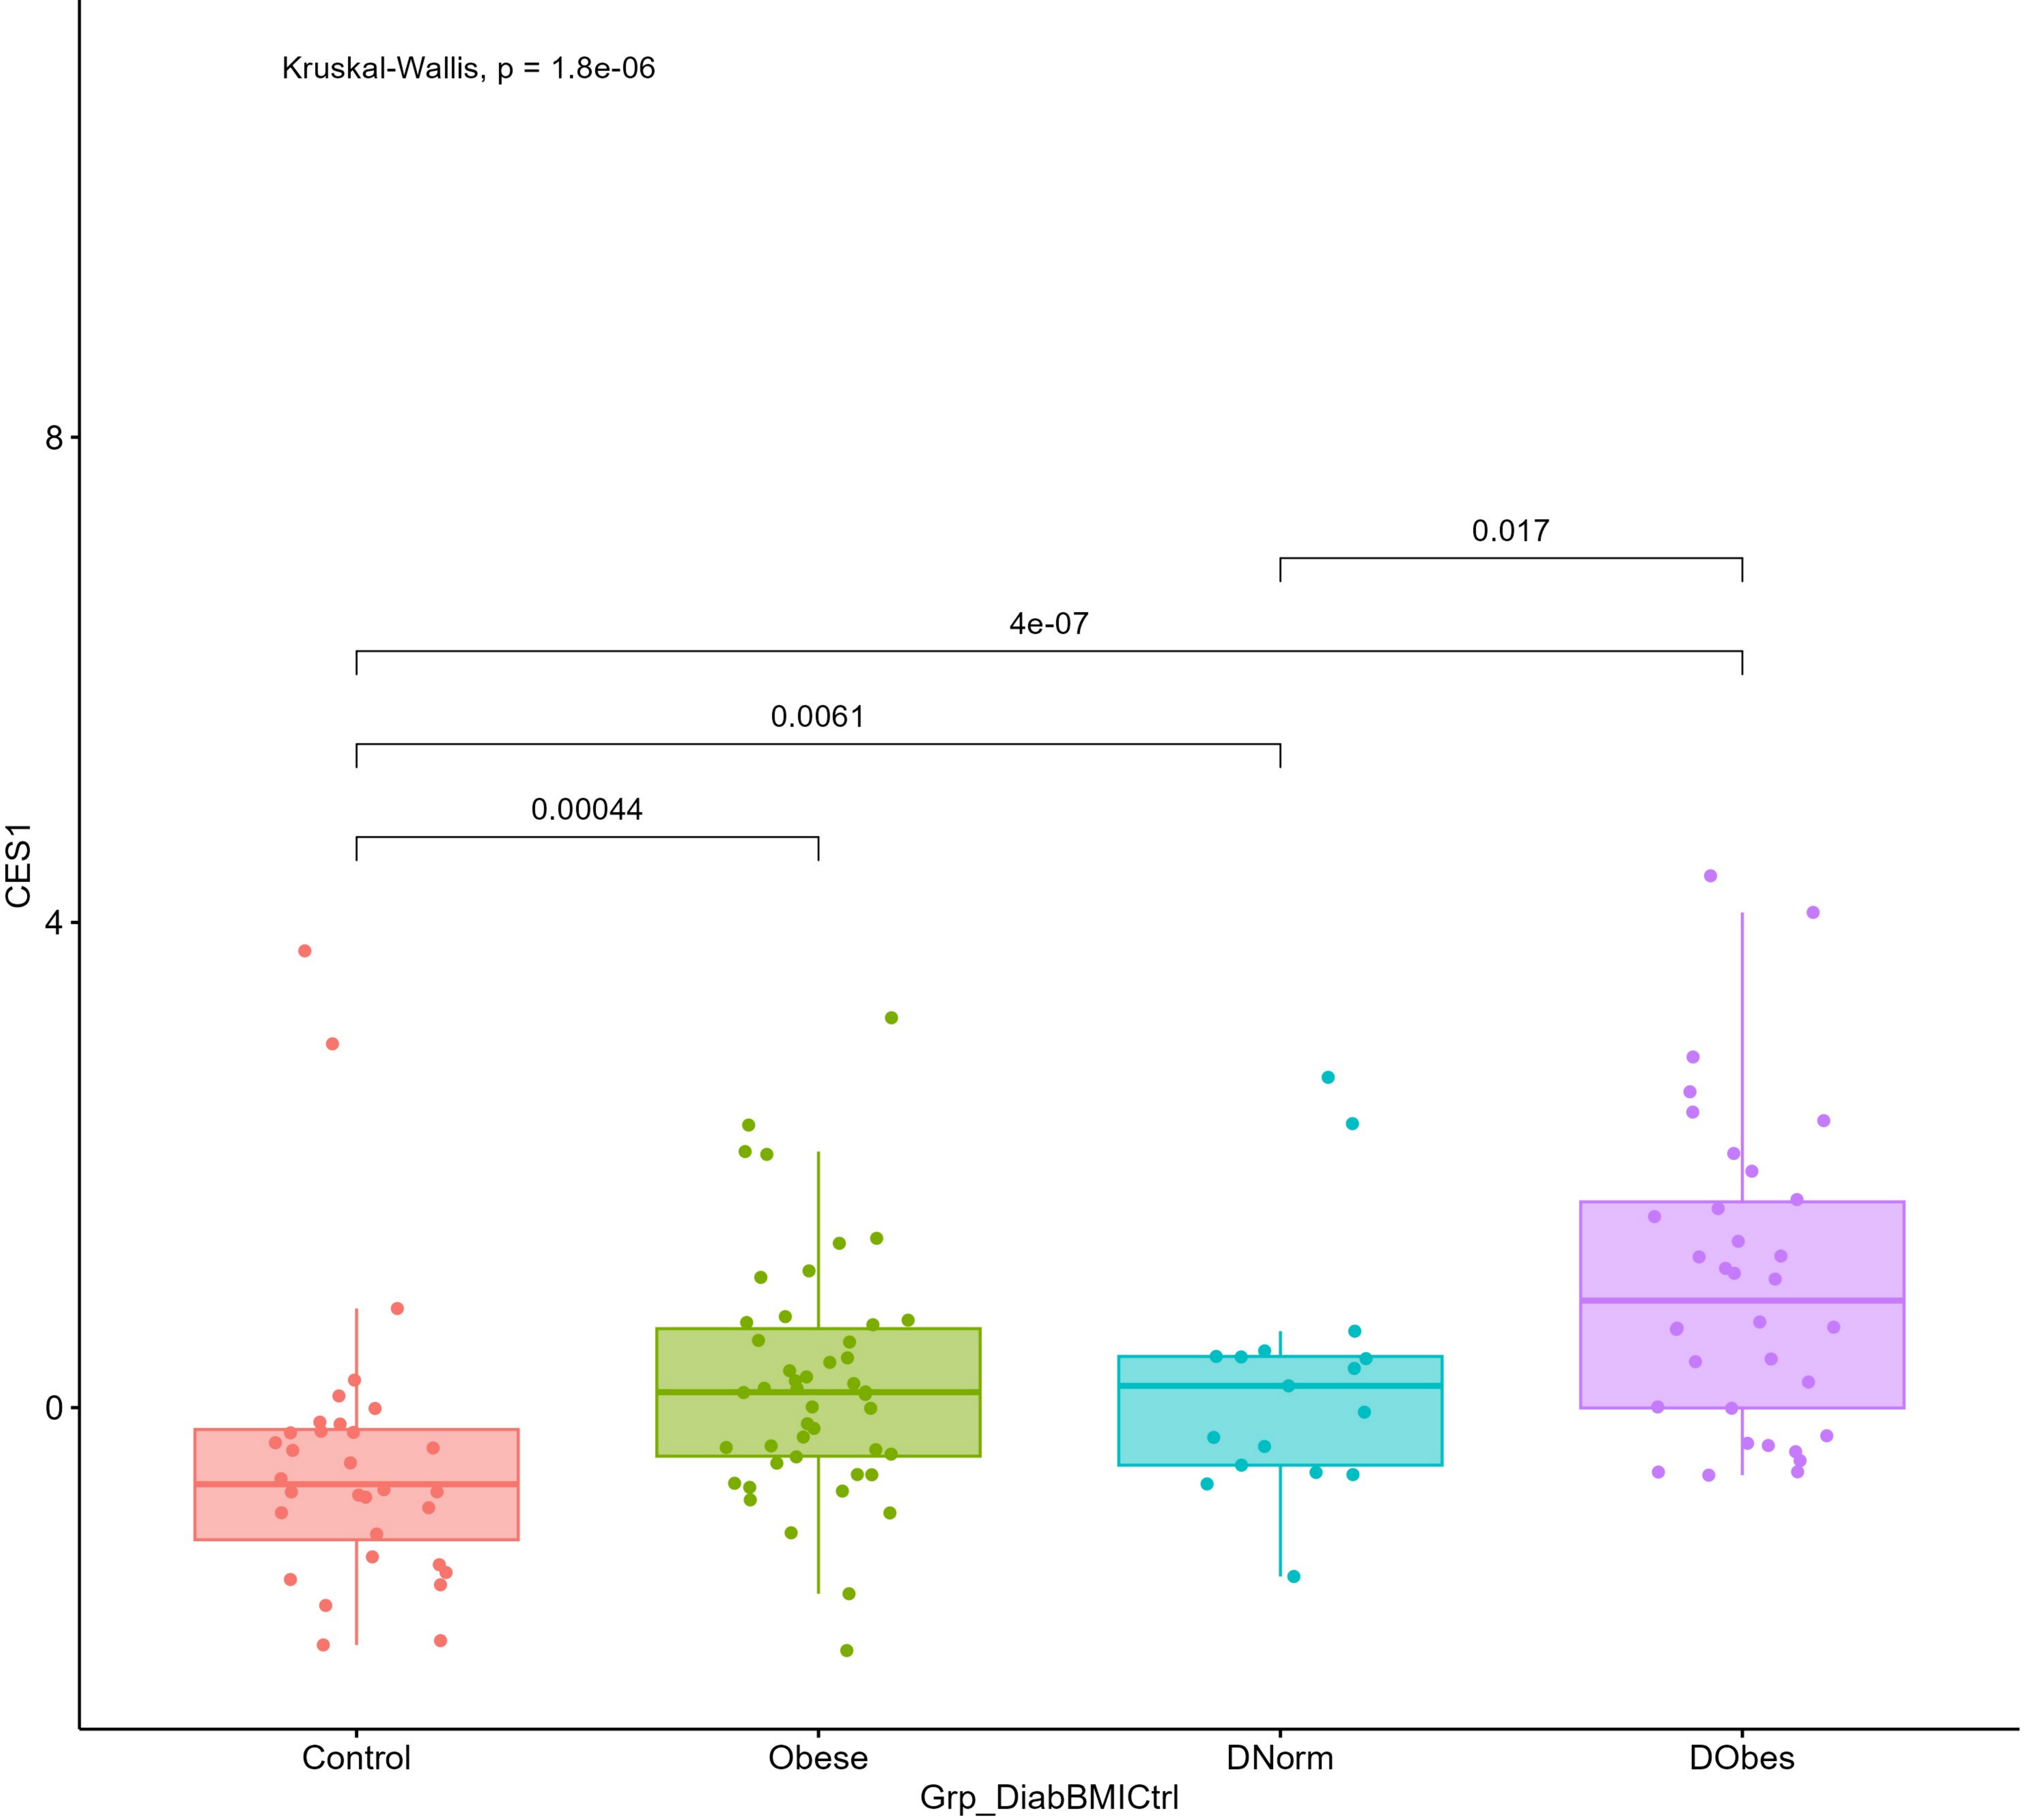

# Grp\_DiabBMICtrl

Grp\_DiabBMICtrl Control Obese DNorm DObes

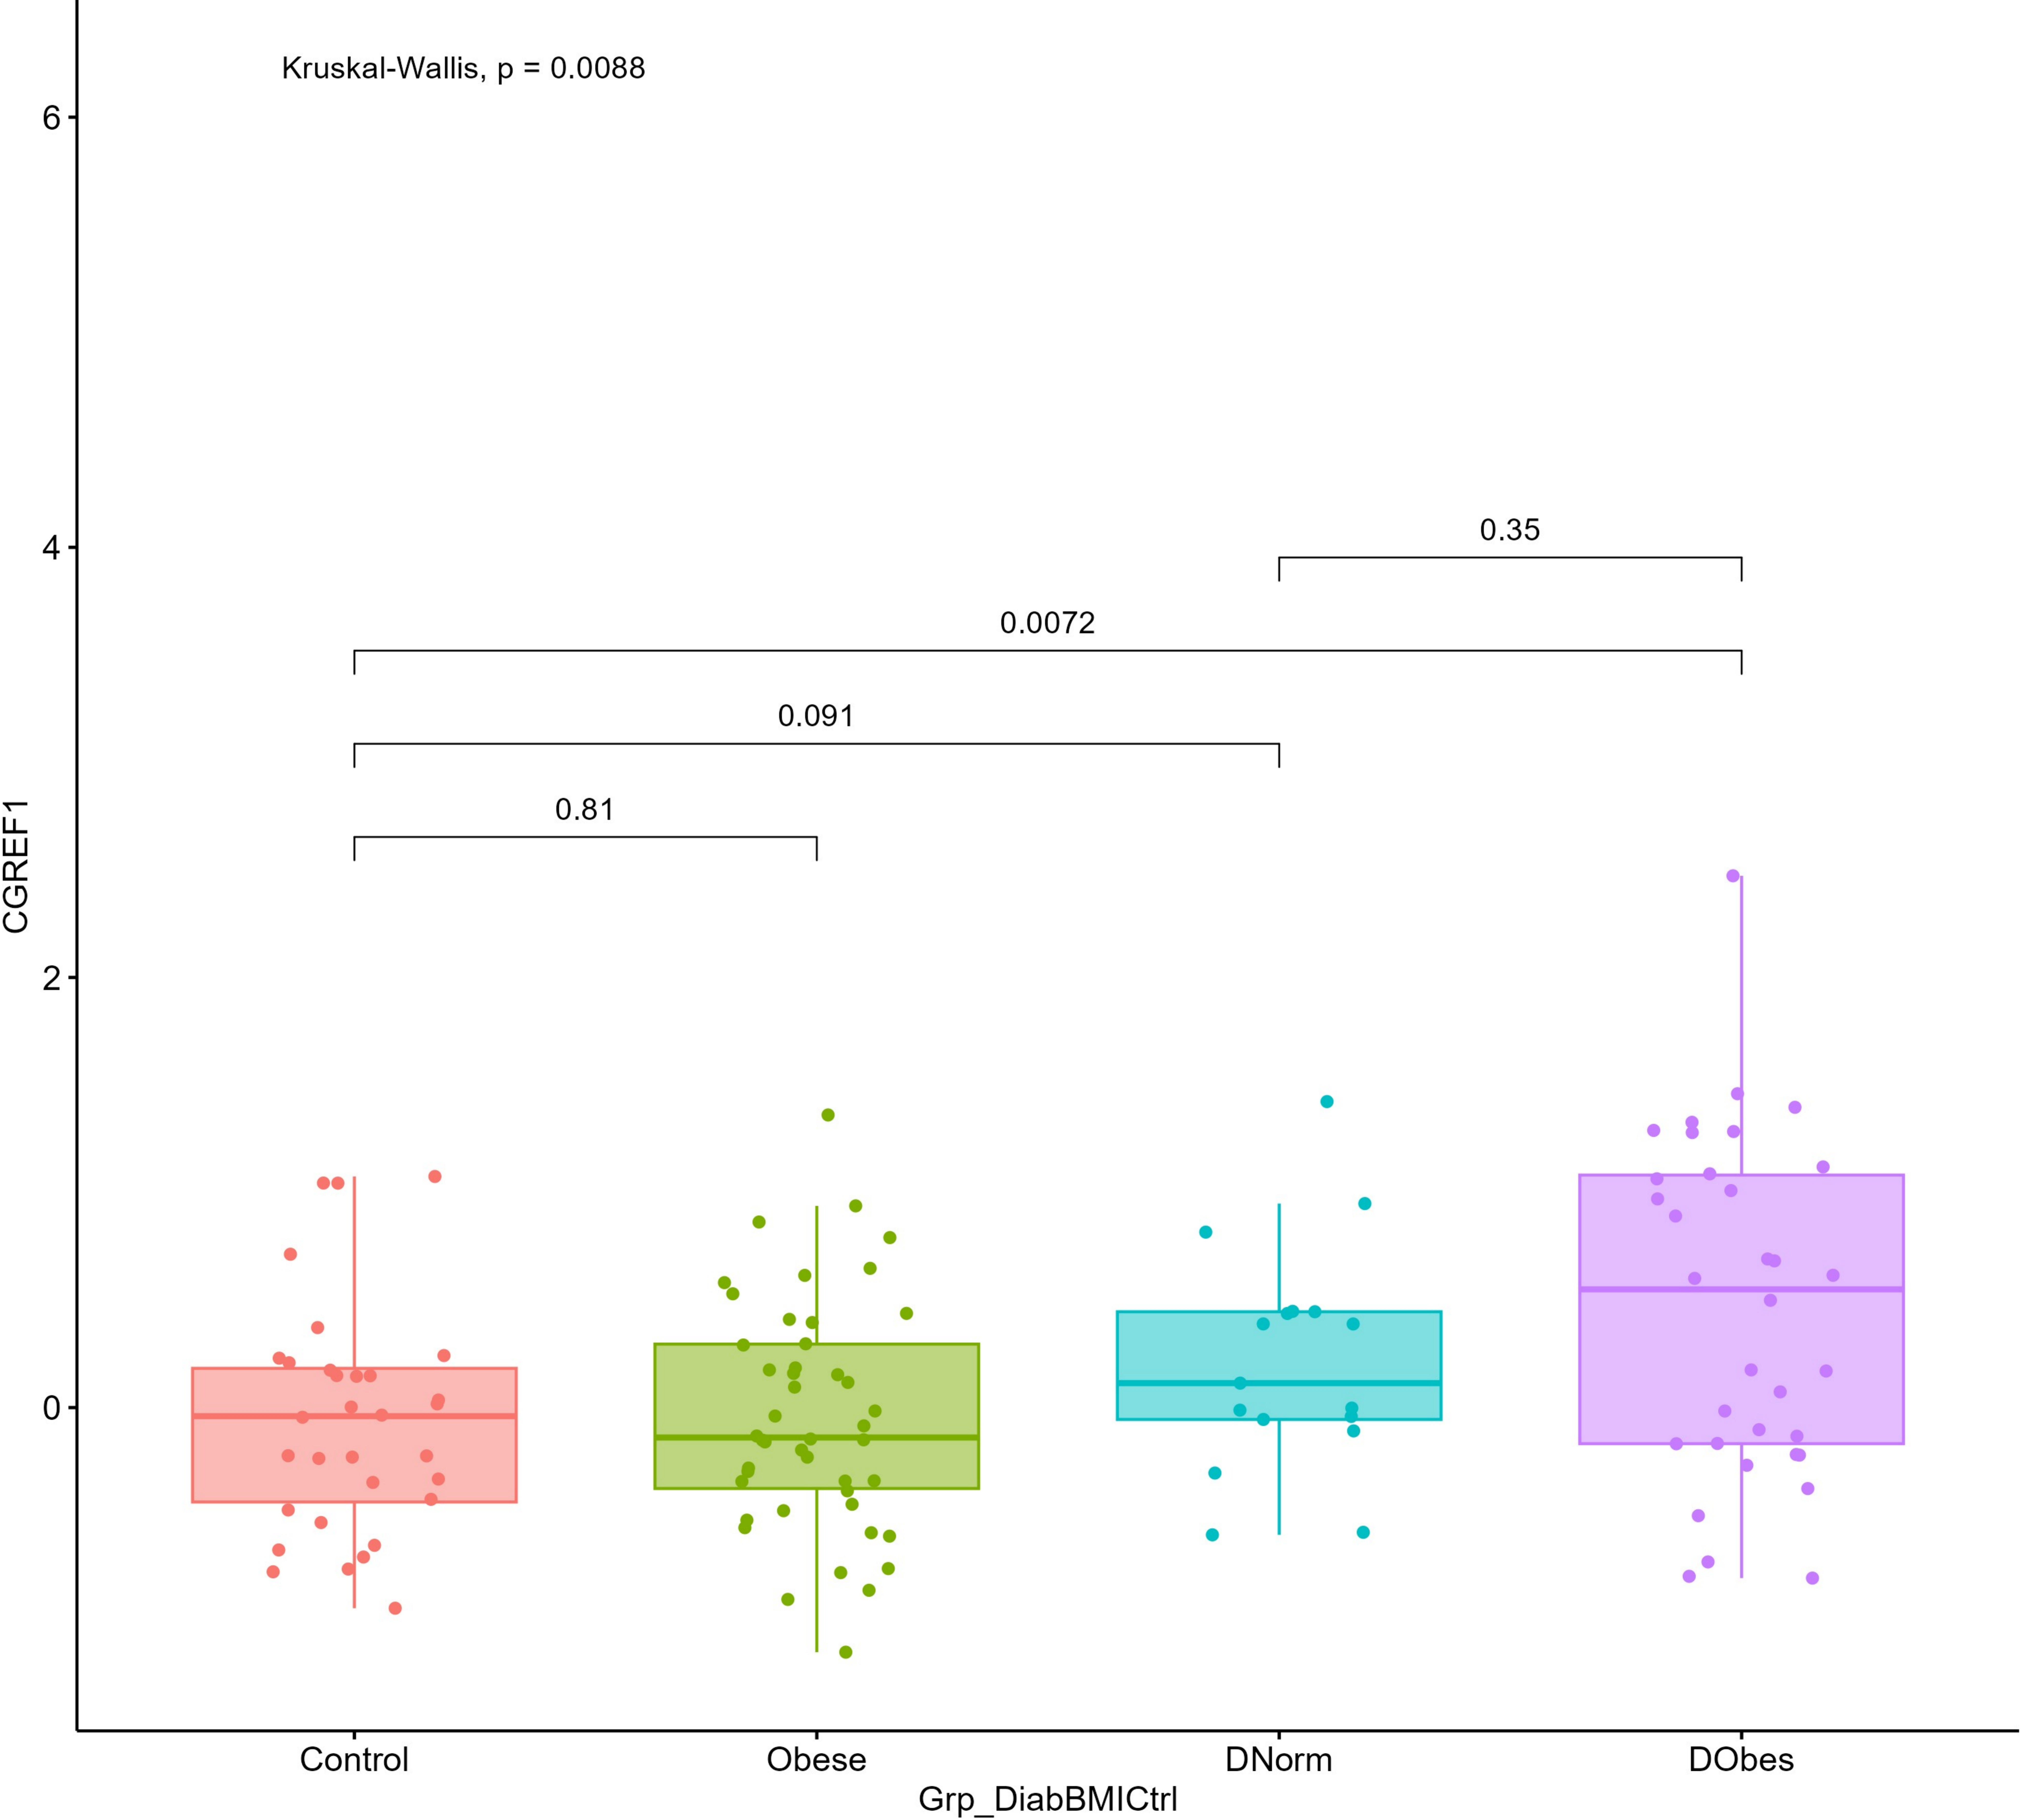

# Grp\_DiabBMICtrl

Grp\_DiabBMICtrl Control Obese DNorm DObes

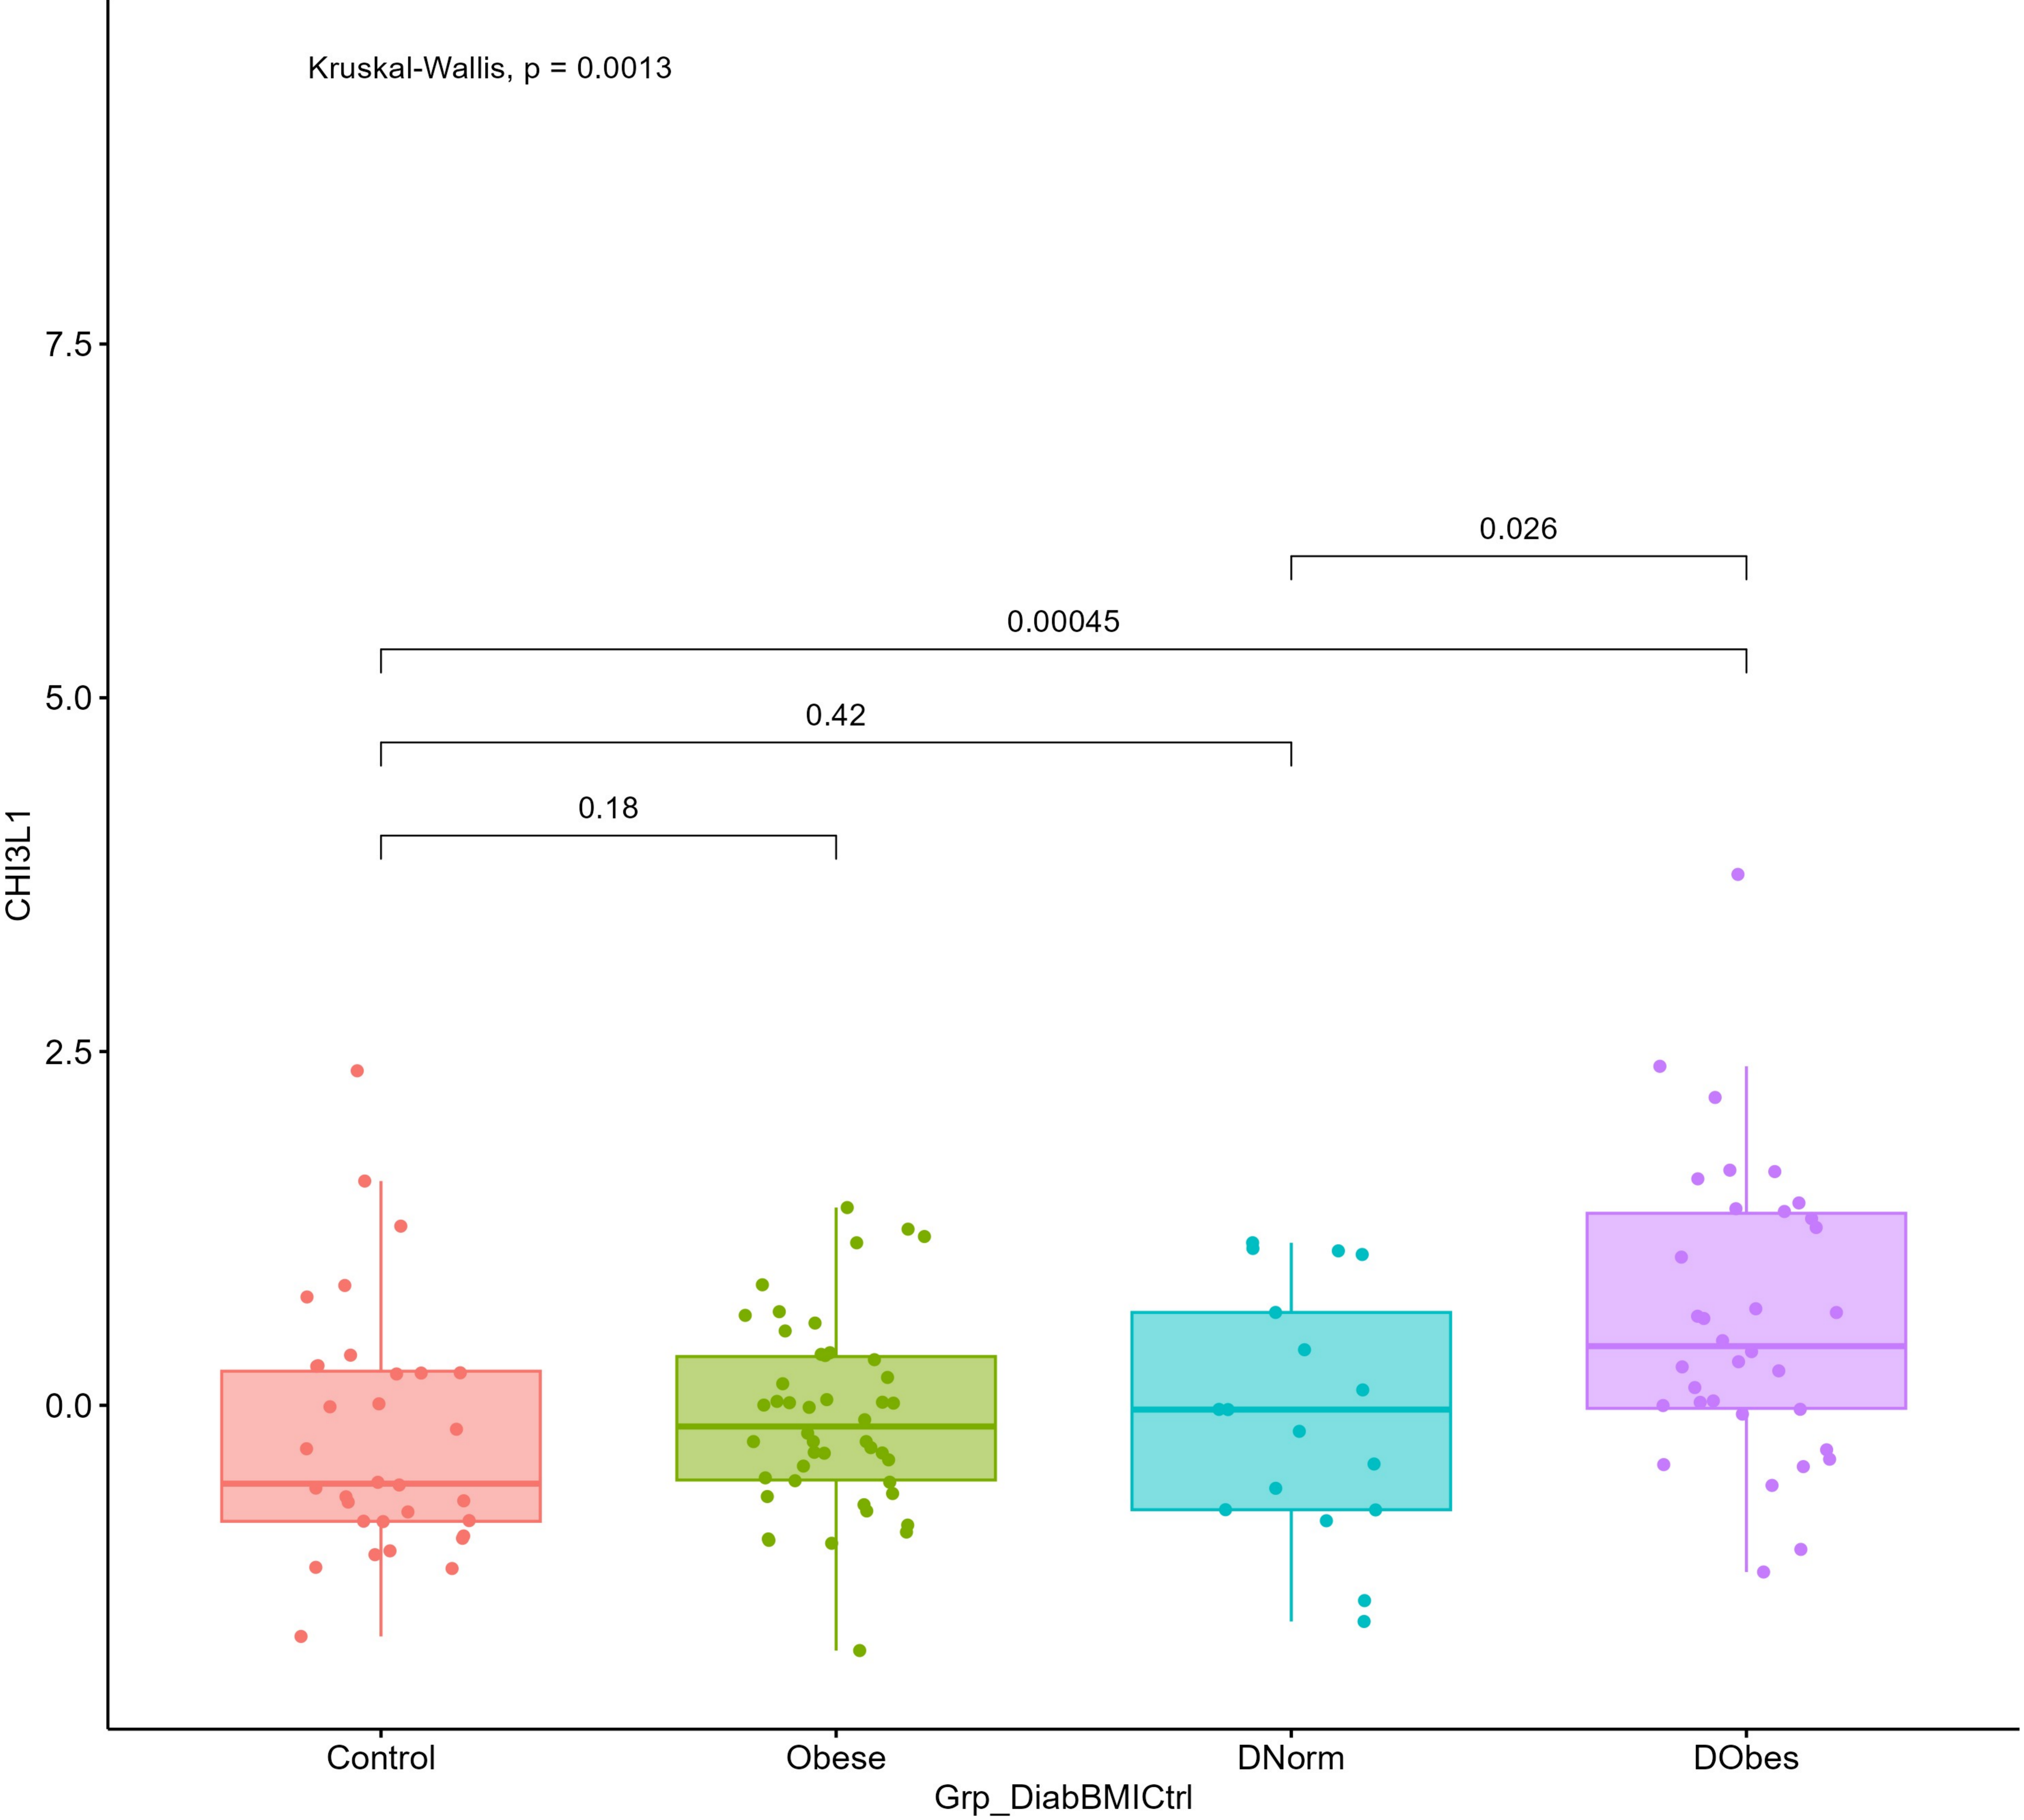

# Grp\_DiabBMICtrl

Grp\_DiabBMICtrl Control Obese DNorm DObes

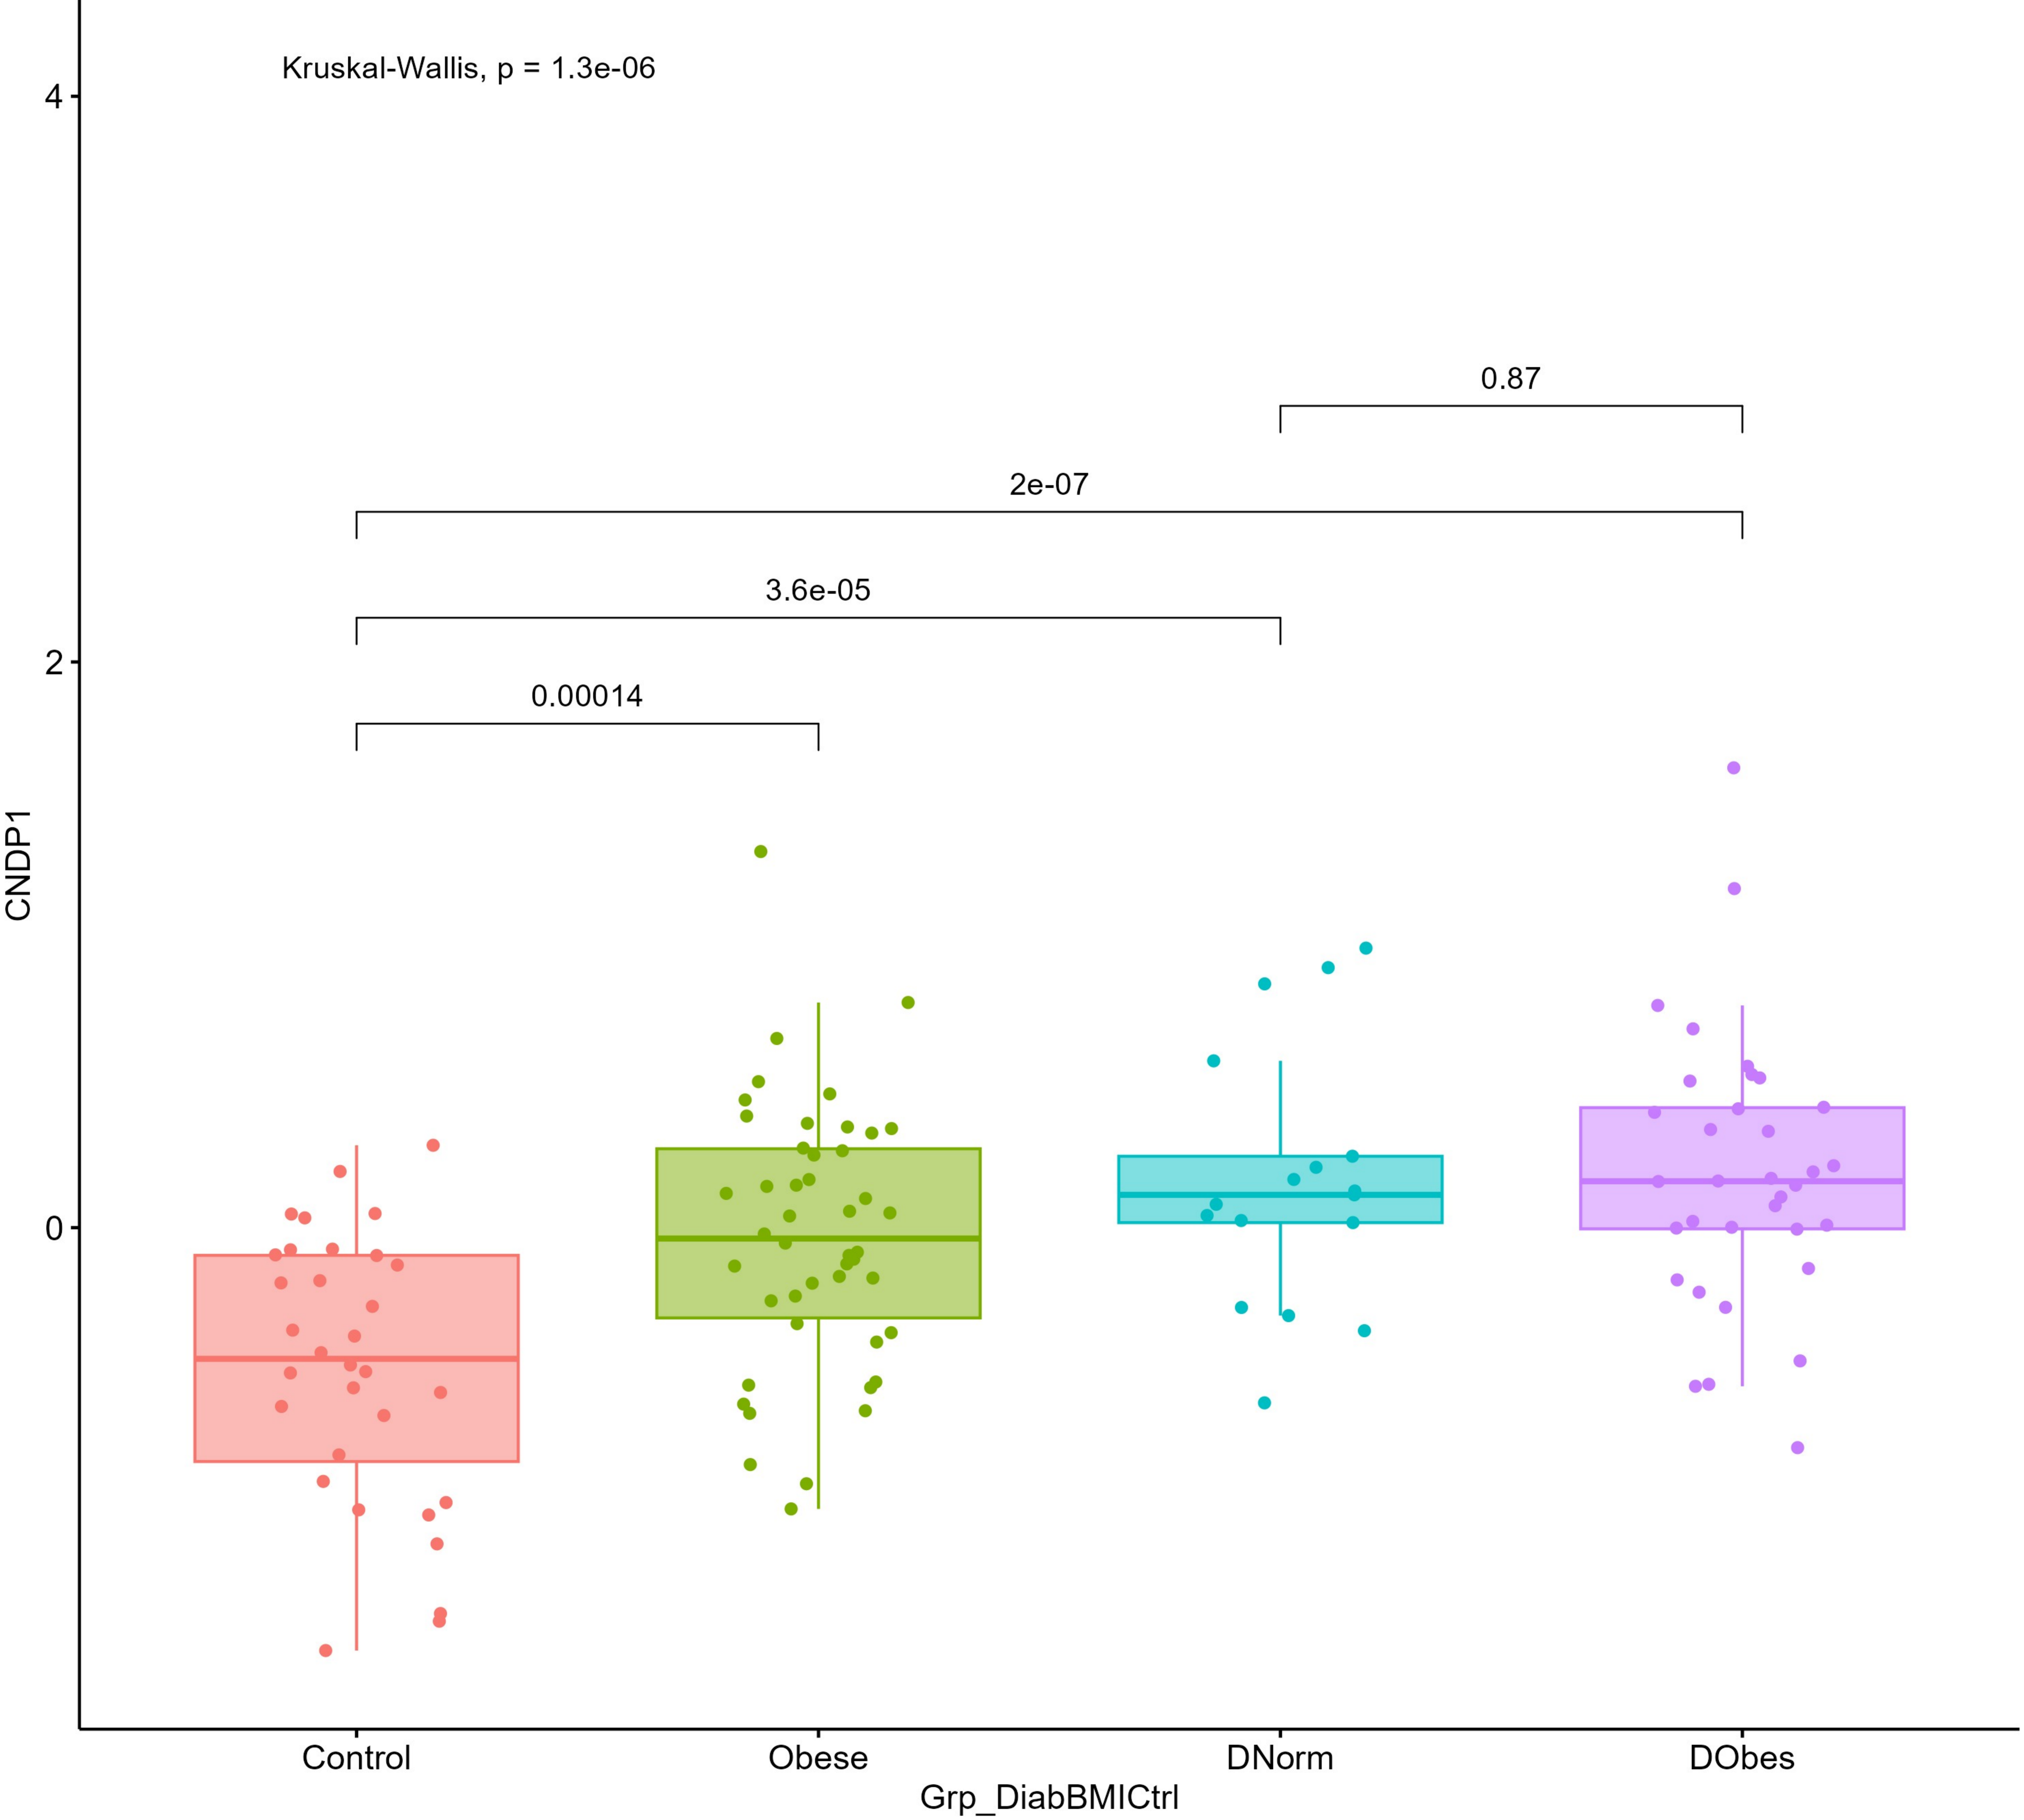

# Grp\_DiabBMICtrl

Grp\_DiabBMICtrl Control Obese DNorm DObes

Kruskal-Wallis,  $p = 0.00085$

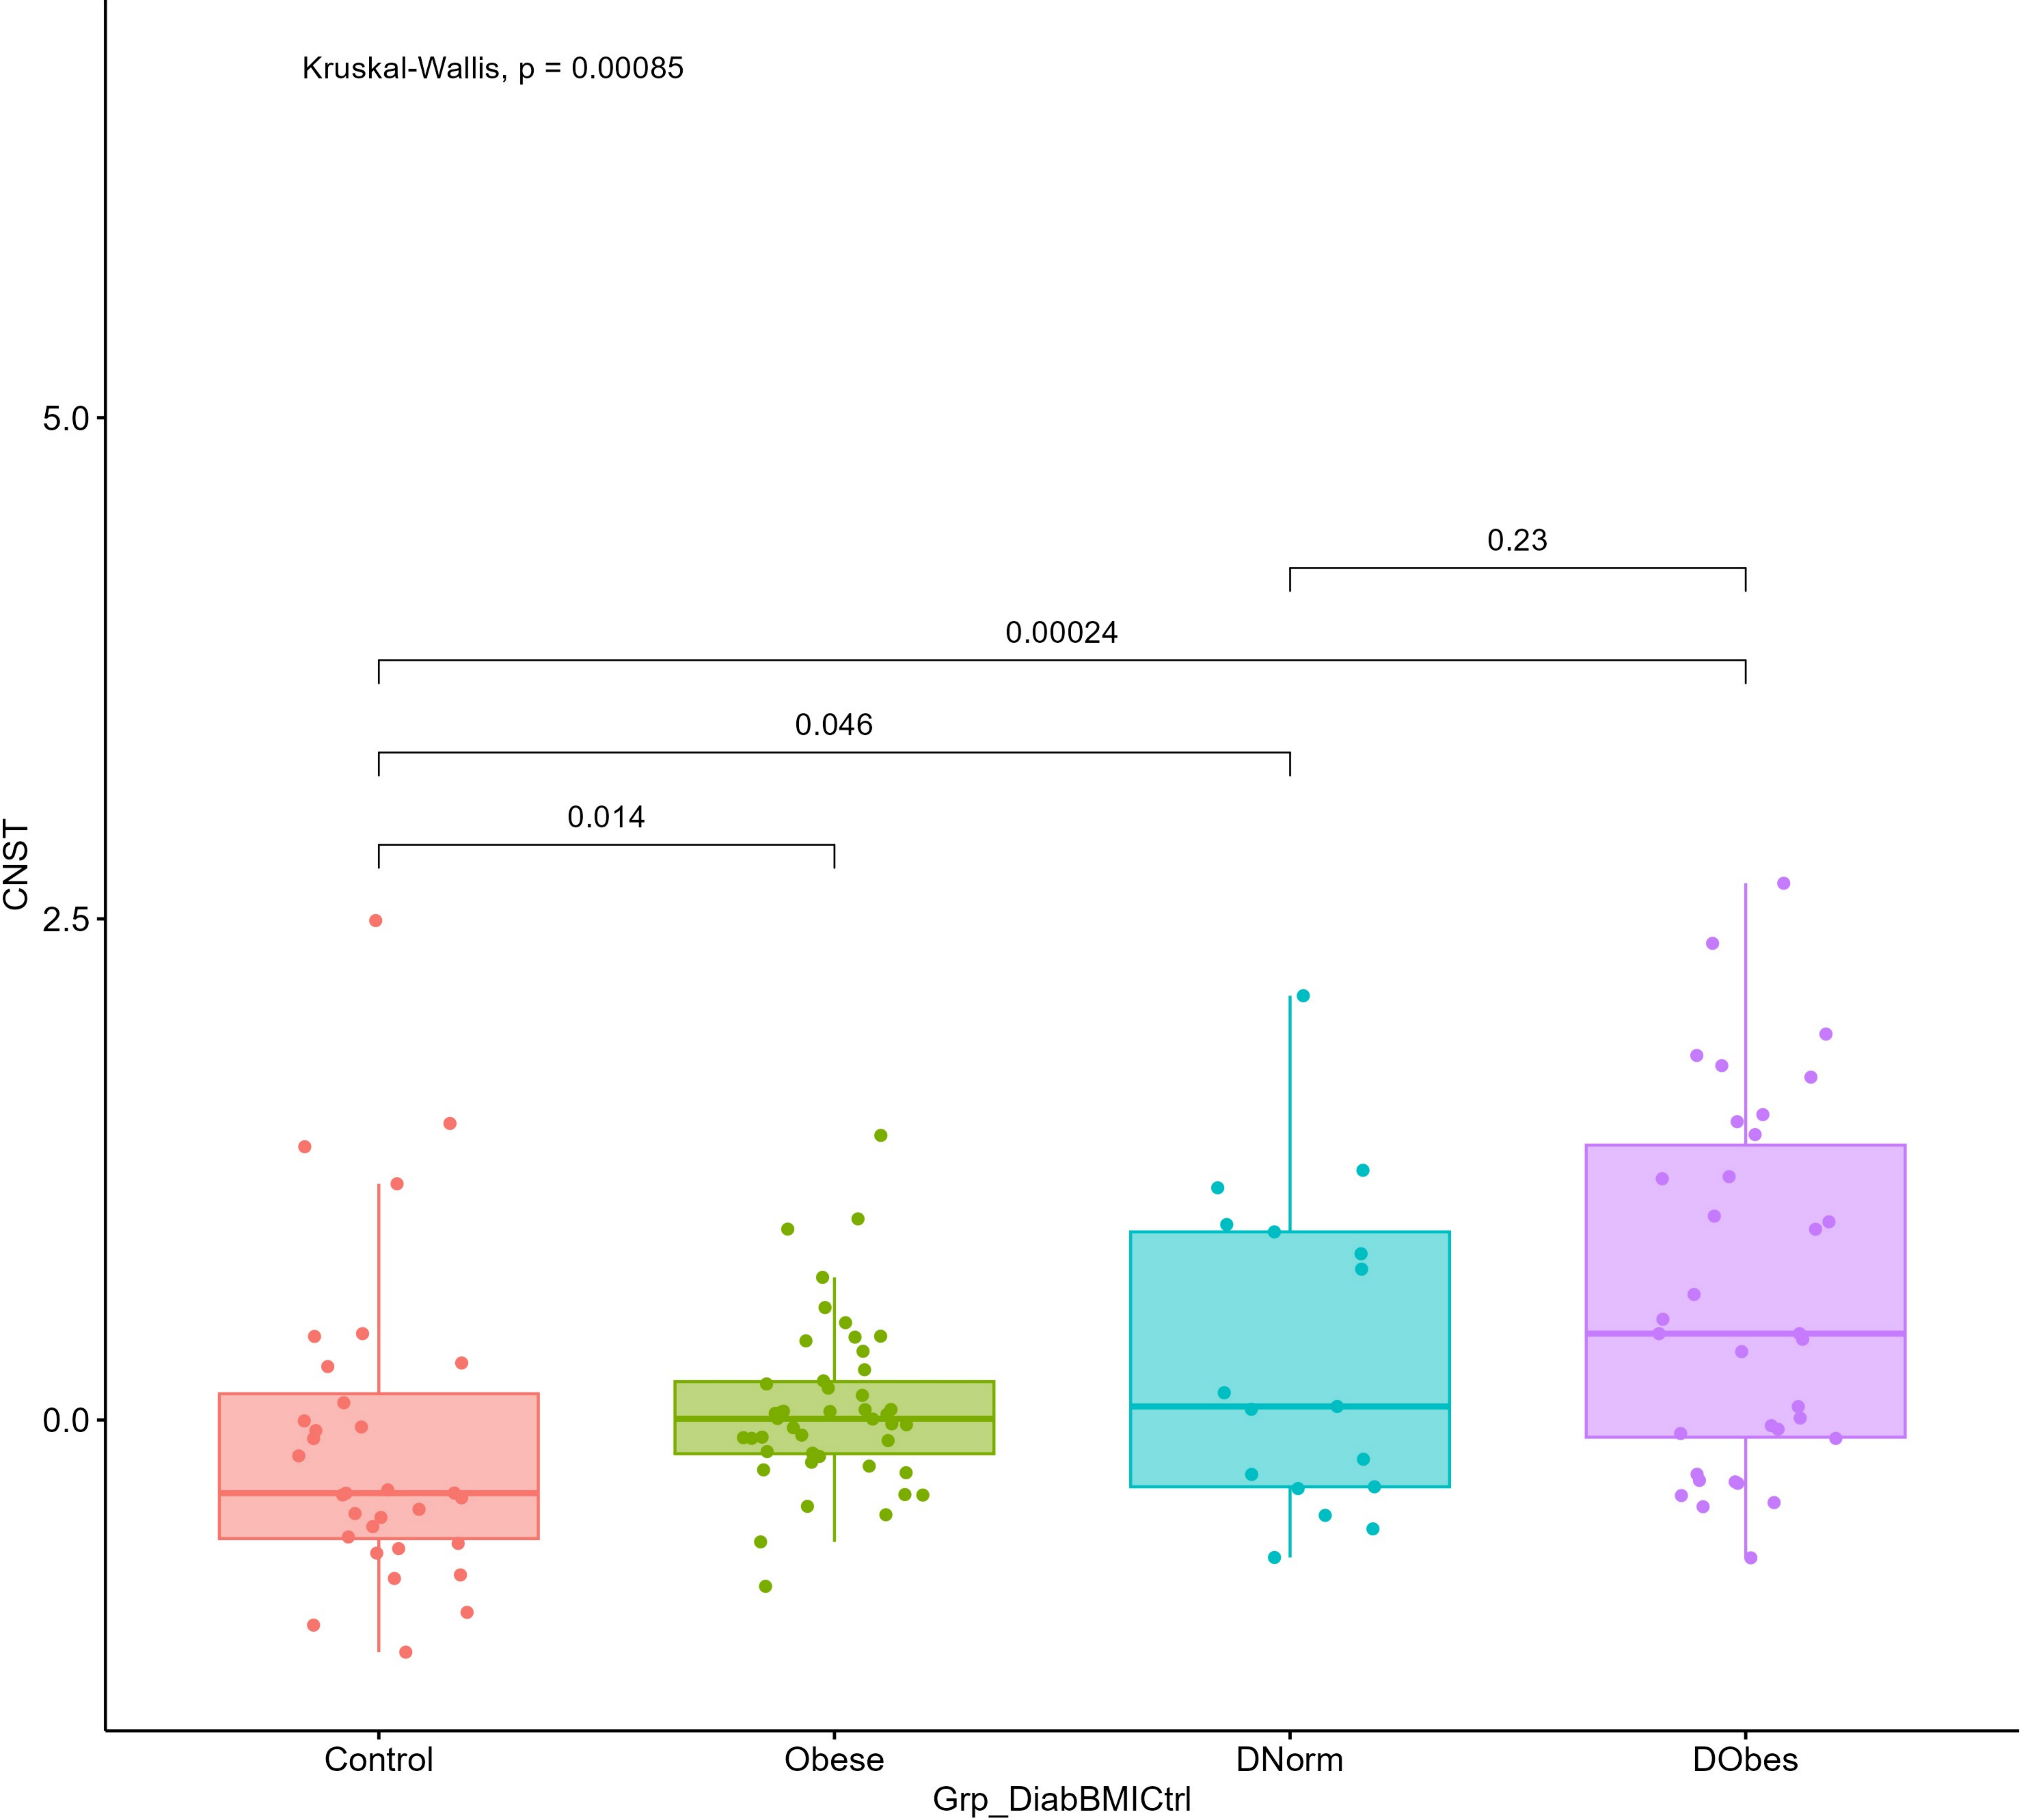

# Grp\_DiabBMICtrl

Grp\_DiabBMICtrl Control Obese DNorm DObes

Kruskal-Wallis,  $p = 6.2e-07$

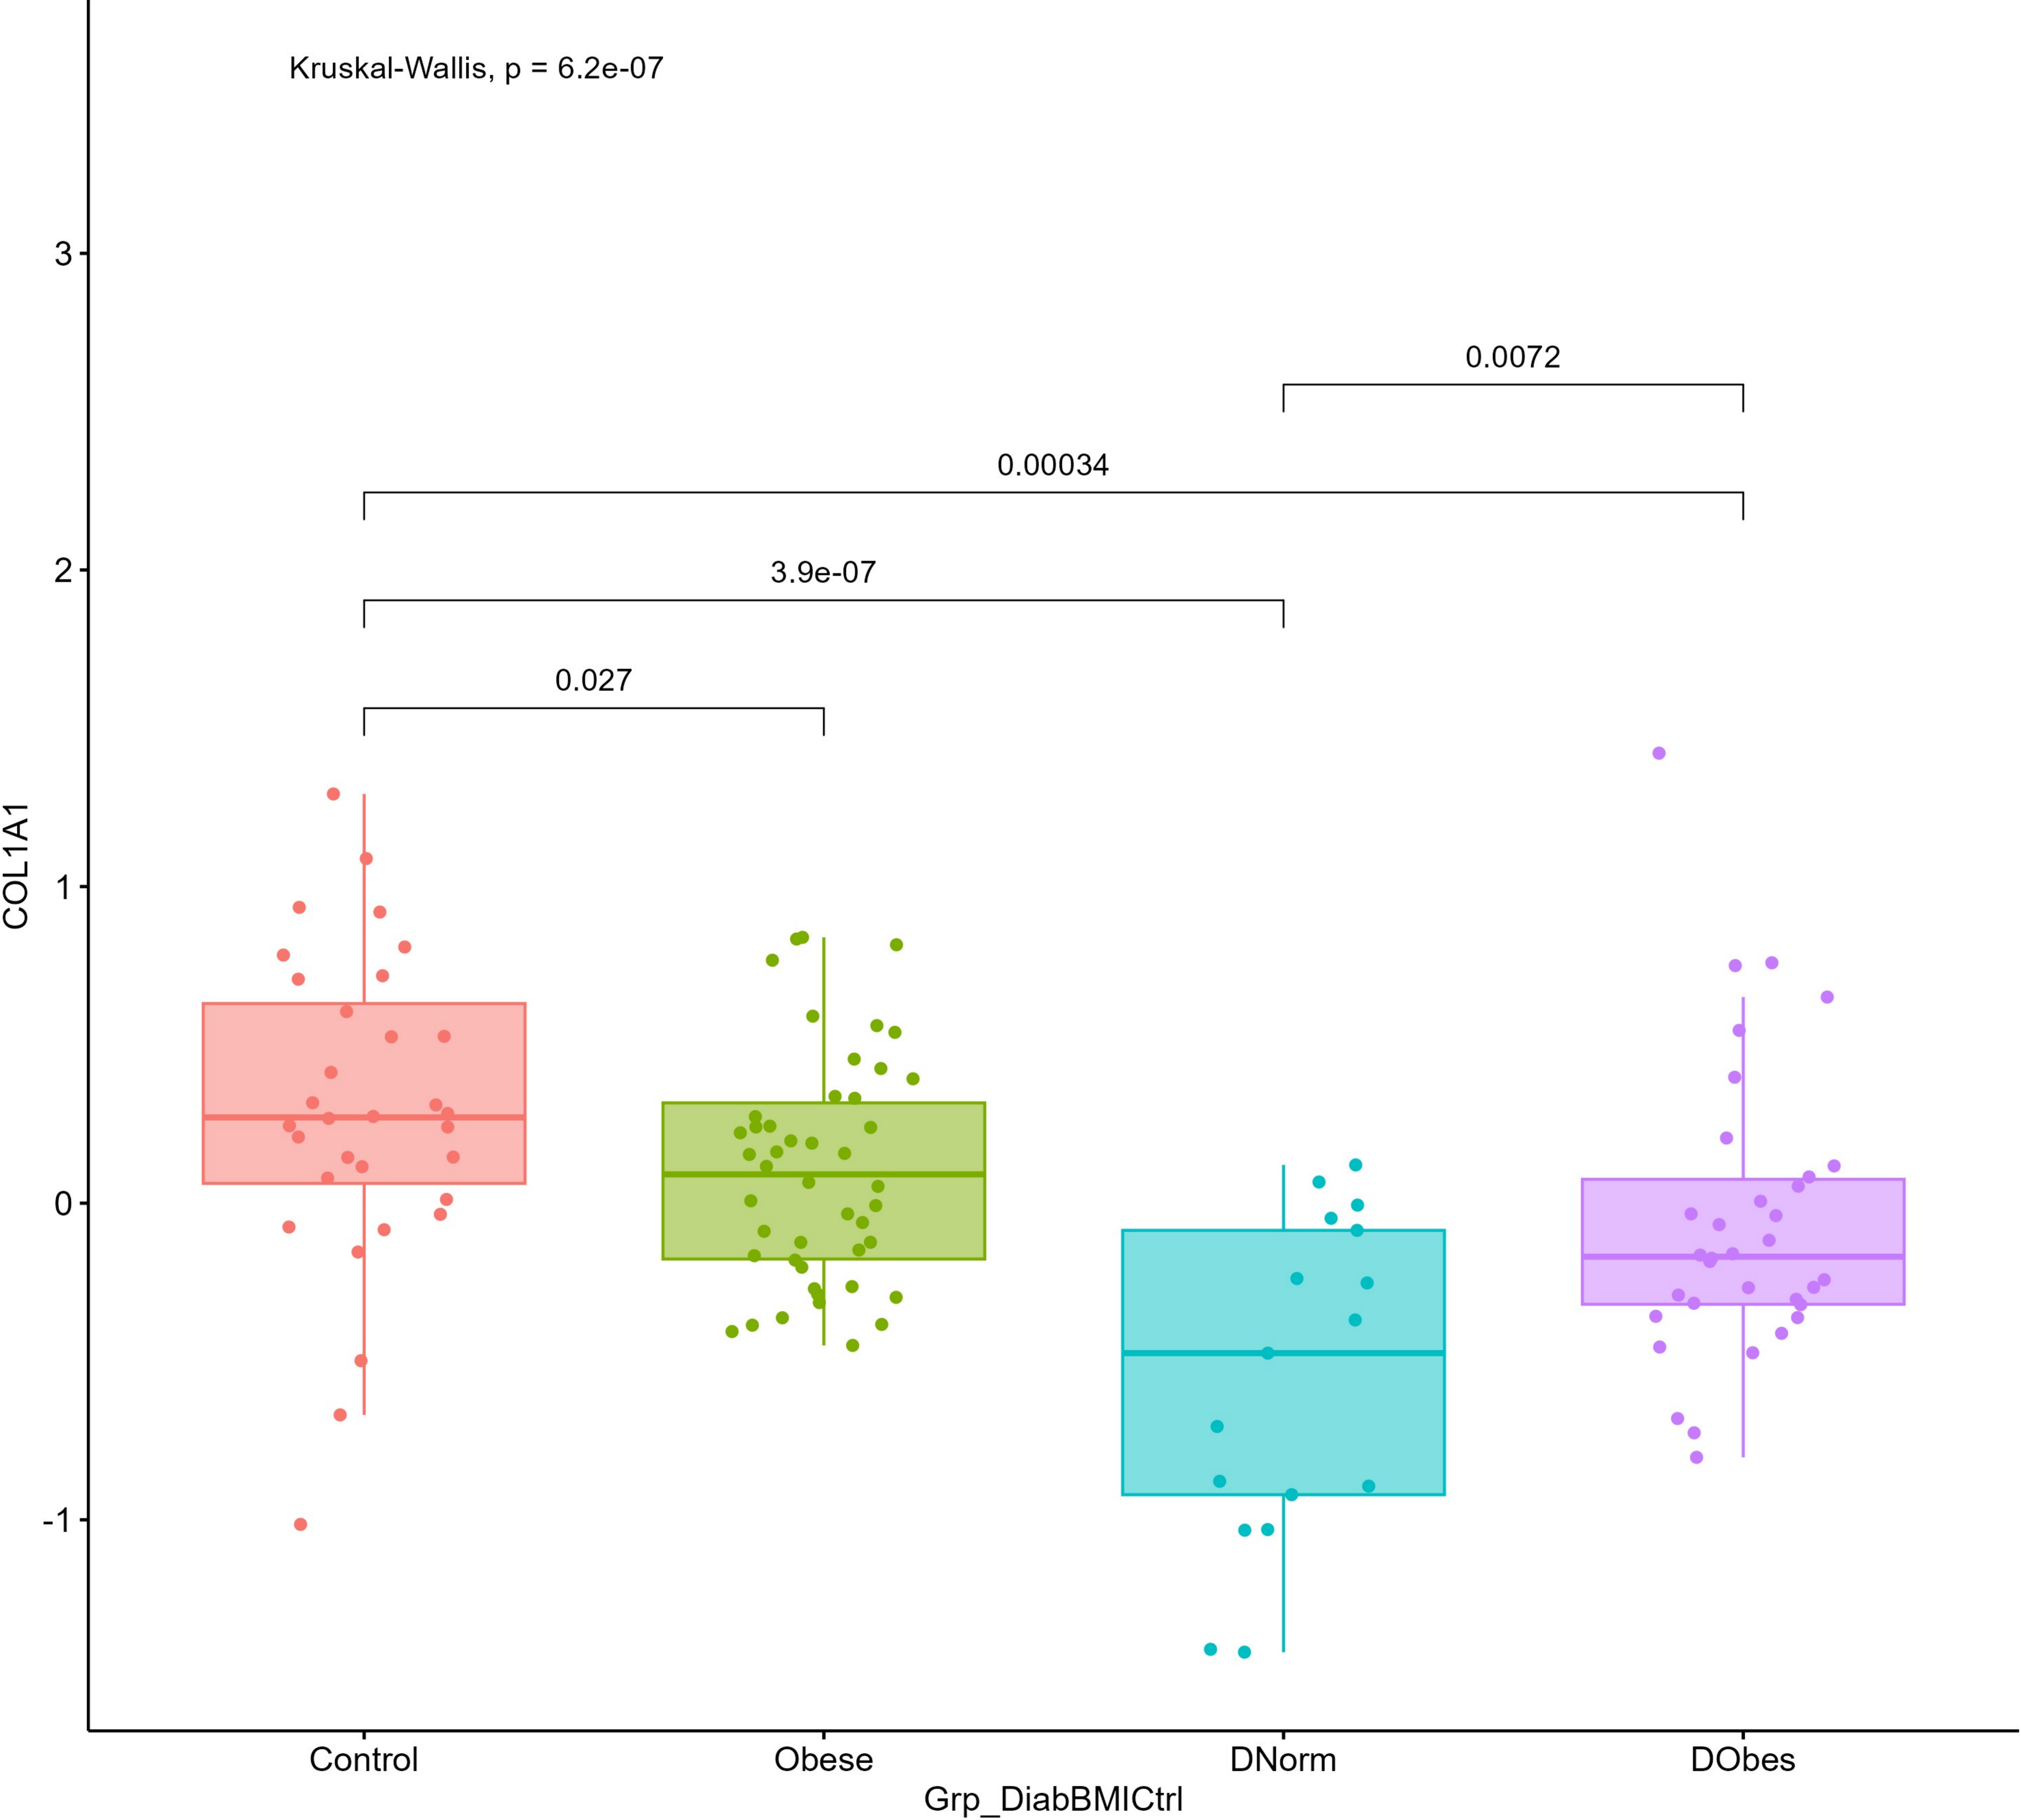

# Grp\_DiabBMICtrl

Grp\_DiabBMICtrl Control Obese DNorm DObes

Kruskal-Wallis, p = 0.00035

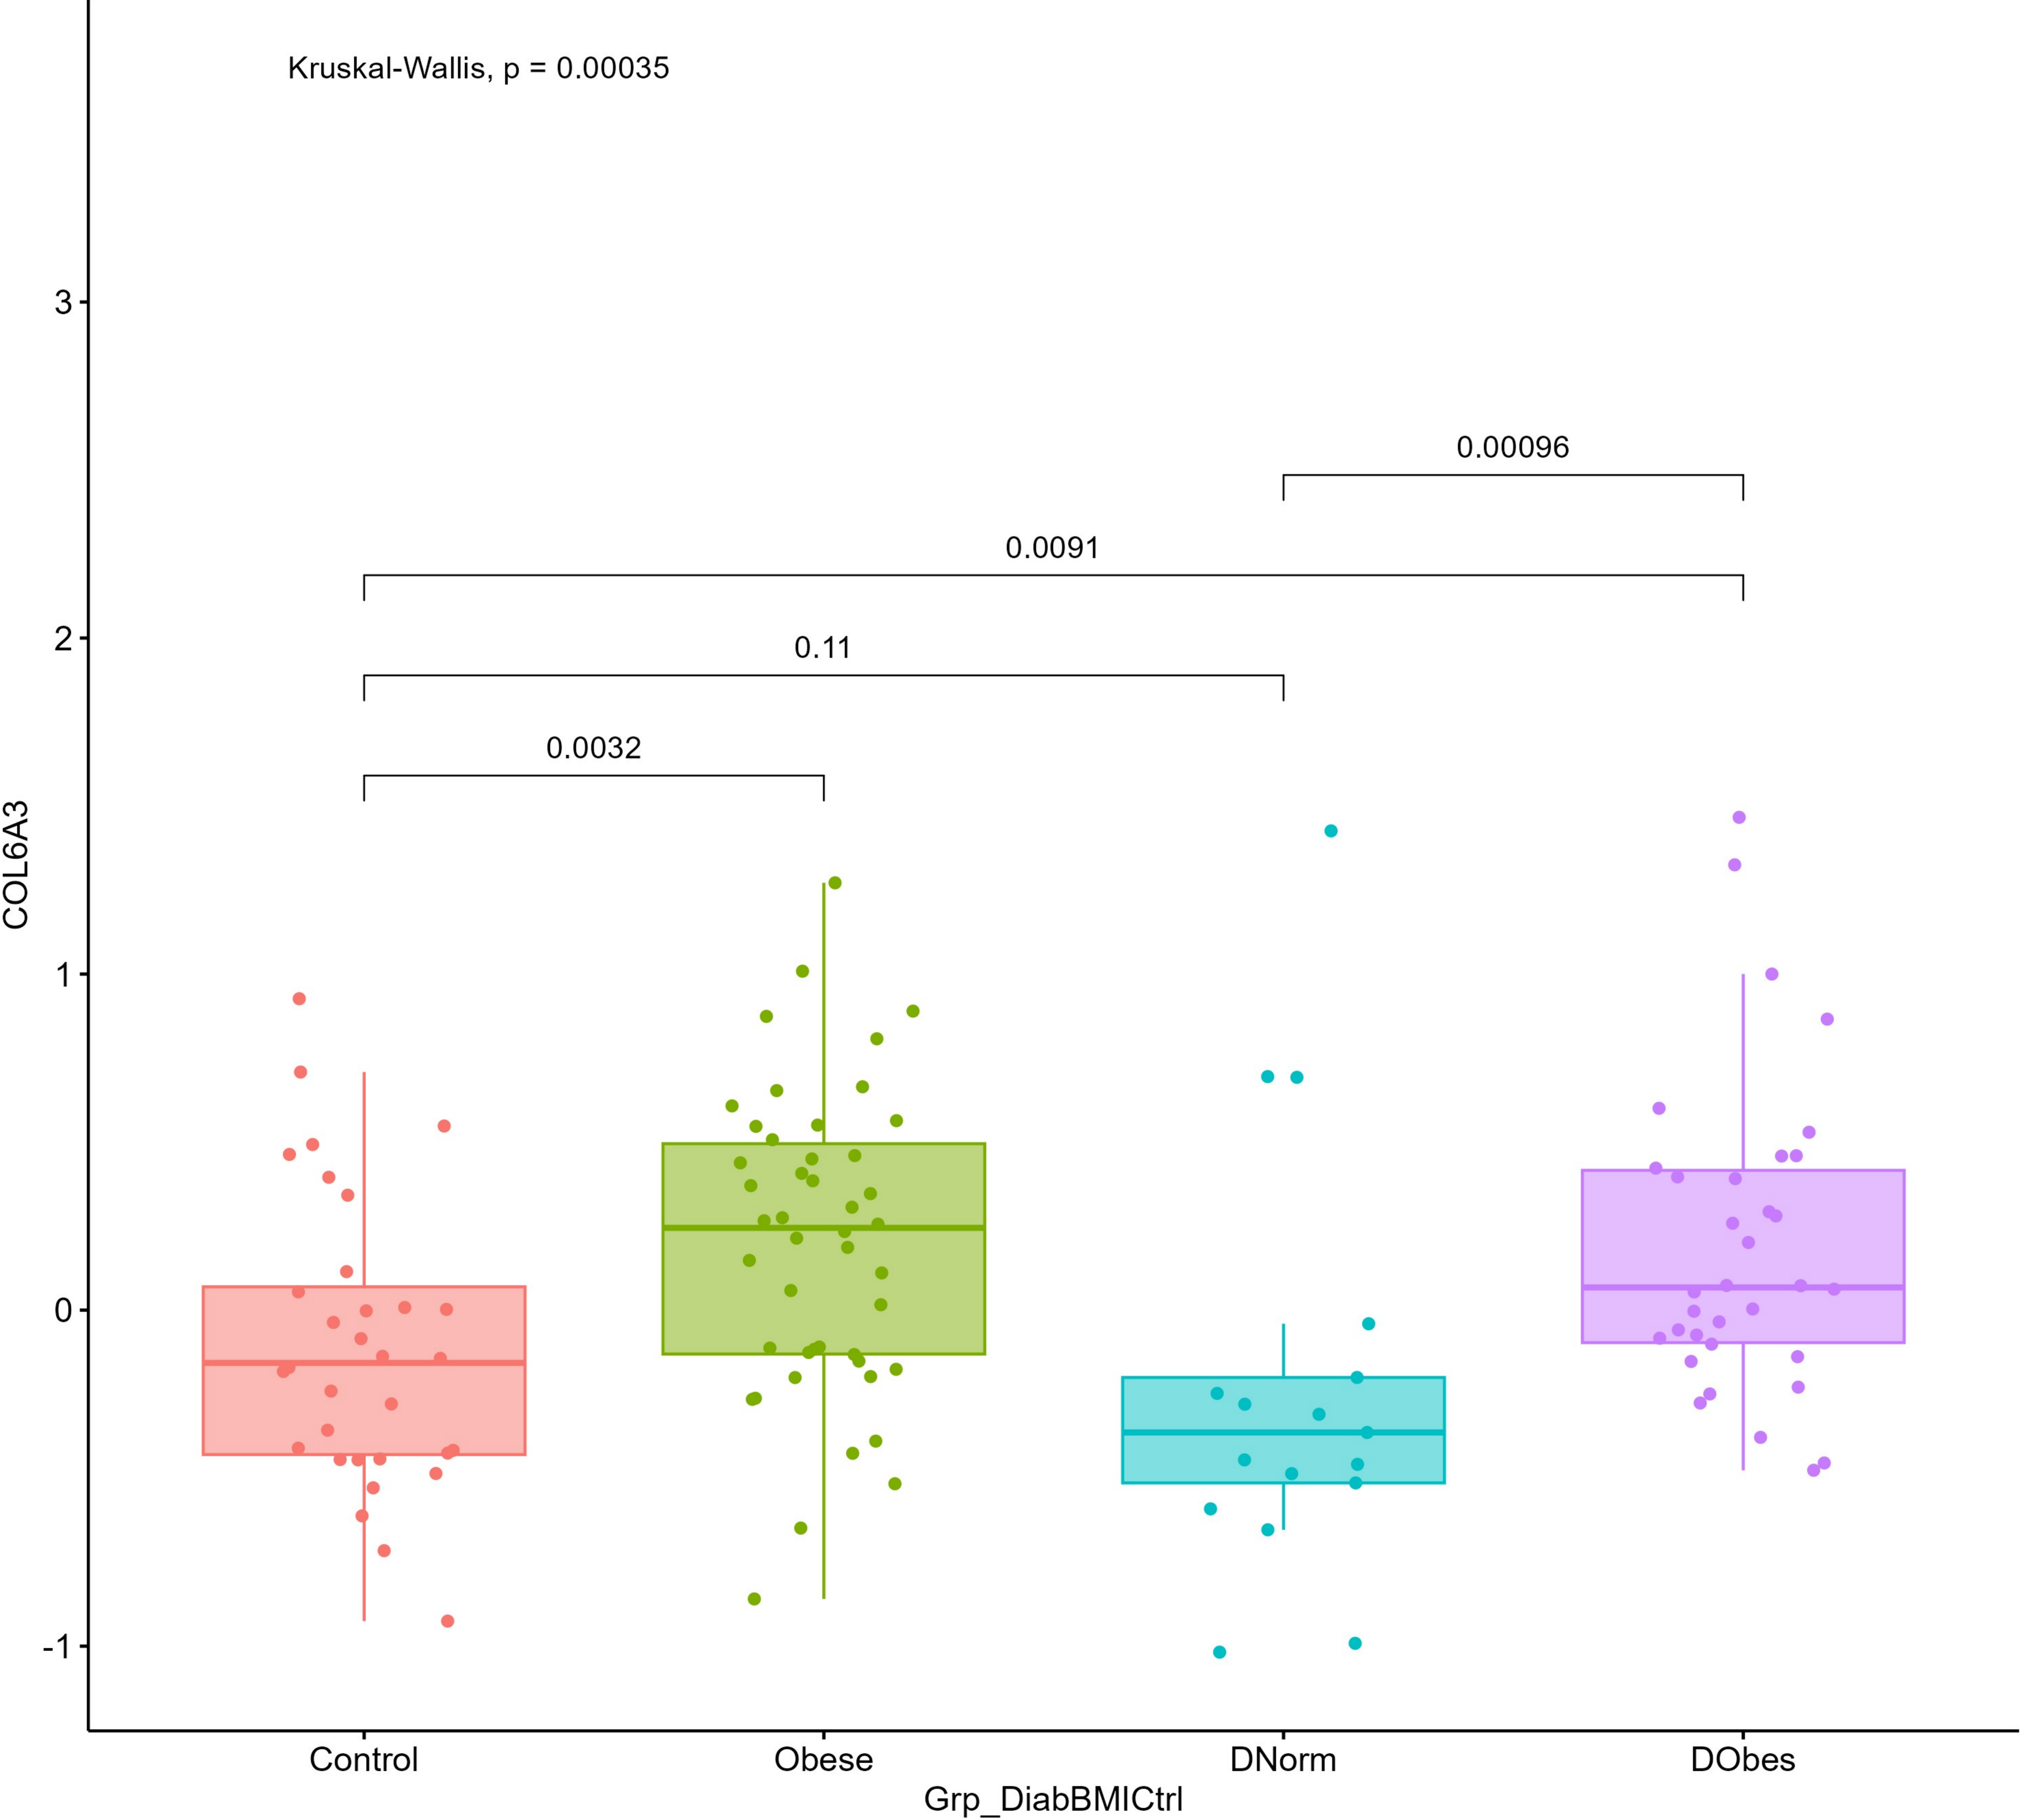

# Grp\_DiabBMICtrl

Grp\_DiabBMICtrl Control Obese DNorm DObes

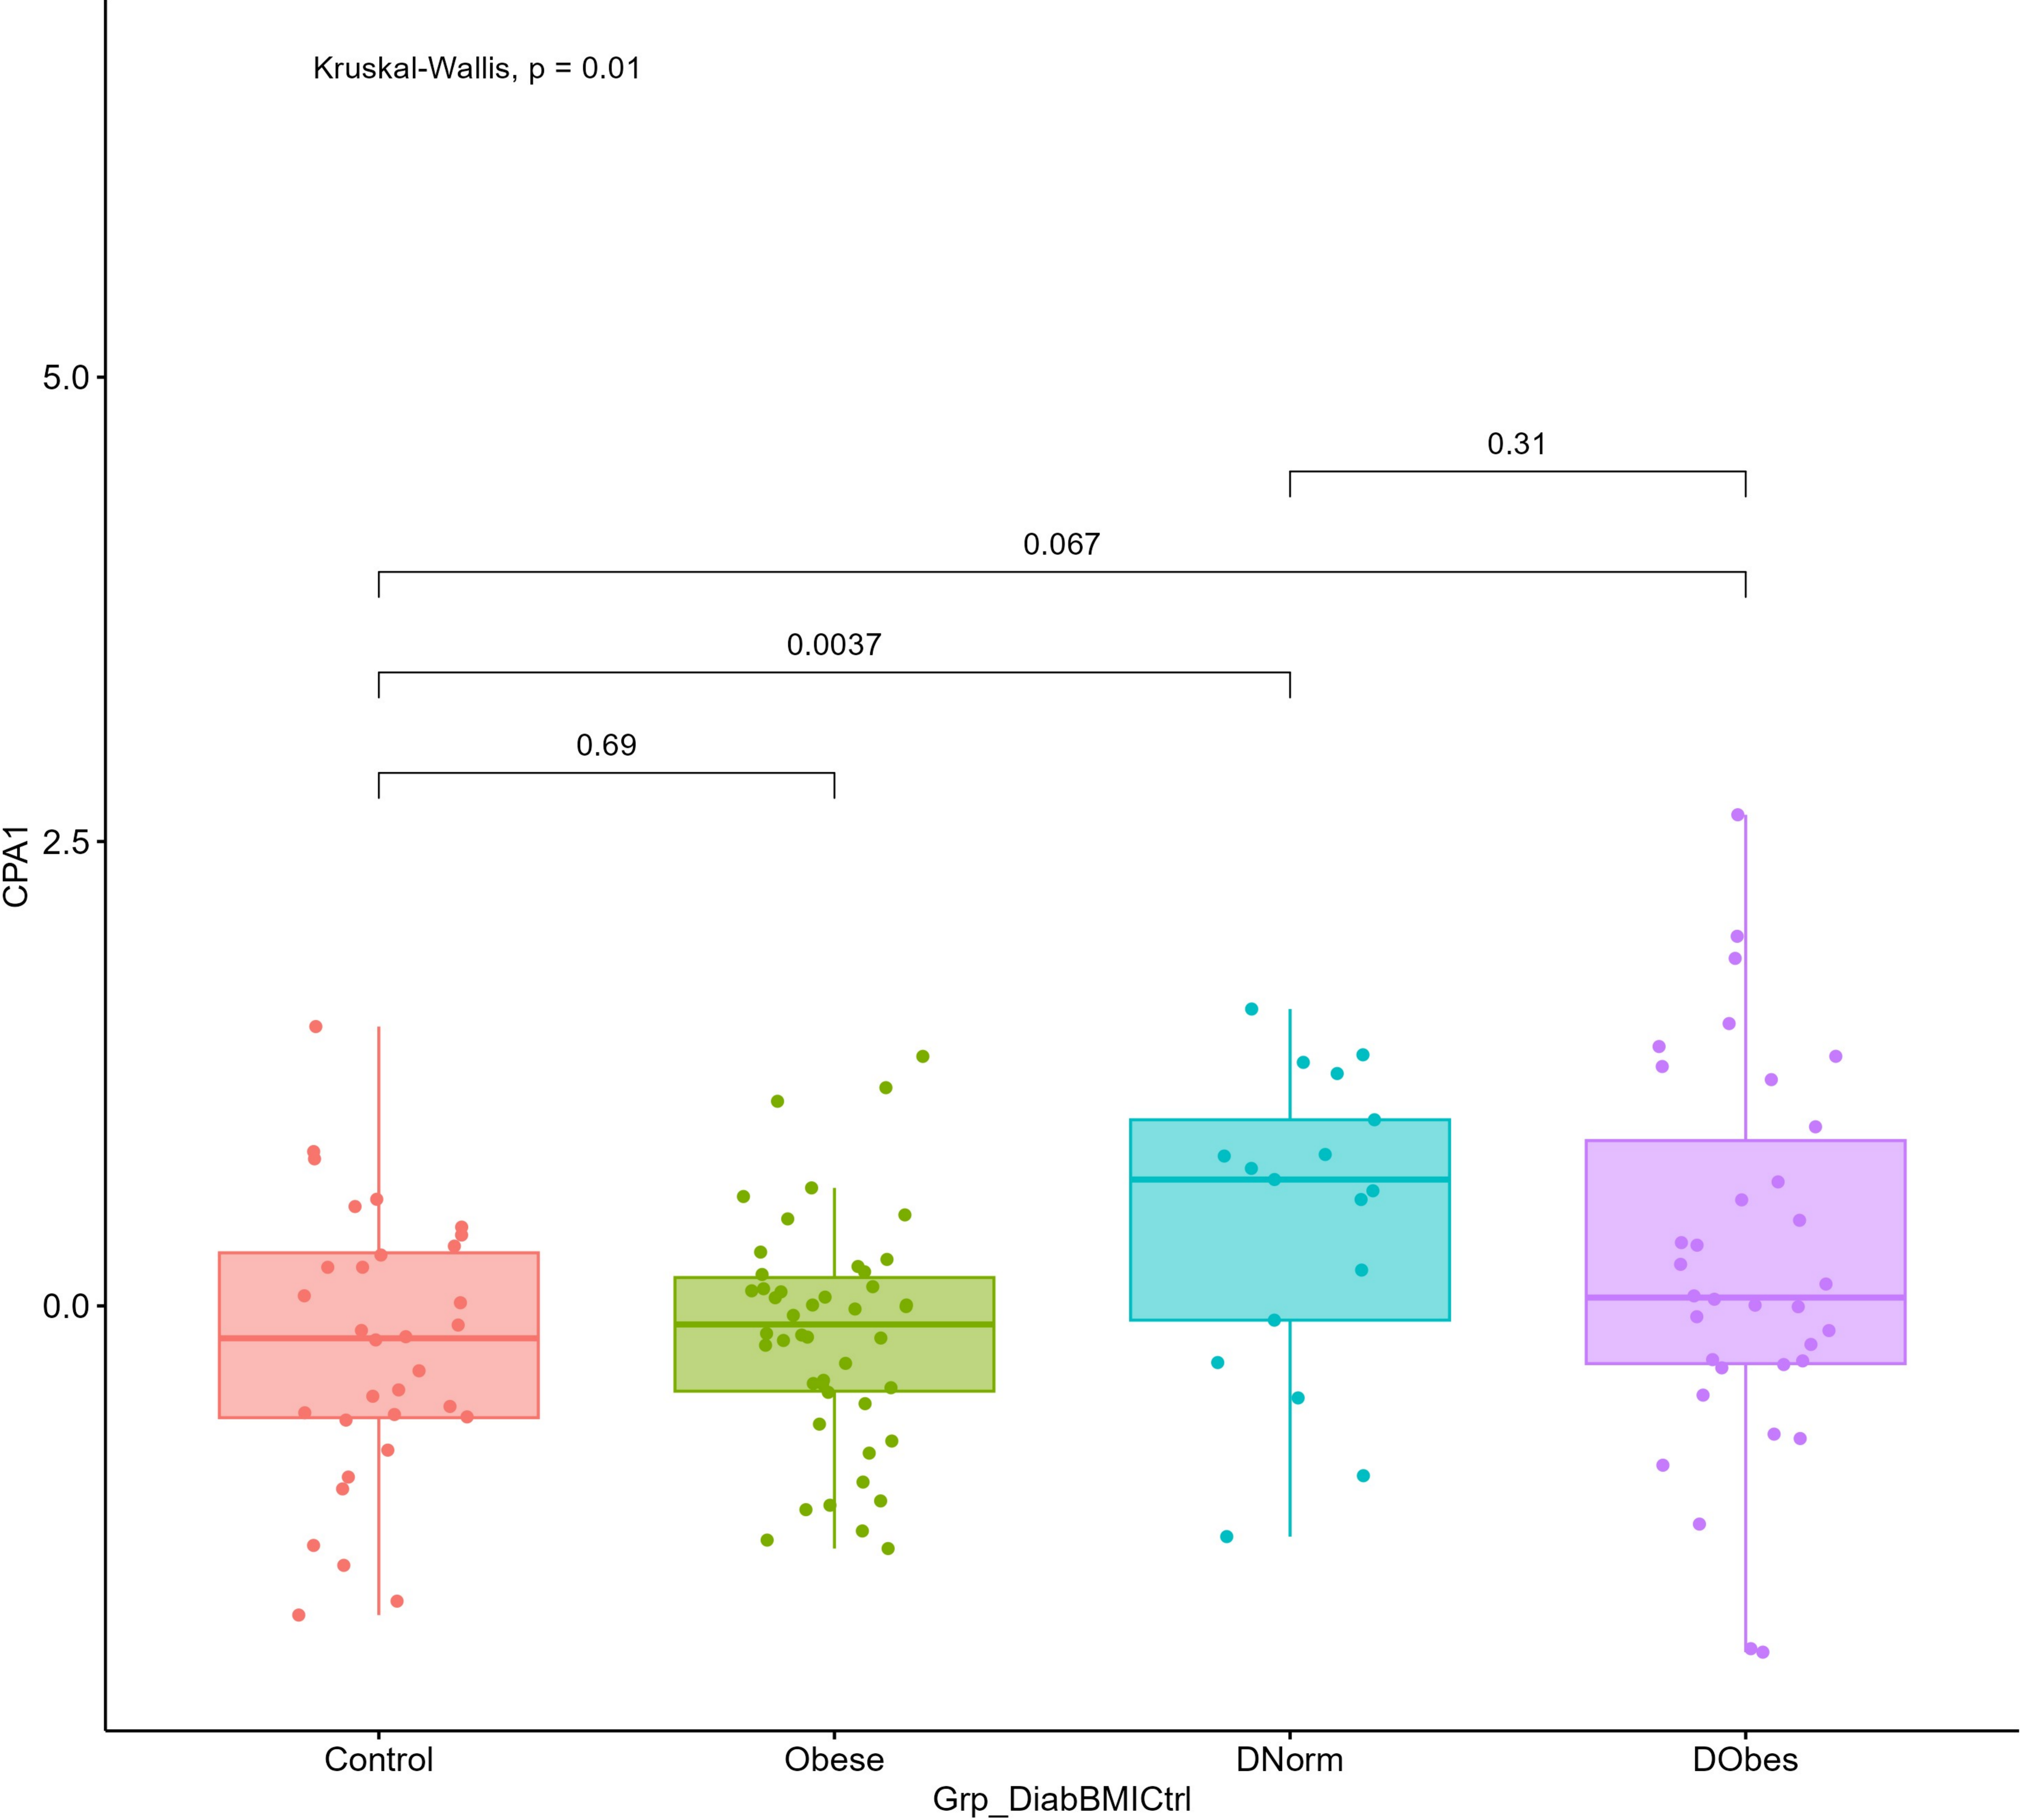

# Grp\_DiabBMICtrl

Grp\_DiabBMICtrl Control Obese DNorm DObes

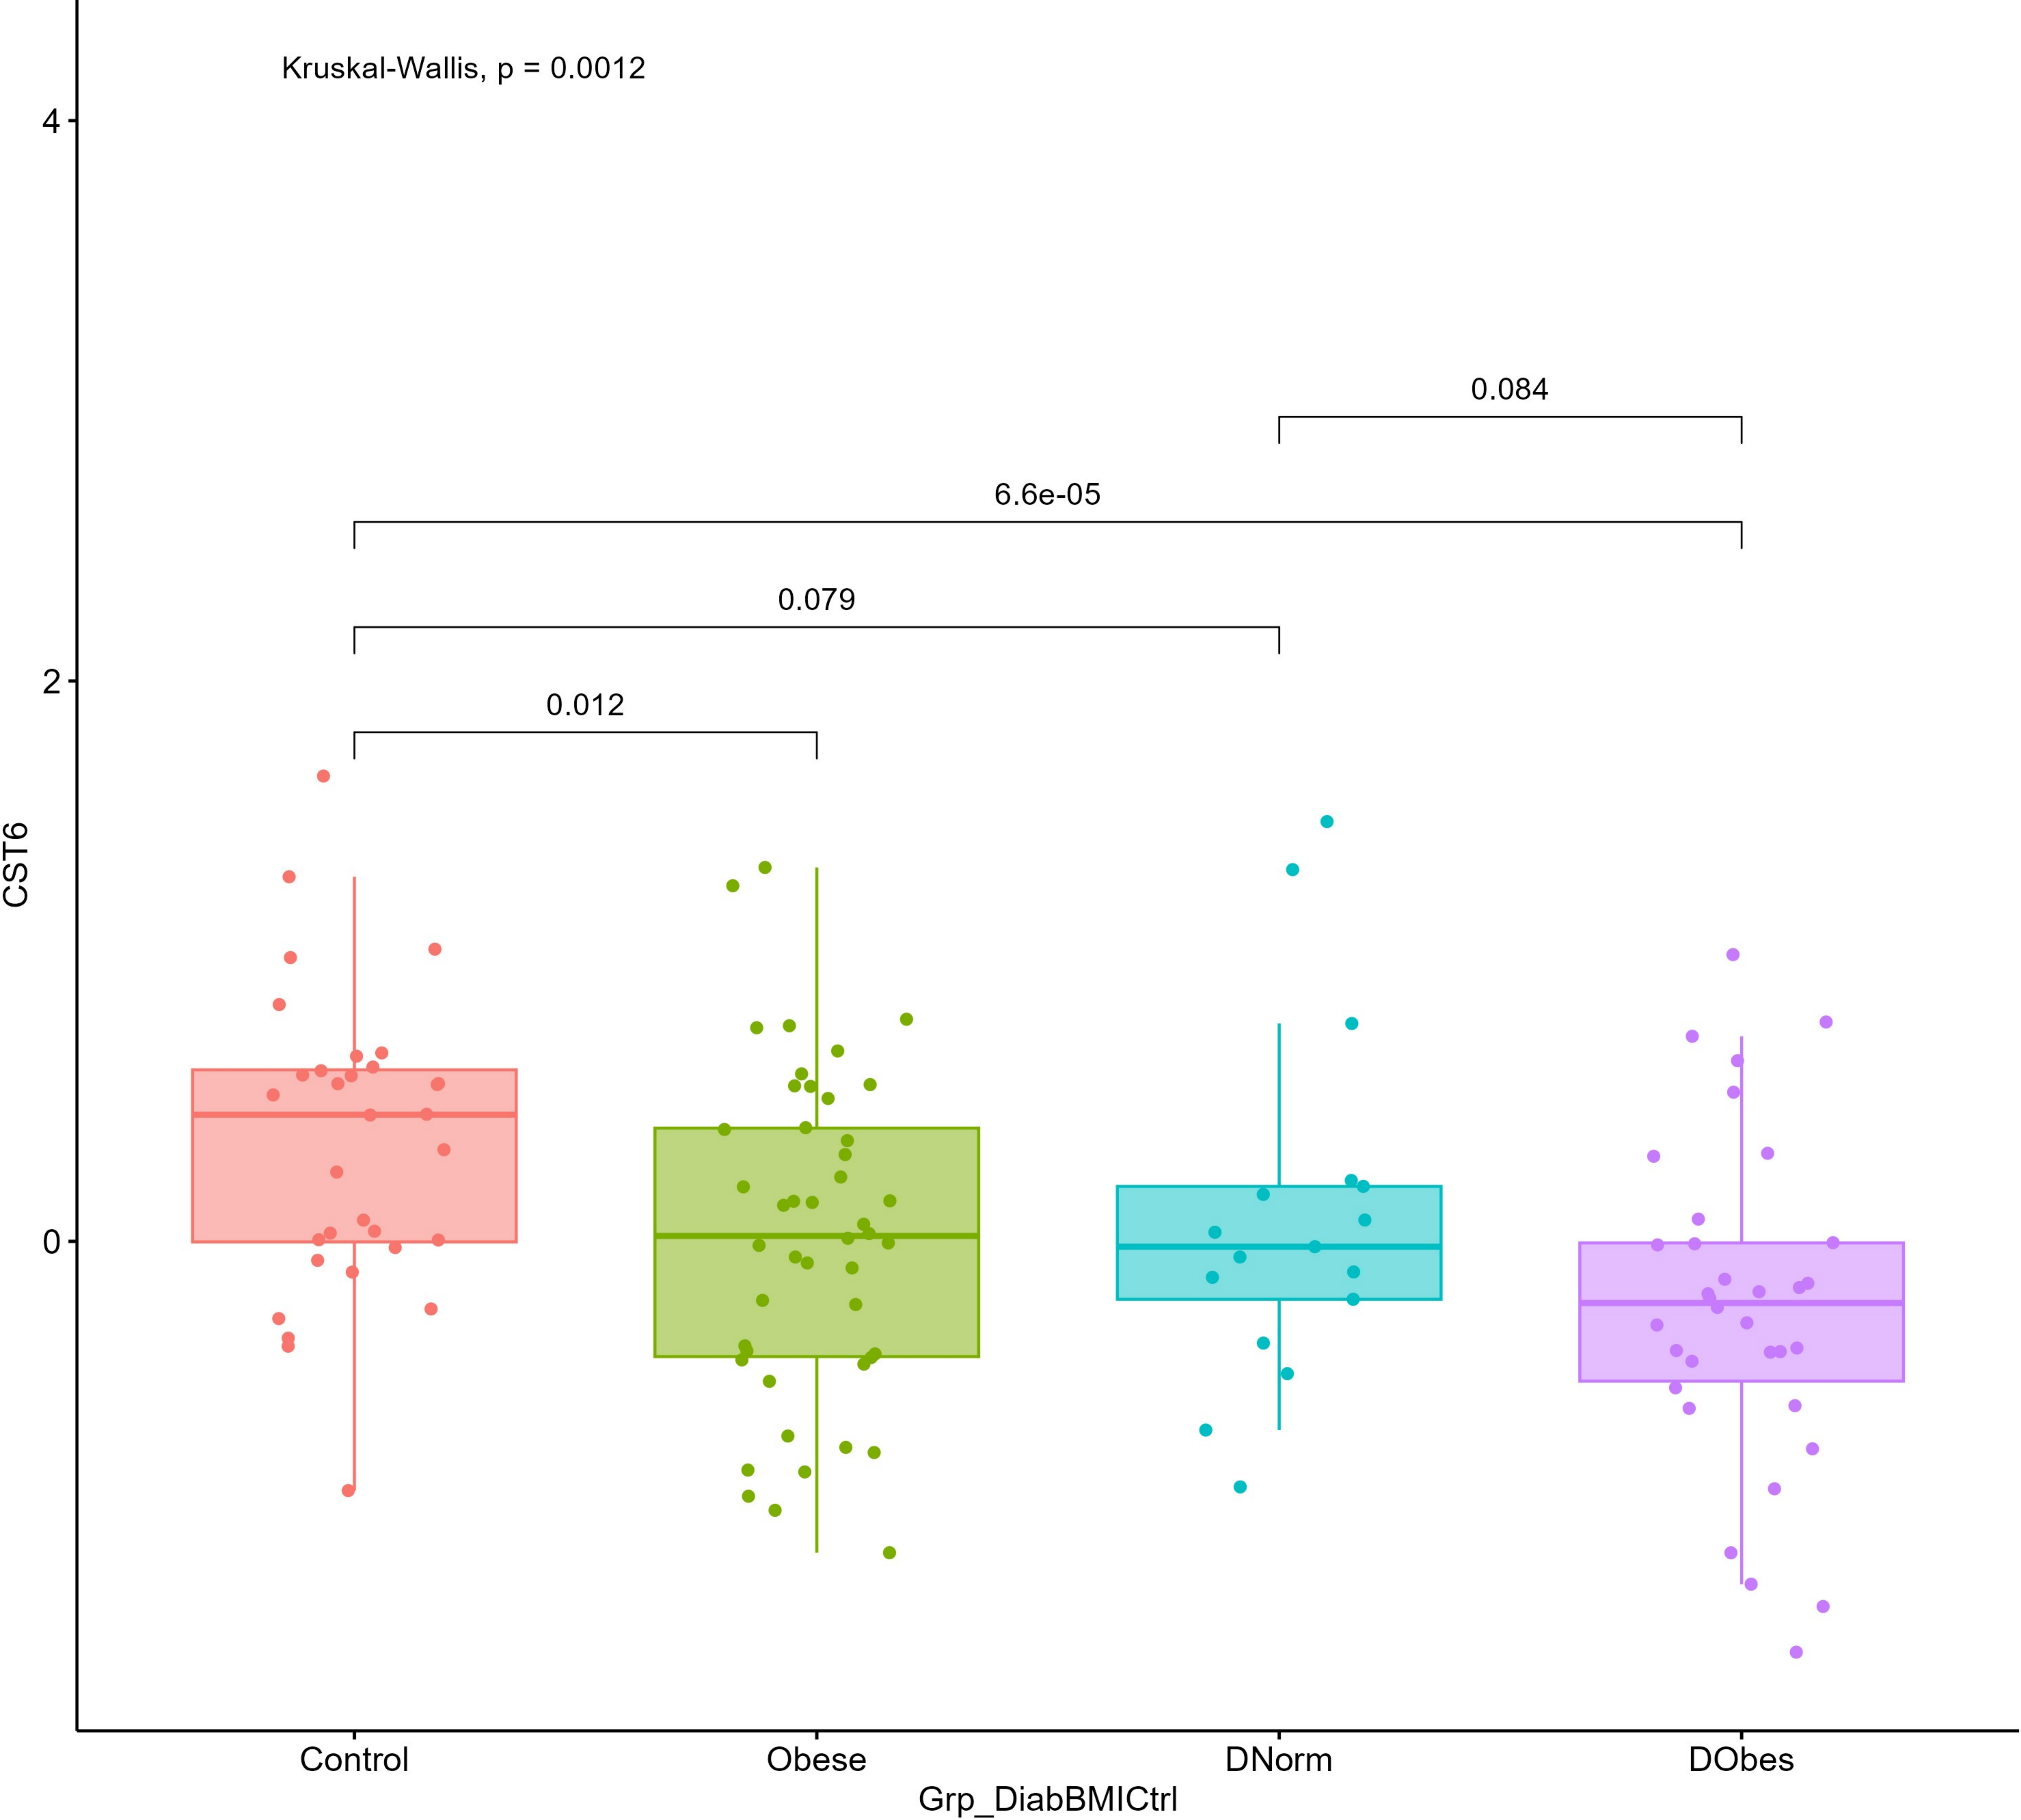

# Grp\_DiabBMICtrl

Grp\_DiabBMICtrl Control Obese DNorm DObes

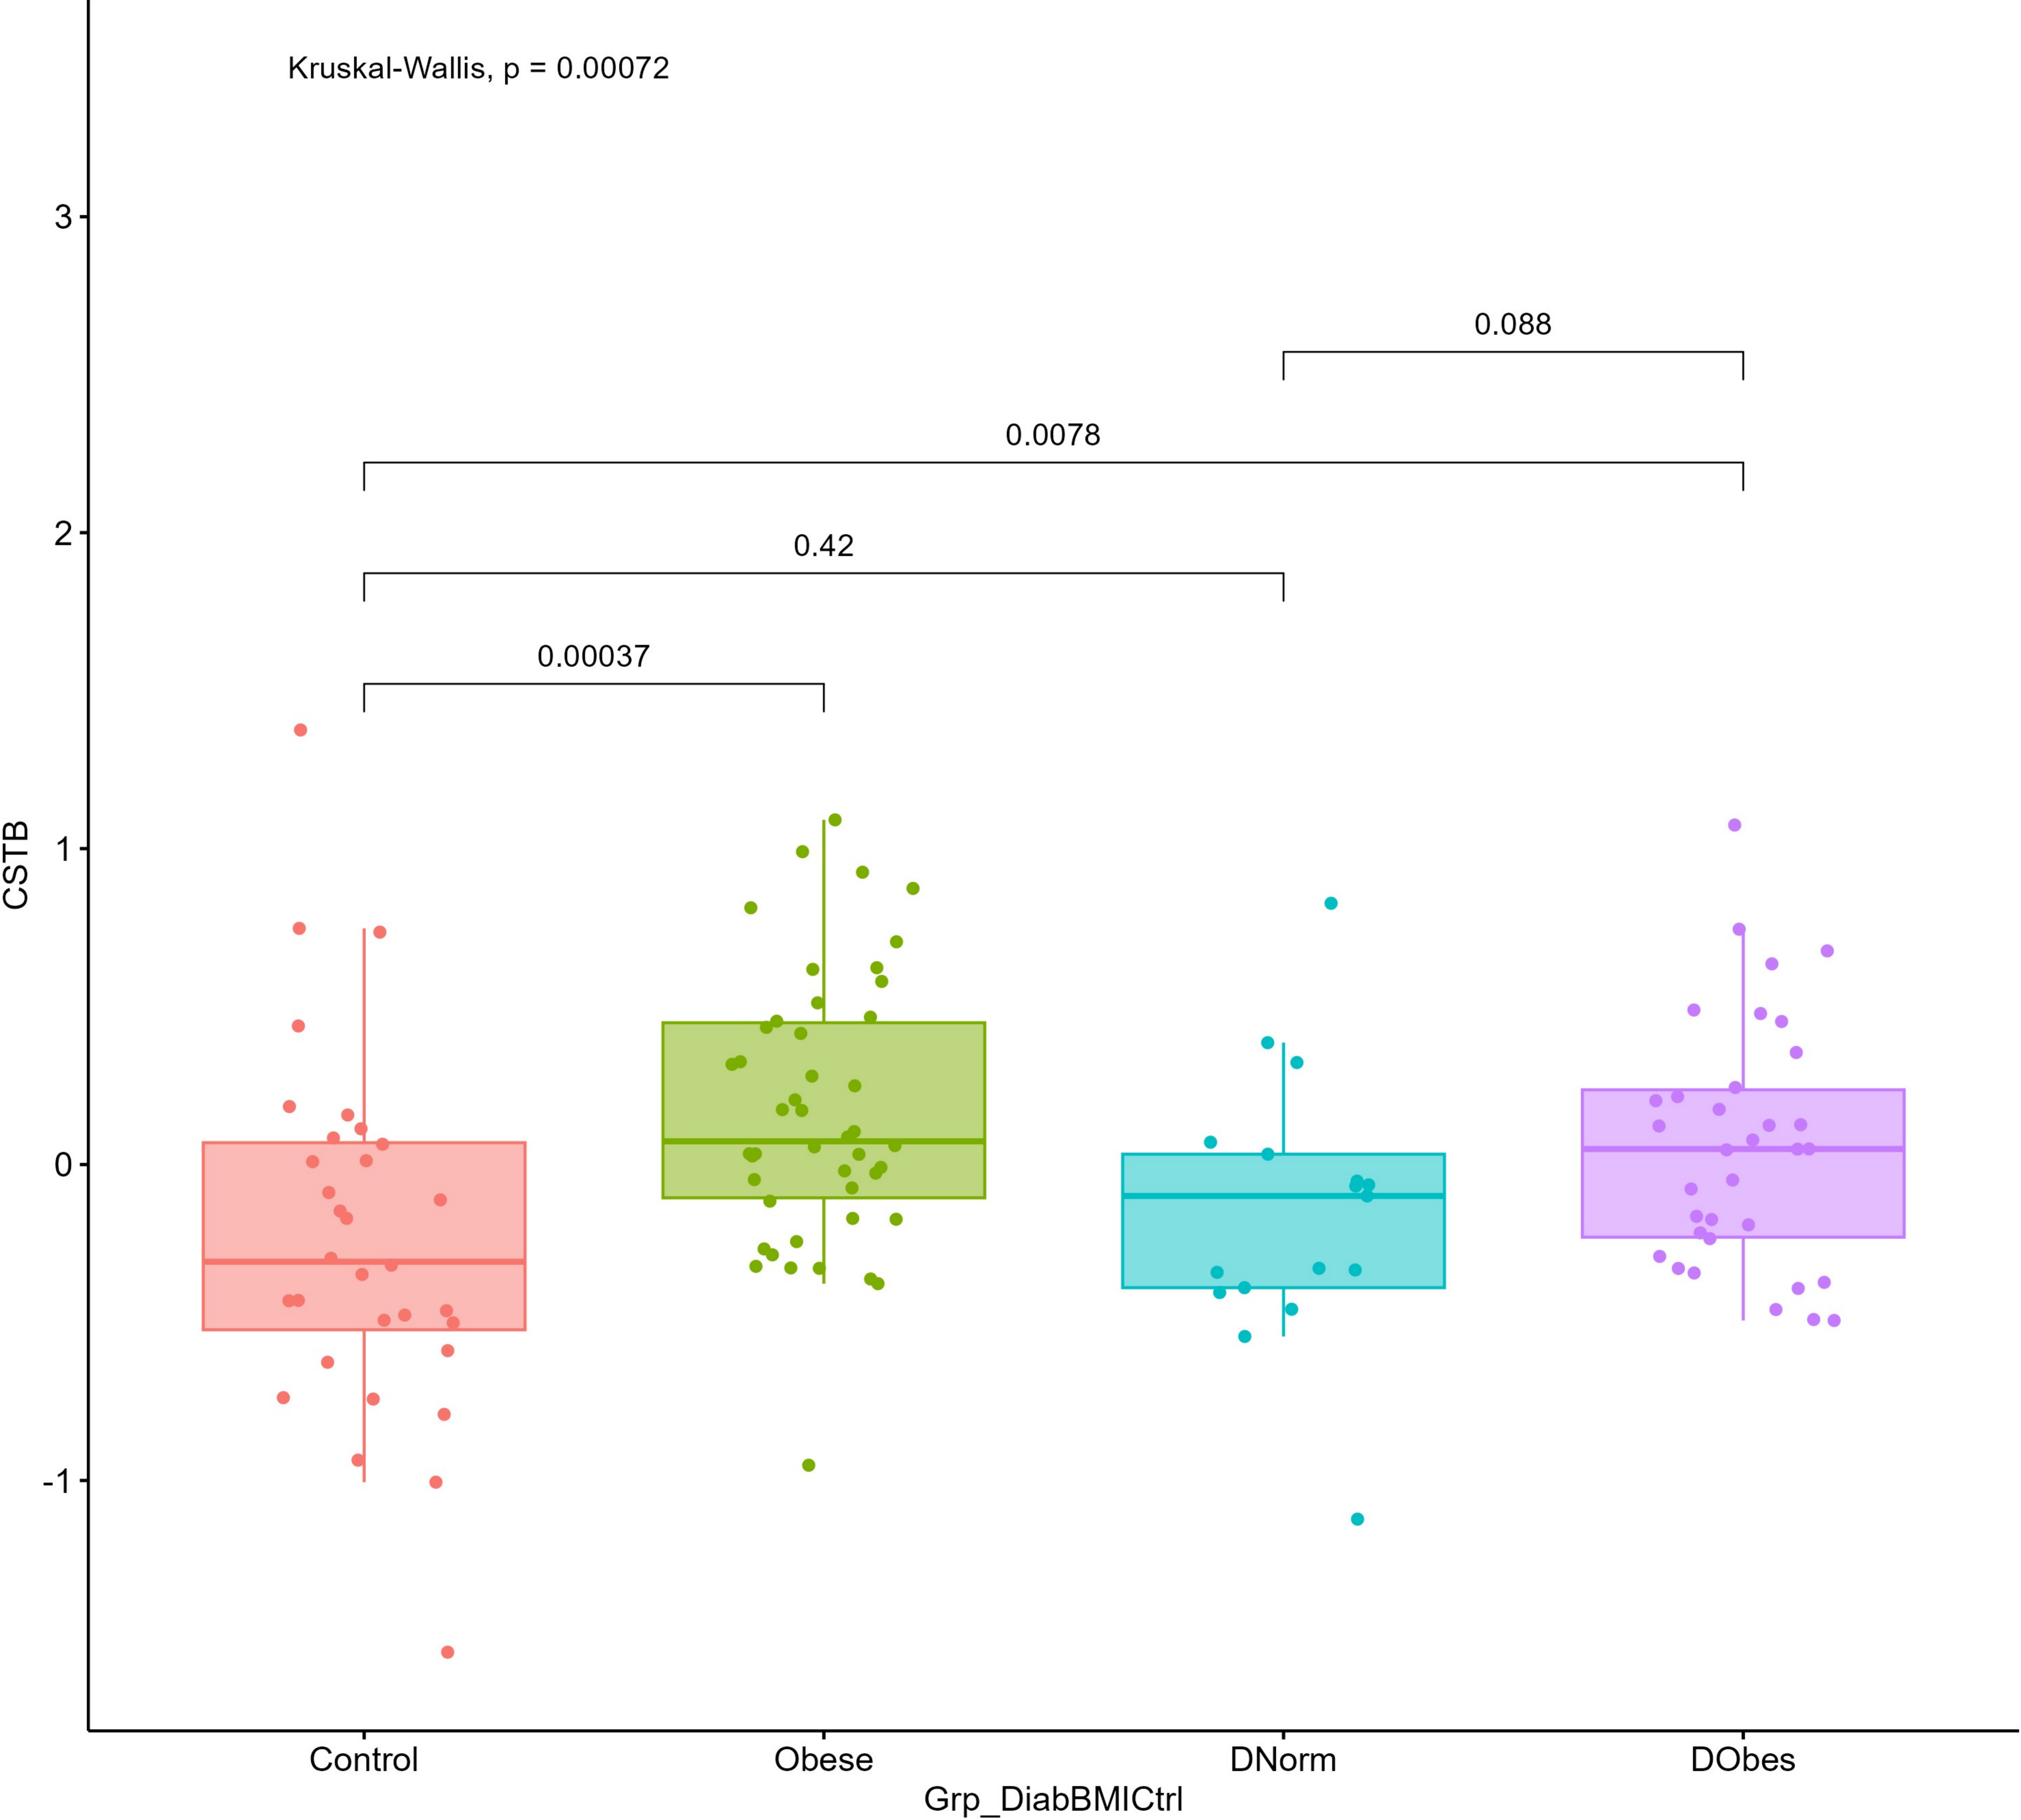

# Grp\_DiabBMICtrl

Grp\_DiabBMICtrl Control Obese DNorm DObes

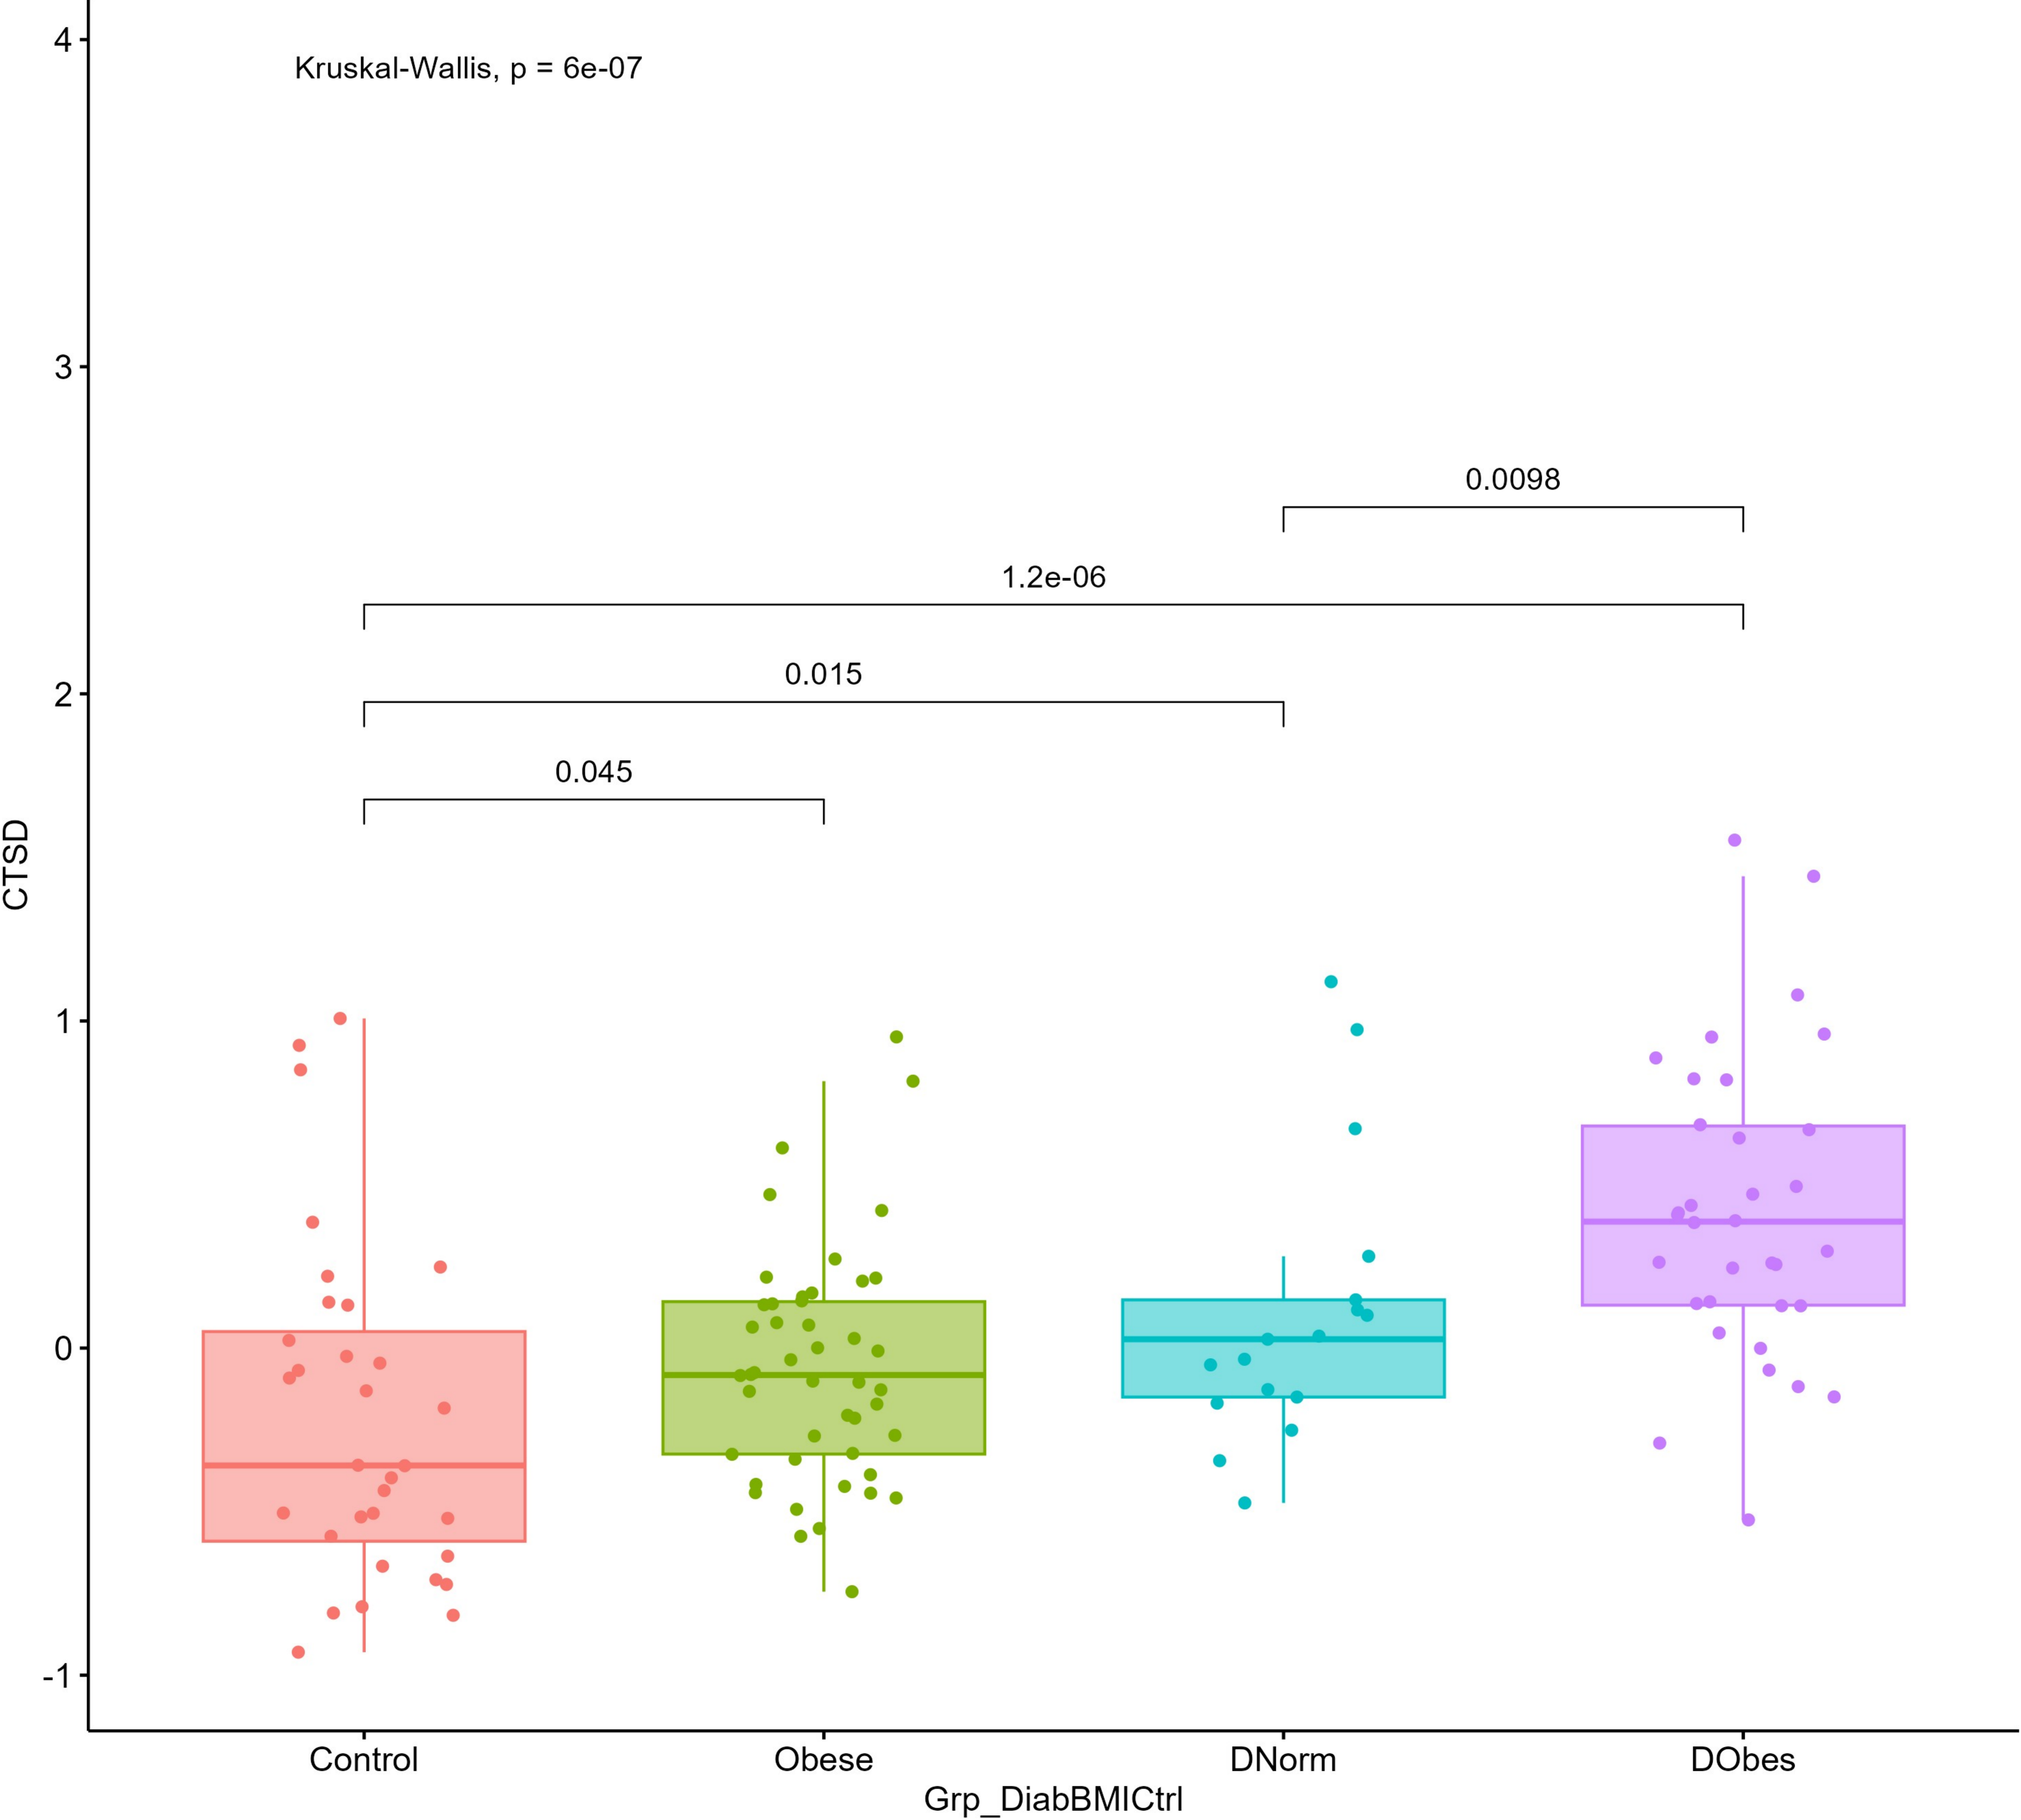

# Grp\_DiabBMICtrl

Grp\_DiabBMICtrl Control Obese DNorm DObes

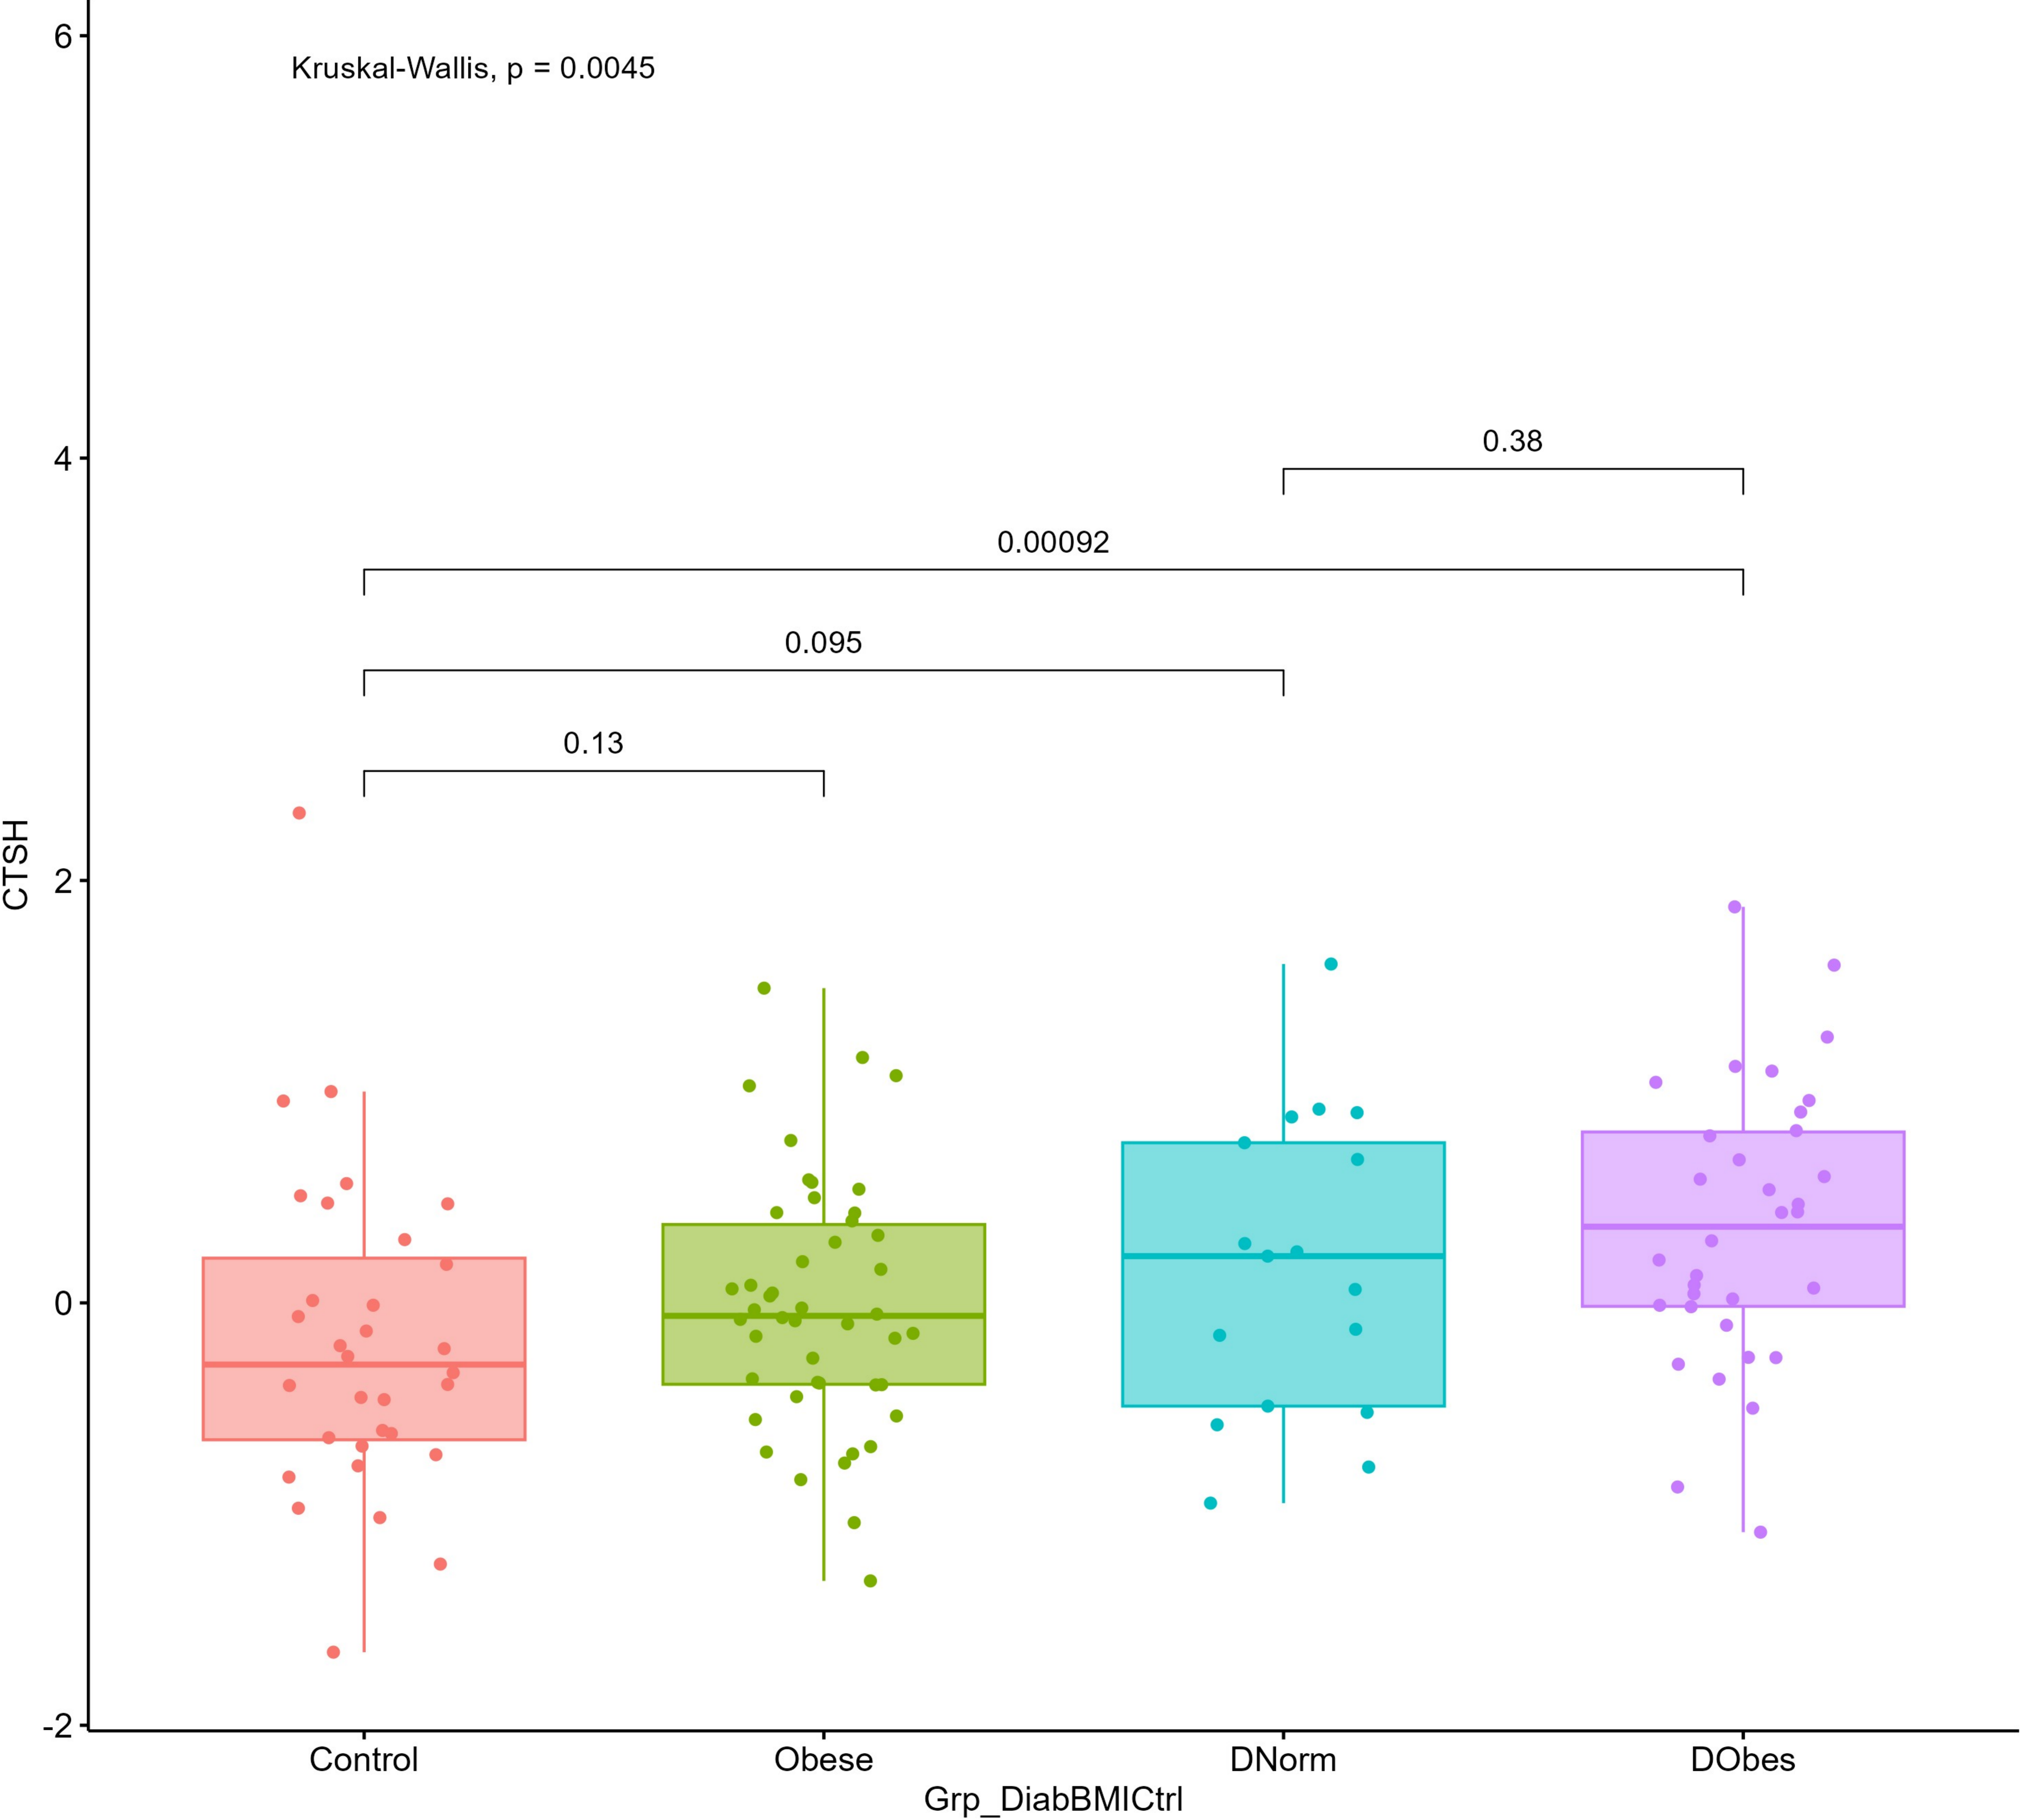

# Grp\_DiabBMICtrl

Grp\_DiabBMICtrl Control Obese DNorm DObes

Kruskal-Wallis,  $p = 7.7e-05$

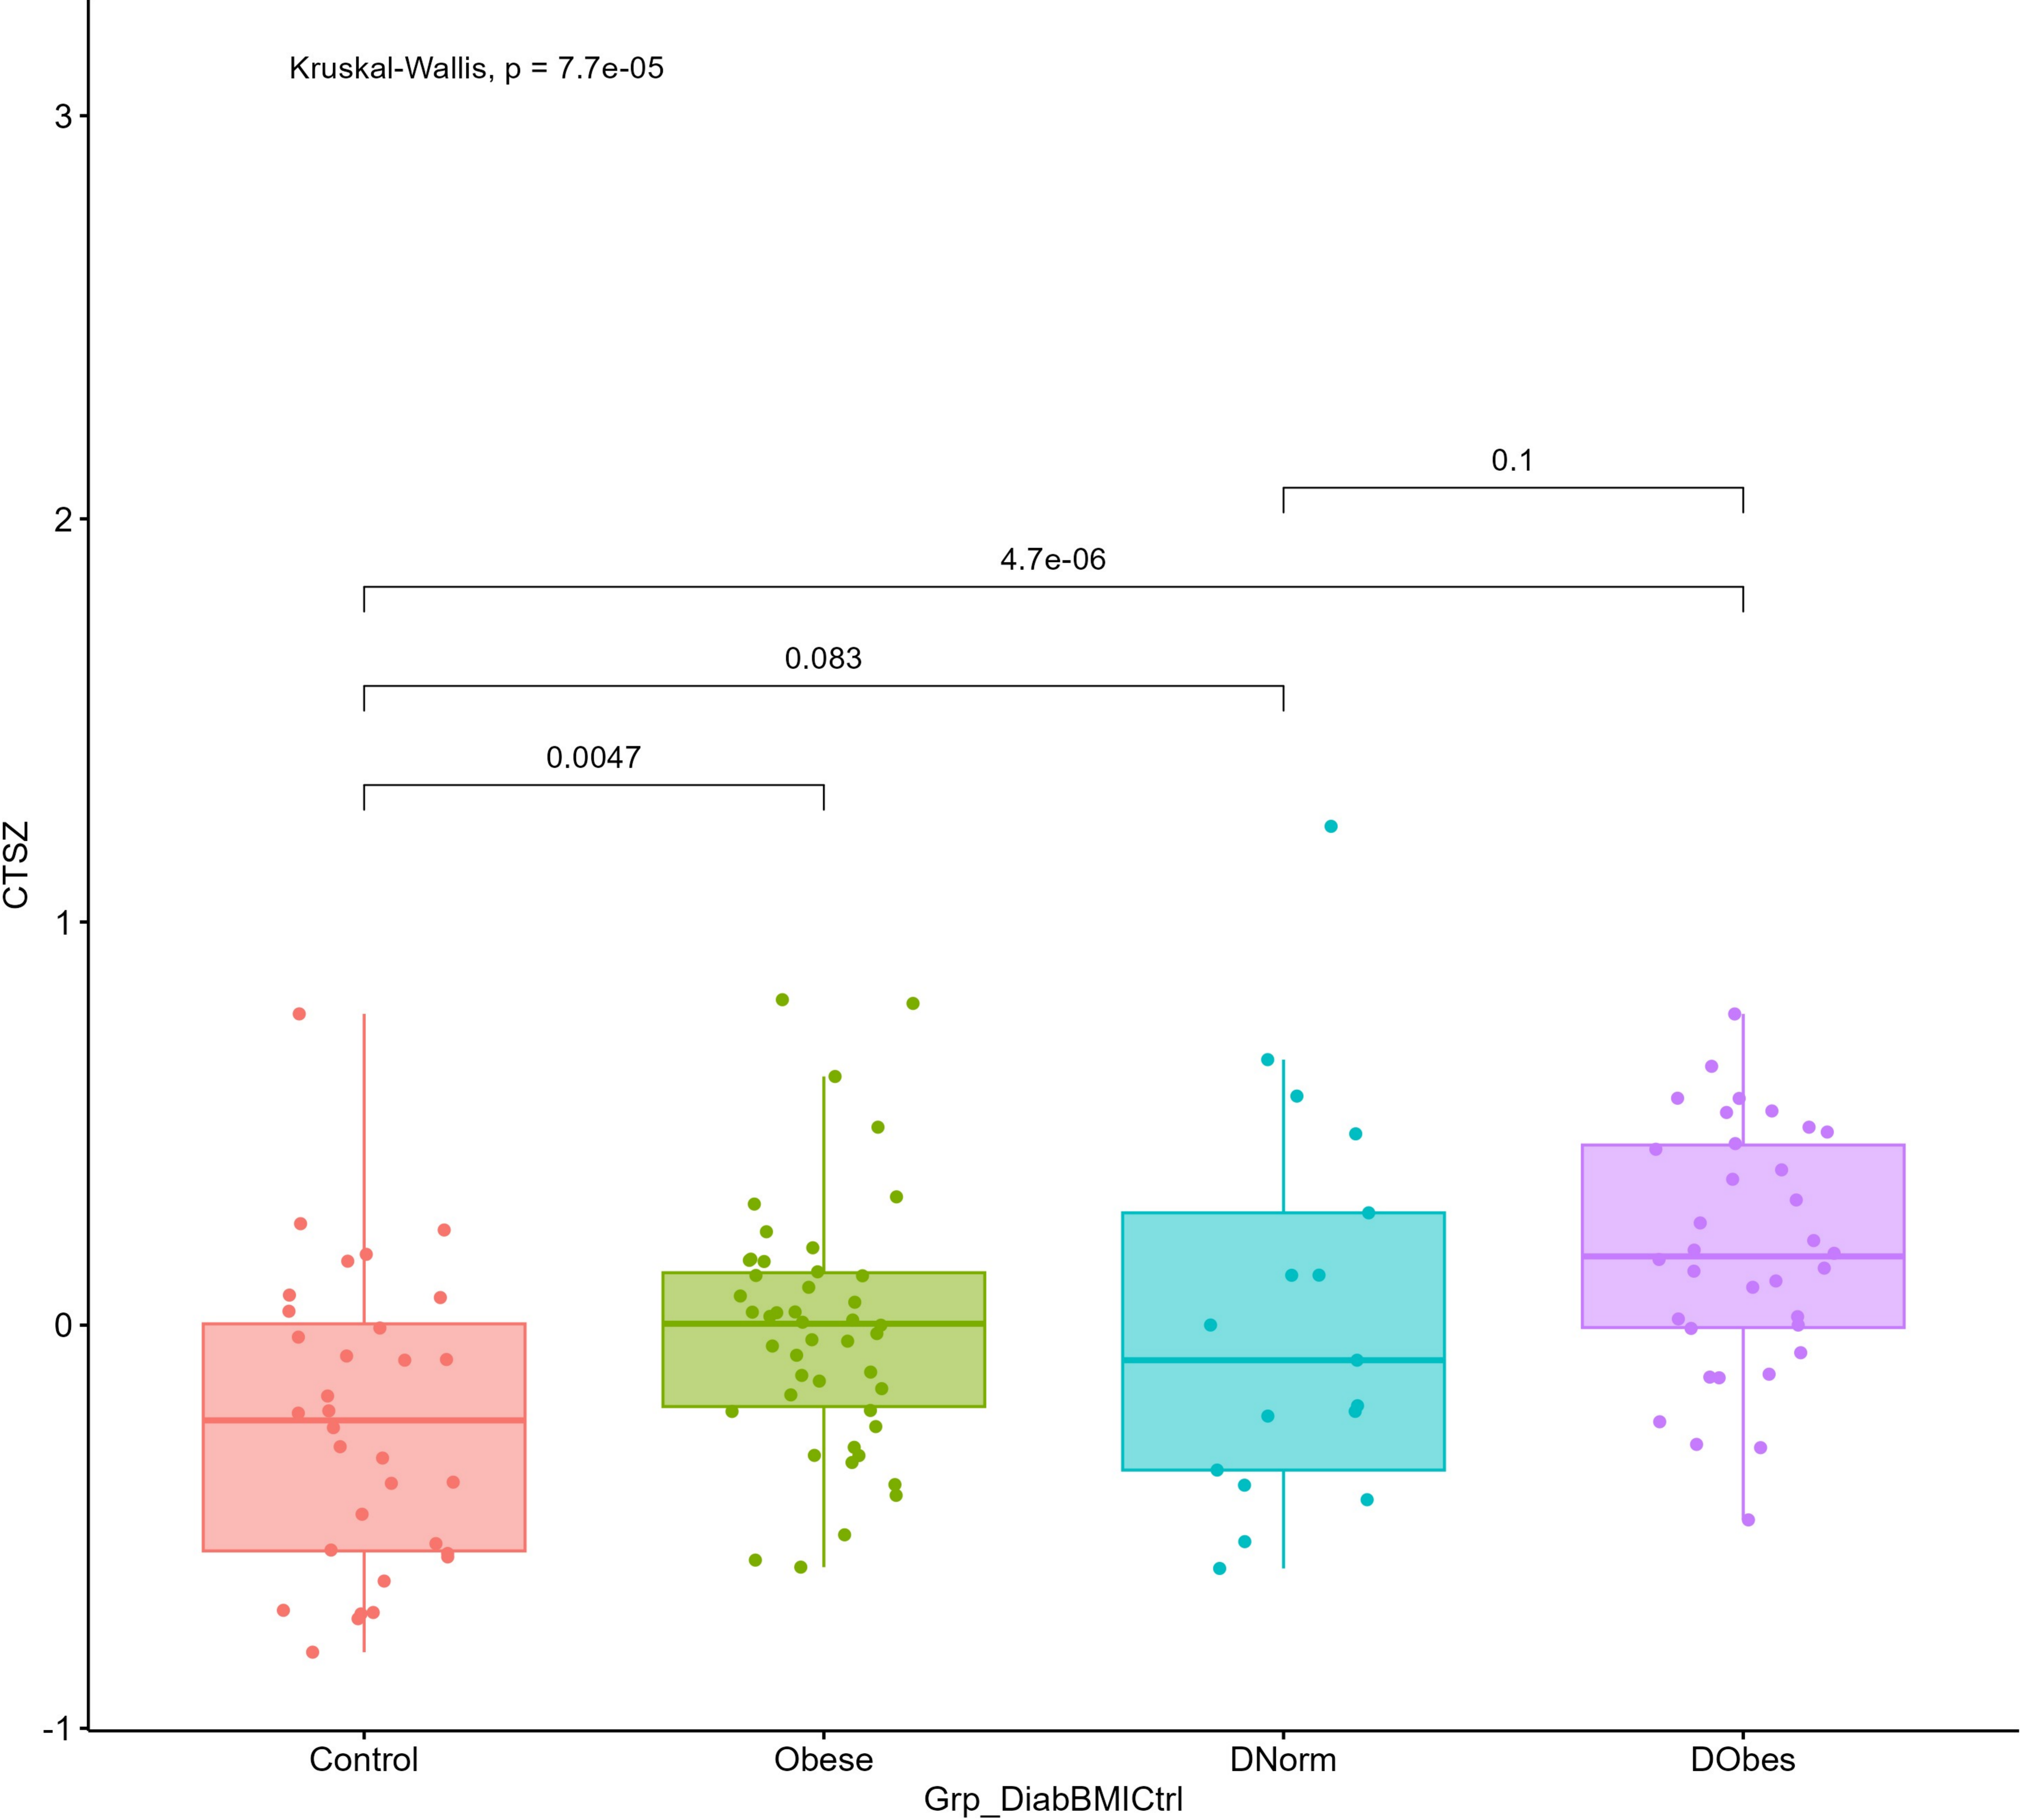

# Grp\_DiabBMICtrl

Grp\_DiabBMICtrl Control Obese DNorm DObes

Kruskal-Wallis, p = 0.0082

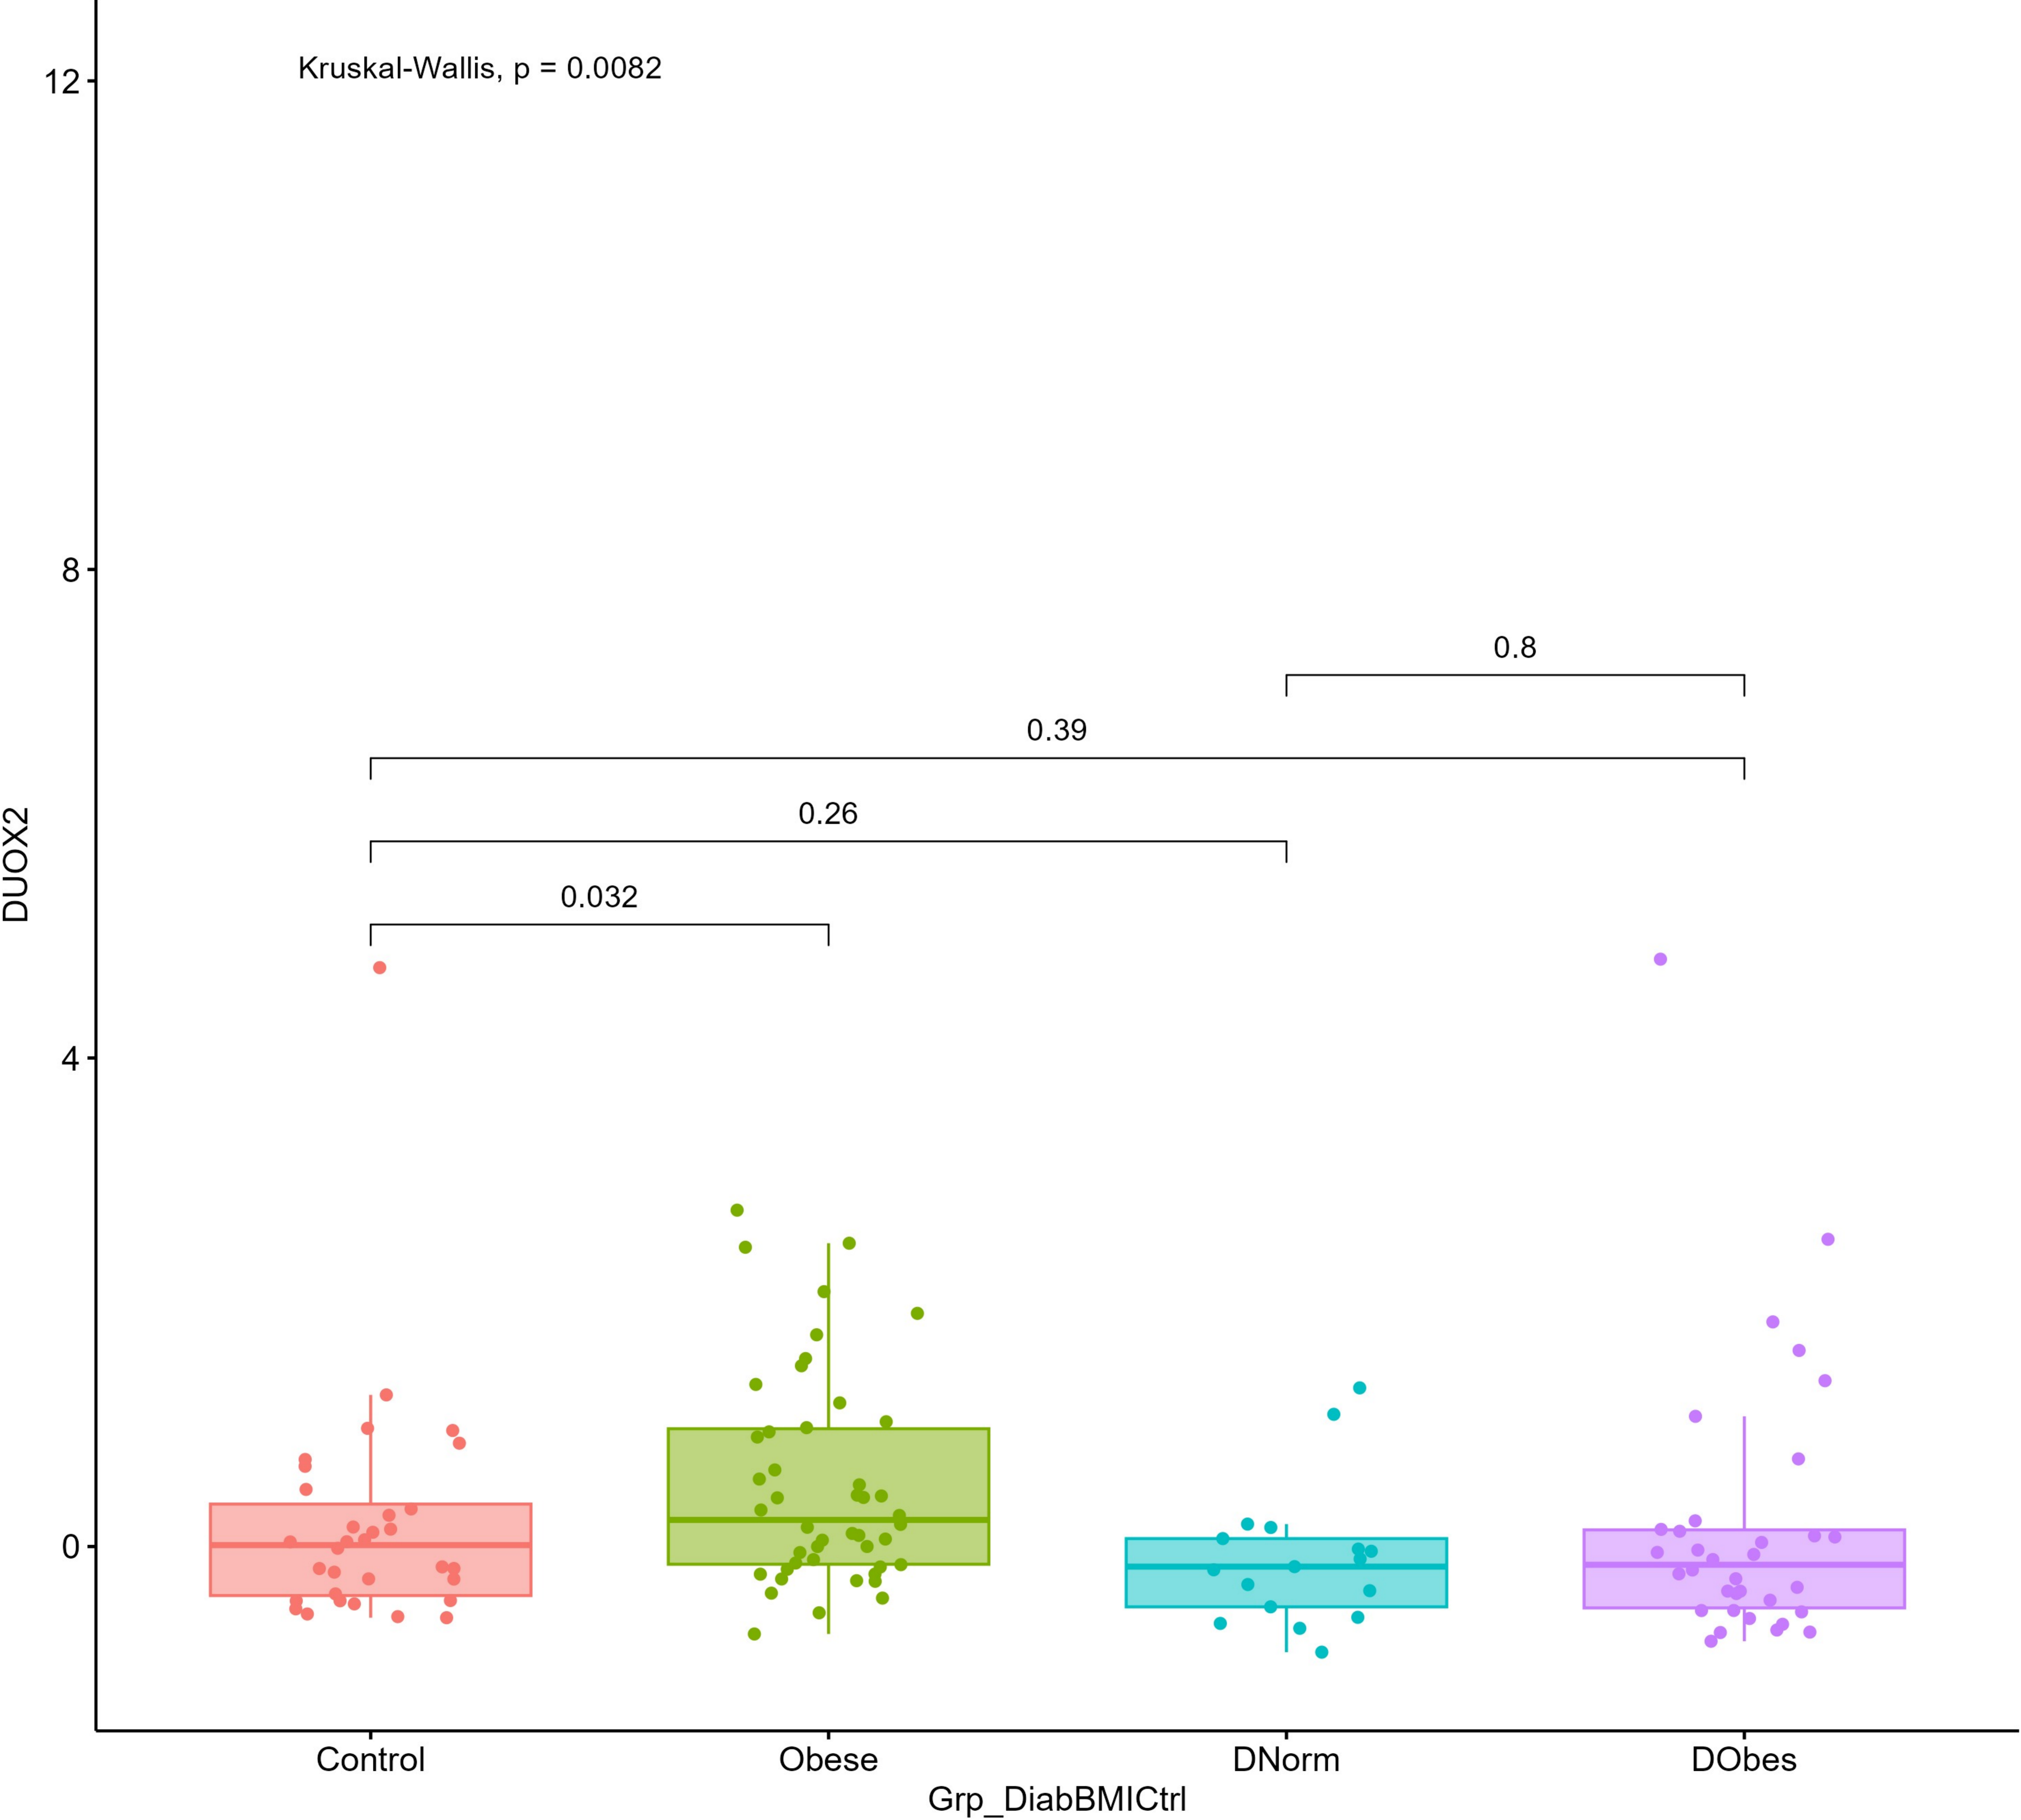

# Grp\_DiabBMICtrl

Grp\_DiabBMICtrl Control Obese DNorm DObes

Kruskal-Wallis, p = 0.0061

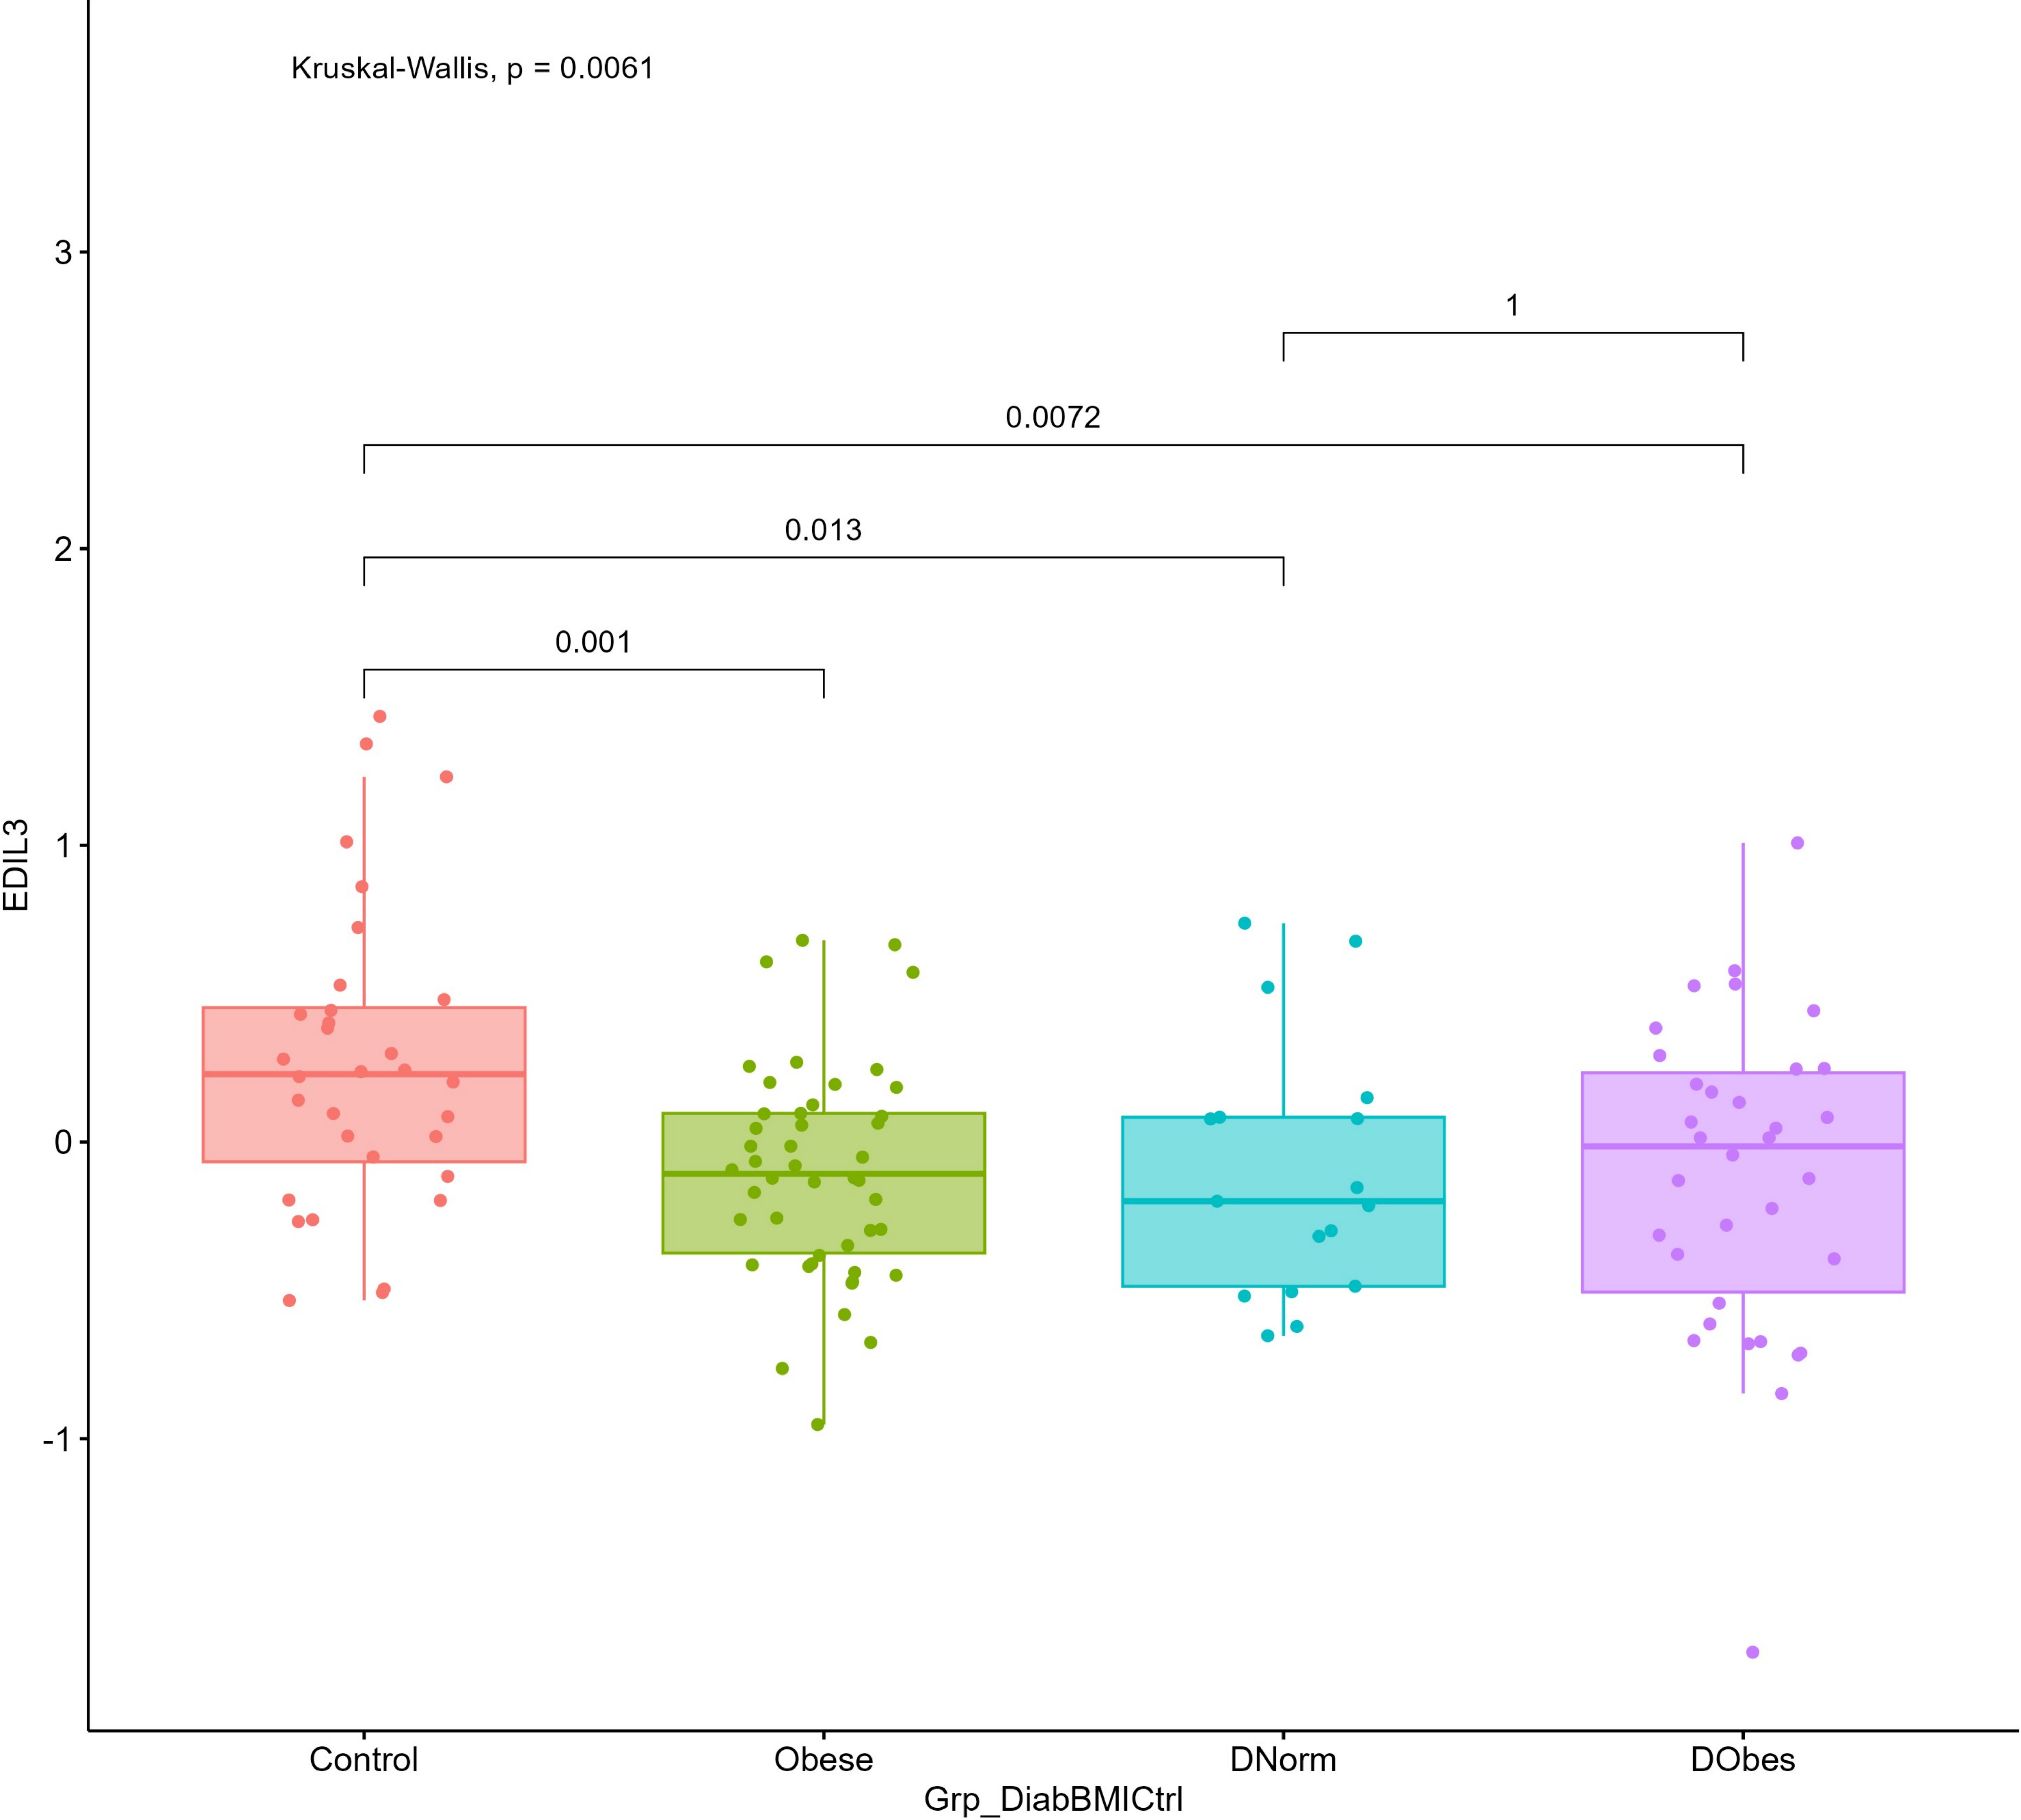

# Grp\_DiabBMICtrl

Grp\_DiabBMICtrl Control Obese DNorm DObes

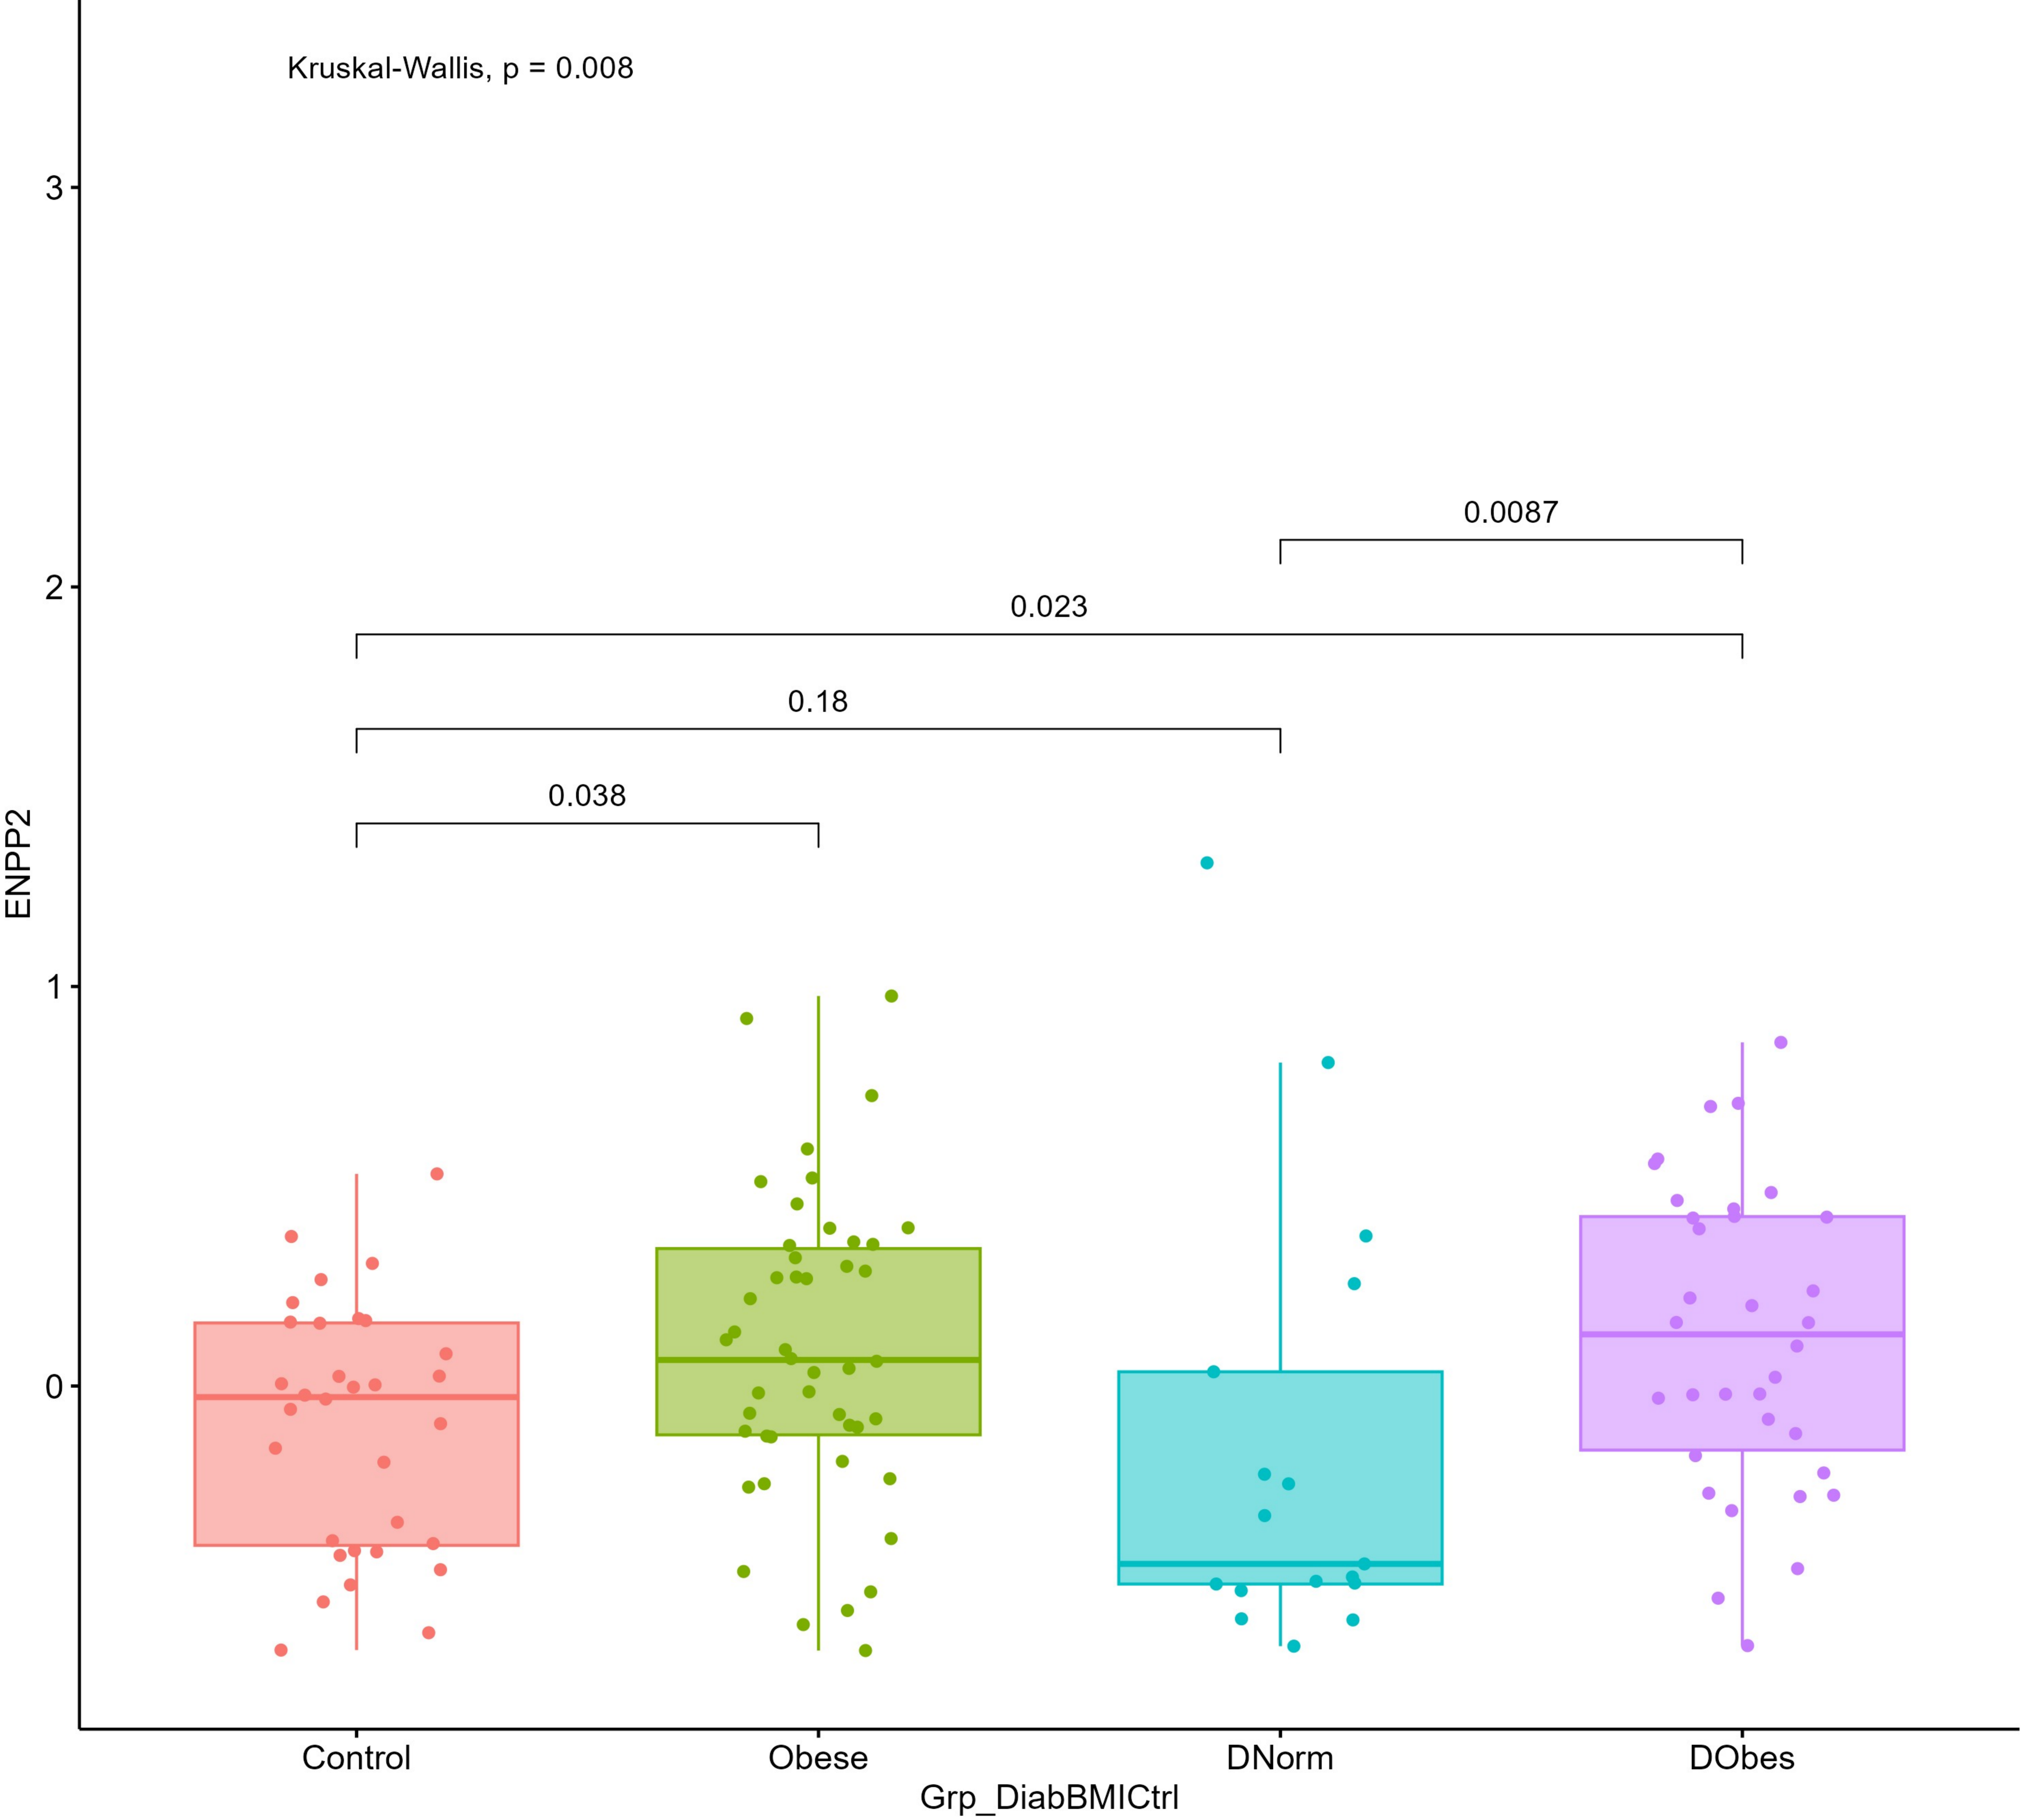

# Grp\_DiabBMICtrl

Grp\_DiabBMICtrl Control Obese DNorm DObes

Kruskal-Wallis, p = 0.00088

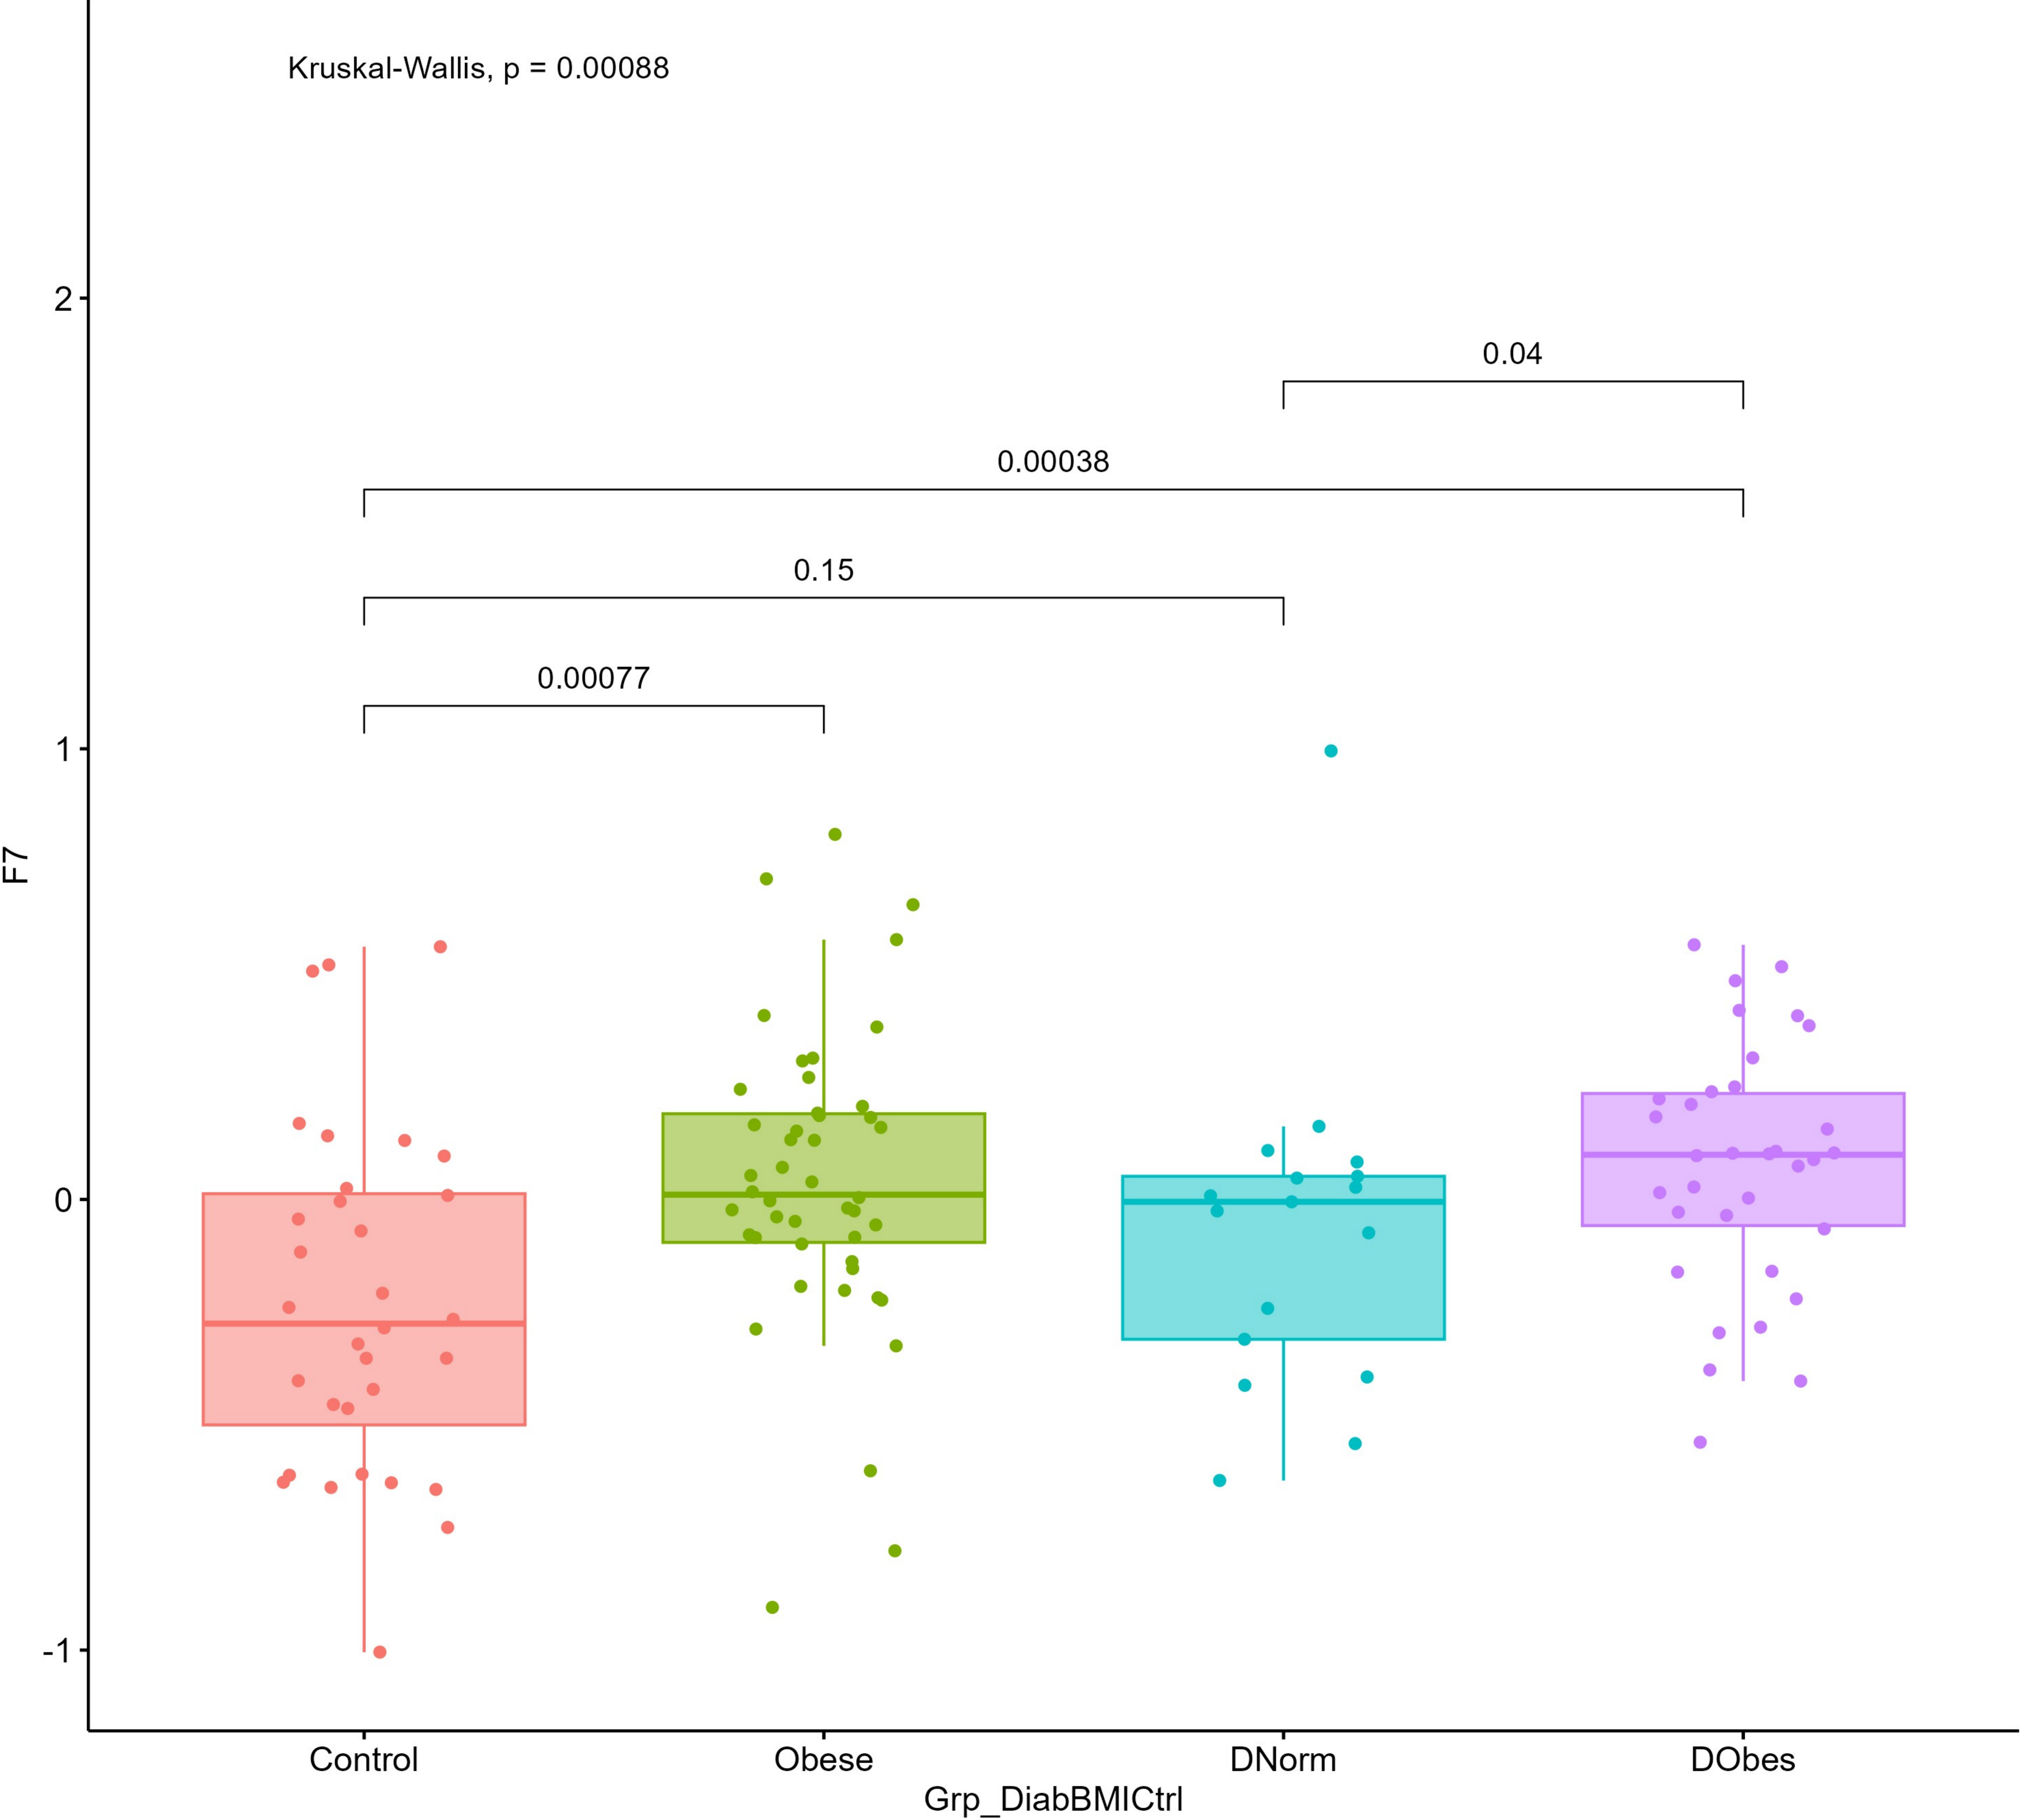

# Grp\_DiabBMICtrl

Grp\_DiabBMICtrl Control Obese DNorm DObes

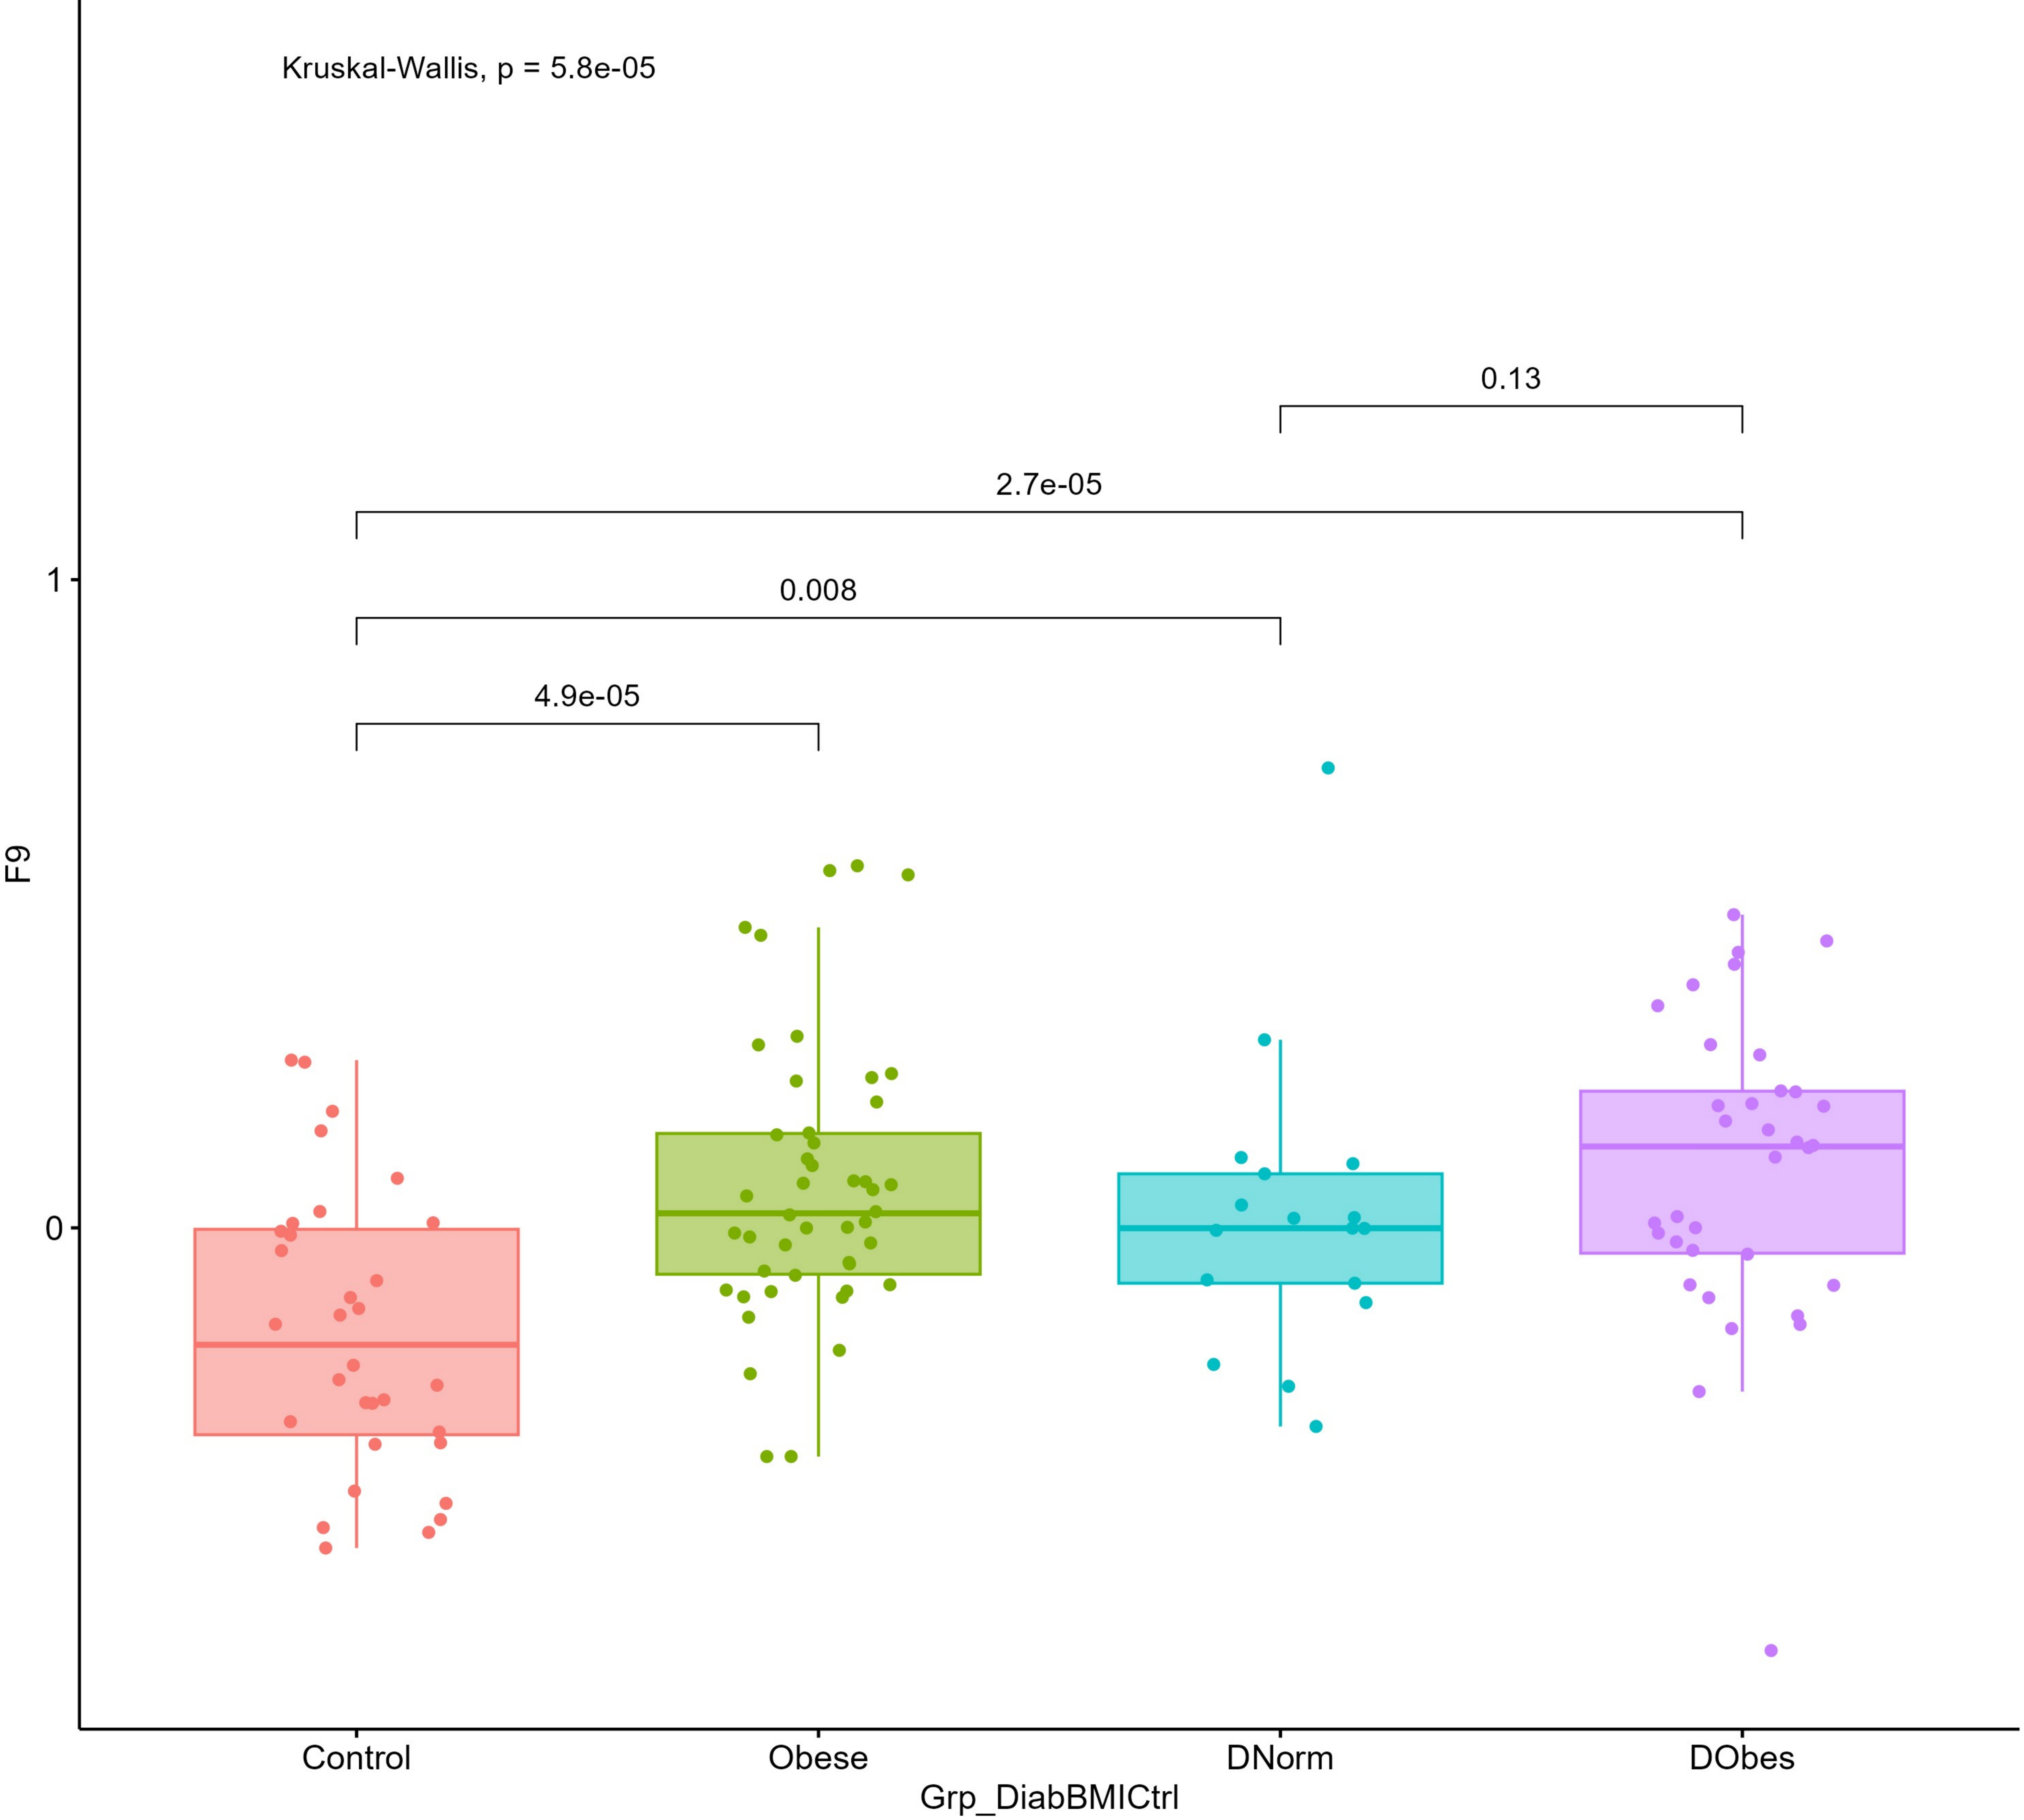

# Grp\_DiabBMICtrl

Grp\_DiabBMICtrl Control Obese DNorm DObes

Kruskal-Wallis,  $p = 1.3\text{e-}11$

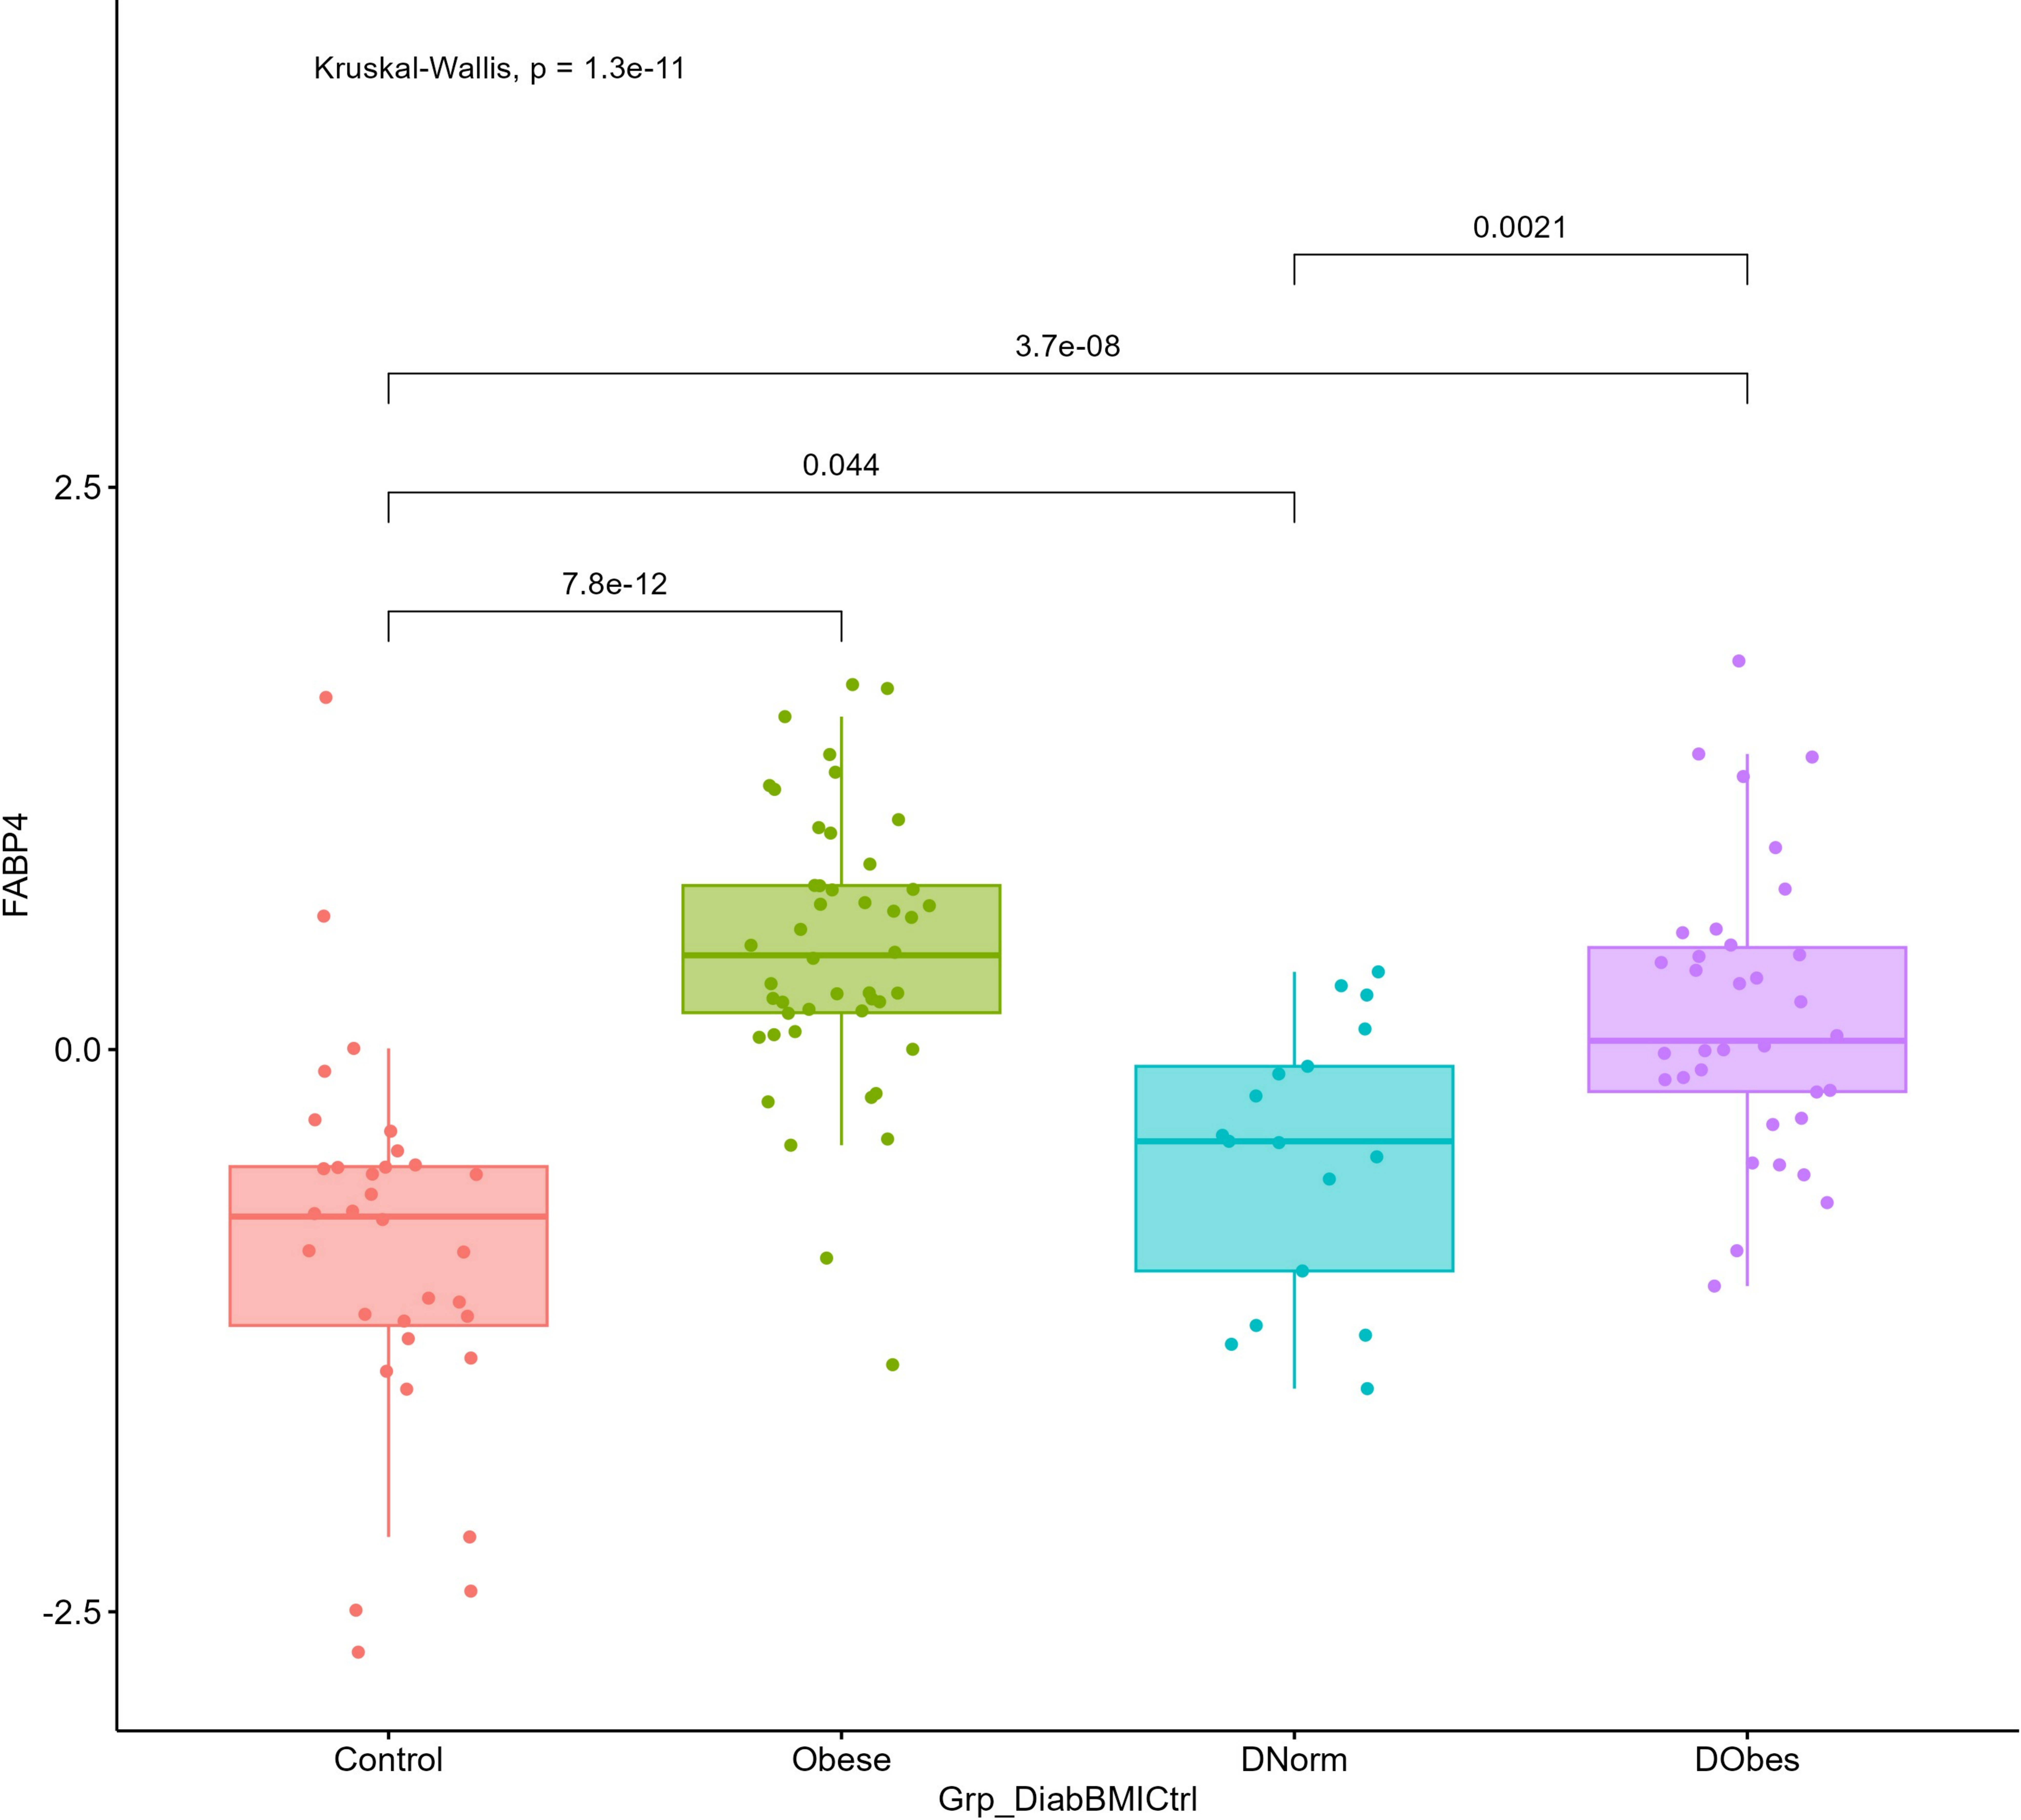

# Grp\_DiabBMICtrl

Grp\_DiabBMICtrl Control Obese DNorm DObes

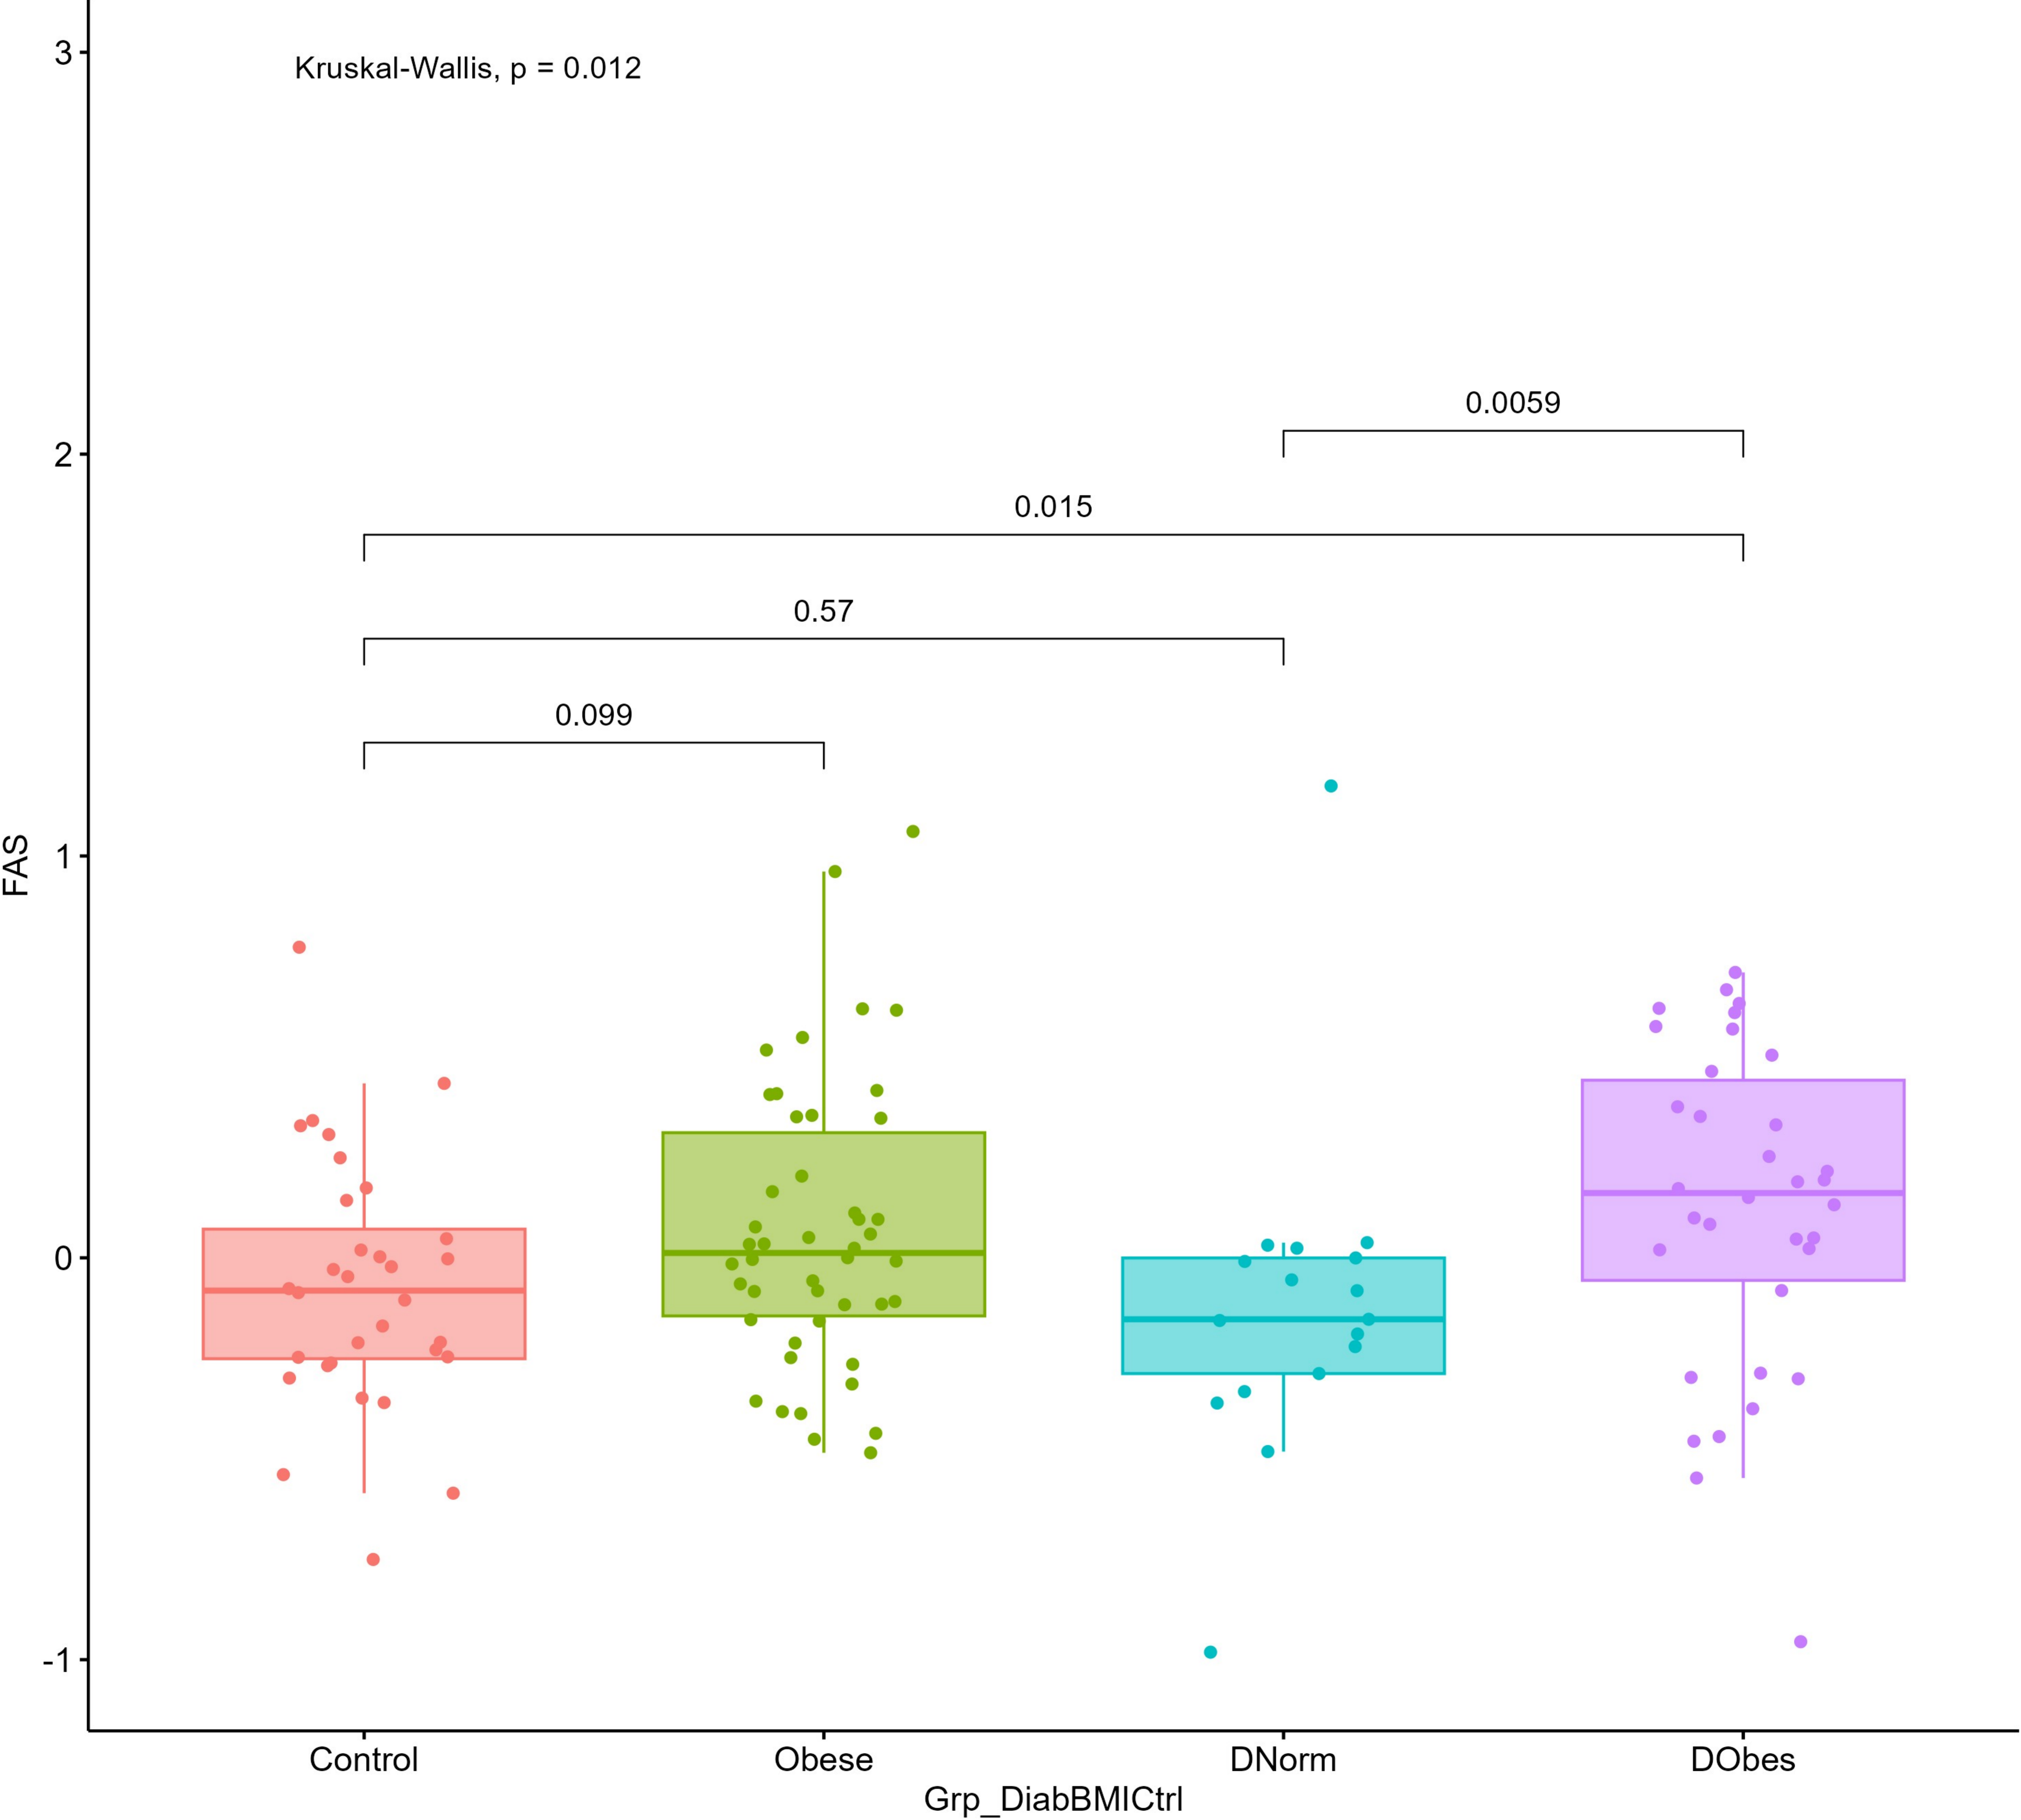

# Grp\_DiabBMICtrl

Grp\_DiabBMICtrl Control Obese DNorm DObes

Kruskal-Wallis,  $p = 7.2 \times 10^{-8}$

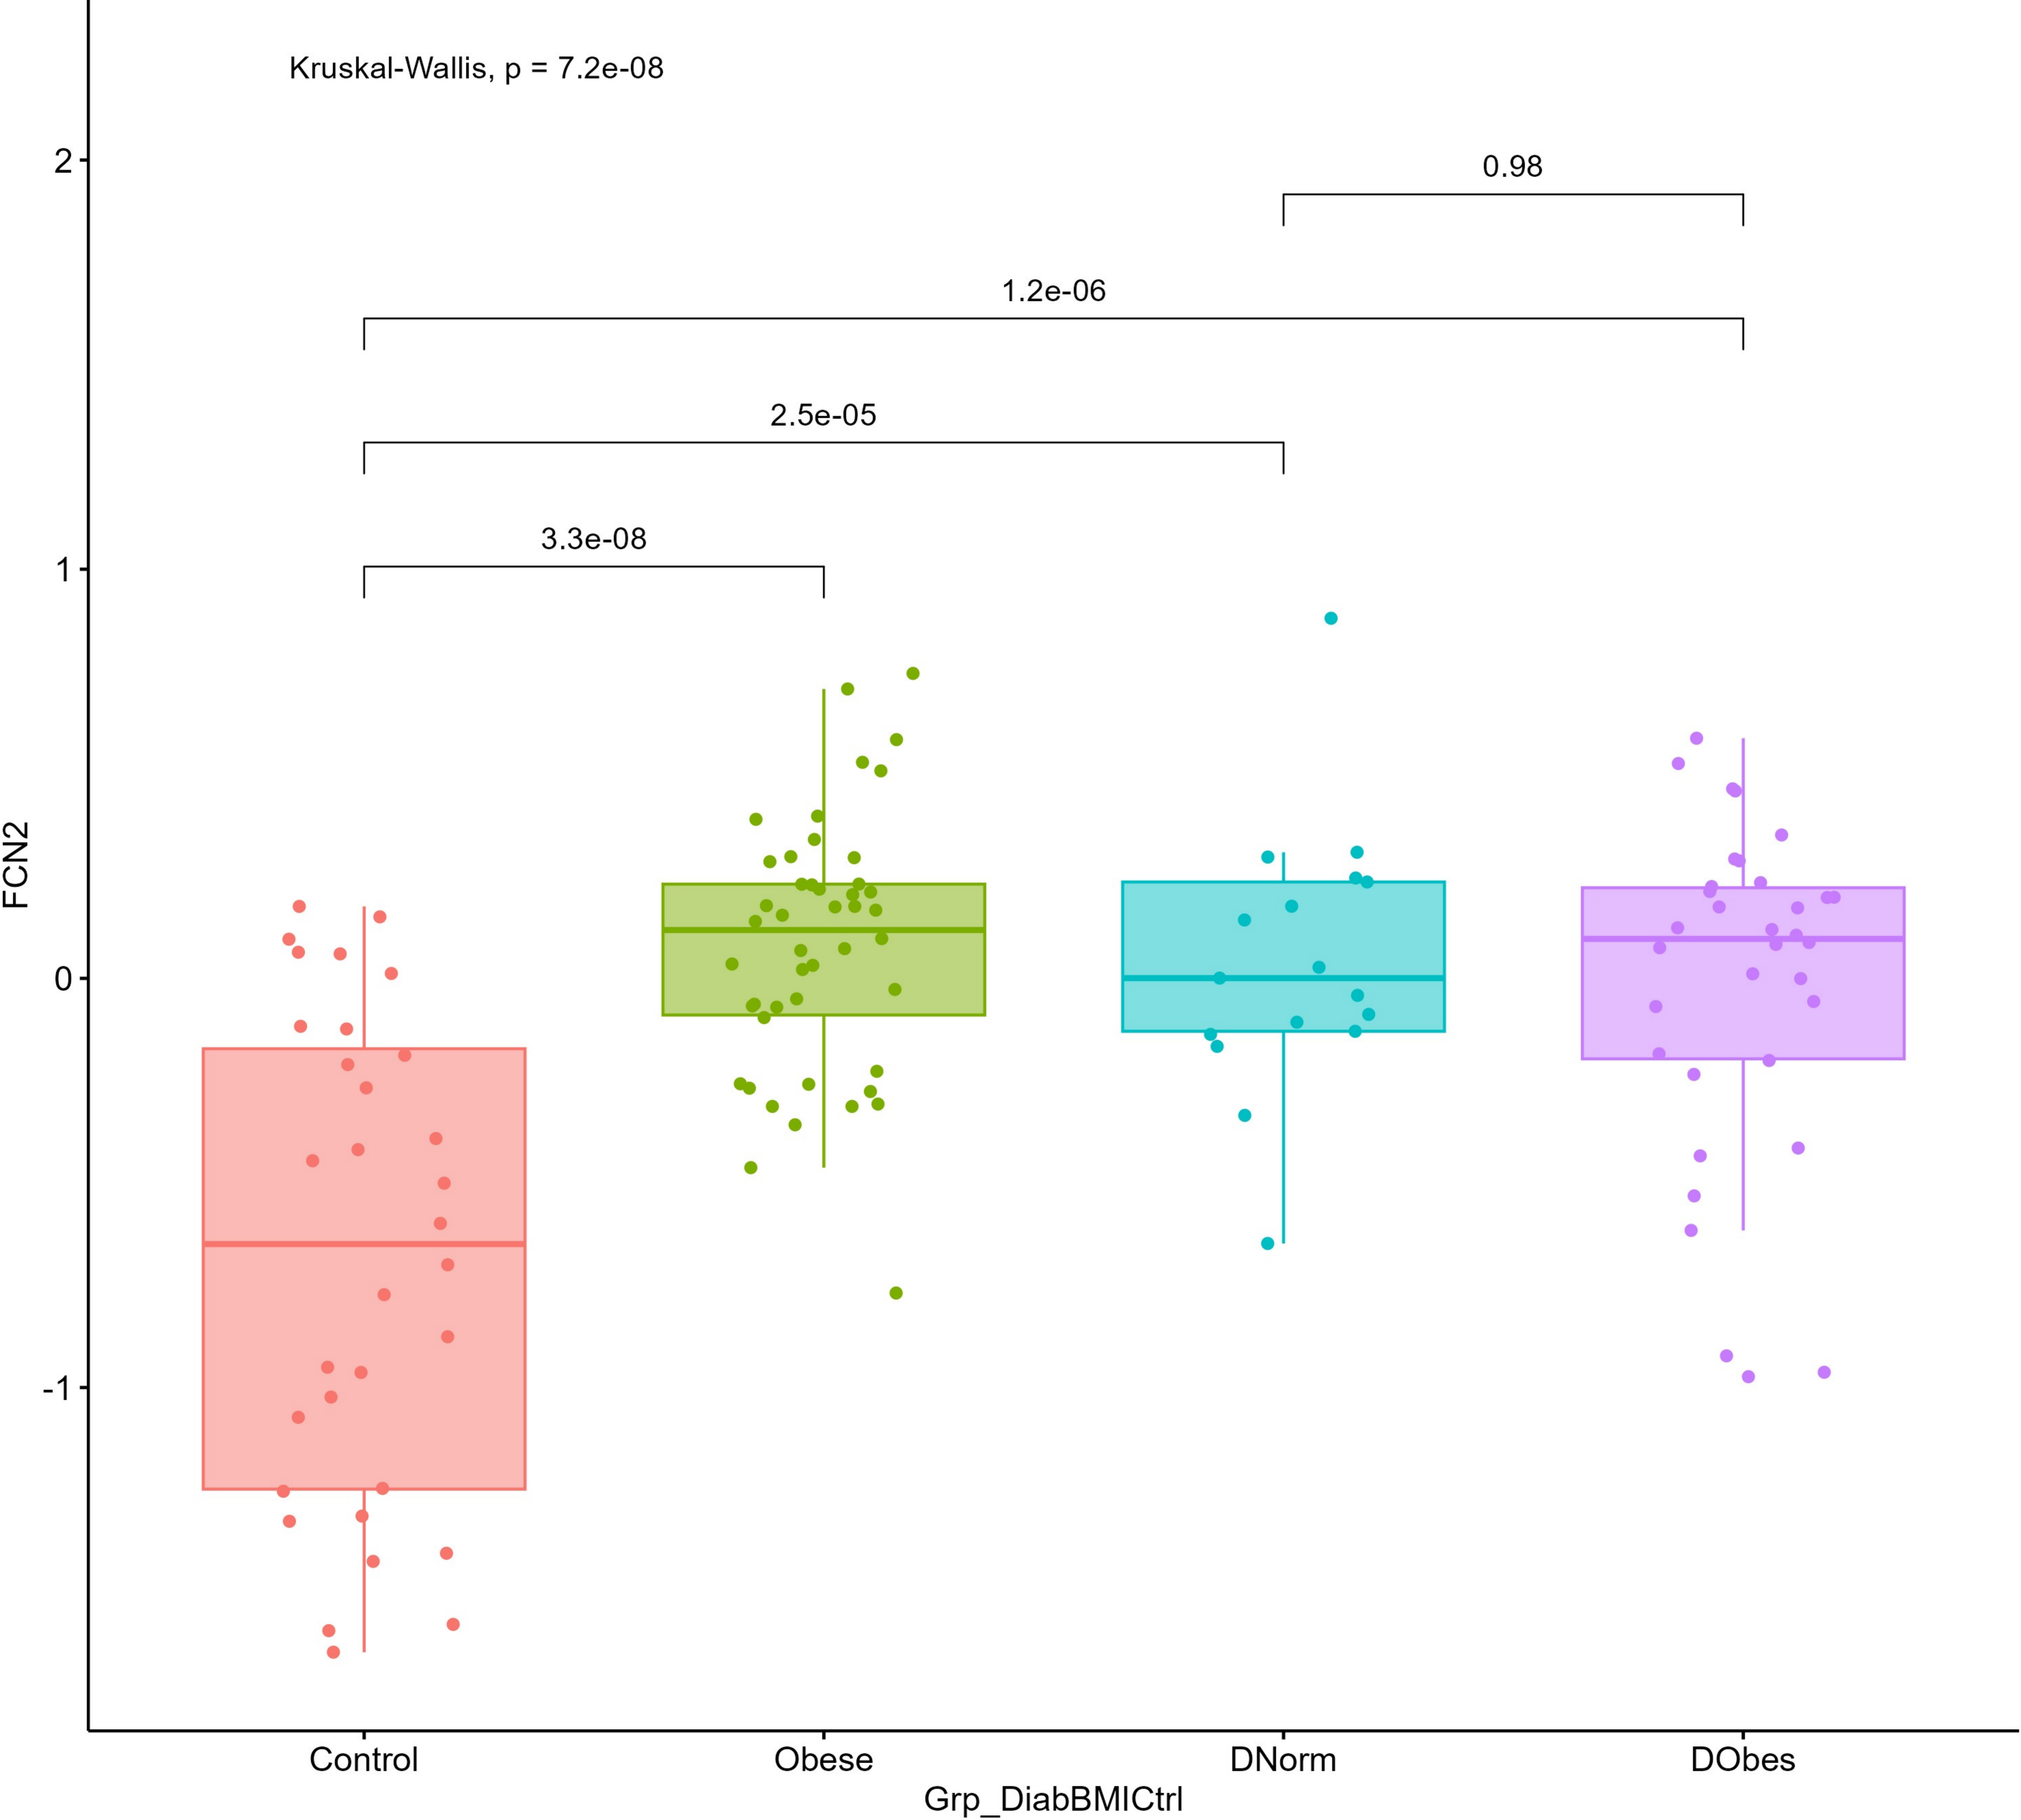

# Grp\_DiabBMICtrl

Grp\_DiabBMICtrl Control Obese DNorm DObes

Kruskal-Wallis, p = 0.0041

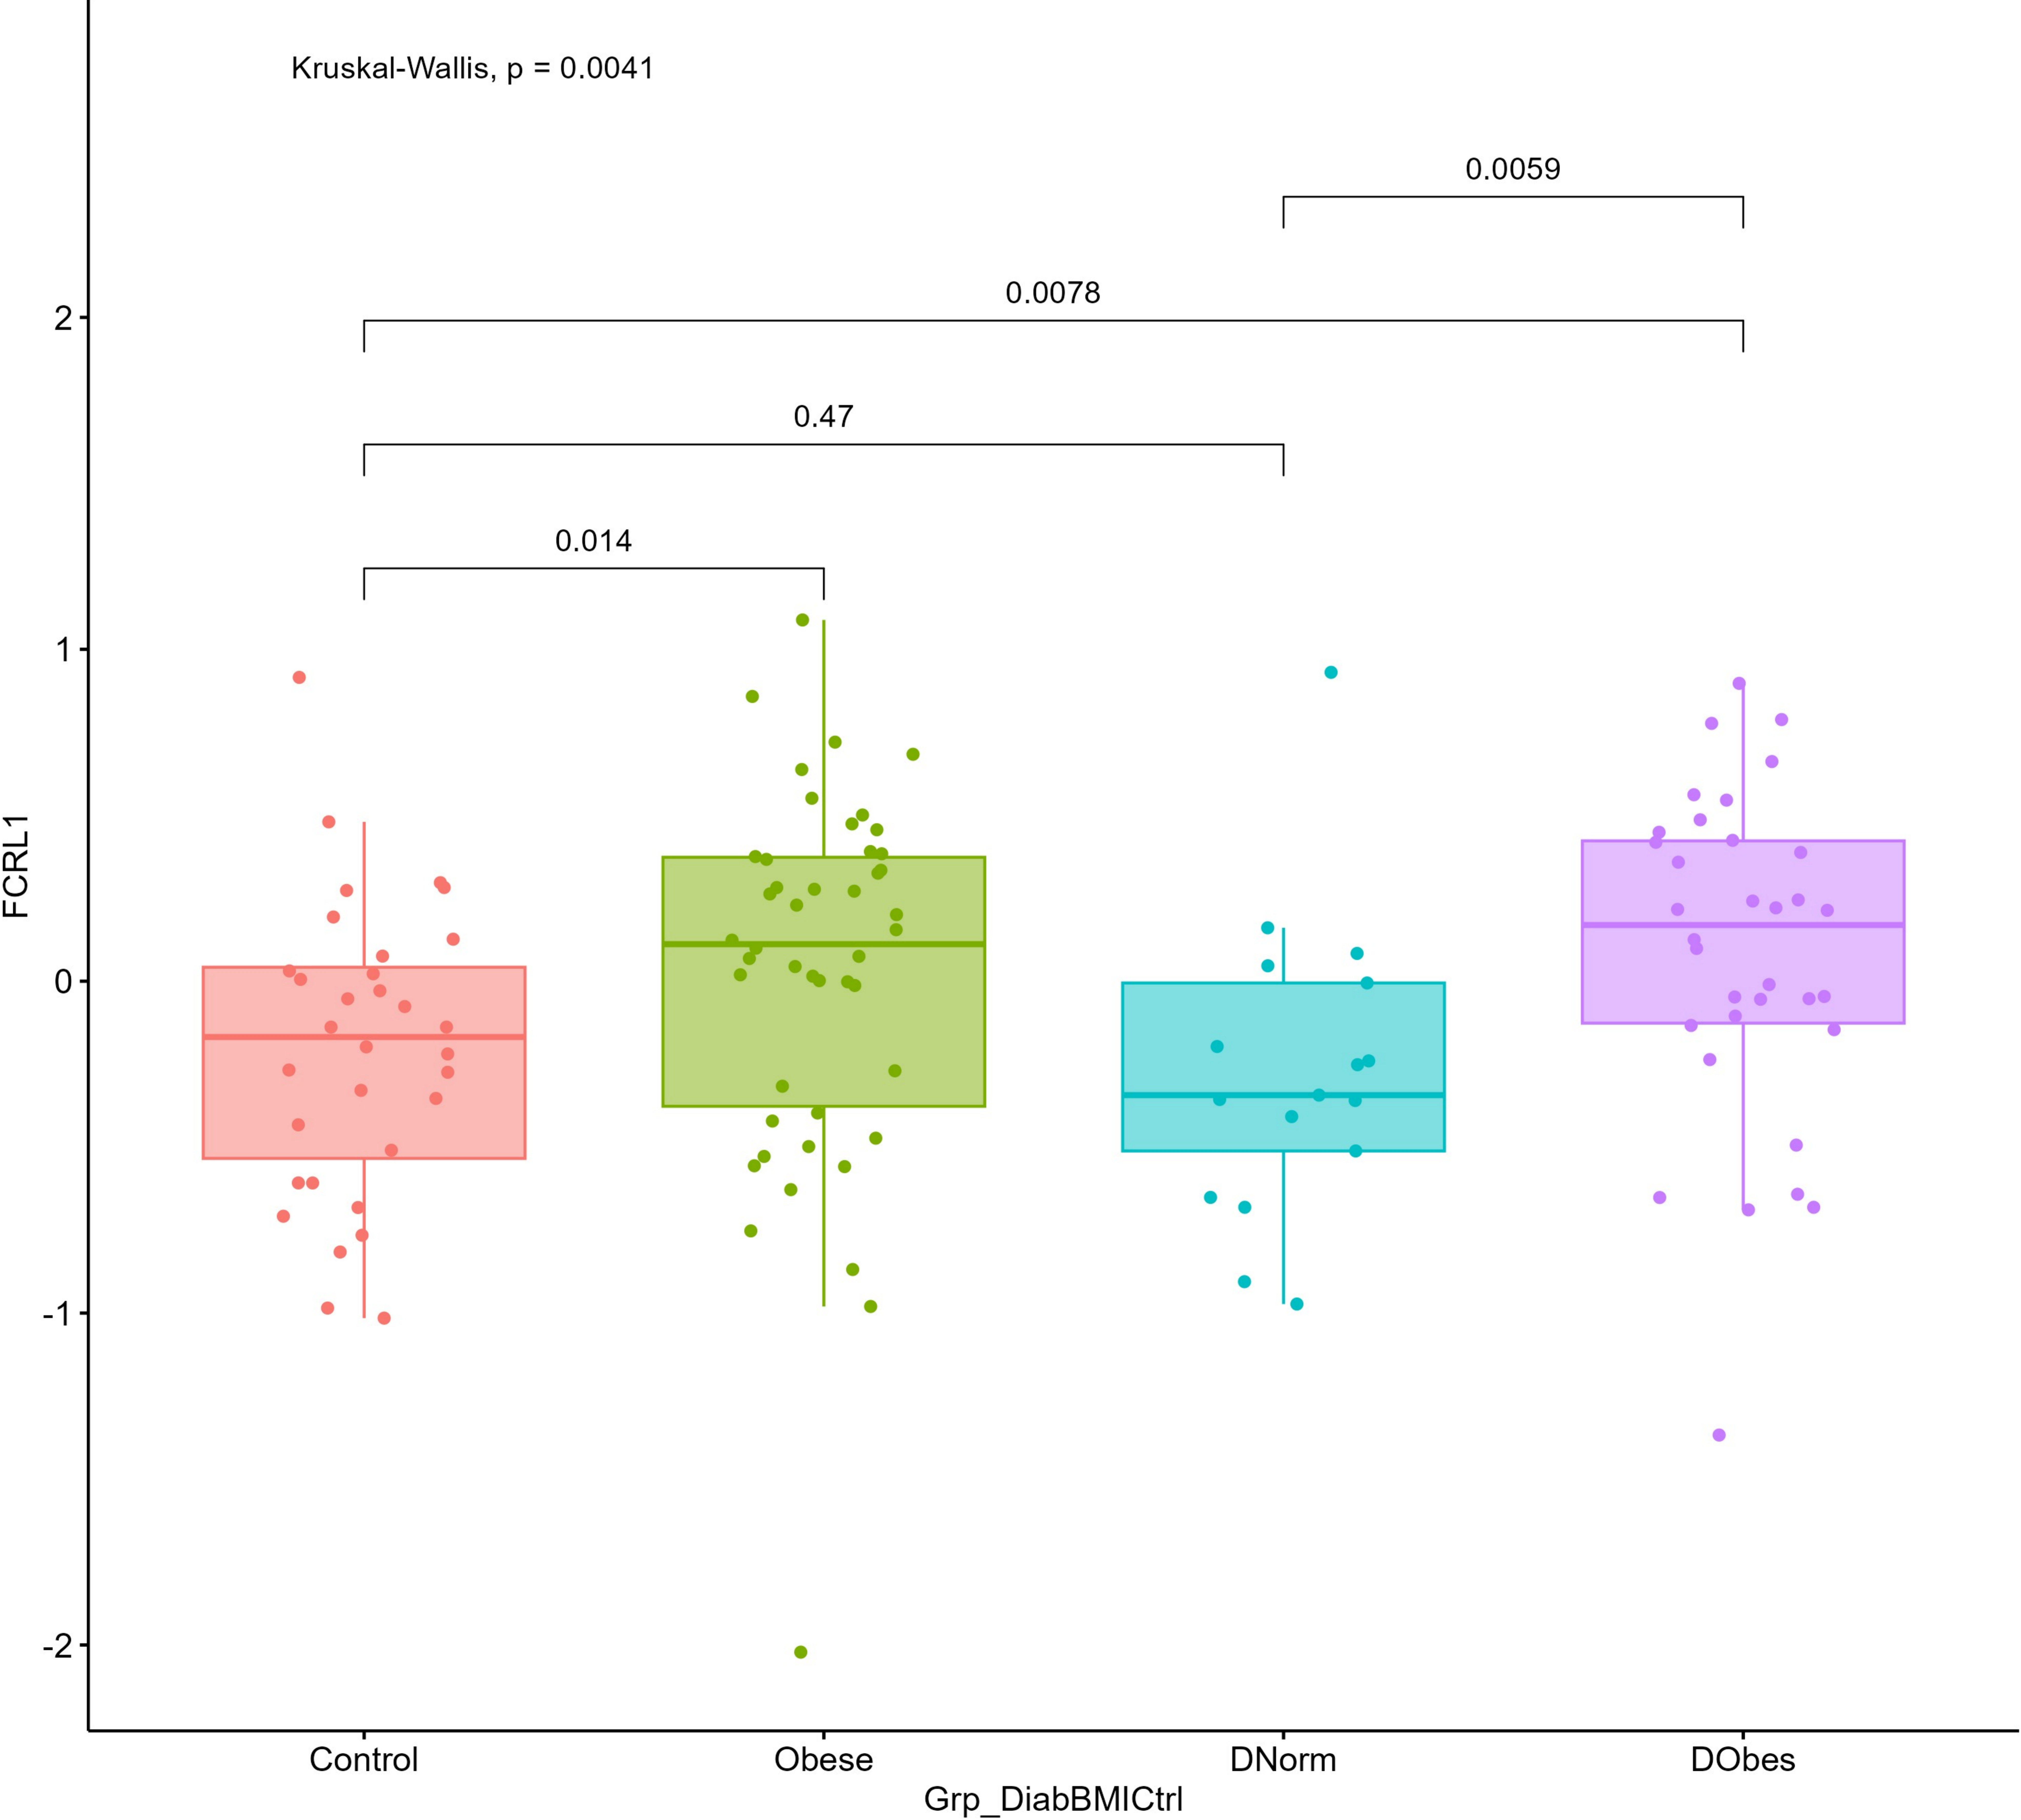

# Grp\_DiabBMICtrl

Grp\_DiabBMICtrl Control Obese DNorm DObes

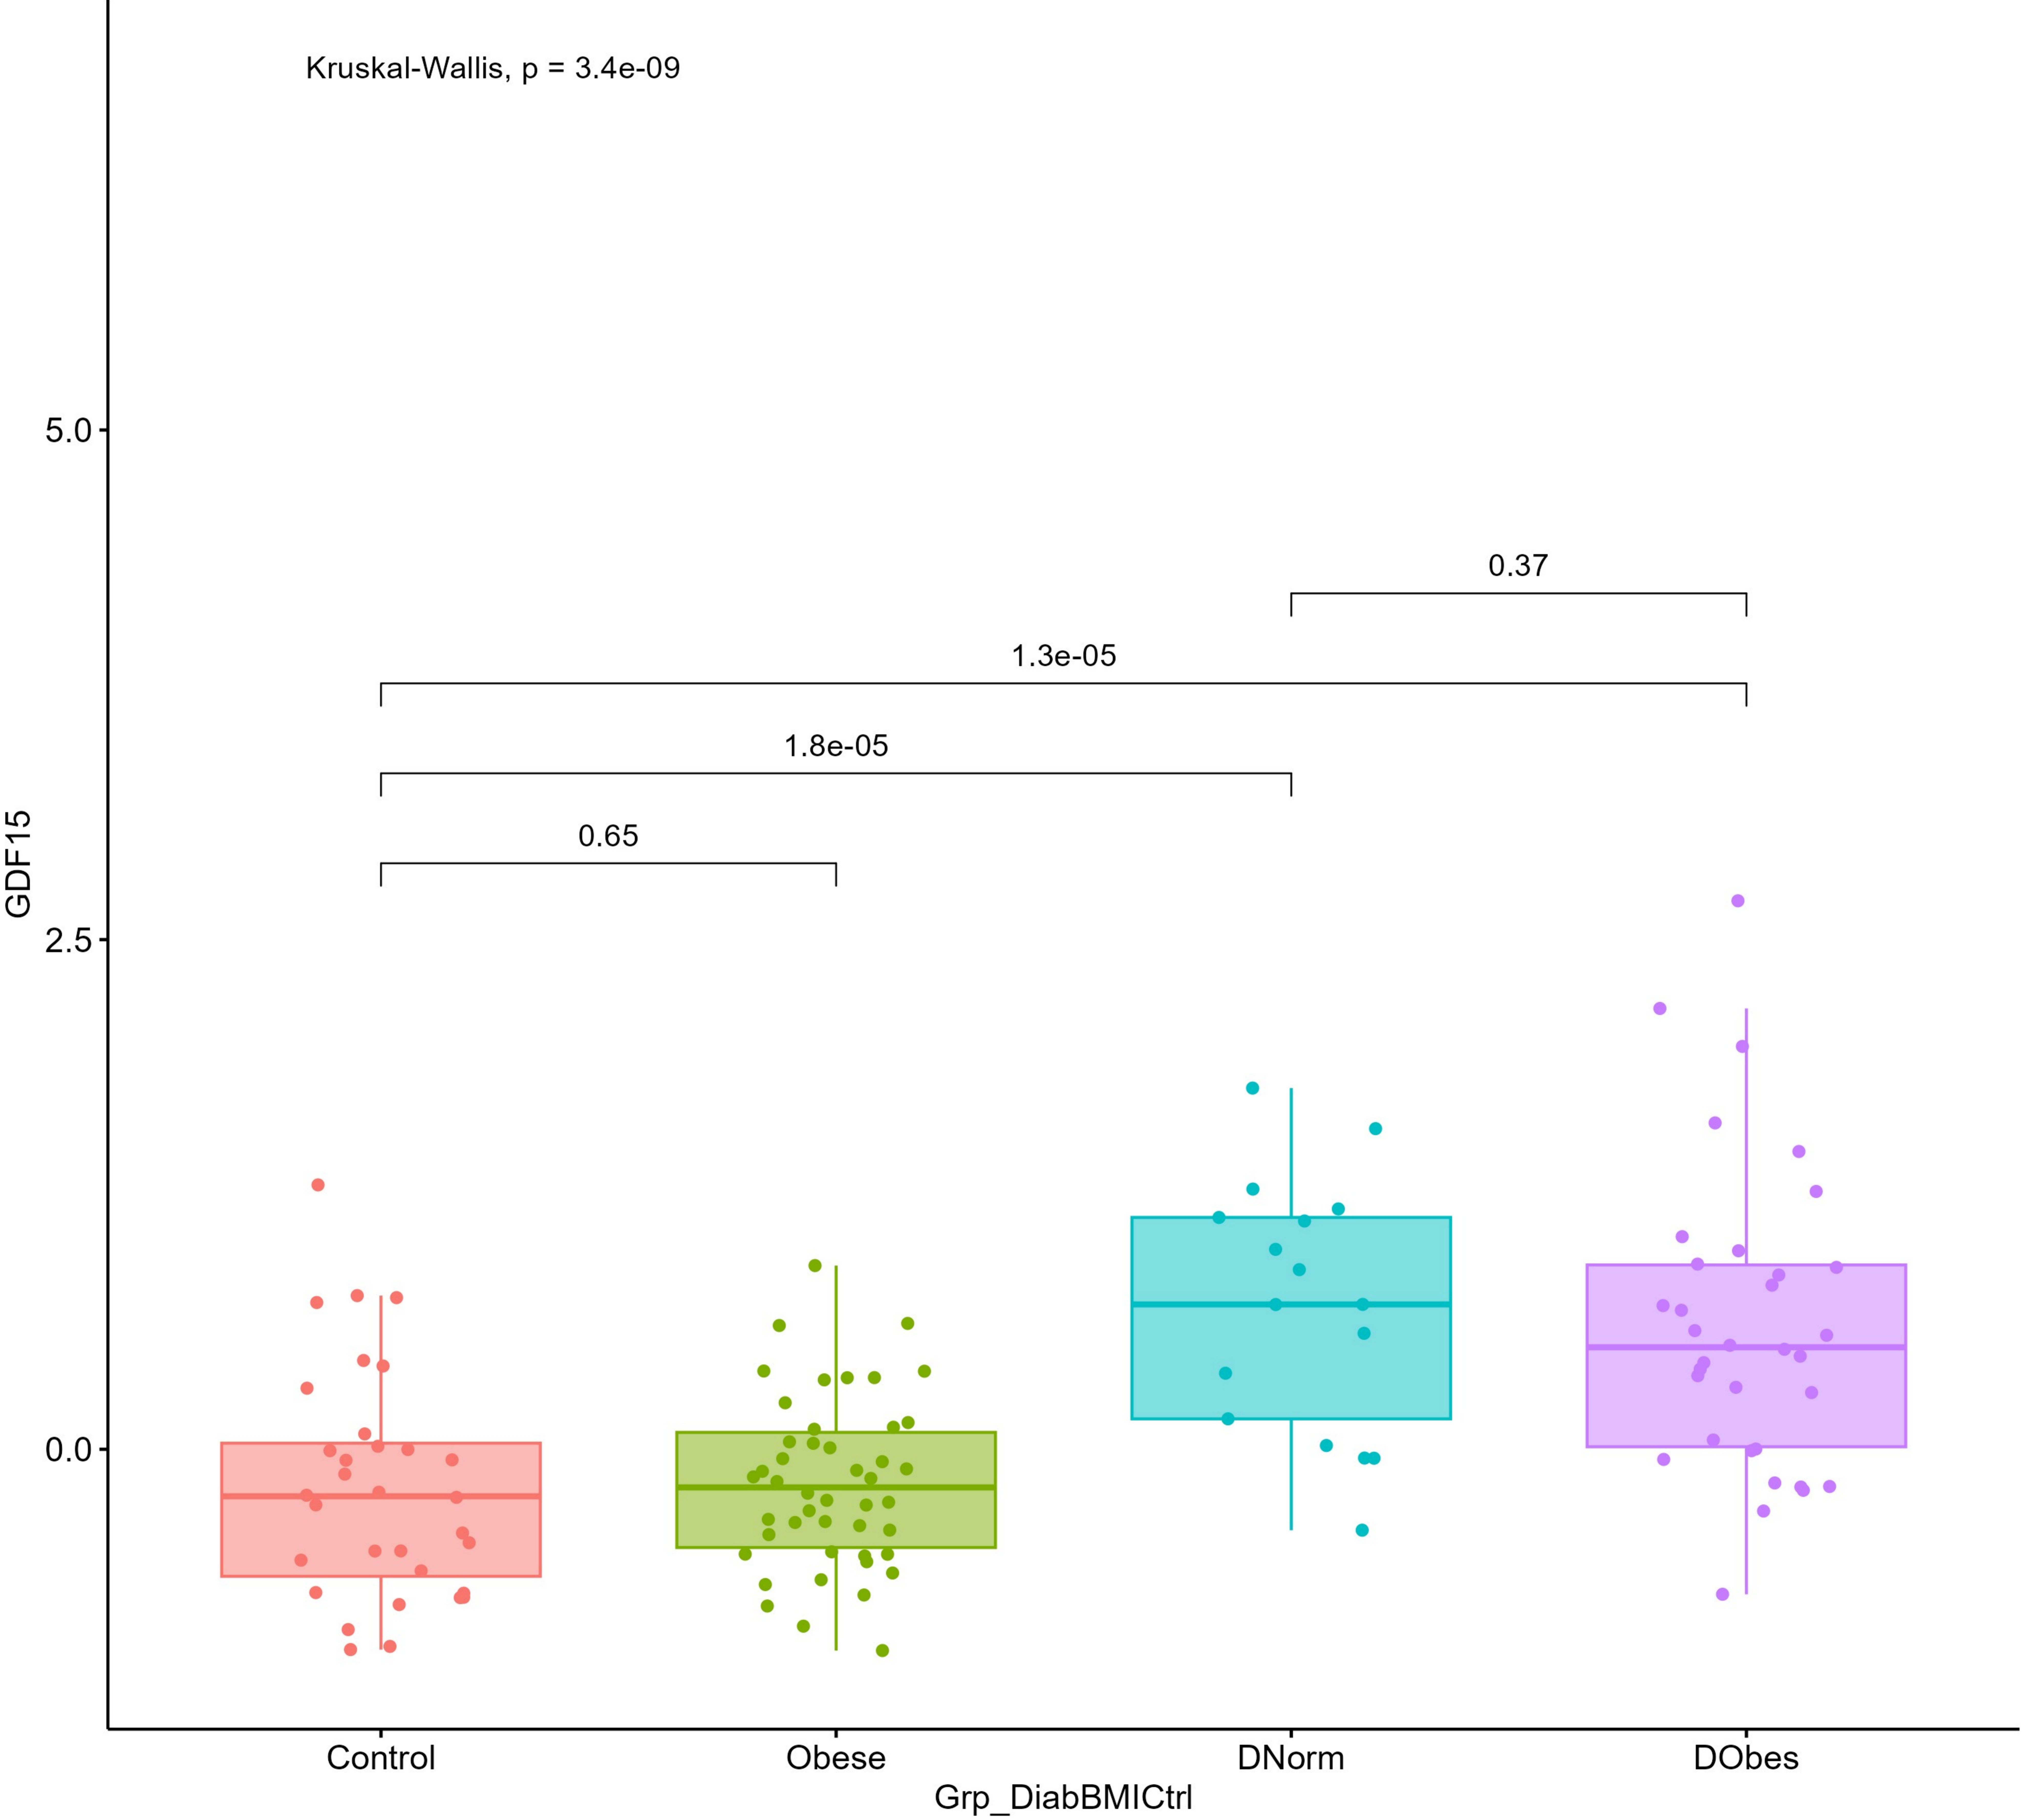

# Grp\_DiabBMICtrl

Grp\_DiabBMICtrl Control Obese DNorm DObes

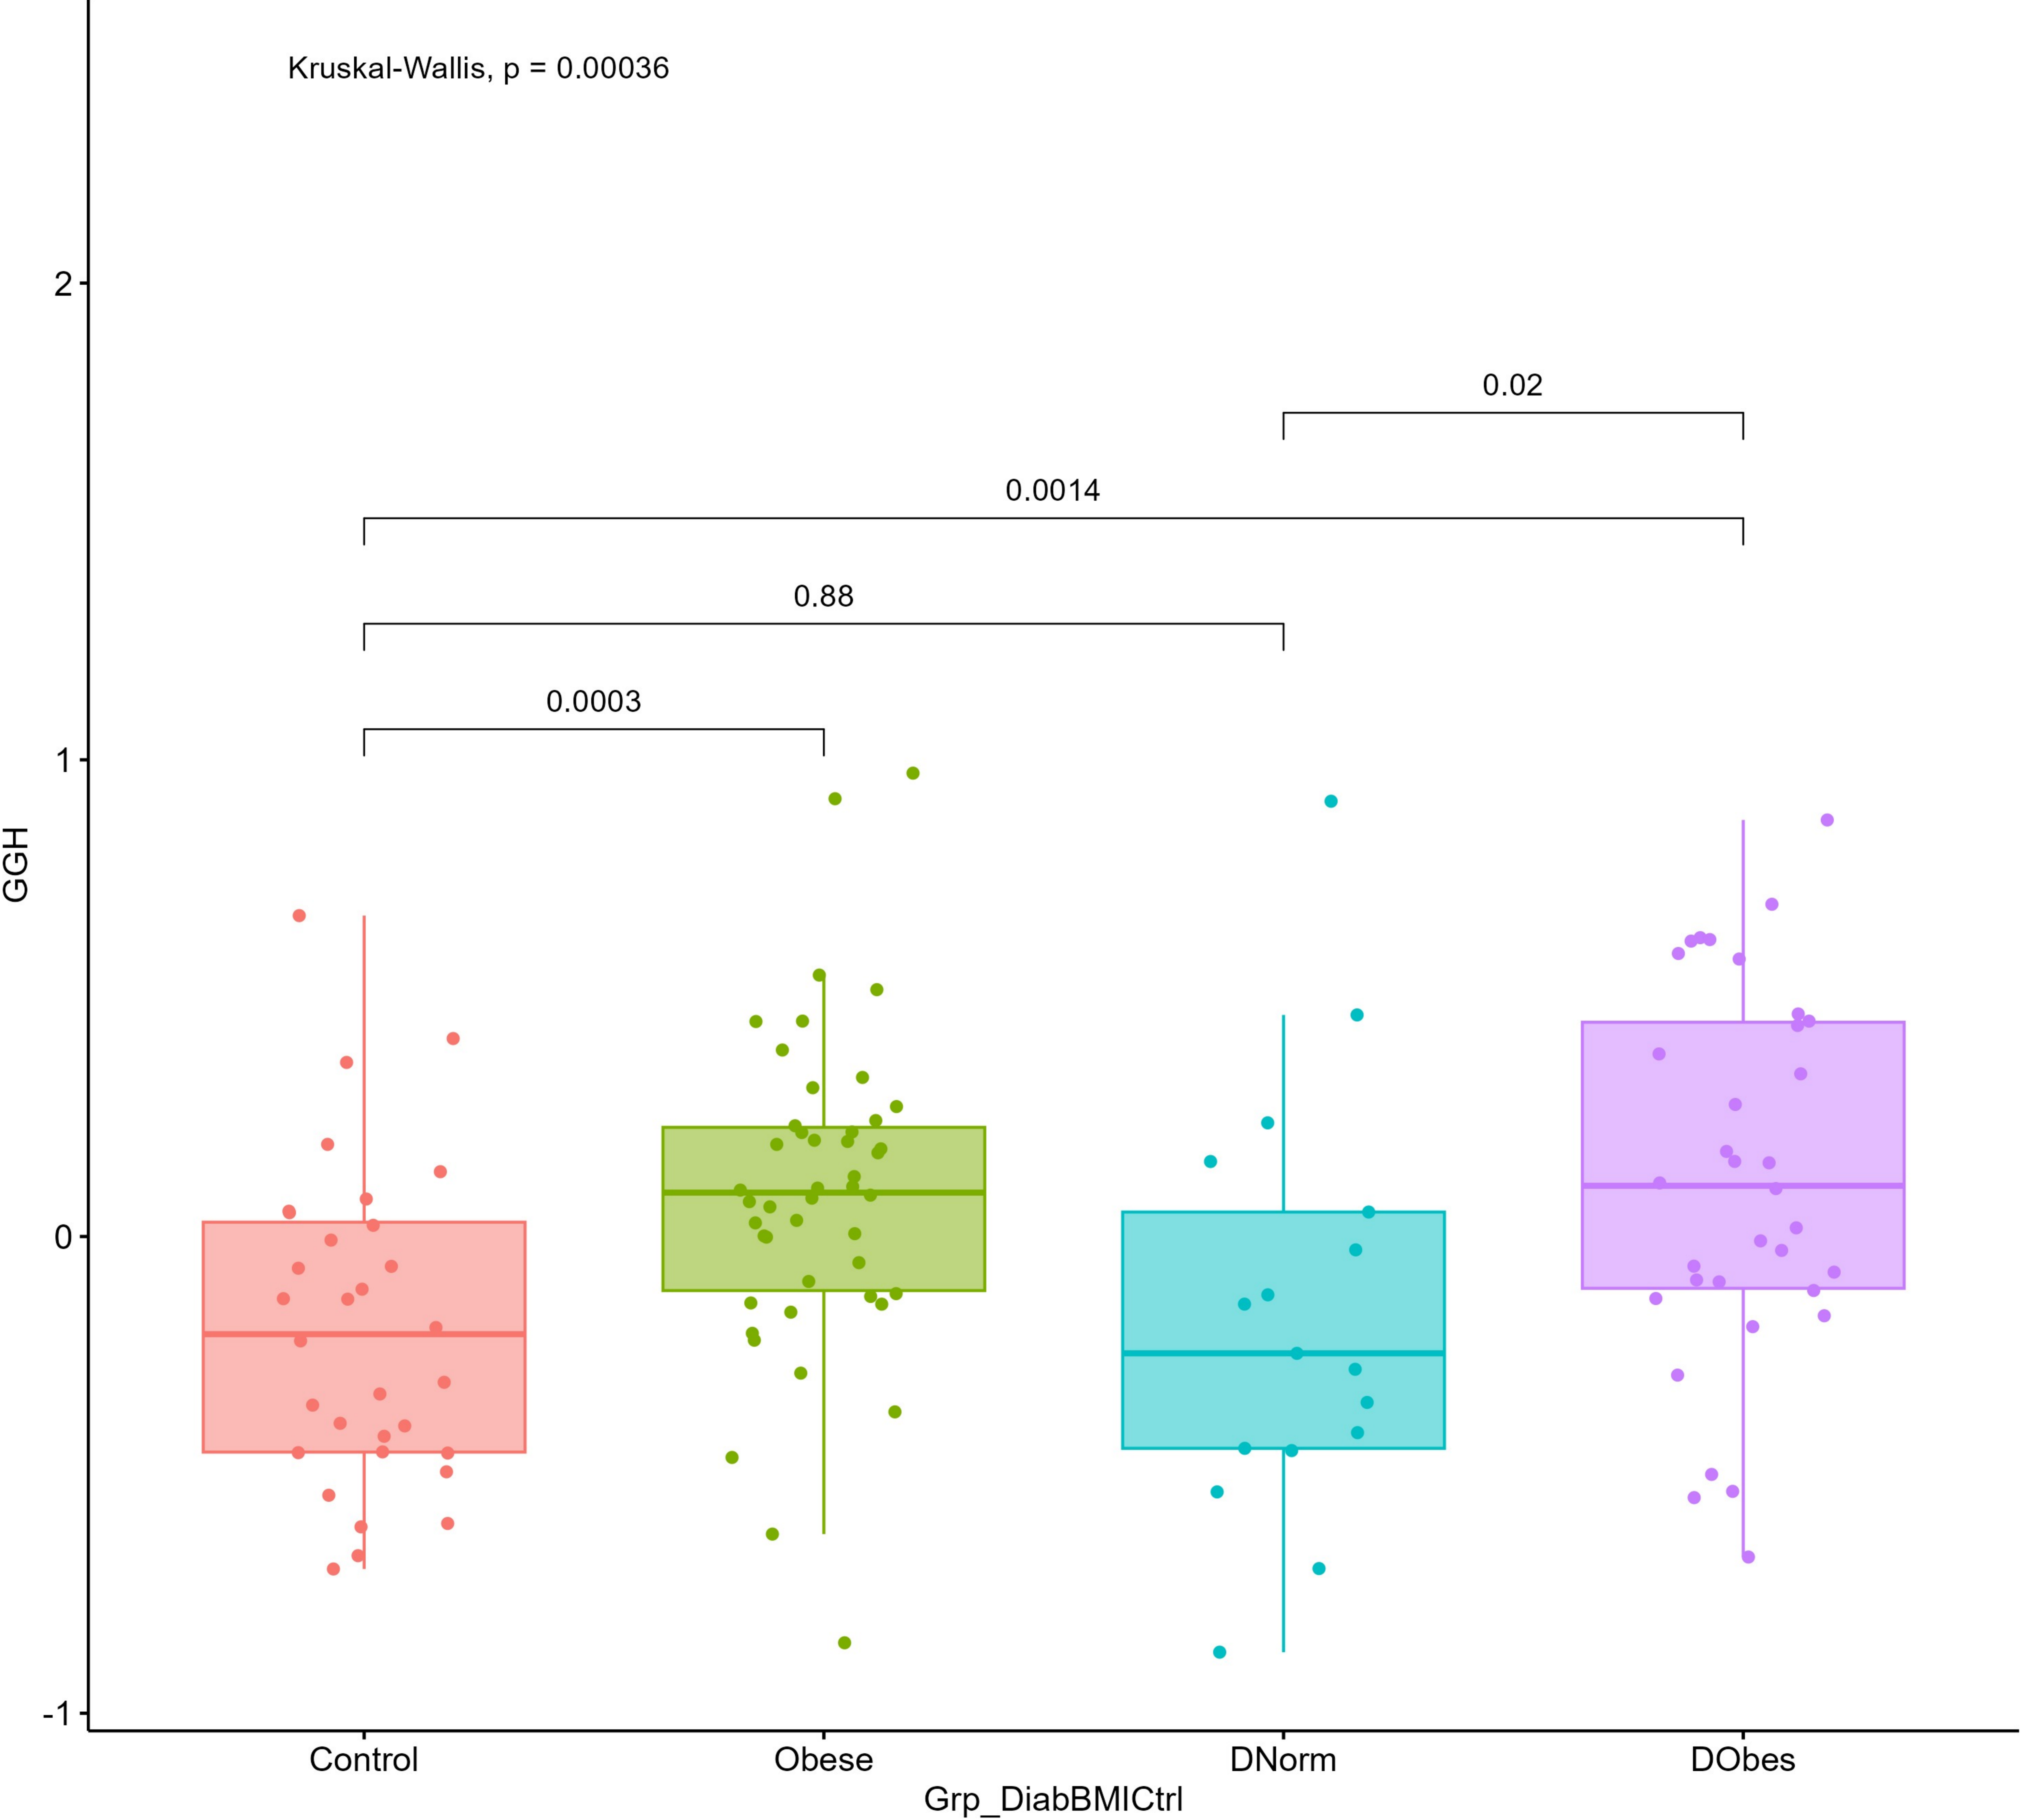

# Grp\_DiabBMICtrl

Grp\_DiabBMICtrl Control Obese DNorm DObes

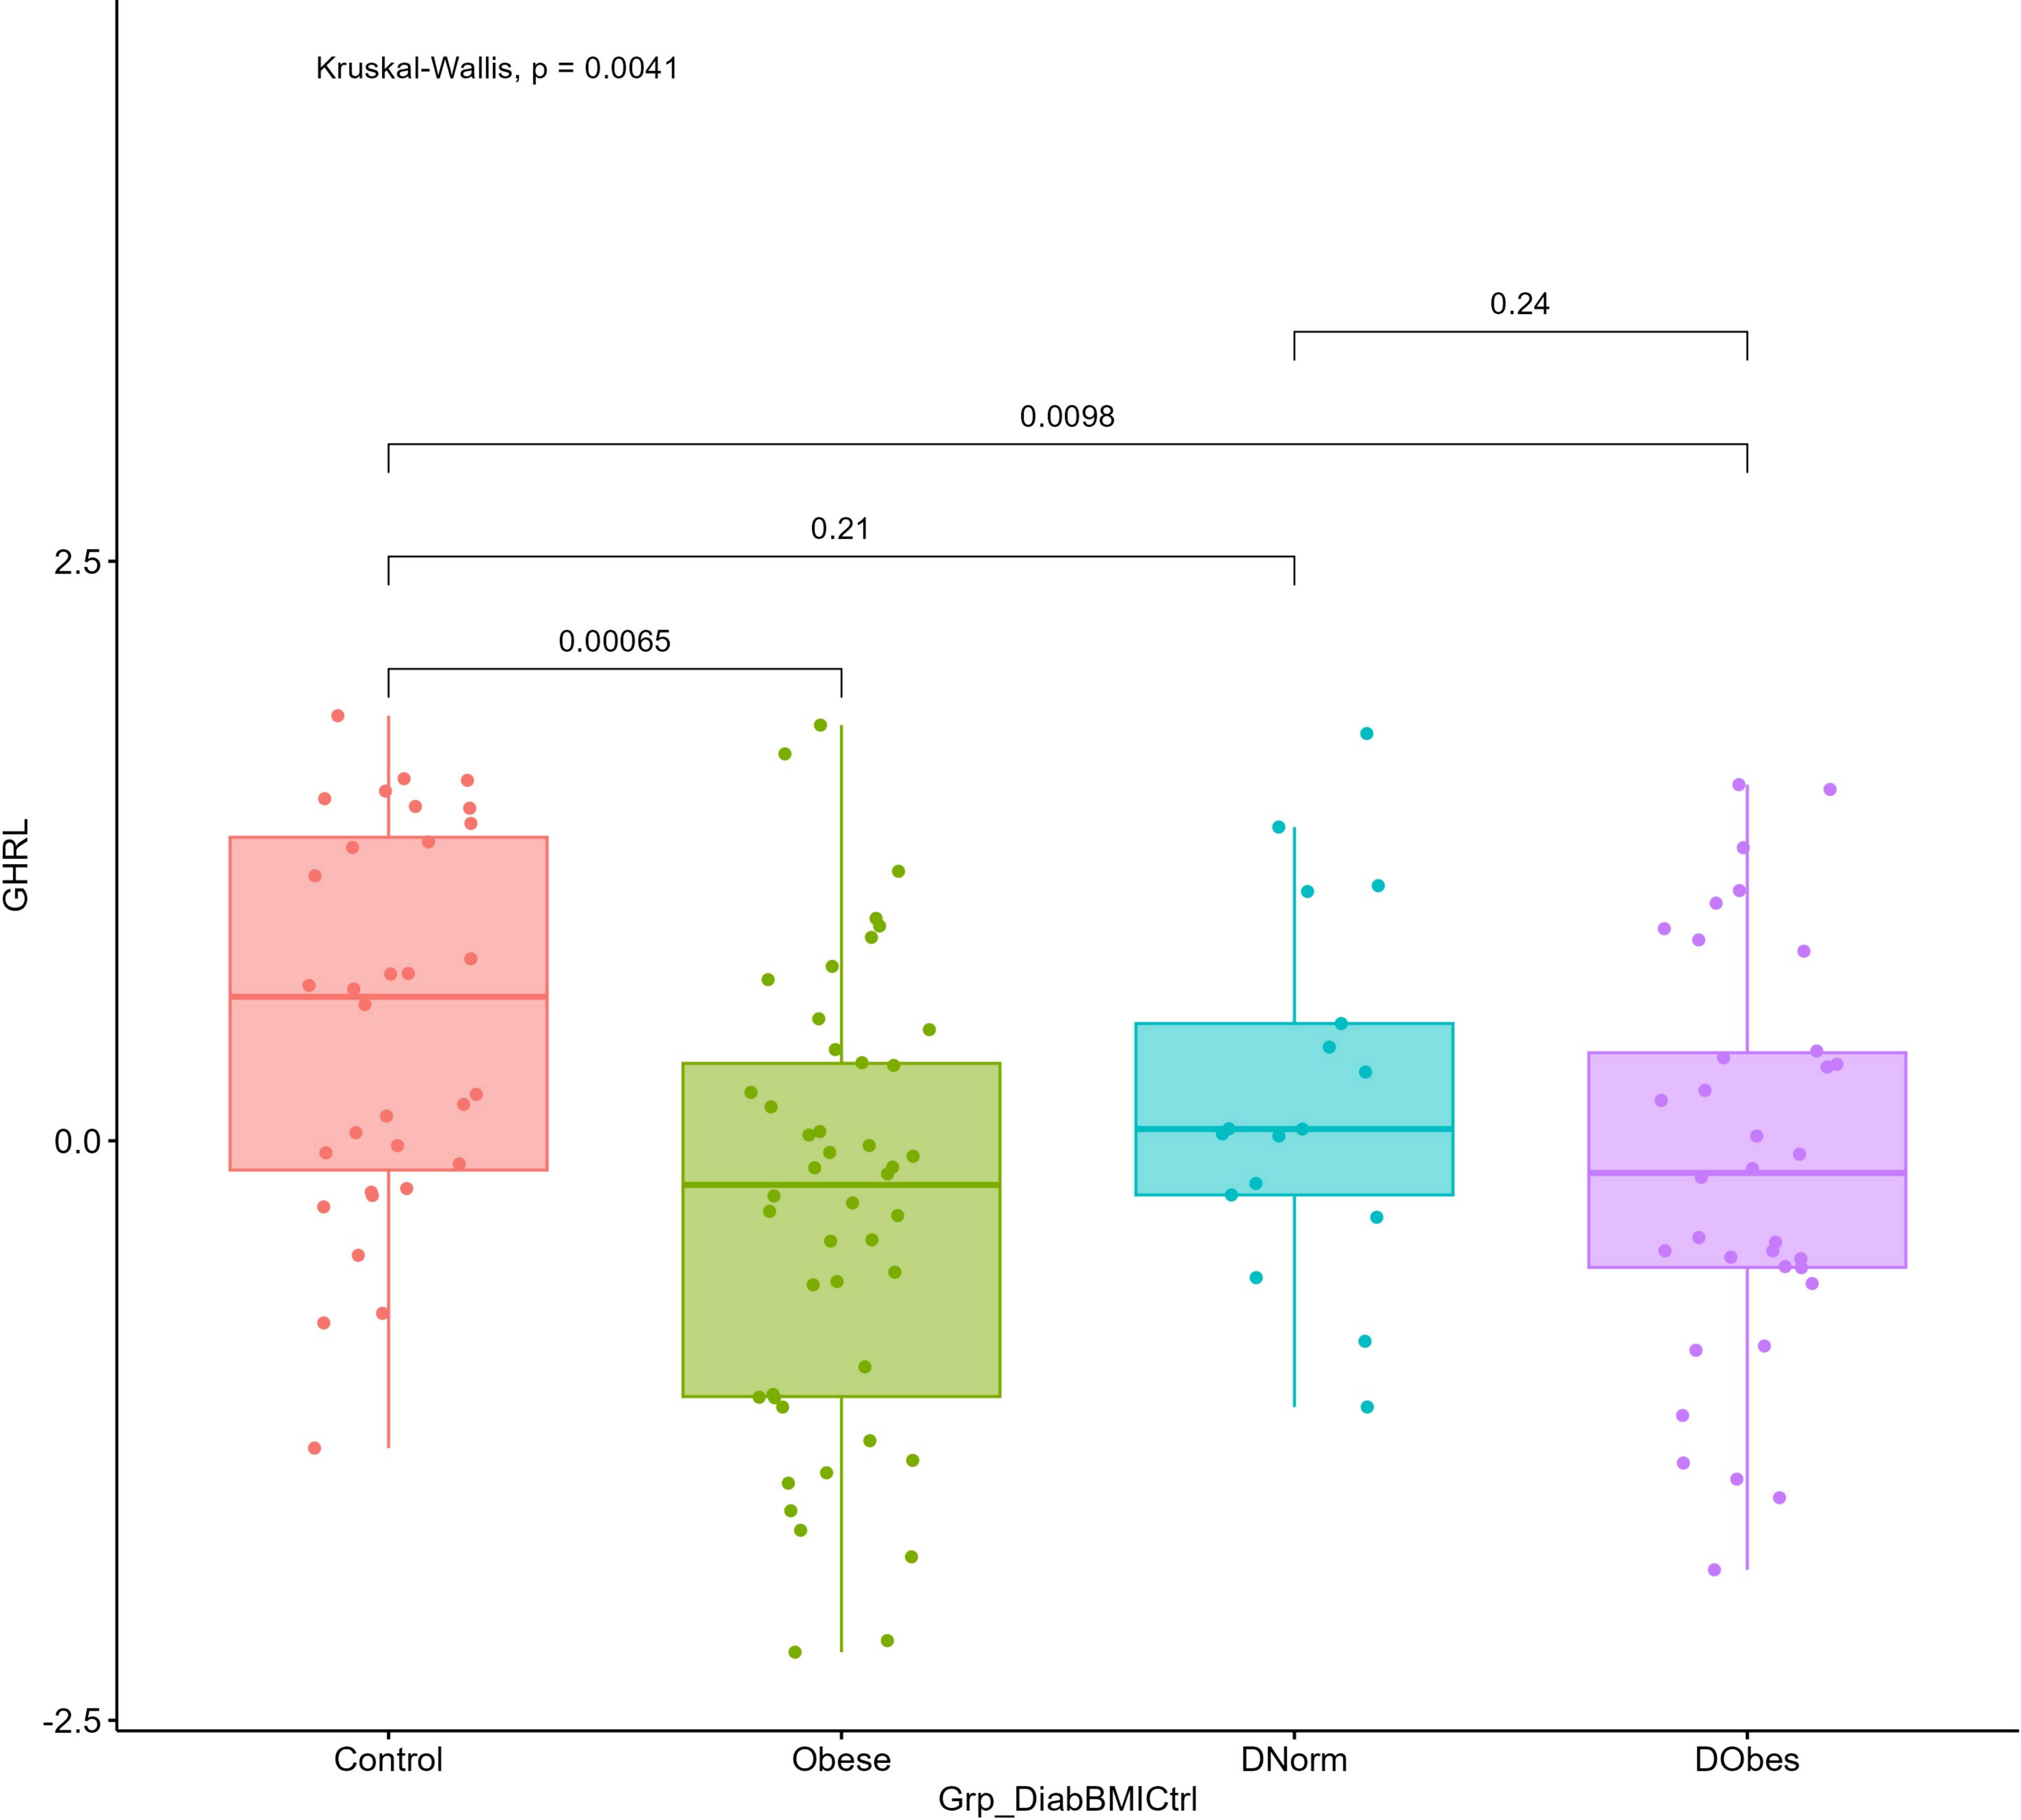

# Grp\_DiabBMICtrl

Grp\_DiabBMICtrl Control Obese DNorm DObes

Kruskal-Wallis,  $p = 2.5e-06$

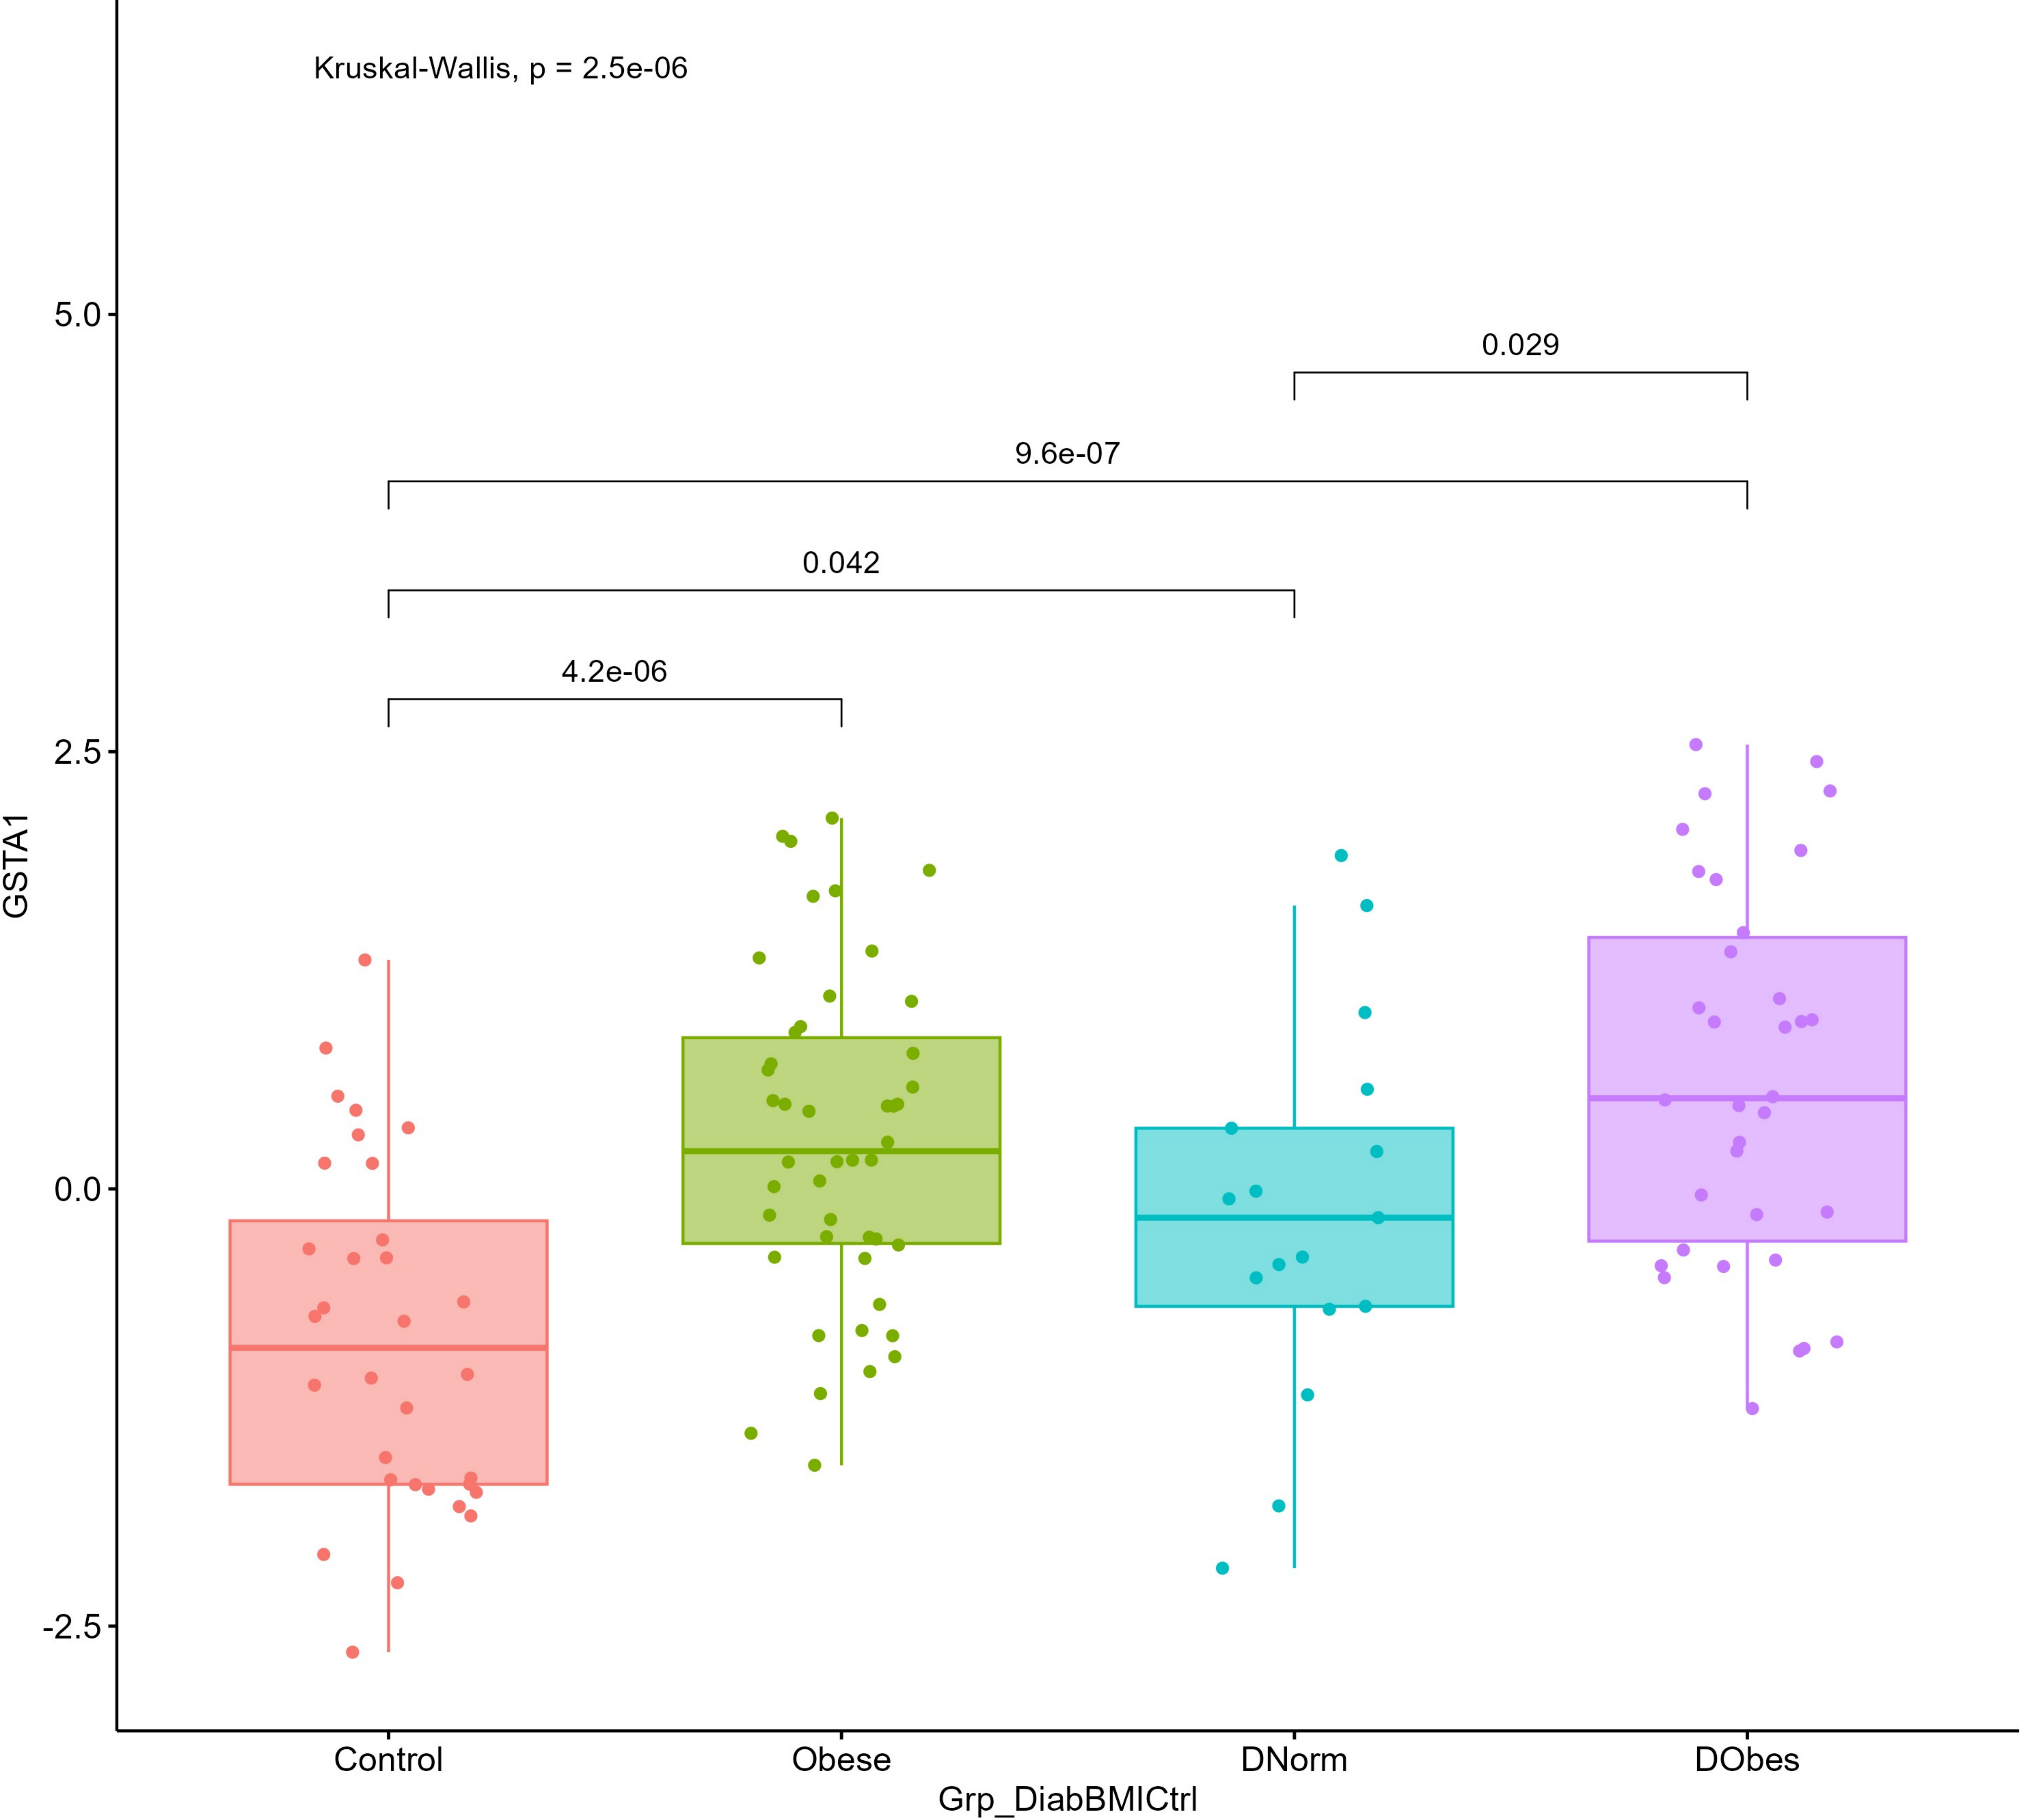

# Grp\_DiabBMICtrl

Grp\_DiabBMICtrl Control Obese DNorm DObes

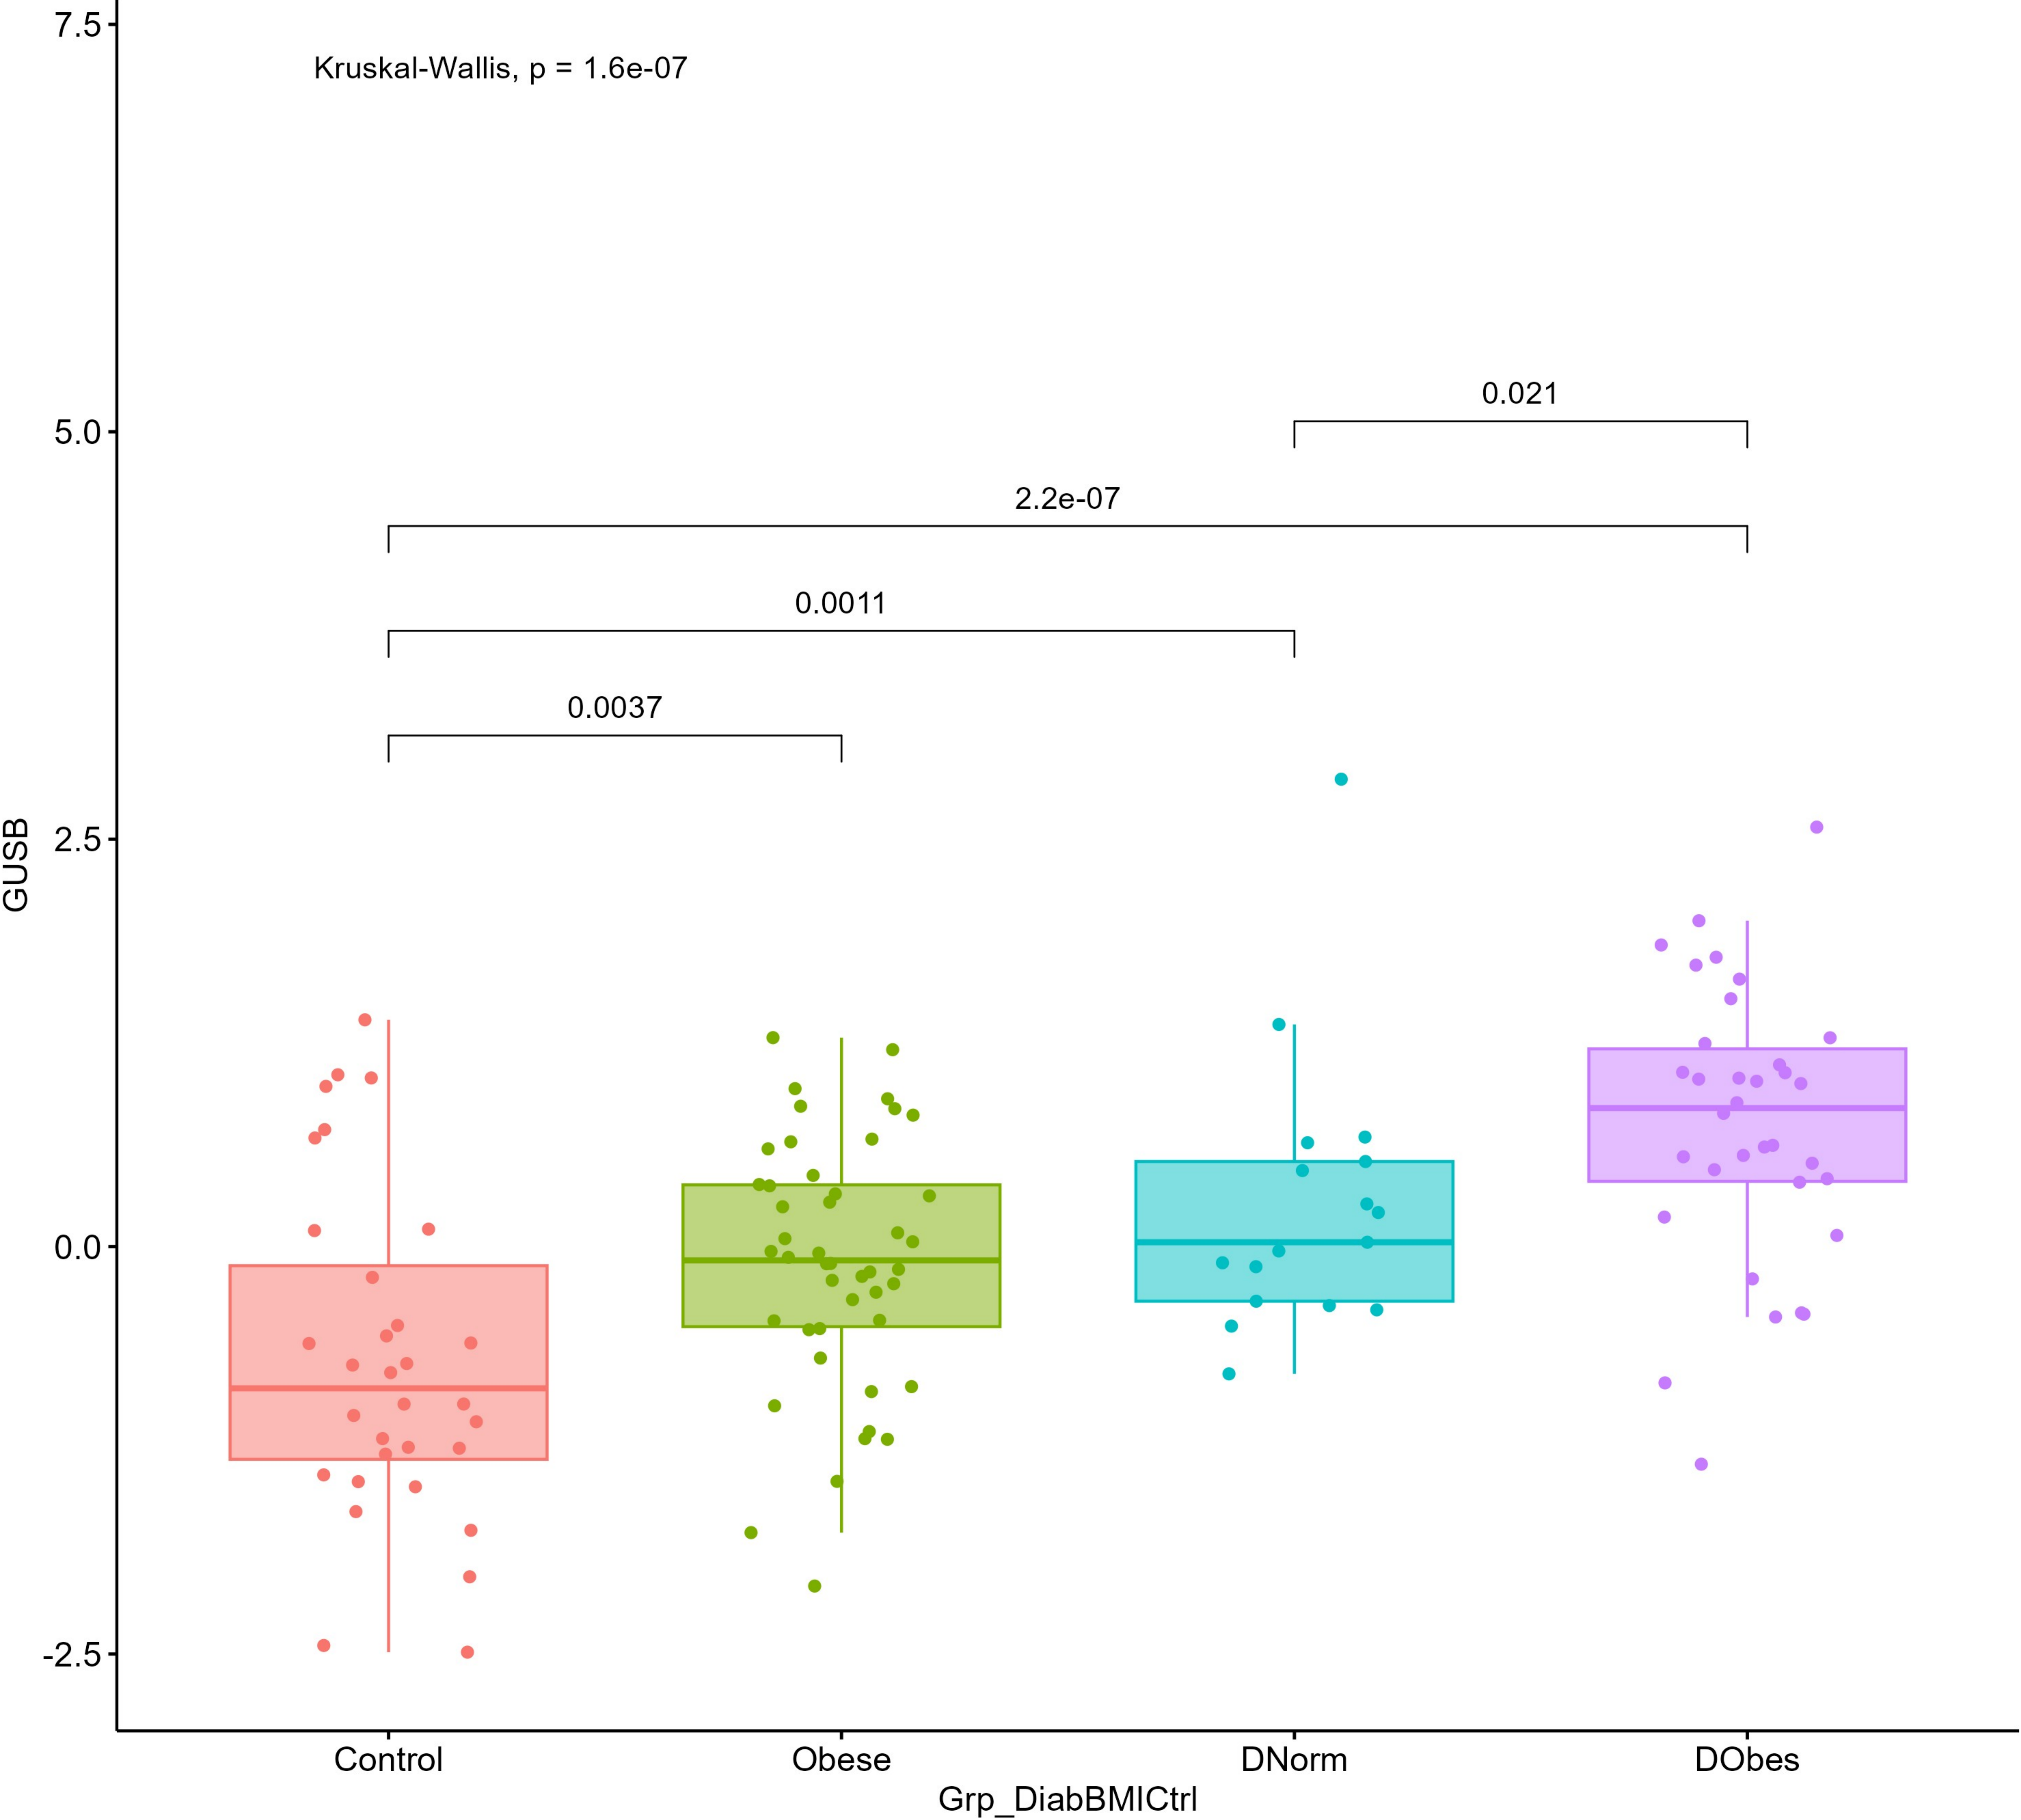

# Grp\_DiabBMICtrl

Grp\_DiabBMICtrl Control Obese DNorm DObes

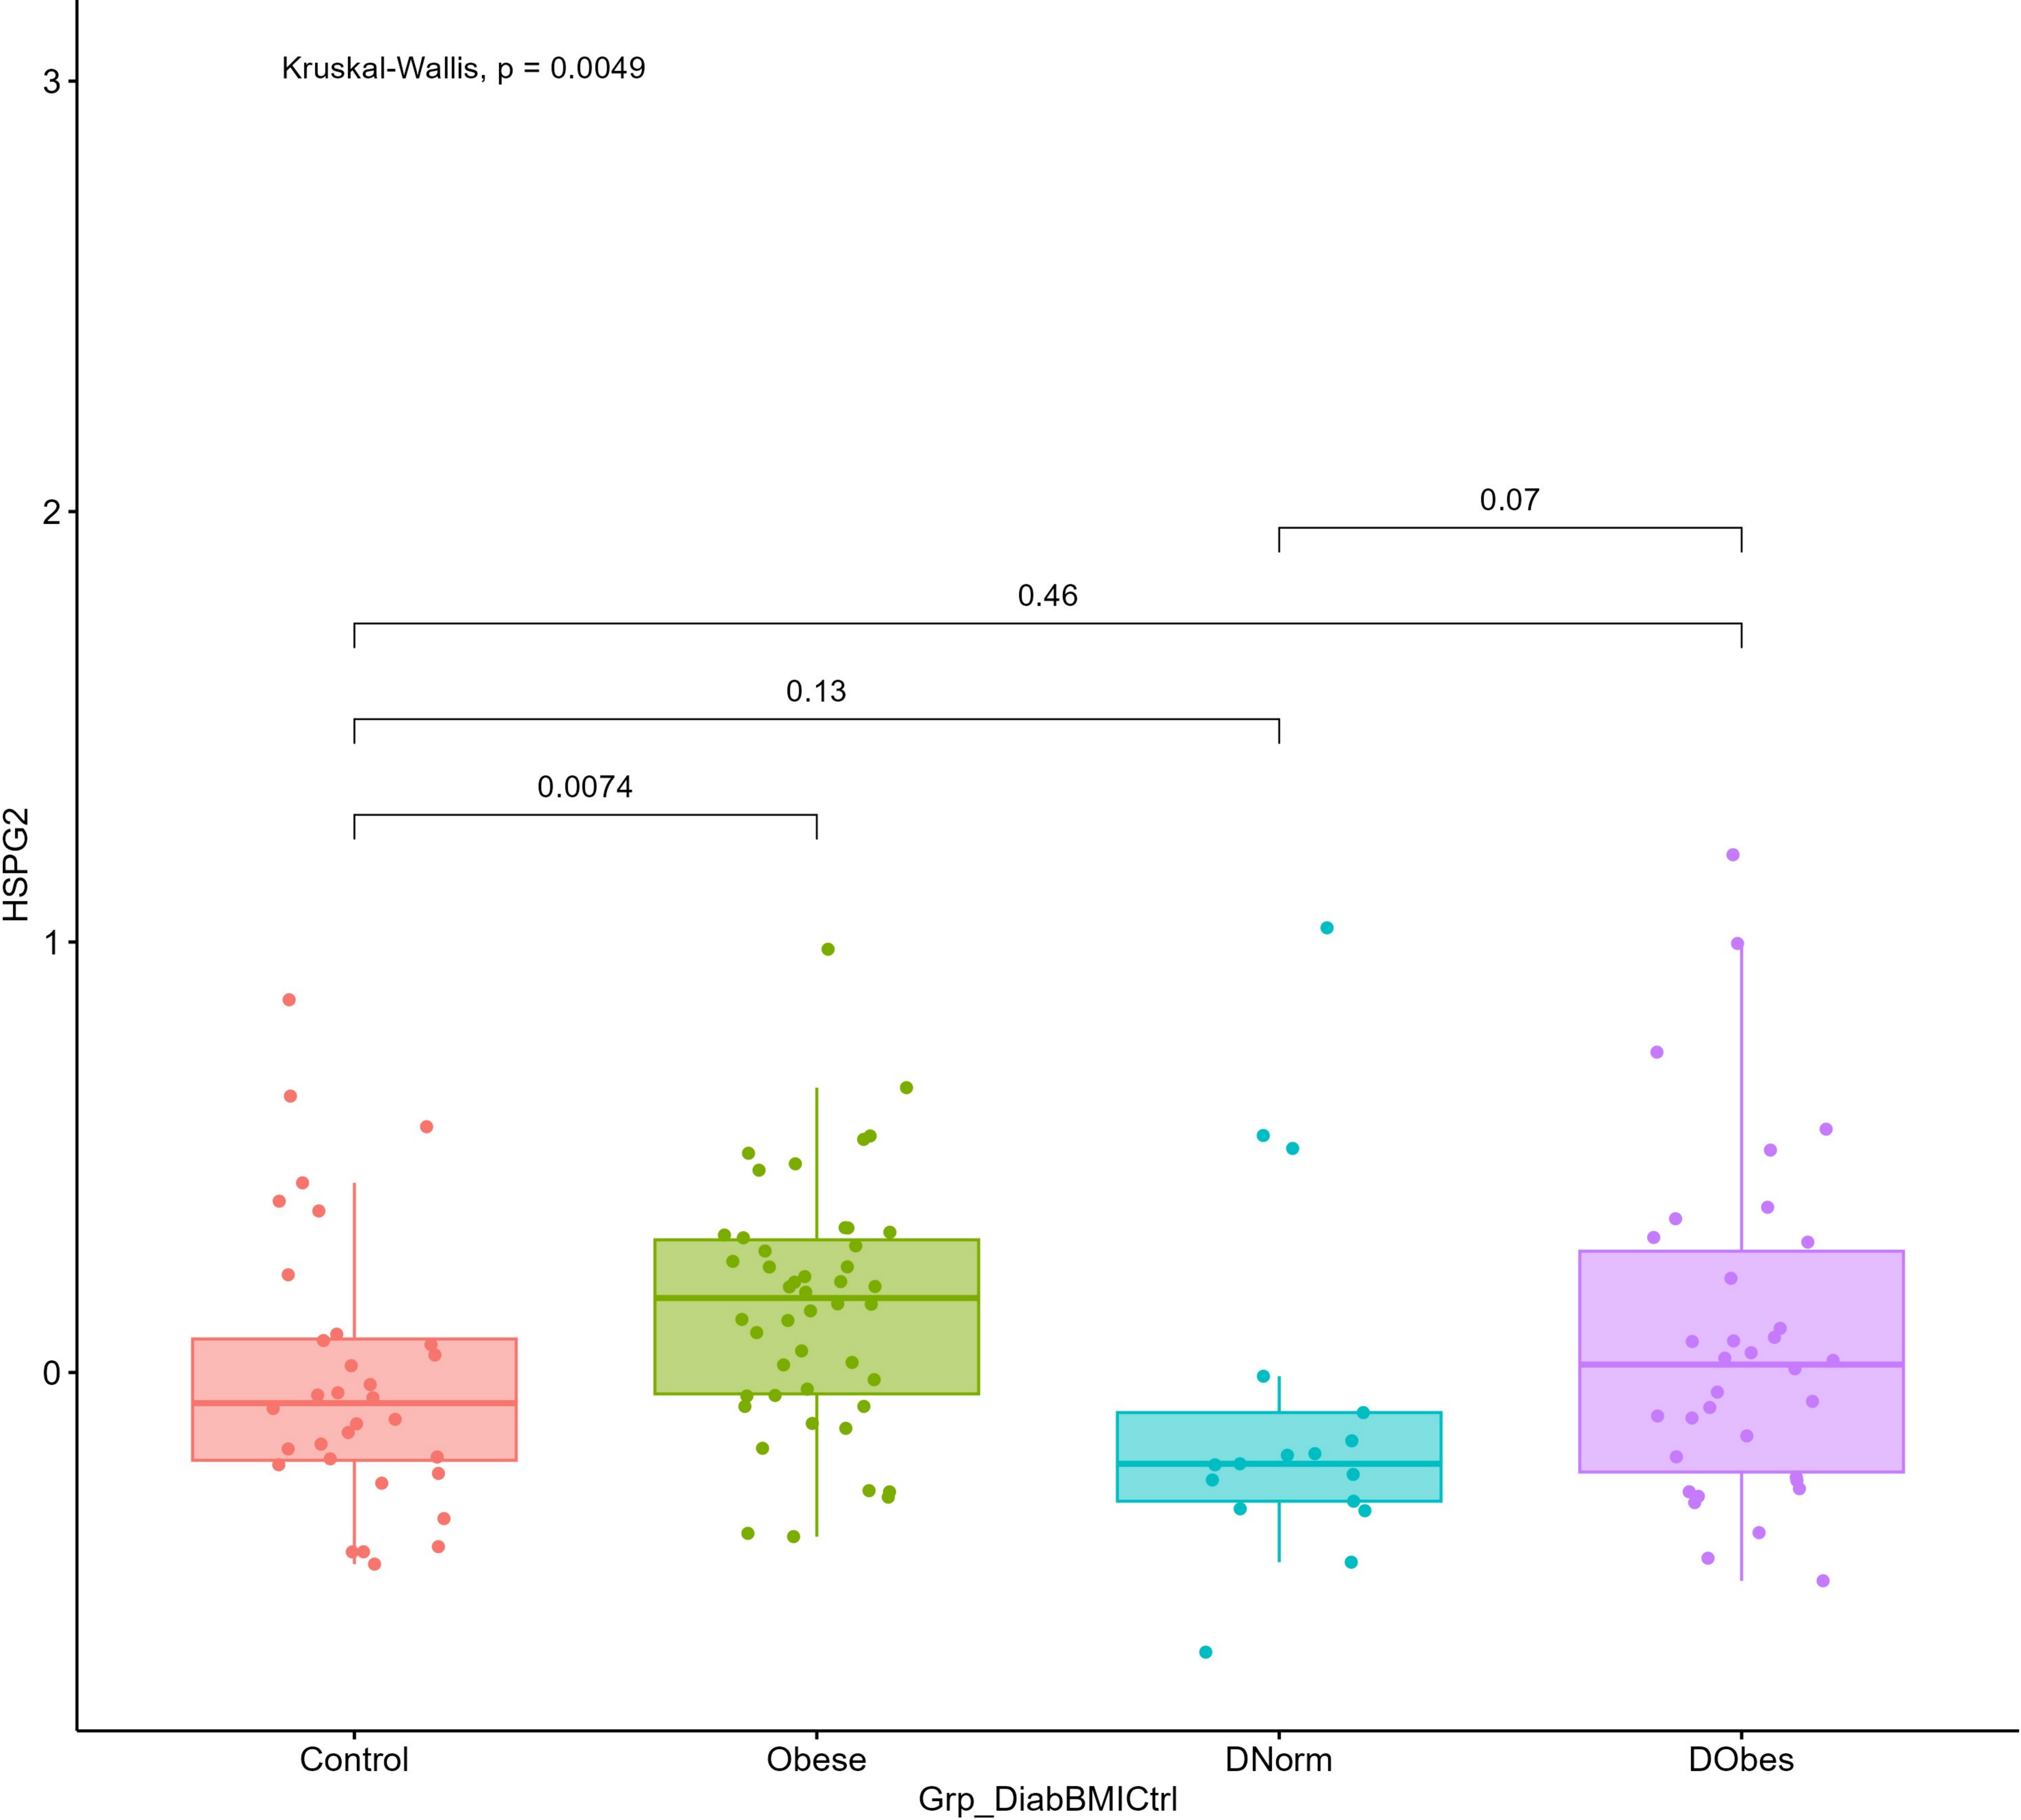

# Grp\_DiabBMICtrl

Grp\_DiabBMICtrl Control Obese DNorm DObes

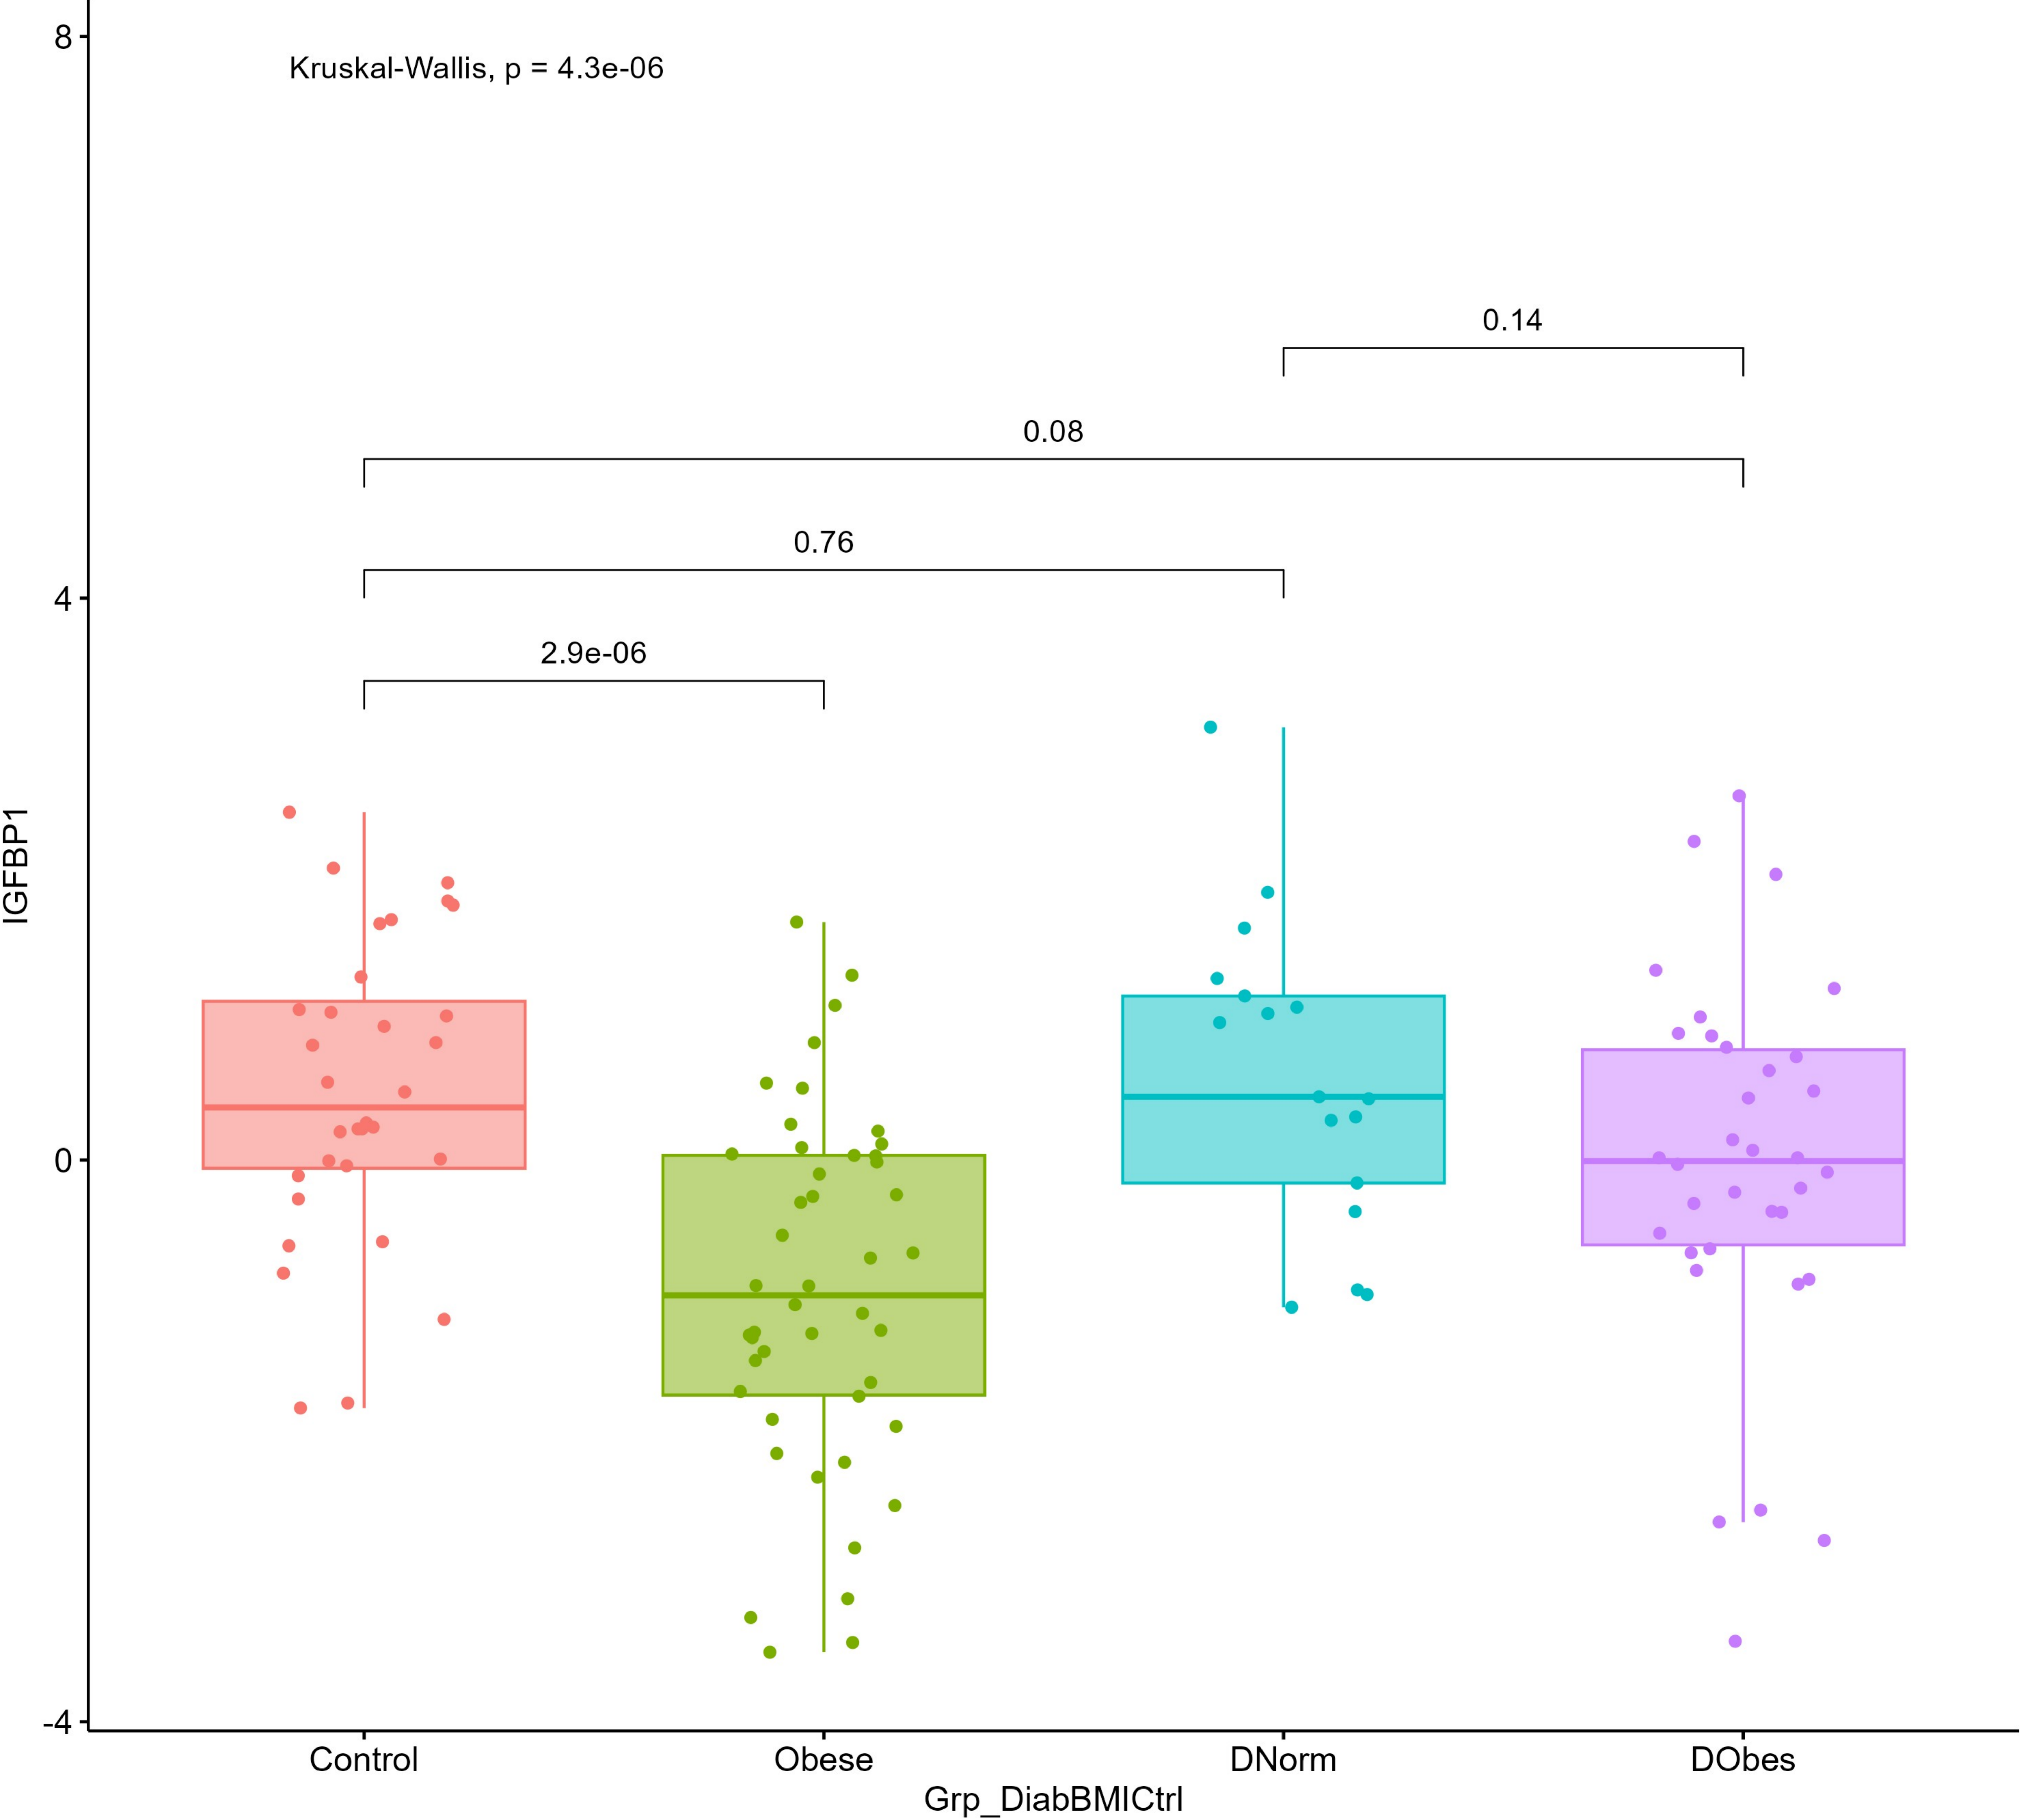

# Grp\_DiabBMICtrl

Grp\_DiabBMICtrl Control Obese DNorm DObes

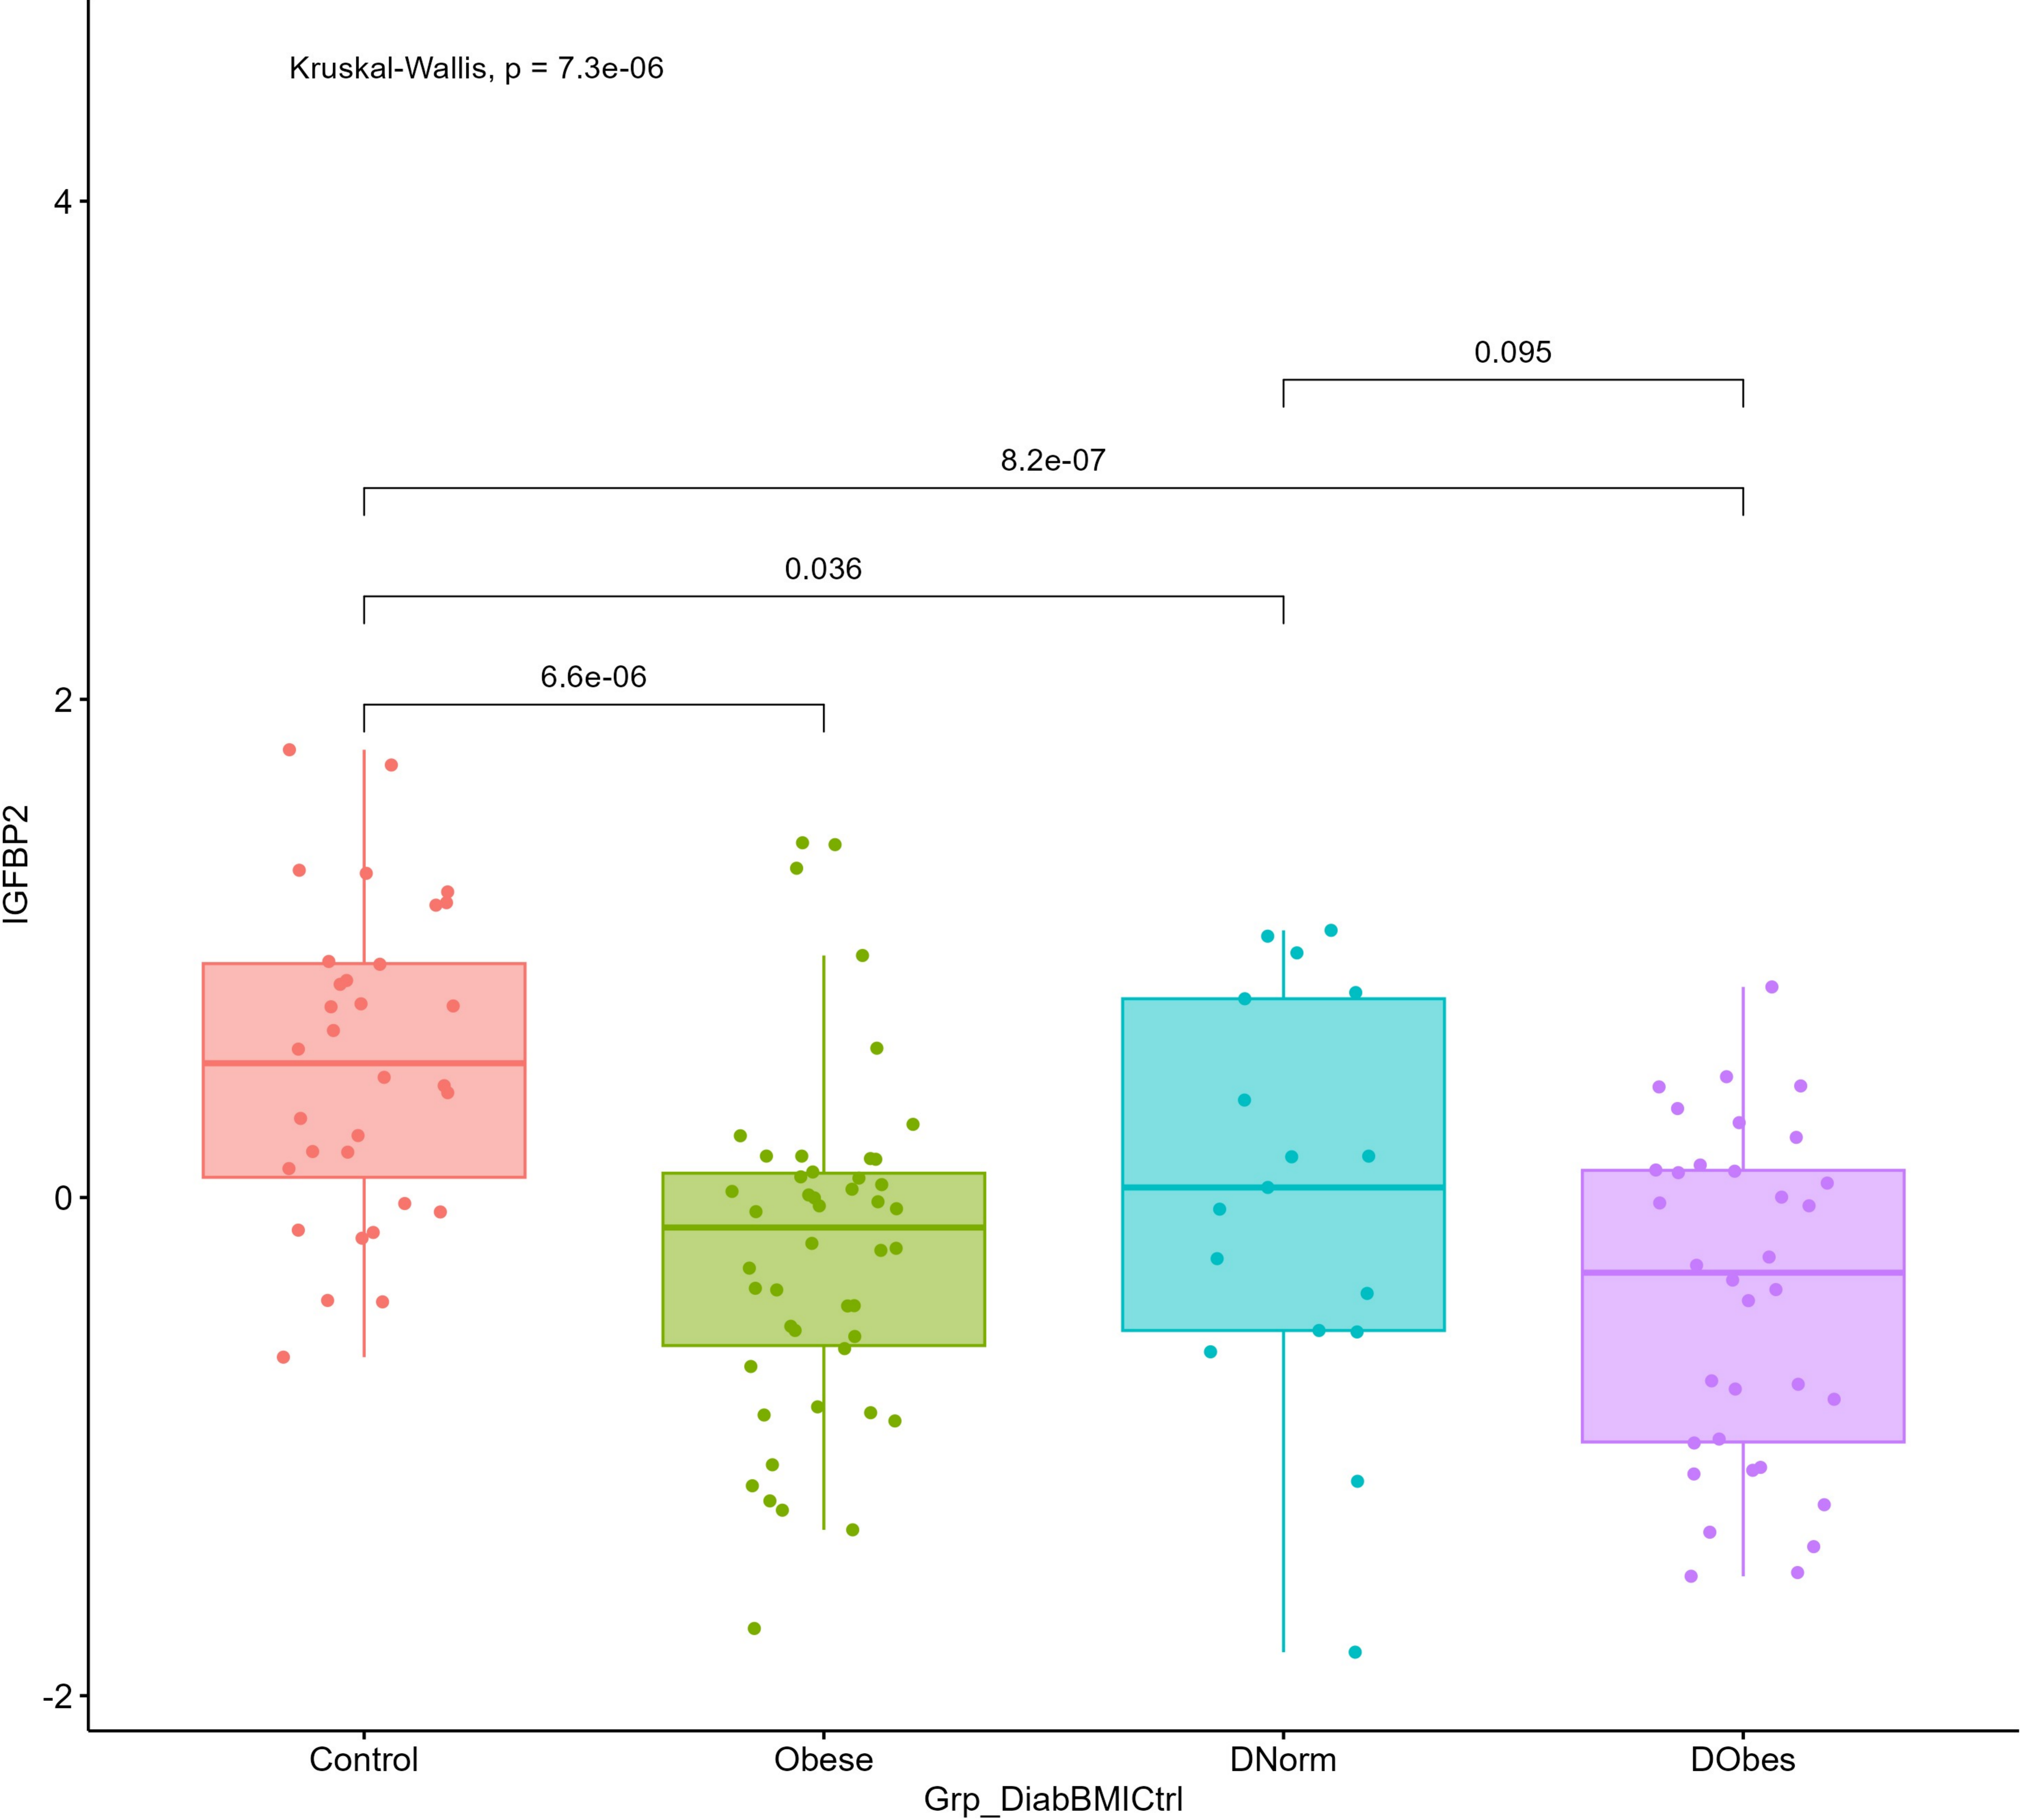

# Grp\_DiabBMICtrl

Grp\_DiabBMICtrl Control Obese DNorm DObes

Kruskal-Wallis,  $p = 0.0013$

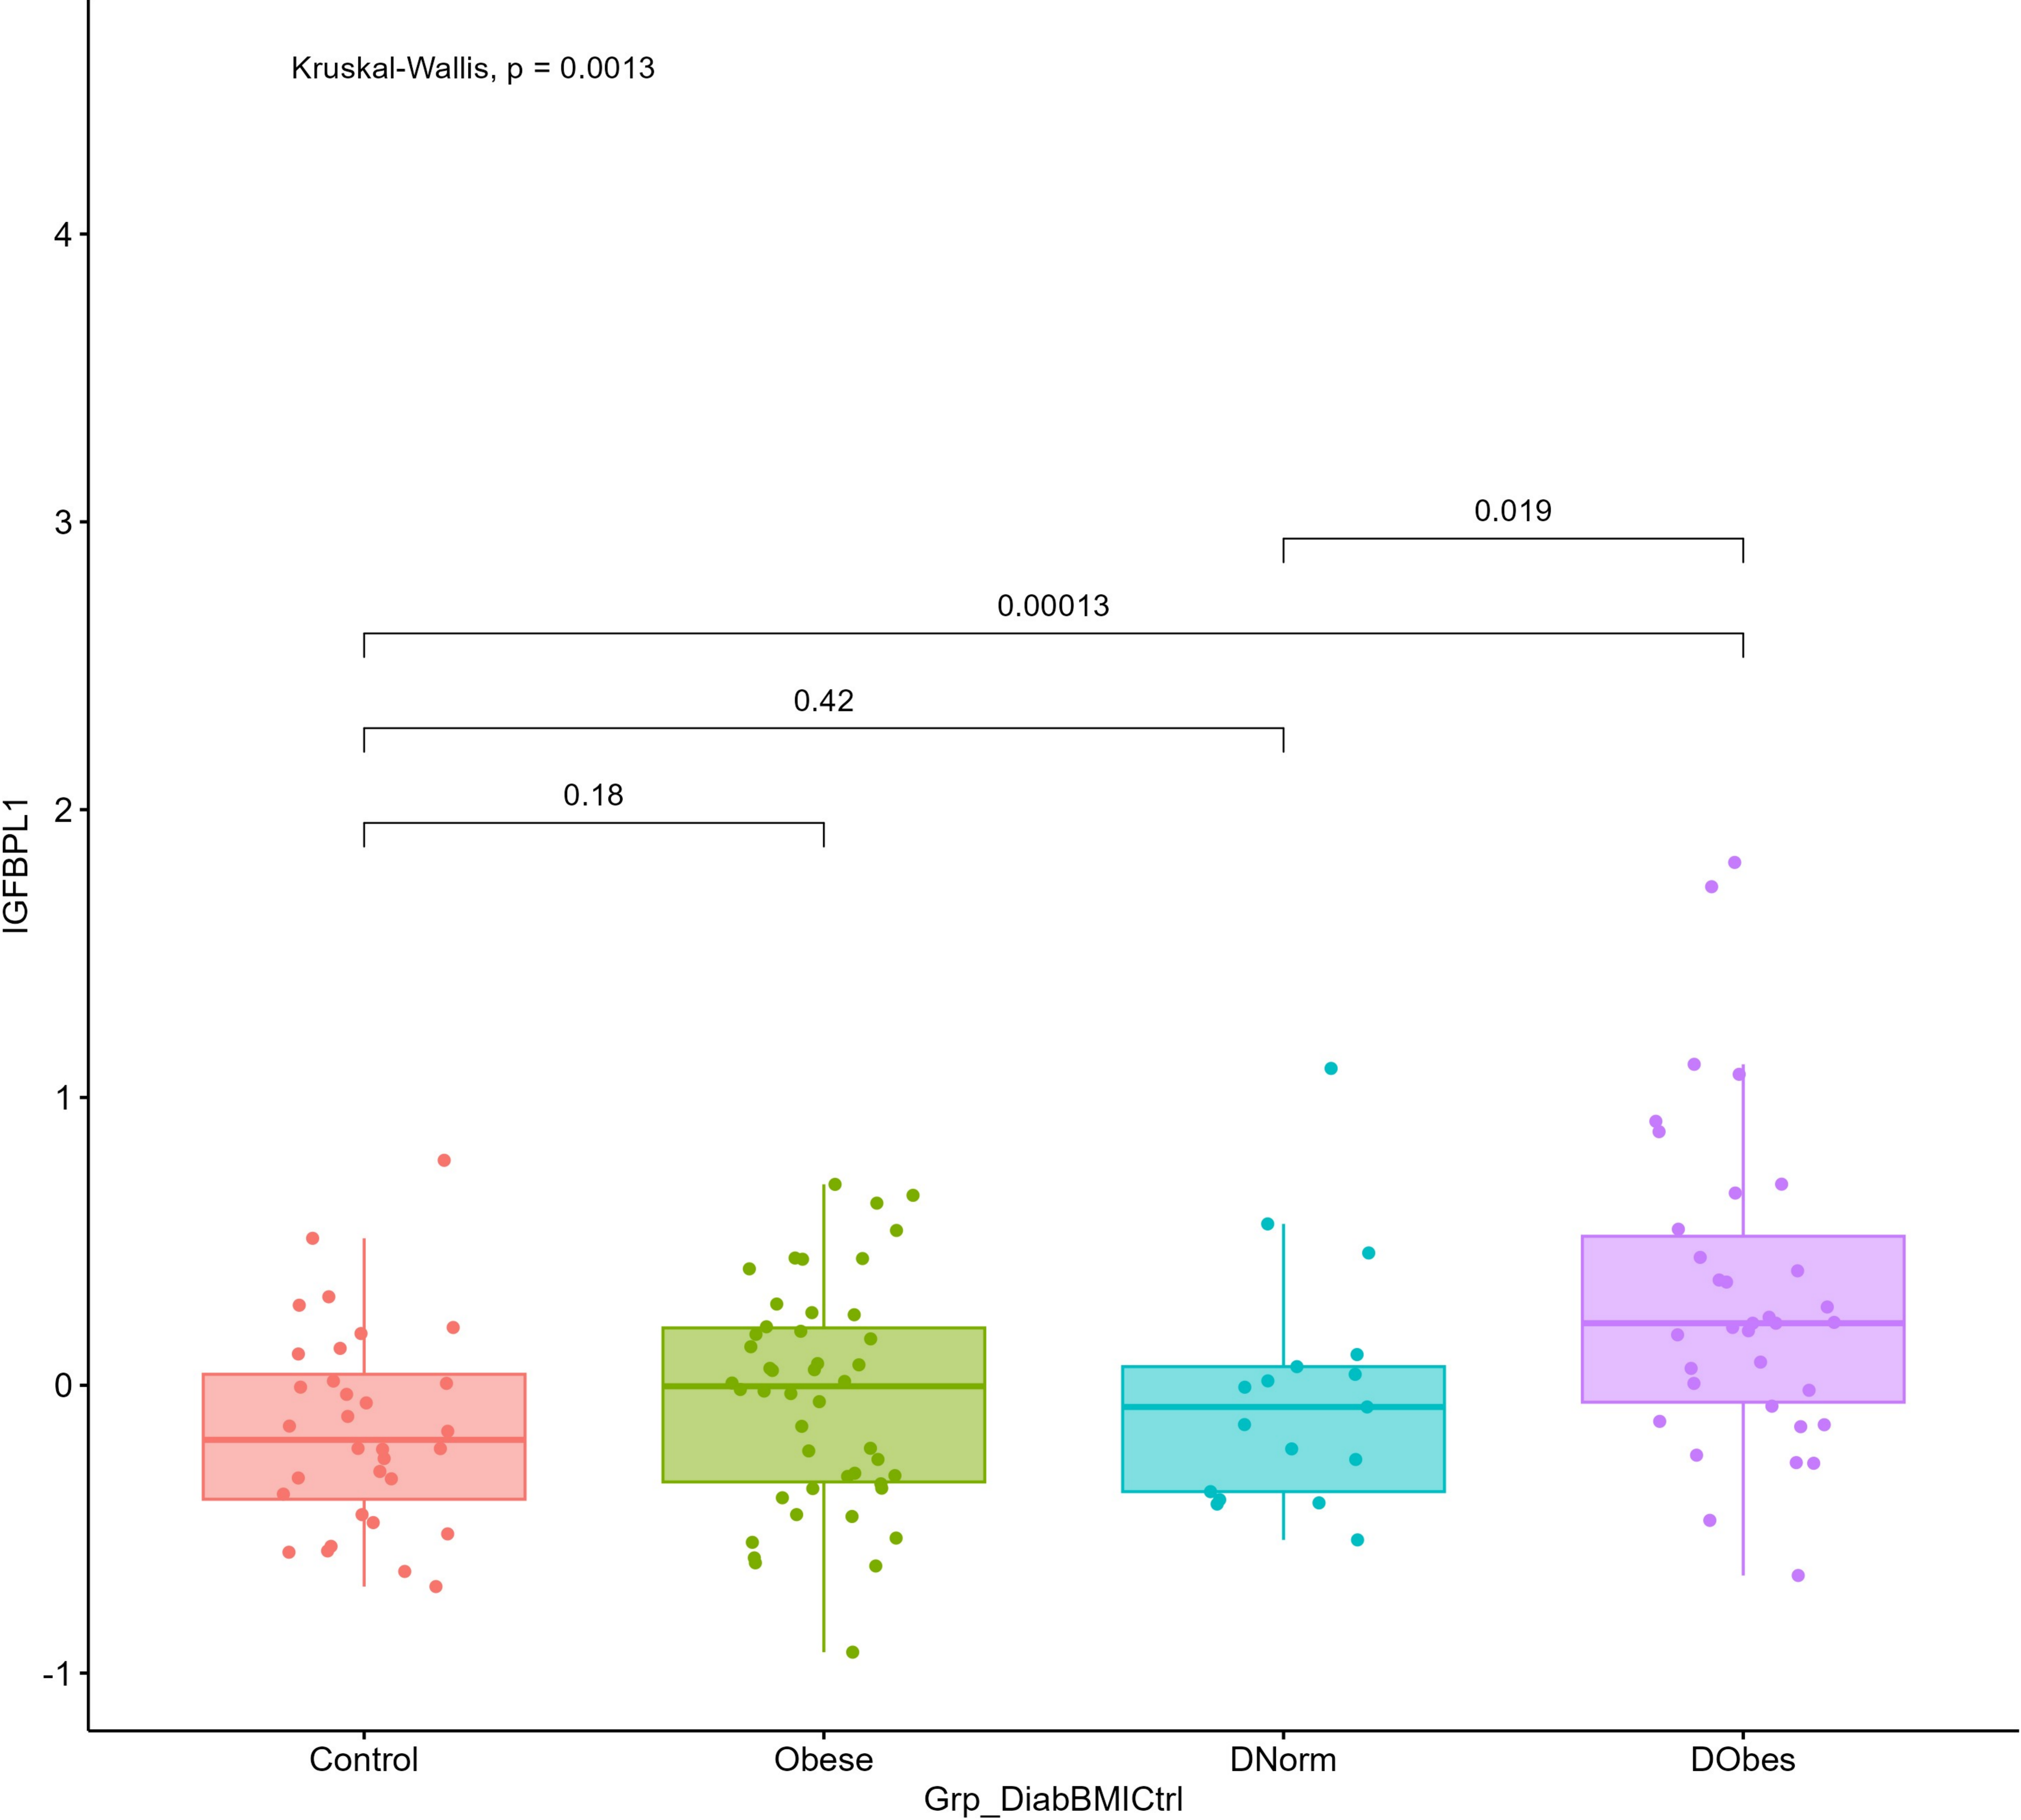

# Grp\_DiabBMICtrl

Grp\_DiabBMICtrl Control Obese DNorm DObes

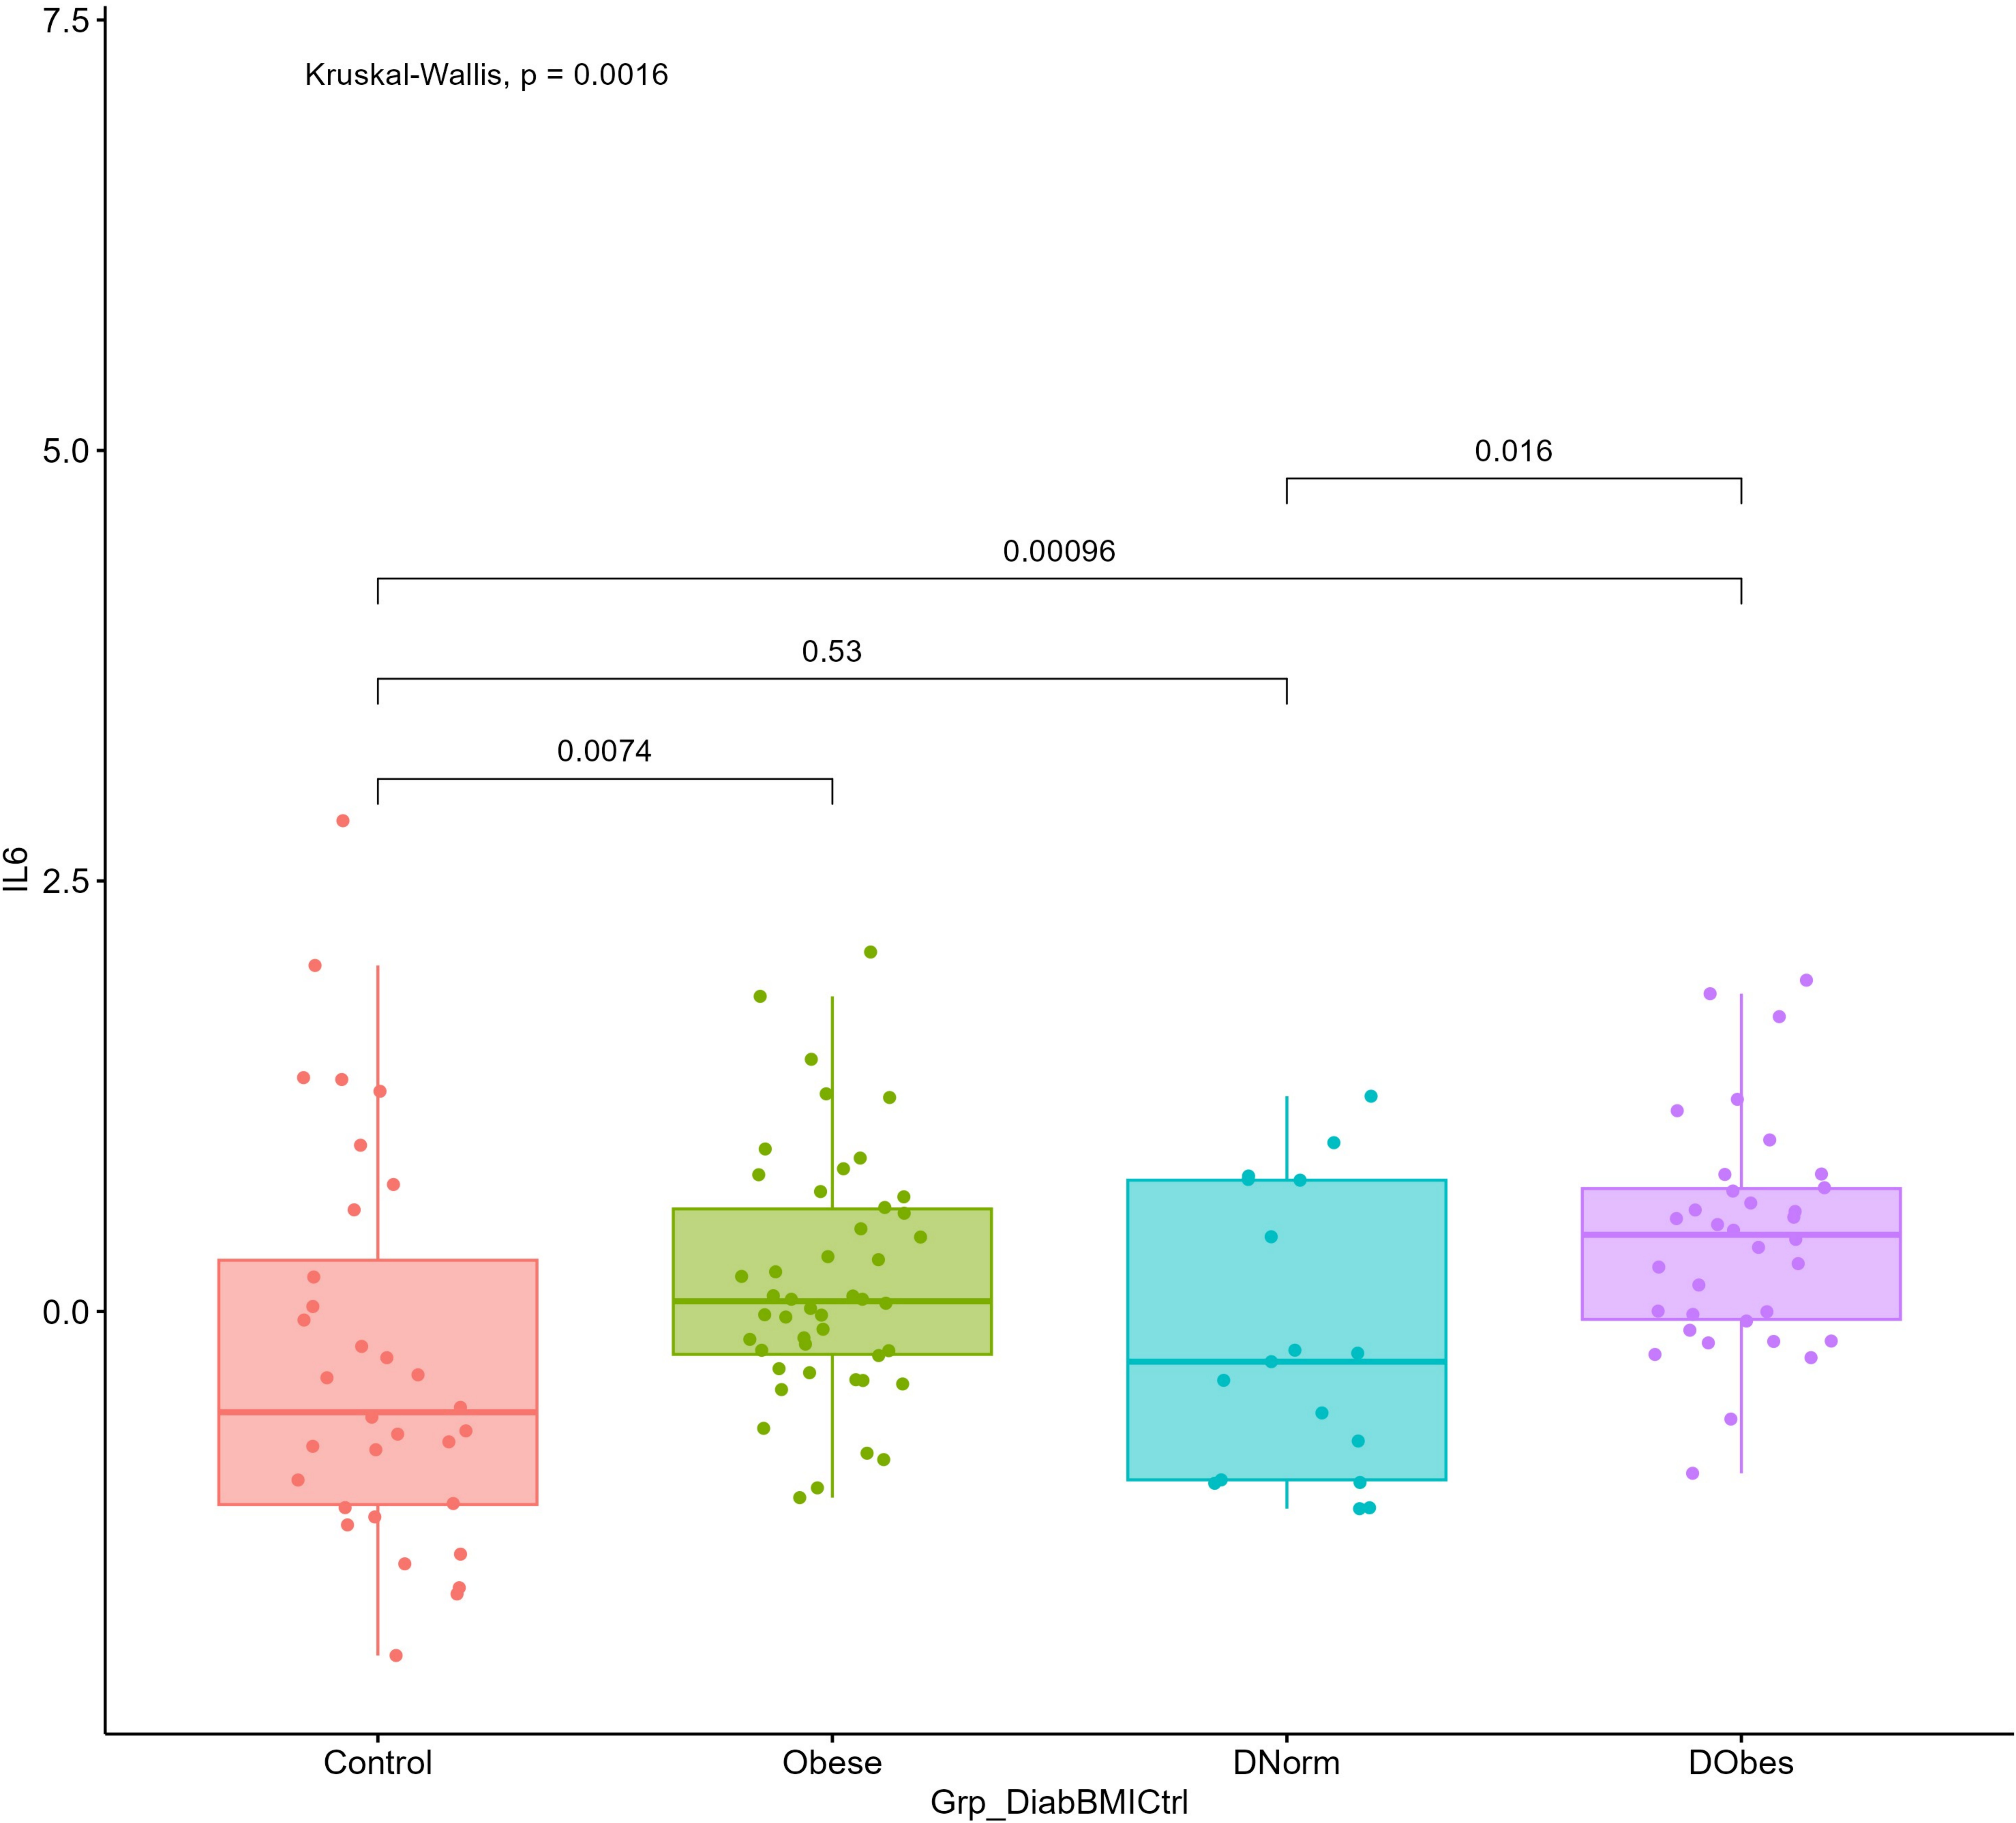

# Grp\_DiabBMICtrl

Grp\_DiabBMICtrl Control Obese DNorm DObes

Kruskal-Wallis, p = 0.0075

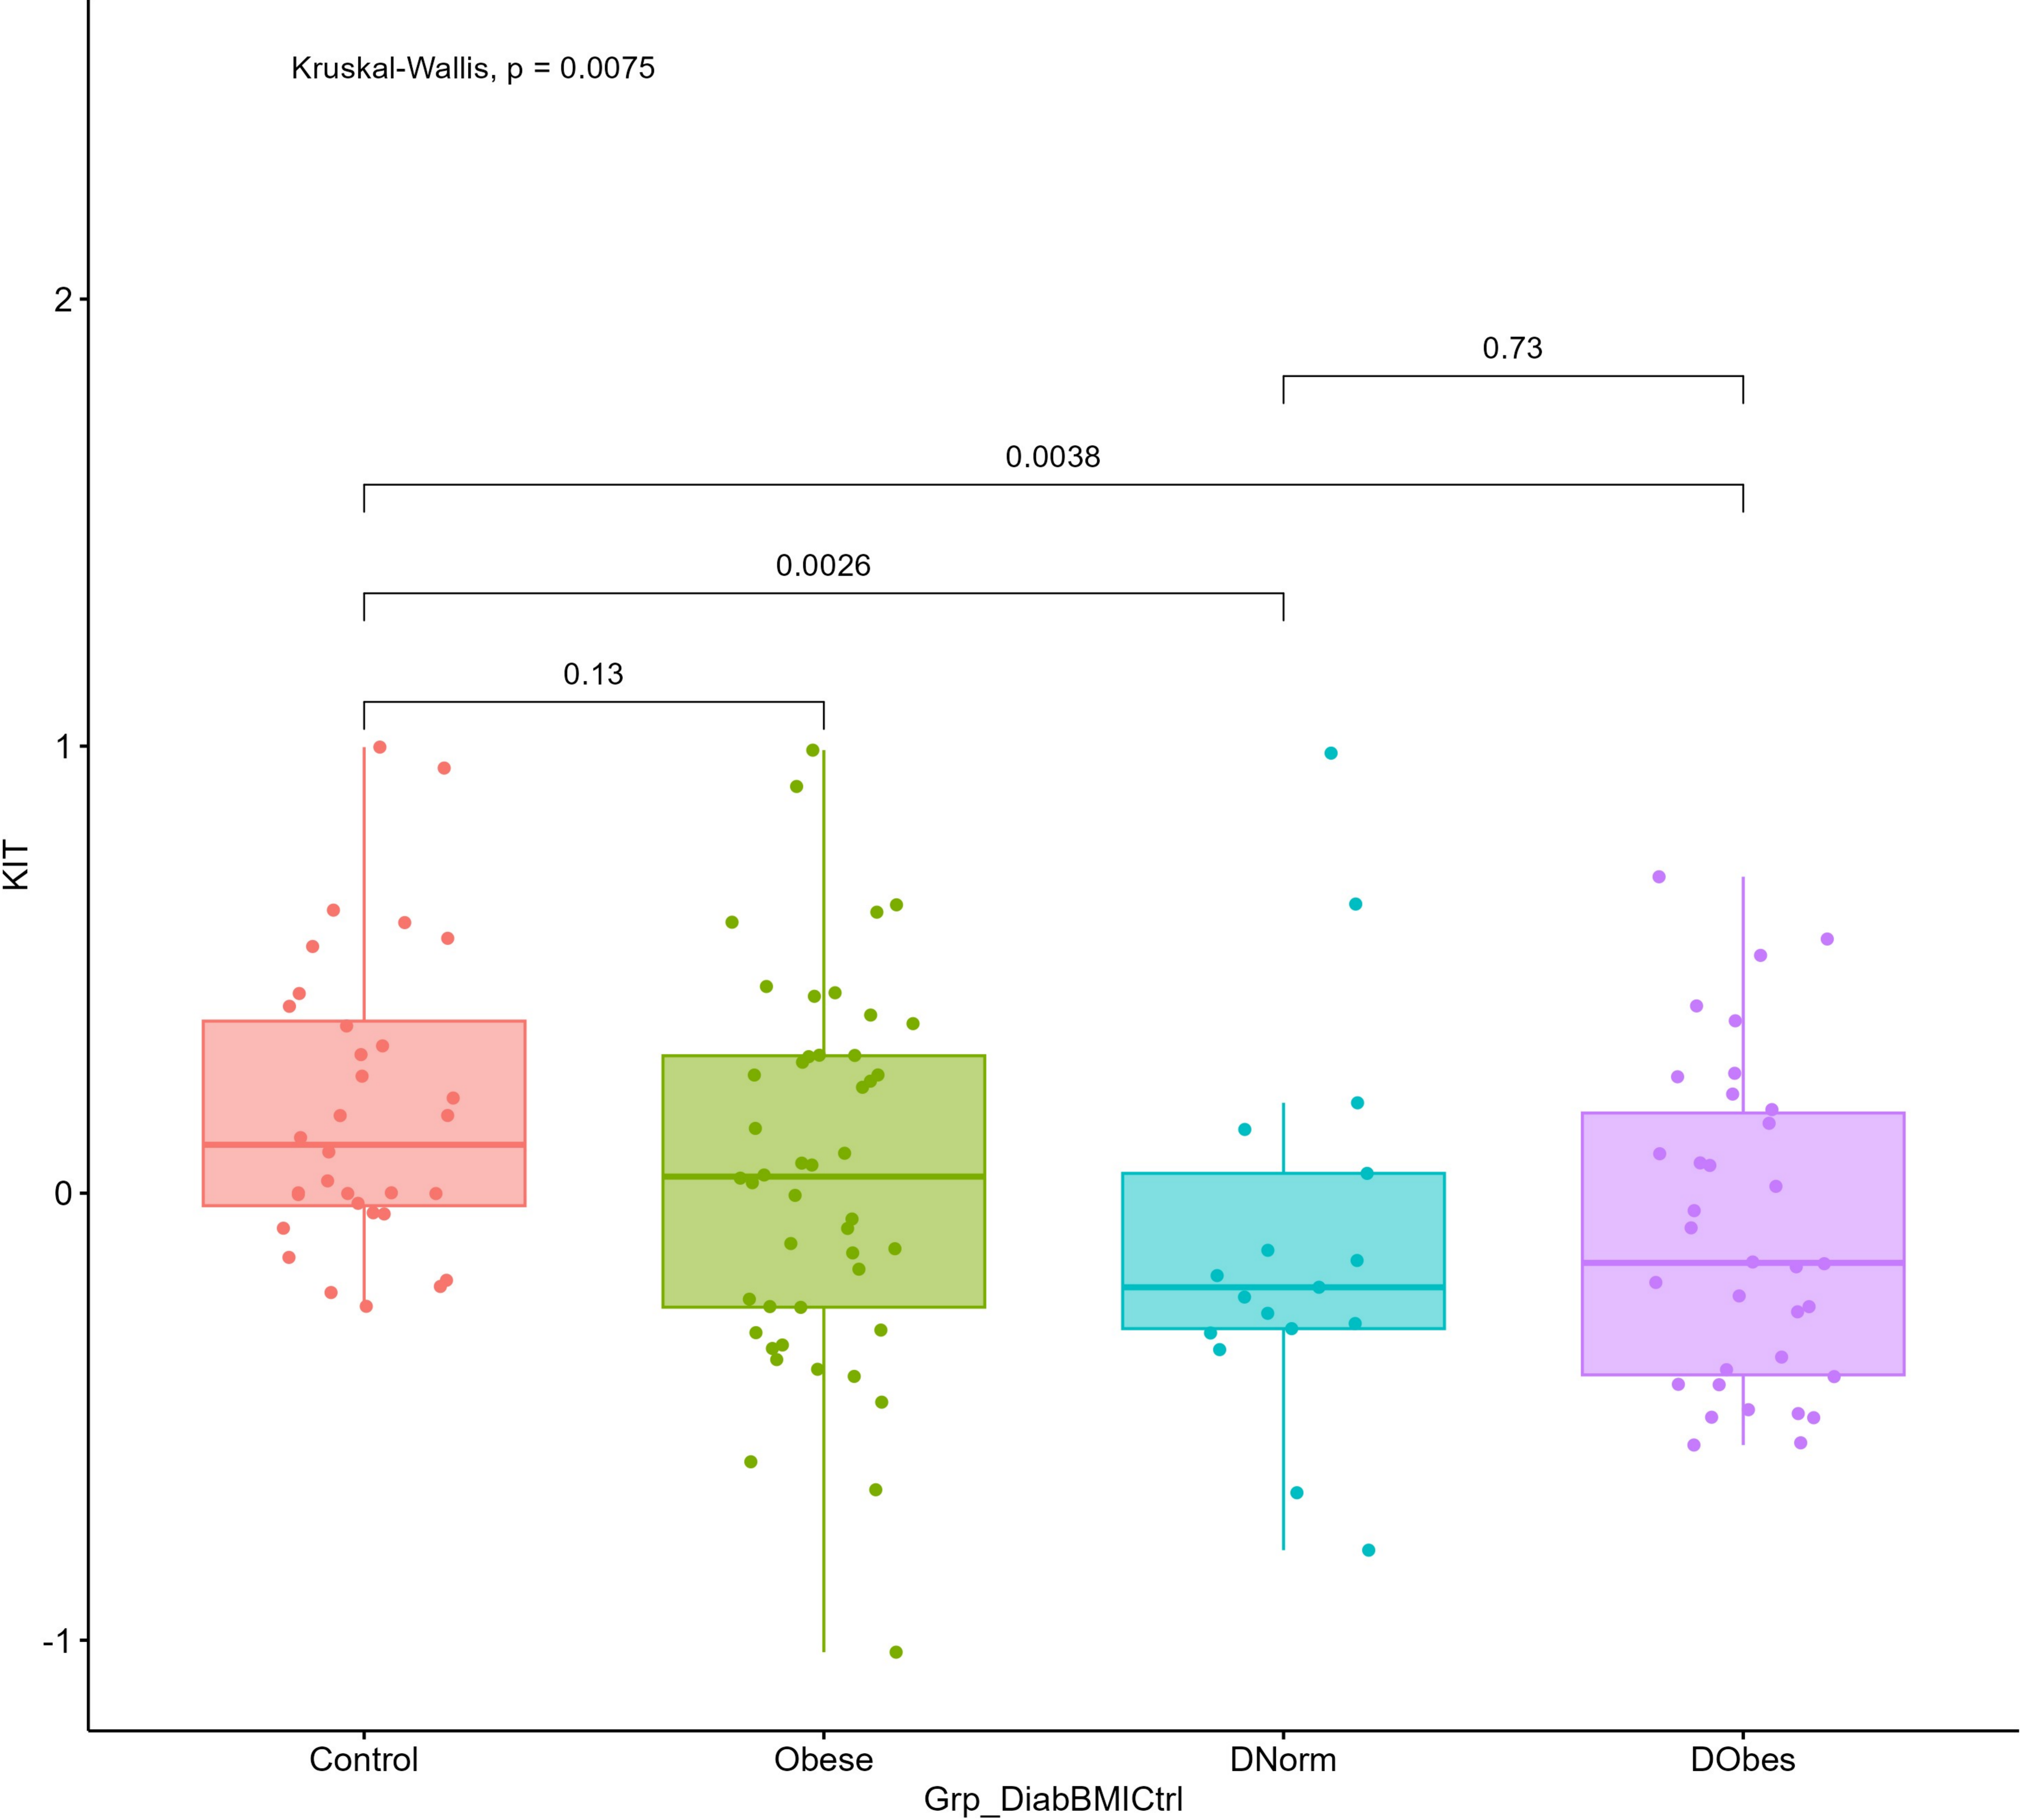

# Grp\_DiabBMICtrl

Grp\_DiabBMICtrl Control Obese DNorm DObes

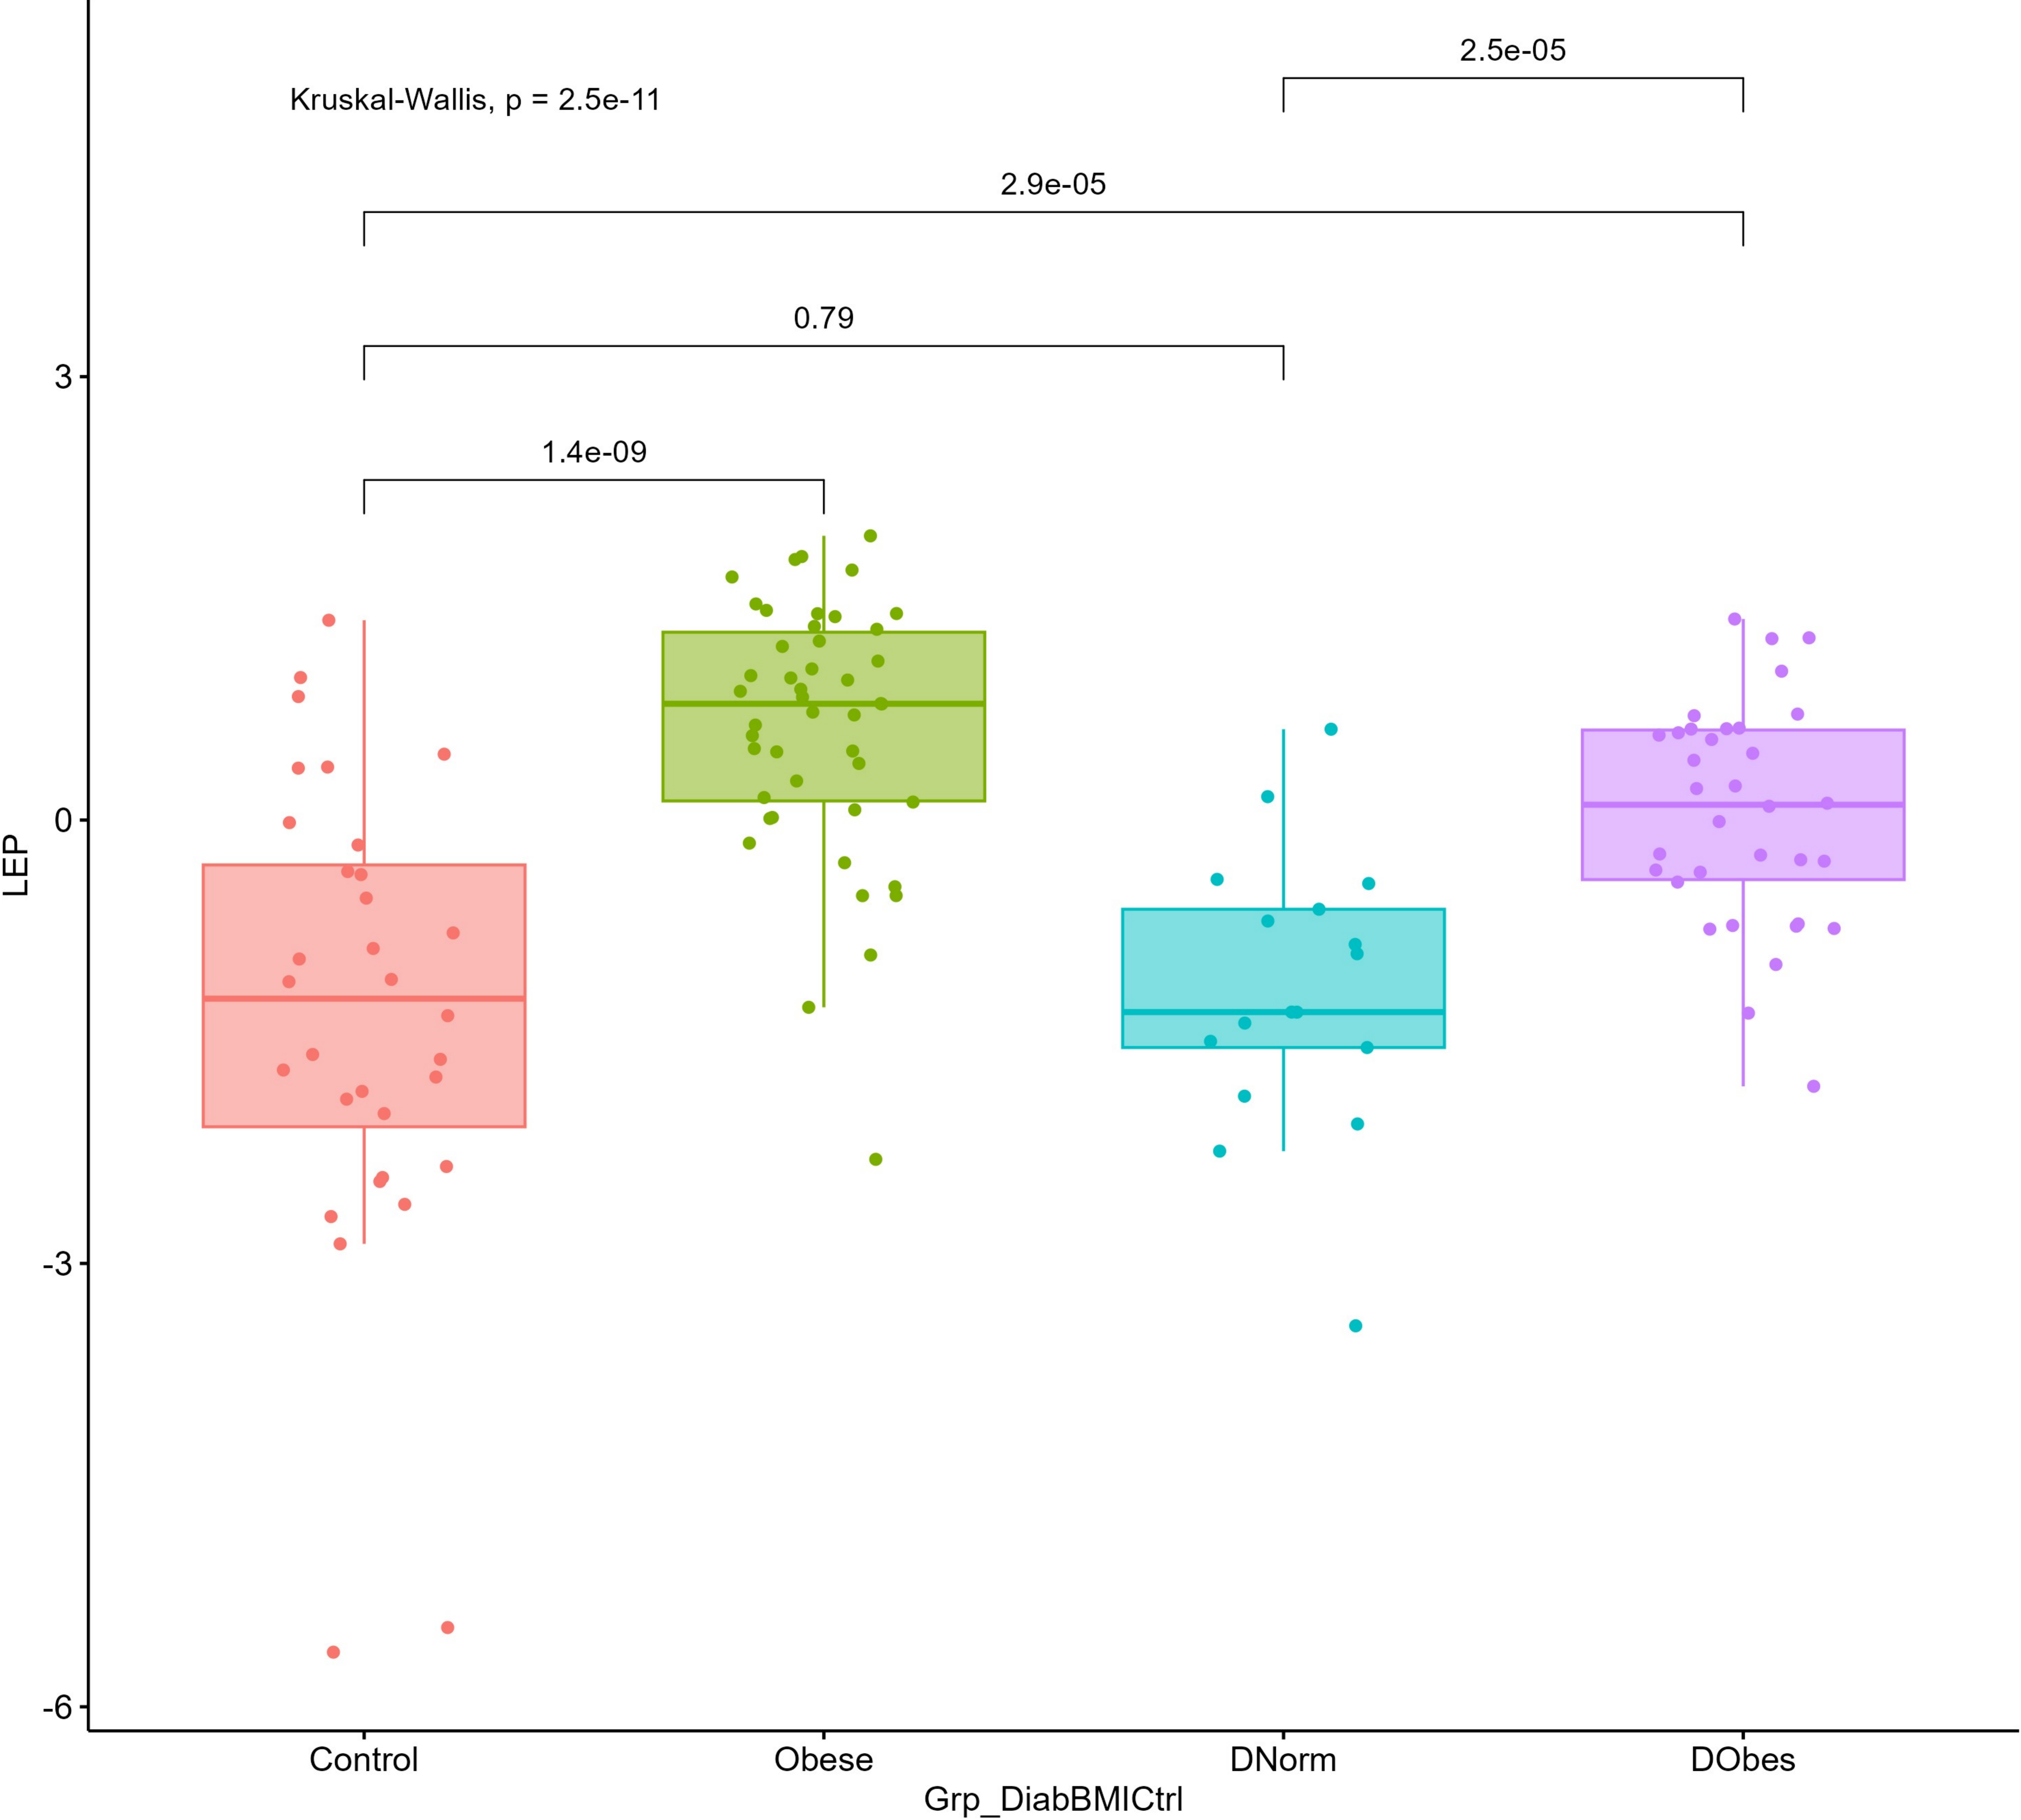

# Grp\_DiabBMICtrl

Grp\_DiabBMICtrl Control Obese DNorm DObes

Kruskal-Wallis,  $p = 1.4e-05$

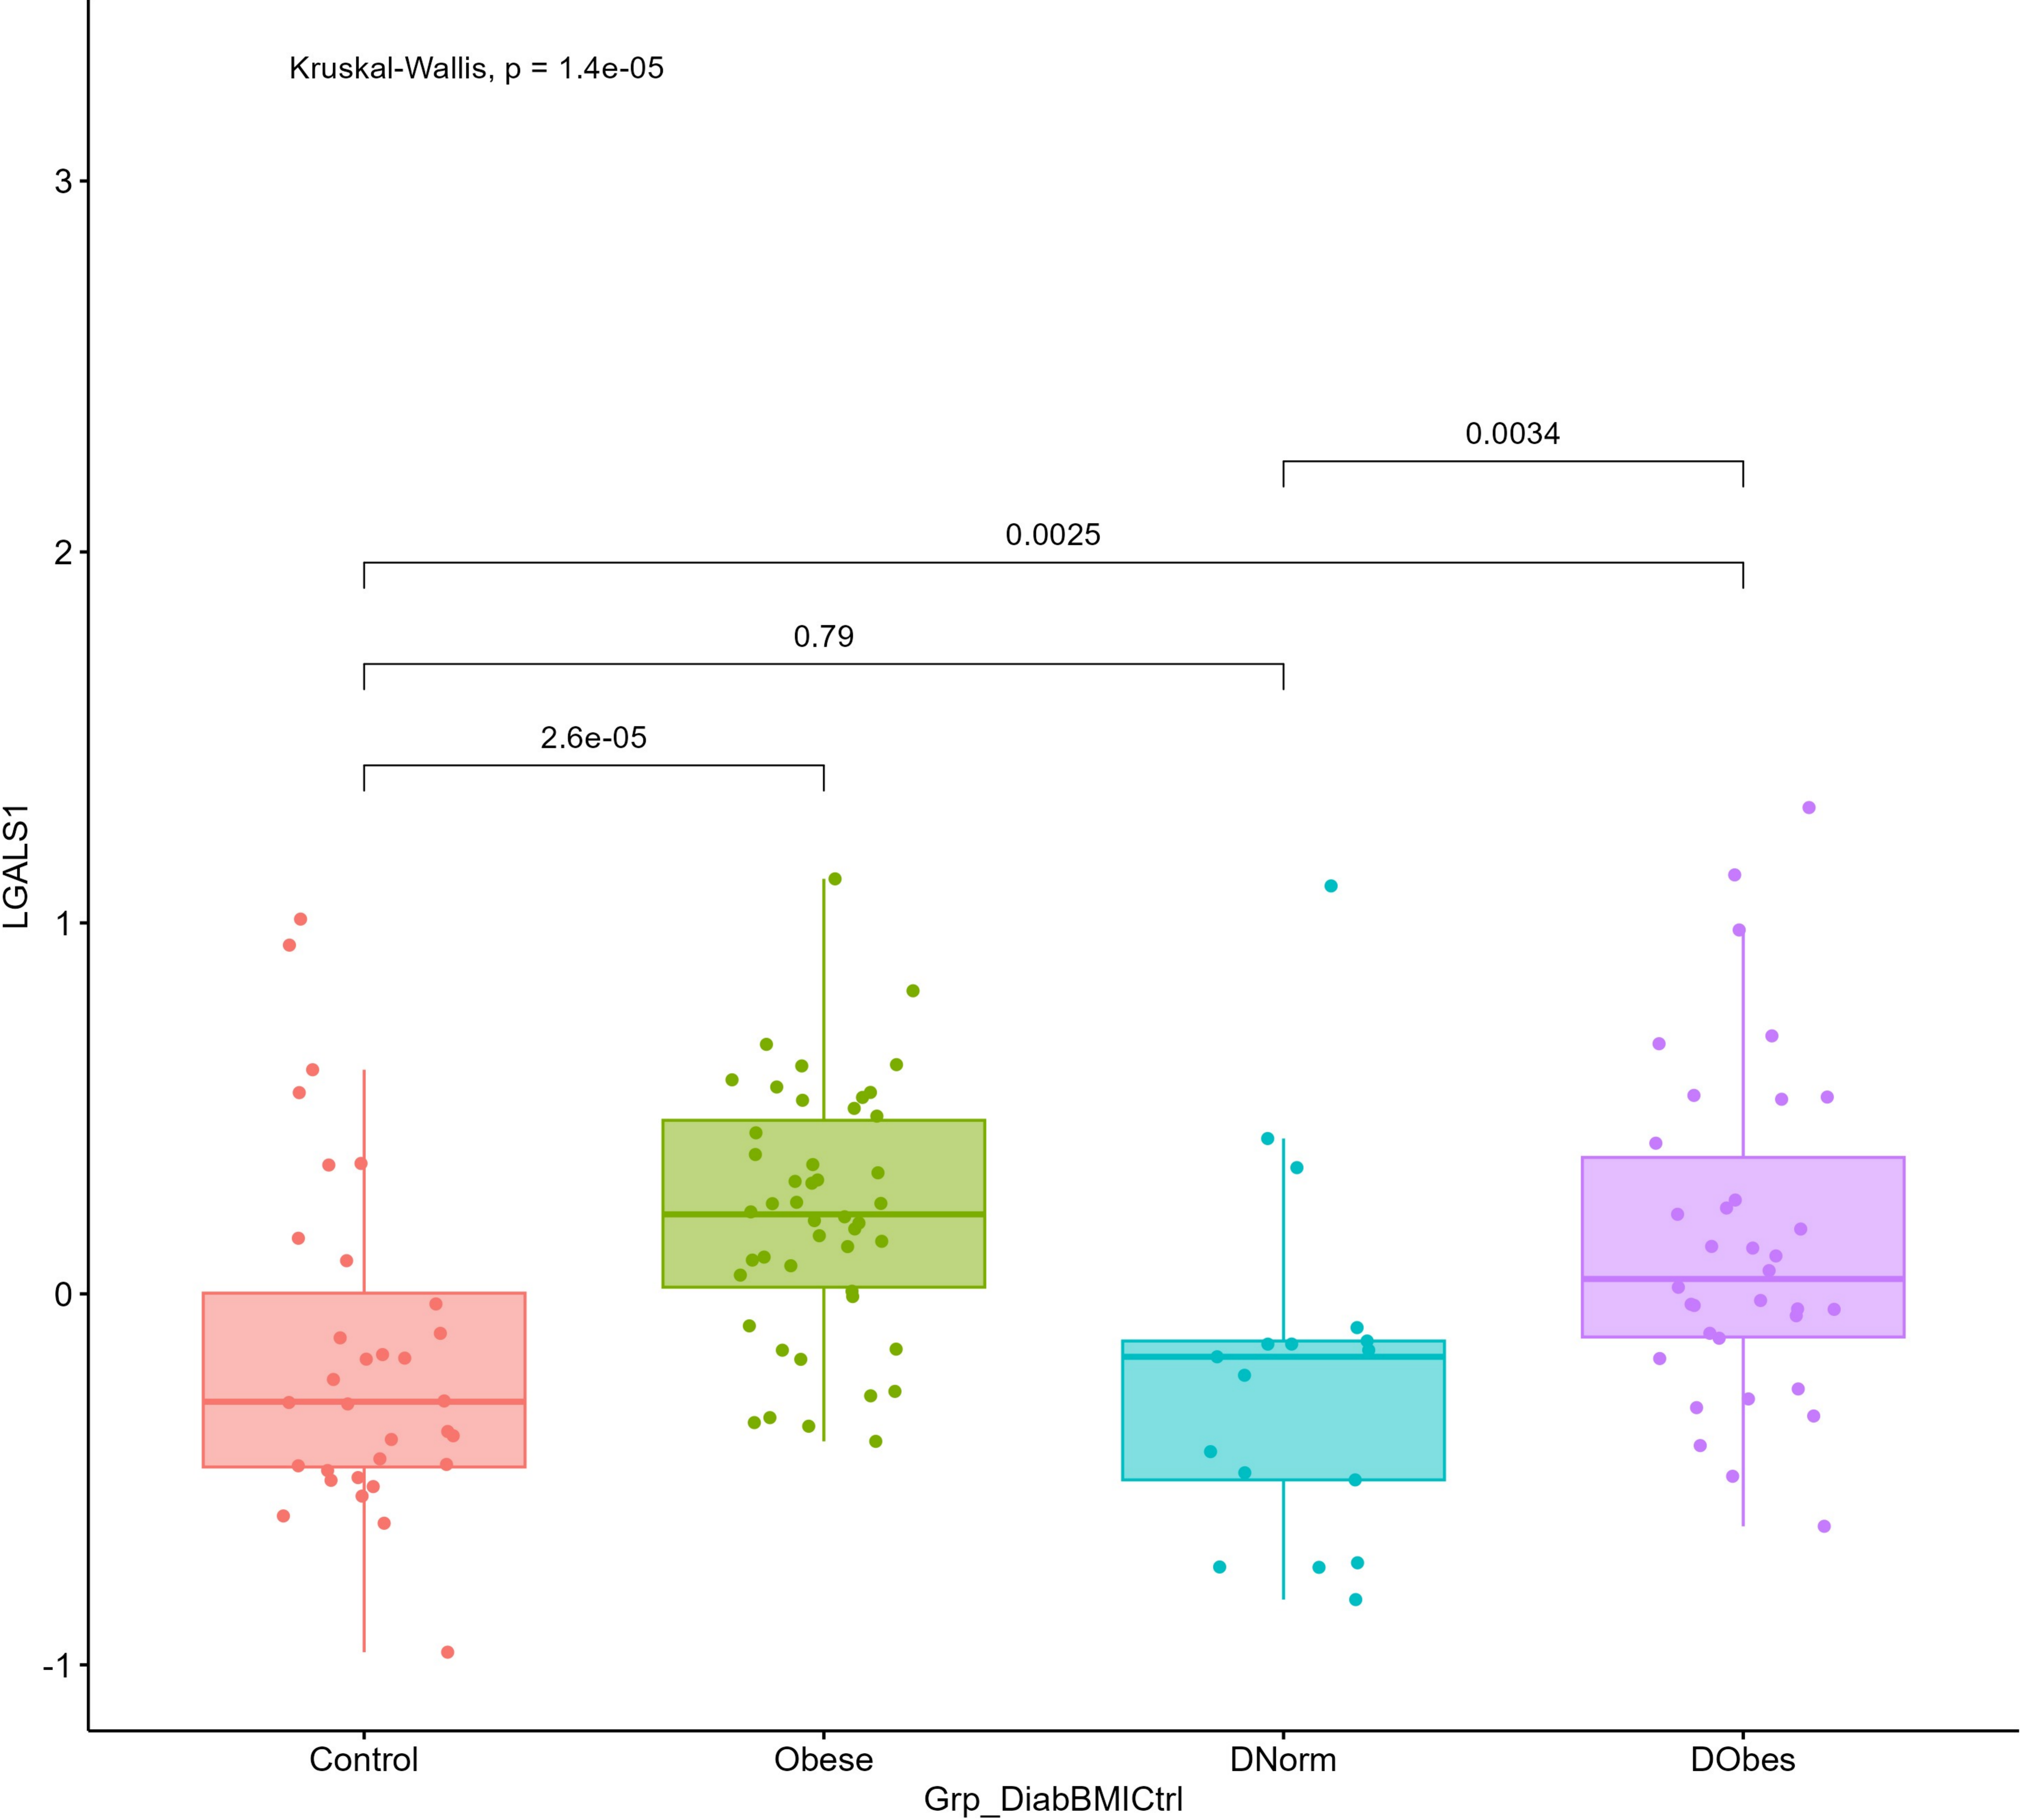

# Grp\_DiabBMICtrl

Grp\_DiabBMICtrl Control Obese DNorm DObes

Kruskal-Wallis, p = 0.013

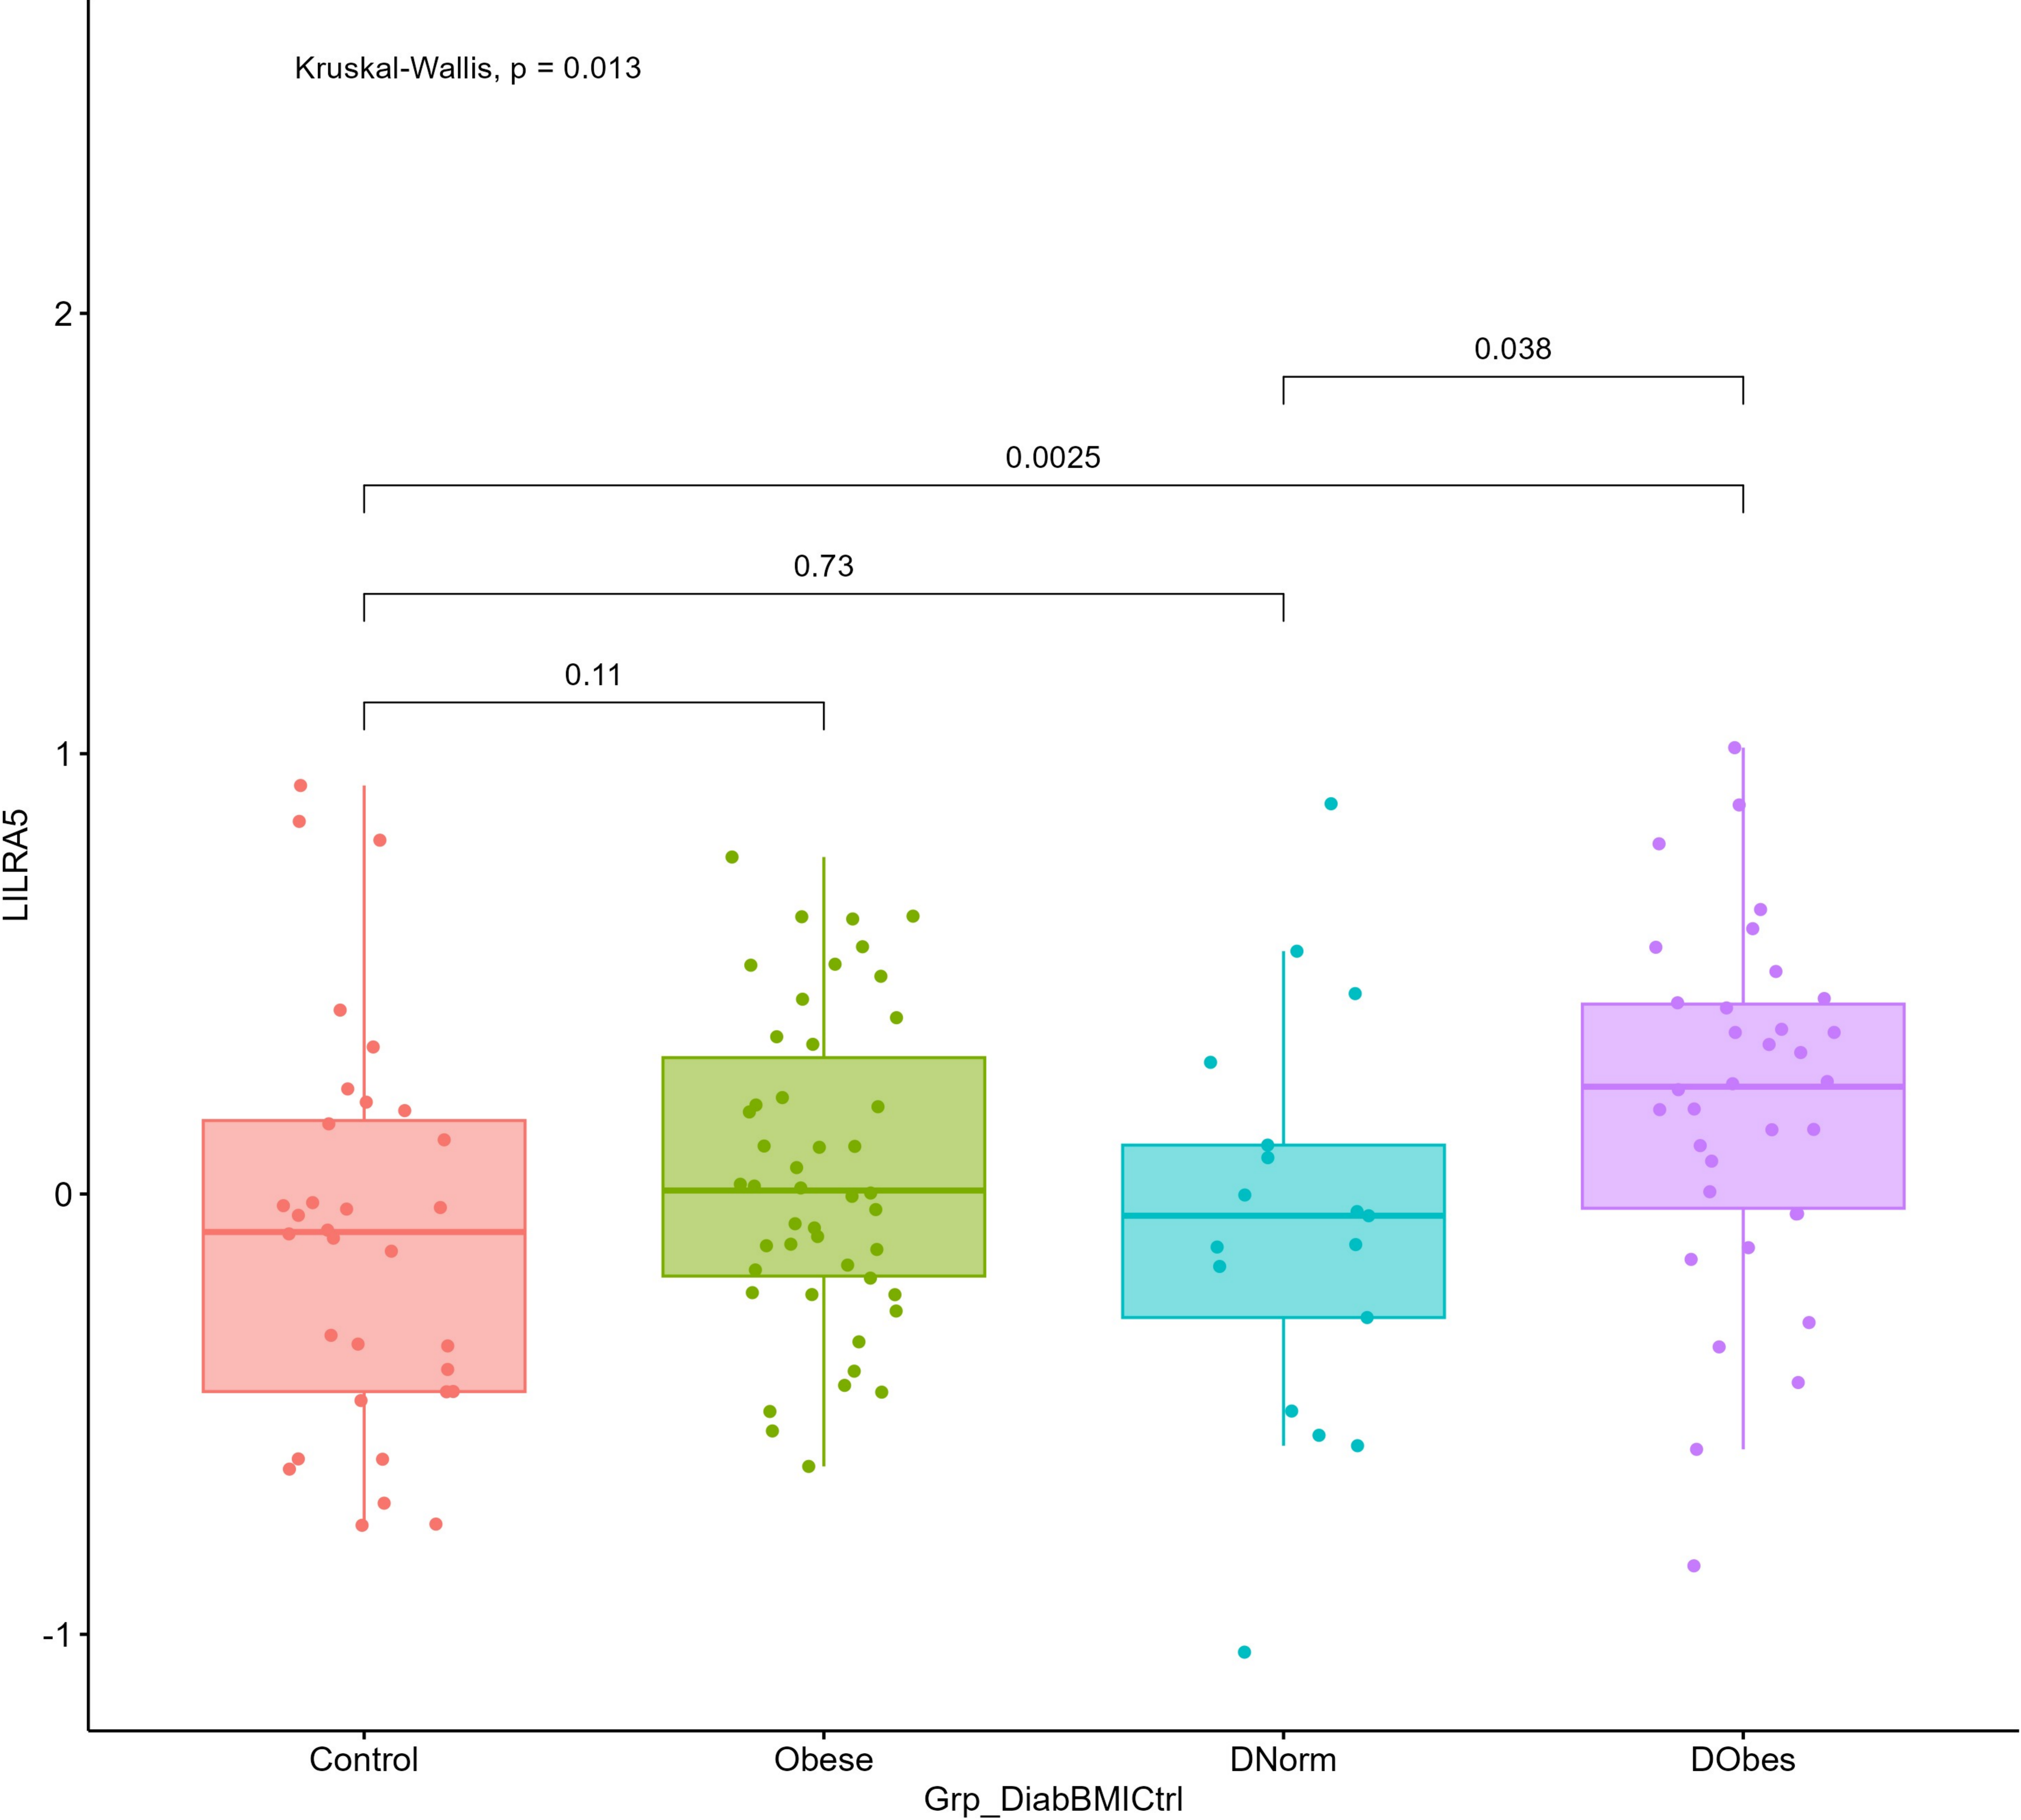

# Grp\_DiabBMICtrl

Grp\_DiabBMICtrl Control Obese DNorm DObes

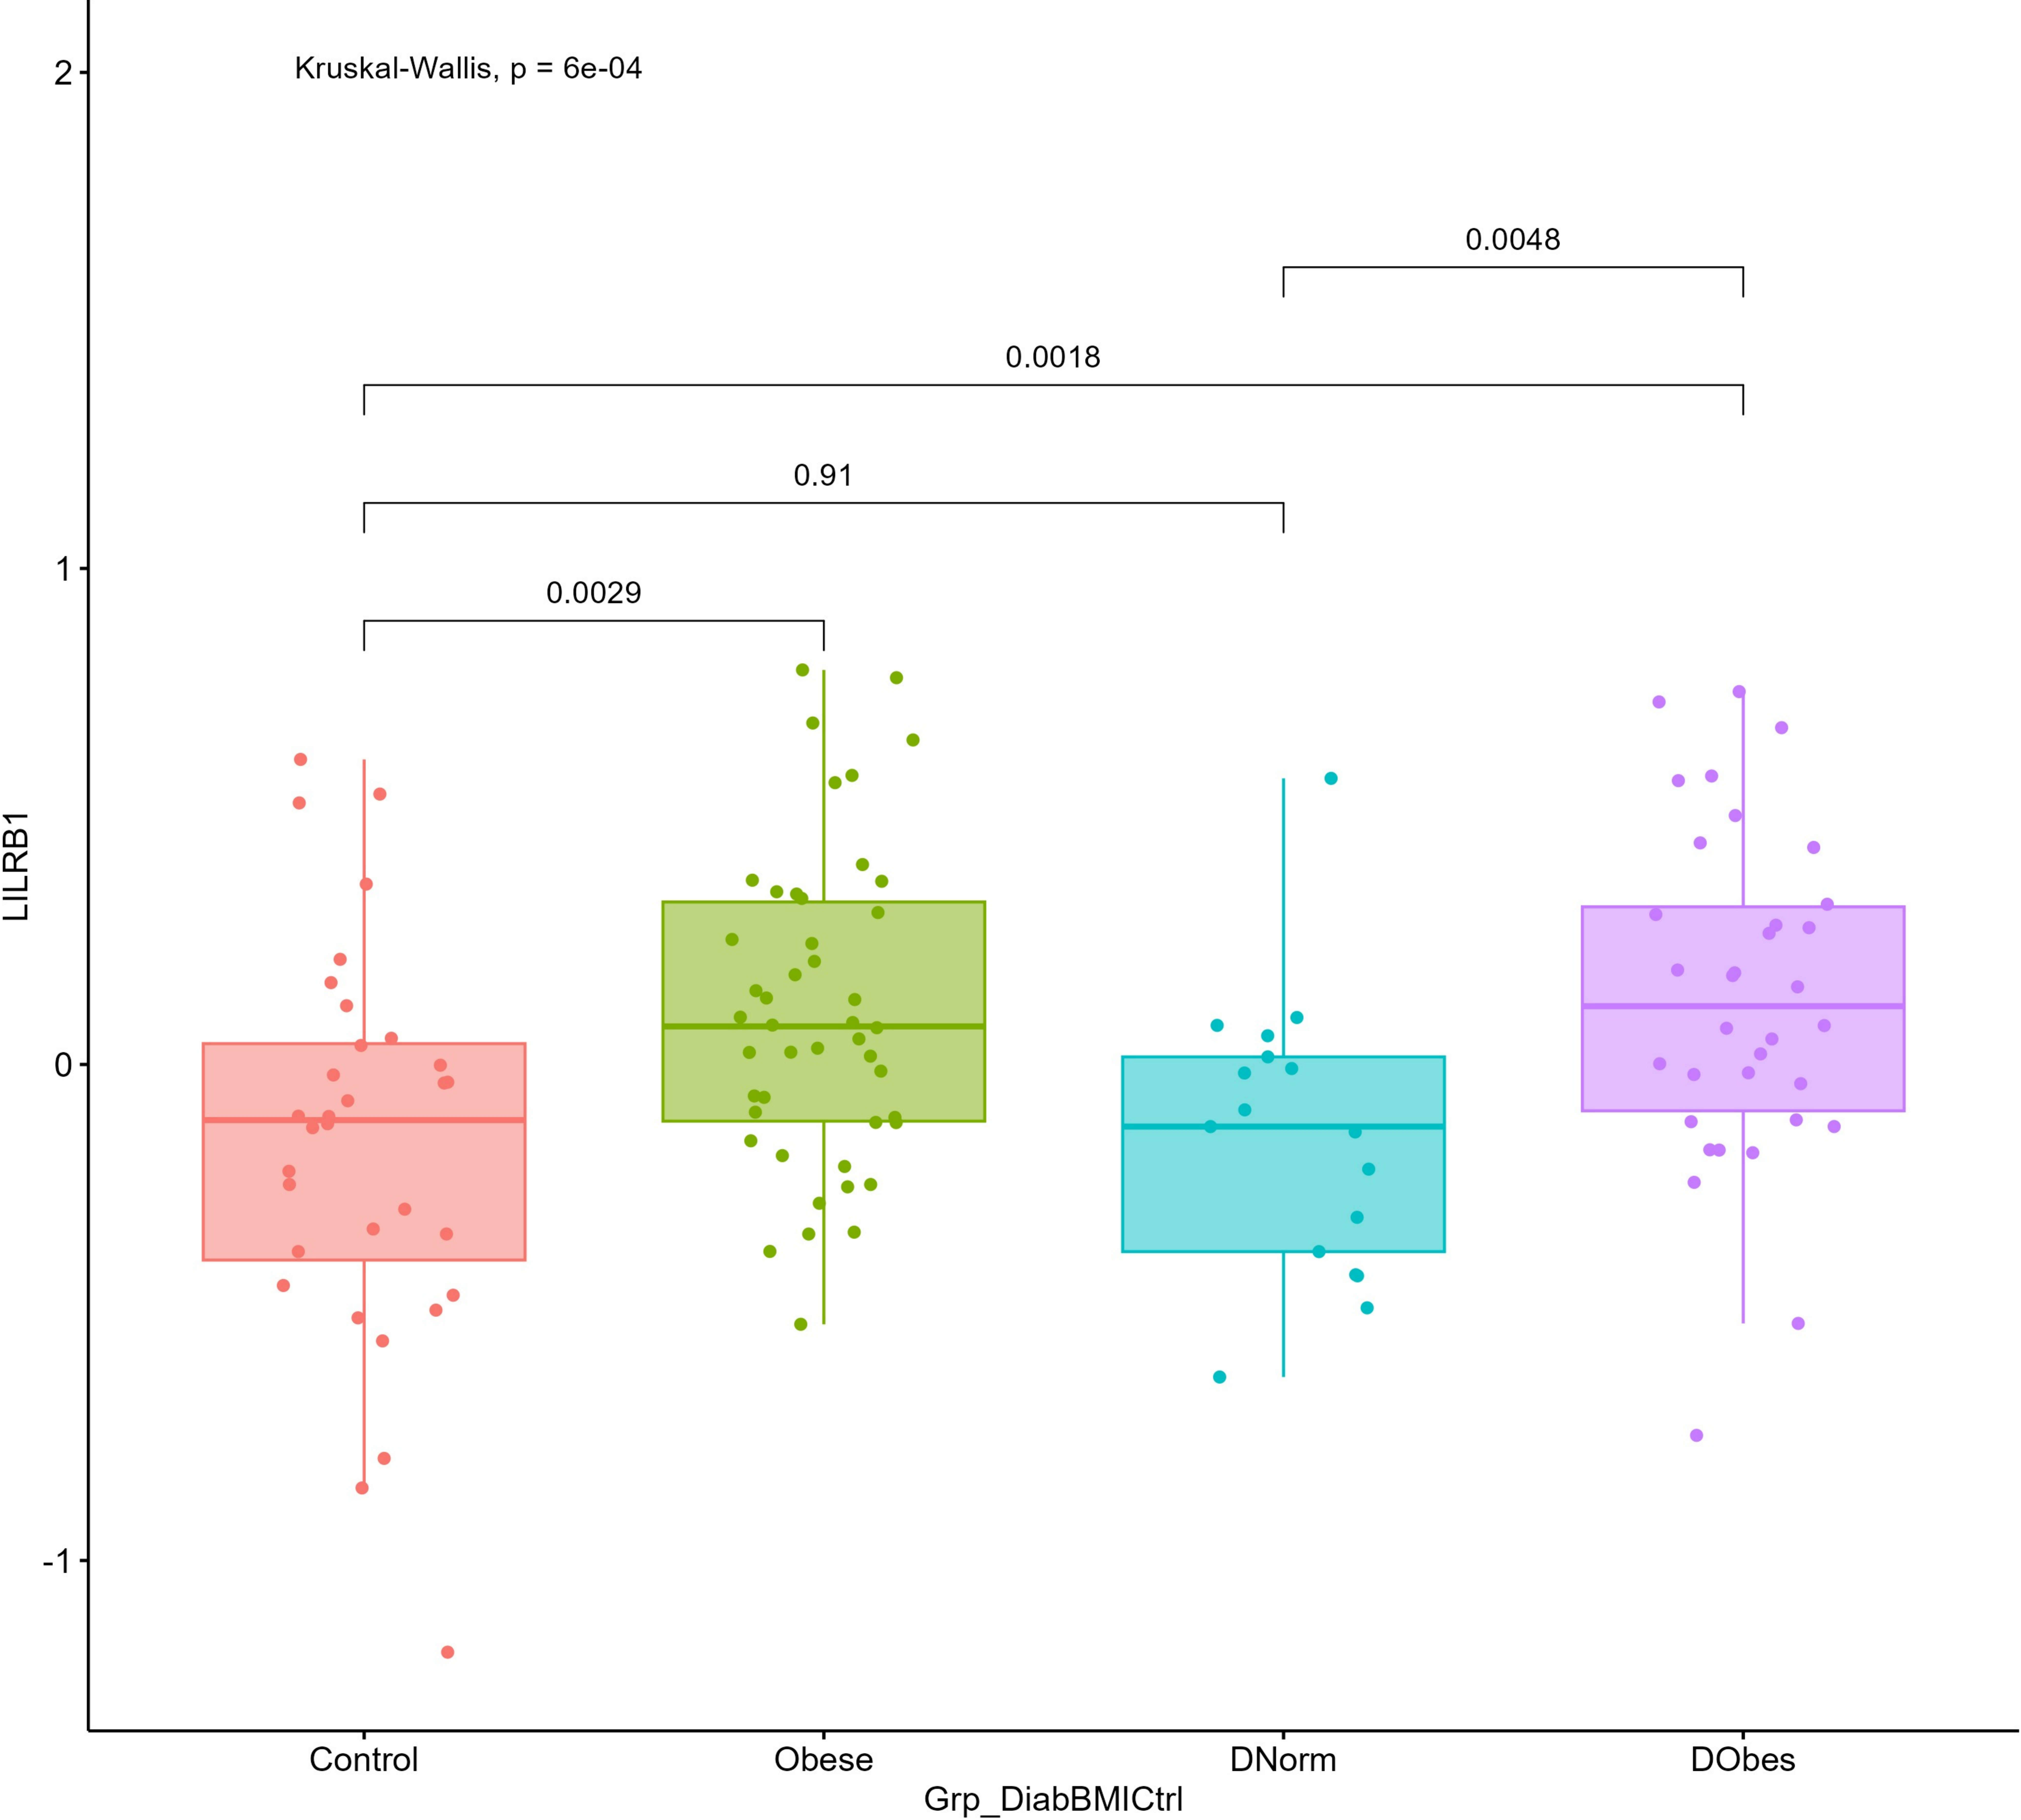

# Grp\_DiabBMICtrl

Grp\_DiabBMICtrl Control Obese DNorm DObes

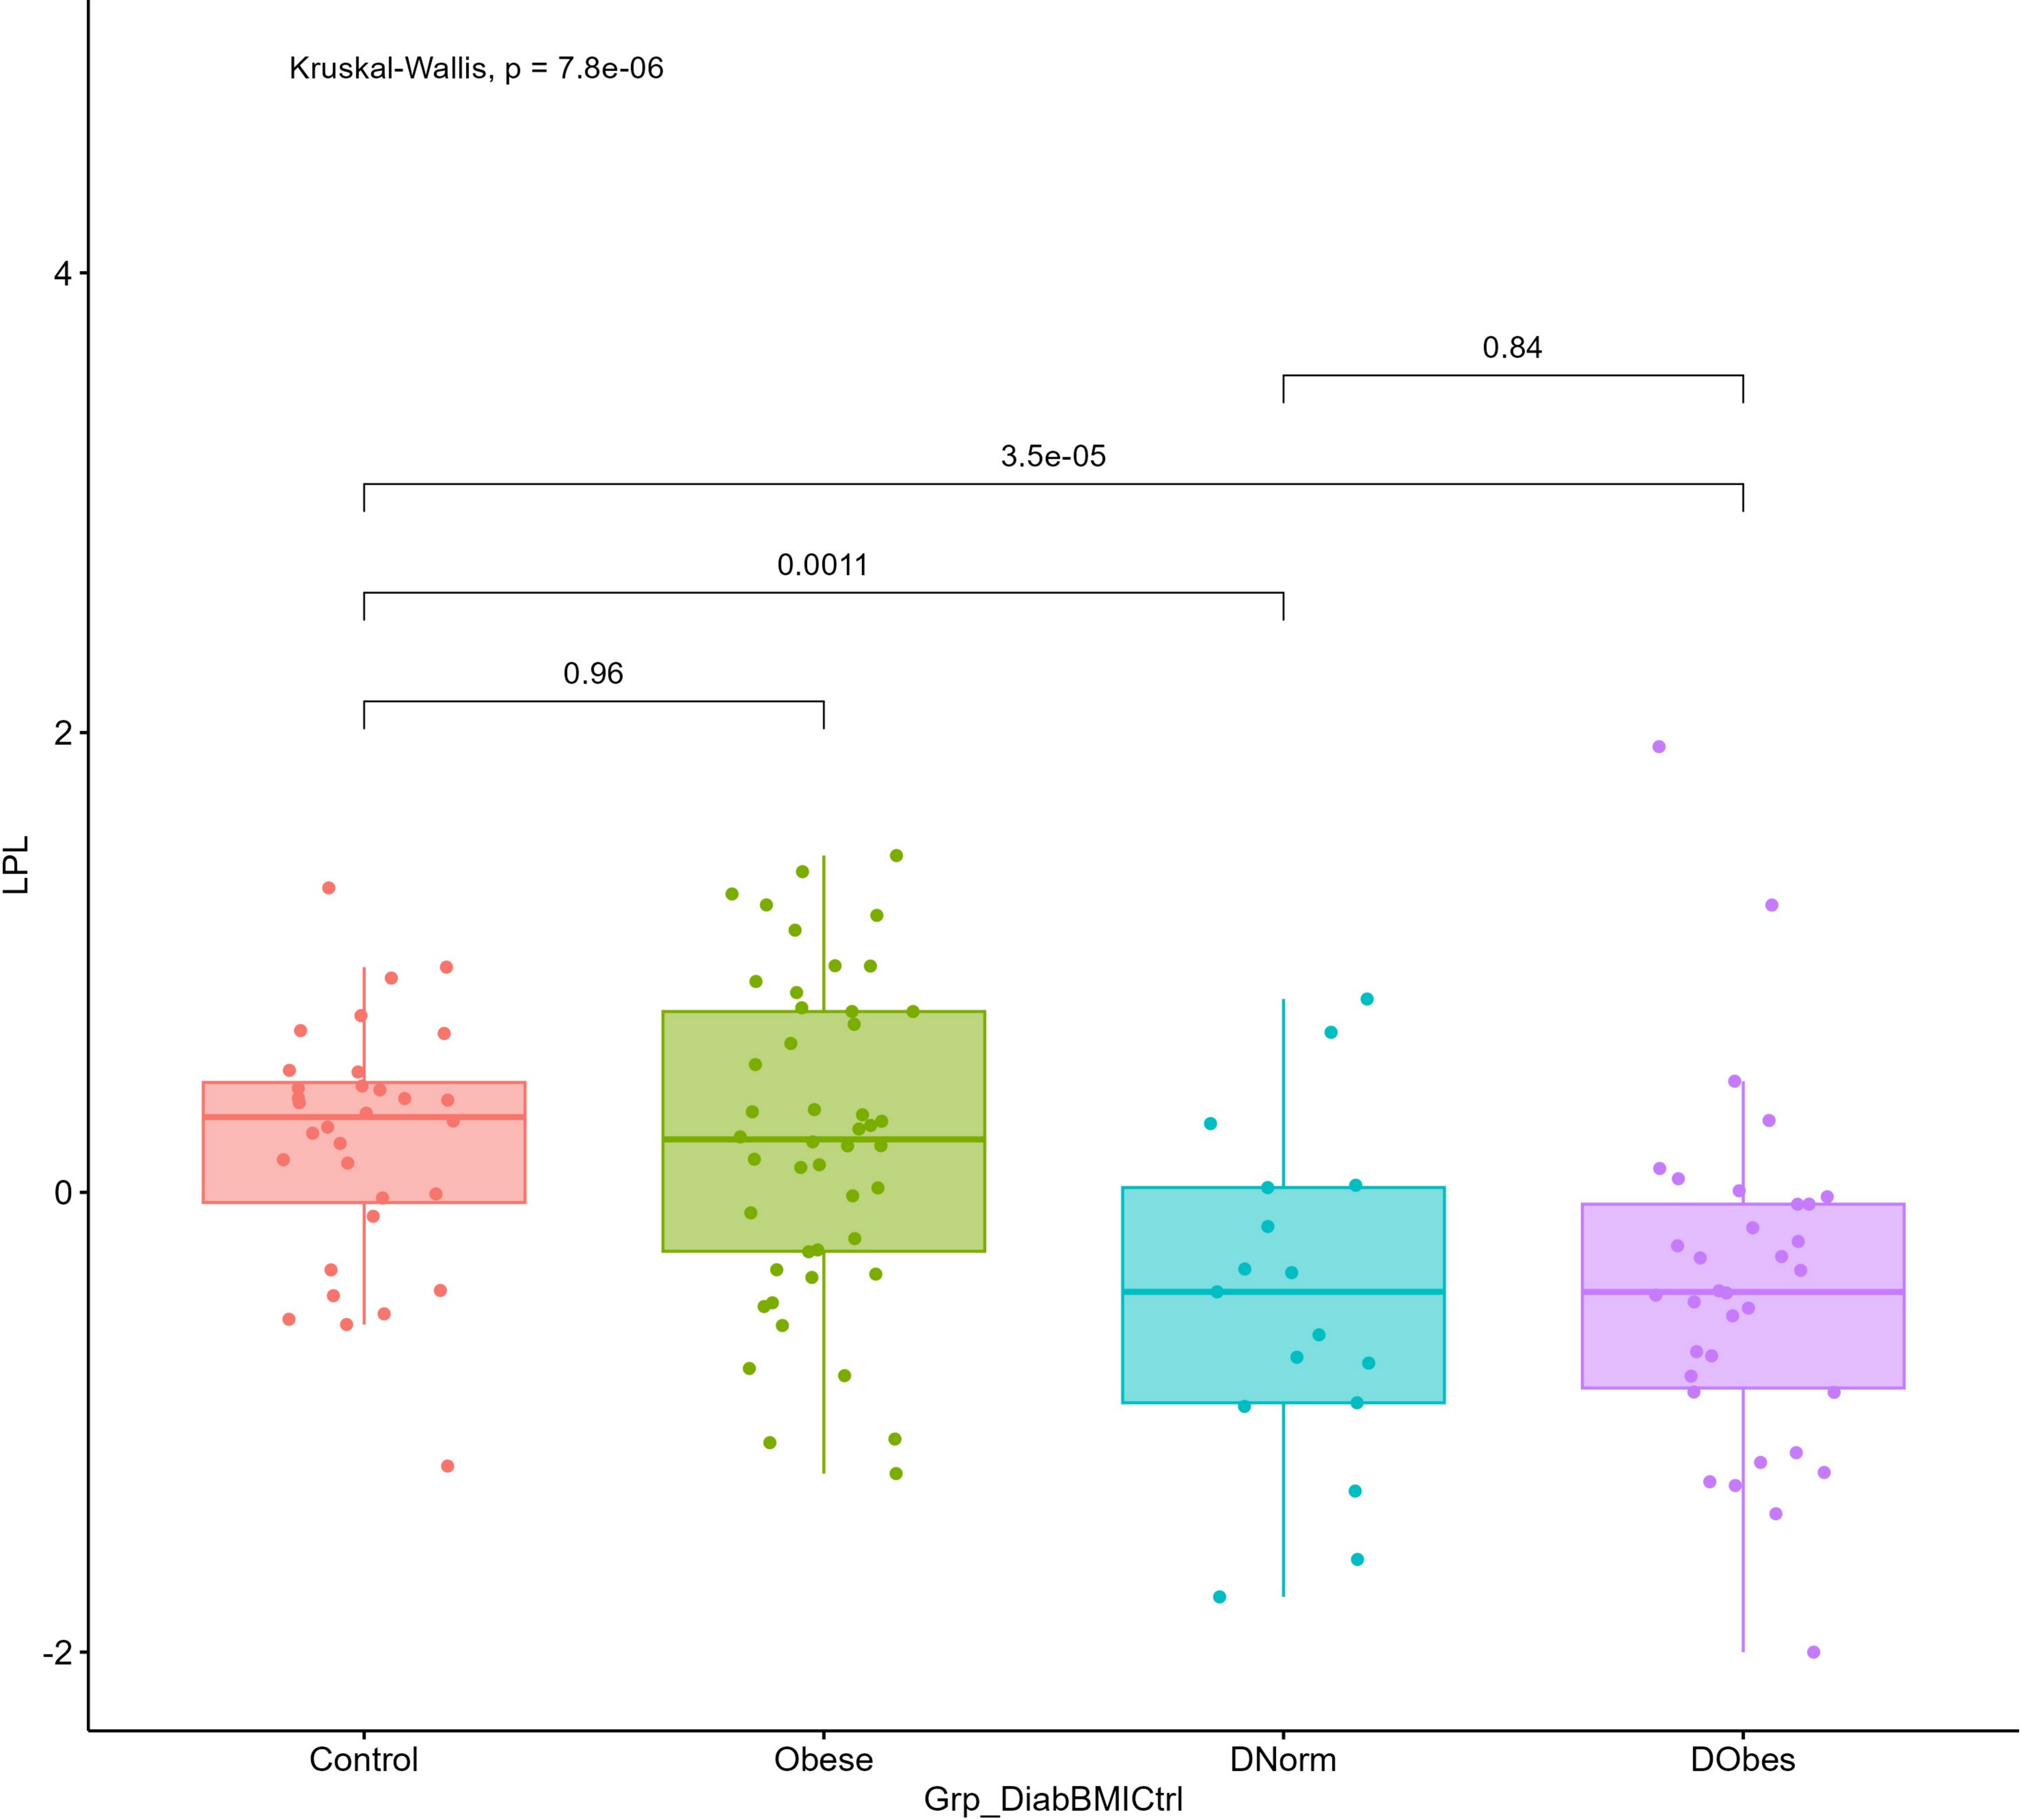

# Grp\_DiabBMICtrl

Grp\_DiabBMICtrl Control Obese DNorm DObes

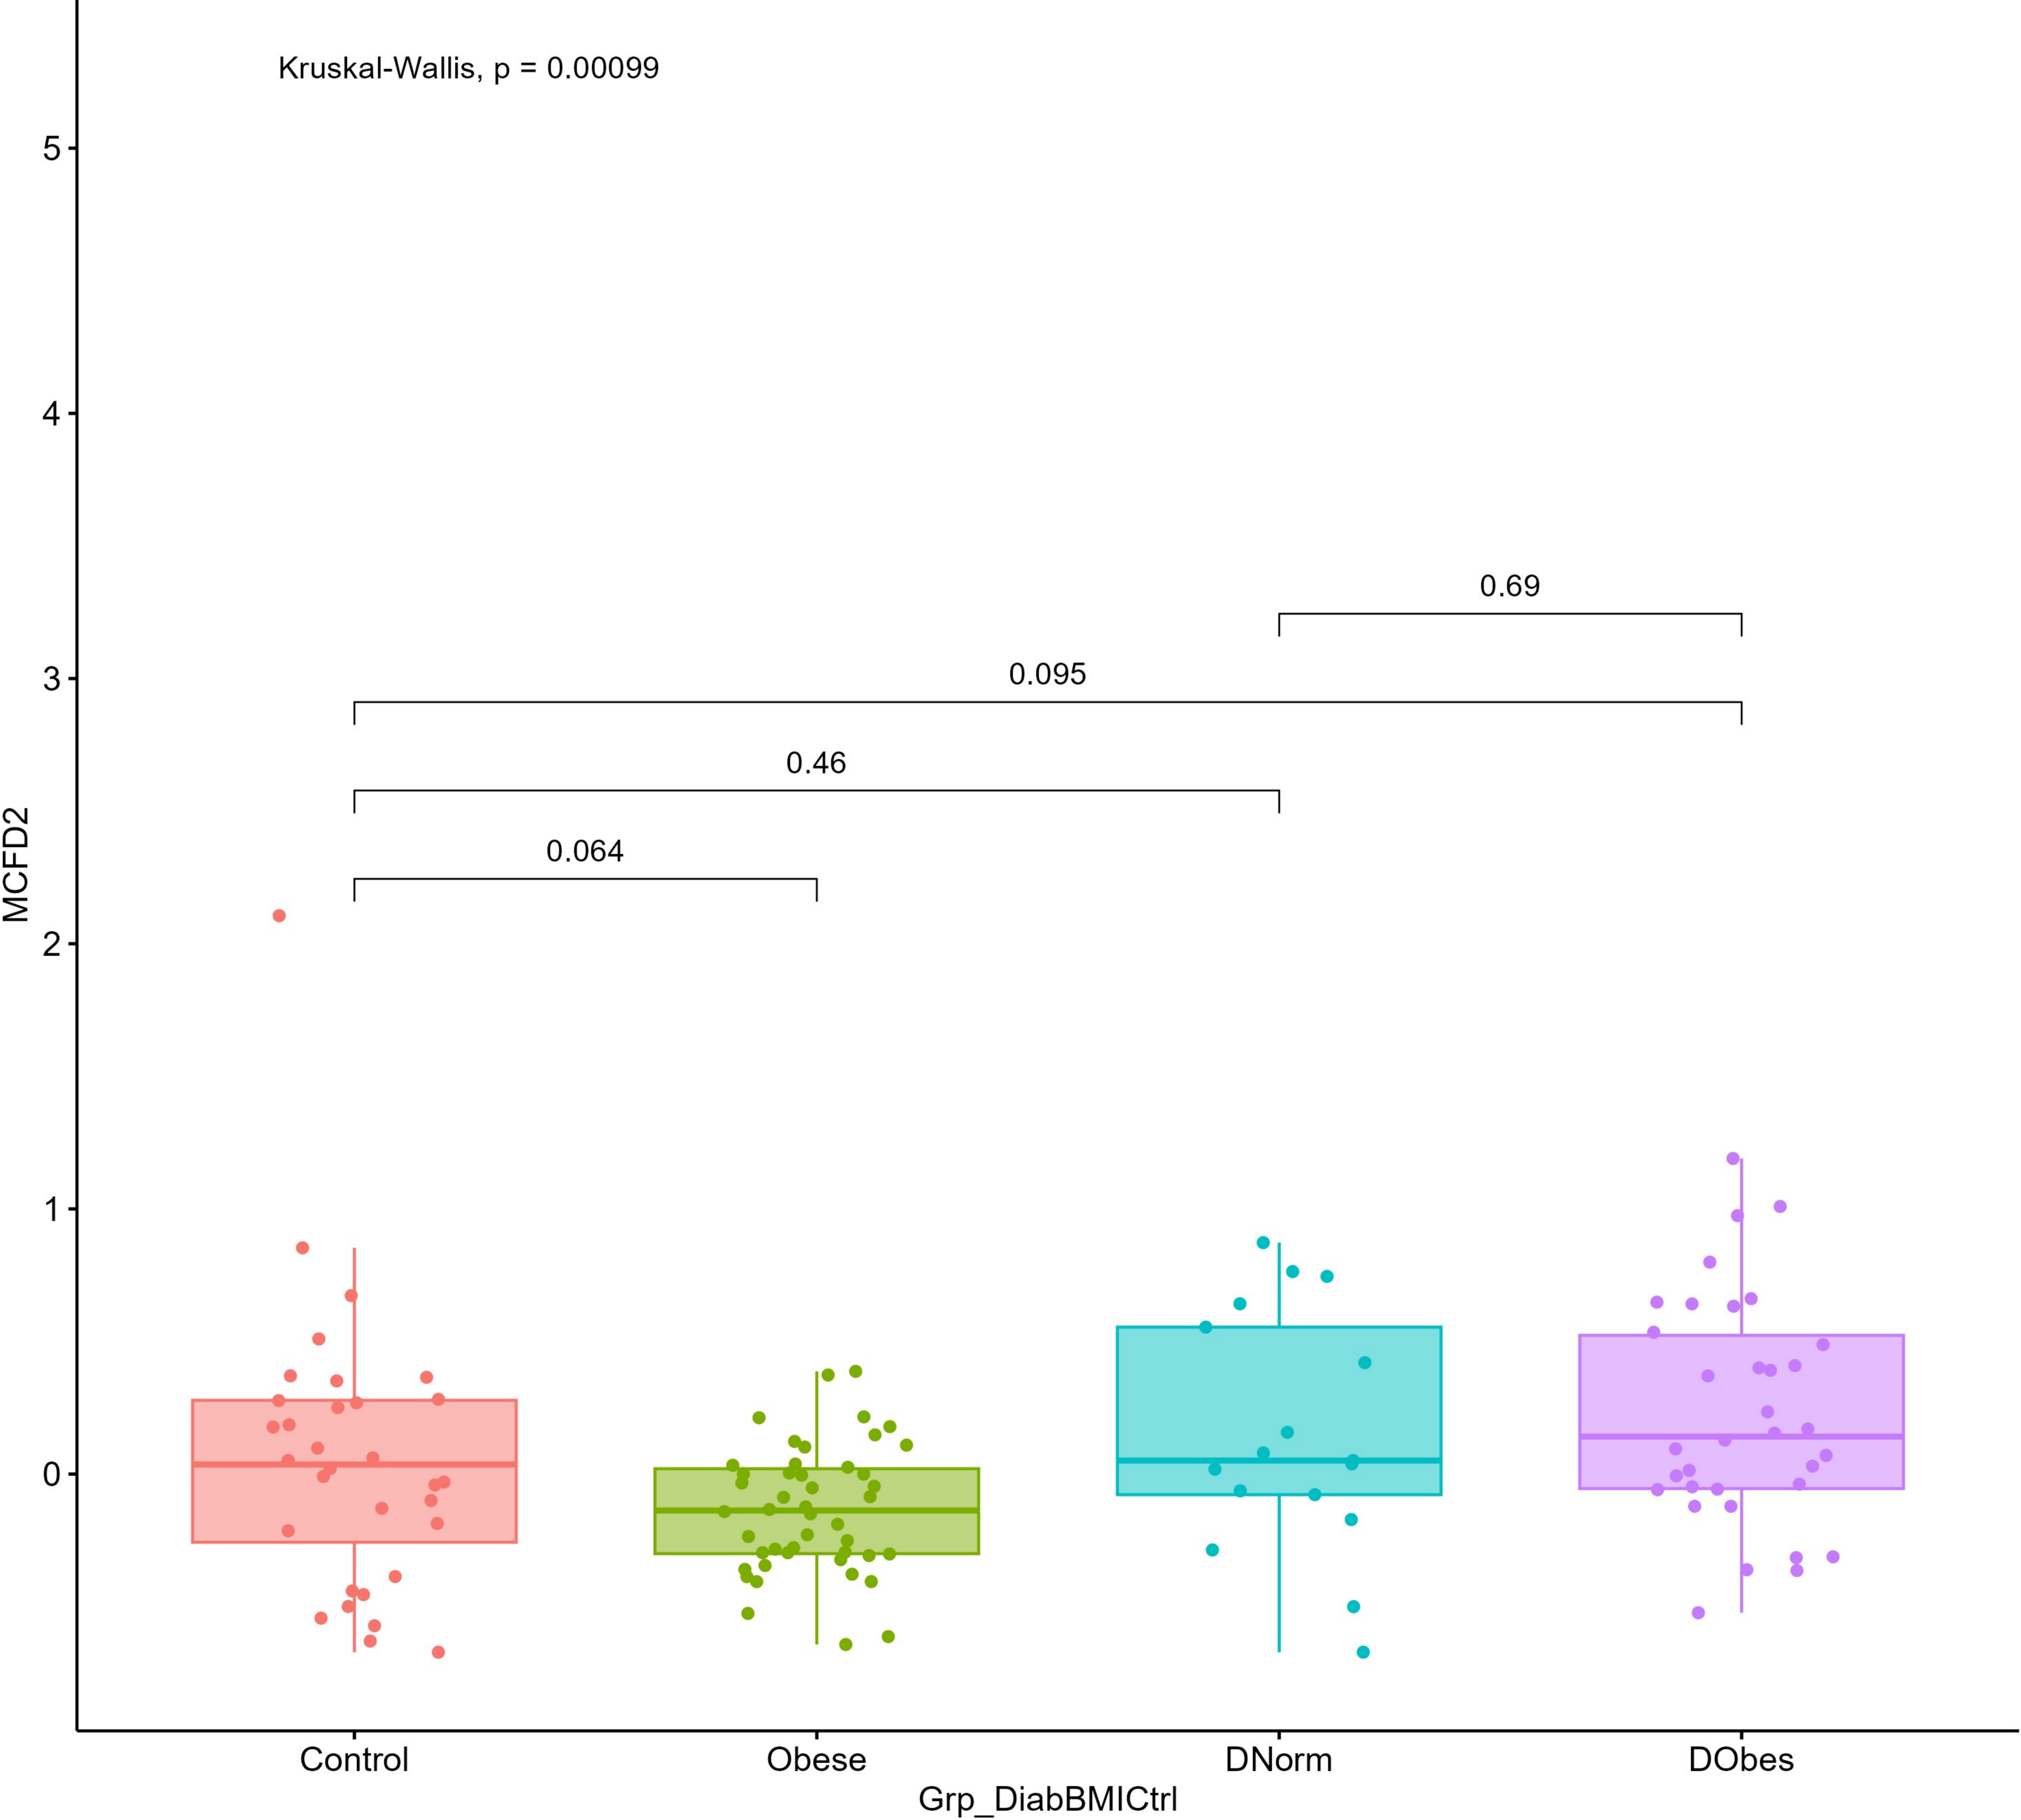

# Grp\_DiabBMICtrl

Grp\_DiabBMICtrl Control Obese DNorm DObes

Kruskal-Wallis, p = 0.00039

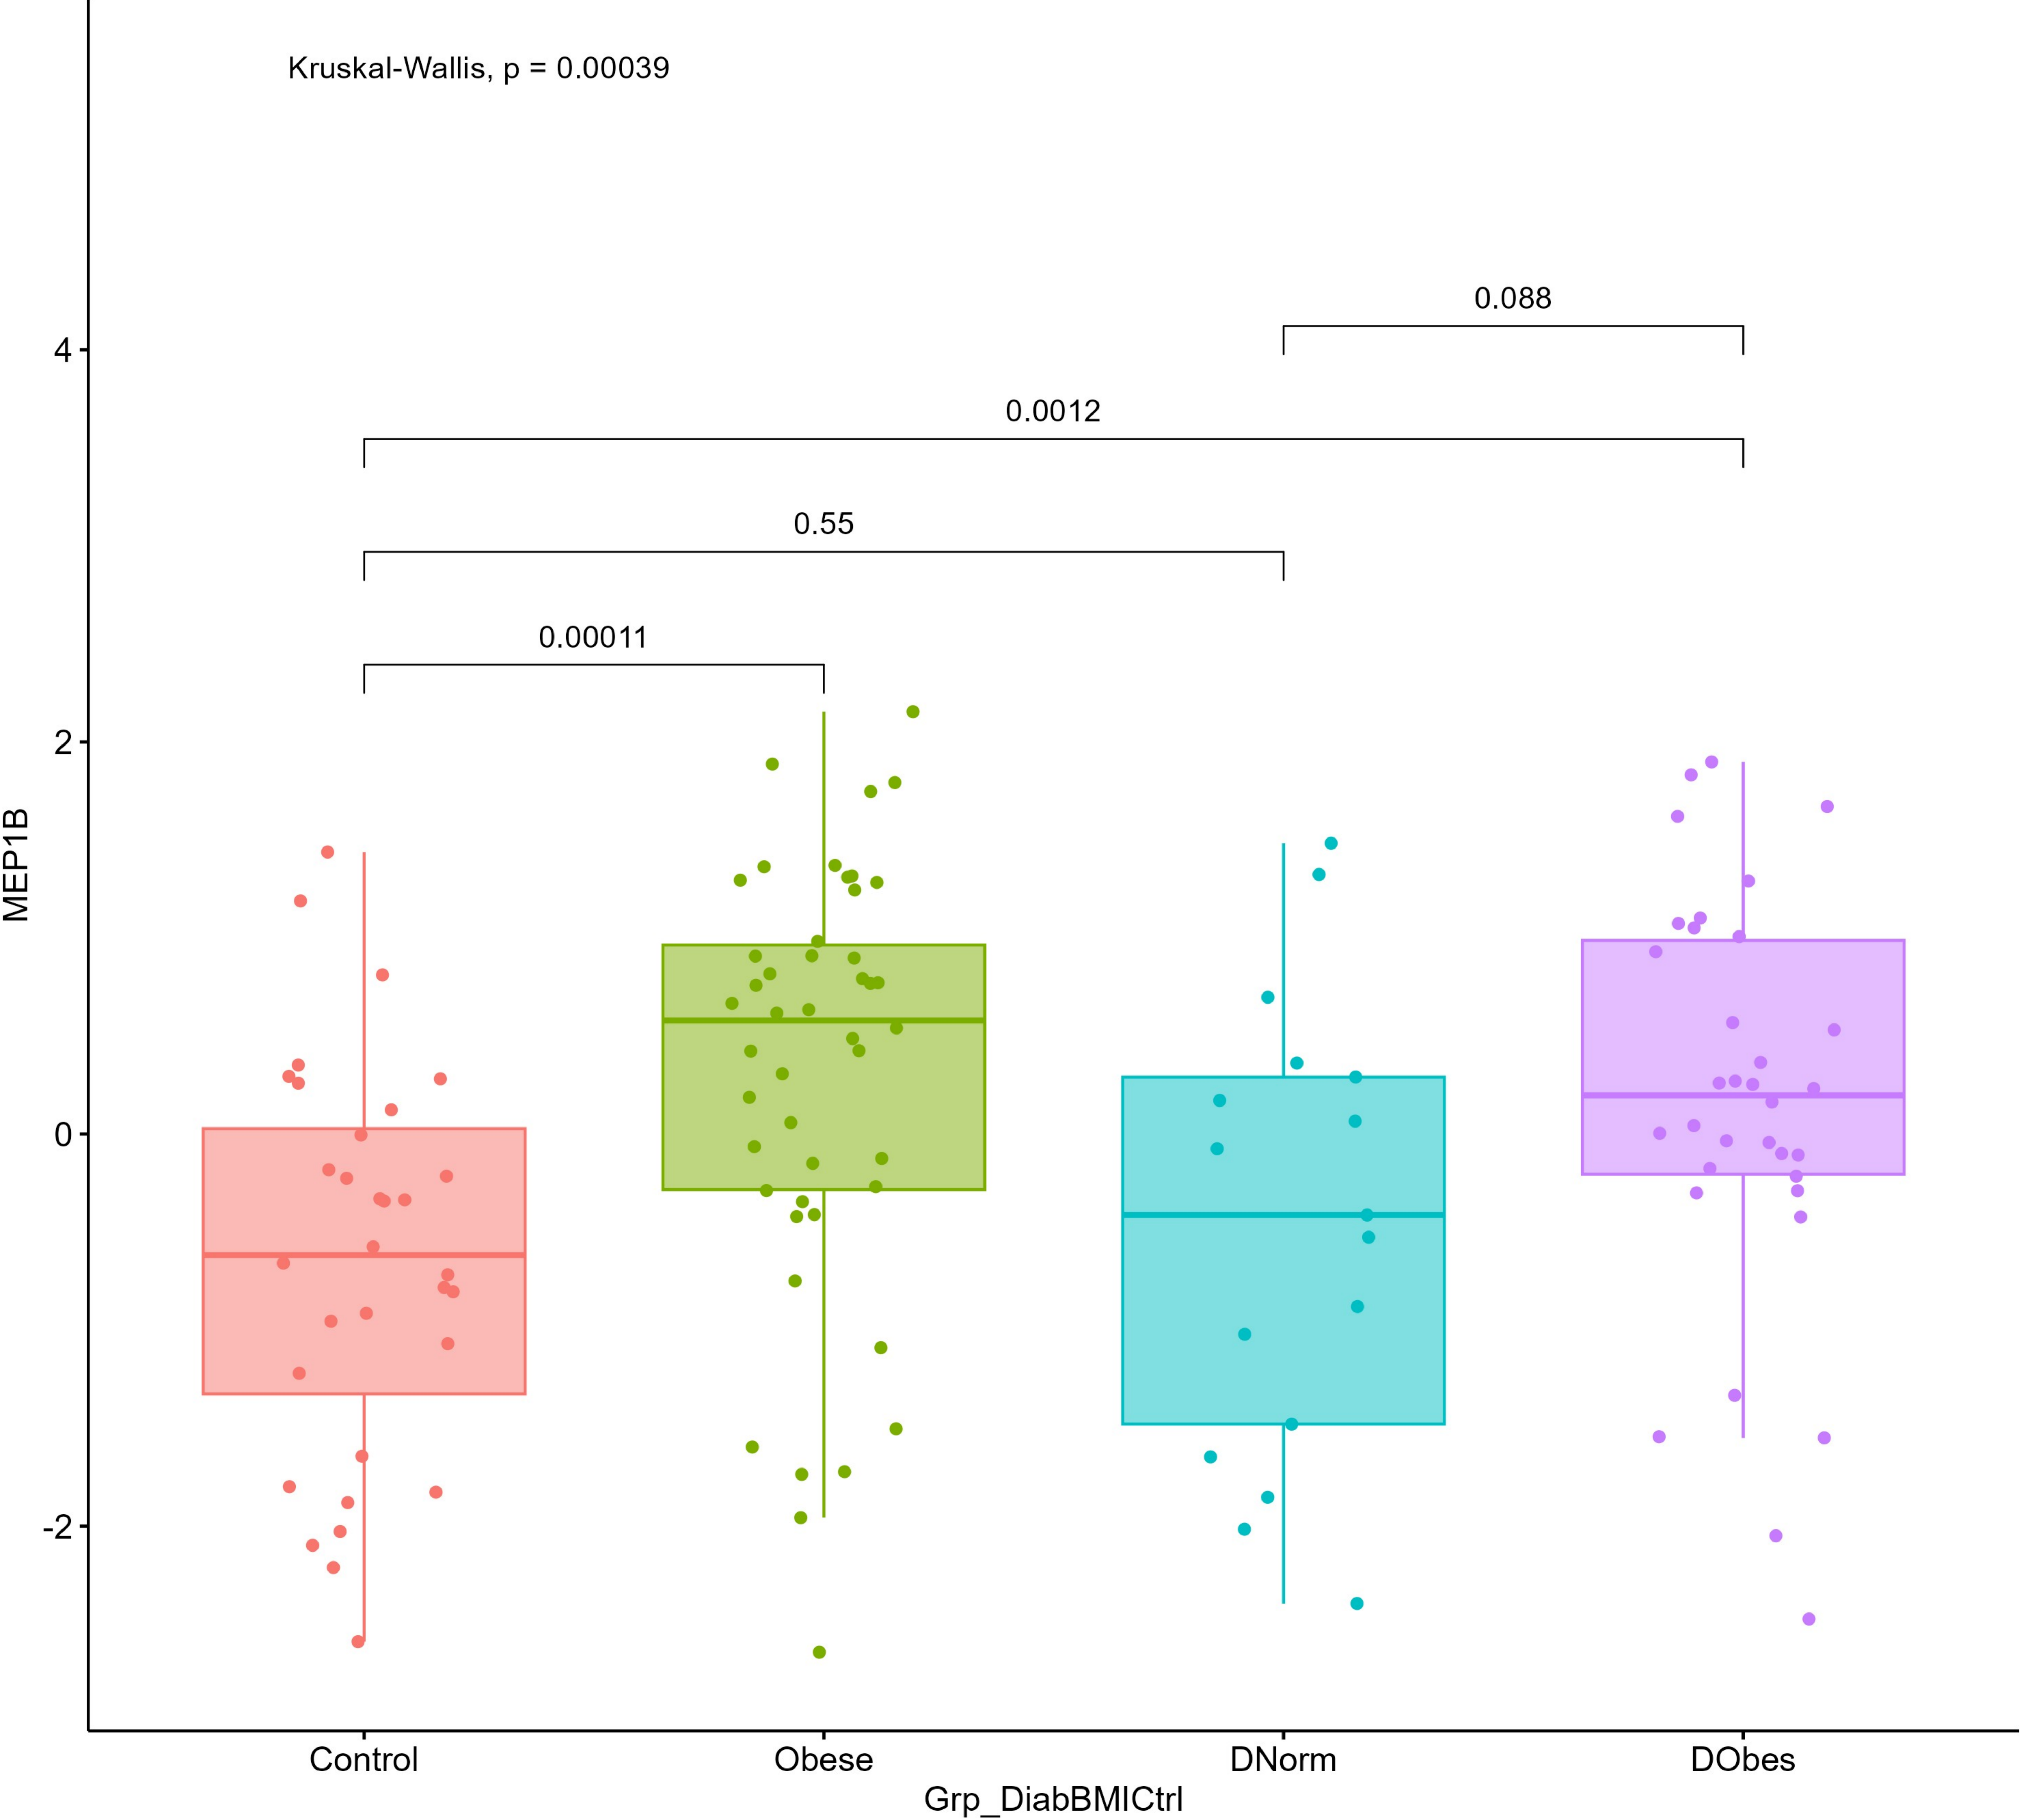

# Grp\_DiabBMICtrl

Grp\_DiabBMICtrl Control Obese DNorm DObes

Kruskal-Wallis, p = 0.0024

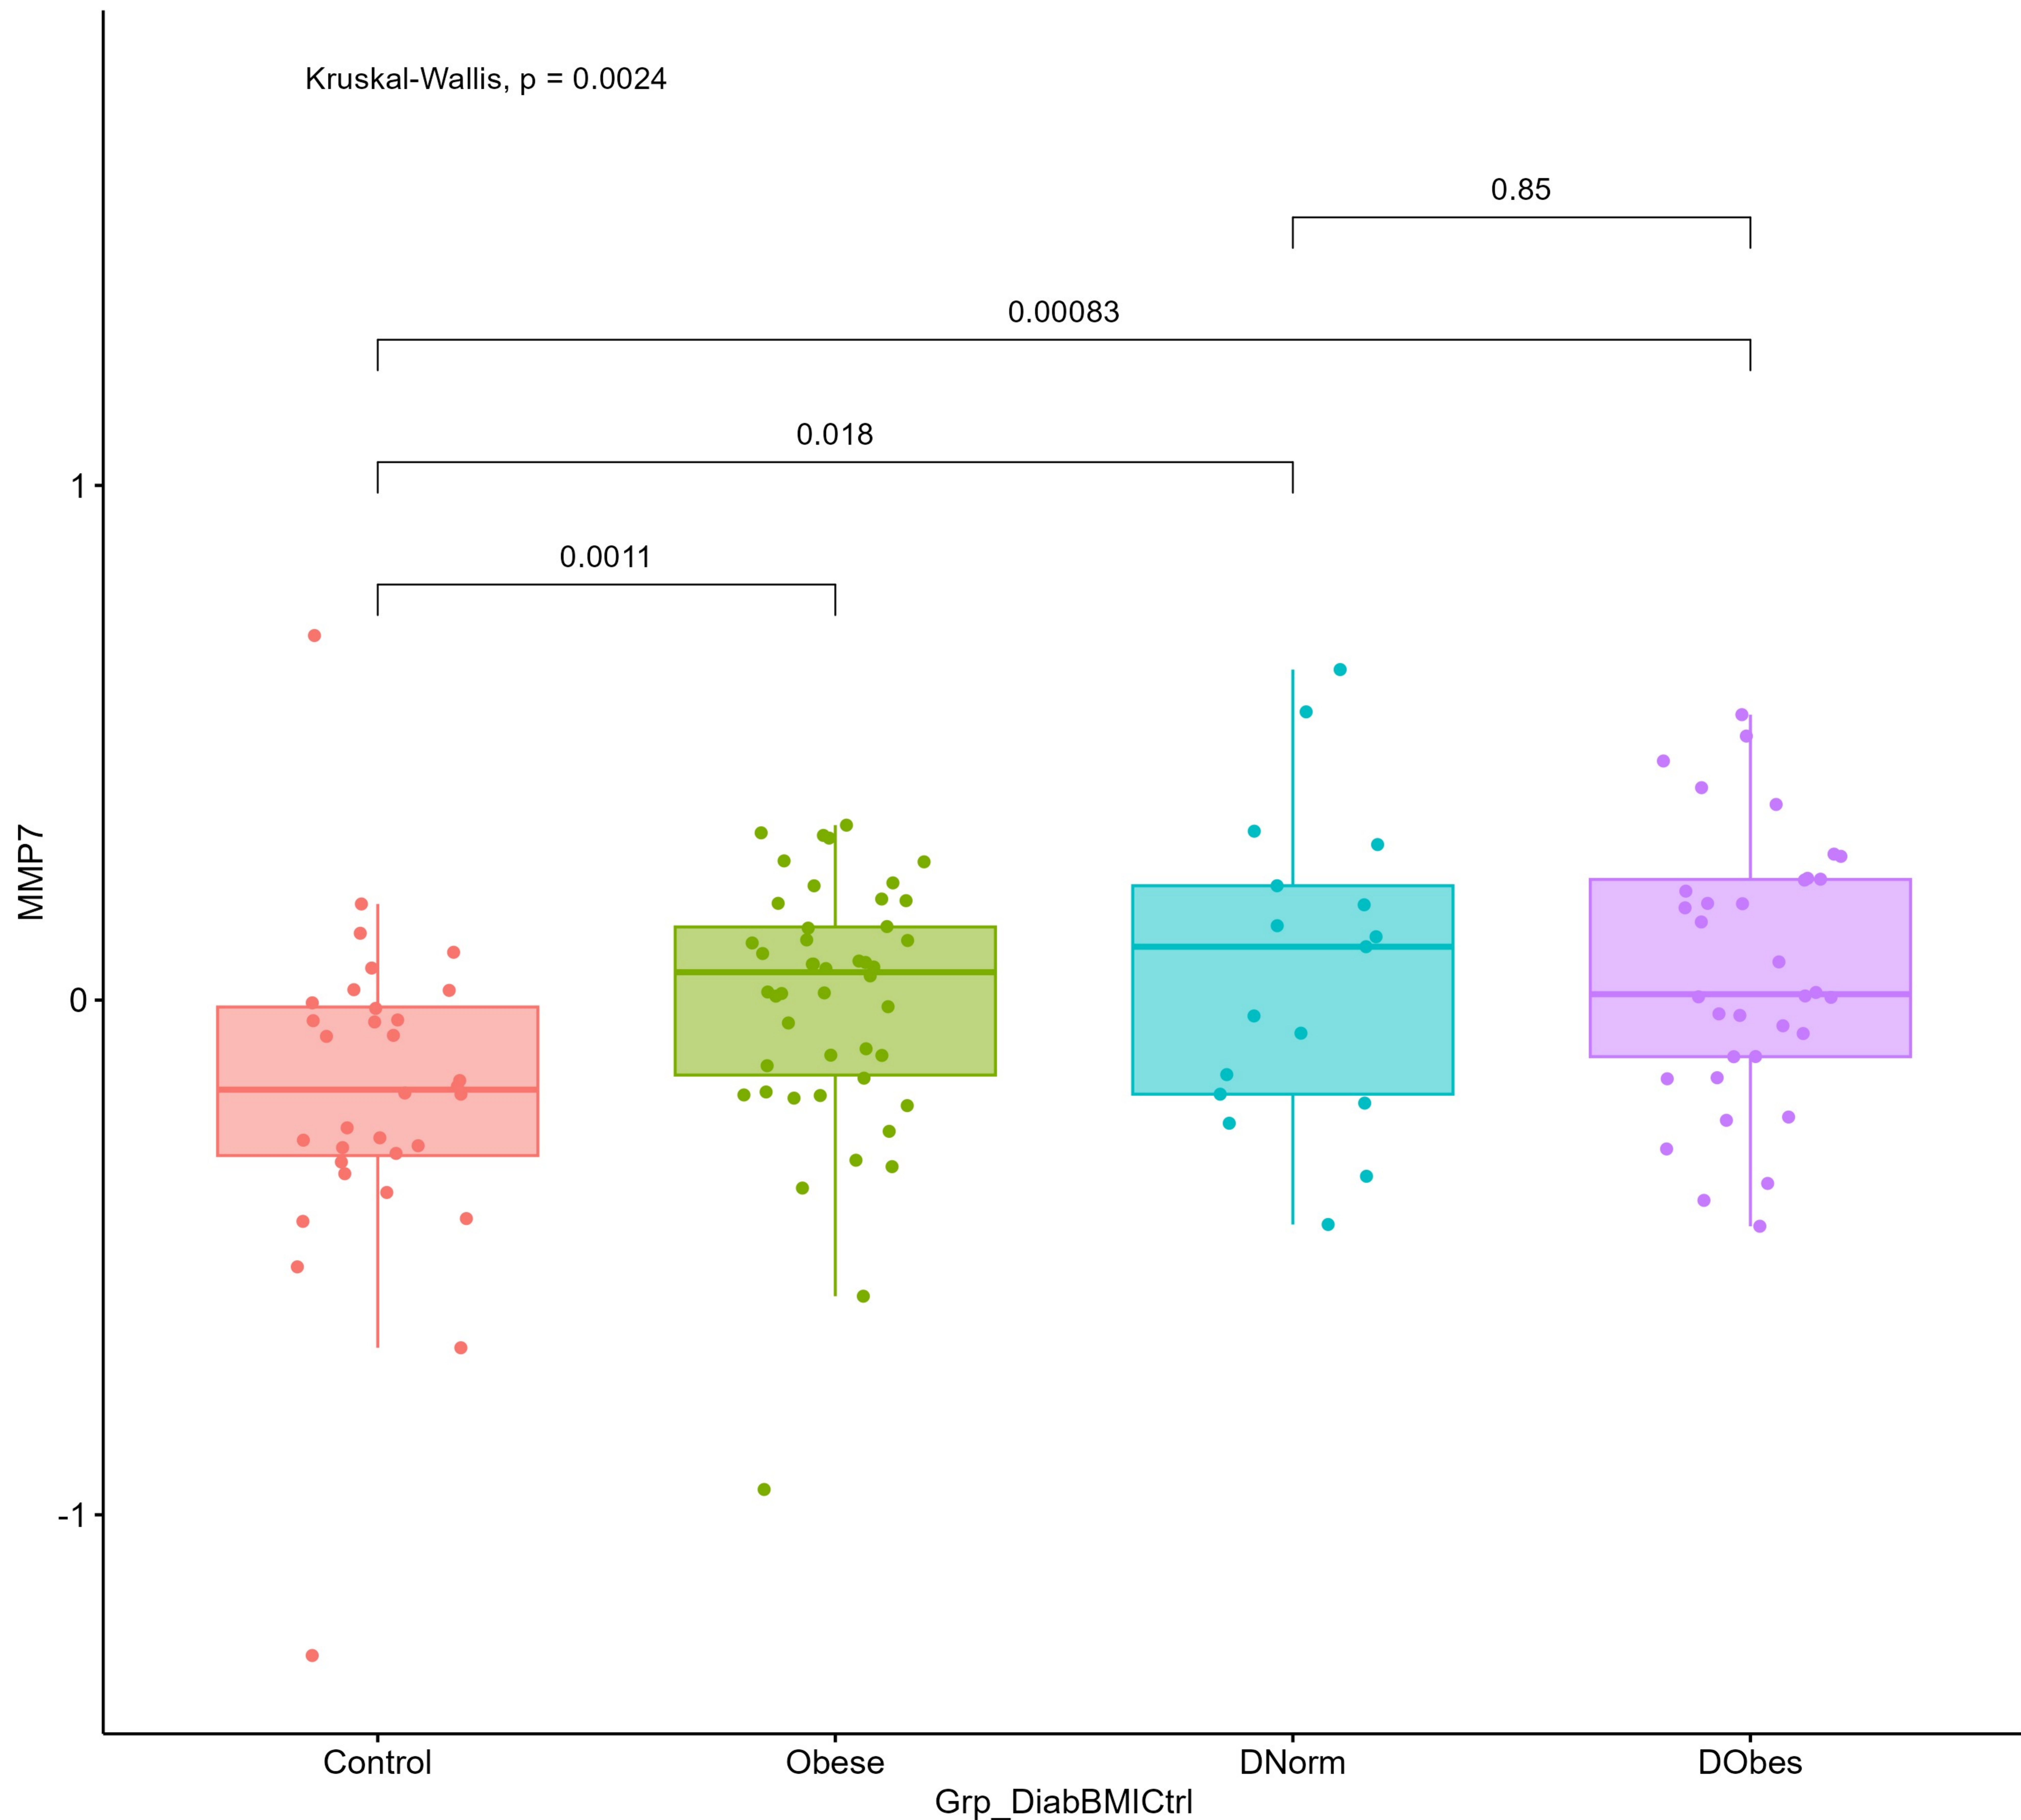

# Grp\_DiabBMICtrl

Grp\_DiabBMICtrl Control Obese DNorm DObes

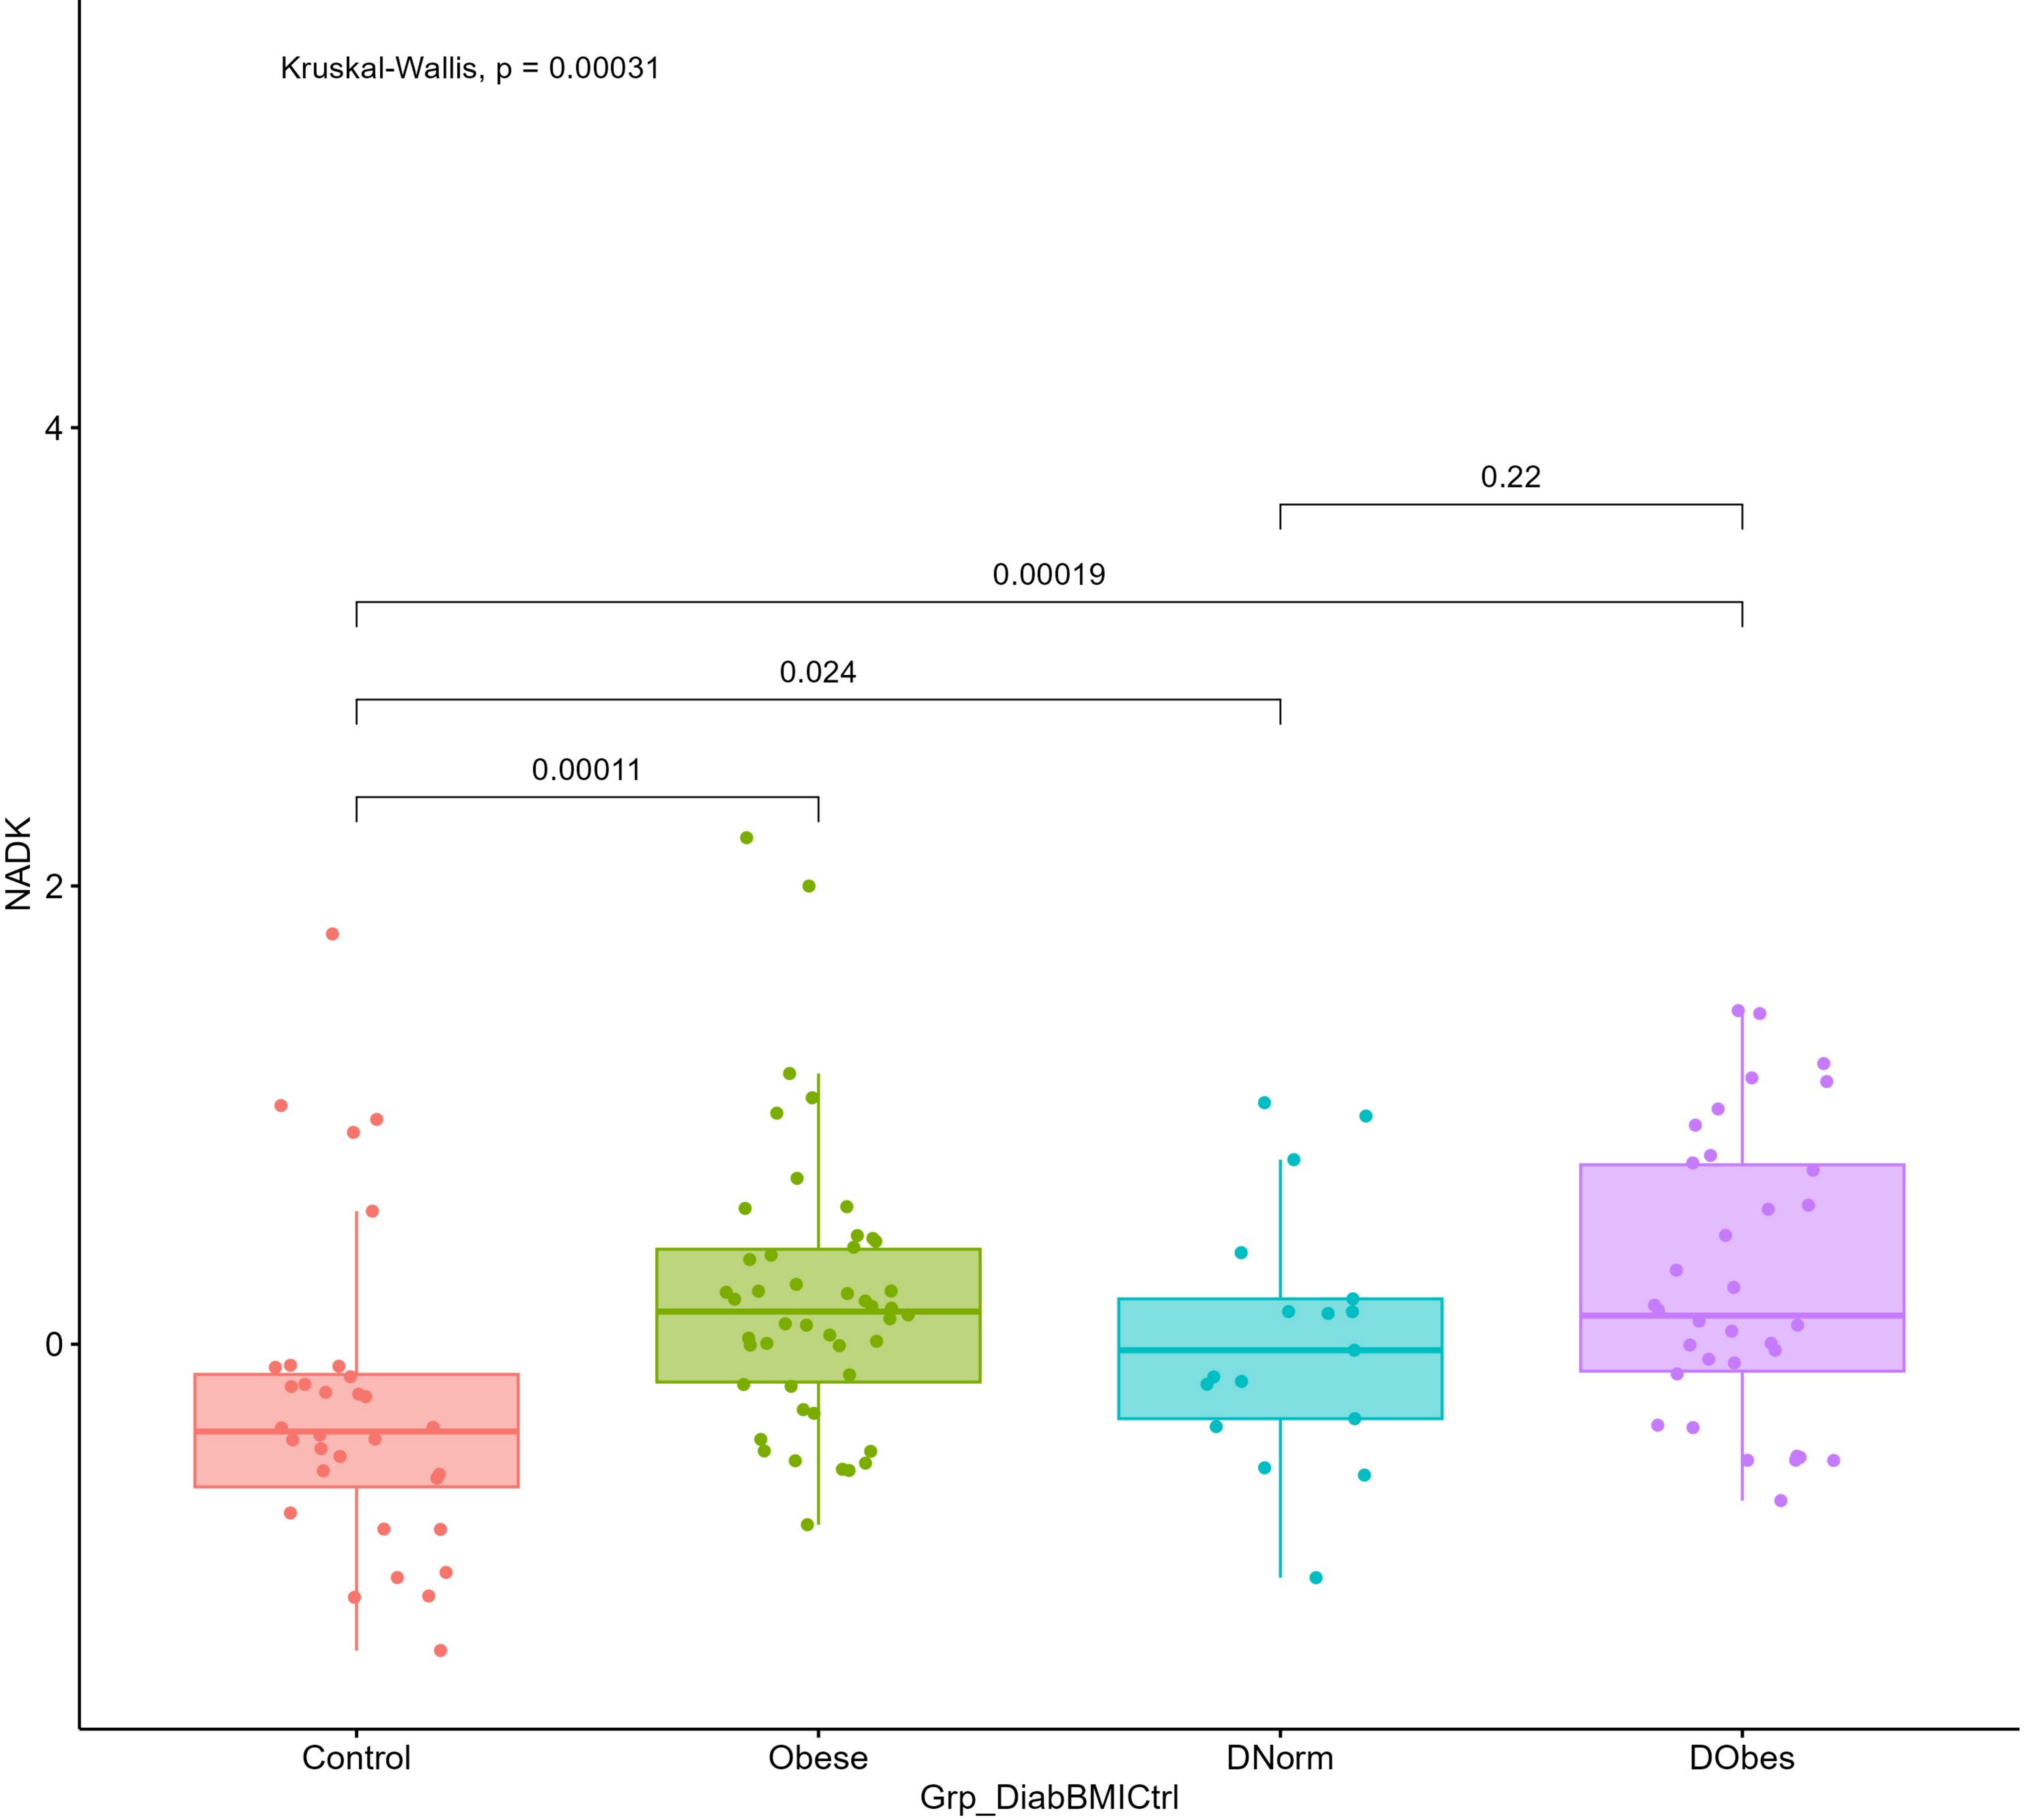

# Grp\_DiabBMICtrl

Grp\_DiabBMICtrl Control Obese DNorm DObes

Kruskal-Wallis, p = 0.0068

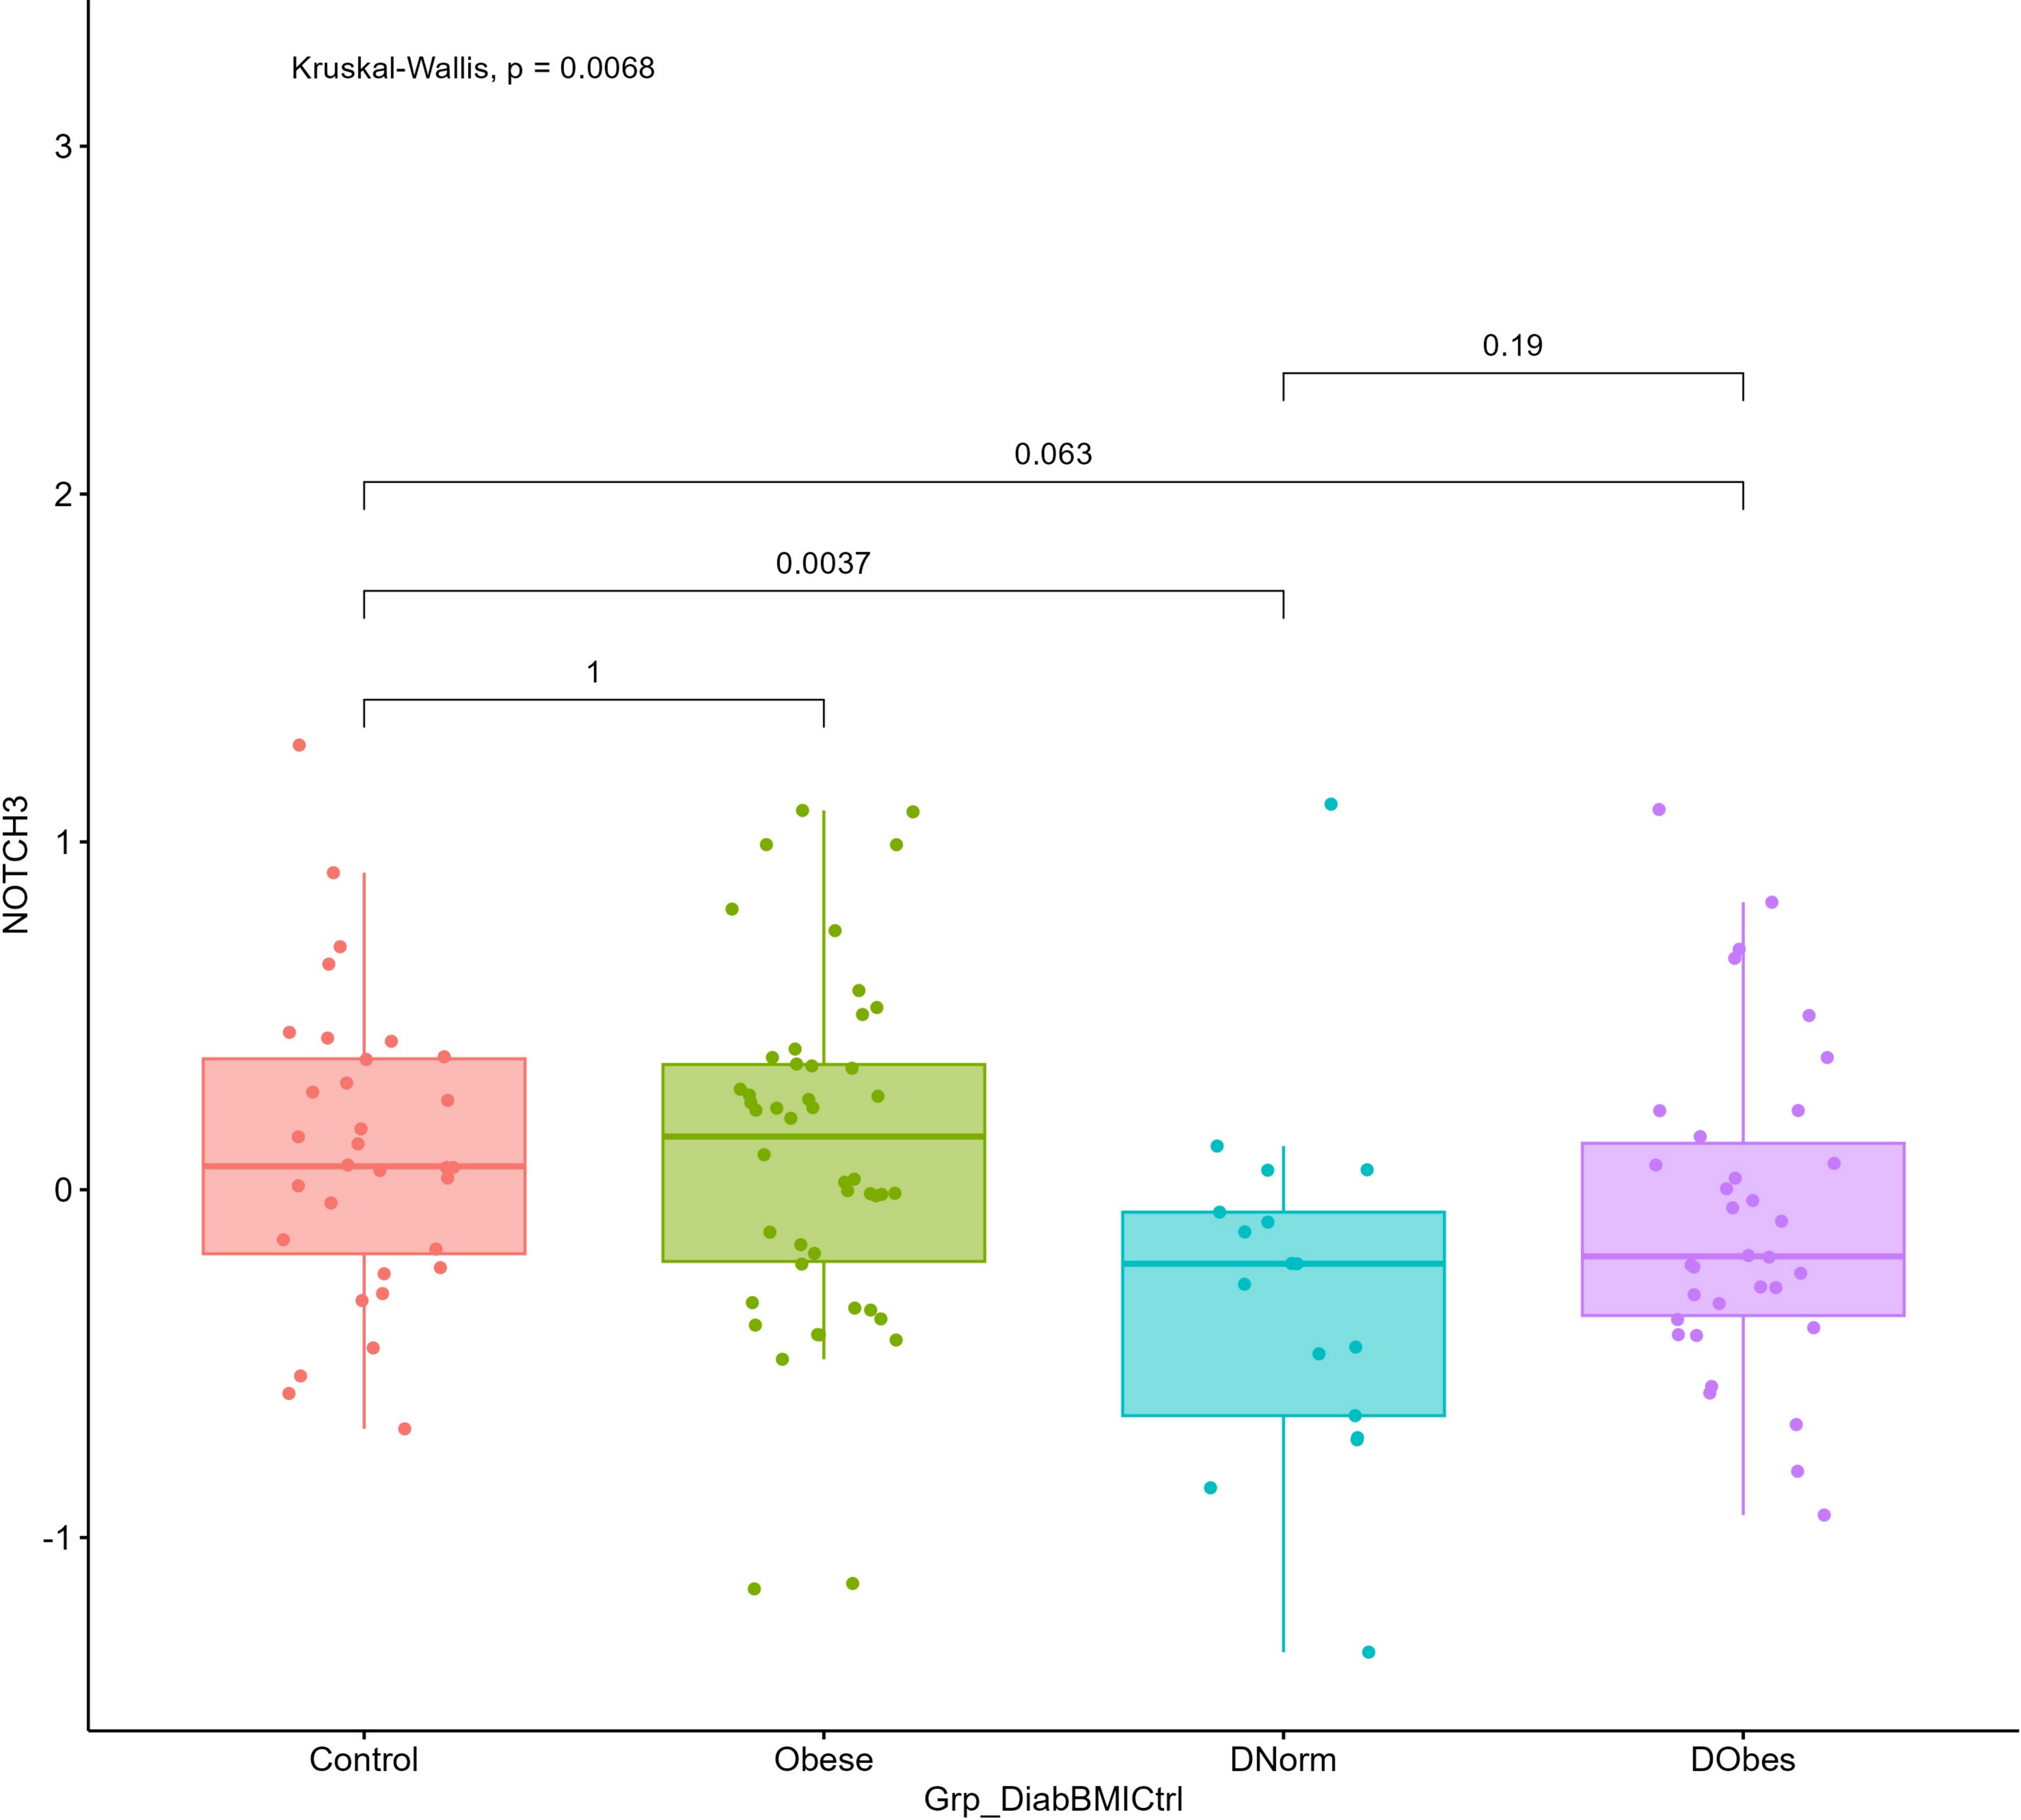

# Grp\_DiabBMICtrl

Grp\_DiabBMICtrl Control Obese DNorm DObes

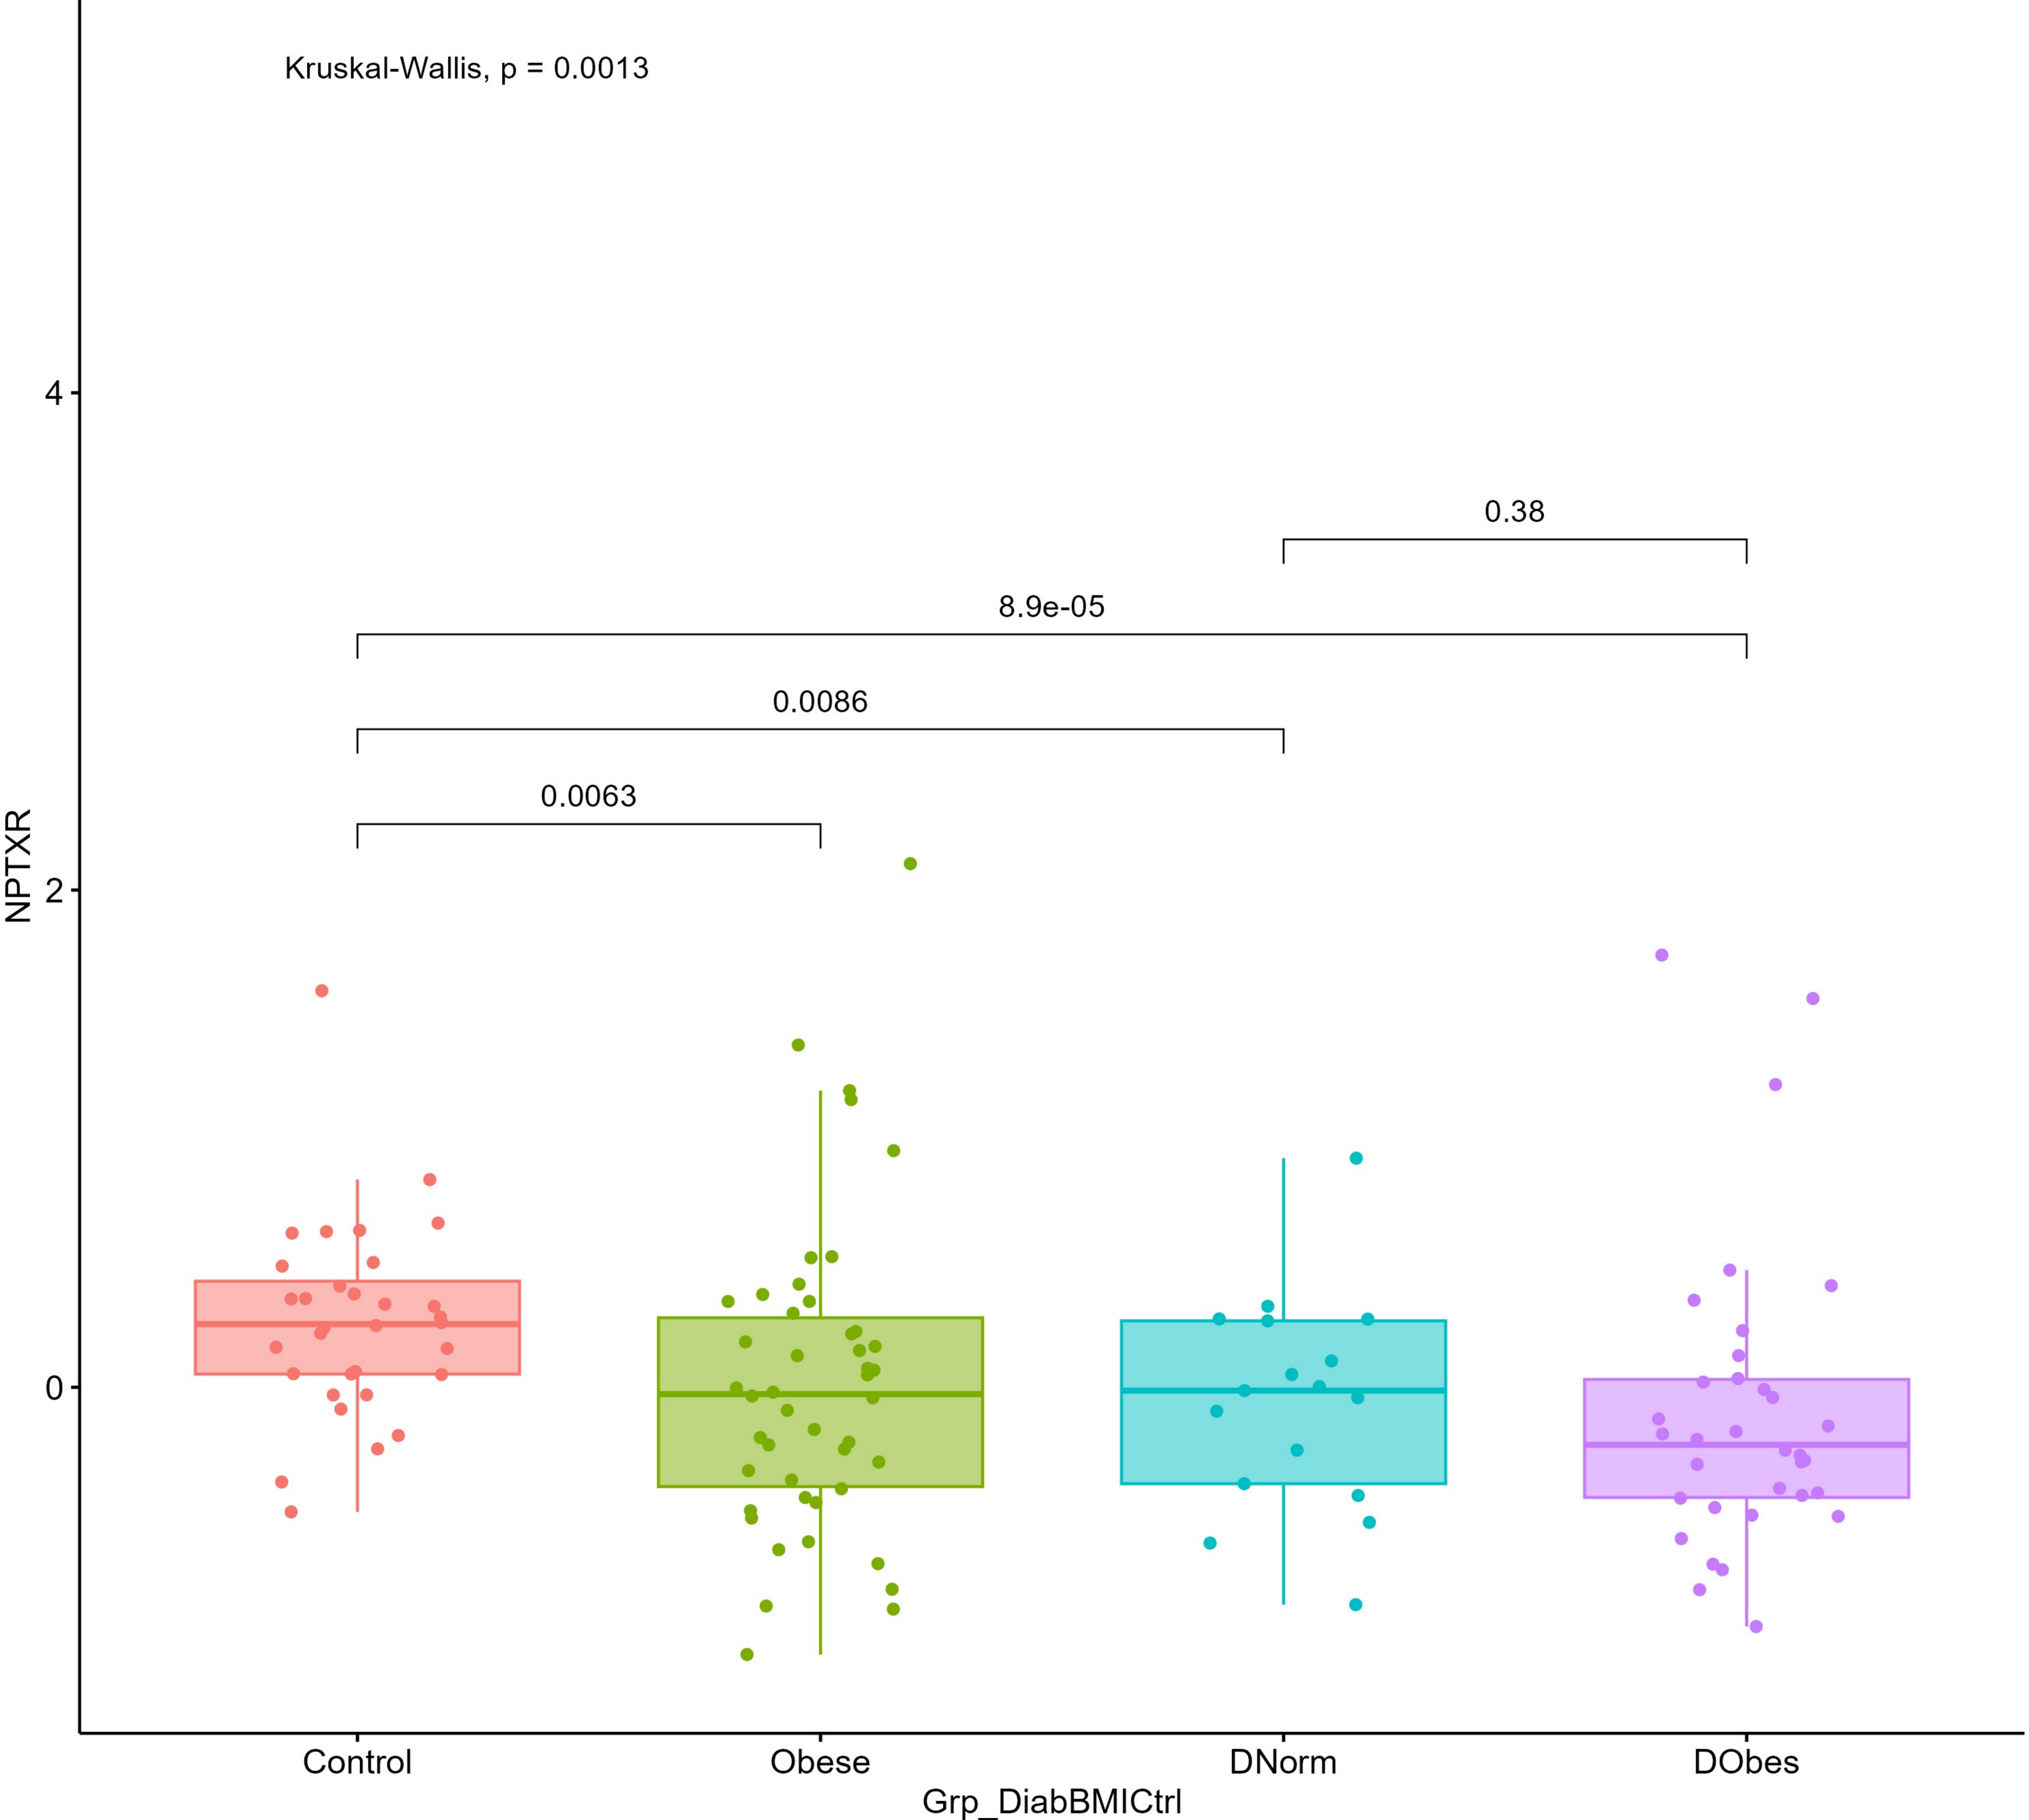

# Grp\_DiabBMICtrl

Grp\_DiabBMICtrl Control Obese DNorm DObes

Kruskal-Wallis, p = 0.0038

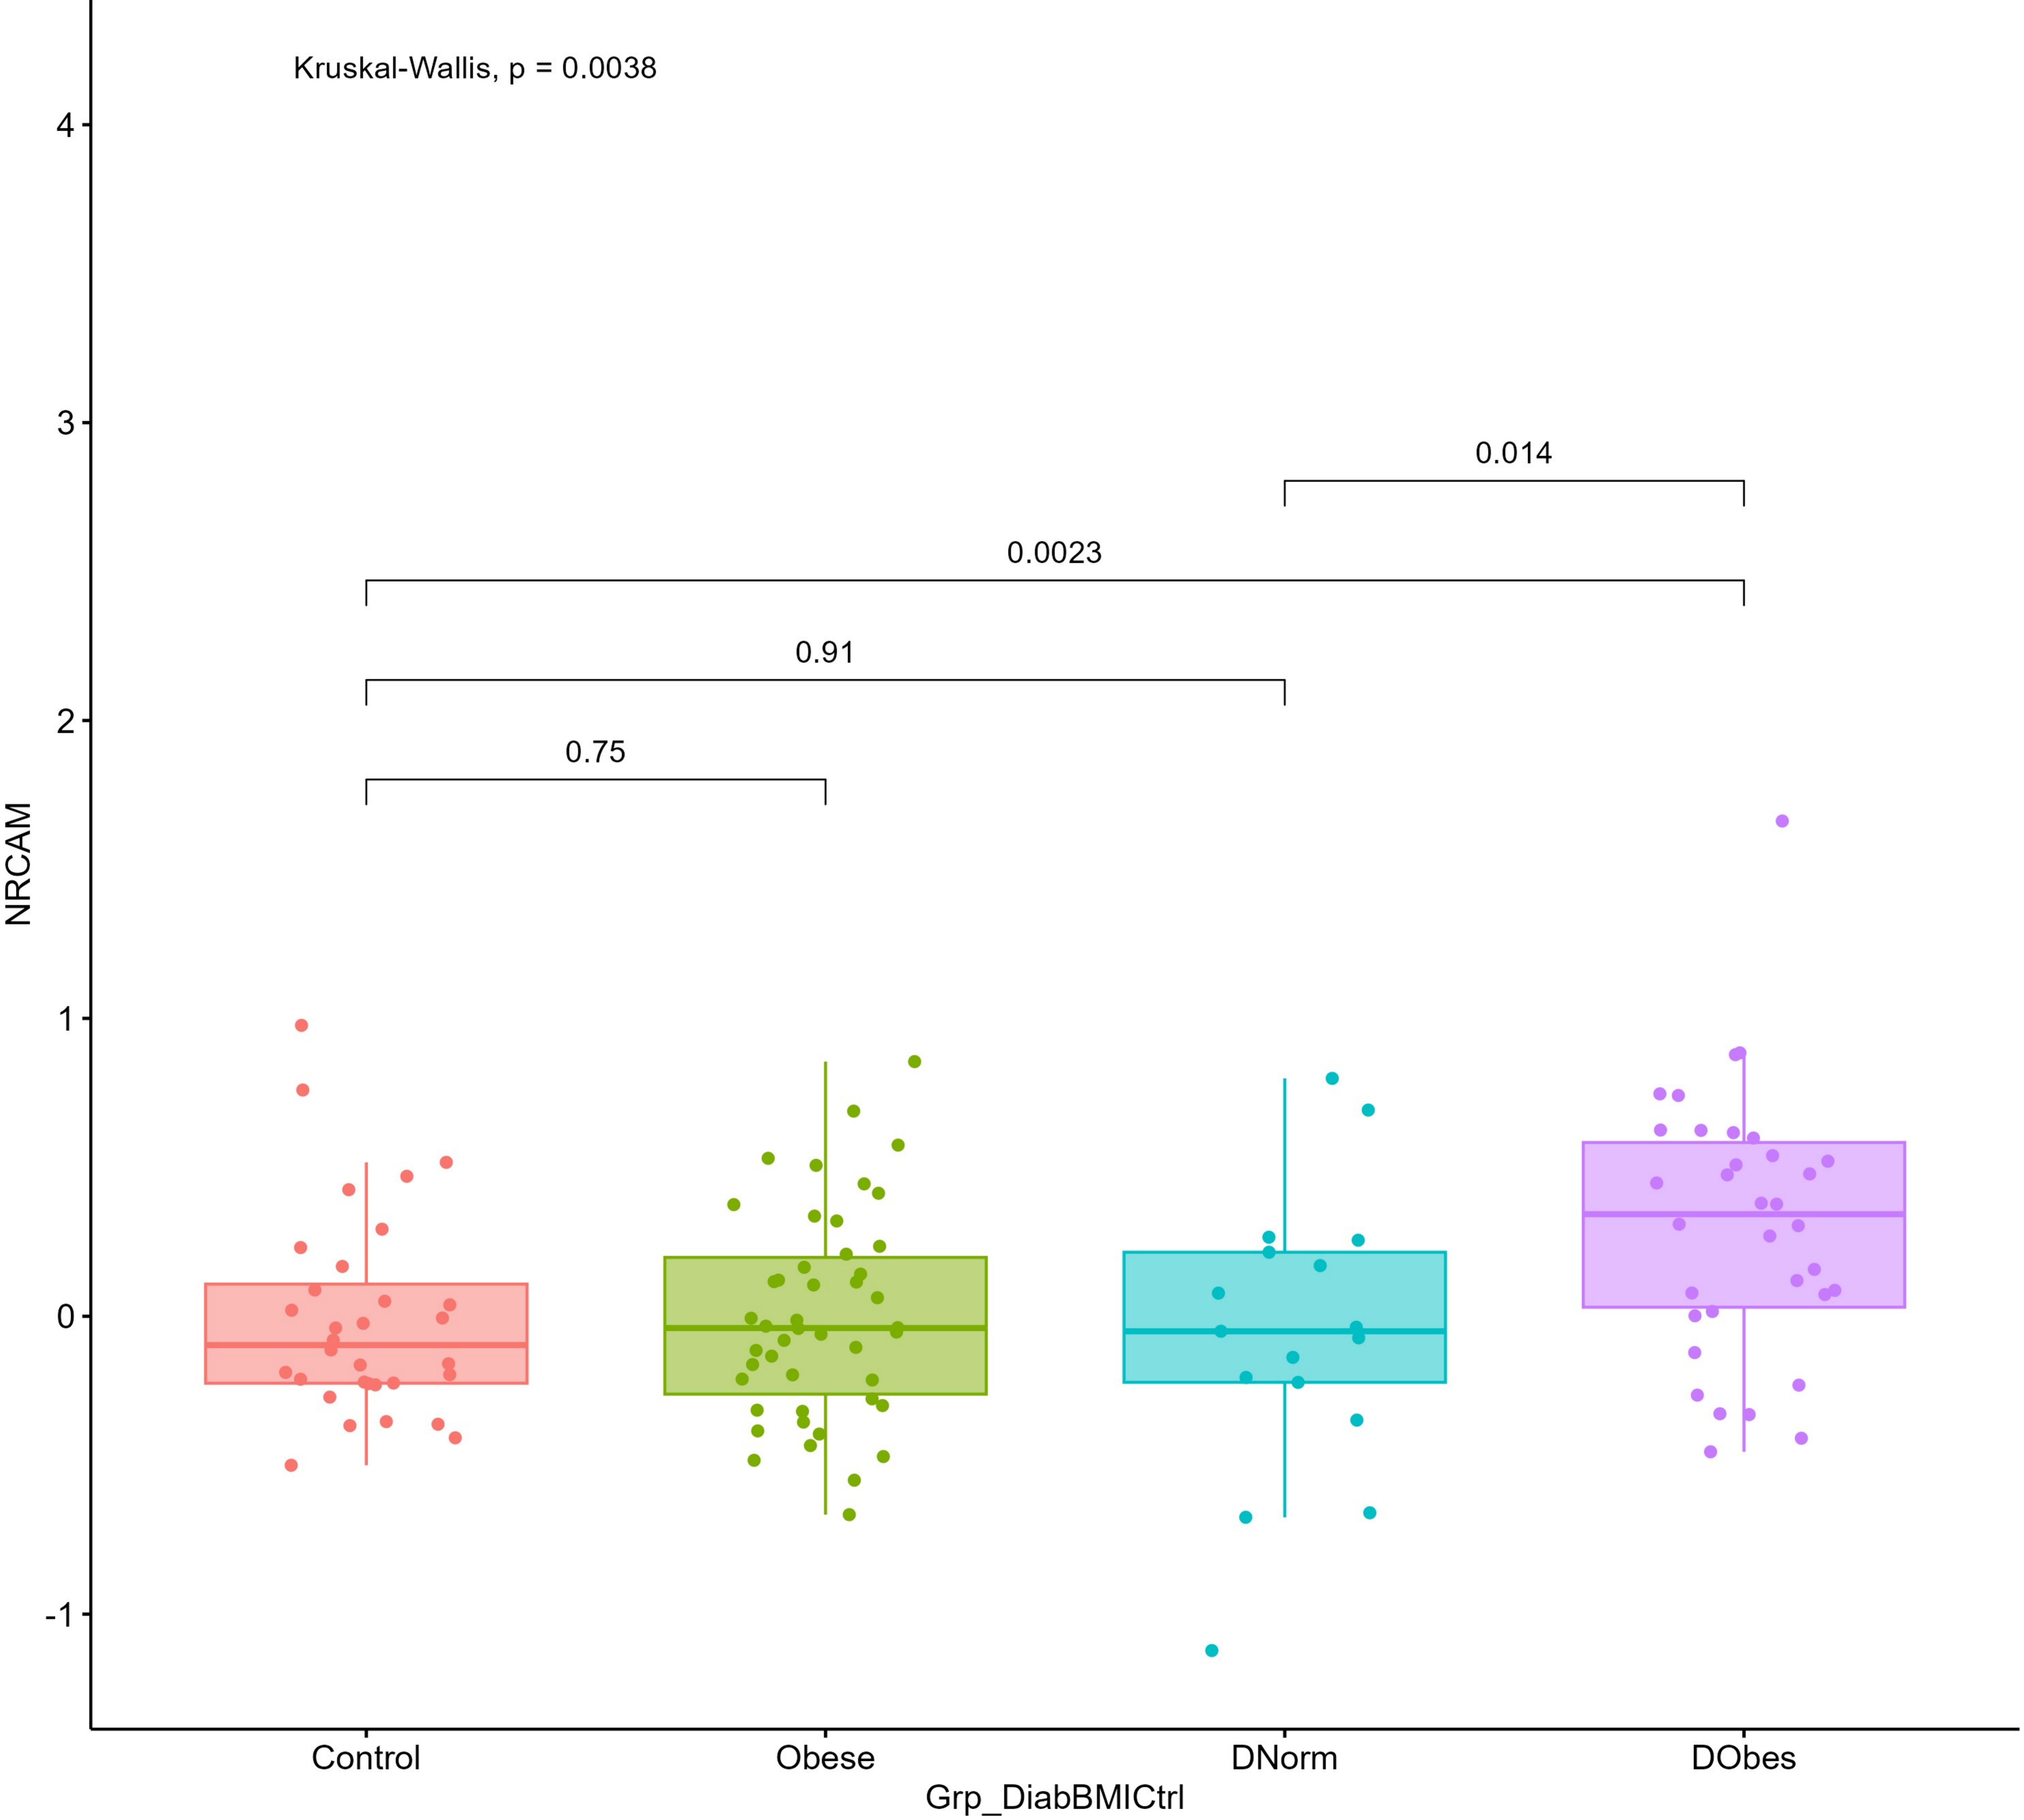

# Grp\_DiabBMICtrl

Grp\_DiabBMICtrl Control Obese DNorm DObes

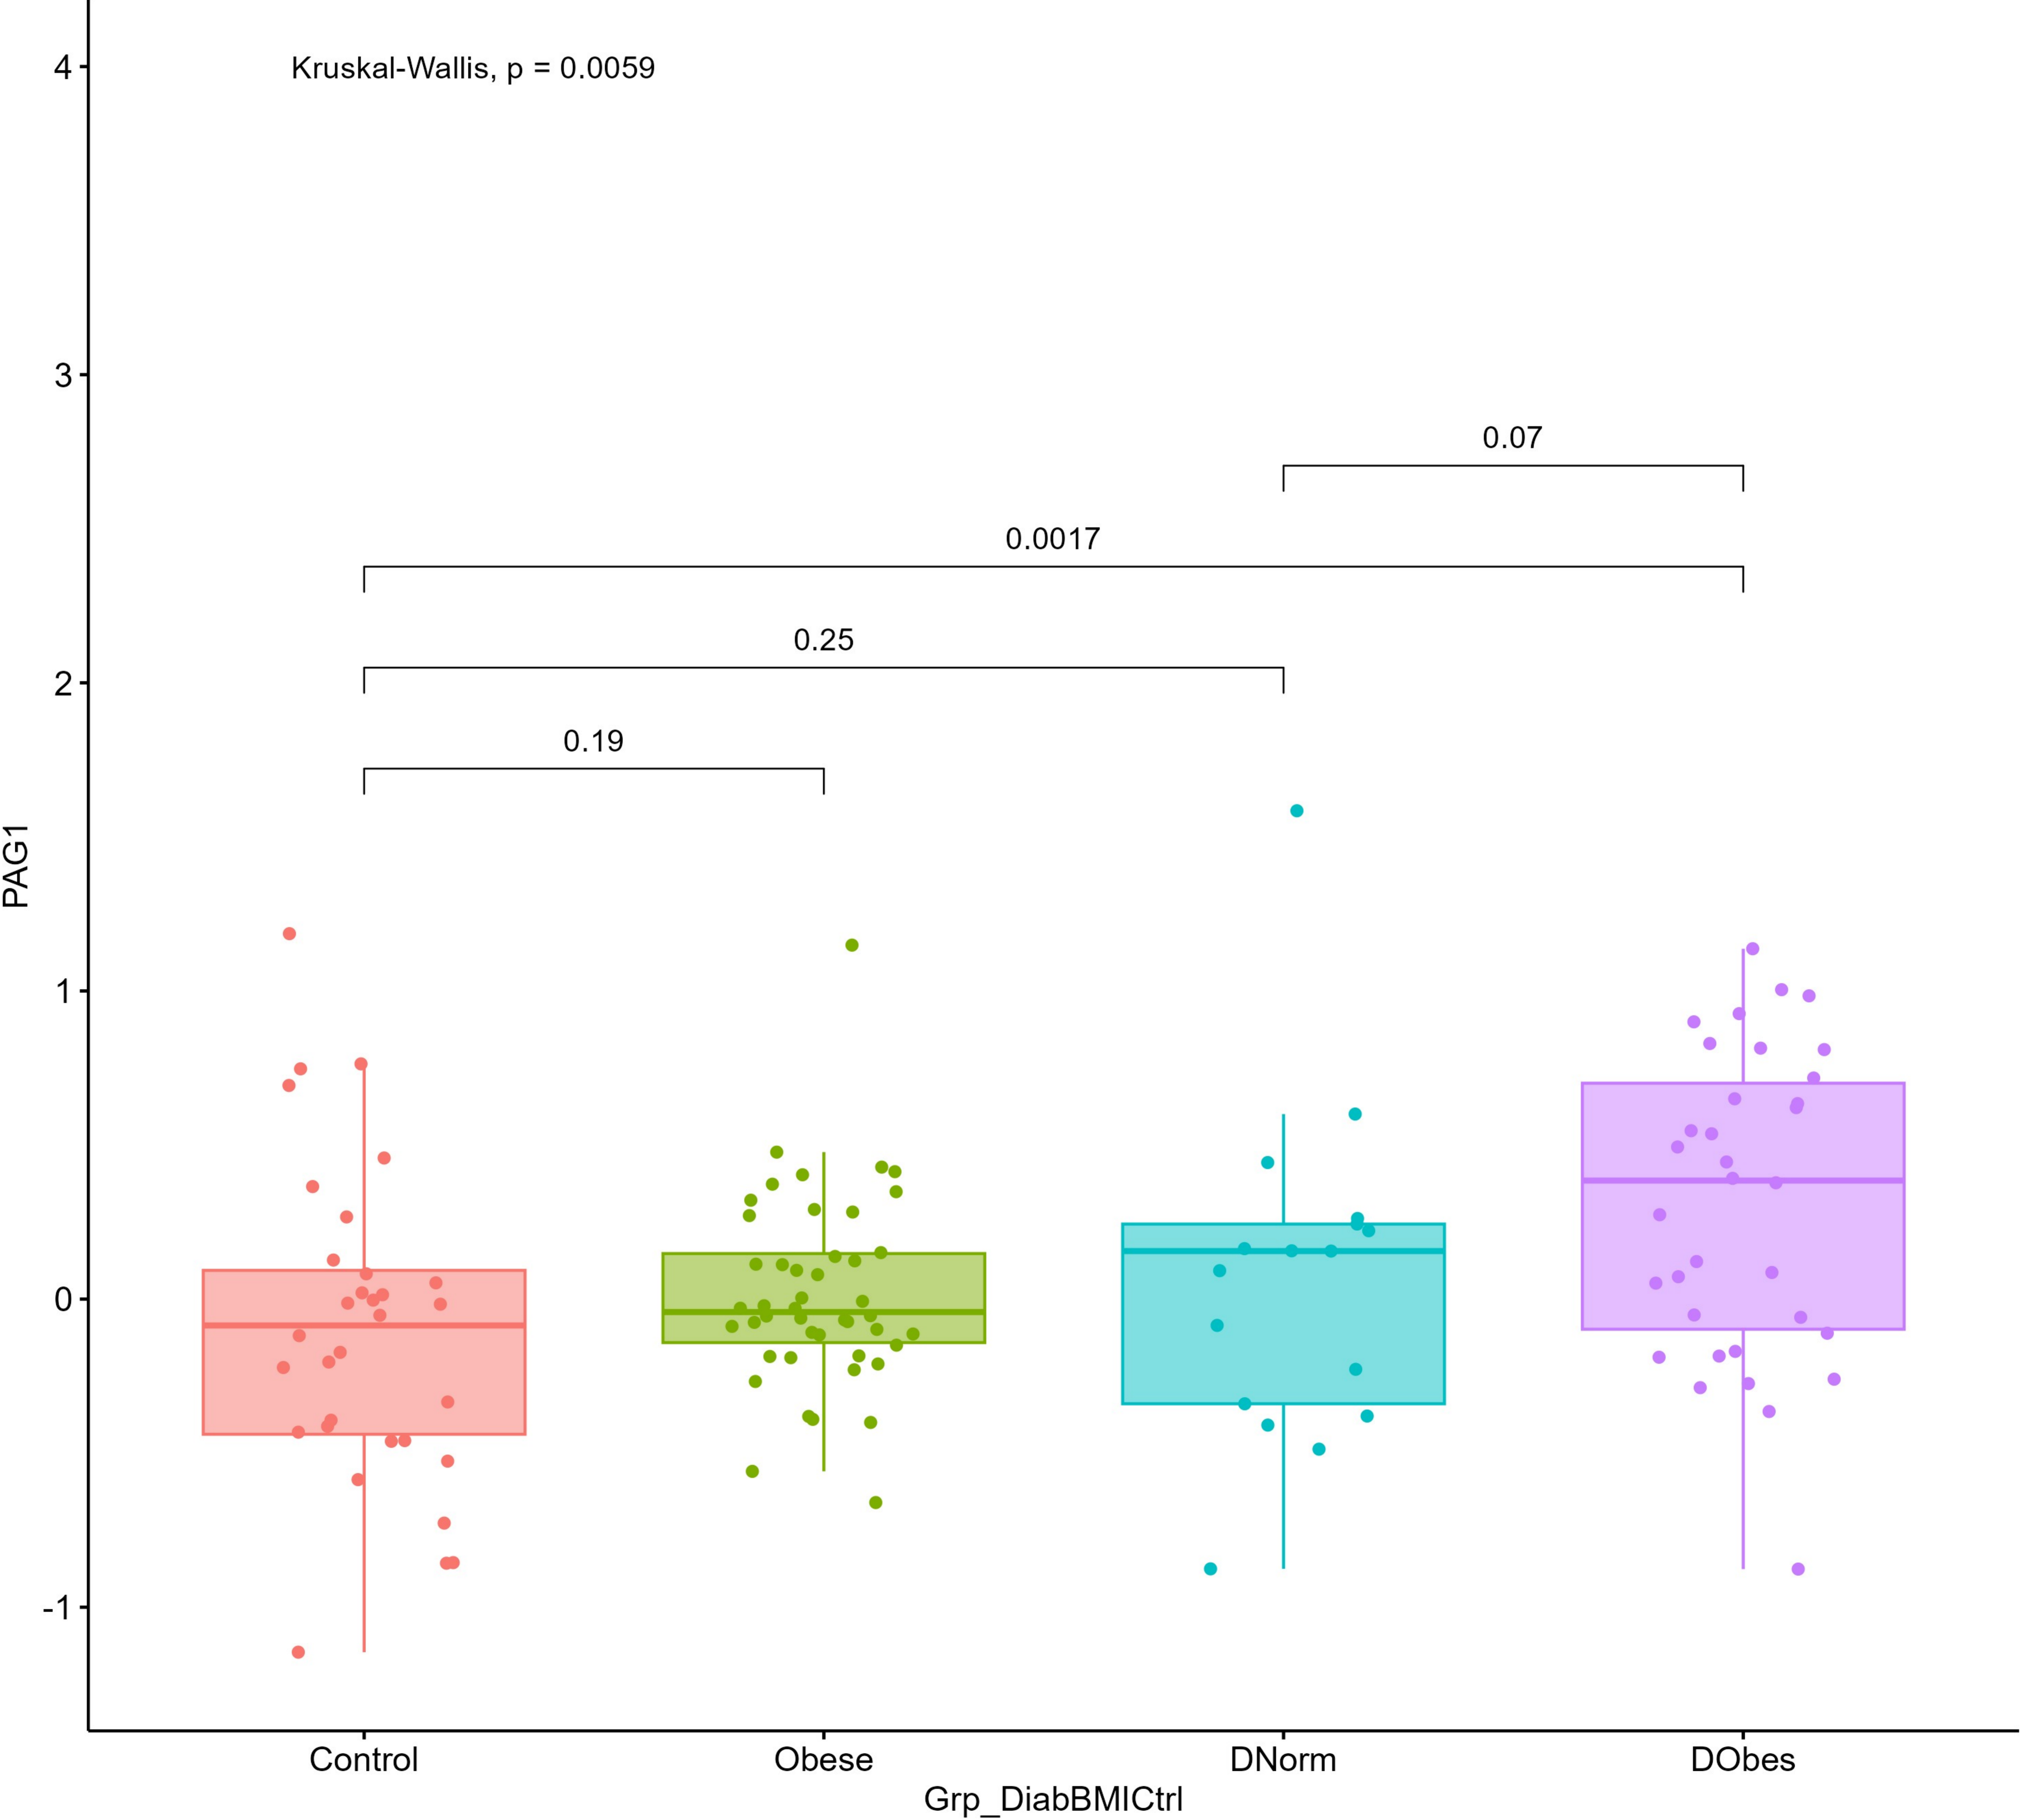

# Grp\_DiabBMICtrl

Grp\_DiabBMICtrl Control Obese DNorm DObes

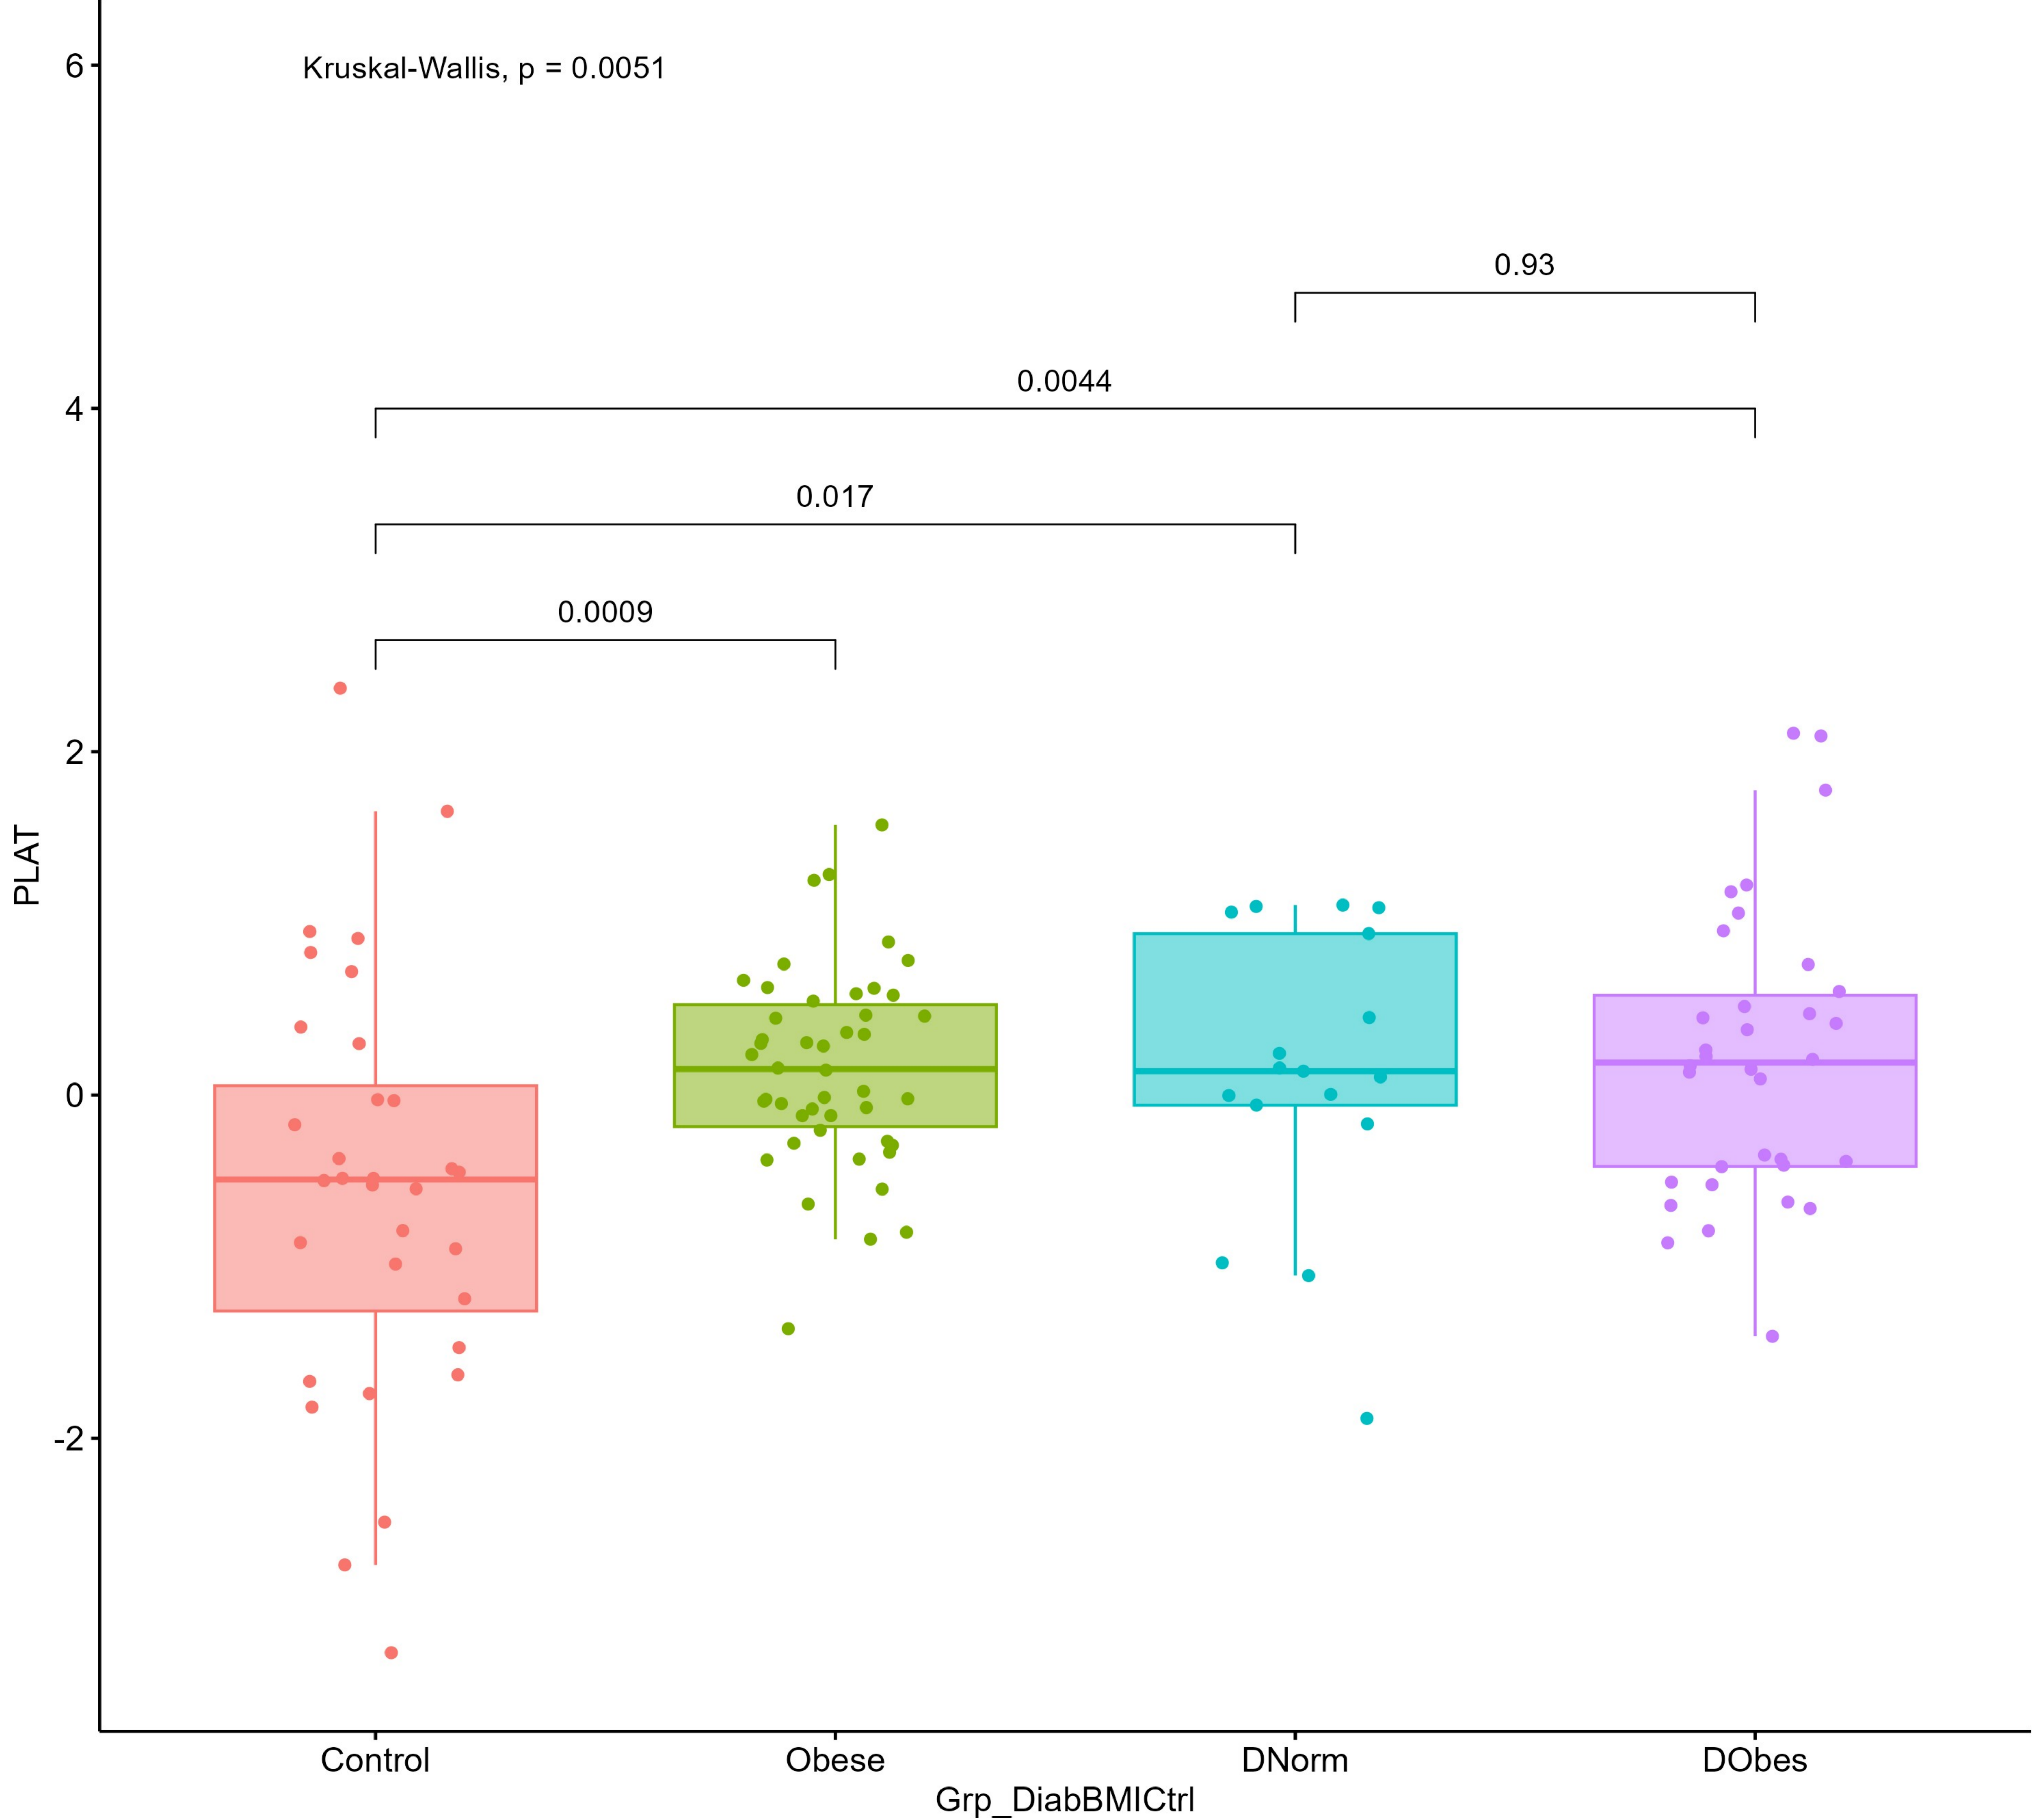

# Grp\_DiabBMICtrl

Grp\_DiabBMICtrl Control Obese DNorm DObes

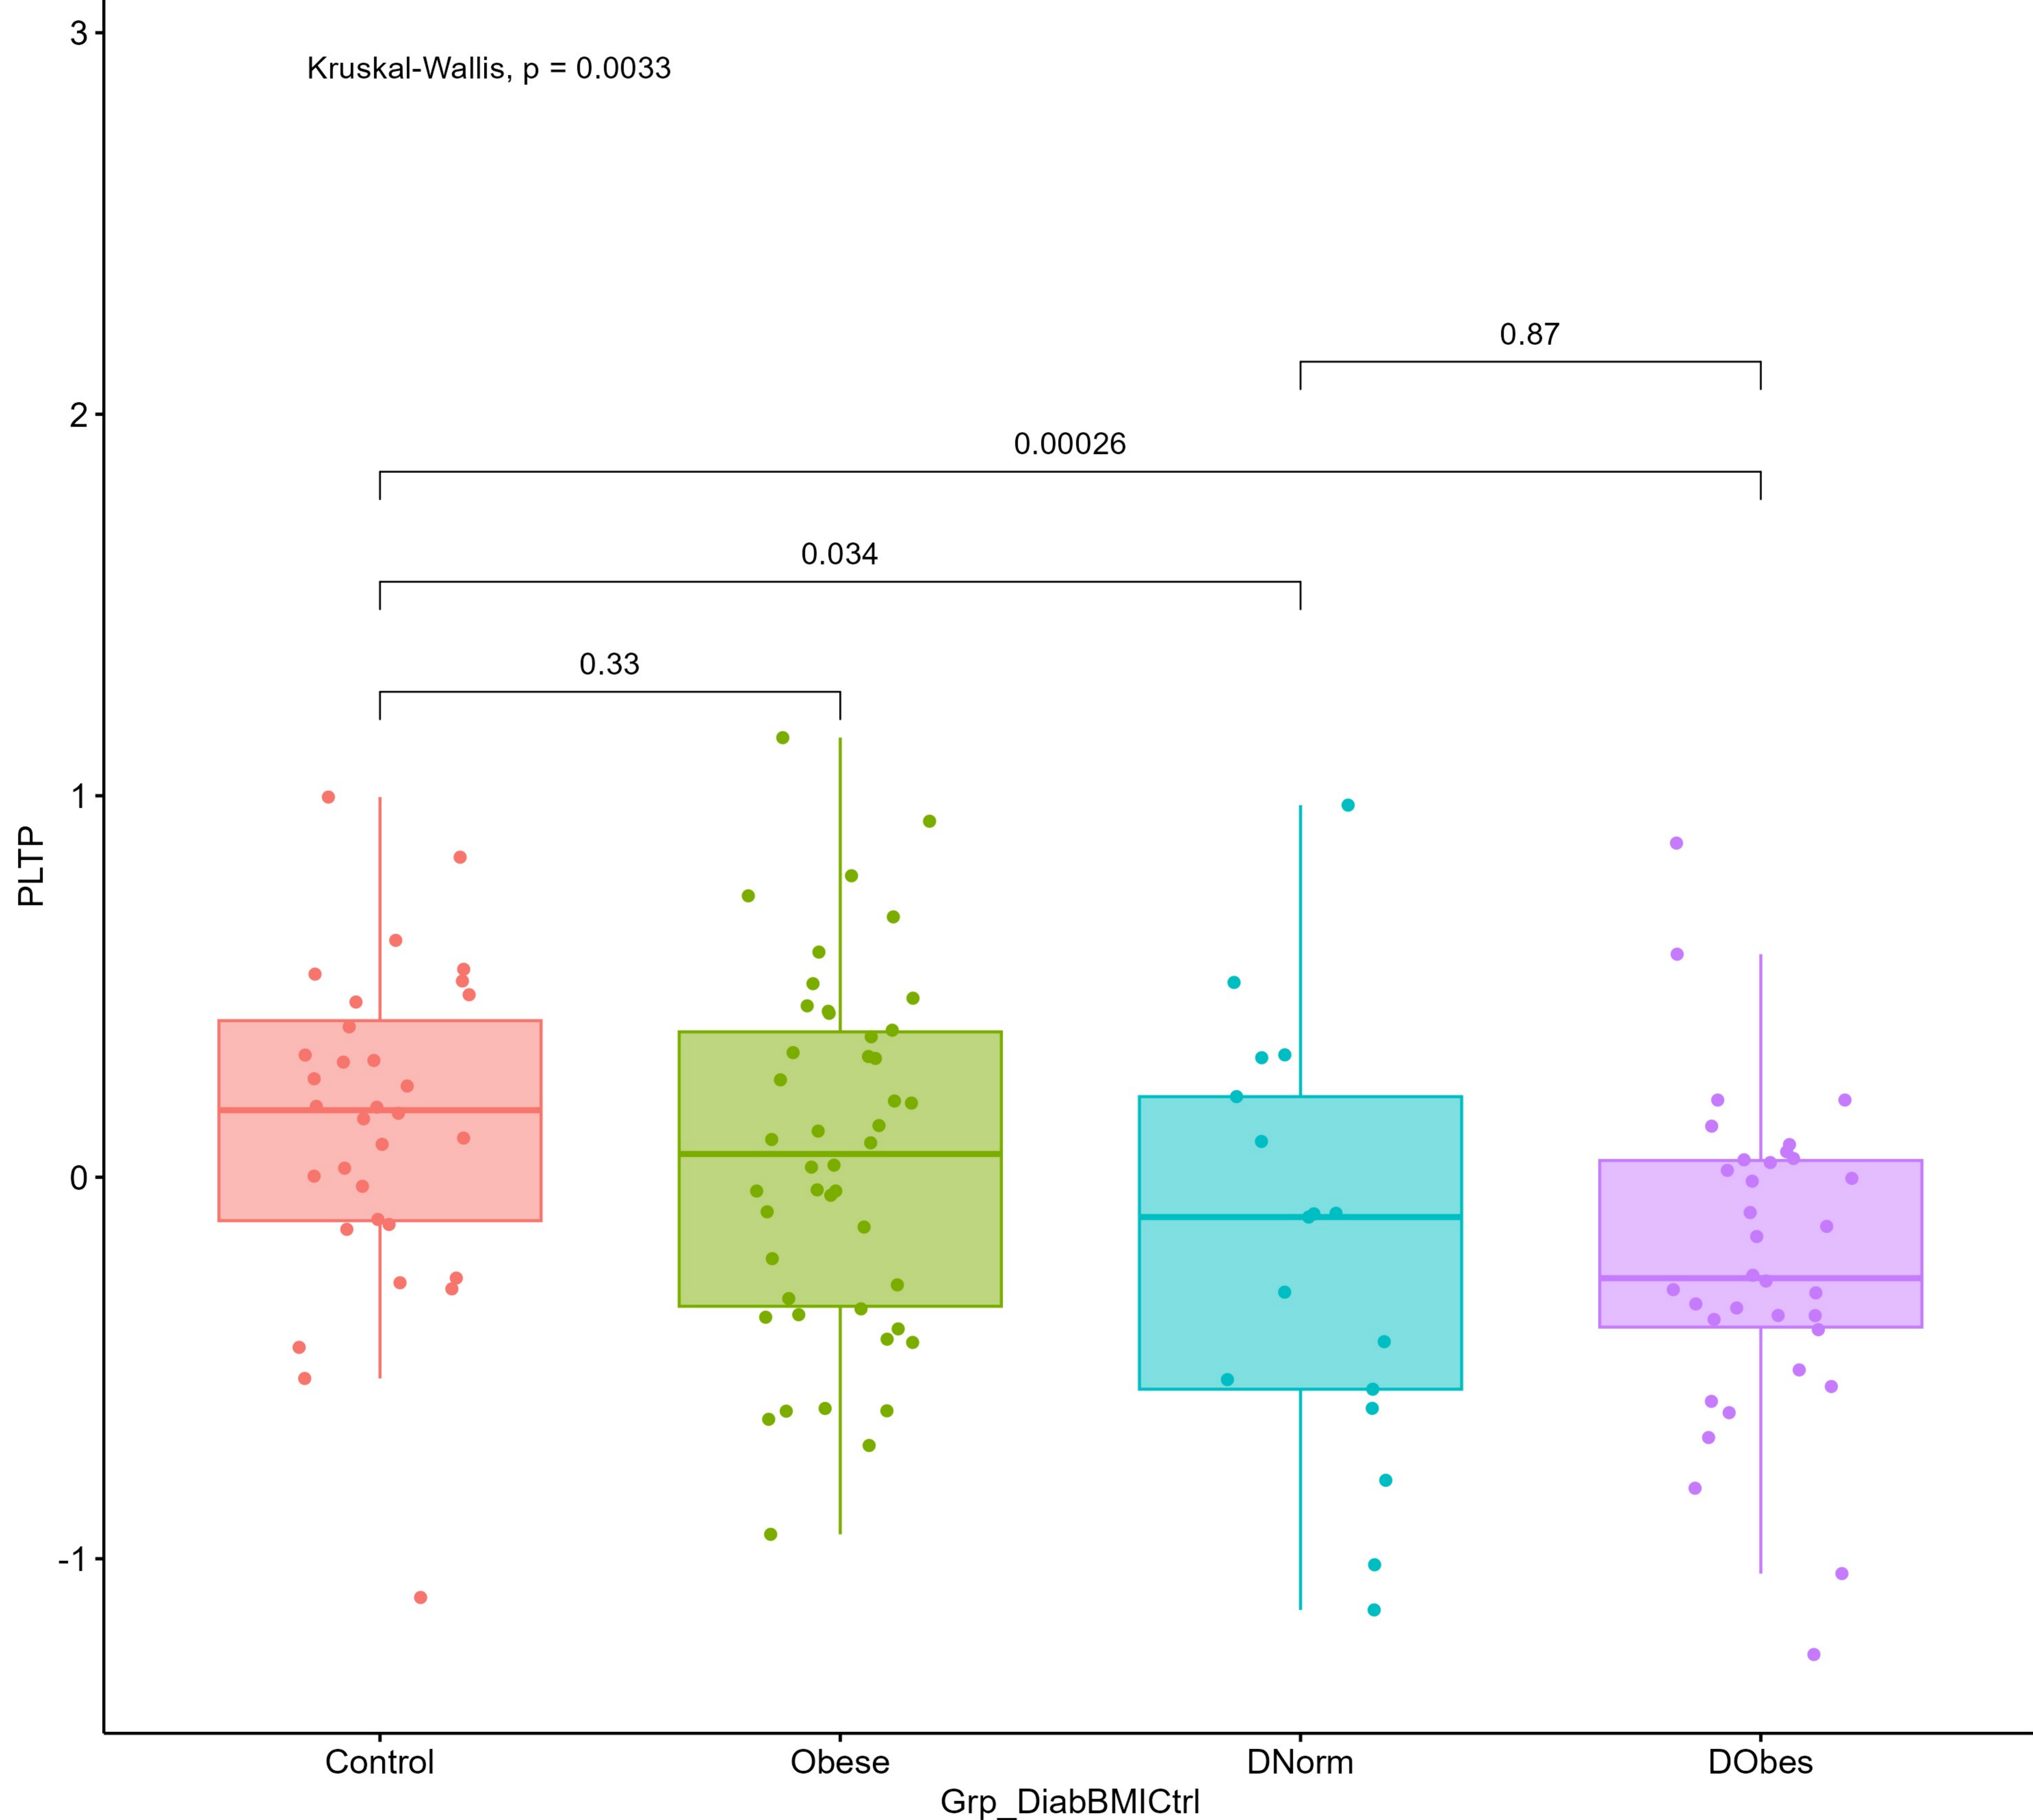

# Grp\_DiabBMICtrl

Grp\_DiabBMICtrl Control Obese DNorm DObes

Kruskal-Wallis,  $p = 6.1\text{e-}06$

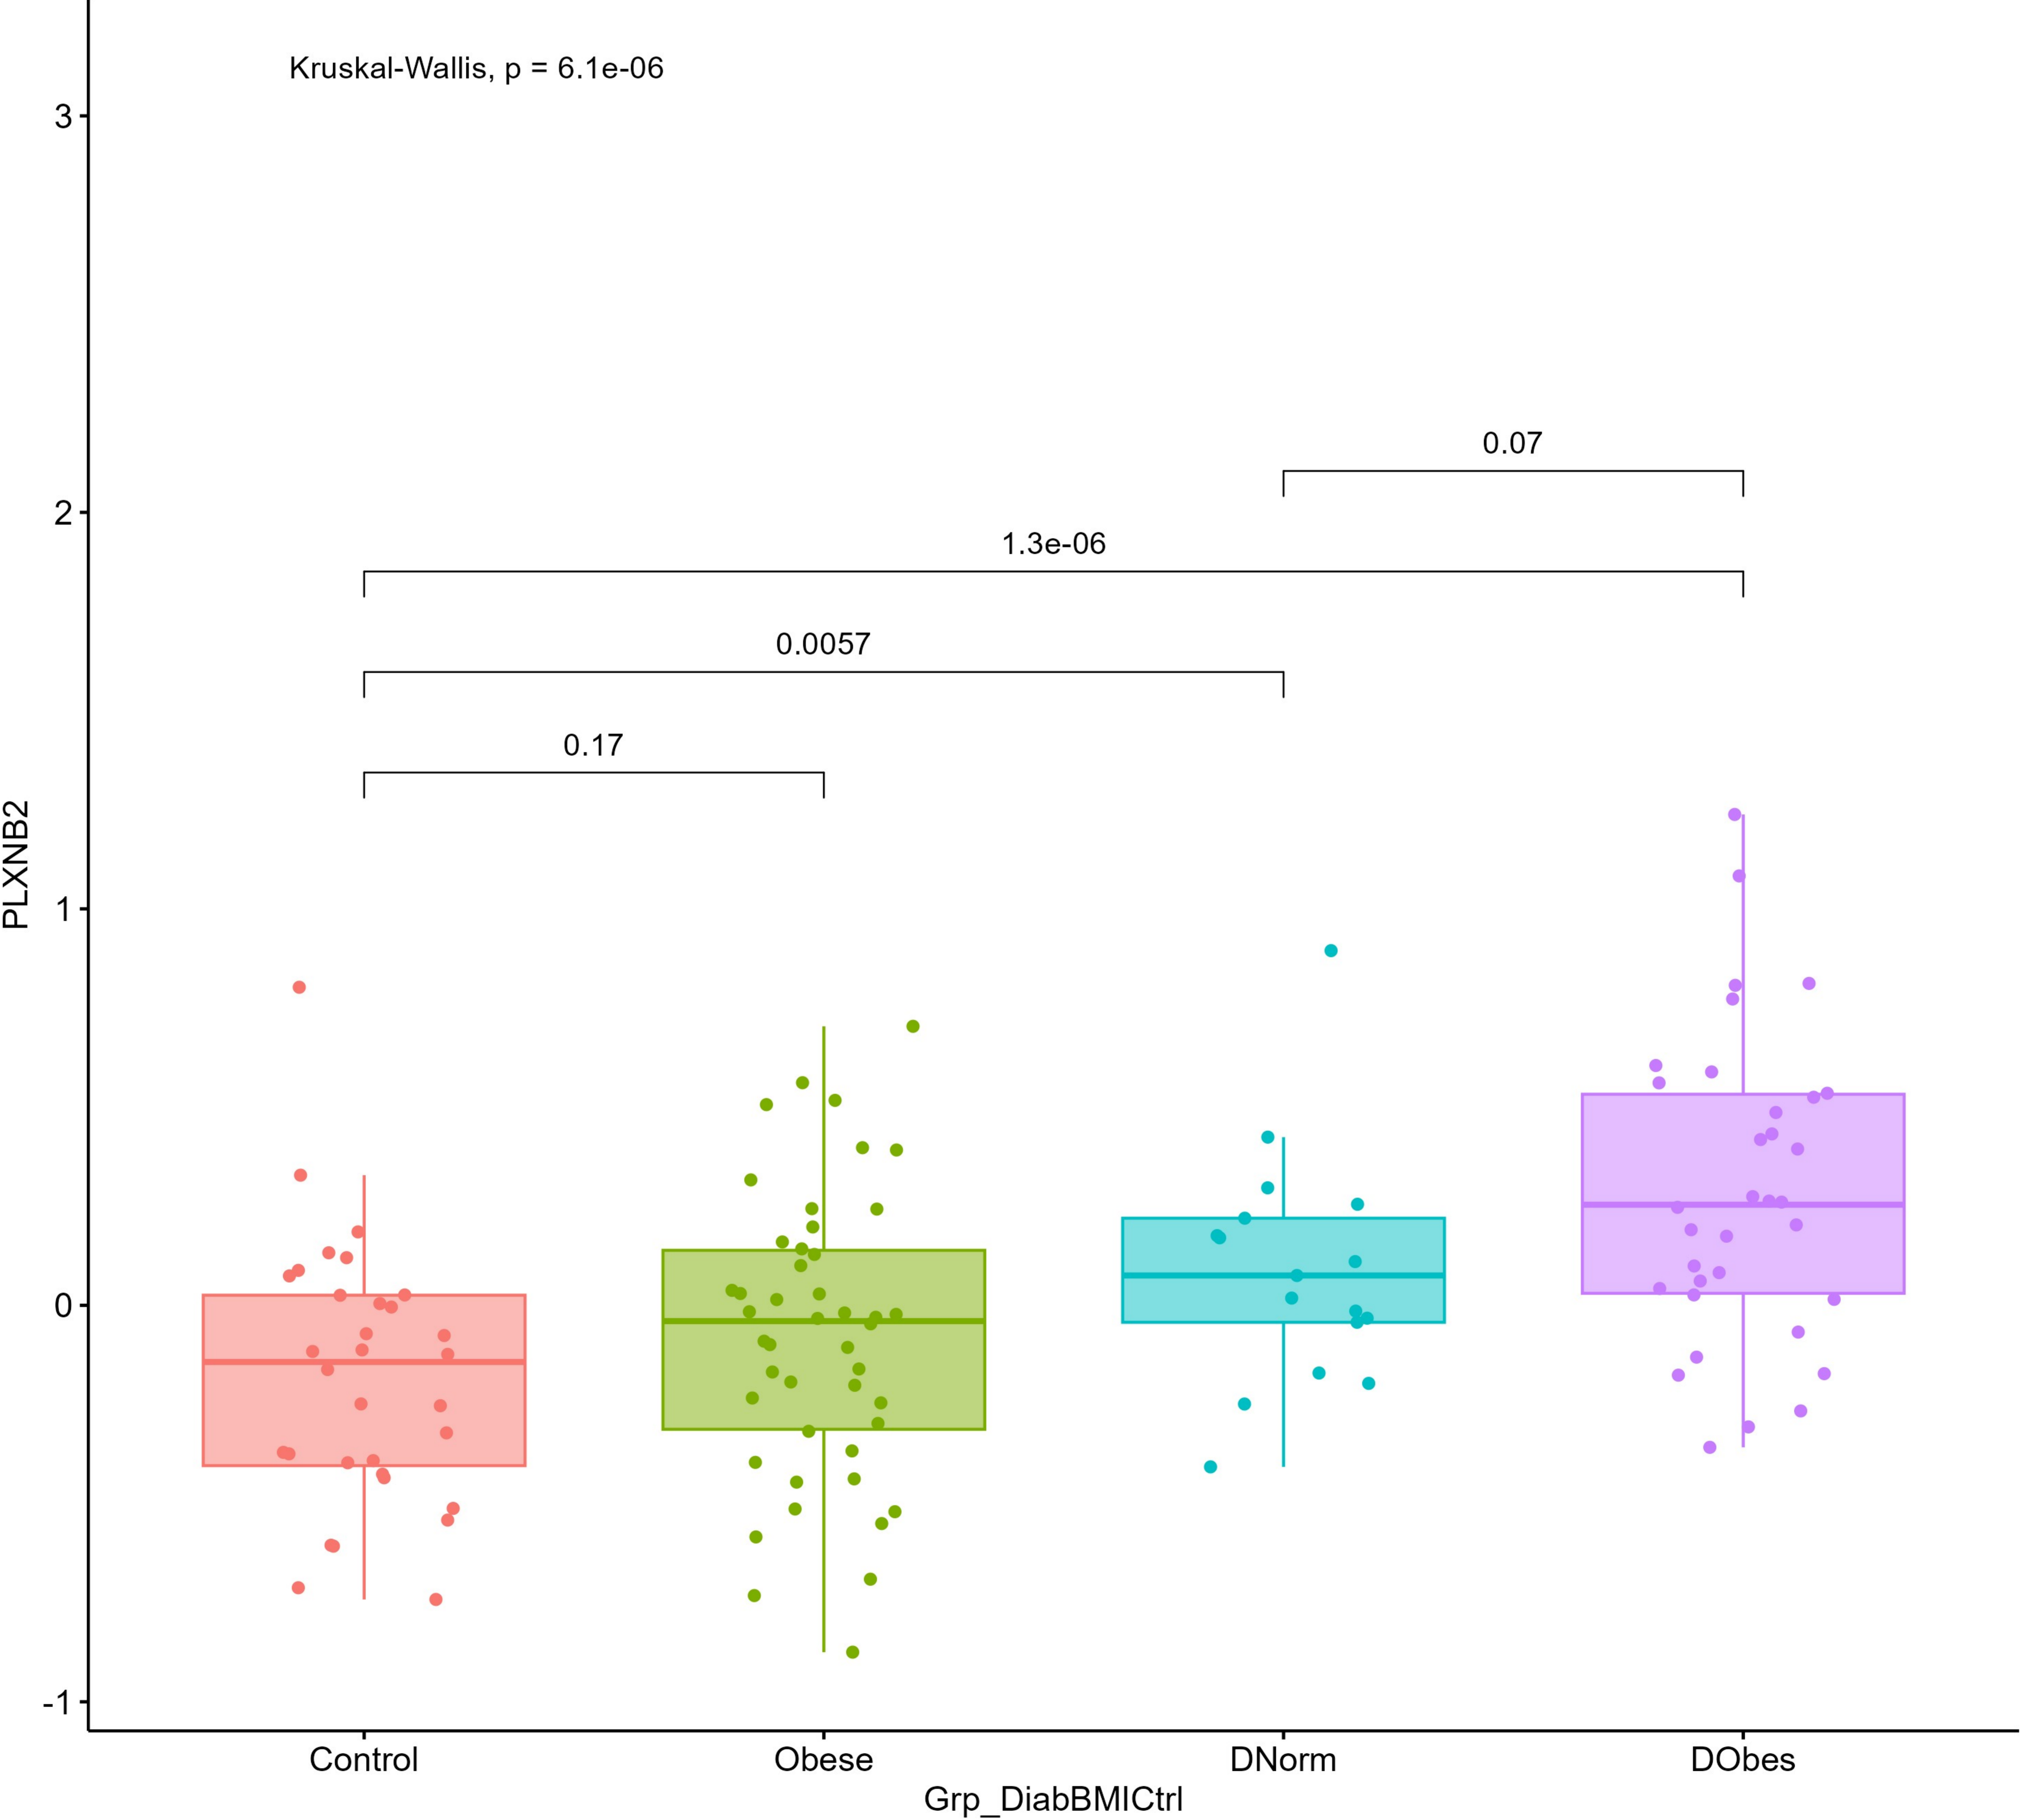

# Grp\_DiabBMICtrl

Grp\_DiabBMICtrl Control Obese DNorm DObes

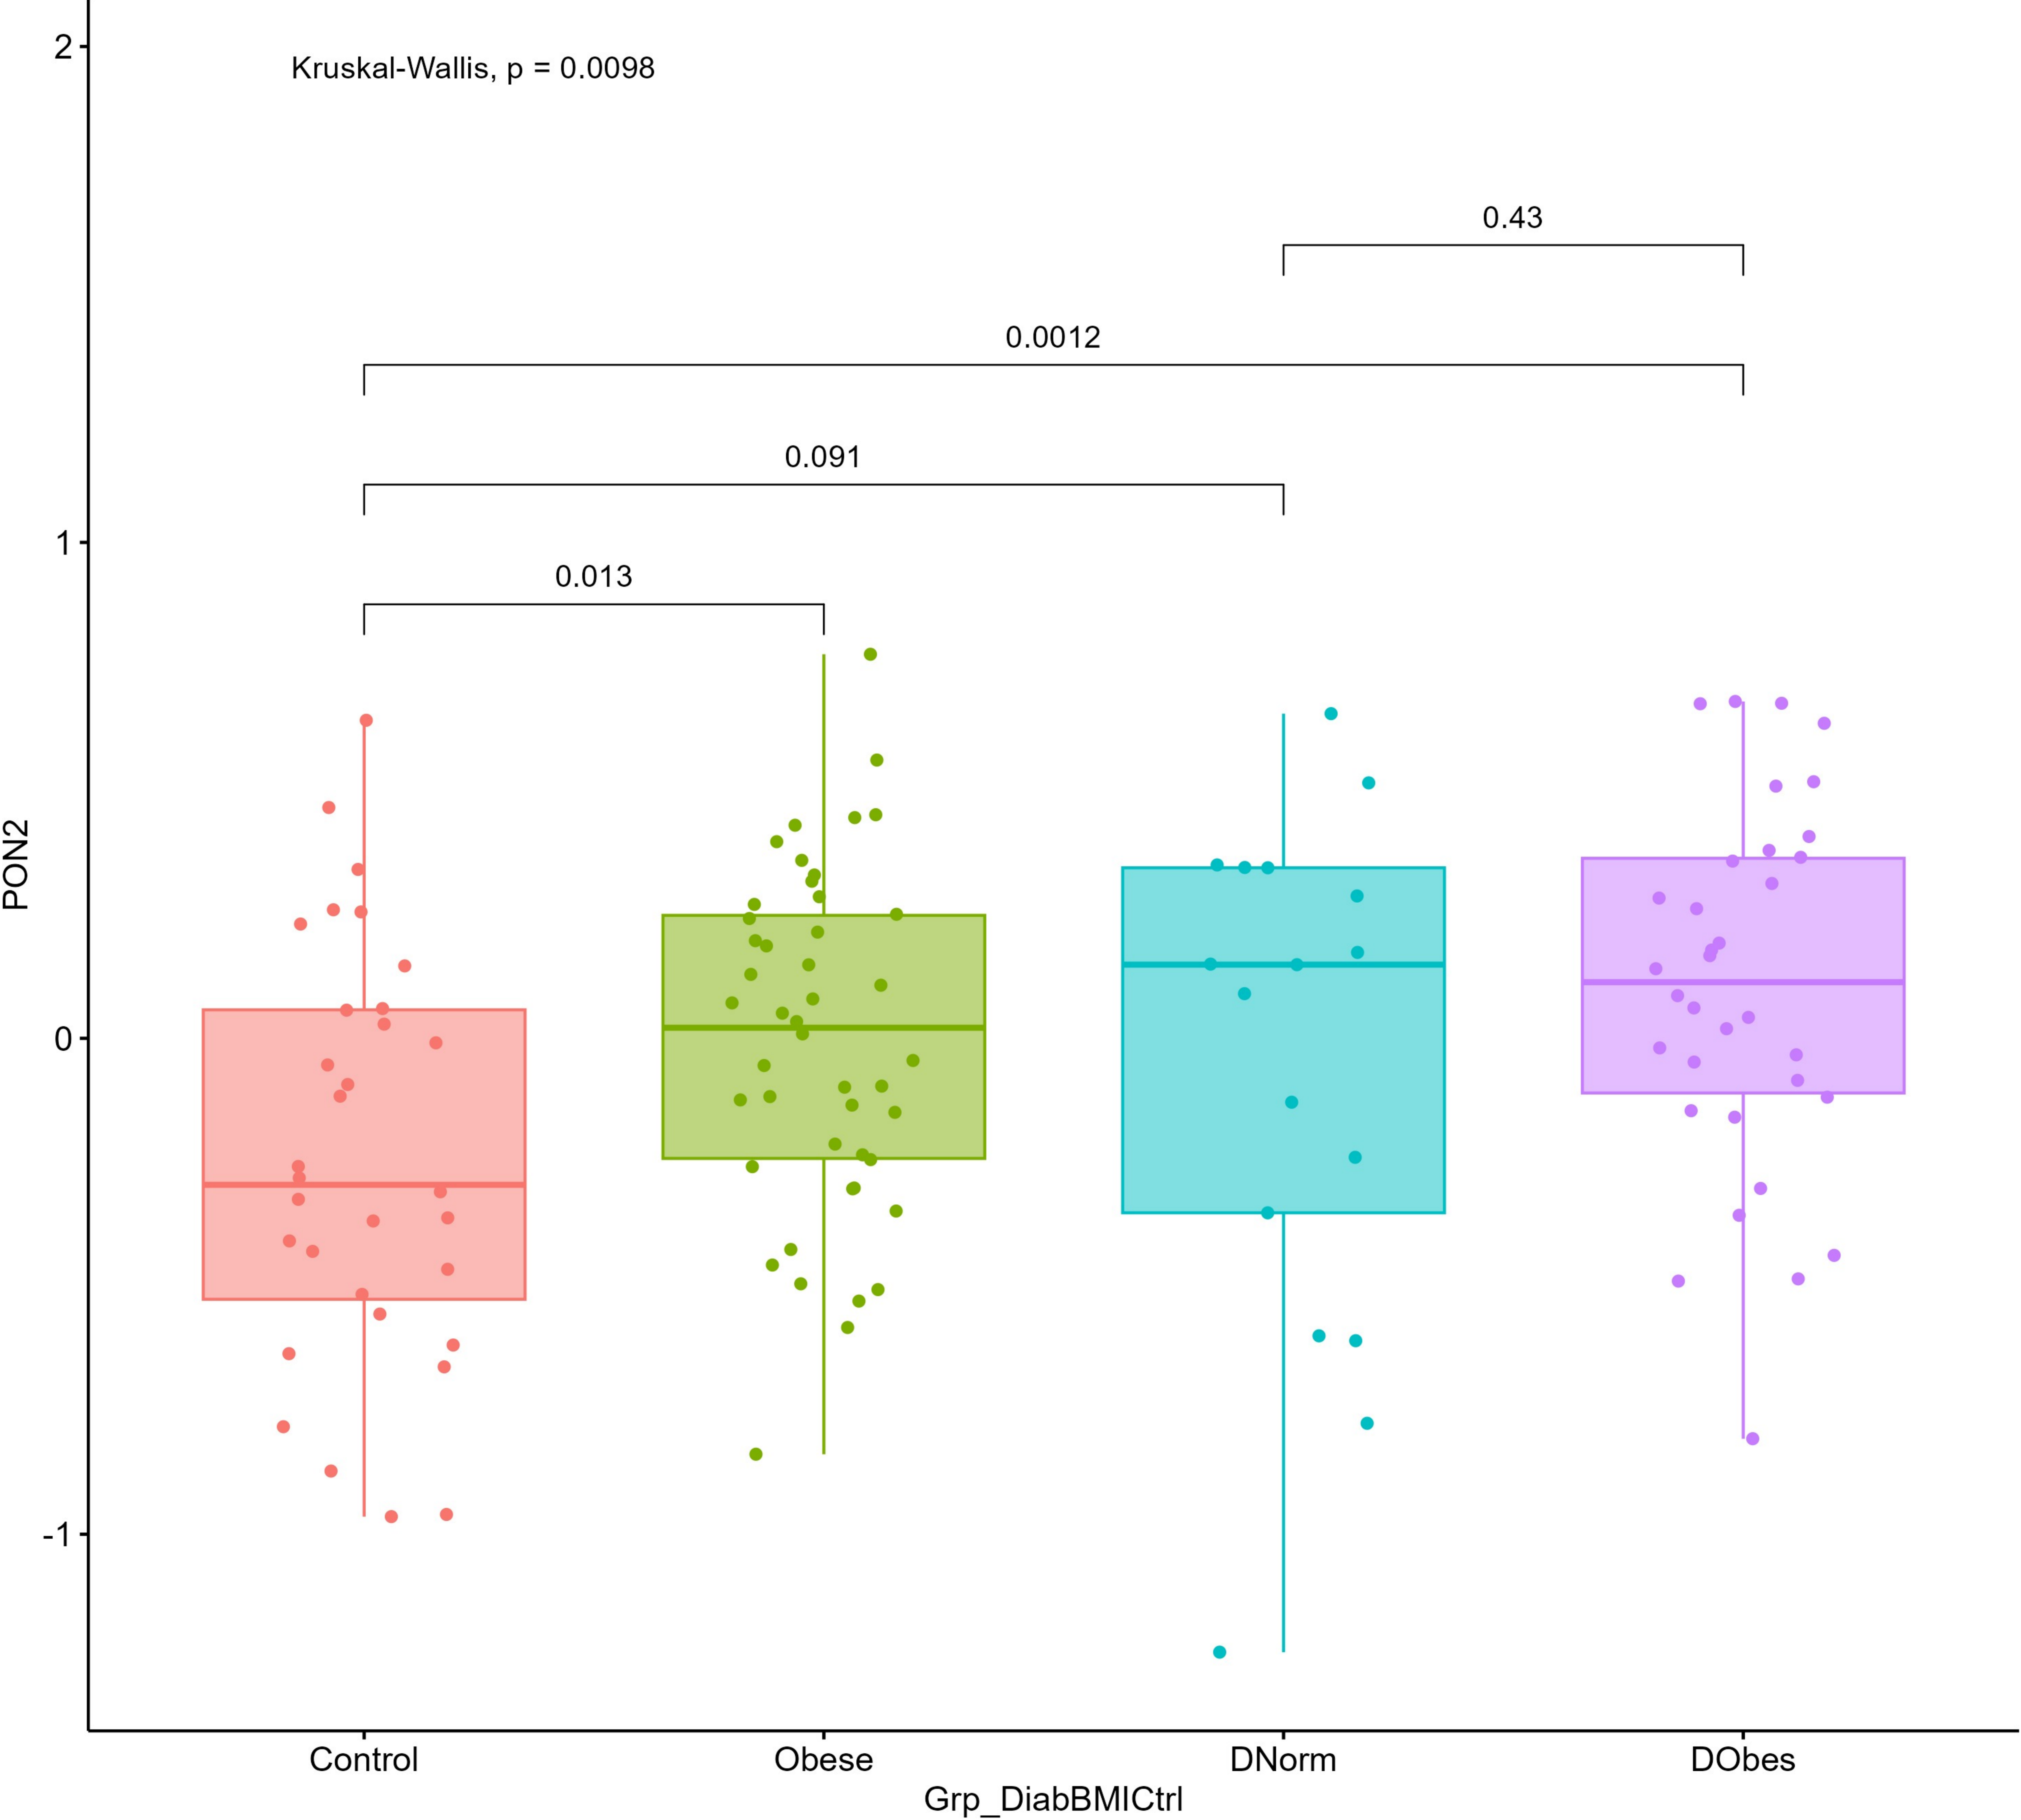

# Grp\_DiabBMICtrl

Grp\_DiabBMICtrl Control Obese DNorm DObes

Kruskal-Wallis,  $p = 1.9\text{e-}07$

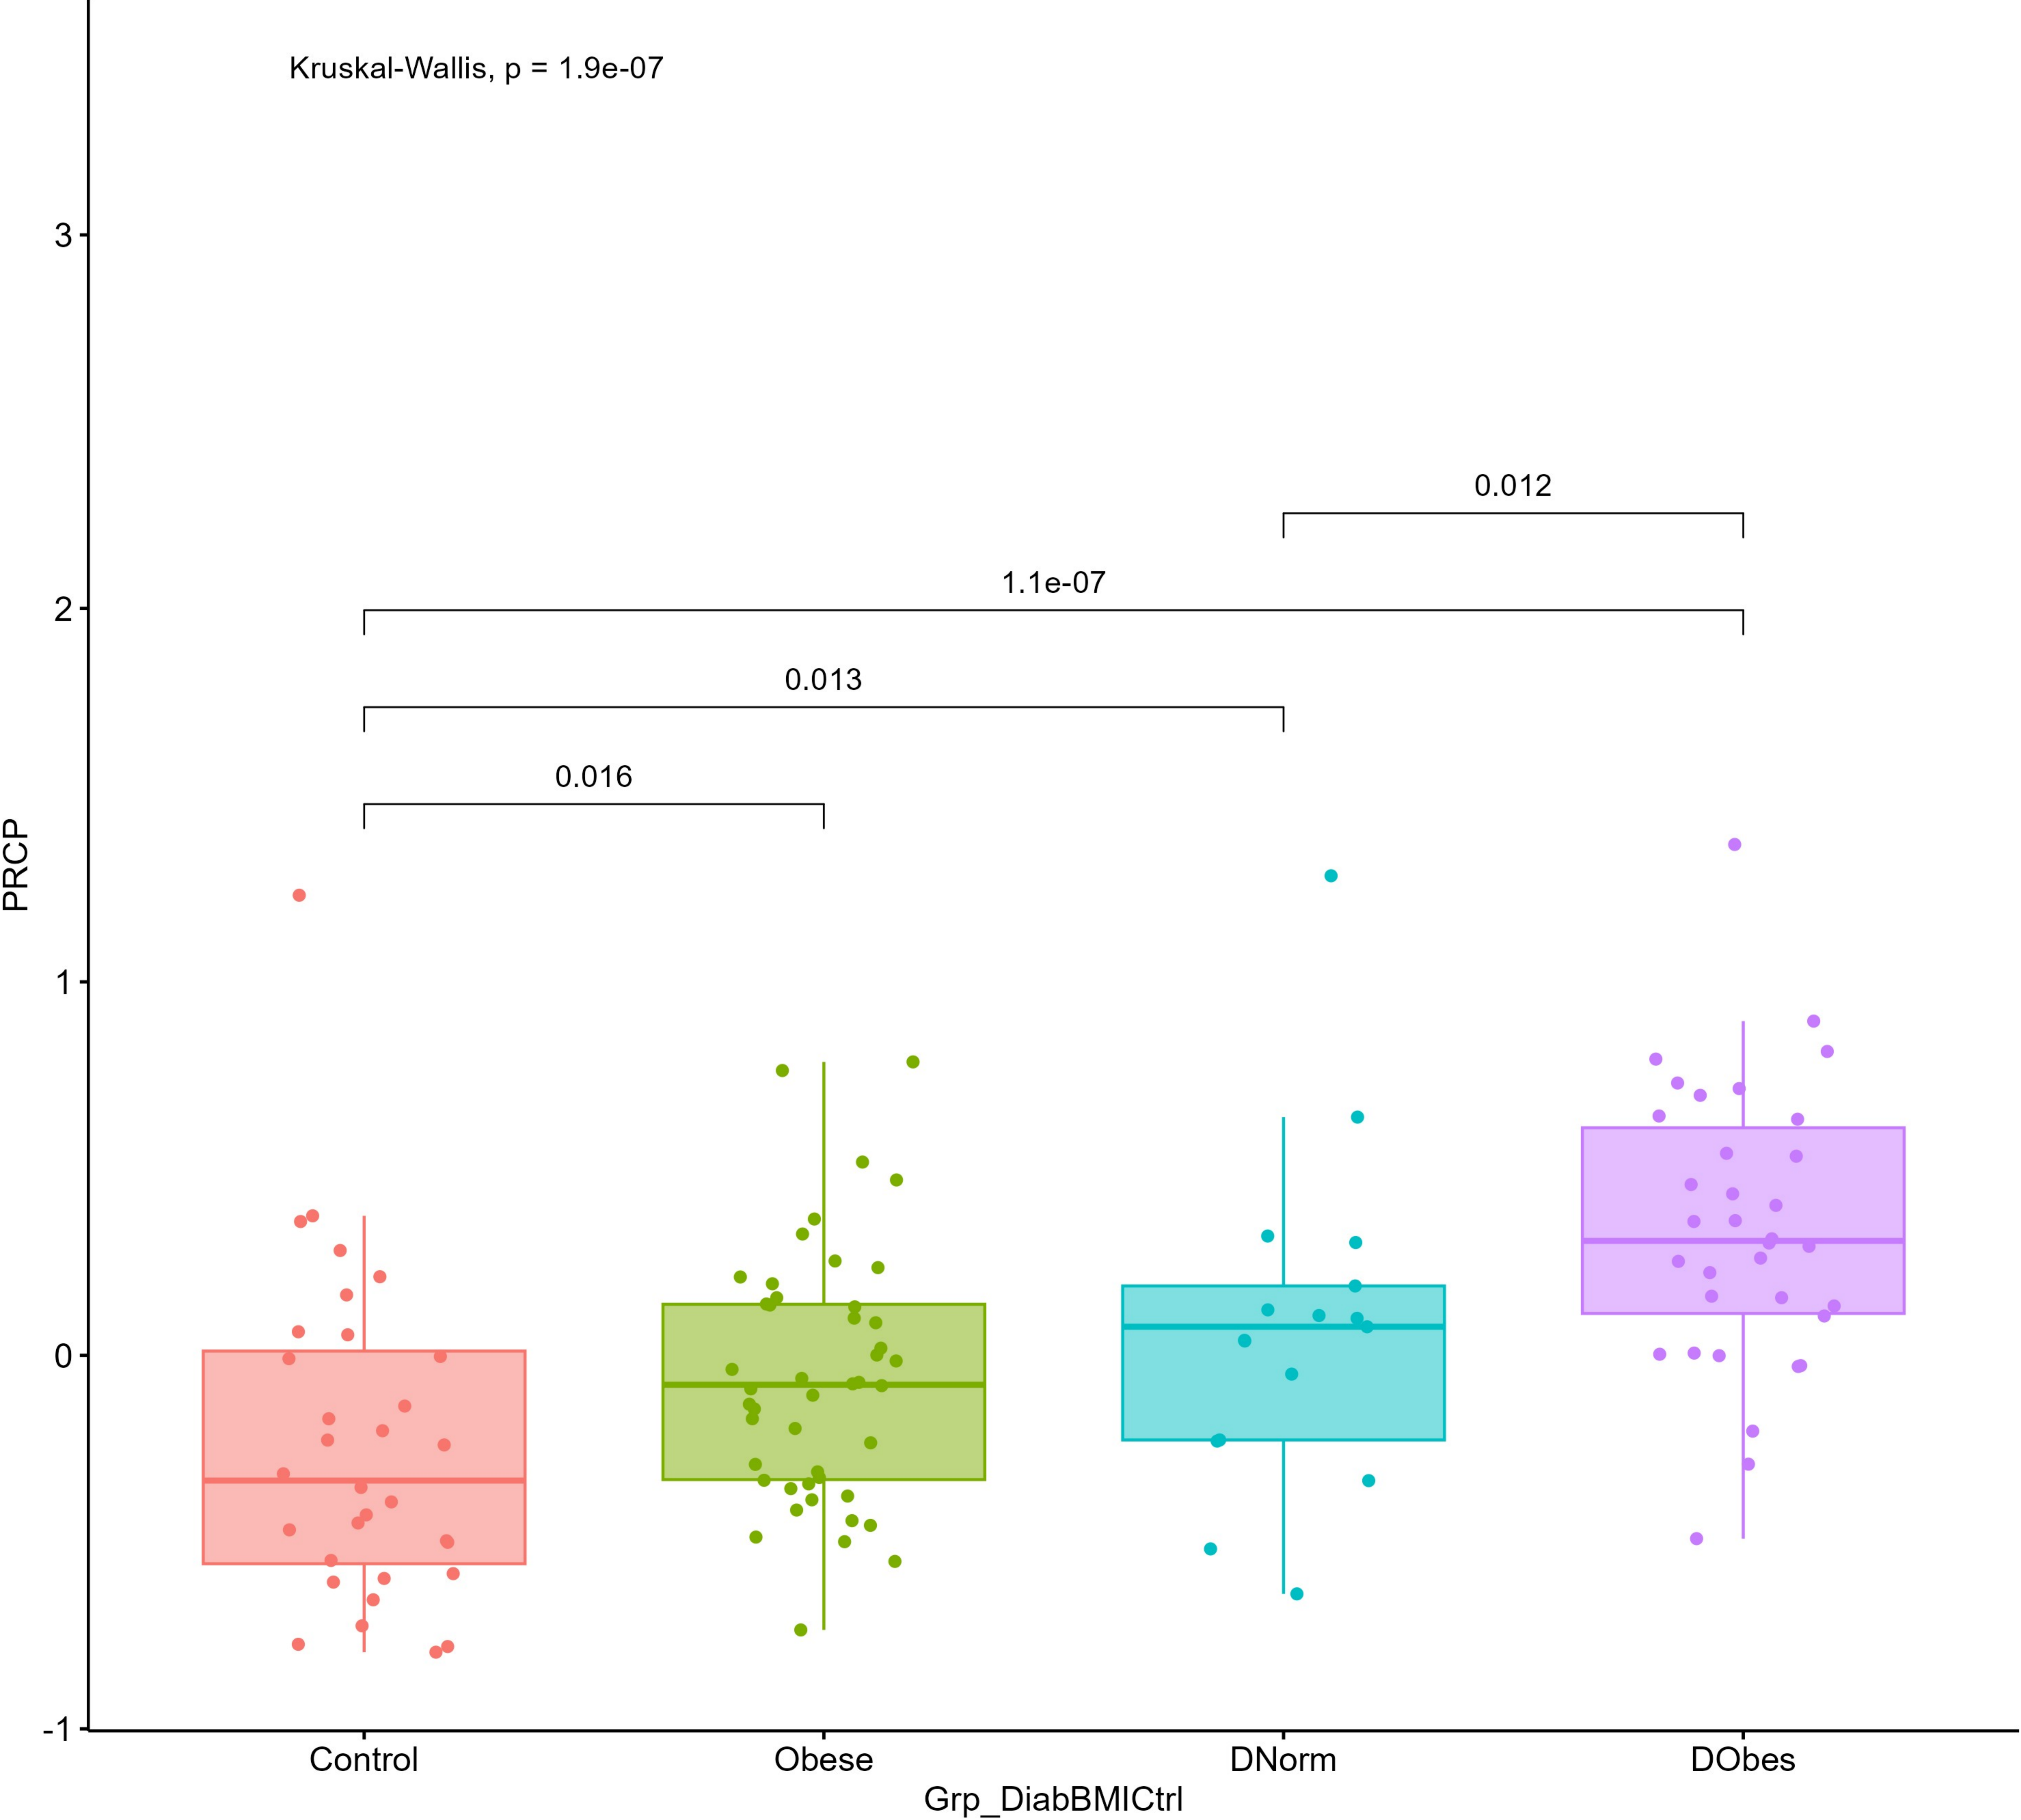

# Grp\_DiabBMICtrl

Grp\_DiabBMICtrl Control Obese DNorm DObes

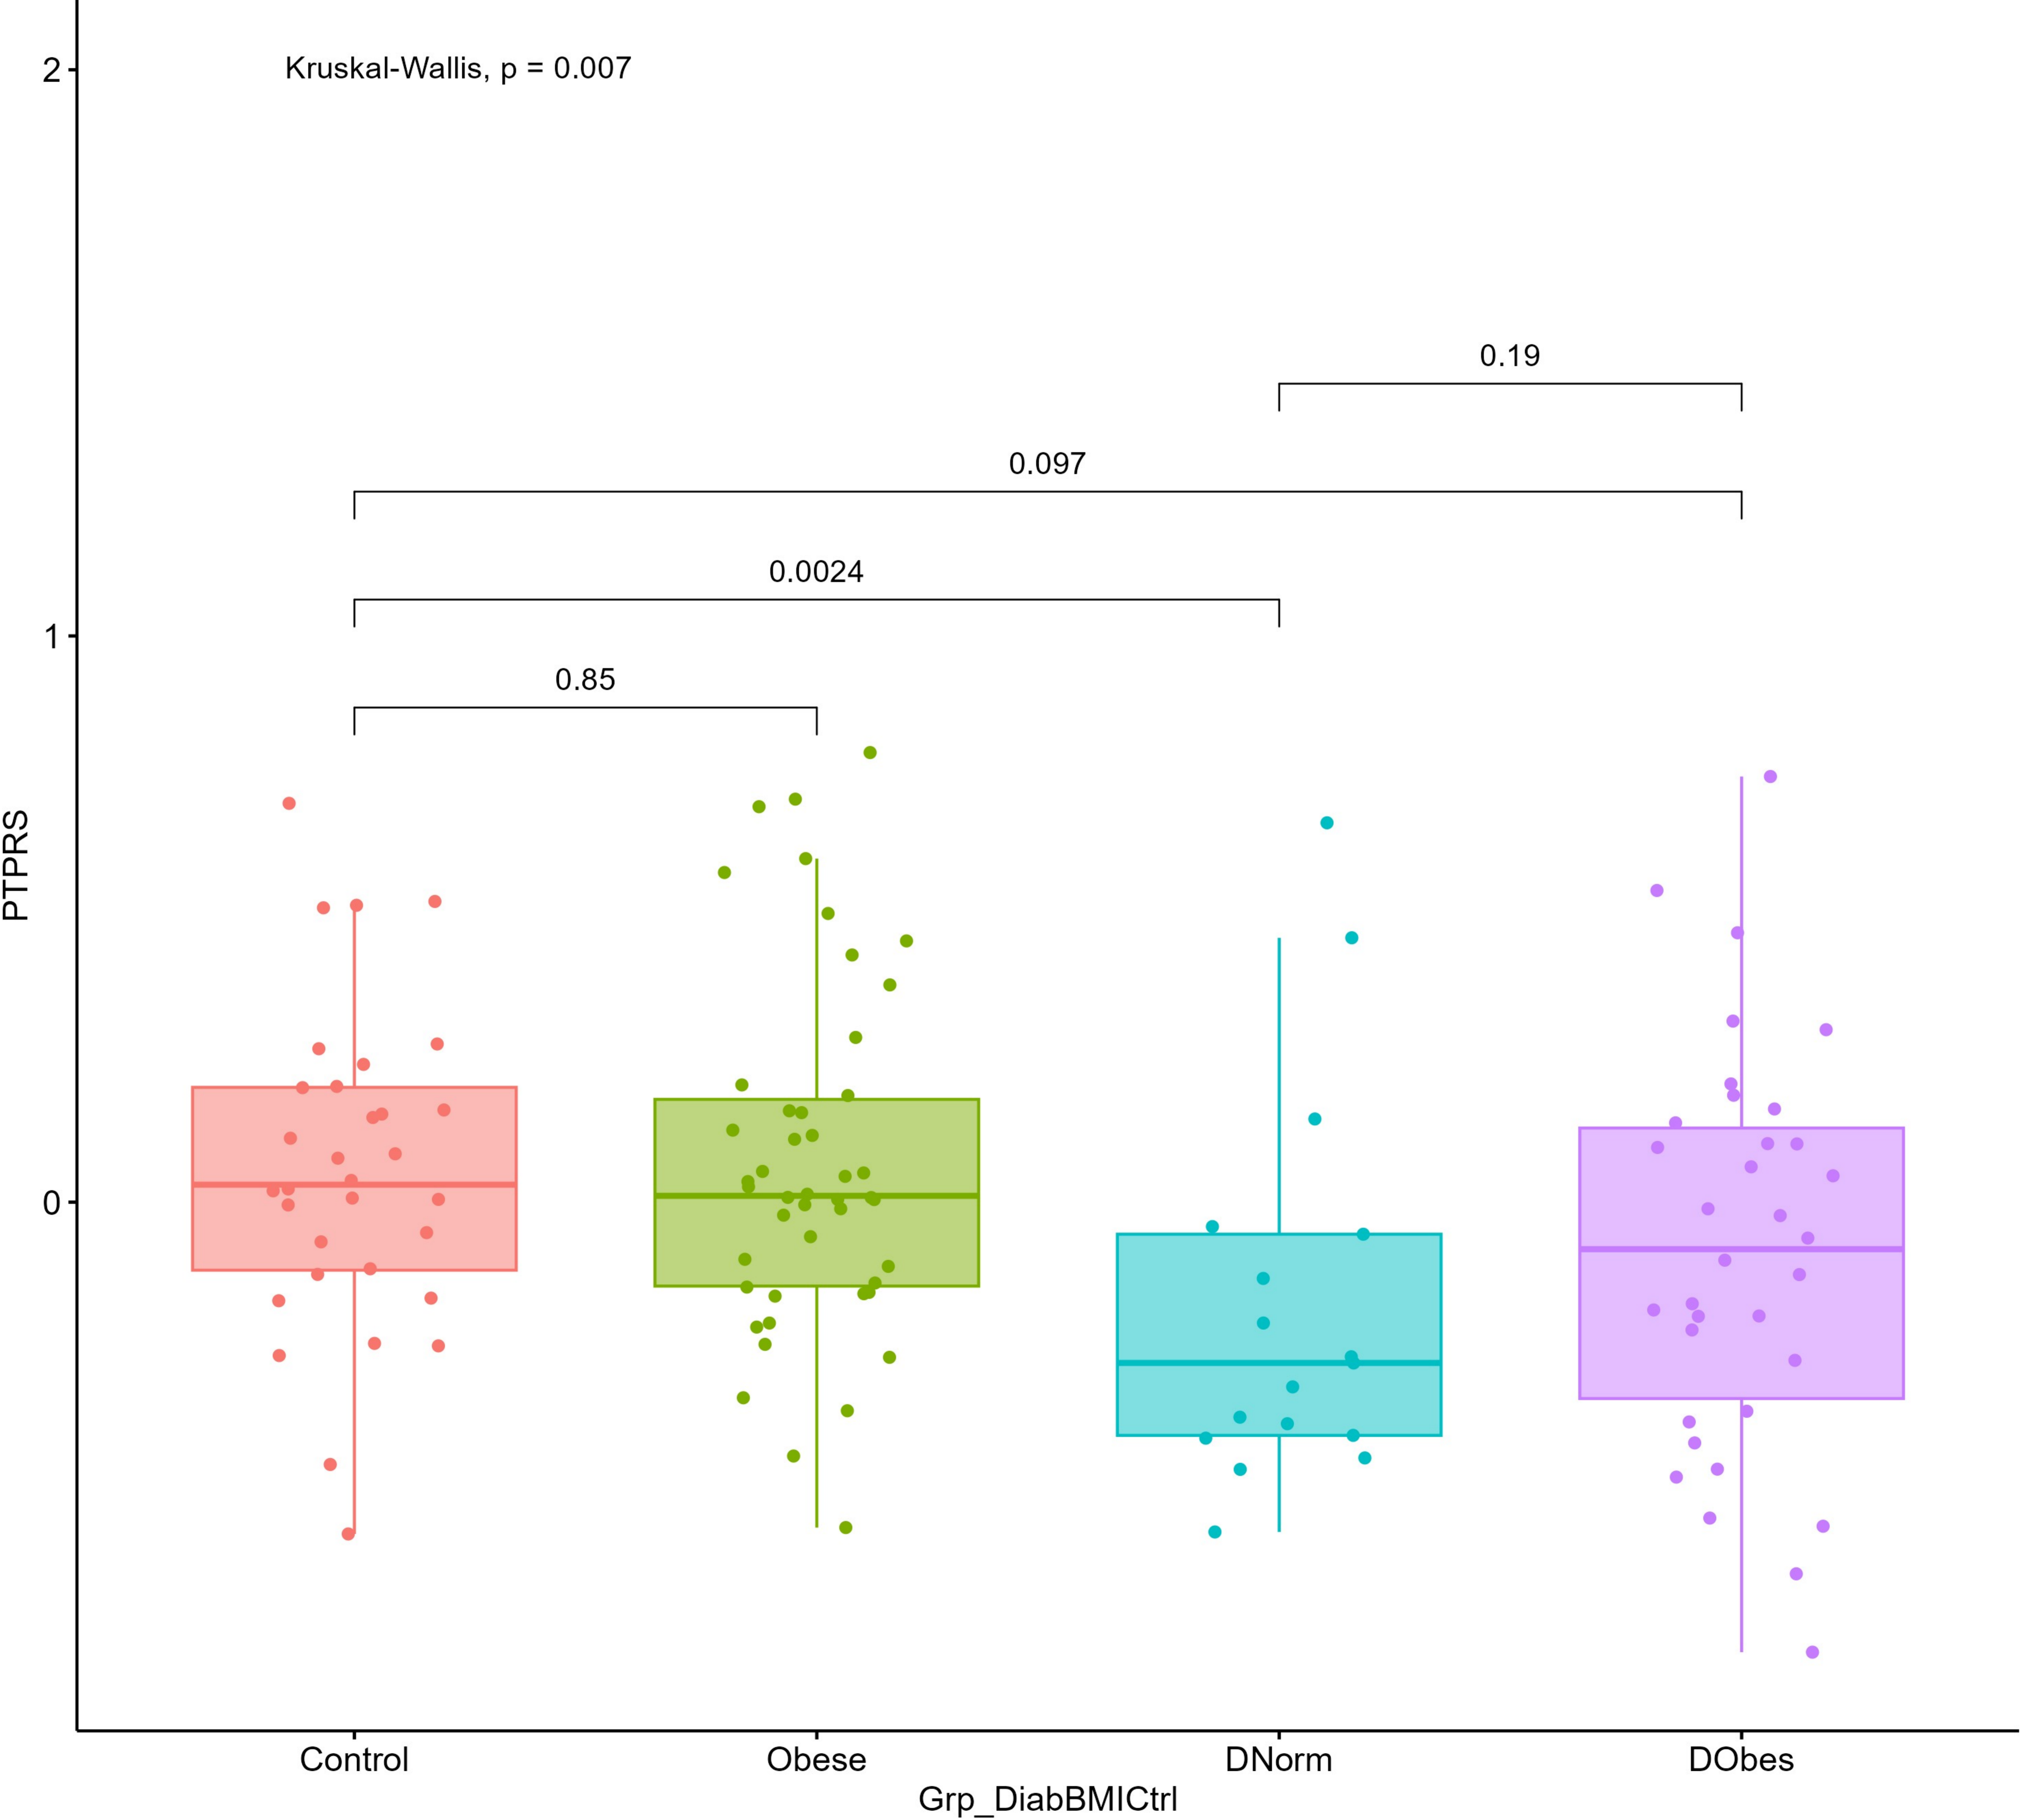

# Grp\_DiabBMICtrl

Grp\_DiabBMICtrl Control Obese DNorm DObes

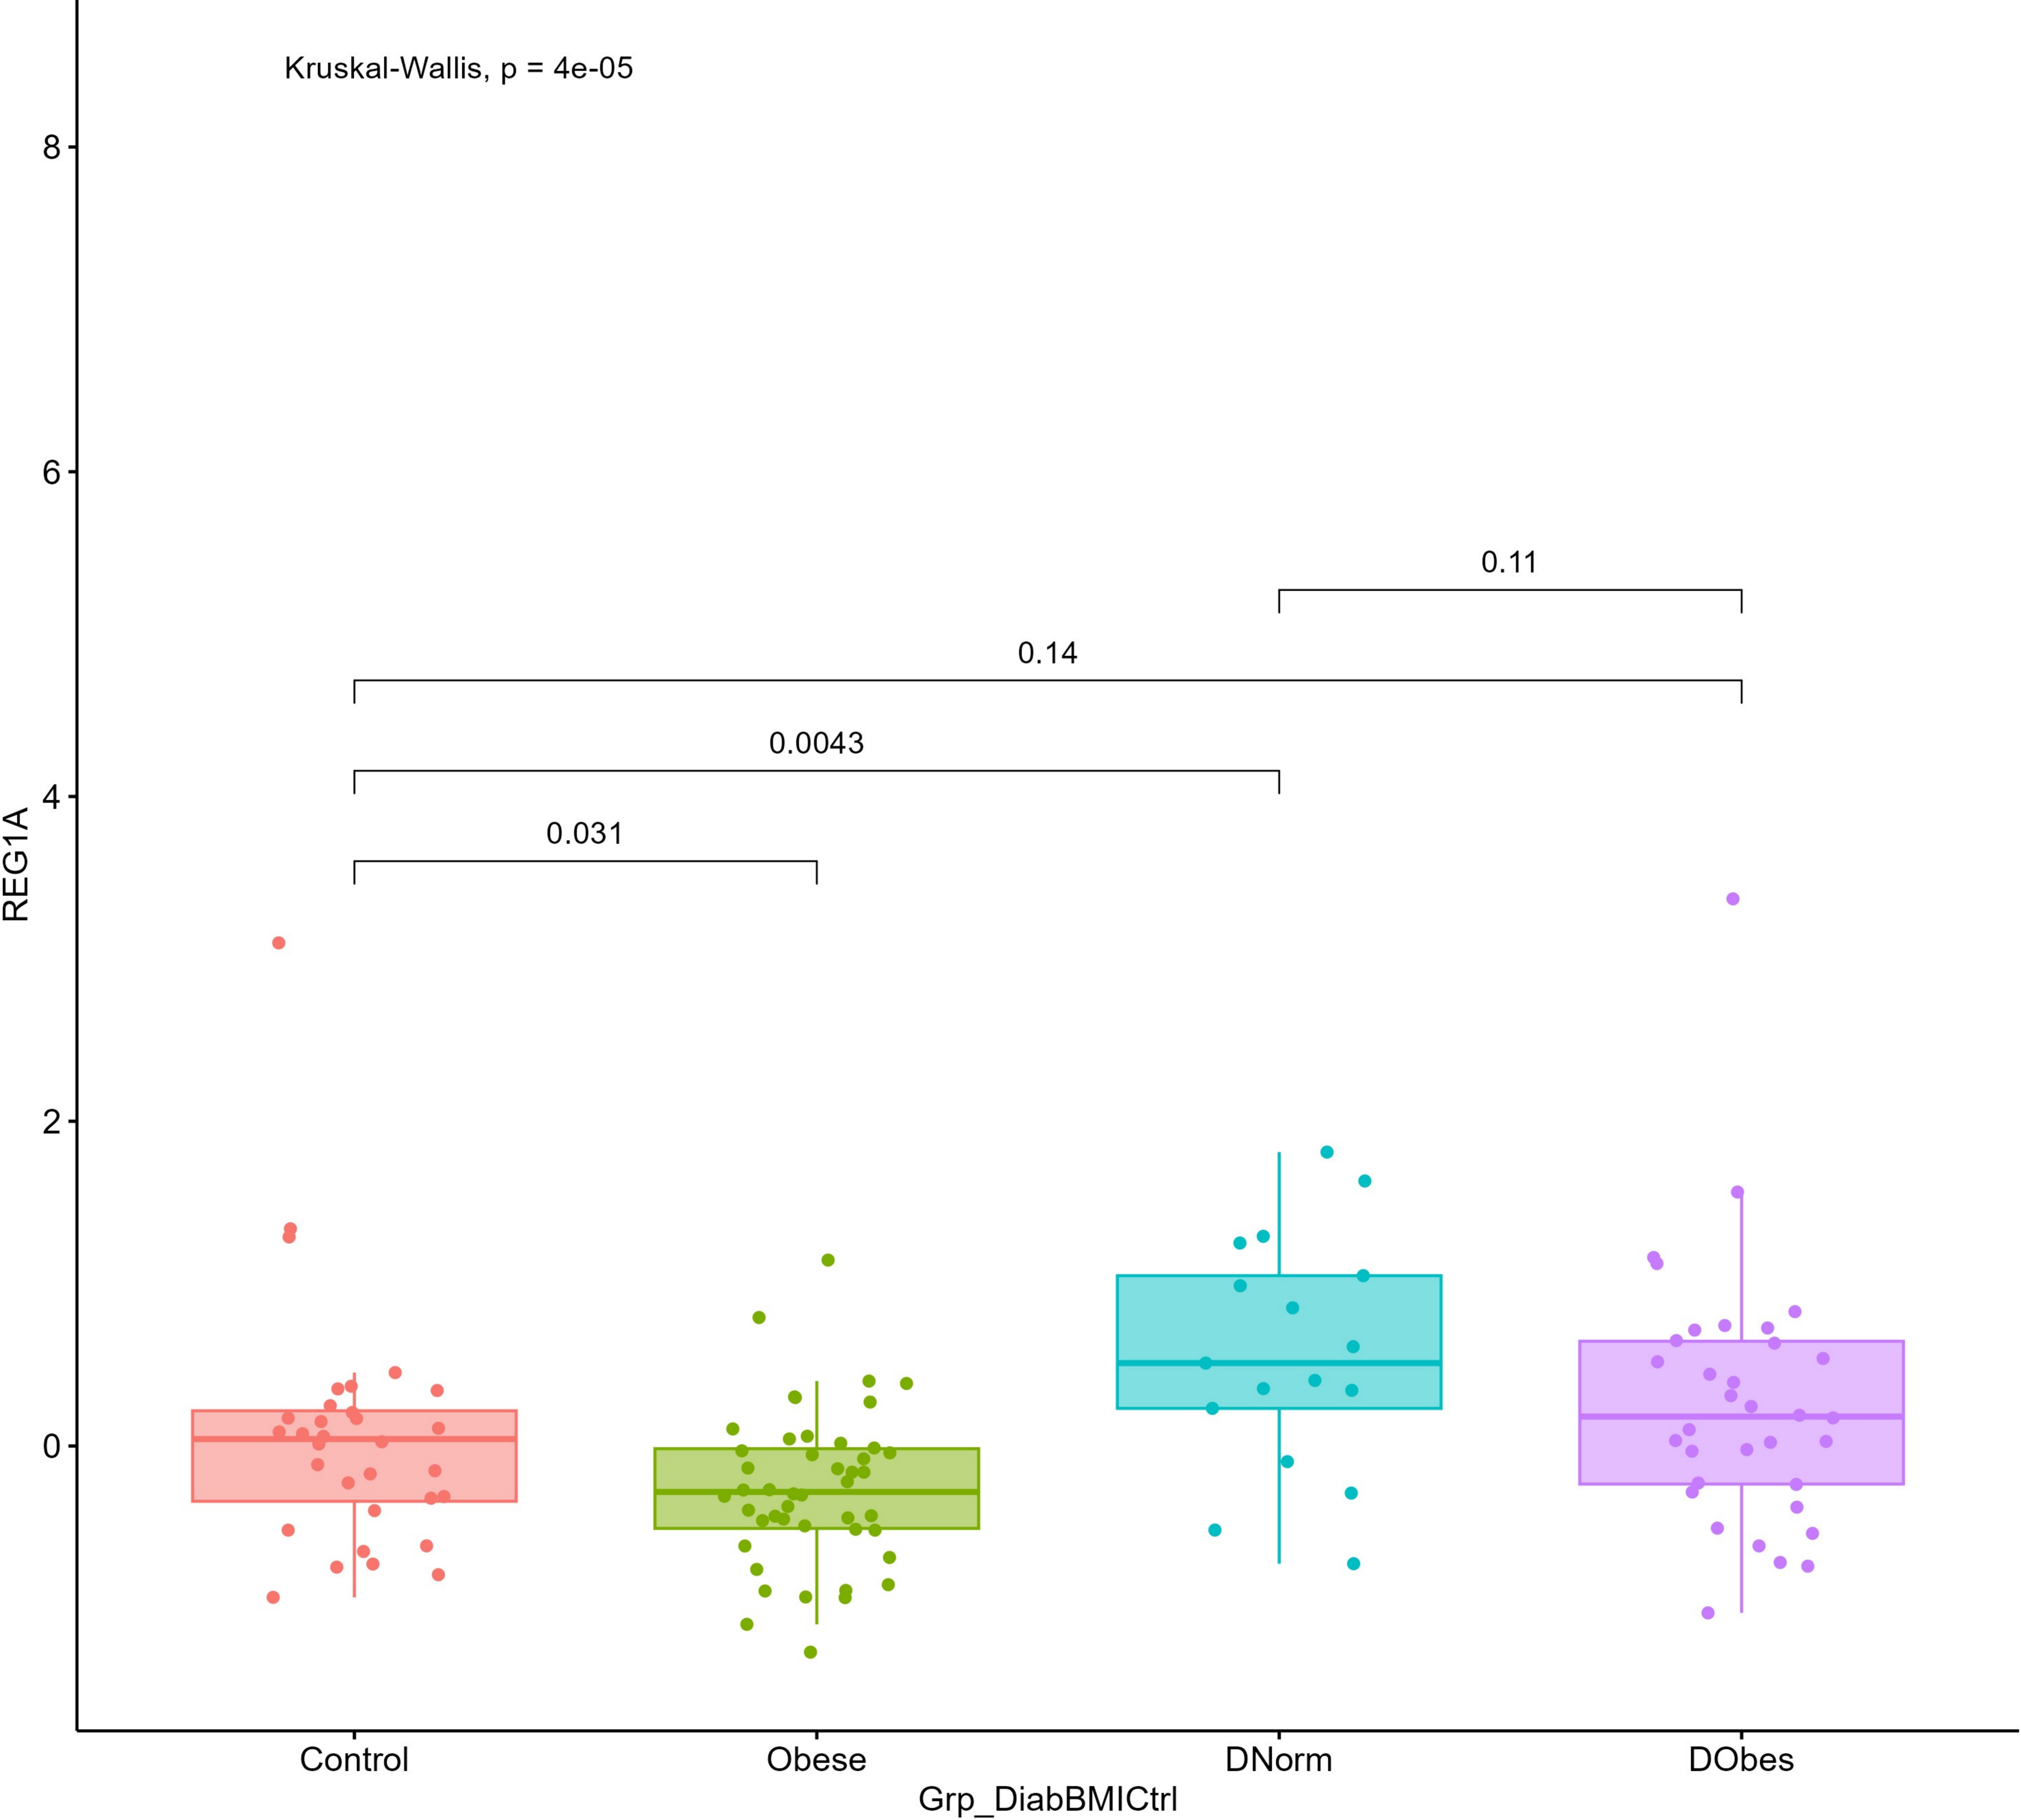

# Grp\_DiabBMICtrl

Grp\_DiabBMICtrl Control Obese DNorm DObes

Kruskal-Wallis,  $p = 5.1 \times 10^{-5}$

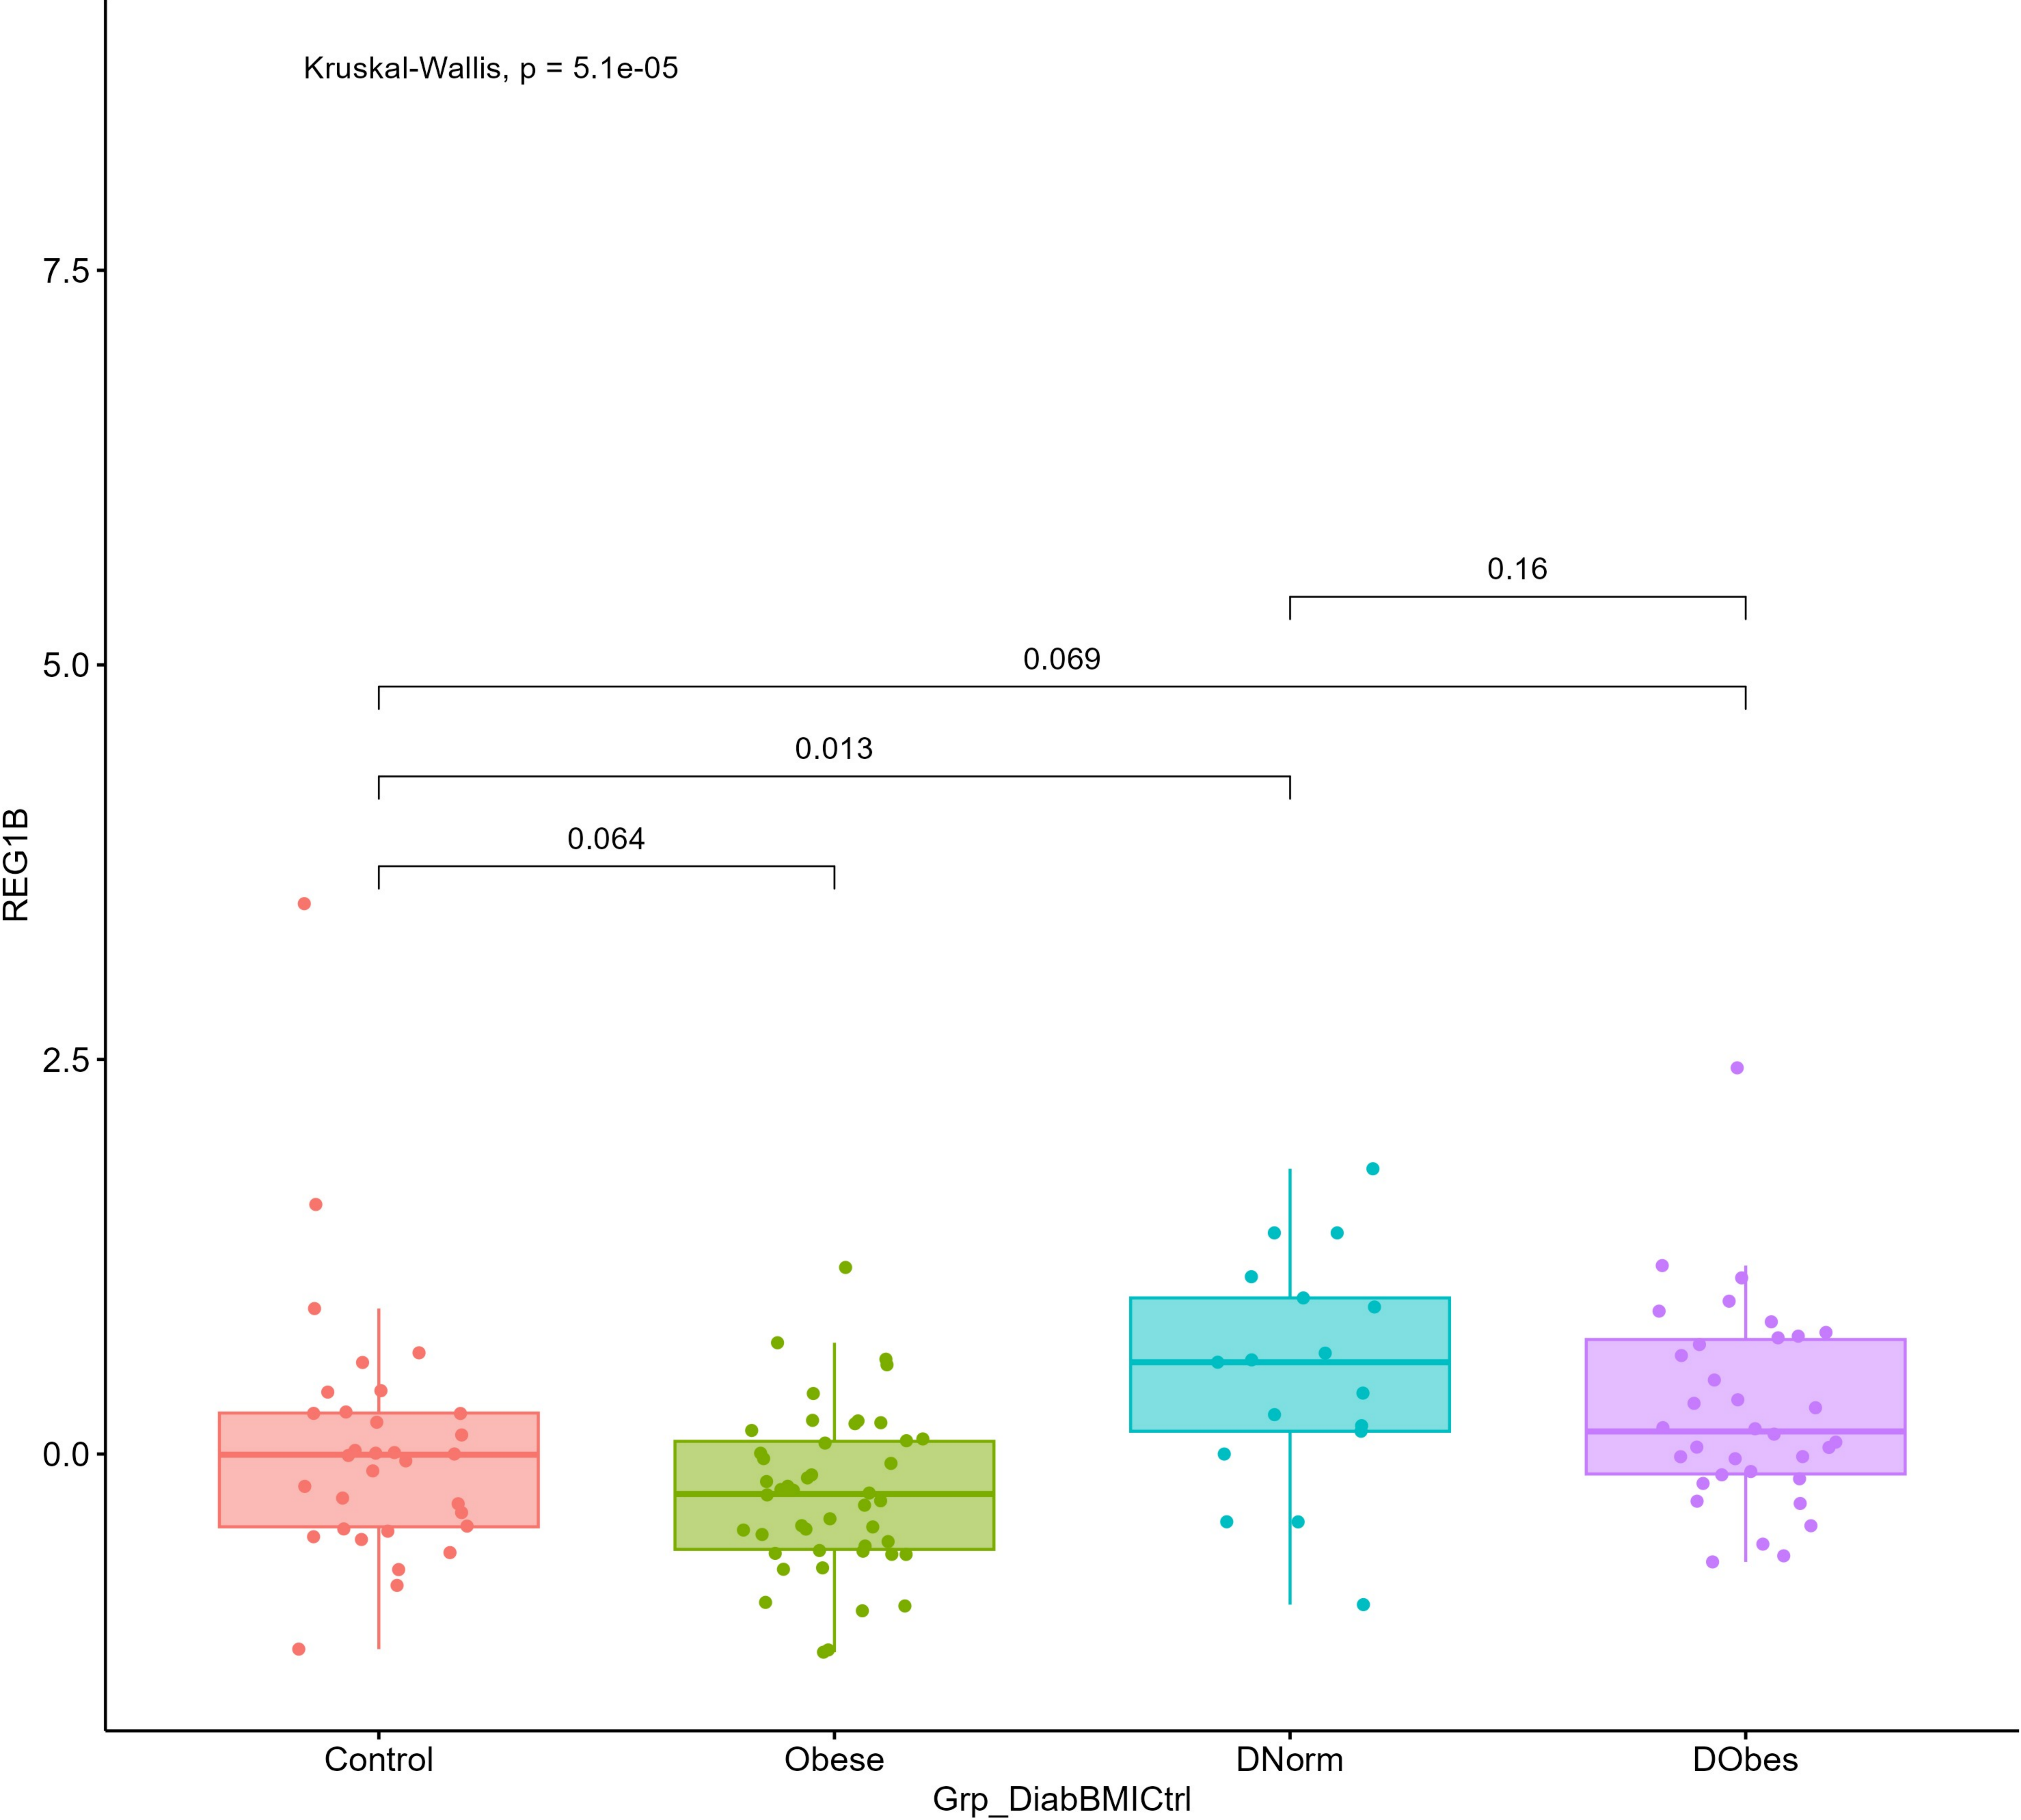

# Grp\_DiabBMICtrl

Grp\_DiabBMICtrl Control Obese DNorm DObes

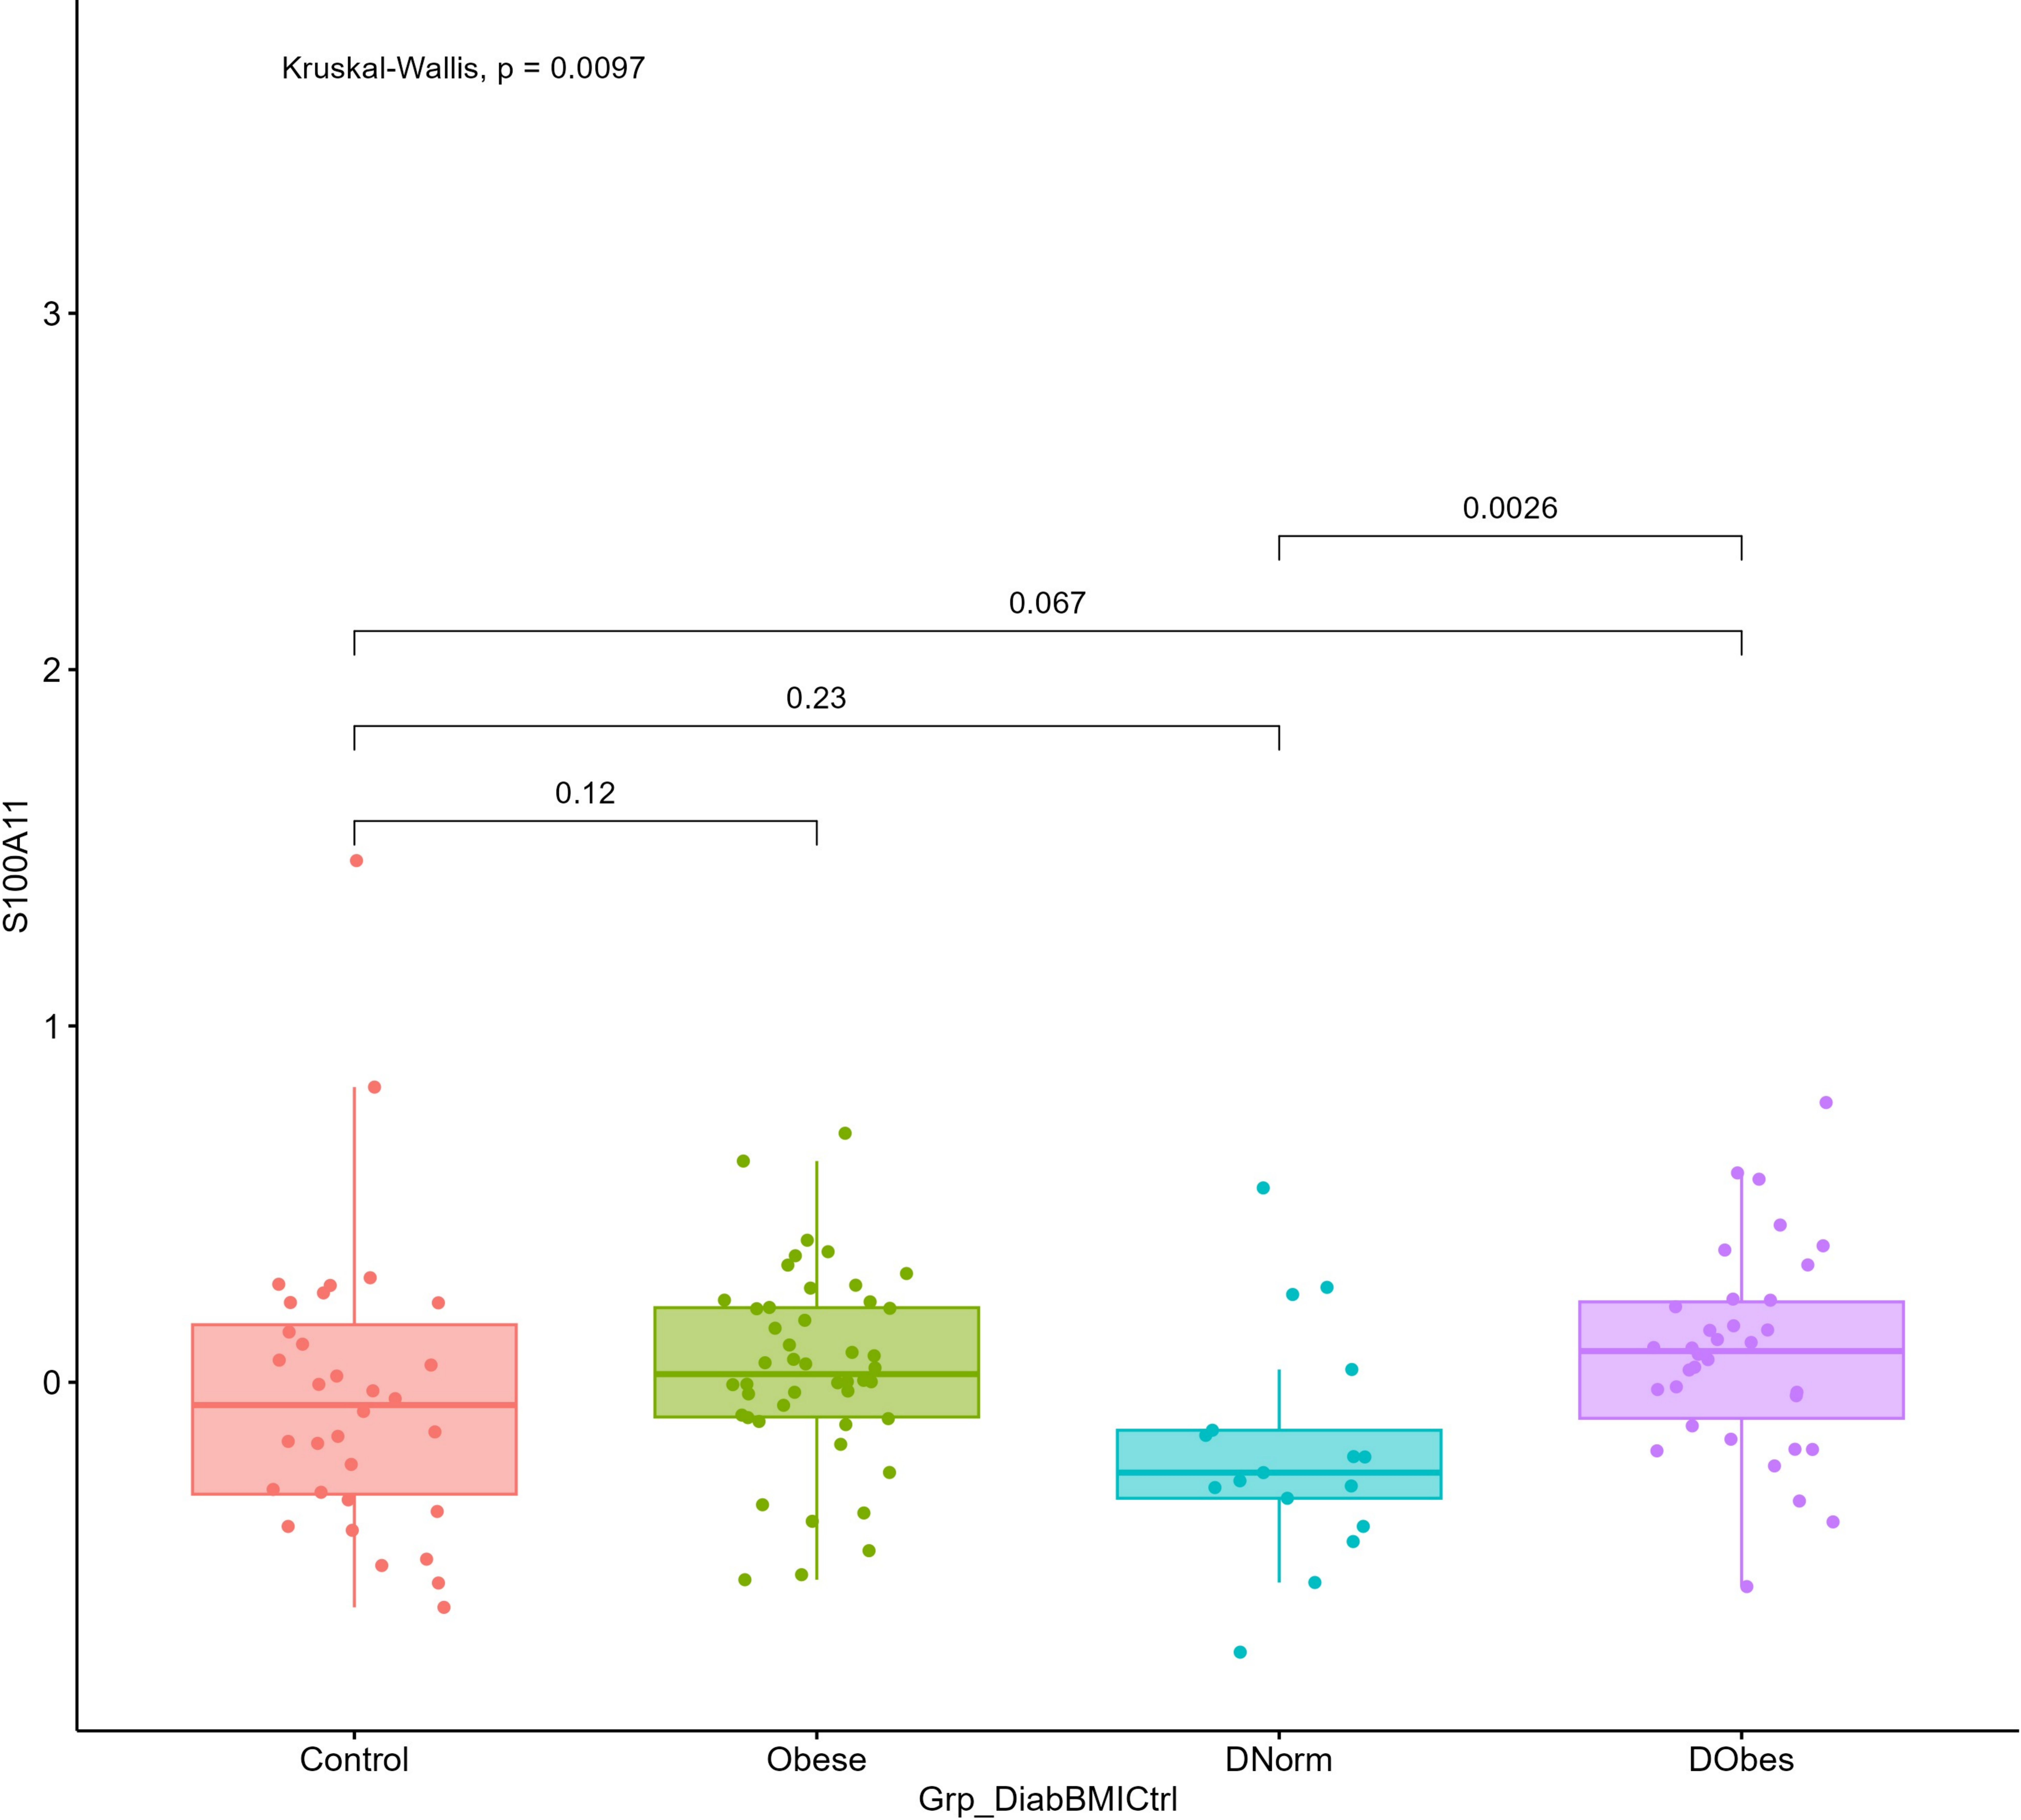

# Grp\_DiabBMICtrl

Grp\_DiabBMICtrl Control Obese DNorm DObes

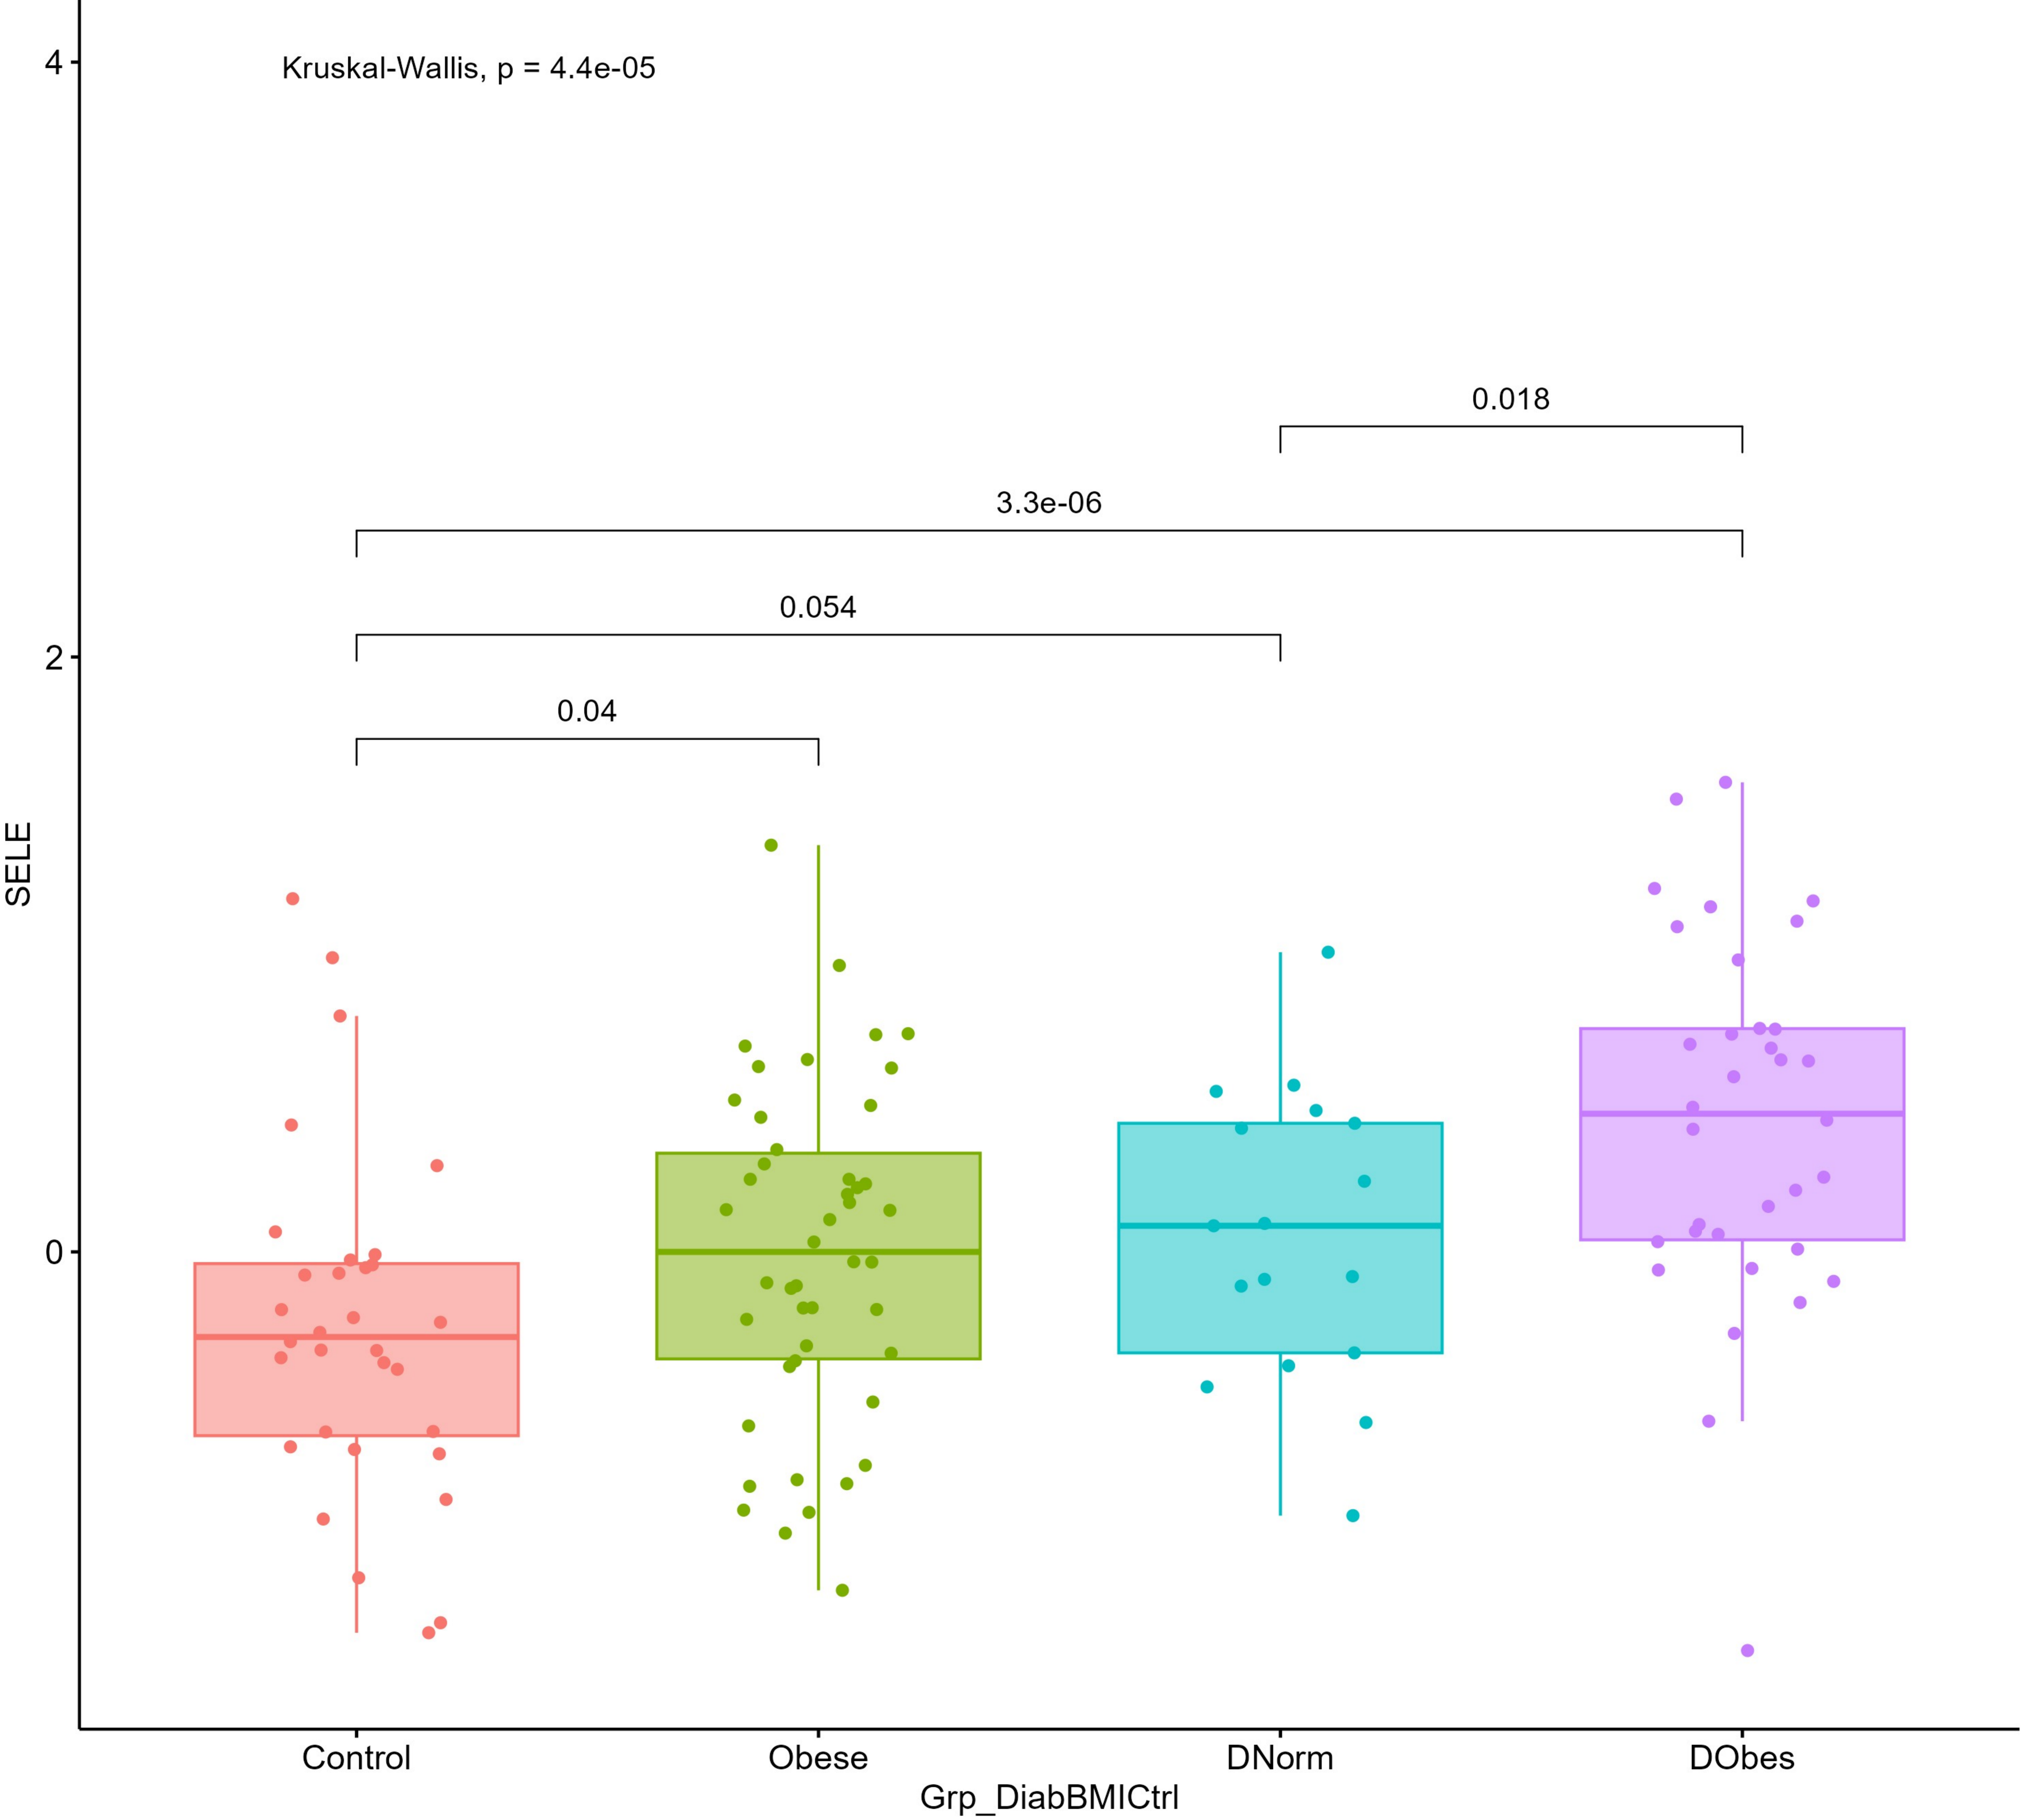

# Grp\_DiabBMICtrl

Grp\_DiabBMICtrl Control Obese DNorm DObes

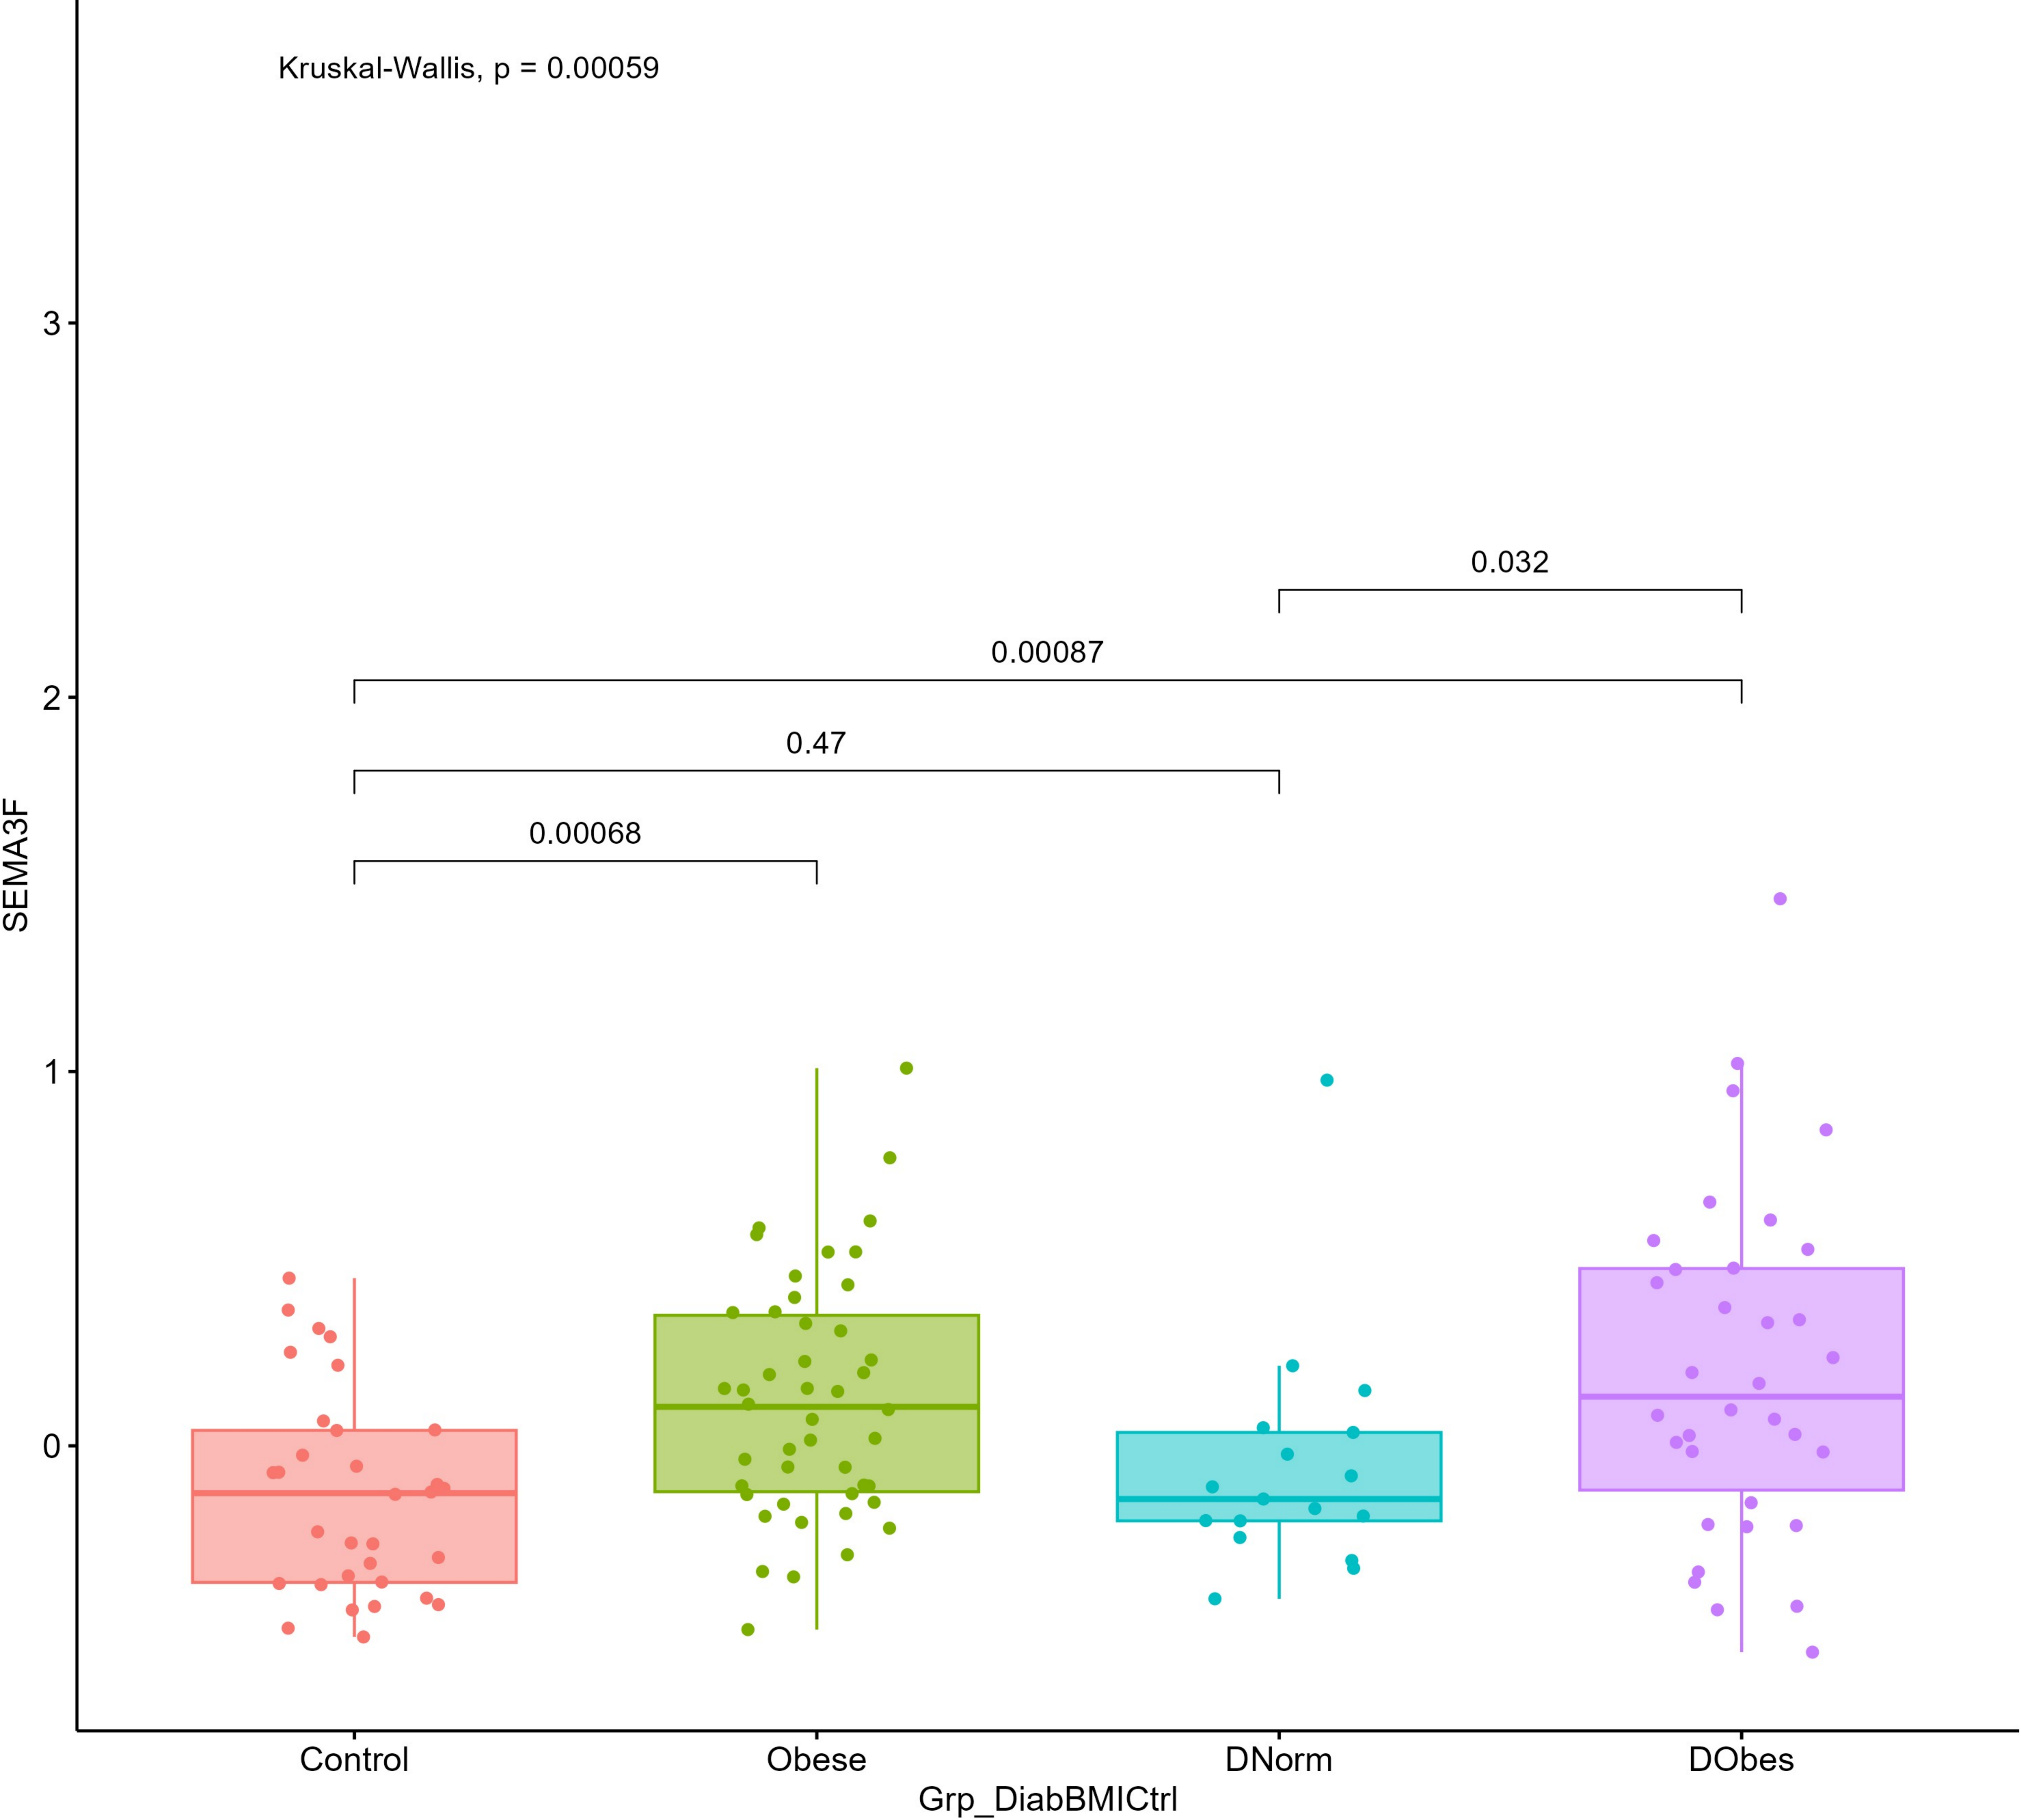

# Grp\_DiabBMICtrl

Grp\_DiabBMICtrl Control Obese DNorm DObes

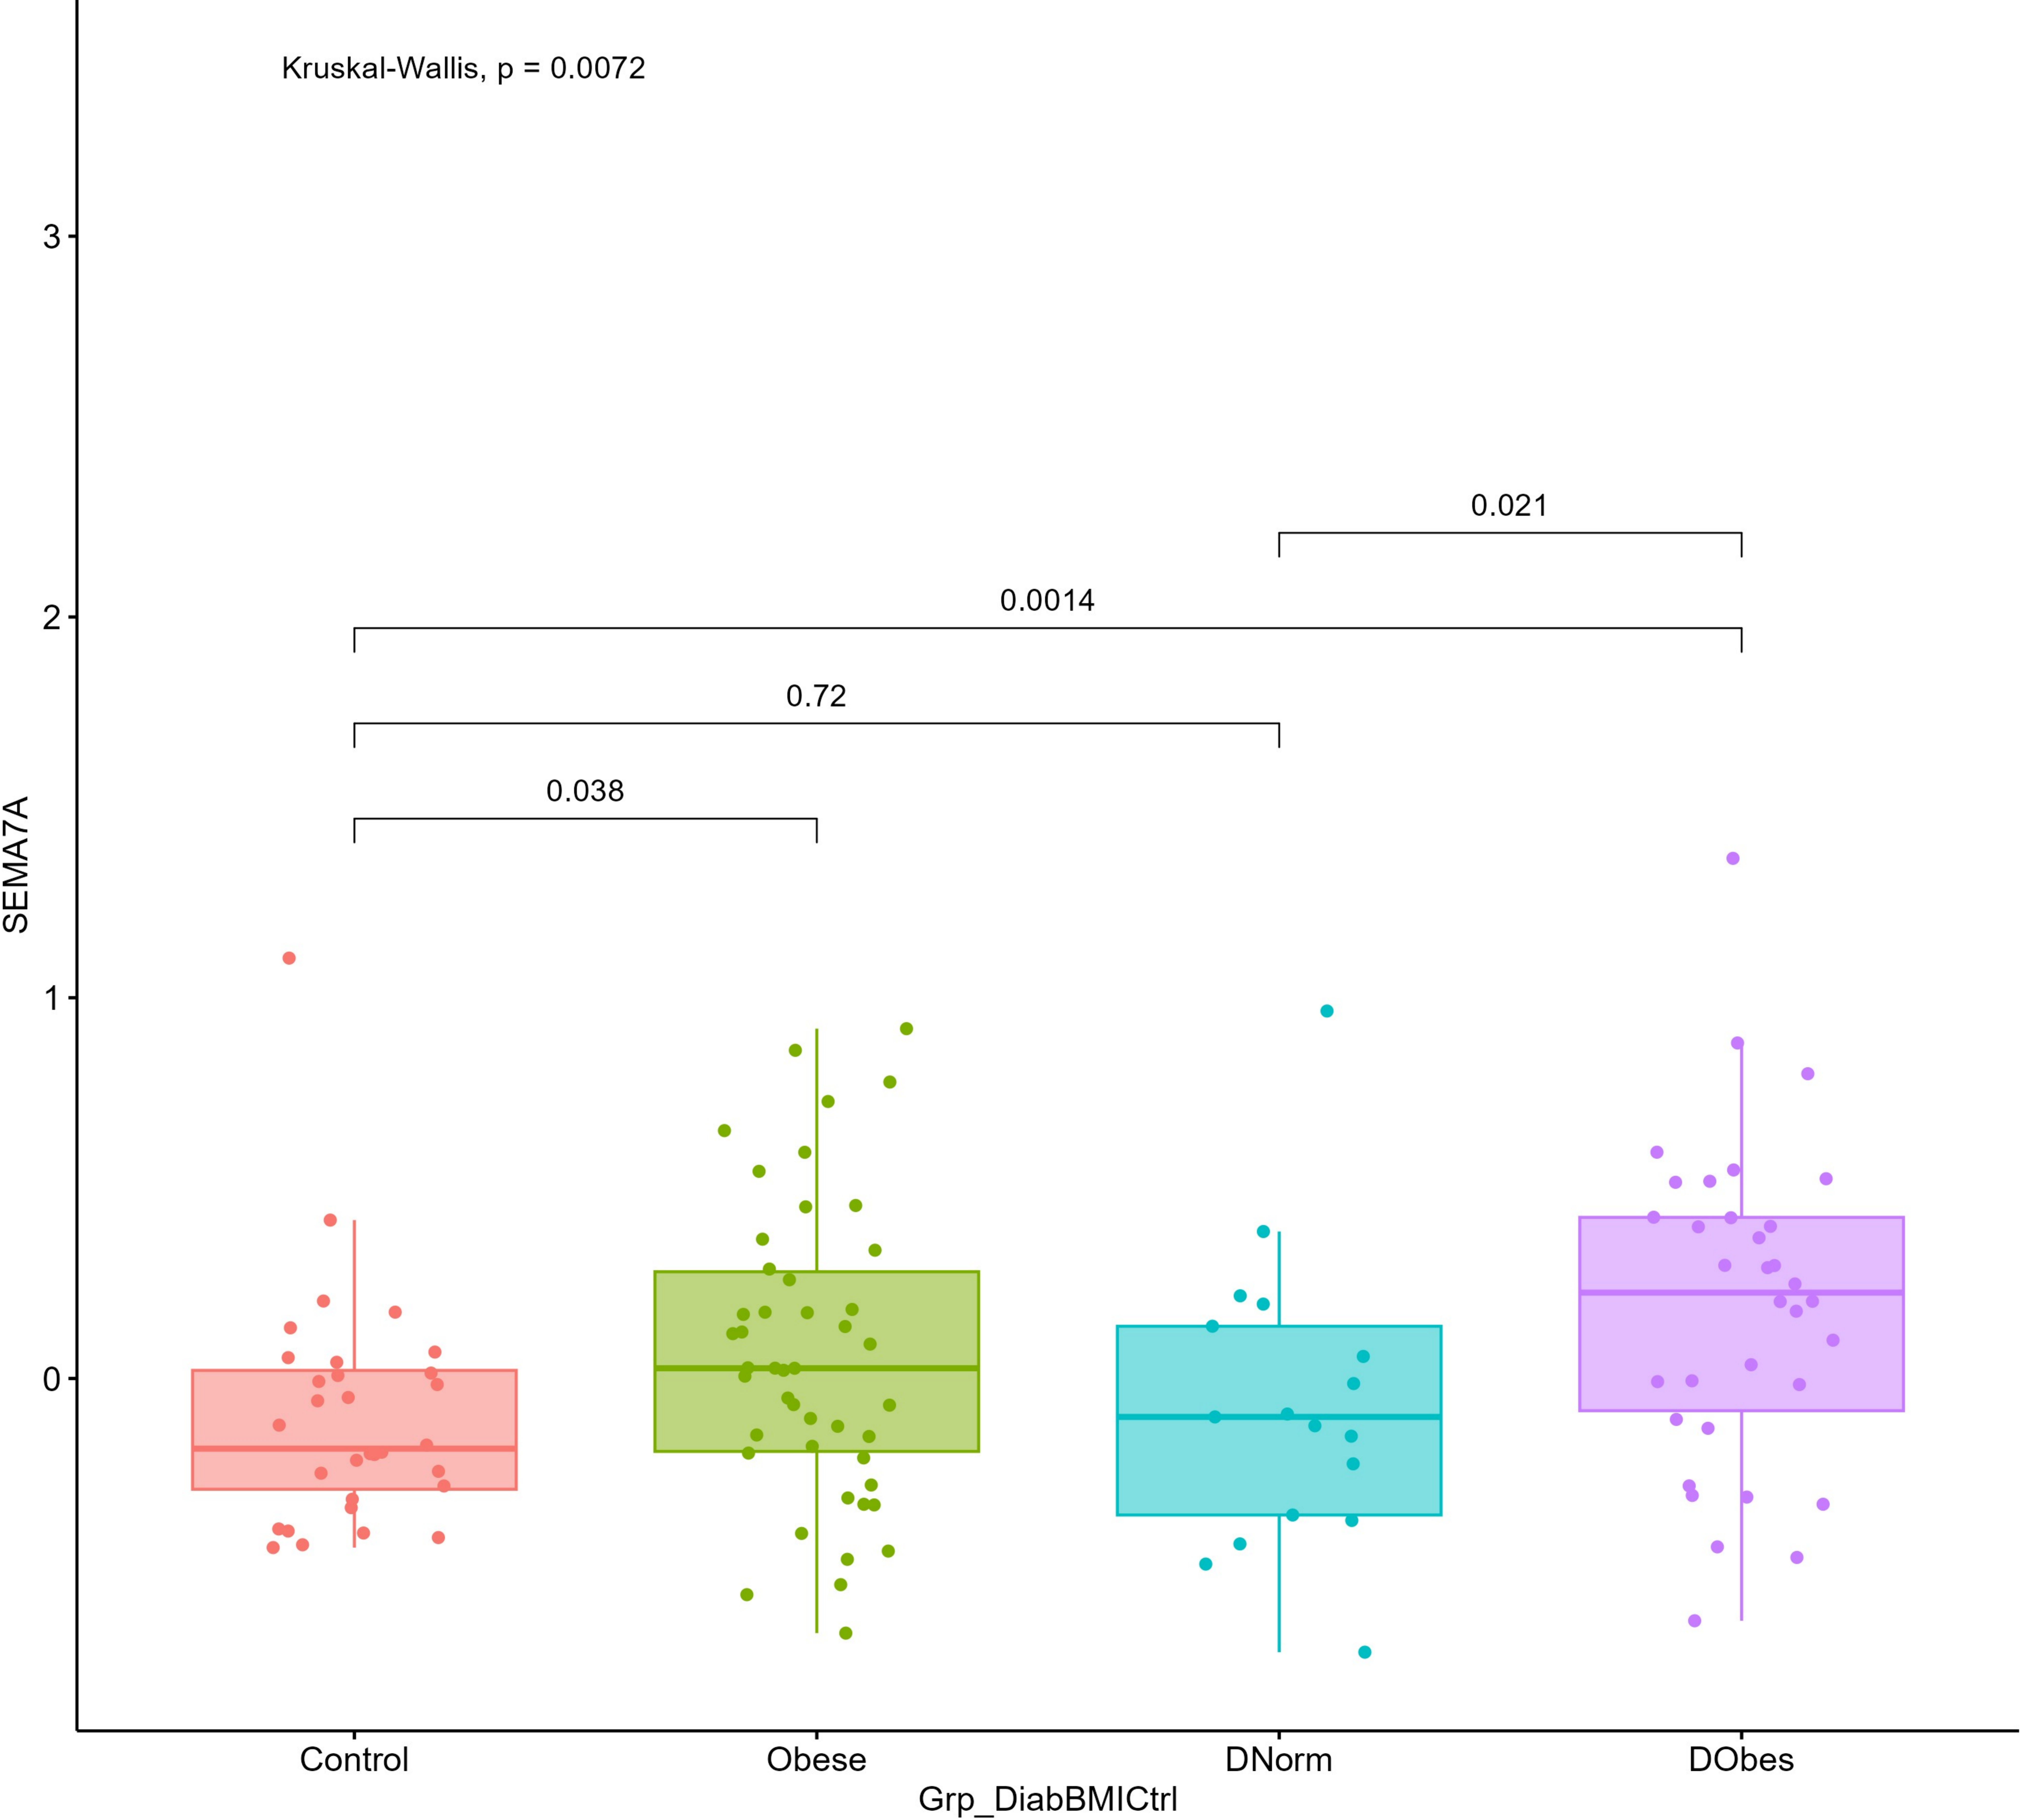

# Grp\_DiabBMICtrl

Grp\_DiabBMICtrl Control Obese DNorm DObes

Kruskal-Wallis, p = 0.0042

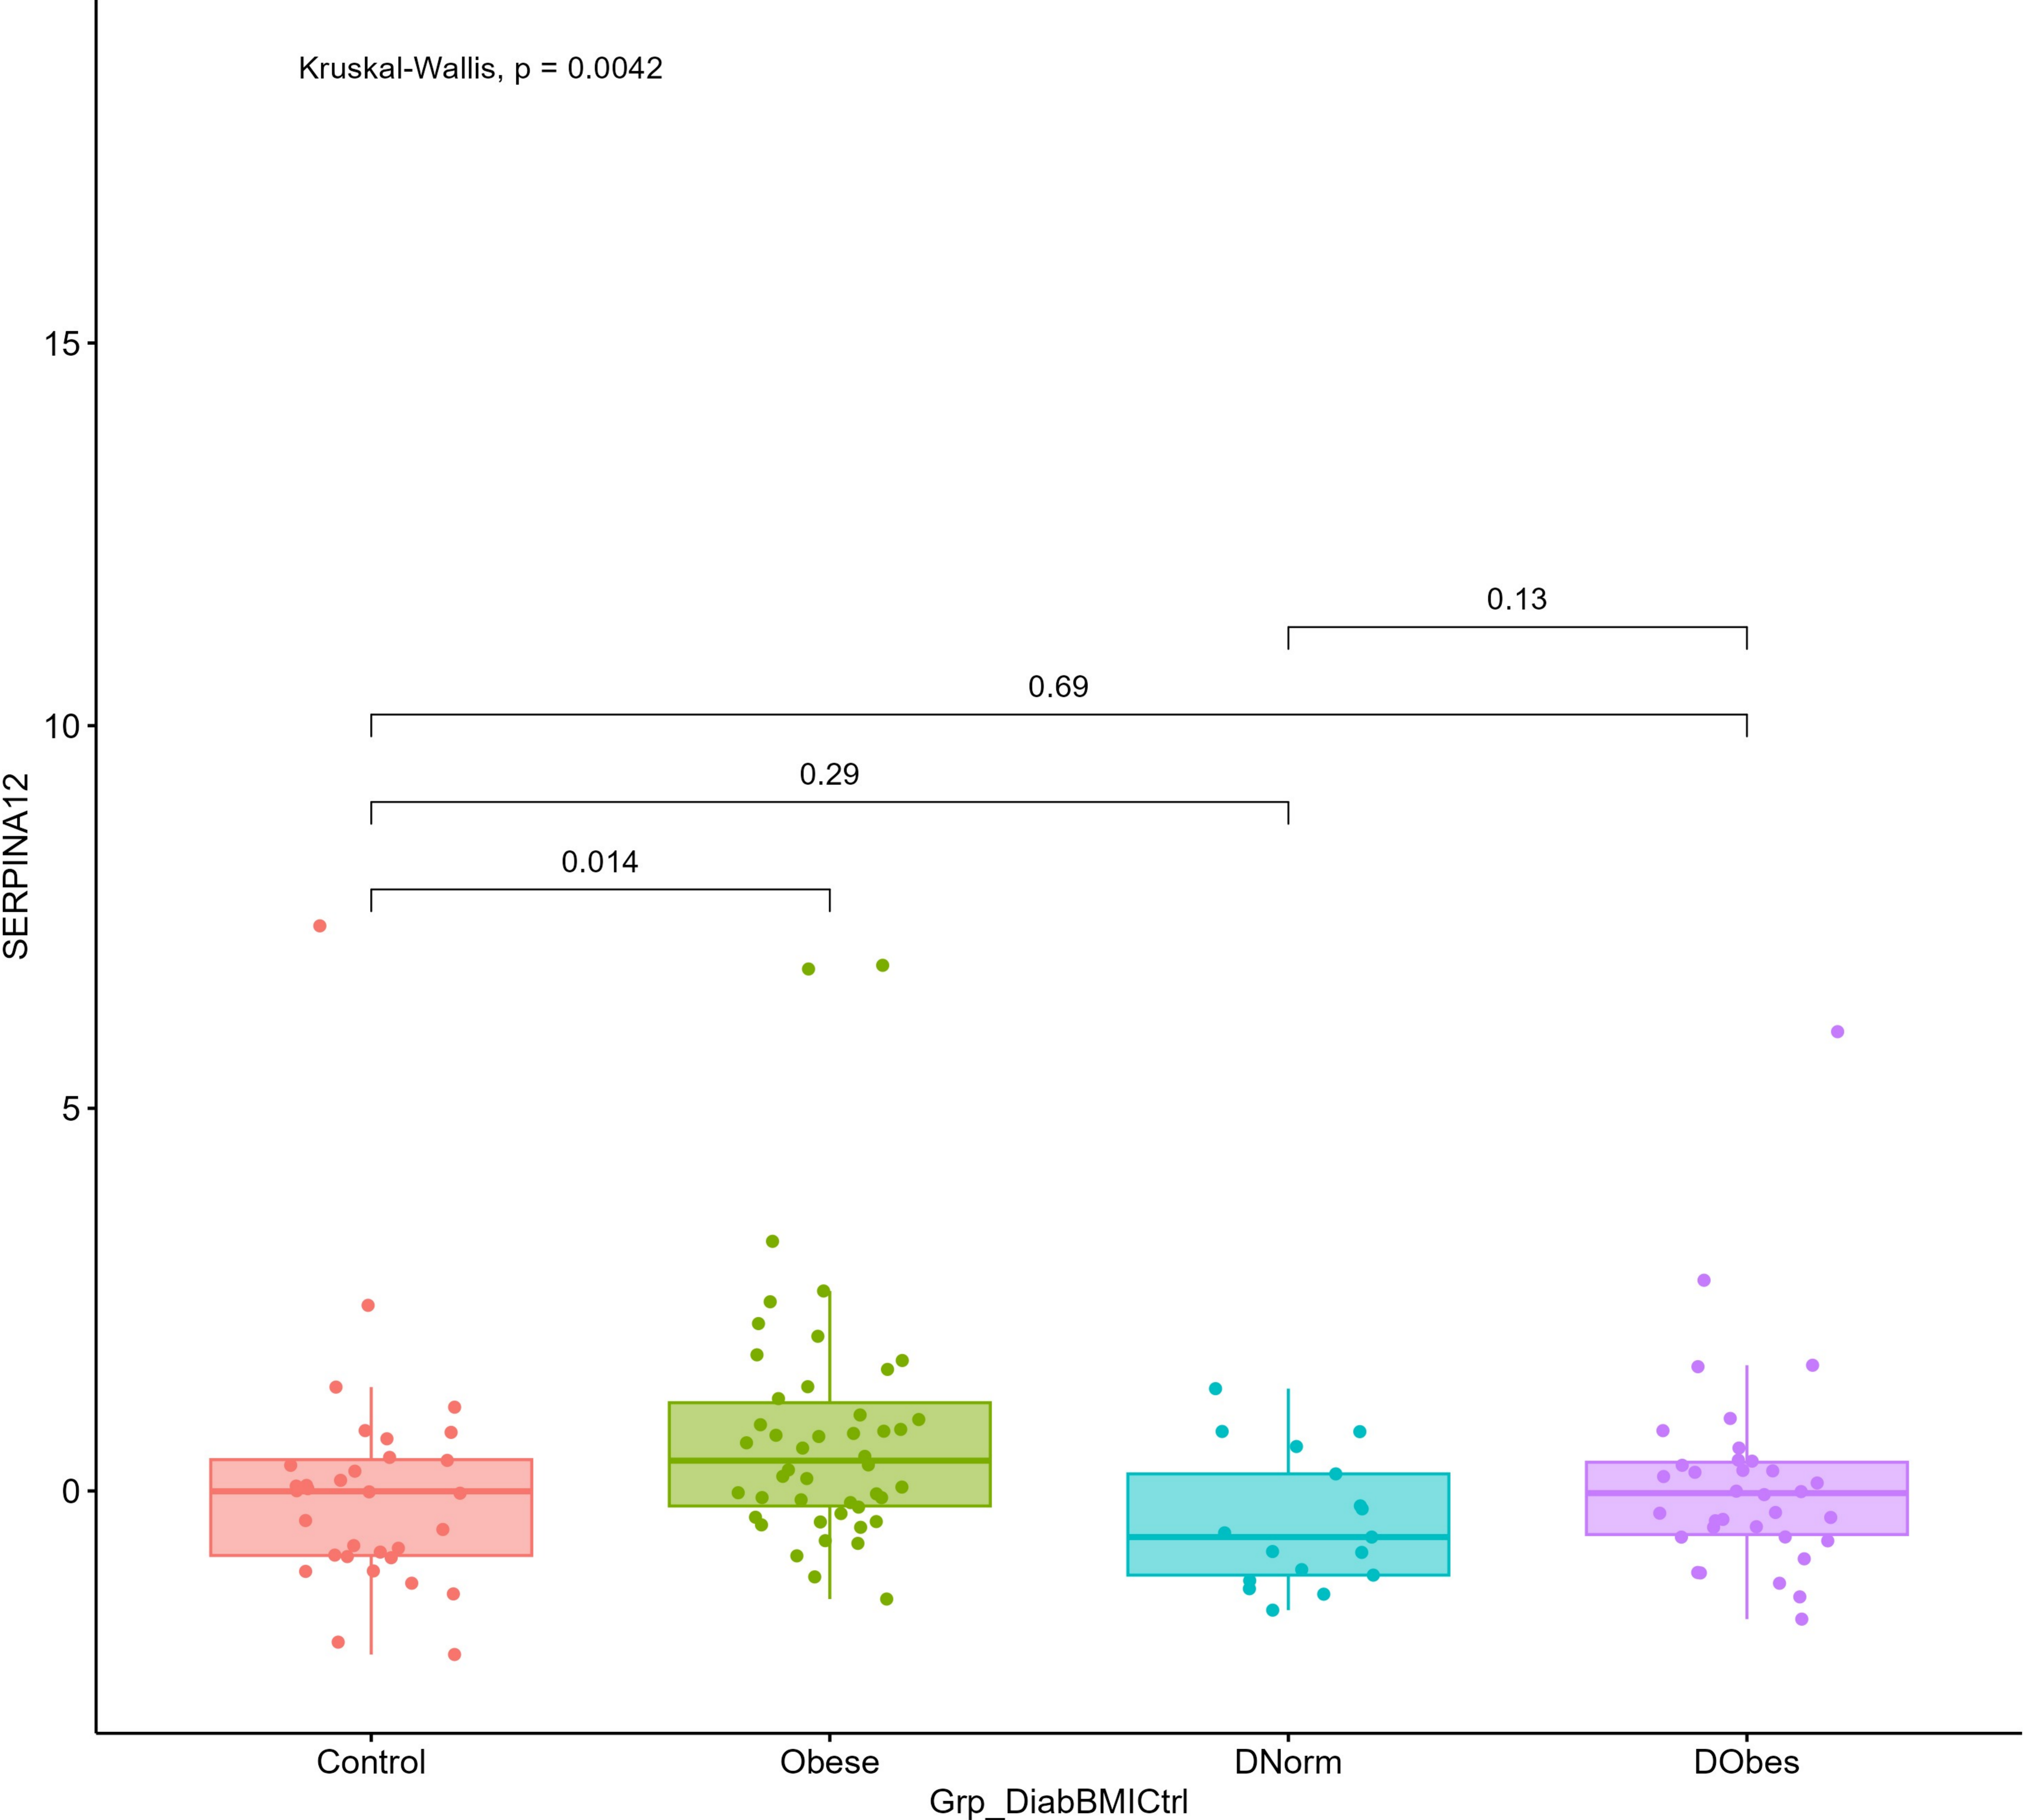

# Grp\_DiabBMICtrl

Grp\_DiabBMICtrl Control Obese DNorm DObes

Kruskal-Wallis, p = 1e-04

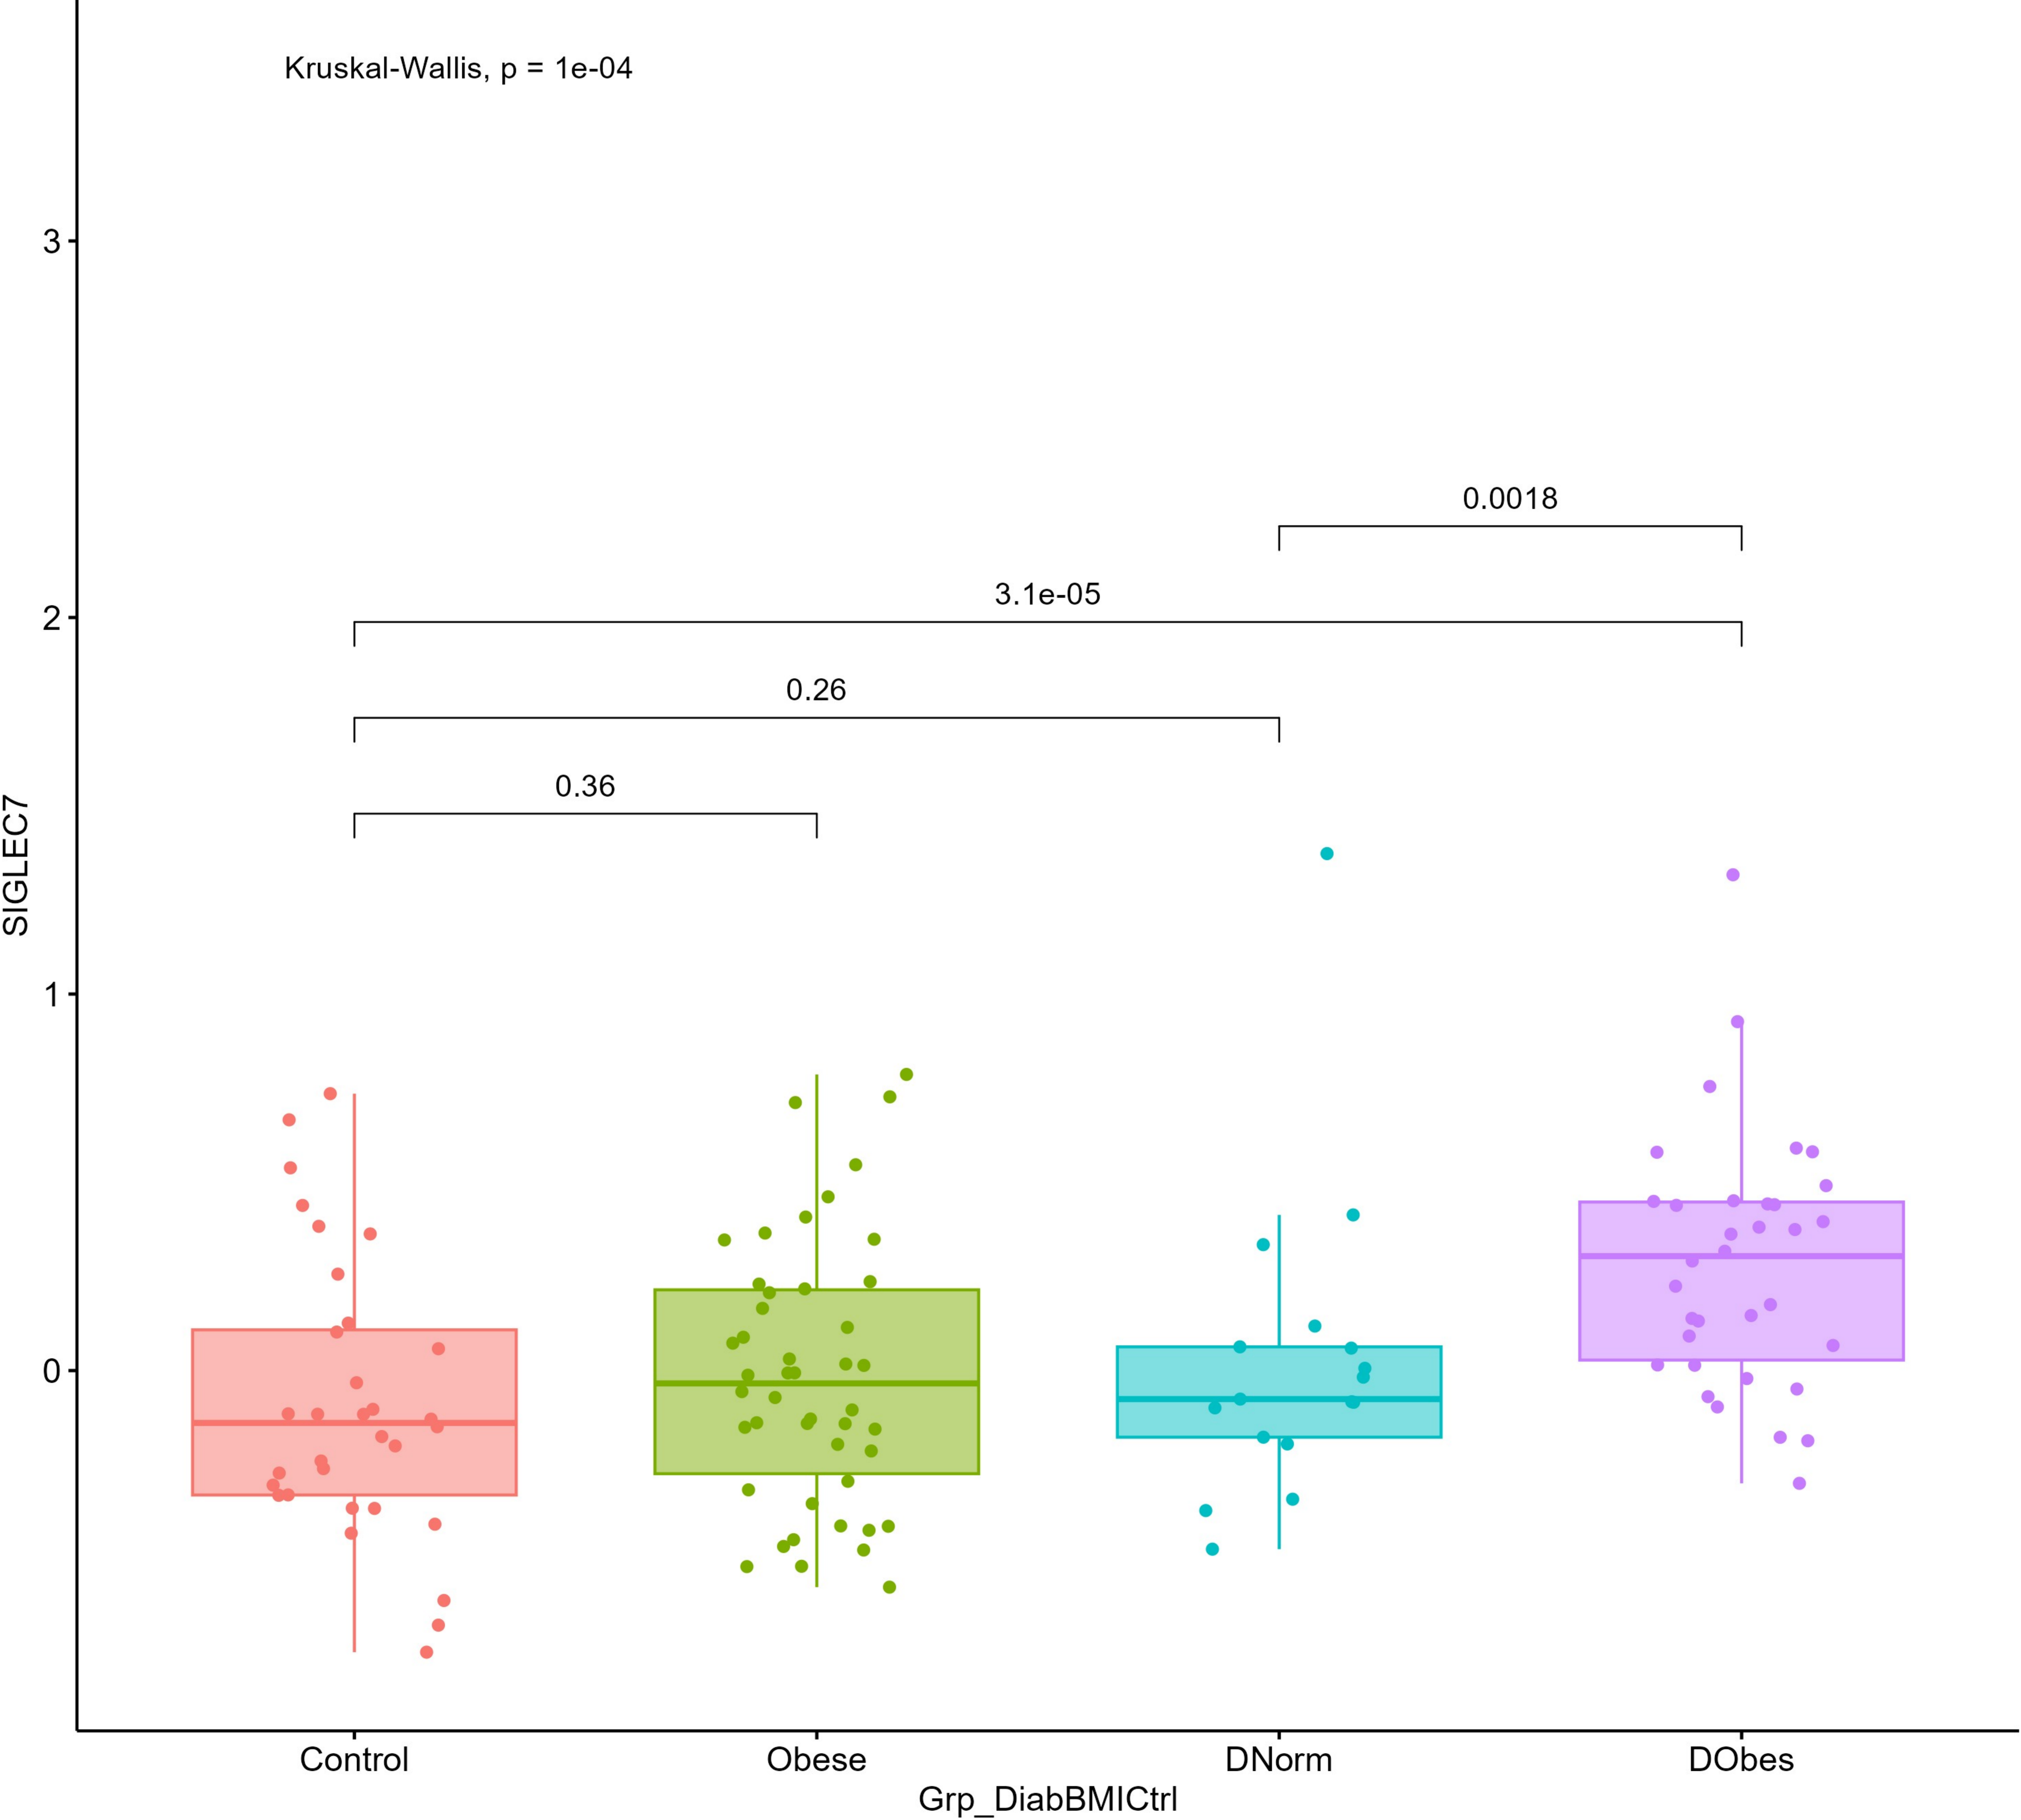

# Grp\_DiabBMICtrl

Grp\_DiabBMICtrl Control Obese DNorm DObes

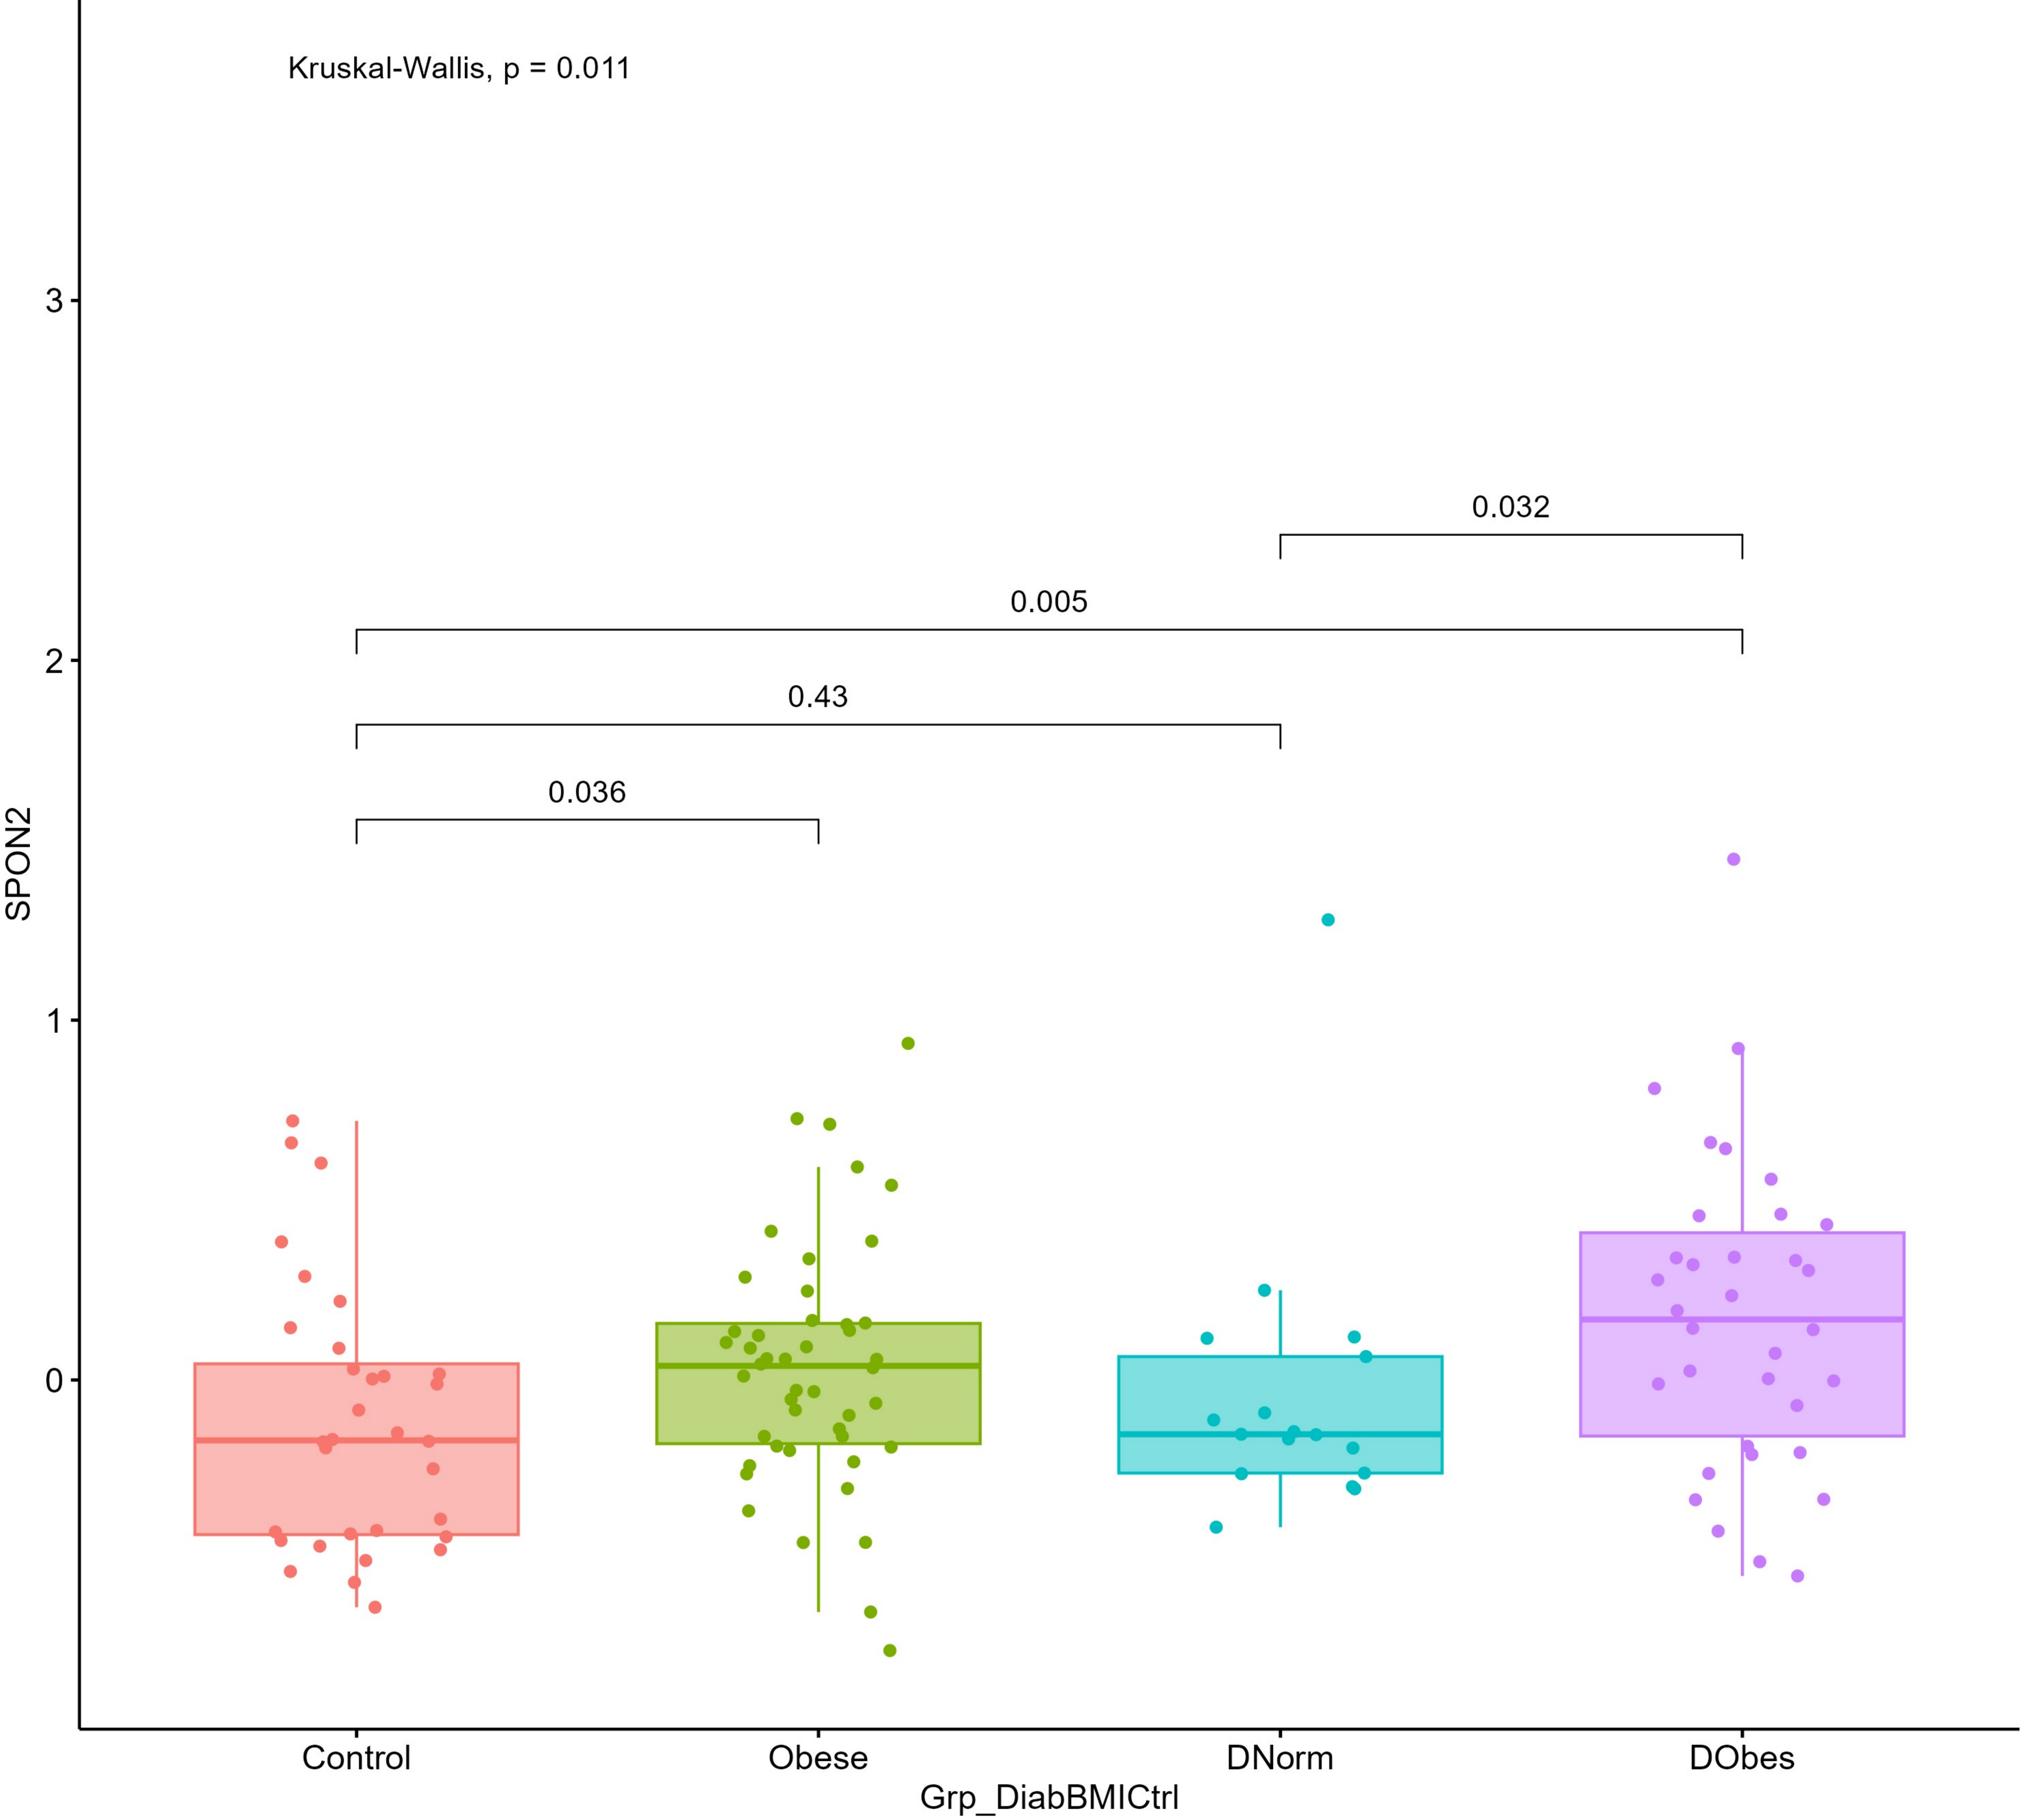

# Grp\_DiabBMICtrl

Grp\_DiabBMICtrl Control Obese DNorm DObes

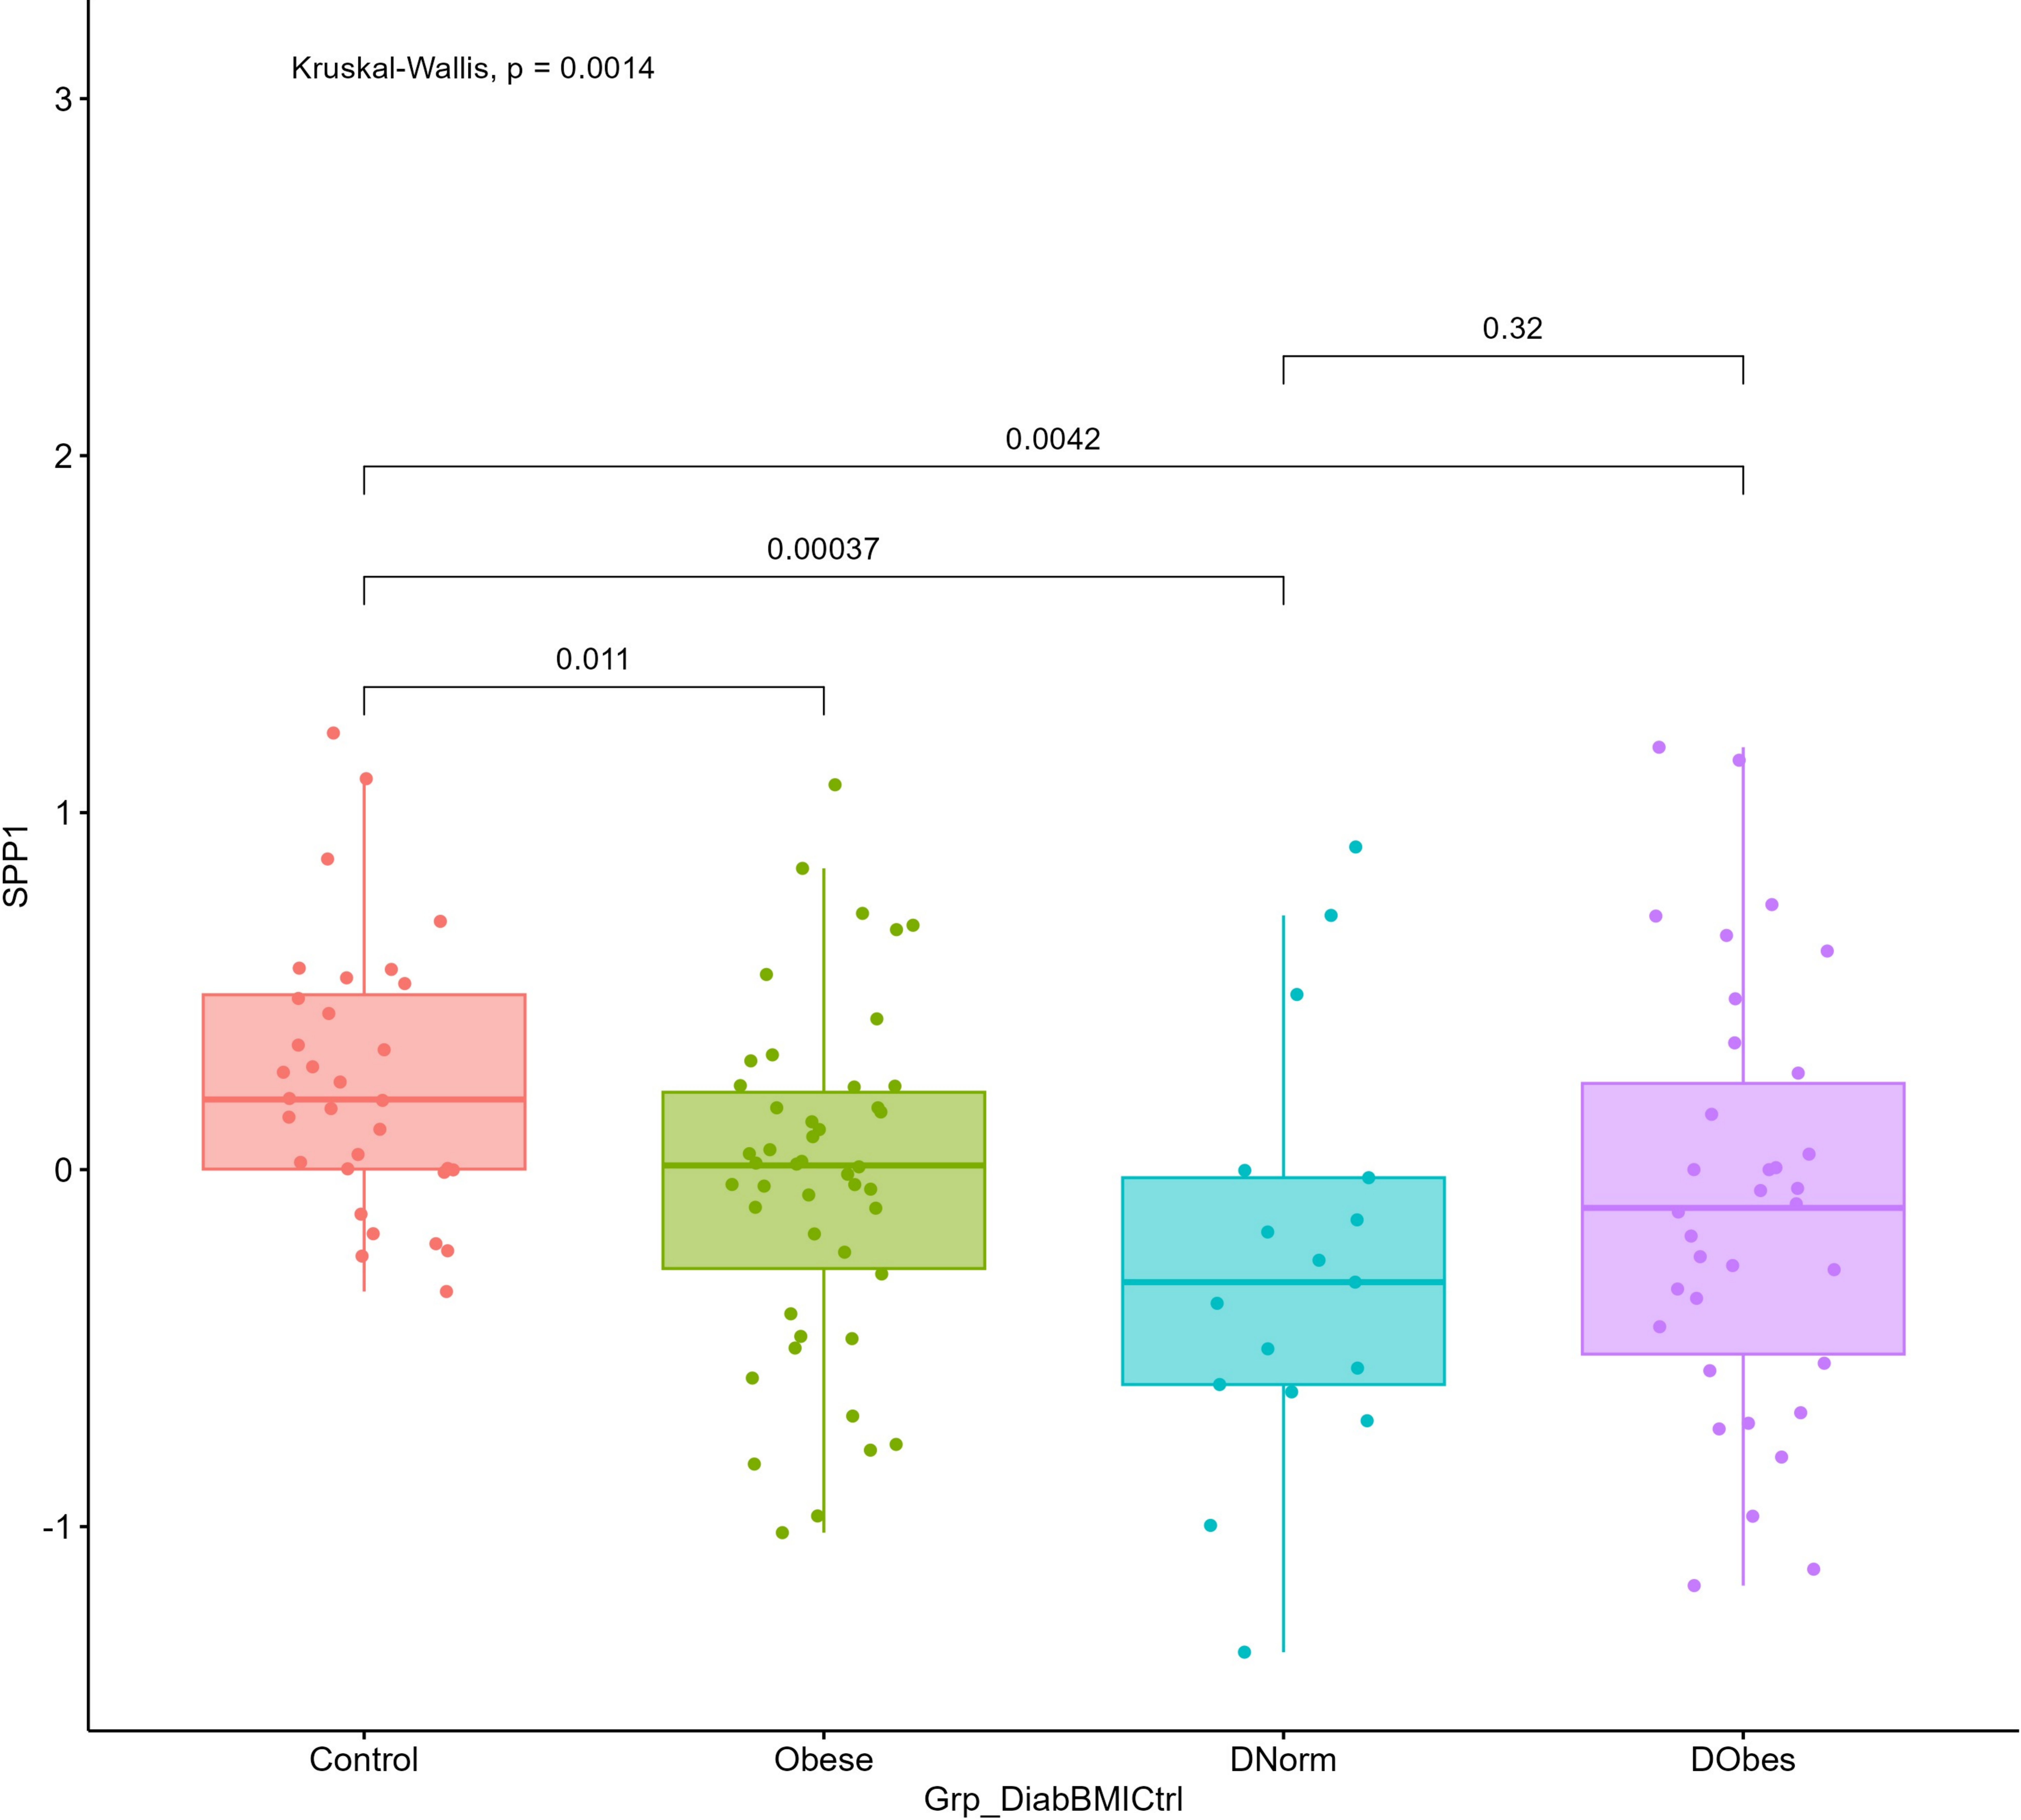

# Grp\_DiabBMICtrl

Grp\_DiabBMICtrl Control Obese DNorm DObes

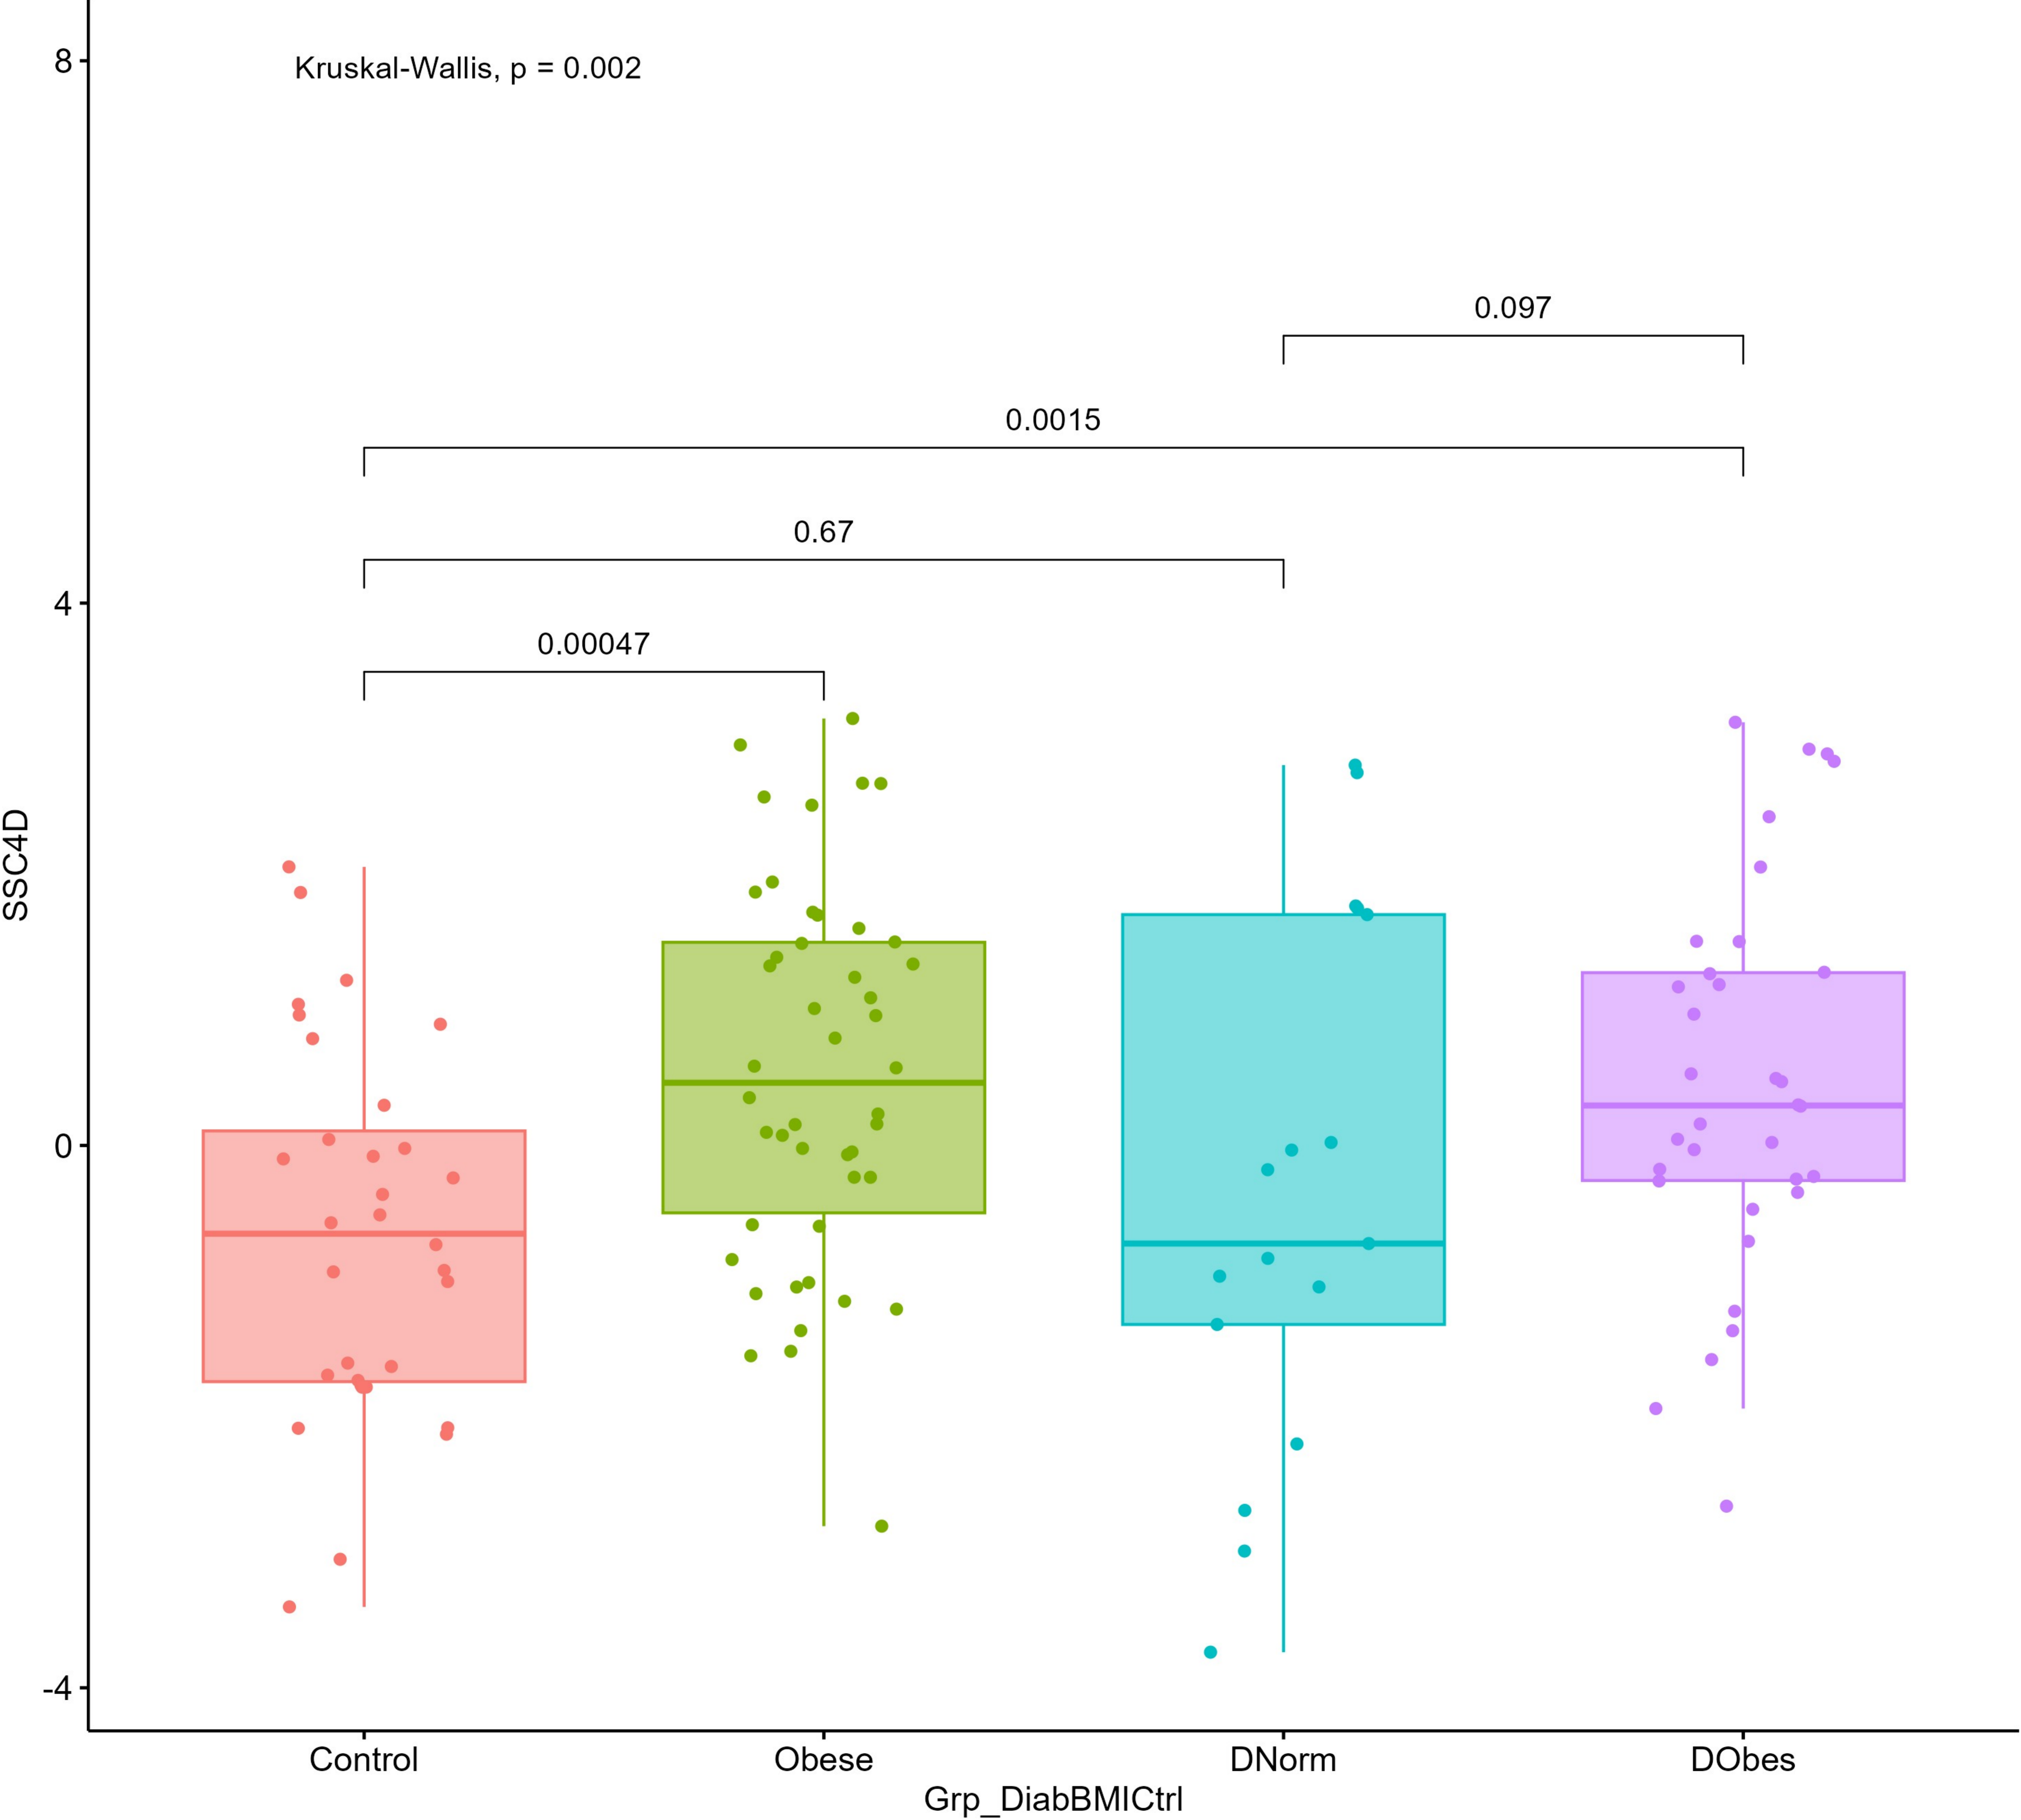

# Grp\_DiabBMICtrl

Grp\_DiabBMICtrl Control Obese DNorm DObes

Kruskal-Wallis, p = 0.0015

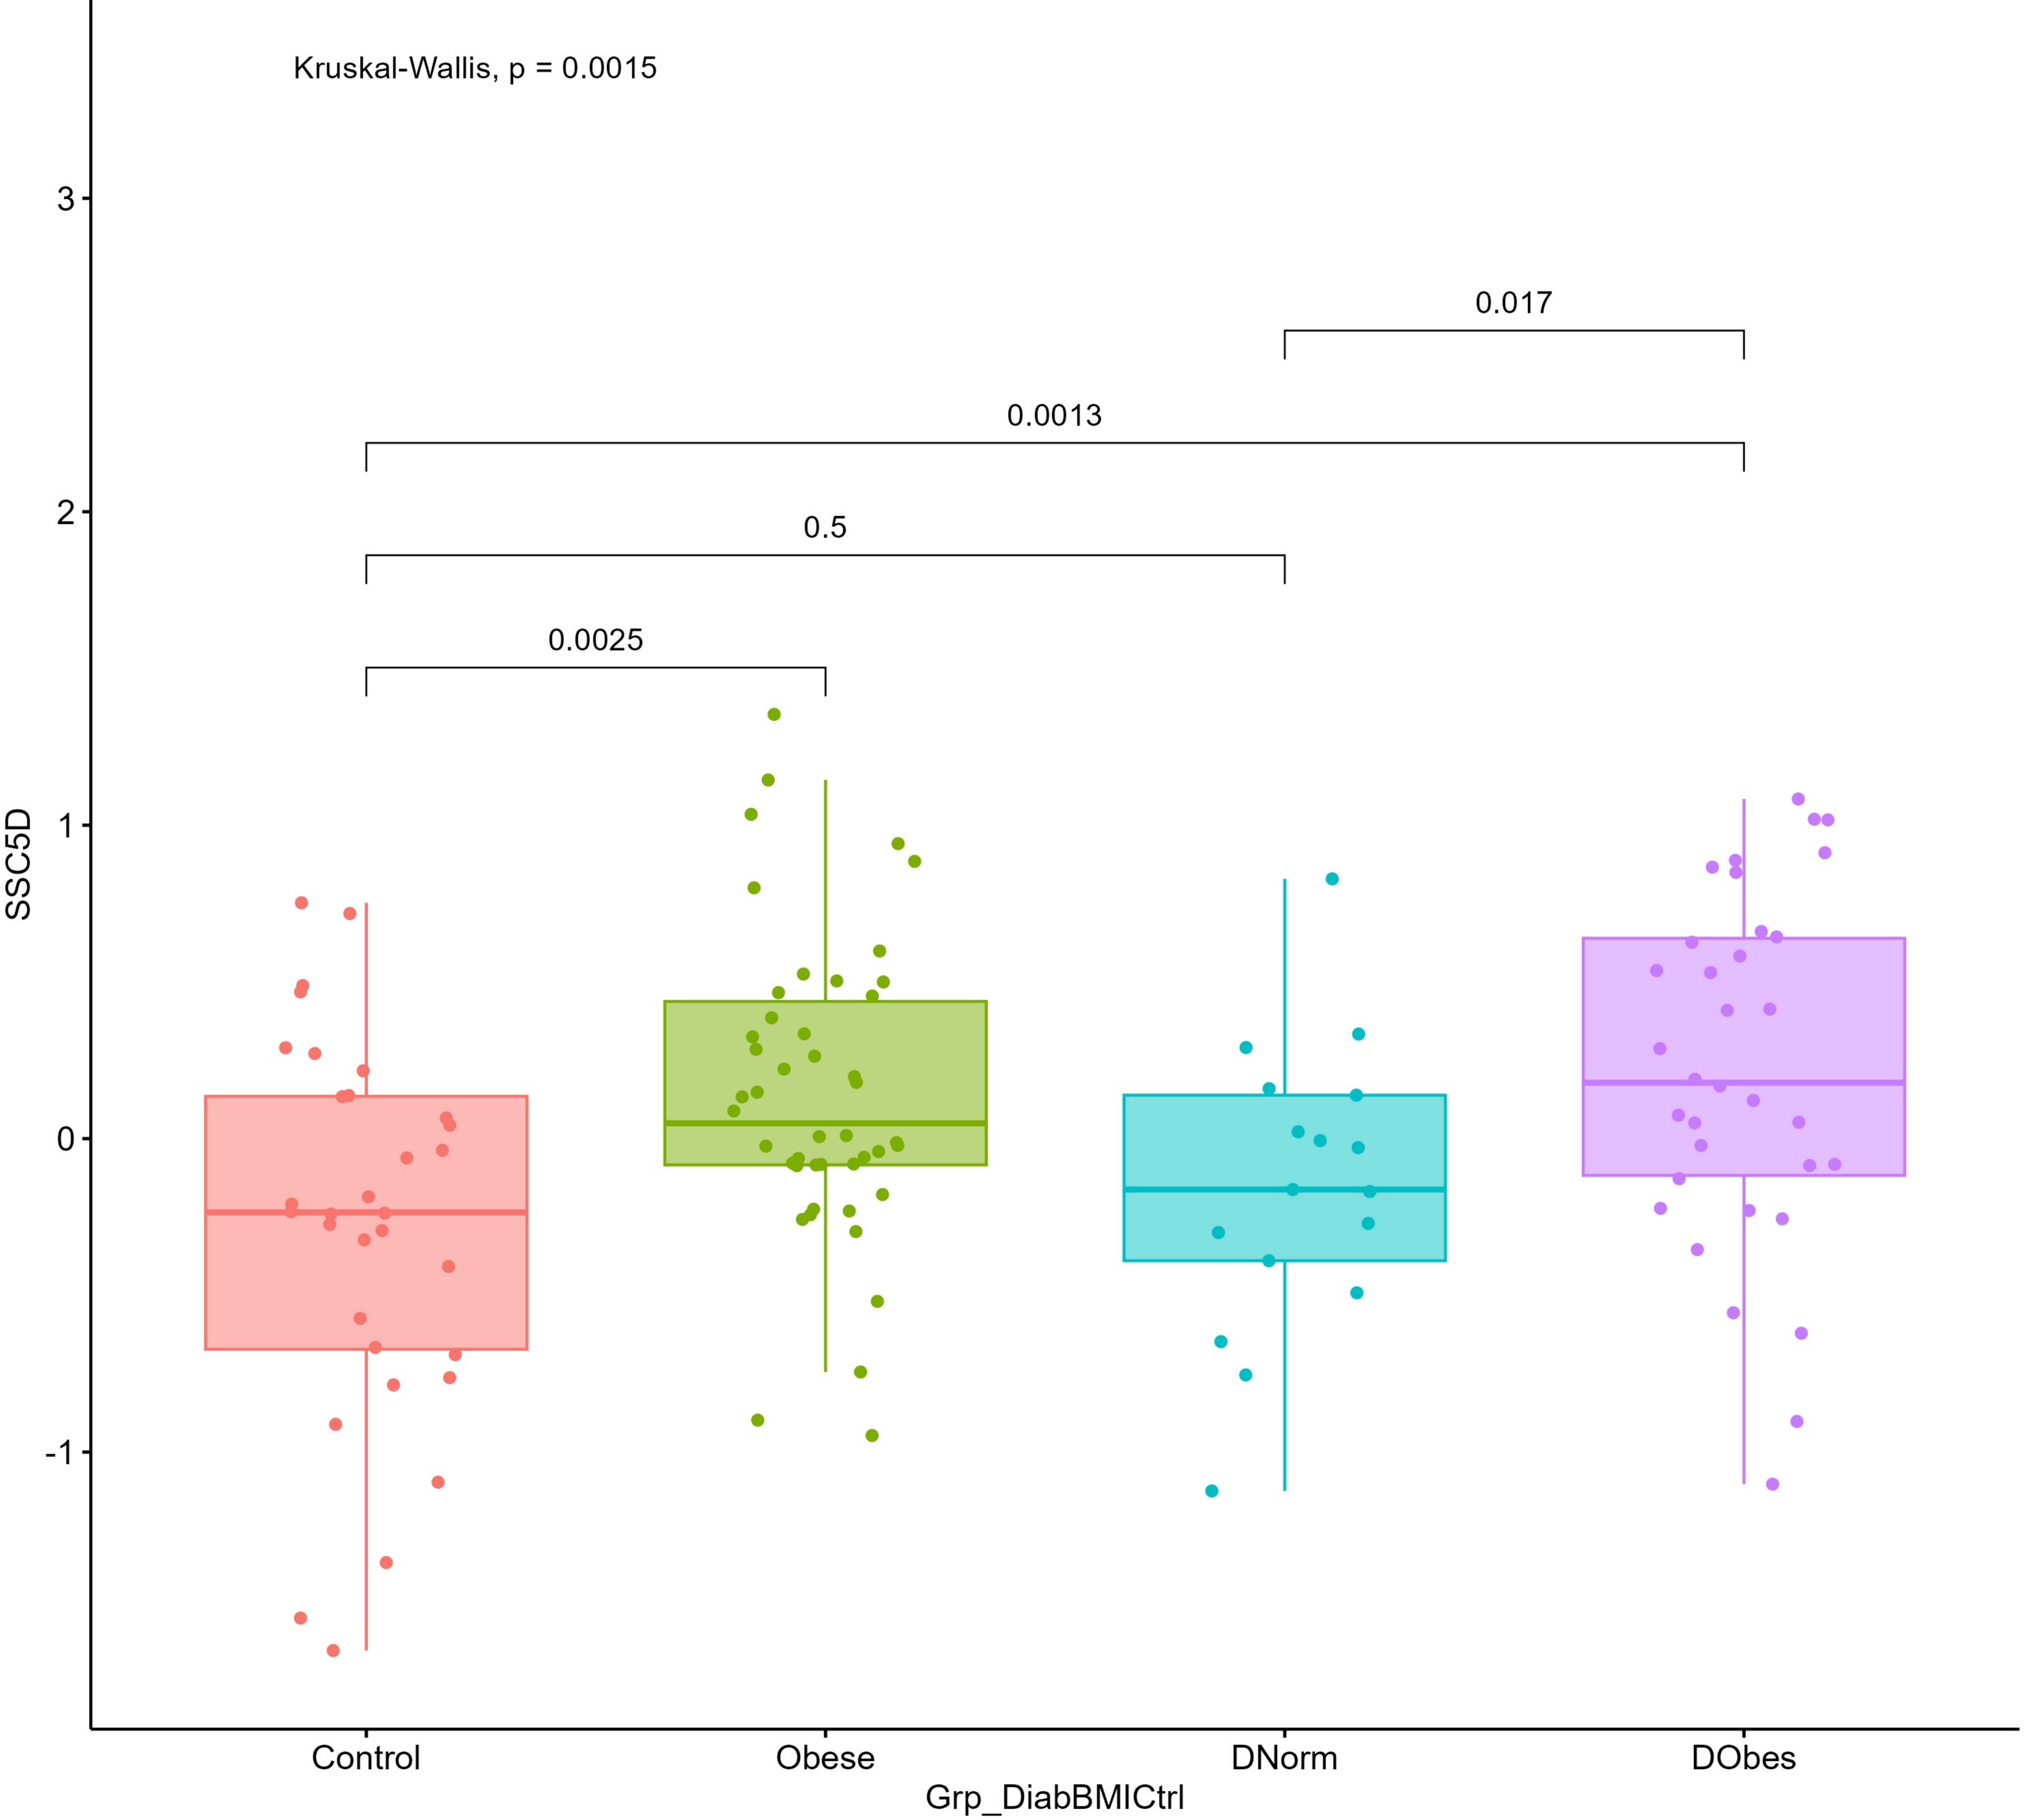

# Grp\_DiabBMICtrl

Grp\_DiabBMICtrl Control Obese DNorm DObes

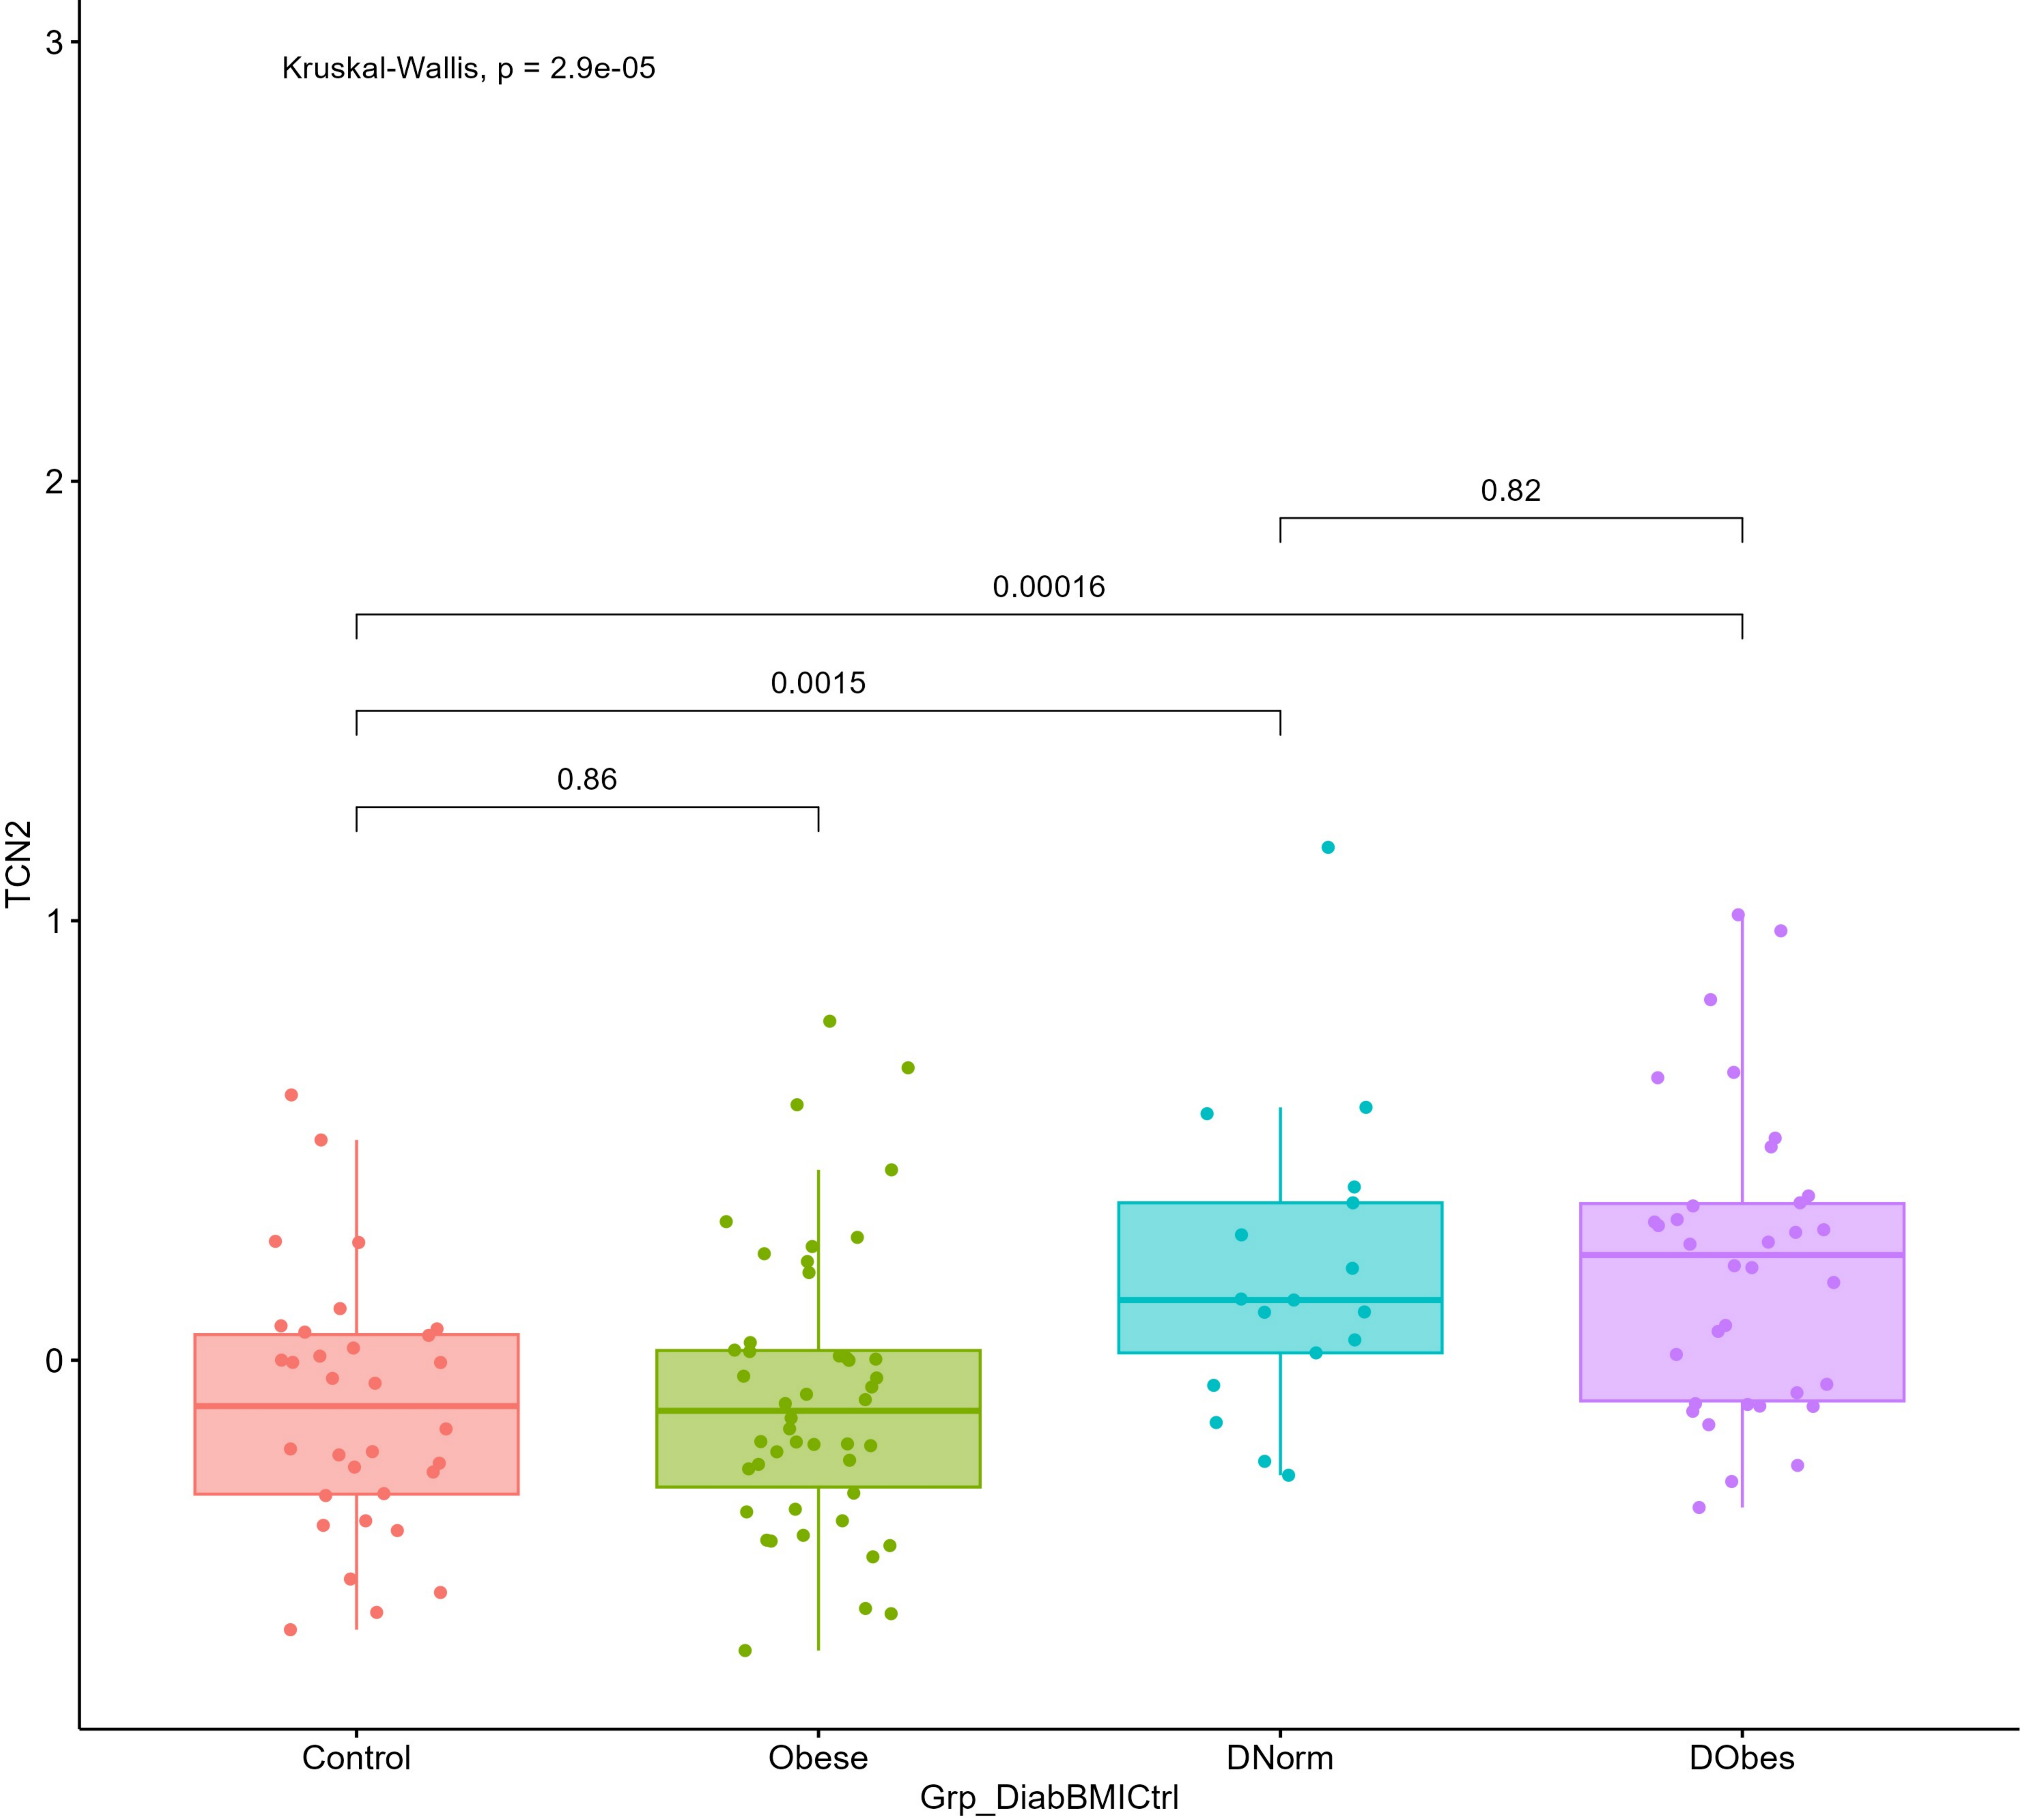

# Grp\_DiabBMICtrl

Grp\_DiabBMICtrl Control Obese DNorm DObes

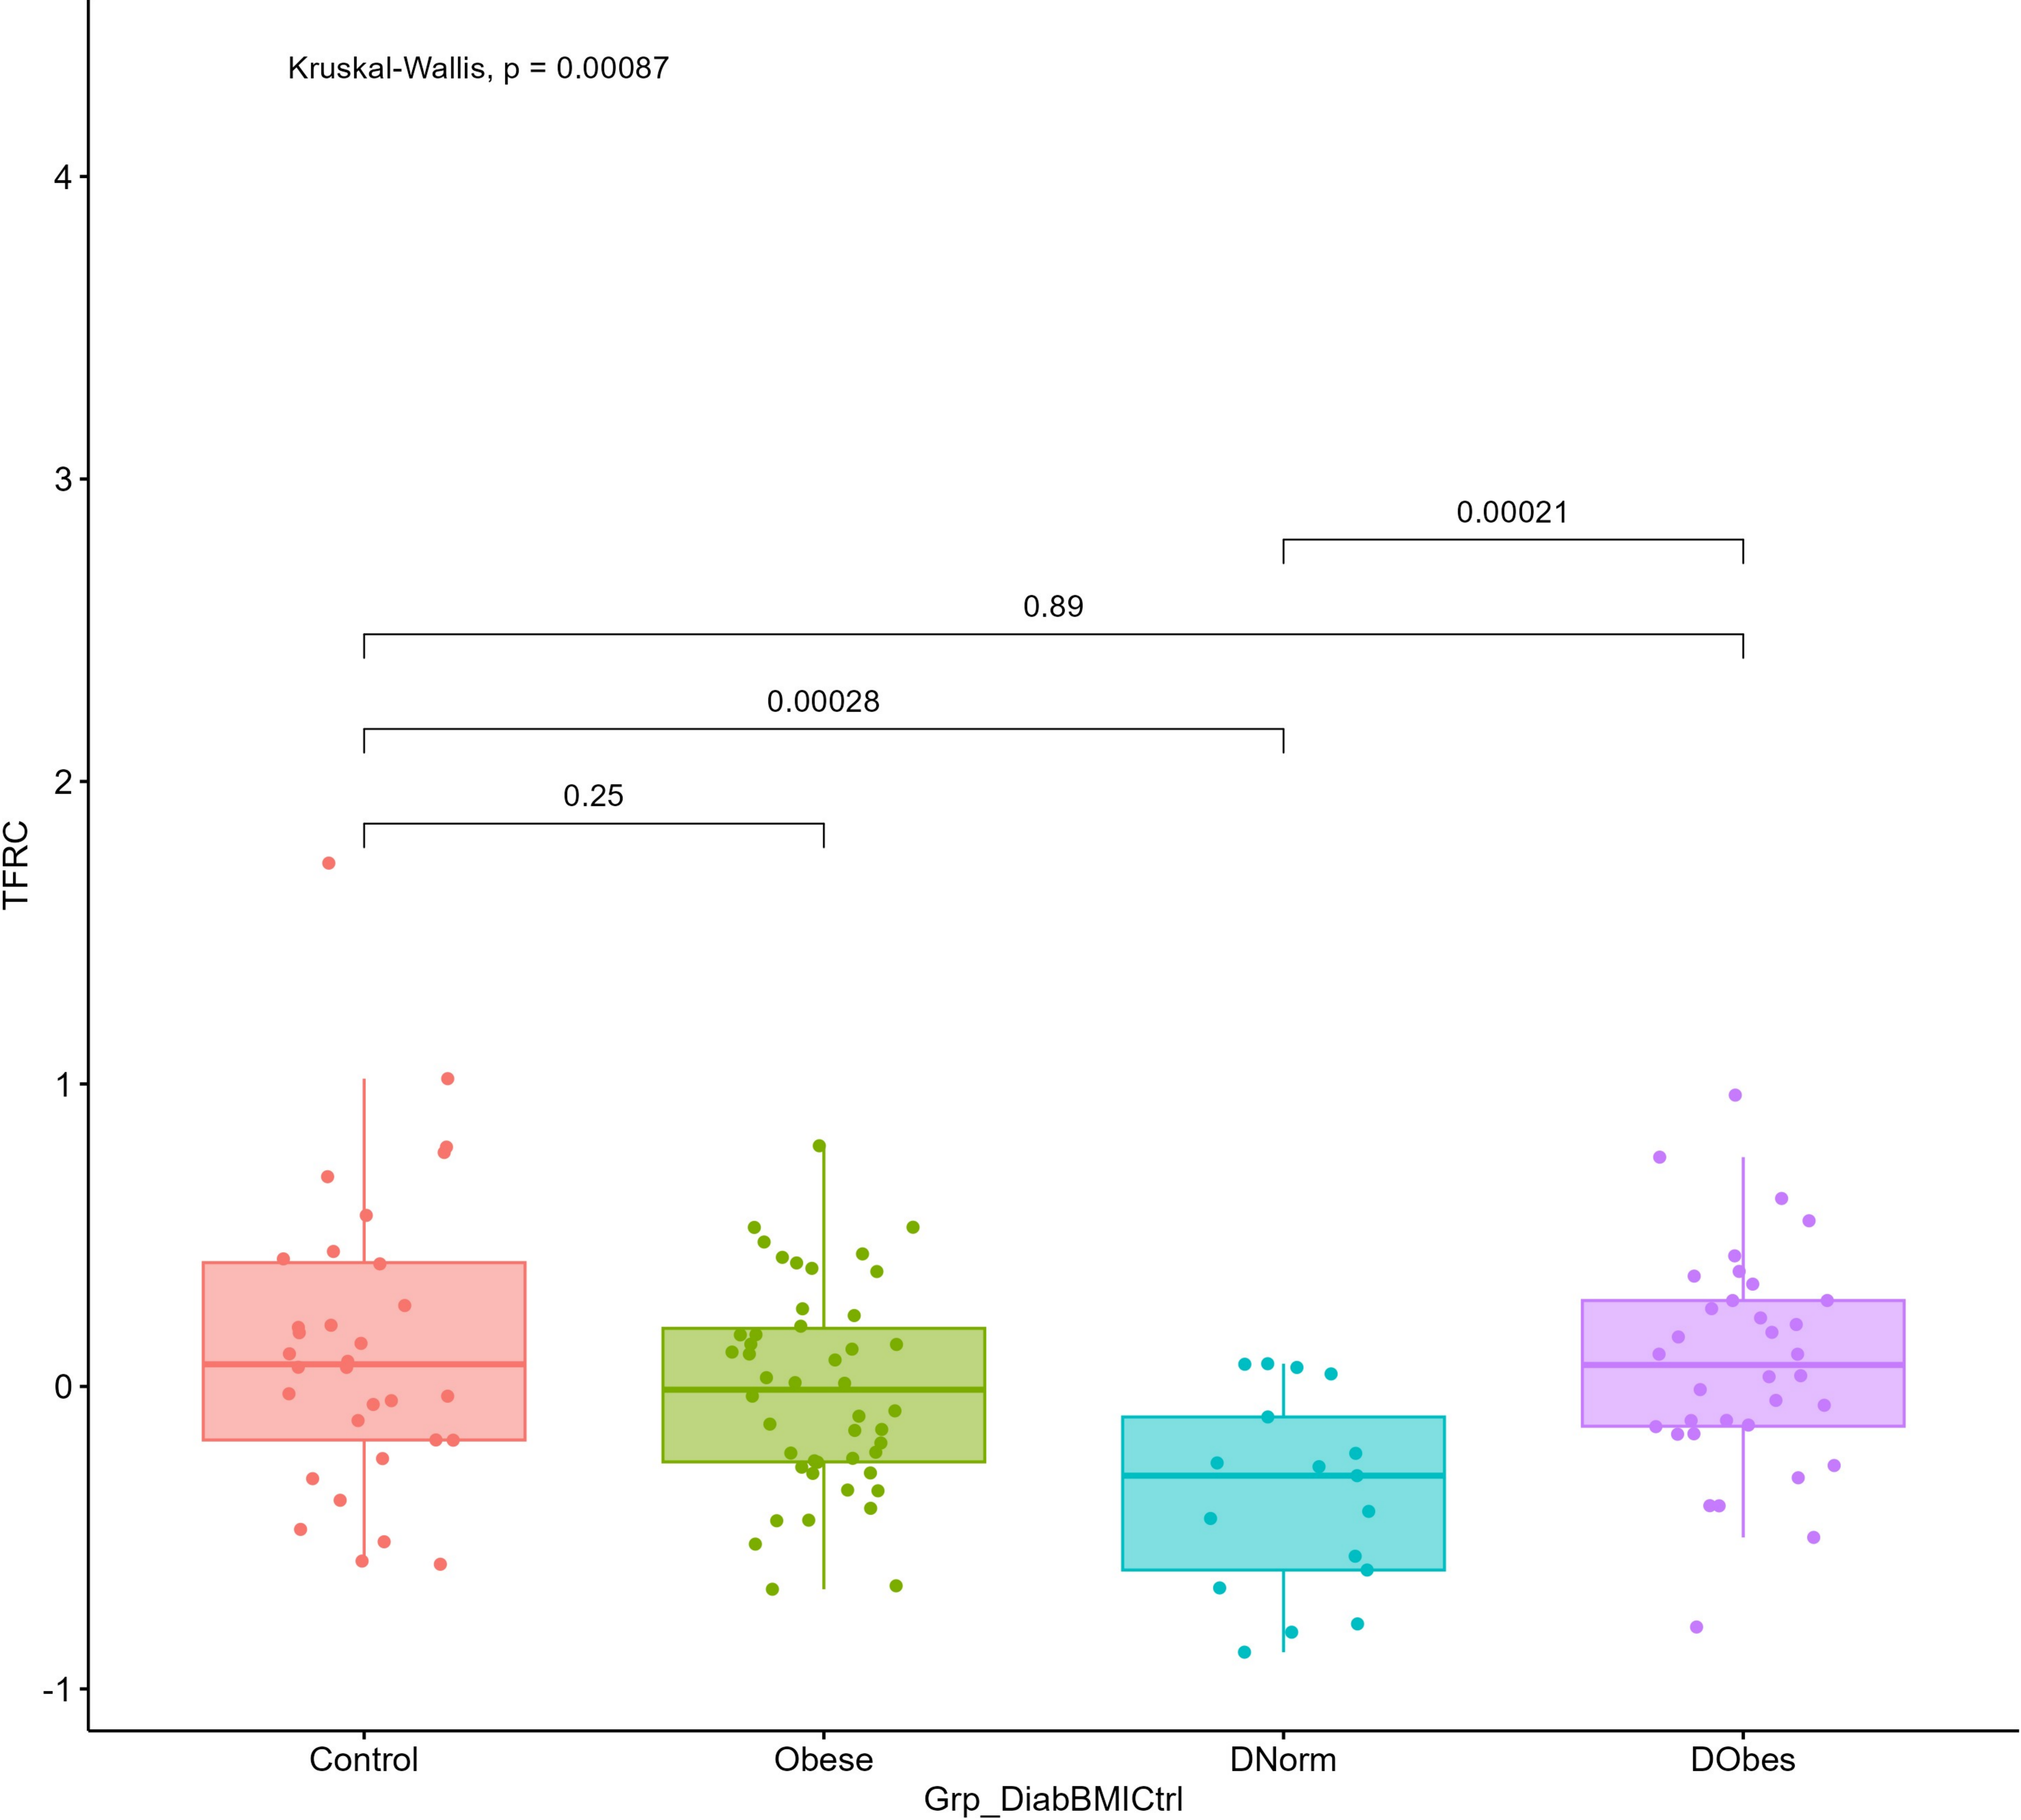

# Grp\_DiabBMICtrl

Grp\_DiabBMICtrl Control Obese DNorm DObes

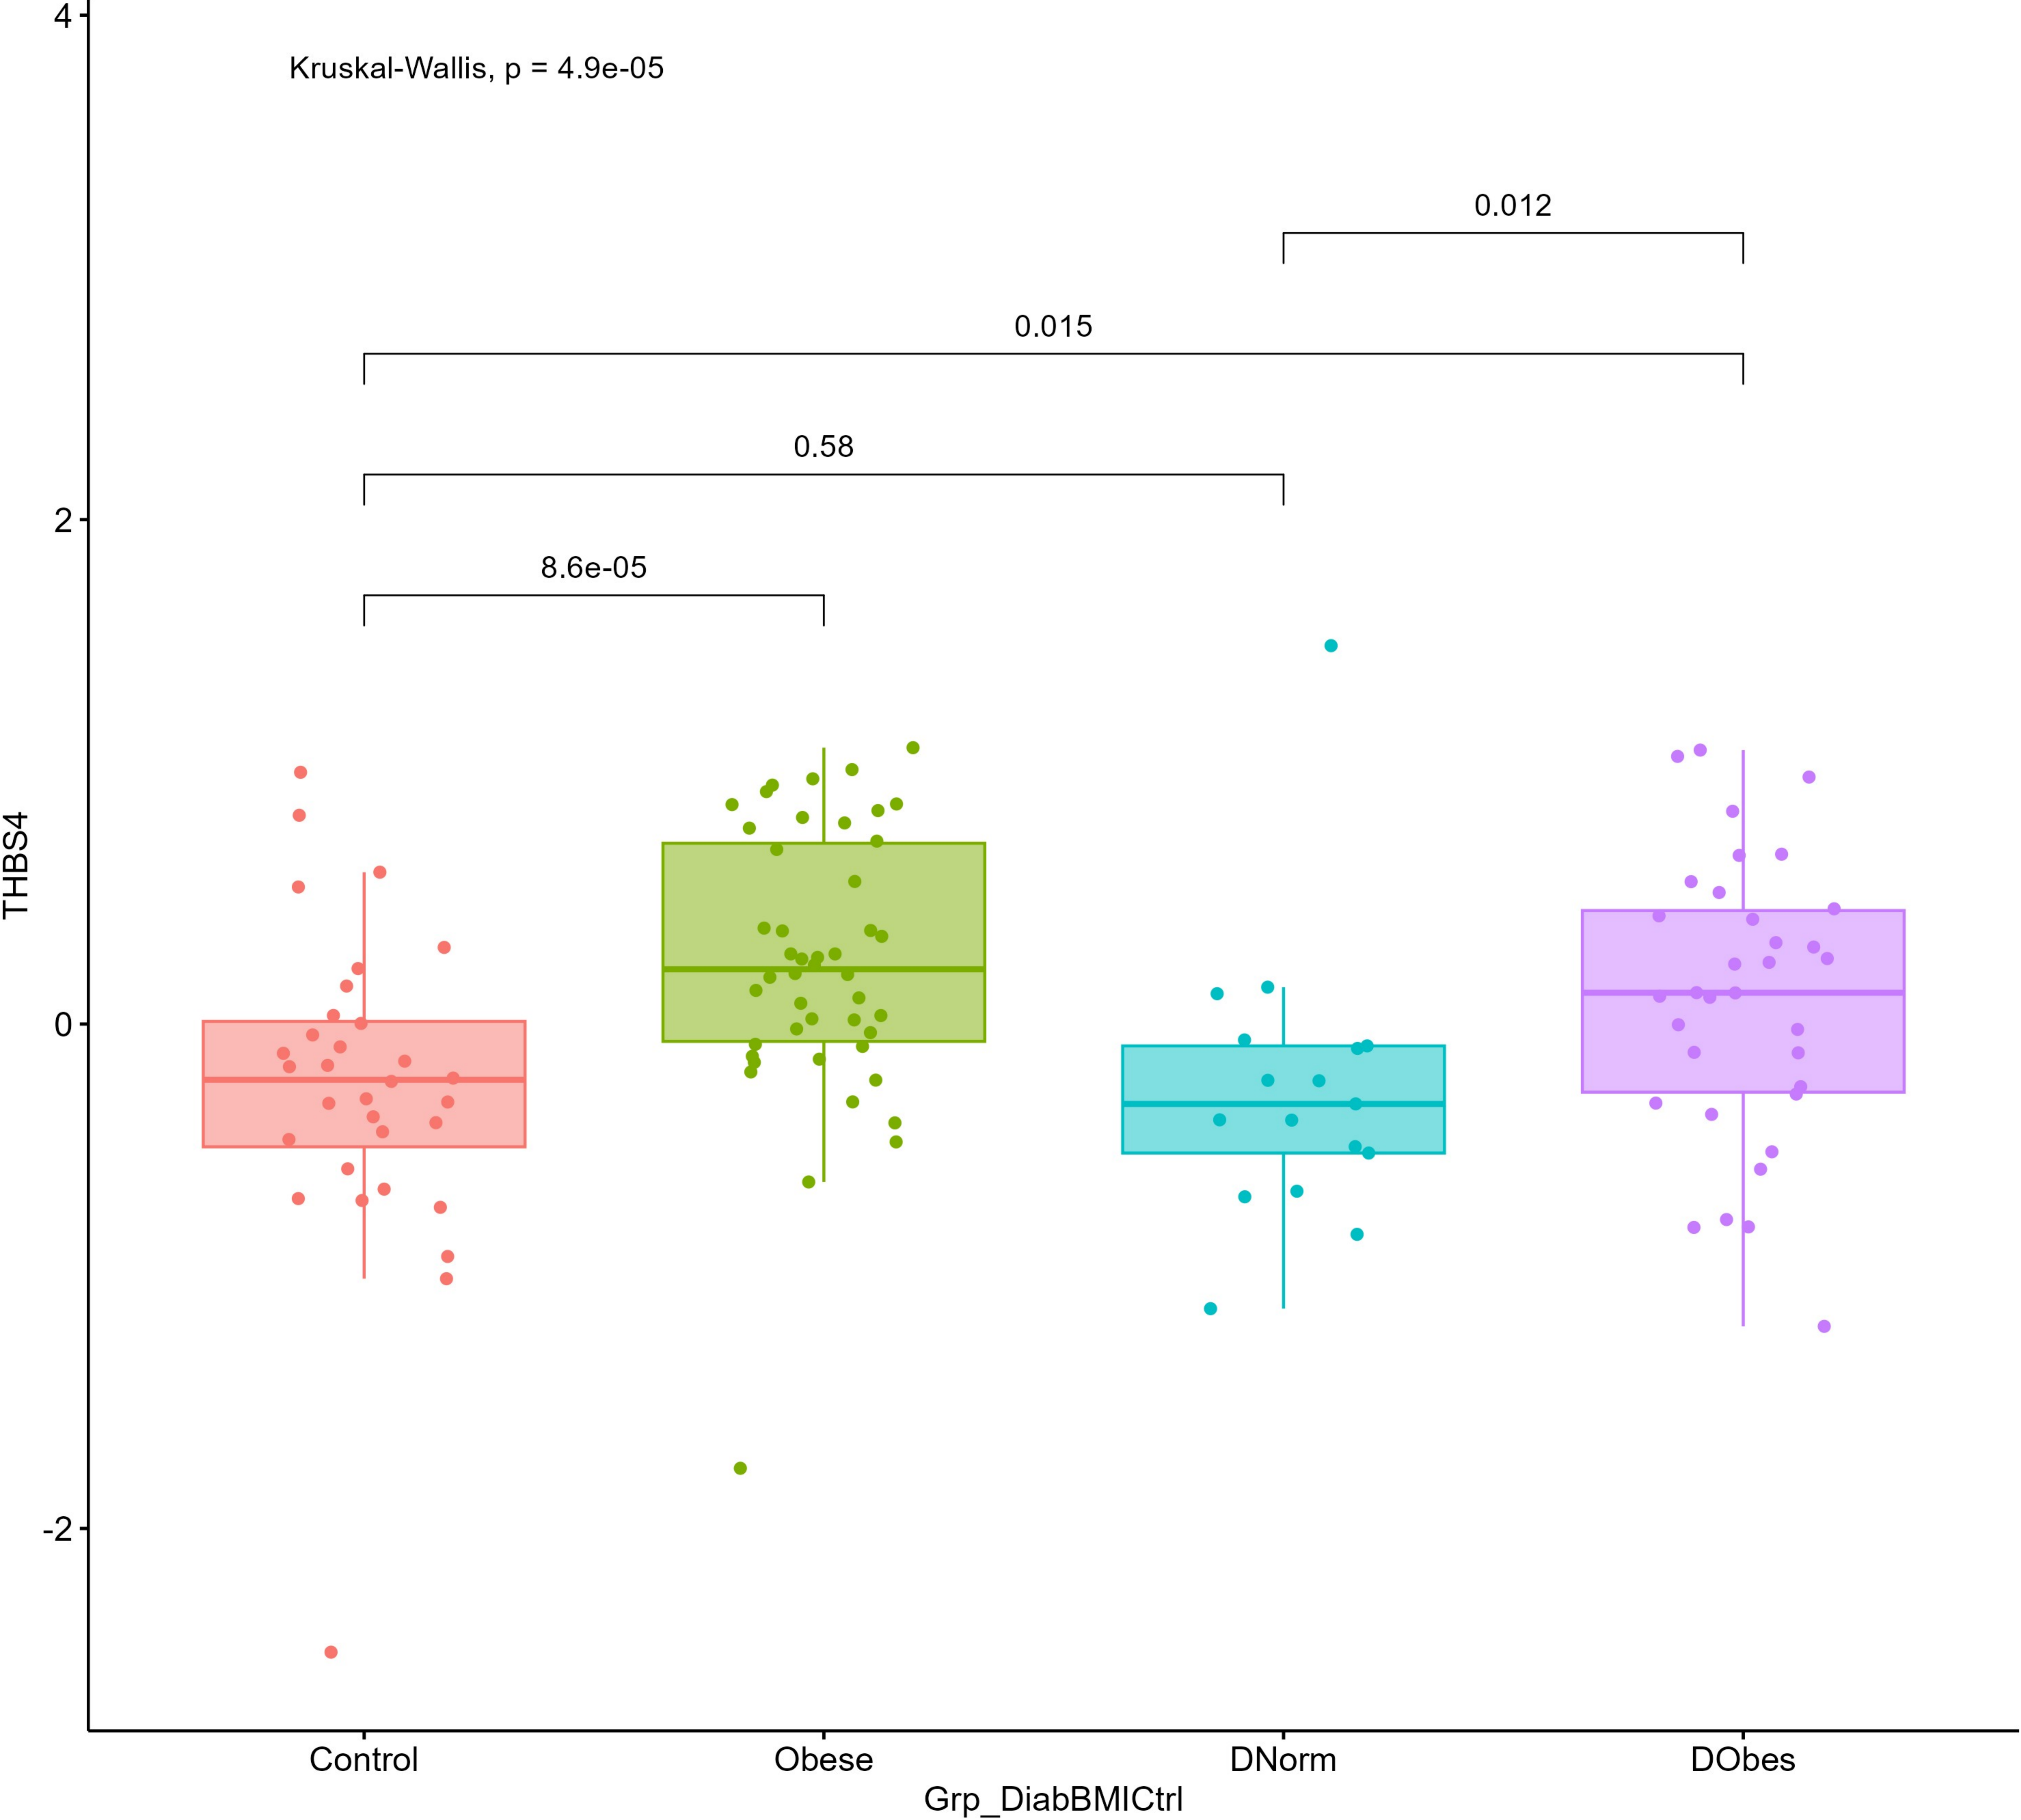

# Grp\_DiabBMICtrl

Grp\_DiabBMICtrl Control Obese DNorm DObes

Kruskal-Wallis,  $p = 1.2e-06$

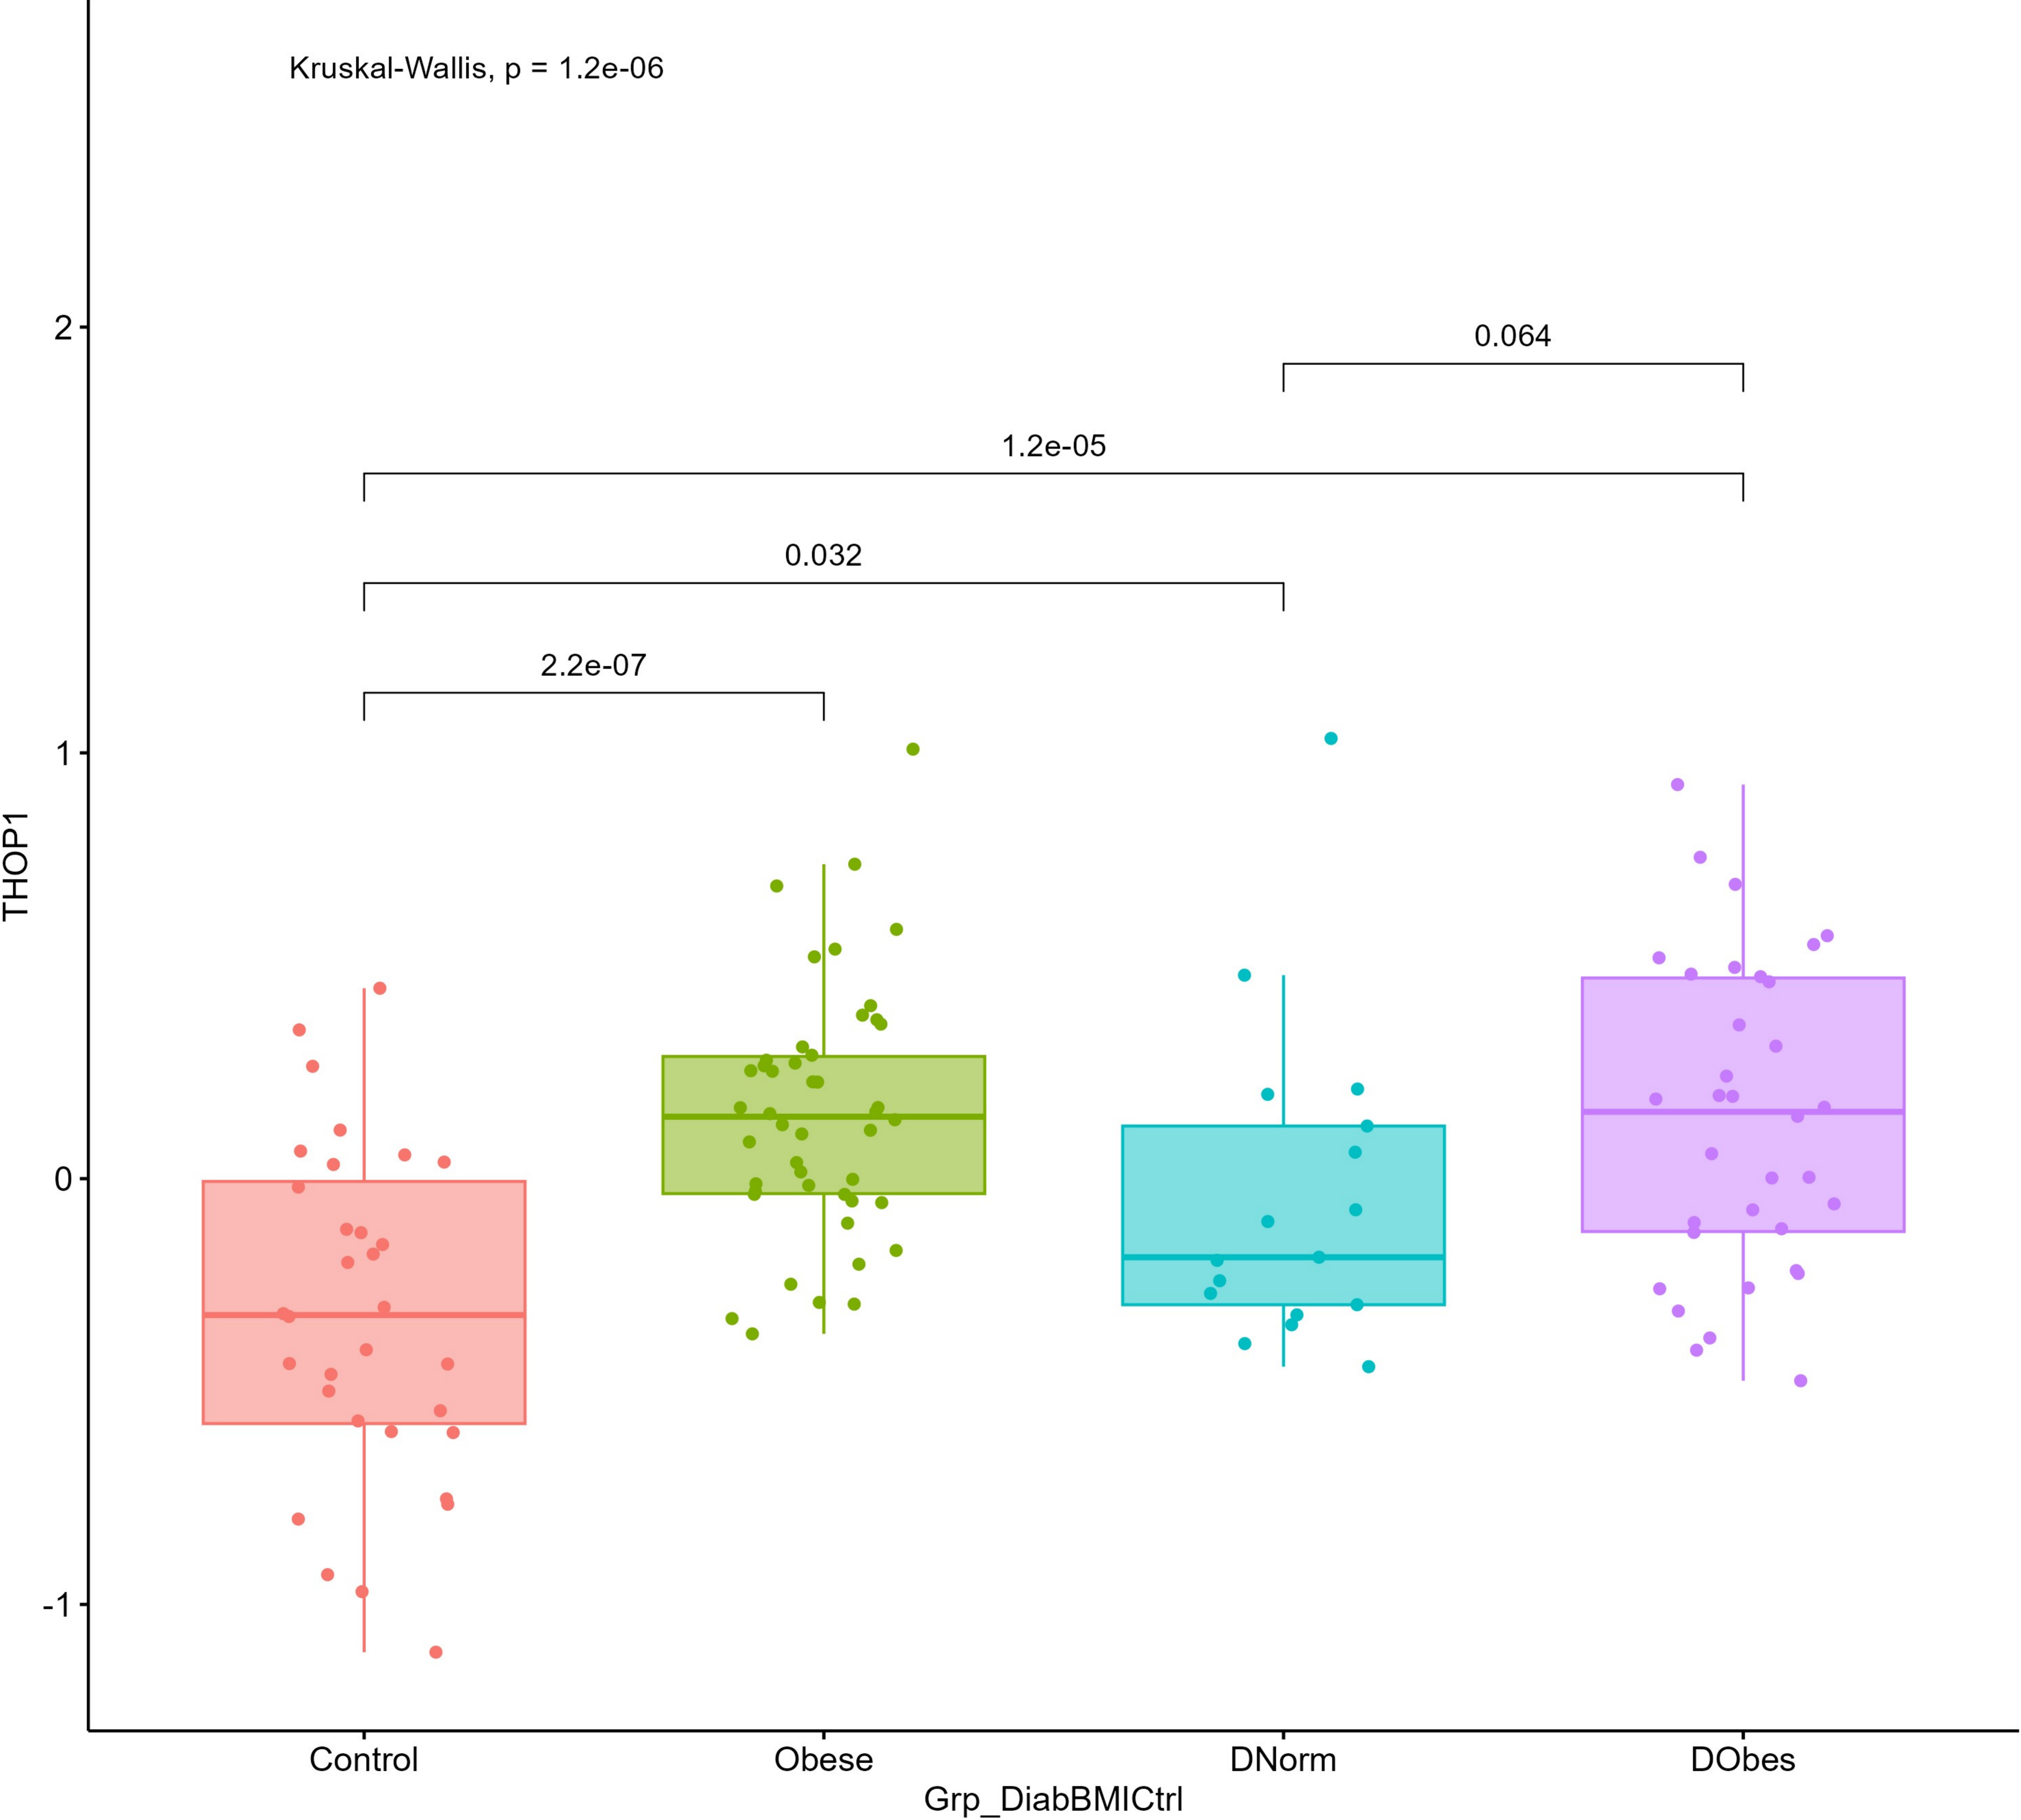

# Grp\_DiabBMICtrl

Grp\_DiabBMICtrl Control Obese DNorm DObes

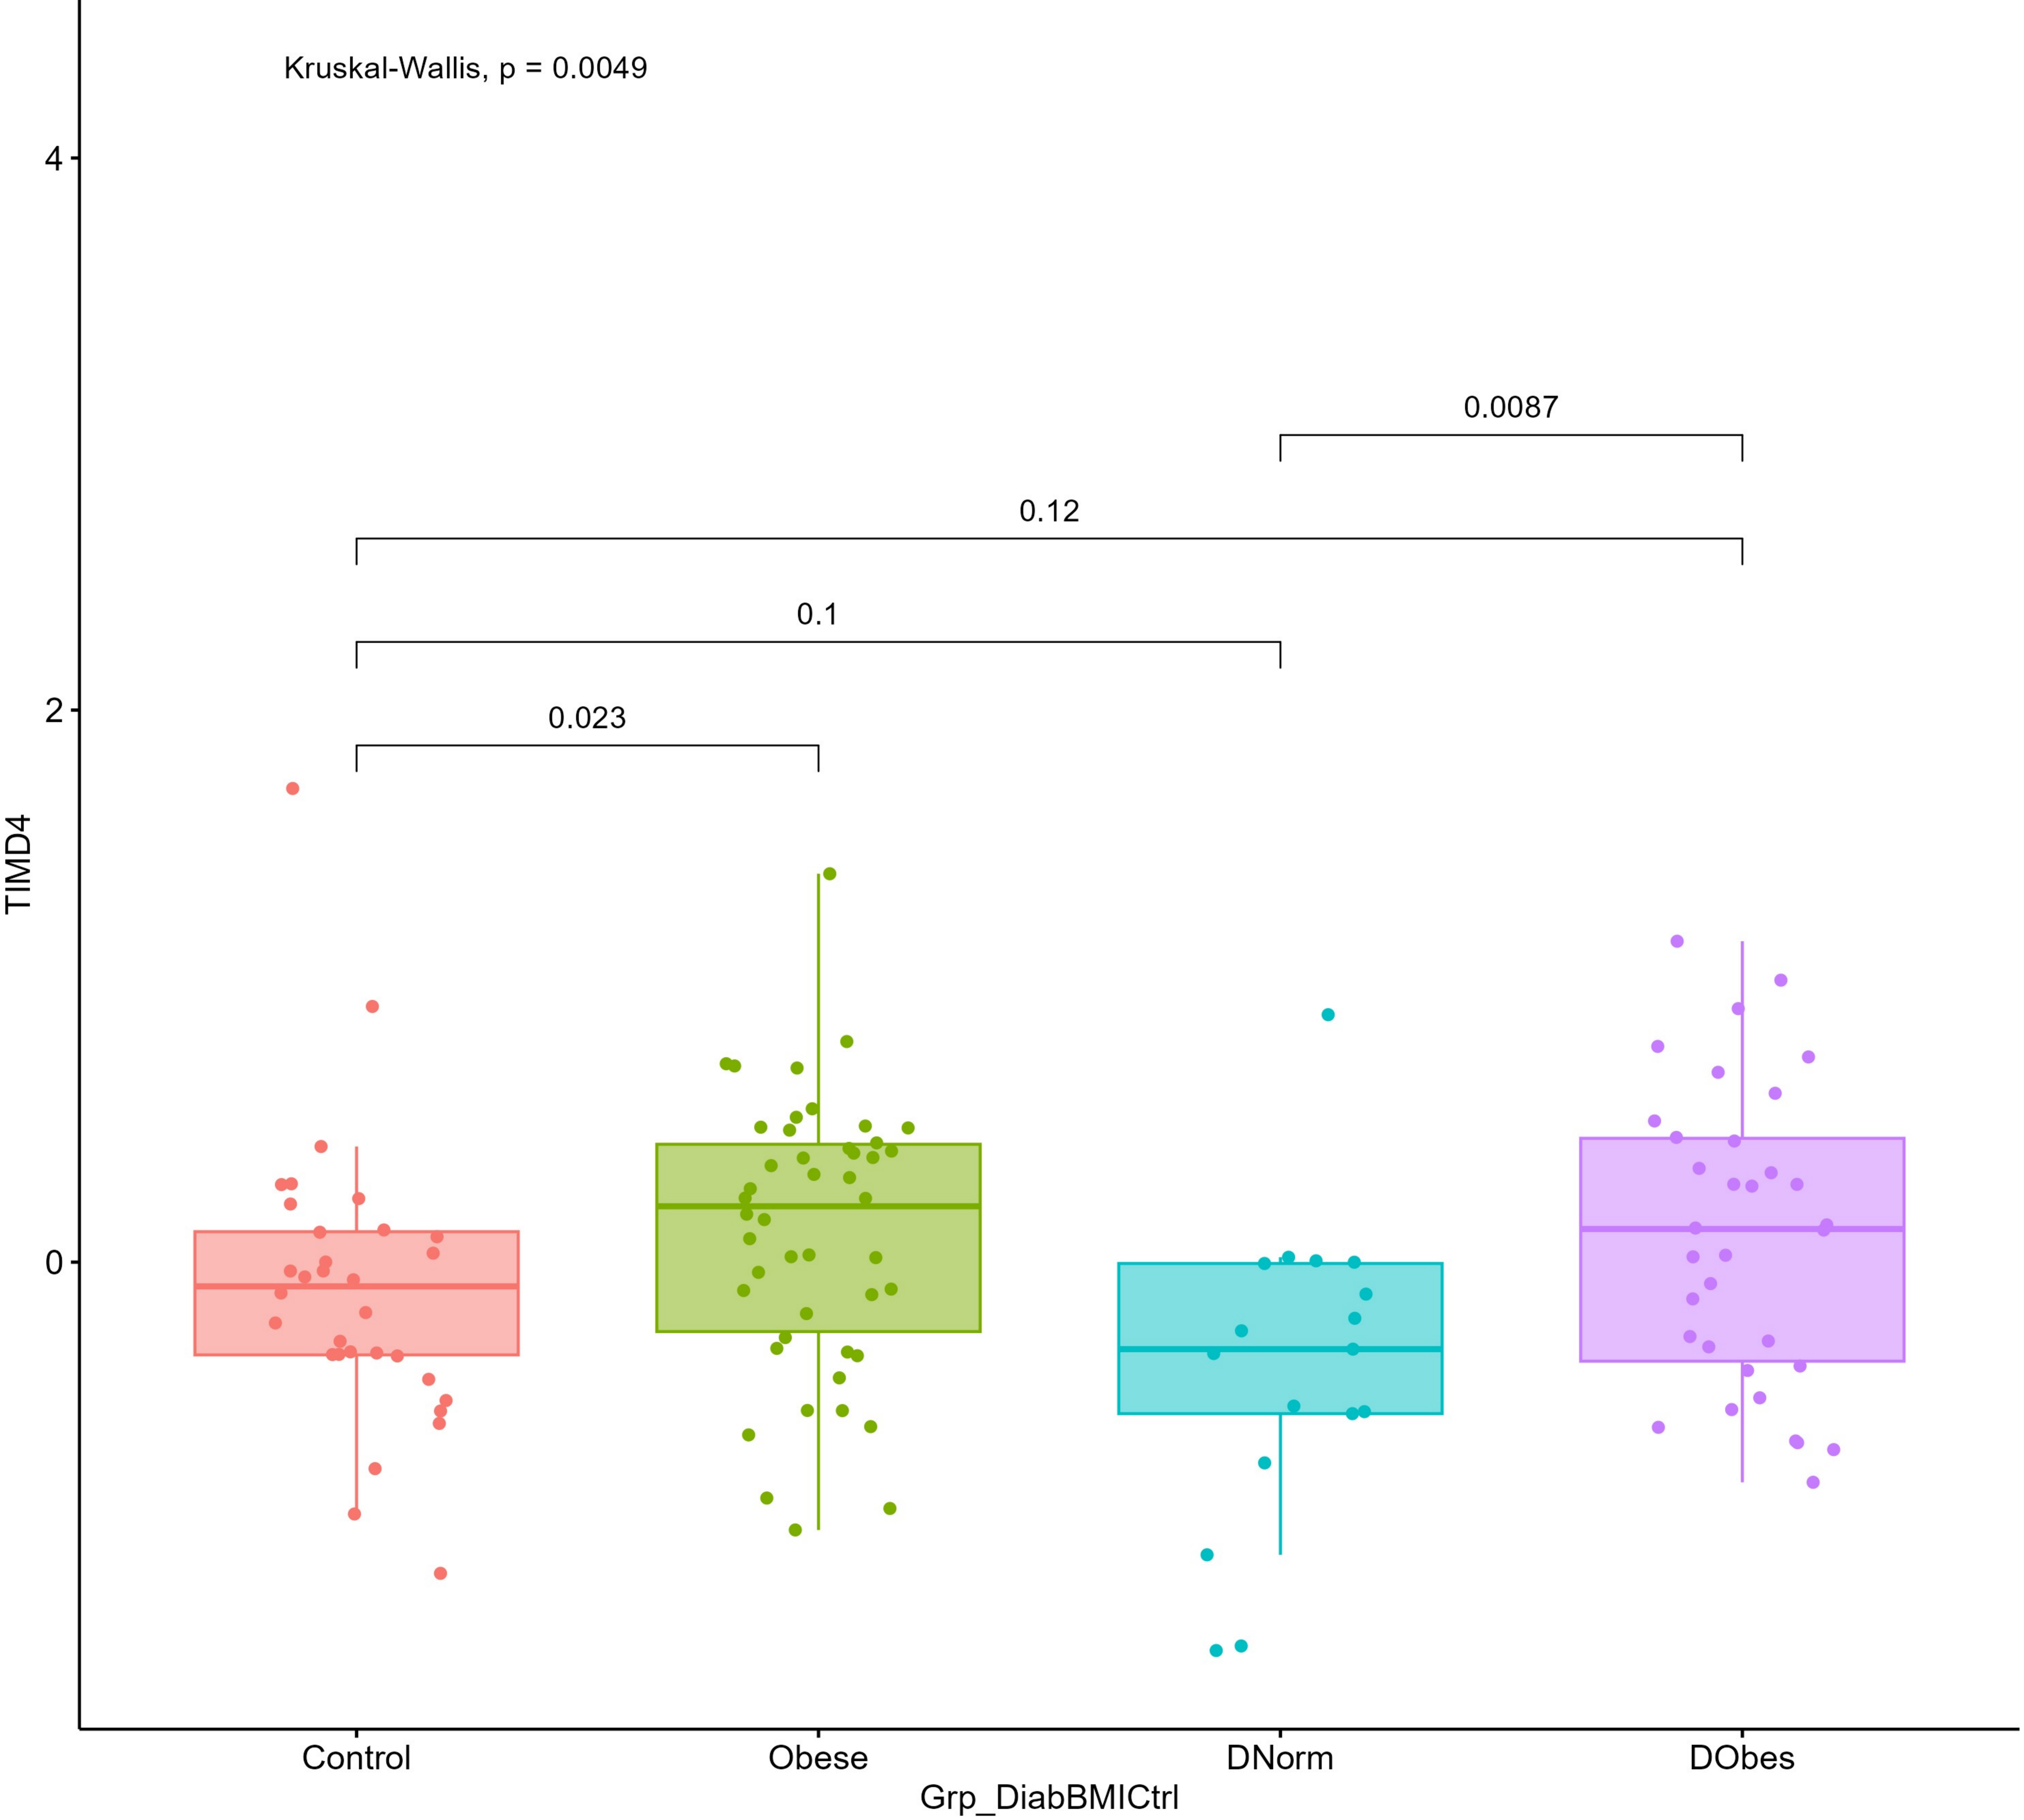

# Grp\_DiabBMICtrl

Grp\_DiabBMICtrl Control Obese DNorm DObes

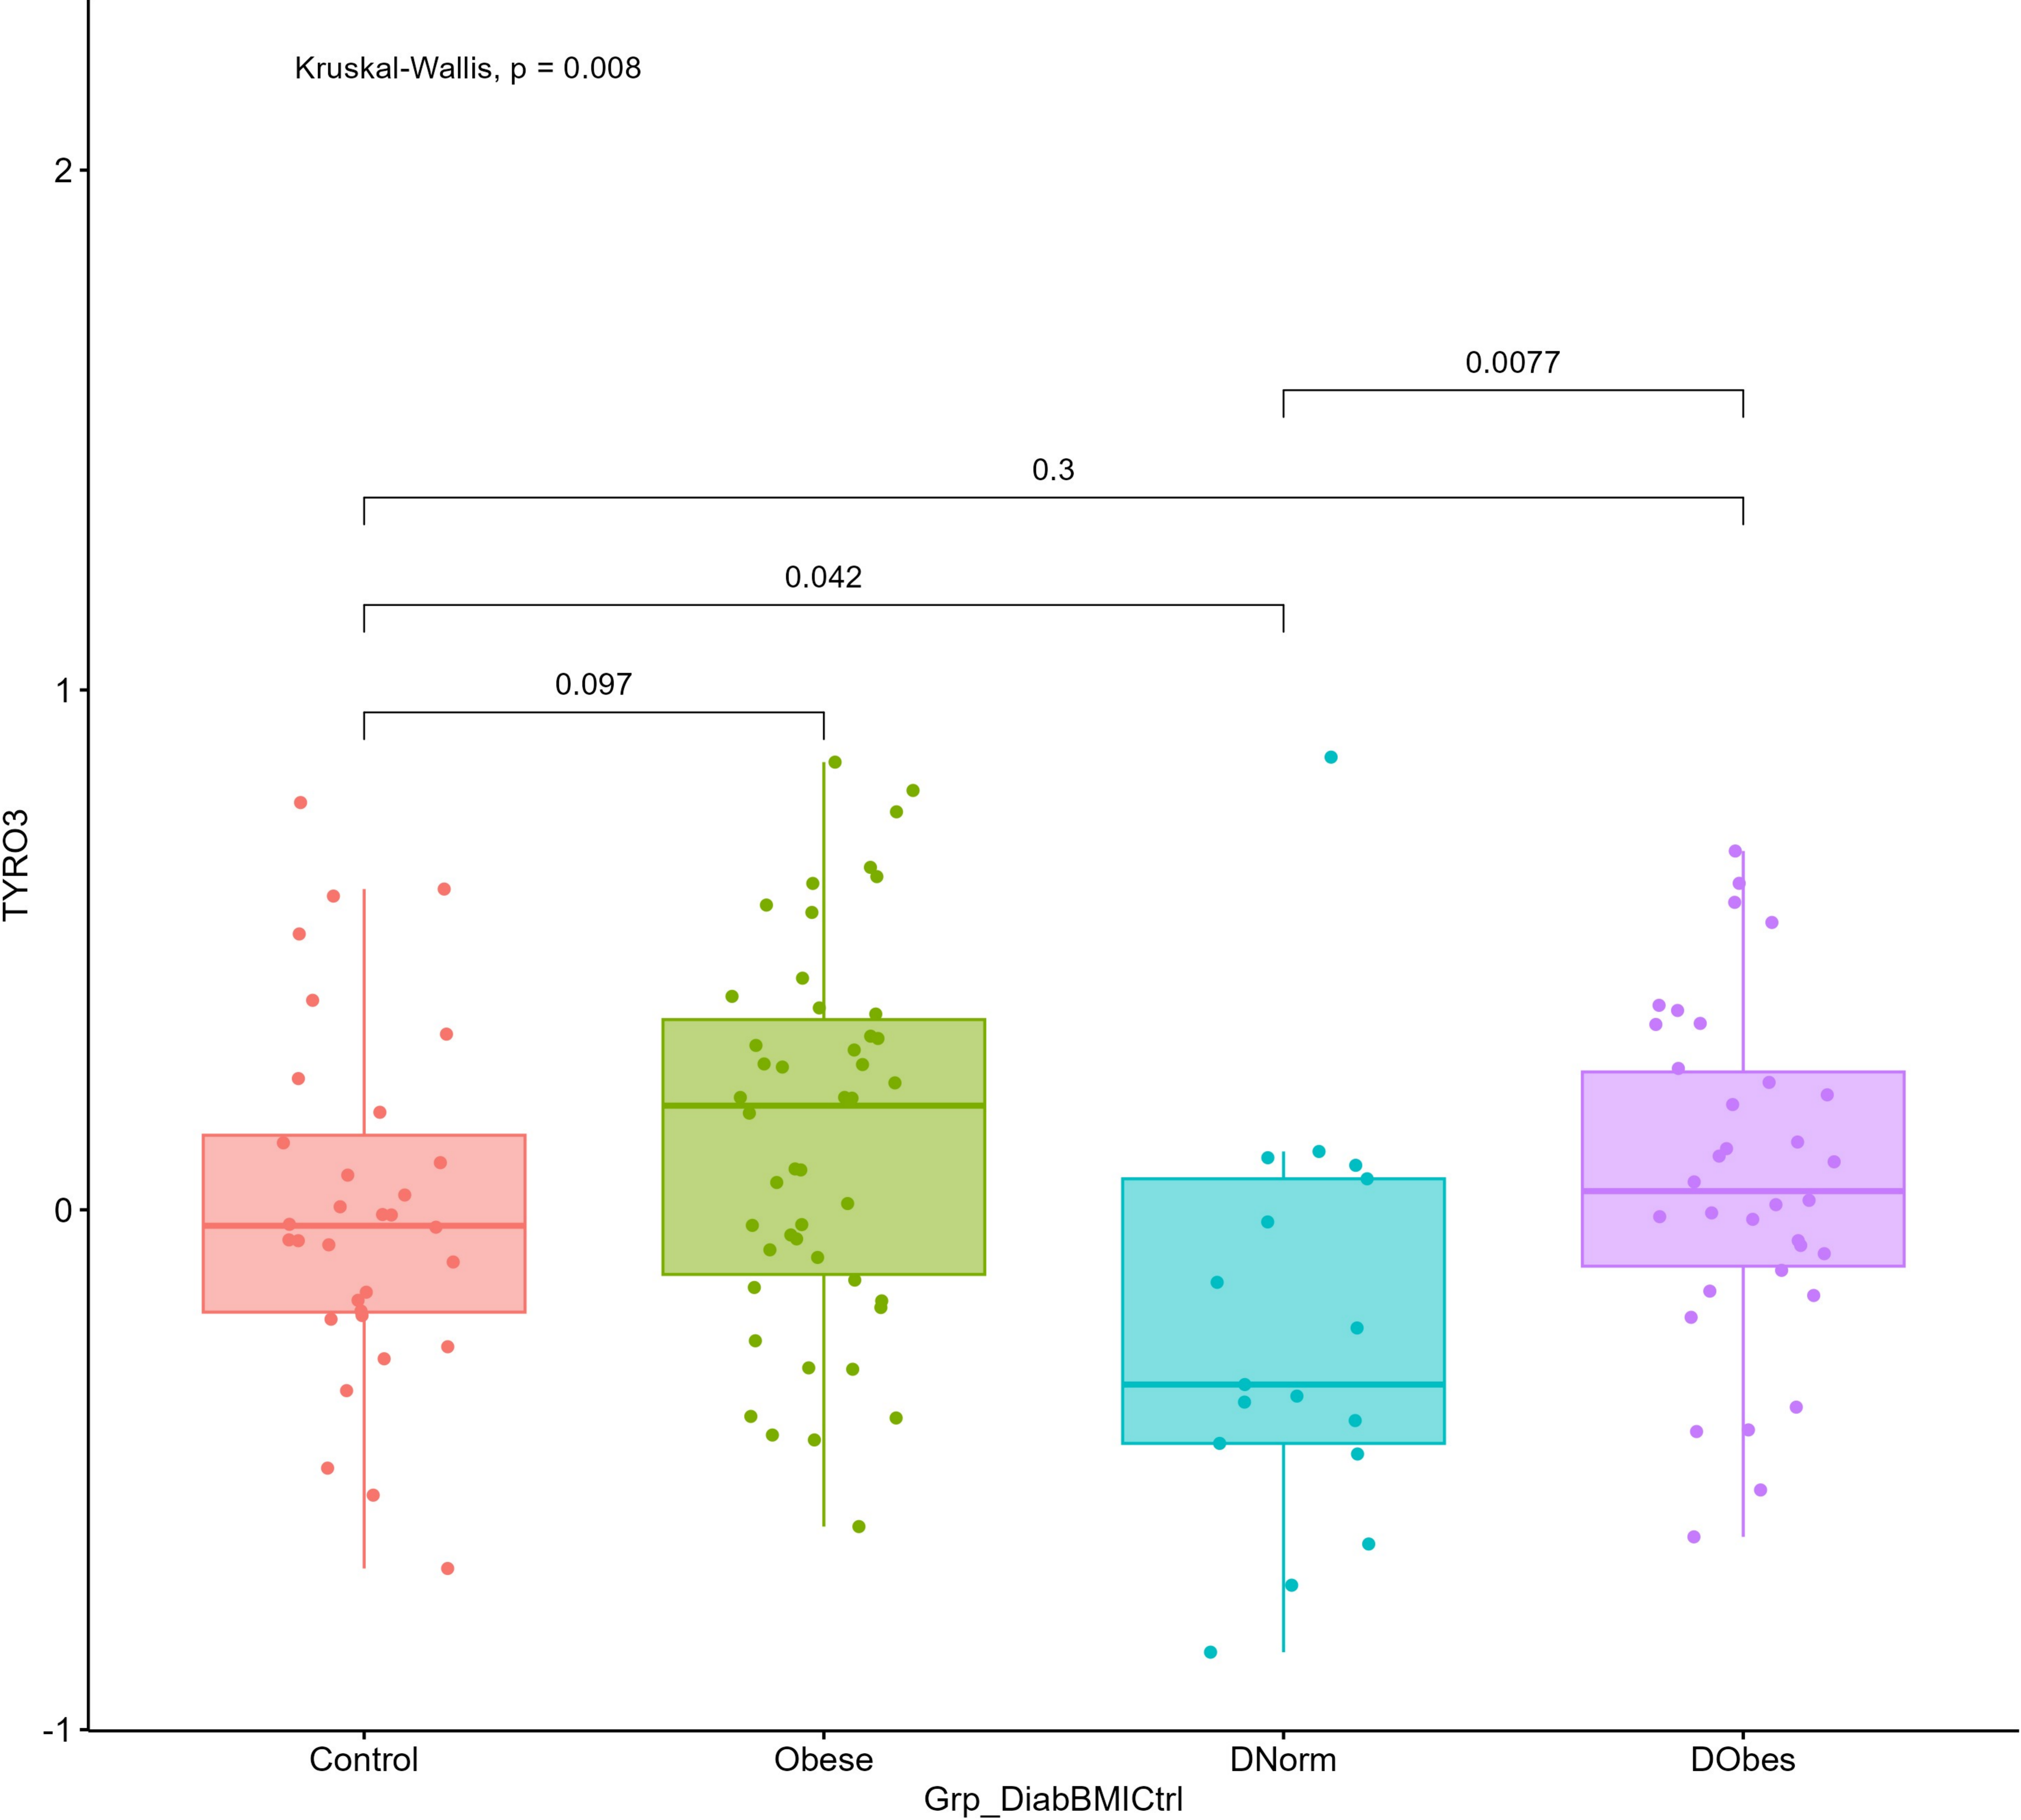

# Grp\_DiabBMICtrl

Grp\_DiabBMICtrl Control Obese DNorm DObes

Kruskal-Wallis, p = 0.0061

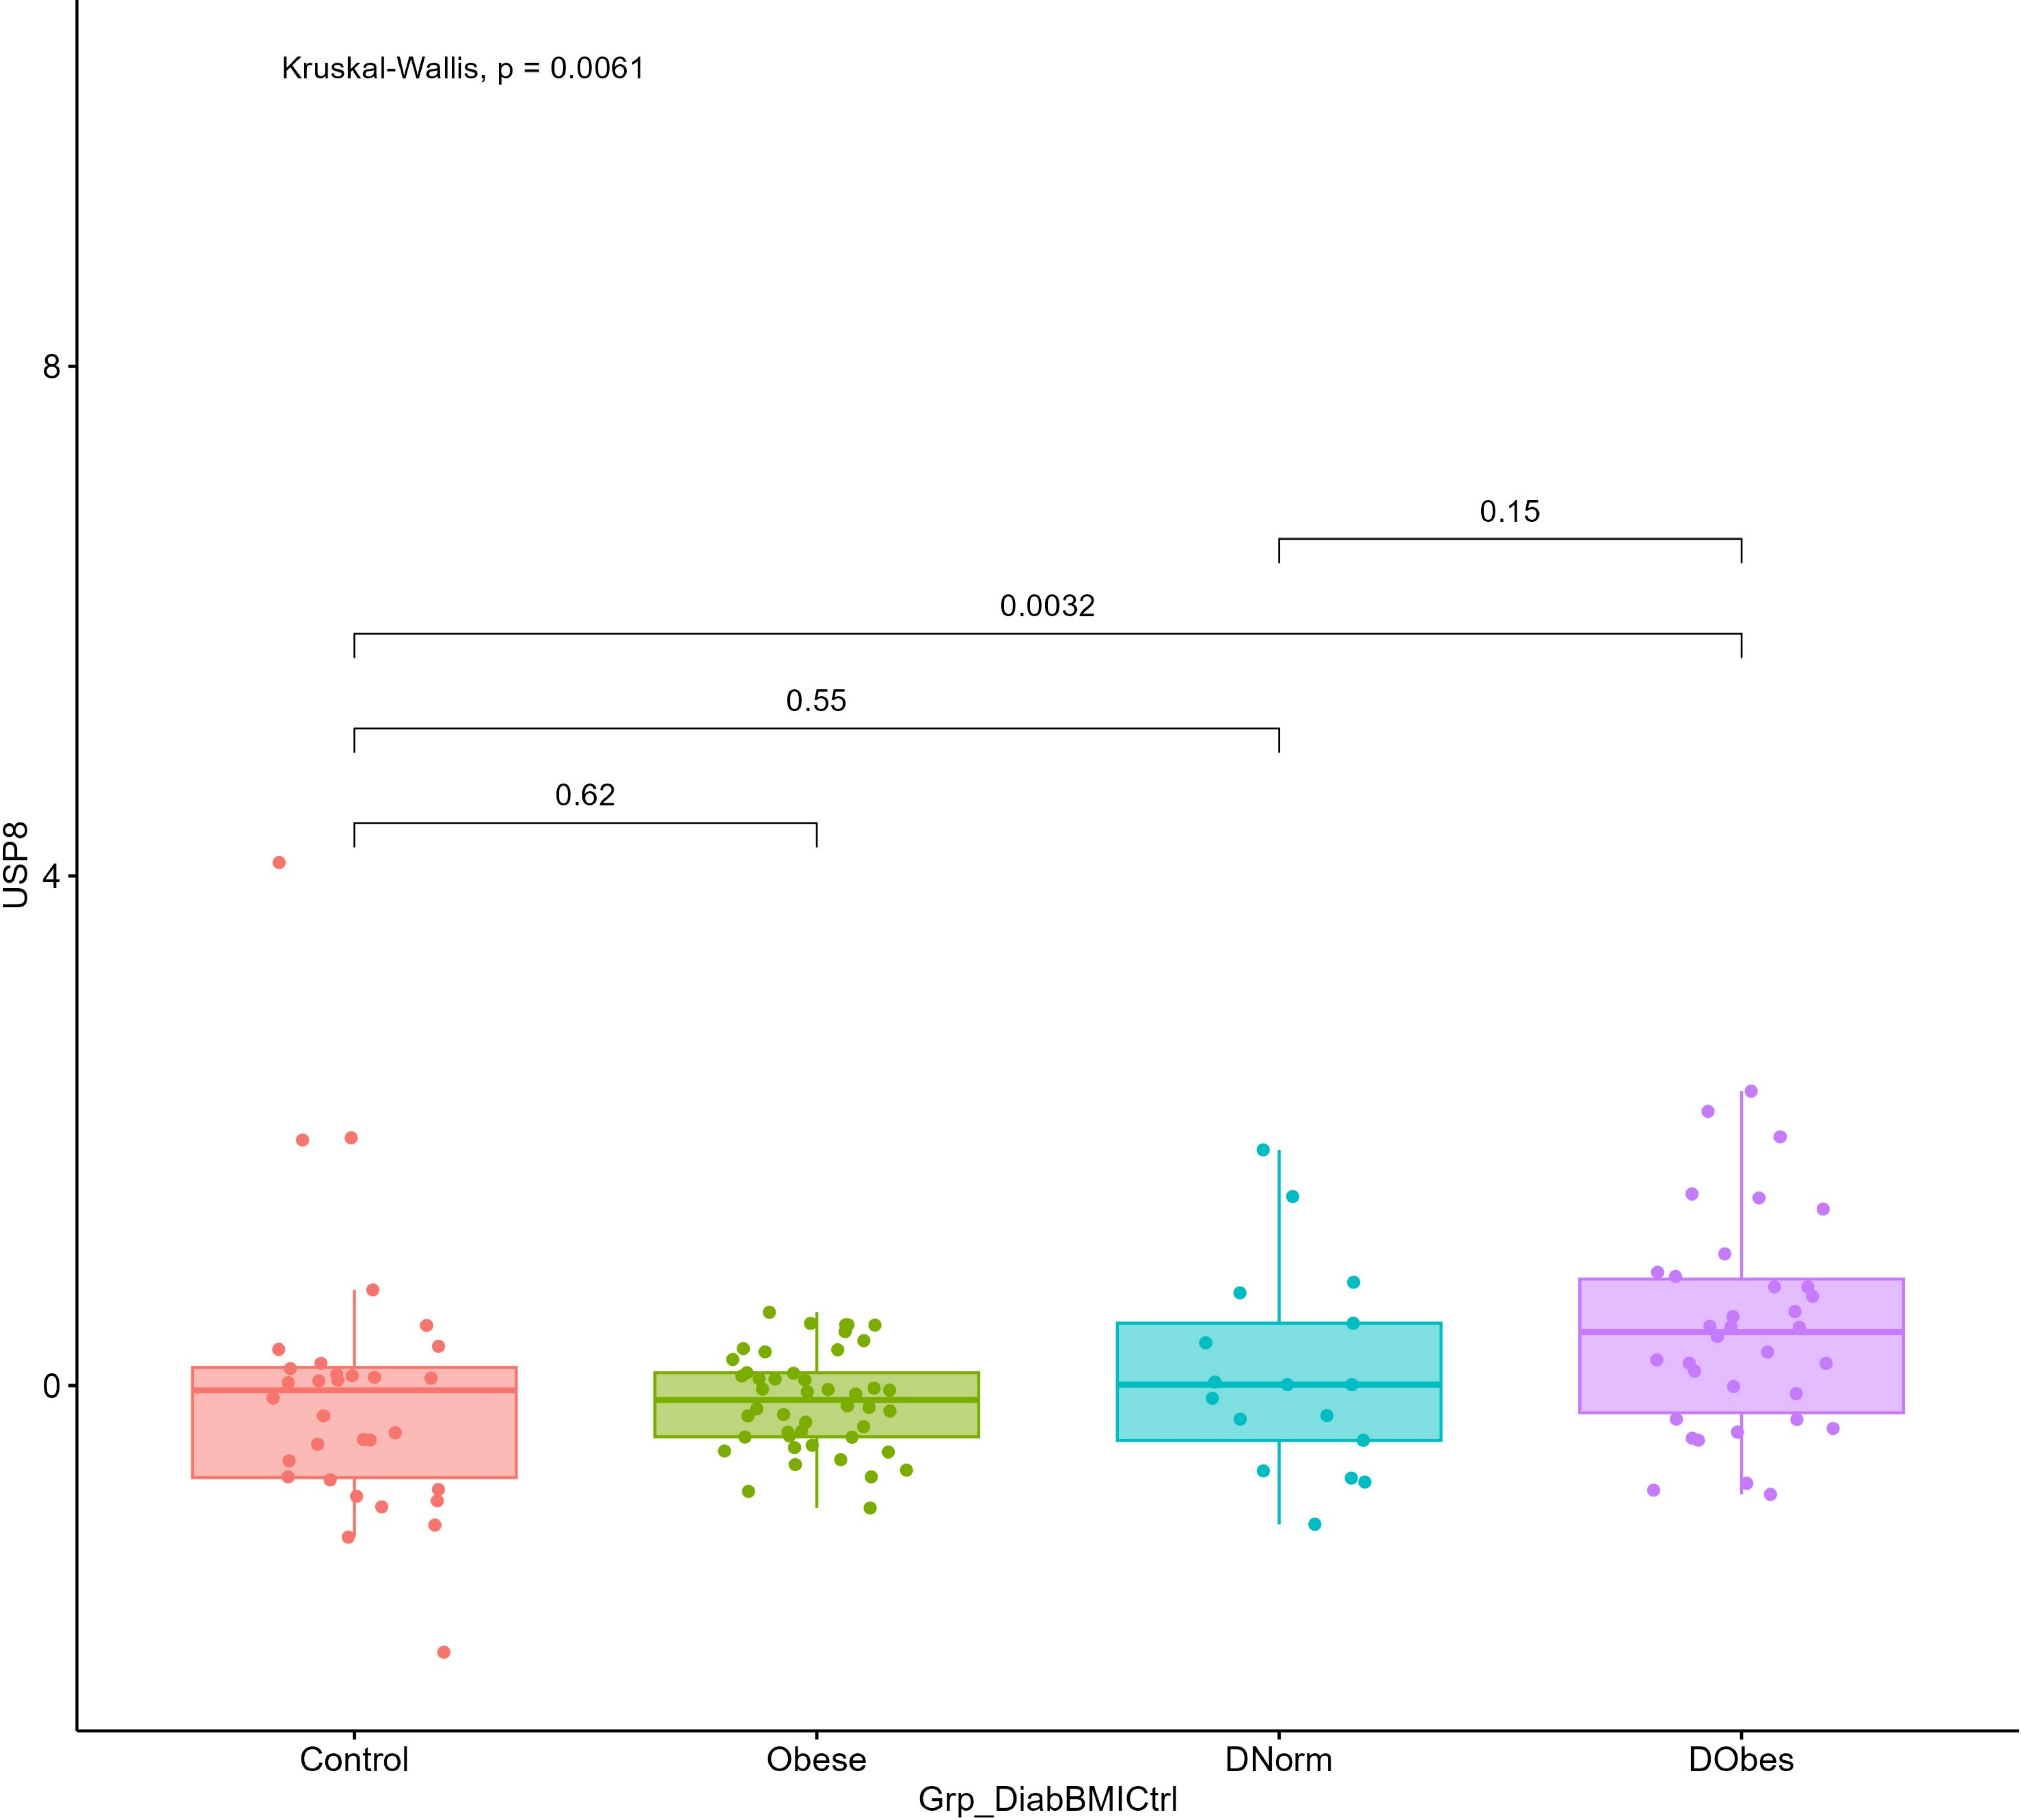

# Grp\_DiabBMICtrl

Grp\_DiabBMICtrl Control Obese DNorm DObes

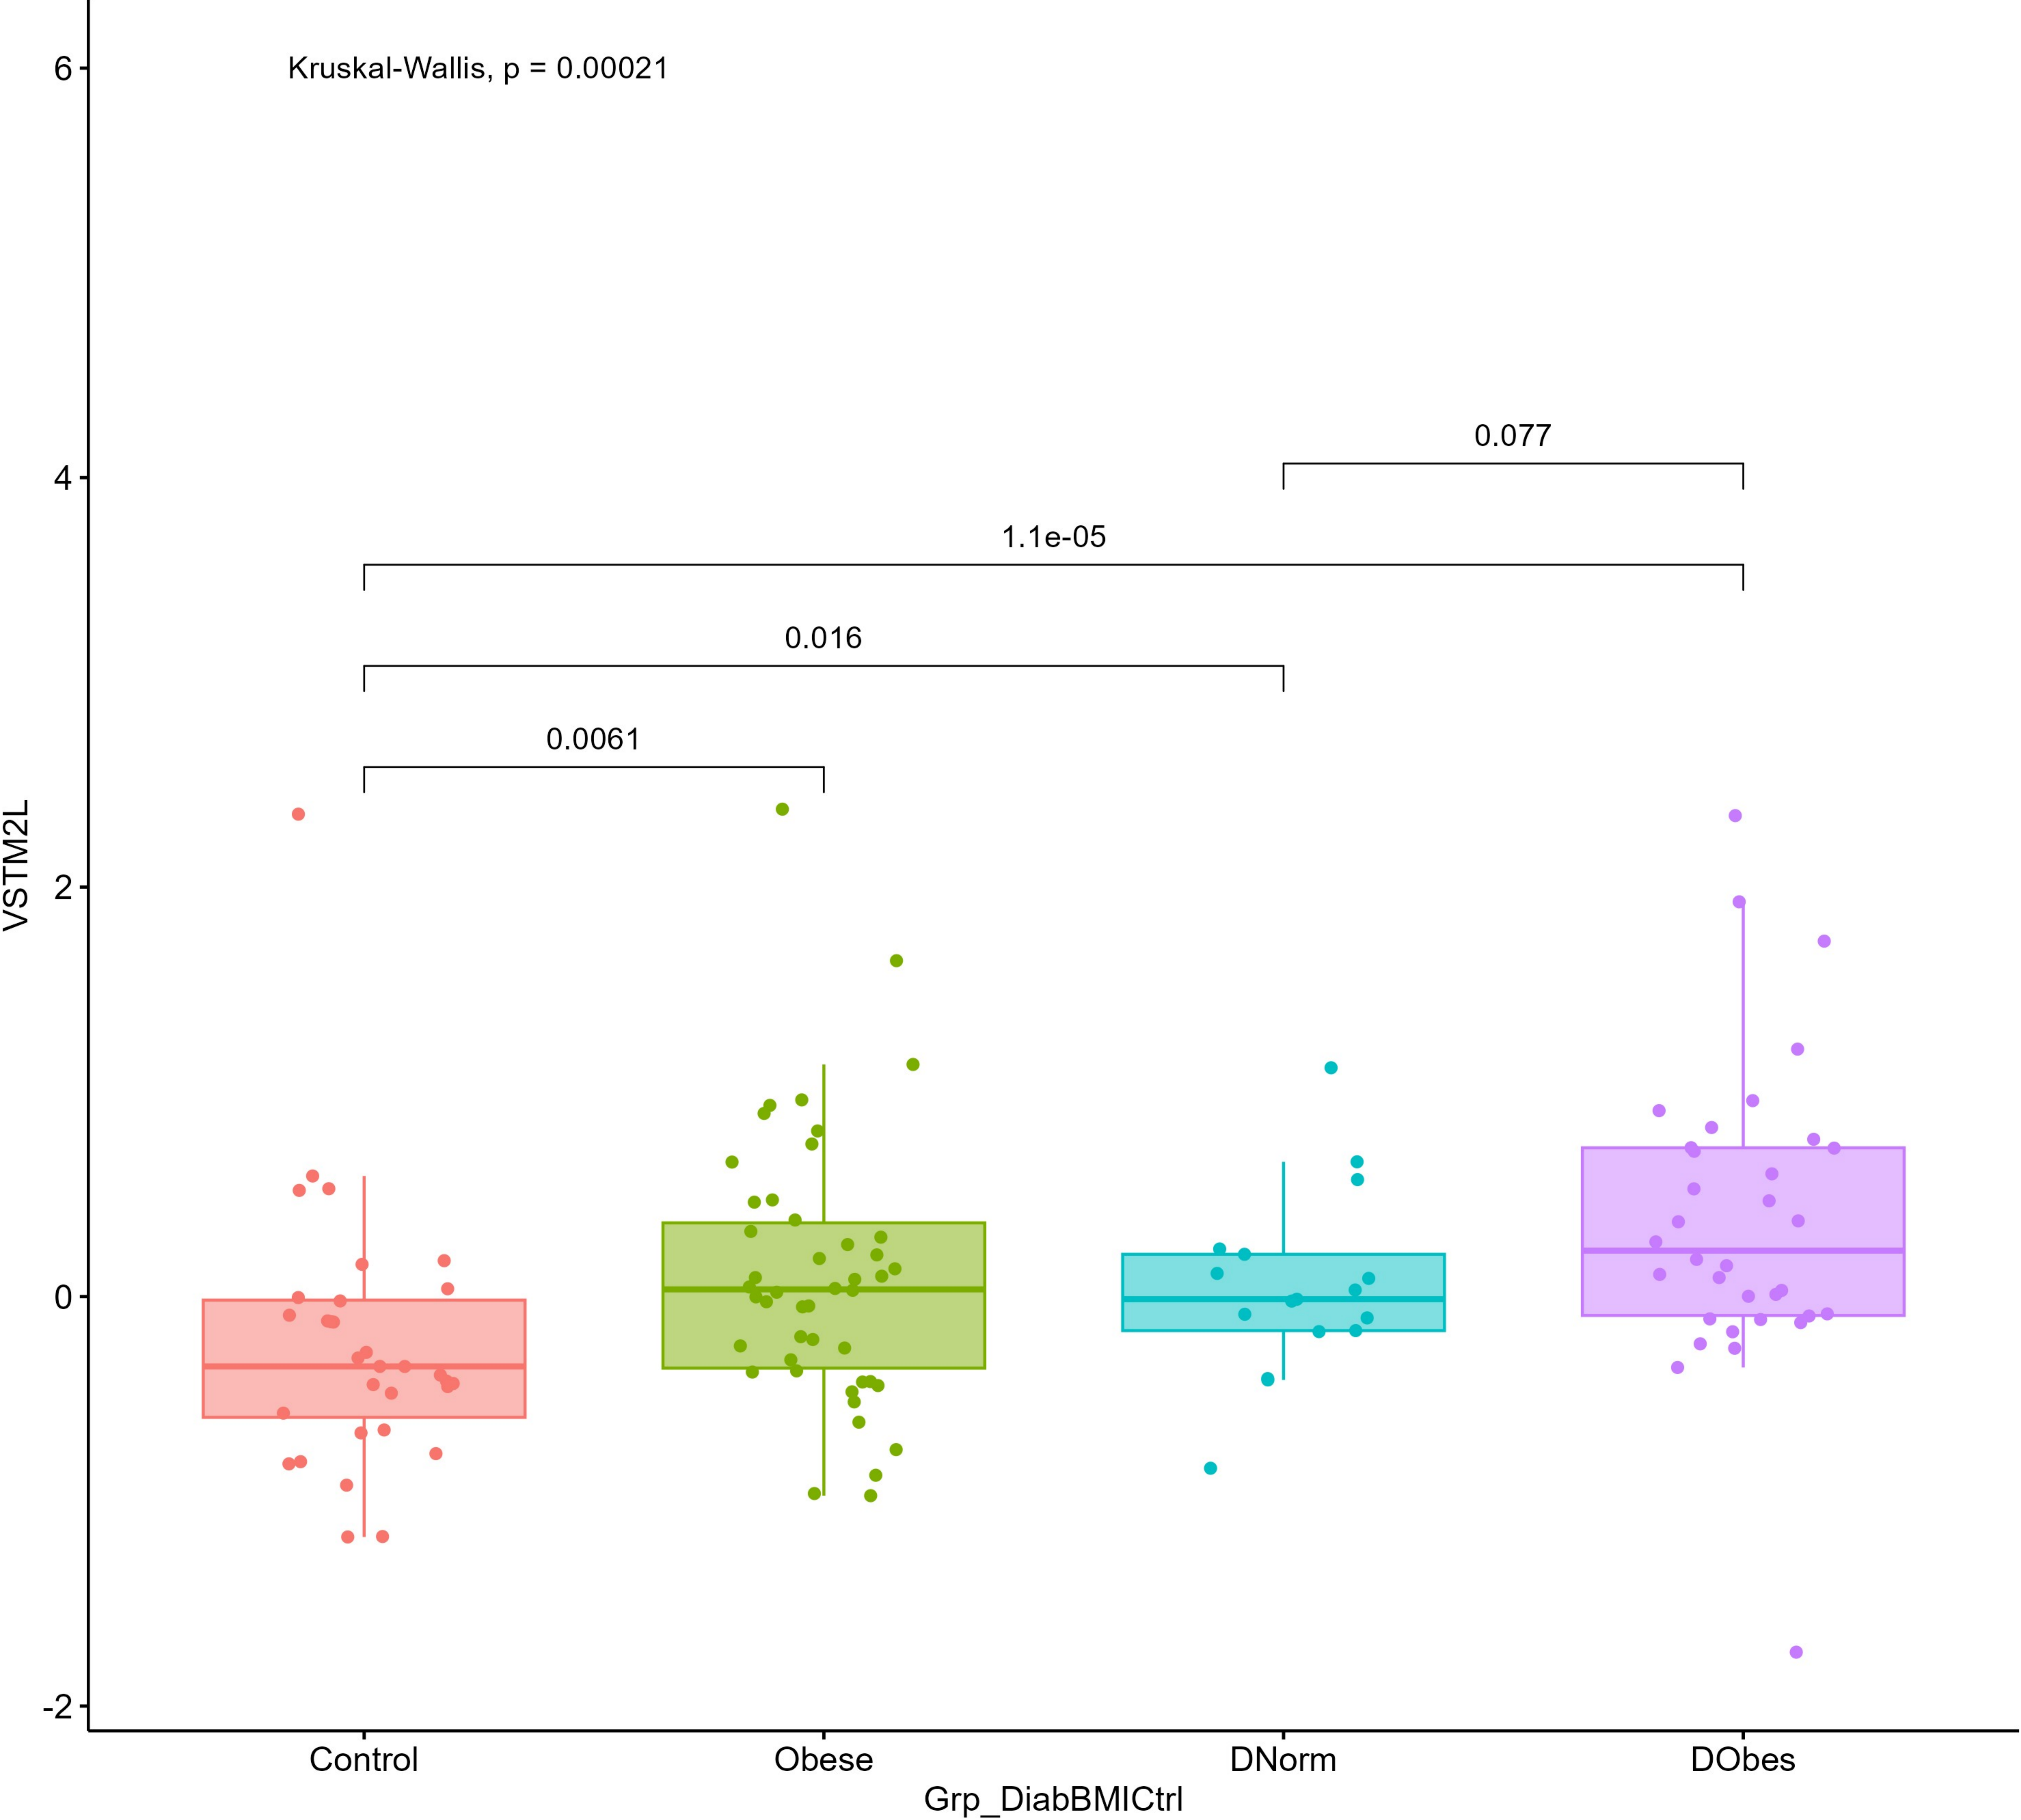

# Grp\_DiabBMICtrl

Grp\_DiabBMICtrl Control Obese DNorm DObes

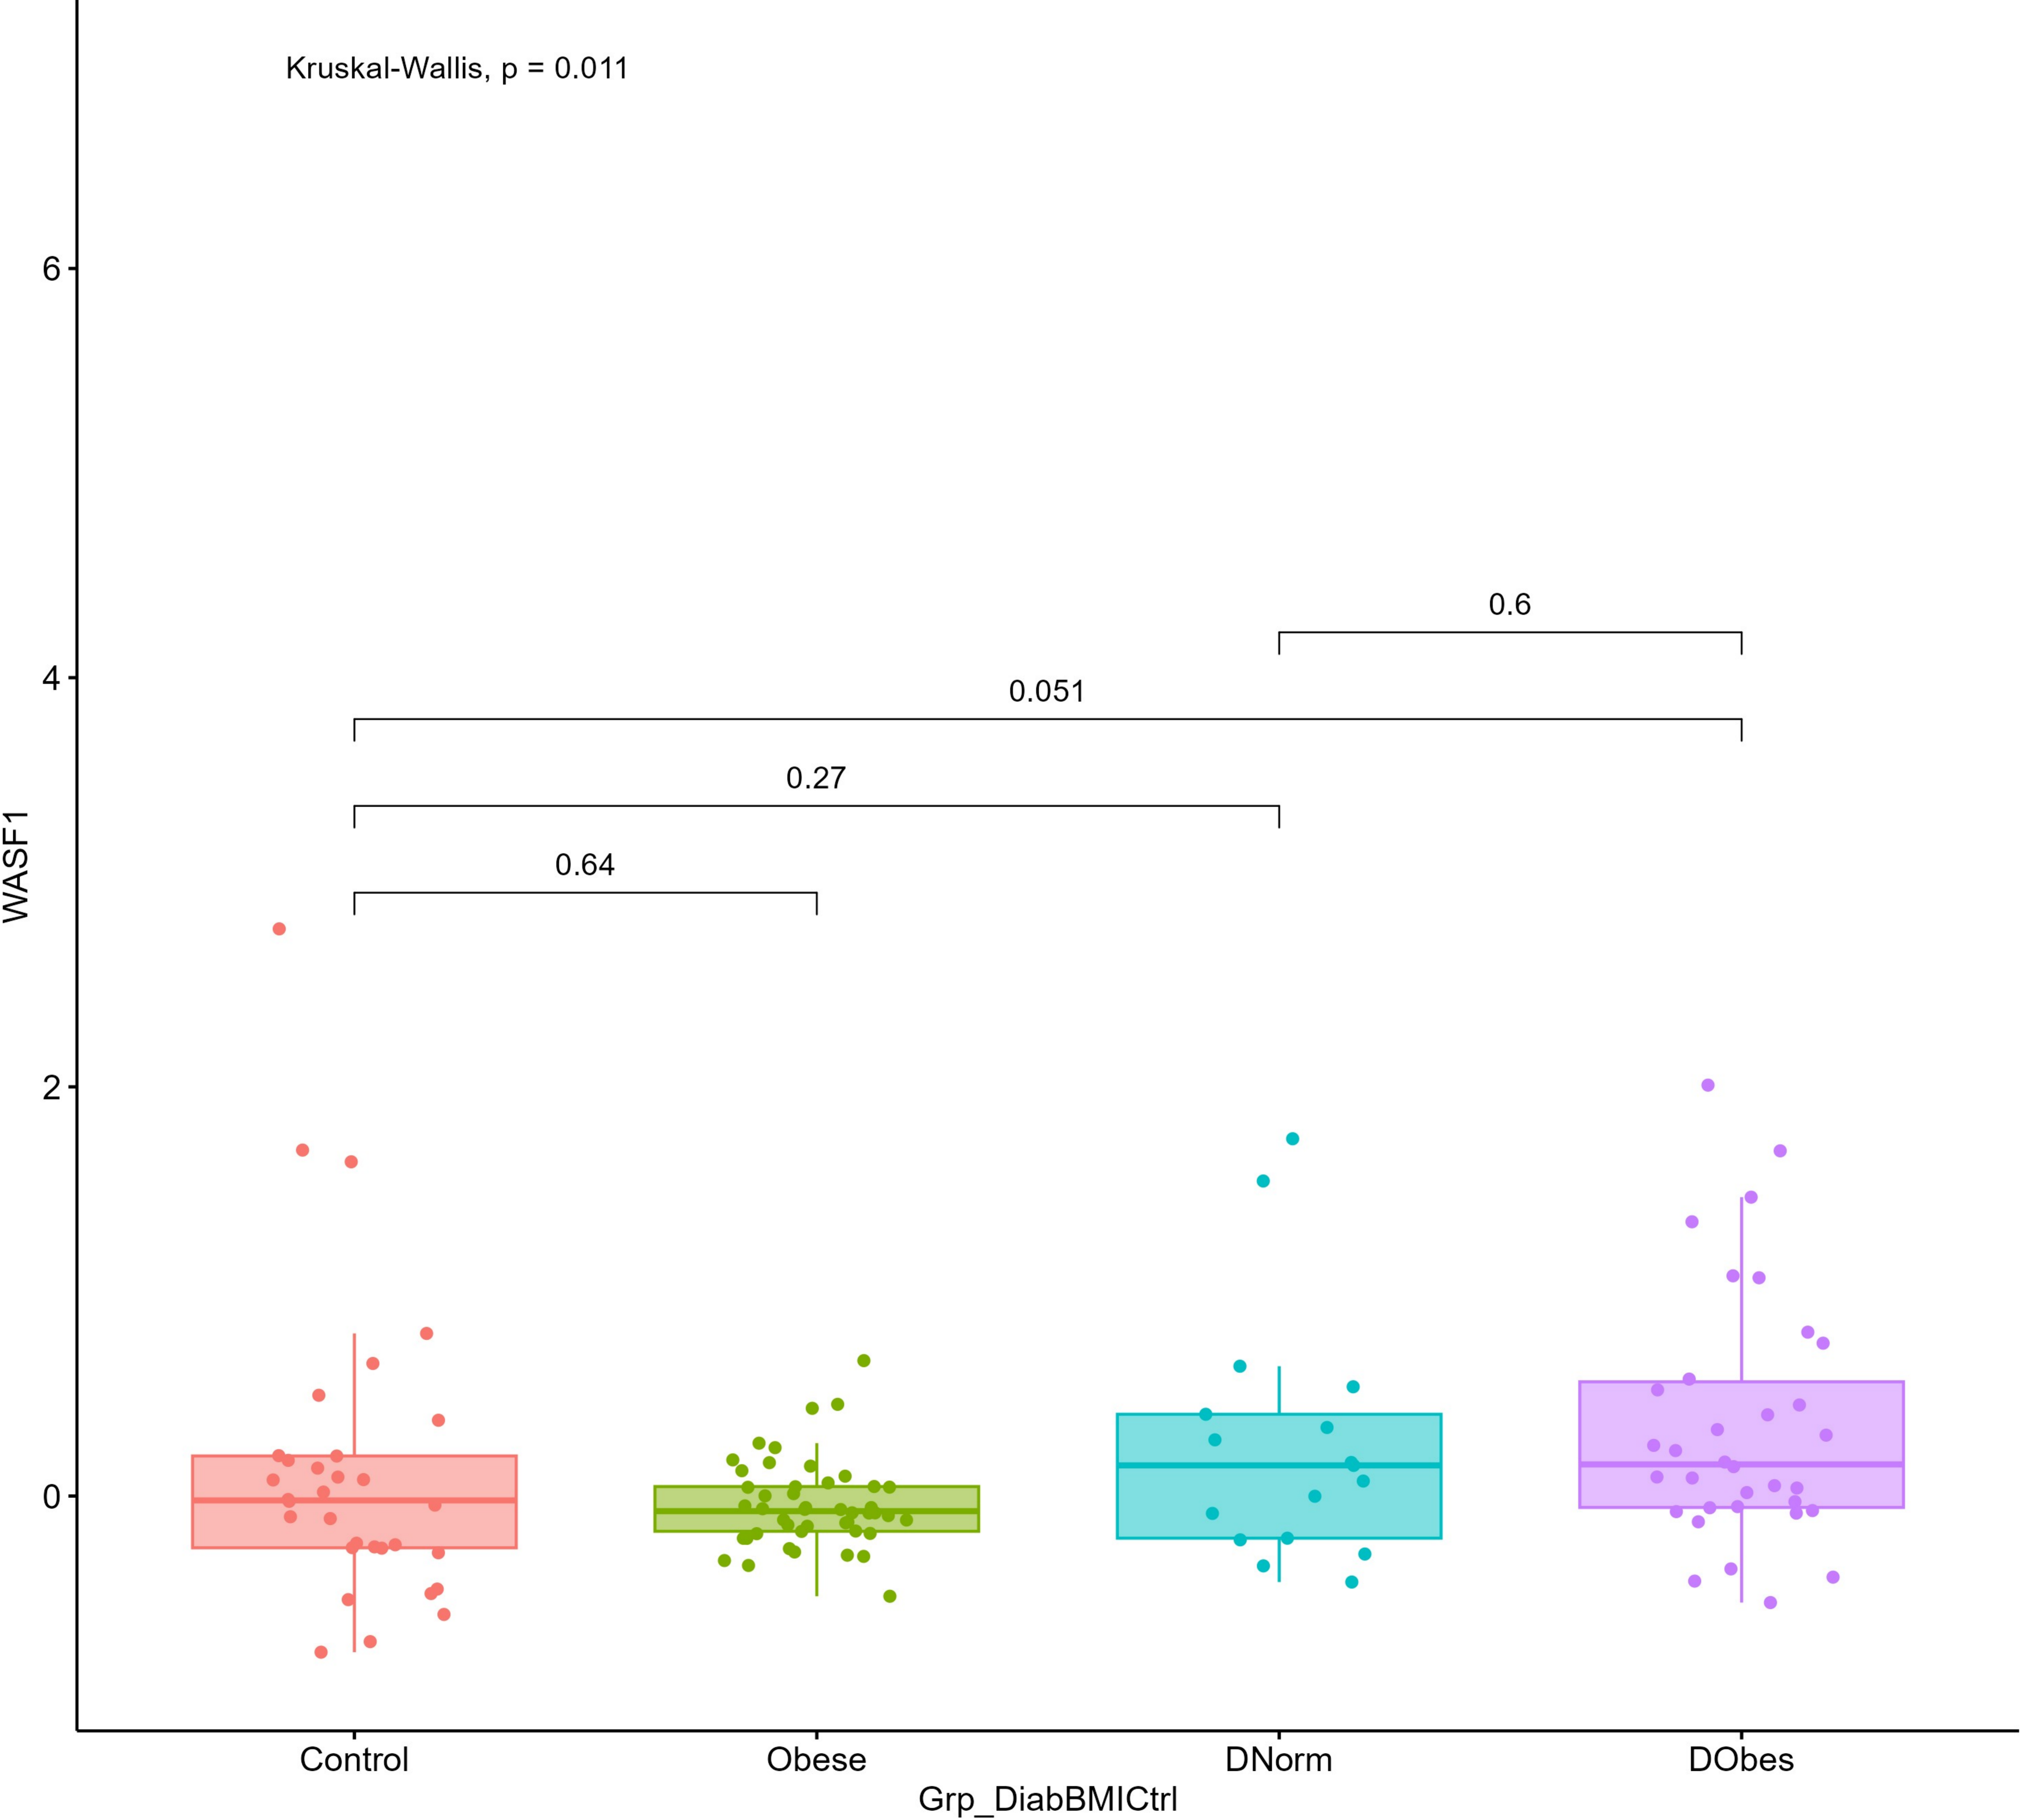

# Grp\_DiabBMICtrl

Grp\_DiabBMICtrl Control Obese DNorm DObes

Kruskal-Wallis, p = 0.007

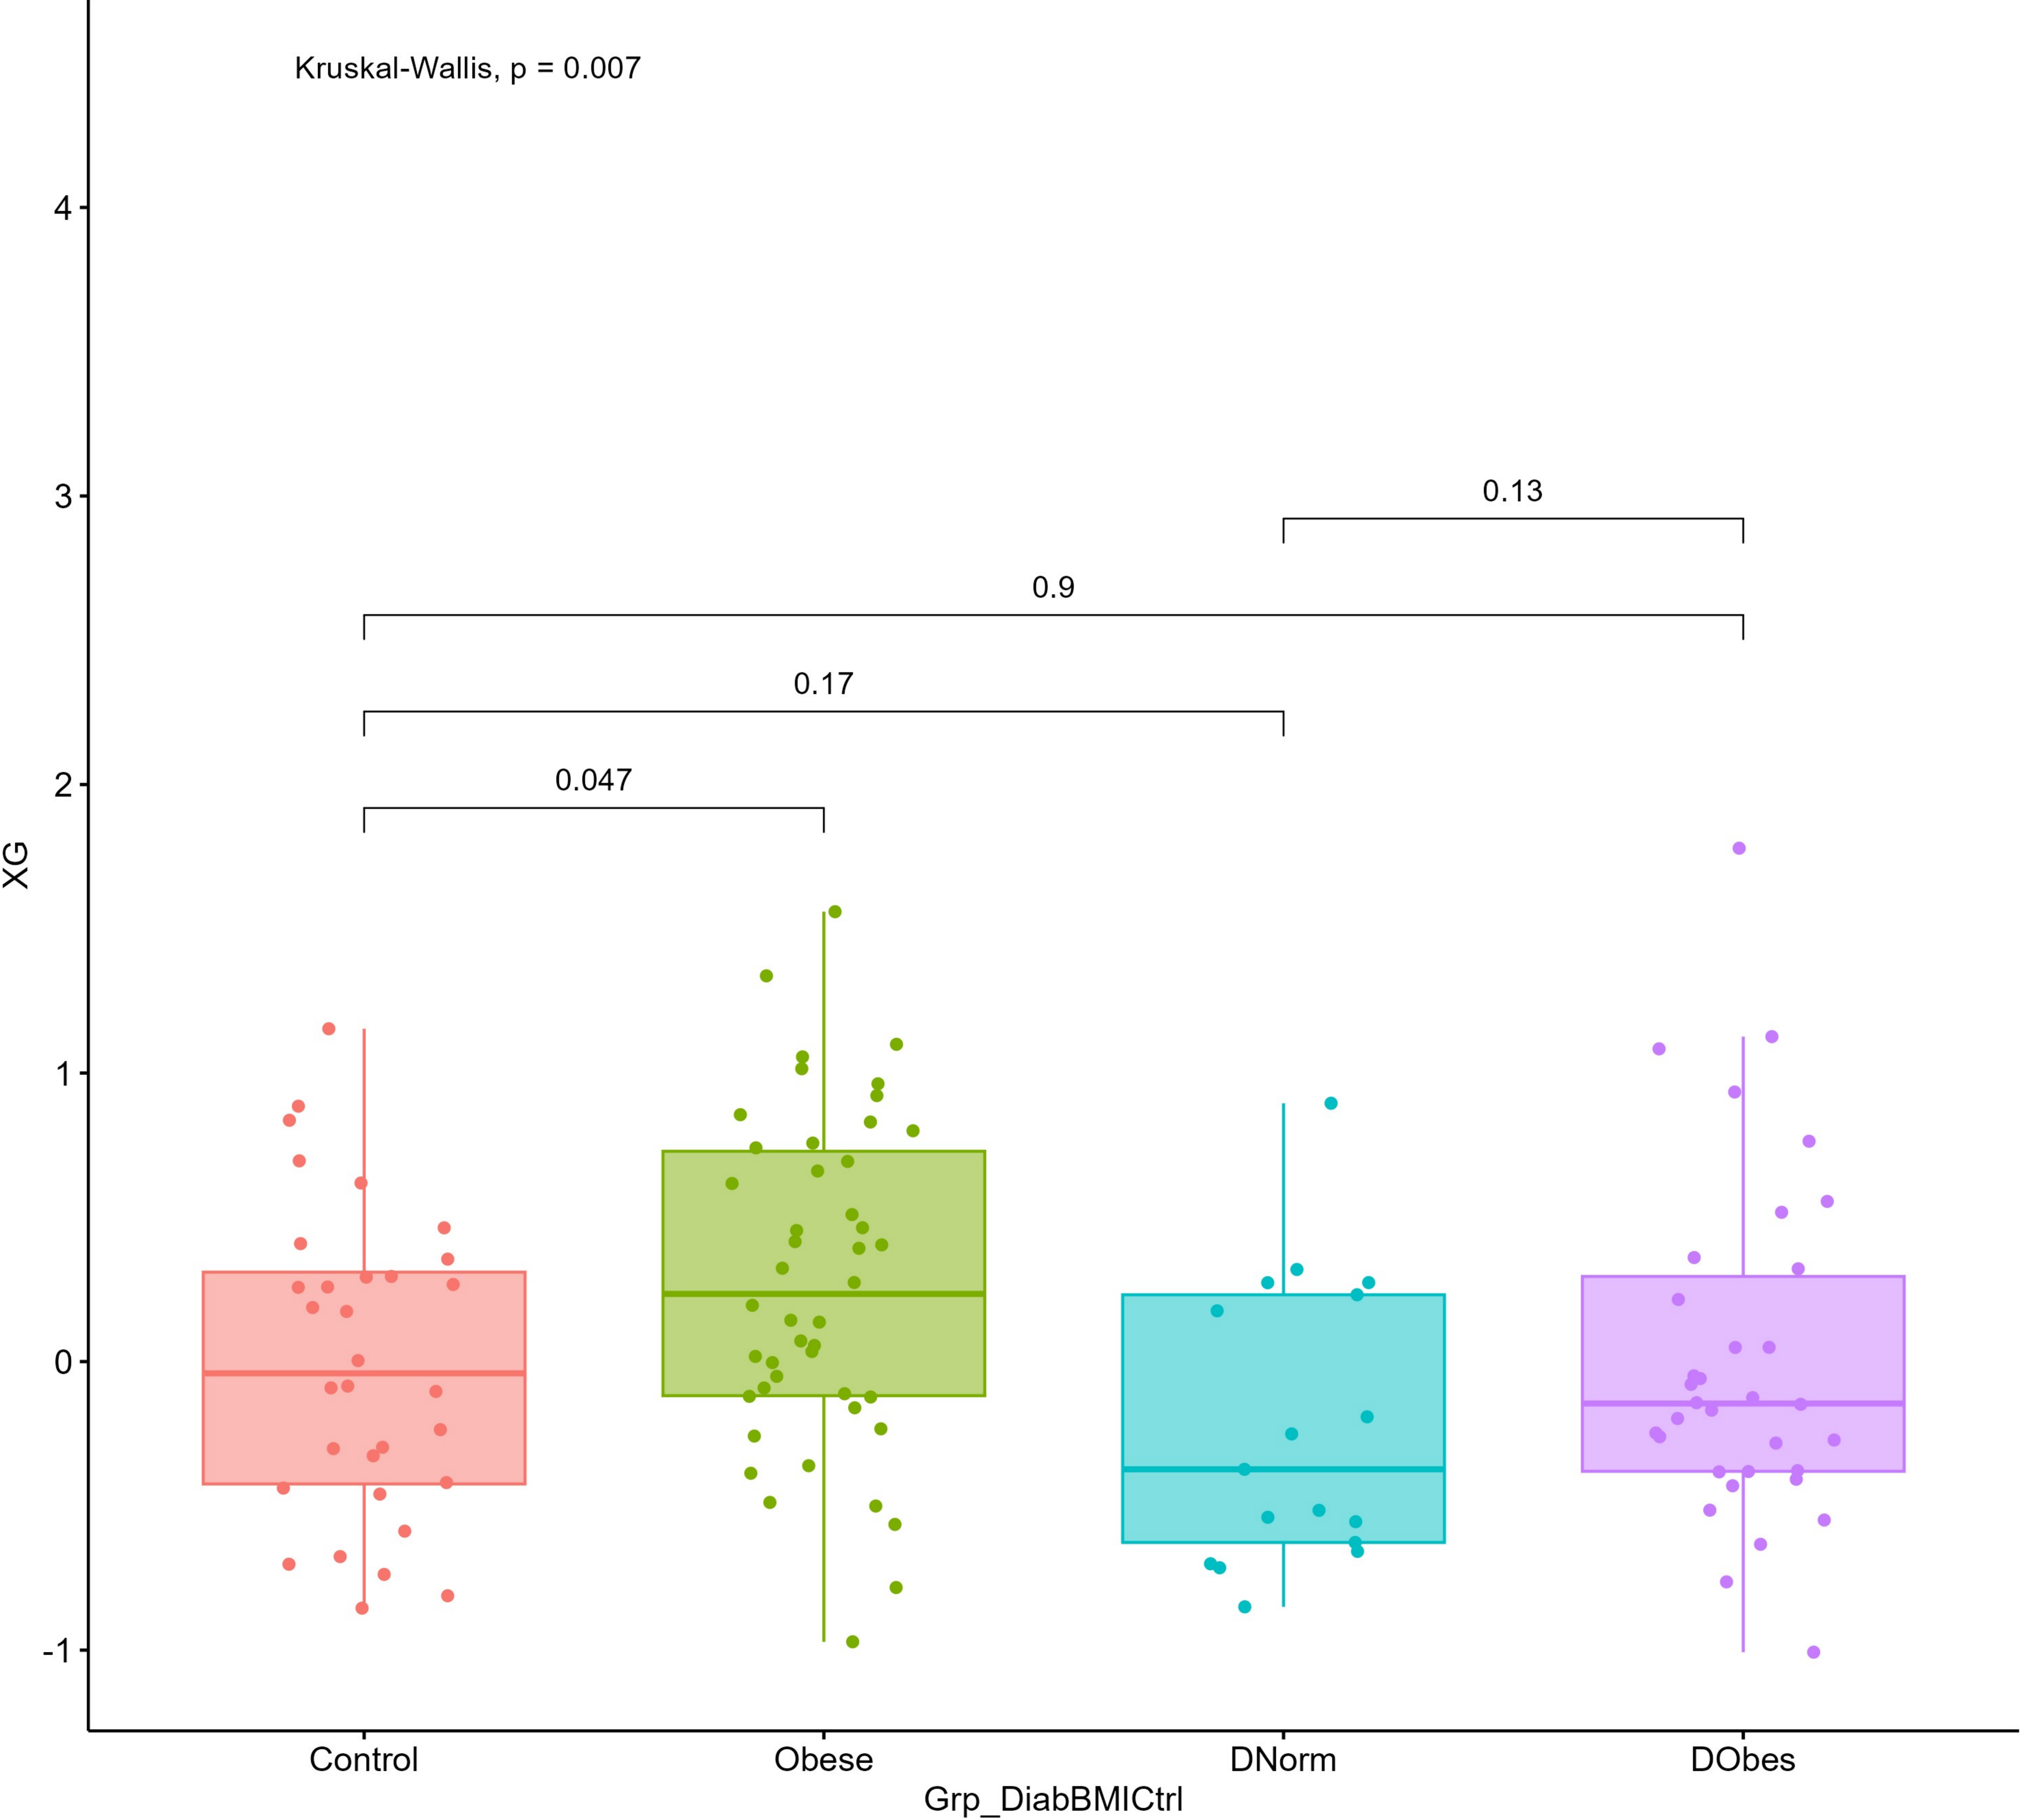

Supplement: s1 [file s1]
