# Supplementary material for: Examination of the Complex Molecular Landscape in Obesity and Type 2 Diabetes
Source: Int J Mol Sci. 2024 Apr 27;25(9):4781. doi: 10.3390/ijms25094781 (PMC11084226; doi:10.3390/ijms25094781)
Supplement: Supplementary file 1 [file ijms-25-04781-s001.zip › TableS2.xlsx]

## Sheet: Control
	CNDP1	LDLR	PRCP	COMP	SSC5D	CES1	MEGF9	ACP5	TFPI	SIGLEC7	CCL16	LGALS1	SORT1	SEMA3F	MARCO	SOST	PAM	ACTA2	TFF3	SCARF1	CCL15	ALCAM	LTBP2	MCAM	CXCL8	F9	CTSD	PLXNB2	TNFSF13B	PLA2G2A	FETUB	C2	OSMR	GSTA1	REN	IL19	ACY1	ADH4	APOM	EGFR	NRCAM	STK11	FBP1	CBLIF	TCN2	TINAGL1	IL1RL1	AKR1C4	ACE2
Asp	0.557143	0.539286	0.746429	0.628571	0.703571	0.492857	0.614286	0.353571	0.675	0.739286	0.532143	0.525	0.764286	0.710714	0.717857	0.632143	0.539286	0.760714	0.710714	0.675	0.660714	0.739286	0.7	0.657143	0.717857	0.689286	0.767857	0.739286	0.721429	0.703571	0.542857	0.510714	0.425	0.728571	0.496429	0.7	0.539286	0.482143	0.407143	0.546429	0.567857	0.15	0.514286	0.417857	0.460714	0.232143	0.671429	0.557143	0.589286
Glu	0.475	0.564286	0.653571	0.517857	0.710714	0.442857	0.567857	0.596429	0.760714	0.617857	0.714286	0.546429	0.832143	0.892857	0.739286	0.828571	0.764286	0.764286	0.778571	0.785714	0.657143	0.7	0.703571	0.453571	0.646429	0.492857	0.607143	0.660714	0.464286	0.567857	0.378571	0.303571	0.342857	0.785714	0.703571	0.696429	0.564286	0.467857	0.4	0.360714	0.471429	0.232143	0.546429	0.296429	0.578571	0.517857	0.553571	0.317857	0.528571
Eth	0.221429	0.332143	0.303571	0.367857	0.267857	0.0642857	0.214286	0.139286	0.2	0.157143	0.114286	0.0571429	0.317857	0.546429	0.507143	0.507143	0.510714	0.528571	0.496429	0.342857	0.317857	0.528571	0.510714	0.417857	0.371429	0.25	0.3	0.342857	0.414286	0.253571	0.146429	0.214286	0.464286	0.546429	0.478571	0.539286	0.303571	0.160714	0.271429	0.271429	0.160714	0.371429	0.396429	0.517857	0.560714	0.375	0.182143	0.221429	0.217857
Cit	0.275	0.125	0.342857	0.0892857	0.3	0	0.25	0.0142857	0.496429	0.389286	0.378571	0.228571	0.625	0.510714	0.392857	0.489286	0.453571	0.742857	0.675	0.571429	0.625	0.396429	0.442857	0.353571	0.225	0.253571	0.289286	0.367857	0.296429	0.160714	0.296429	0.178571	0.325	0.546429	0.467857	0.475	0.242857	0.389286	0.55	0.239286	0.328571	0.0464286	0.332143	0.0107143	0.110714	0.214286	0.217857	0.175	0.217857
HbA1C	0.322264	0.508614	0.485928	0.501525	0.344545	0.464255	0.361965	0.241242	0.451291	0.306465	0.258662	0.38141	0.124166	0.187565	0.283374	0.281956	0.145637	0.324695	0.291273	0.192832	0.151713	0.205795	0.210454	0.408755	0.3251	0.31801	0.384448	0.463647	0.342114	-0.165892	0.329961	0.422528	0.45514	0.319833	0.146447	0.146244	0.452304	0.304642	0.0575254	0.296134	0.32429	0.333202	0.293299	0.195668	0.0352445	-0.136927	0.0526641	0.0854779	0.279654
Trigliceride	0.488591	0.753137	0.521728	0.351808	0.433178	0.513628	0.456926	0.441462	0.493746	0.202874	0.52946	0.464474	0.298236	0.404643	0.411086	0.505712	0.296947	0.23325	0.102542	0.243007	0.0833955	0.147829	0.171946	-0.0138072	0.201953	0.335975	0.298052	0.207292	0.203242	-0.0222756	0.0826591	0.0618563	0.0206188	0.428944	0.310202	0.380342	0.510498	0.541242	0.0986755	0.370401	0.326955	0.470365	0.136599	-0.0379238	0.103094	0.0108617	0.15777	0.0837637	0.303602
C.peptide	0.34505	0.49188	0.451835	0.378865	0.459399	0.574638	0.559066	0.622692	0.501669	0.285873	0.614238	0.427809	0.171079	0.493215	0.339711	0.38376	0.328142	0.338376	0.248498	0.248498	0.299221	0.0976641	-0.0487208	0.199555	0.145717	0.474972	0.442937	0.318799	0.293882	0.20267	0.179533	0.141268	0.0816463	0.244494	0.188877	0.121246	0.413126	0.279199	0.00244716	0.23693	0.172859	0.155951	0.334372	0.0522803	0.374416	0.277419	0.434928	0.143938	0.450773
Insulin	0.372567	0.575492	0.479677	0.331215	0.416541	0.541402	0.532728	0.706606	0.435502	0.277156	0.514171	0.388301	0.140999	0.452244	0.333434	0.39415	0.279173	0.151891	0.0917801	0.203933	0.270096	0.140393	-0.0556732	0.139587	0.12123	0.365305	0.438931	0.217852	0.208775	0.169642	0.252547	0.158346	-0.0829047	0.270499	0.283006	0.119213	0.404034	0.29652	-0.107716	0.299748	0.161573	0.151689	0.168432	0.203933	0.387494	0.158951	0.447	-0.0498235	0.320153
LDLC	0.449629	0.642852	0.554873	0.454405	0.505833	0.555975	0.417119	0.436772	0.58371	0.468731	0.443017	0.467262	0.387364	0.26008	0.420793	0.567546	0.287814	0.21508	0.0668566	0.313161	0.185509	0.191203	0.239141	0.194141	0.133897	0.34714	0.375242	0.317202	0.296447	0.354303	0.410507	0.215447	0.289834	0.186243	0.056571	0.109652	0.198549	0.250712	0.451282	0.631464	0.391956	0.399303	0.189182	0.366609	0.302324	0.123611	0.308018	0.432915	0.356265
Cholesterol	0.360235	0.488261	0.423881	0.376559	0.420213	0.499817	0.253852	0.378393	0.515774	0.468085	0.355833	0.346662	0.422964	0.214417	0.359134	0.504769	0.259171	0.175899	0.0423698	0.282465	0.17168	0.160858	0.212583	0.161225	0.0832722	0.290536	0.2865	0.290536	0.217902	0.490646	0.472487	0.213316	0.324101	0.067865	-0.0370506	-0.0425532	0.0544754	0.0592443	0.473404	0.536867	0.251284	0.313096	0.182318	0.349963	0.318782	0.152054	0.23606	0.366104	0.239384
Age	0.284037	0.358165	0.542202	0.428808	0.338532	0.428808	0.279083	0.402569	0.621101	0.414679	0.411009	0.486789	0.586973	0.373578	0.389175	0.427707	0.480734	0.571193	0.546239	0.570092	0.536331	0.349541	0.529358	0.487156	0.406606	0.593211	0.656331	0.528624	0.425321	0.204771	0.24789	0.430275	0.362569	0.197615	0.19156	0.0491743	0.219266	-0.0933946	0.254129	0.0510092	0.0436698	0.0955964	0.297064	0.303853	0.300551	0.305872	0.148257	-0.0697248	0.253143
CRP	0.276622	0.265869	0.369509	0.330389	0.243249	0.170942	0.231383	0.118287	0.285336	0.32631	-0.0342996	0.0302208	0.215439	0.158891	0.289229	0.0120512	0.0622956	0.222855	0.135901	0.0363391	0.0190966	0.2642	0.271801	0.312961	0.272543	0.454424	0.480566	0.455351	0.503556	0.472779	0.200977	0.559733	0.346148	-0.0194674	-0.0365245	0.033558	0.0370807	-0.228046	0.0311478	0.0838023	-0.0574751	-0.051913	0.262902	0.245289	0.214883	0.0947411	0.215995	0.0461655	-0.0514542
Tyr	0.589286	0.507143	0.432143	0.514286	0.403571	0.167857	0.232143	0.05	0.264286	0.360714	0	0.139286	0.428571	0.264286	0.428571	0.192857	0.210714	0.05	0.235714	0.1	0.171429	0.489286	0.278571	0.142857	0.239286	0.407143	0.385714	0.453571	0.482143	0.392857	0.503571	0.642857	0.353571	0.075	0.114286	0.232143	0.0892857	0.0392857	0.432143	0.471429	0.4	0.35	-0.292857	-0.157143	0.15	0.0321429	-0.05	-0.128571	-0.15
Ala	0.592857	0.528571	0.403571	0.414286	0.389286	0.378571	0.0857143	0.0964286	0.285714	0.253571	0.0535714	0.235714	0.485714	0.503571	0.417857	0.260714	0.275	0.2	0.207143	0.125	0.160714	0.446429	0.396429	0.267857	0.321429	0.496429	0.553571	0.367857	0.464286	0.442857	0.389286	0.375	0.114286	0.353571	0.0928571	0.228571	0.260714	0.167857	0.15	0.103571	0.1	0.157143	0.0821429	0.214286	0.446429	0.271429	0.0928571	-0.289286	-0.253571
Orn	0.375	0.189286	0.153571	0.132143	0.135714	0.142857	-0.0321429	-0.00714286	0.196429	0.0571429	-0.05	-0.0357143	0.342857	0.378571	0.332143	0.289286	0.342857	0.175	0.246429	0.0892857	0.0928571	0.325	0.260714	0.0892857	0.05	0.128571	0.167857	0.135714	0.175	0.192857	0.1	0.0285714	0.0678571	0.296429	0.196429	0.228571	0.0535714	0.114286	0.232143	0.0607143	0.00714286	0.0535714	-0.0107143	0.0142857	0.175	0.253571	-0.0285714	-0.235714	-0.271429
Leu	0.564286	0.464286	0.364286	0.371429	0.403571	0.175	0.371429	0.257143	0.189286	0.00357143	0.0142857	-0.0892857	0.314286	0.410714	0.396429	0.203571	0.189286	0.296429	0.117857	0.0714286	0.0892857	0.242857	0.253571	0.0714286	0.128571	0.353571	0.307143	0.264286	0.307143	0.125	0.05	0.135714	0.25	0.367857	0.414286	0.360714	0.464286	0.332143	0.414286	0.367857	0.239286	0.414286	0.214286	0.0928571	0.285714	0.157143	0.0857143	0.0321429	-0.0642857
Ile	0.660714	0.425	0.382143	0.314286	0.471429	0.25	0.507143	0.325	0.328571	0.1	0.121429	-0.107143	0.435714	0.375	0.417857	0.210714	0.196429	0.346429	0.121429	0.125	0.135714	0.171429	0.210714	-0.05	0.025	0.382143	0.307143	0.275	0.232143	0.171429	0.0642857	0.0678571	0.185714	0.414286	0.478571	0.385714	0.492857	0.478571	0.585714	0.464286	0.353571	0.421429	0.196429	-0.125	0.117857	0.0821429	0.05	0.128571	0.0178571
Phe	0.353571	0.475	0.407143	0.457143	0.328571	0.164286	0.271429	0.196429	0.167857	-0.0107143	-0.0464286	0.0392857	0.135714	0.325	0.328571	-0.0428571	-0.0928571	0.185714	0.0642857	-0.0928571	-0.00357143	0.285714	0.382143	0.142857	0.164286	0.146429	0.314286	0.225	0.353571	-0.00714286	-0.0571429	0.107143	0.214286	0.460714	0.471429	0.435714	0.510714	0.442857	0.0428571	0.289286	0.235714	0.232143	0.321429	0.342857	0.114286	-0.125	0.278571	-0.025	-0.217857
Cys	0.0964286	0.342857	0.292857	0.396429	0.160714	0.0785714	0.135714	0.0464286	0.0571429	0.160714	0.0392857	0.132143	-0.00357143	0.239286	0.271429	0.160714	0.114286	-0.196429	0.0821429	0.00357143	0.075	0.275	-0.025	0.0821429	0.260714	0.167857	0.0142857	0.378571	0.217857	0.0214286	0.15	0.432143	0.267857	-0.260714	0.1	-0.025	0.160714	-0.228571	-0.025	0.196429	0.303571	0.0464286	-0.0857143	-0.15	-0.075	-0.0607143	0.353571	0.0107143	0.0571429
Ser	-0.121429	-0.132143	0.05	-0.025	-0.139286	0.135714	0.0928571	-0.146429	0.0142857	0.189286	-0.189286	-0.289286	0.0392857	0.2	0.35	0.246429	0.296429	0.189286	0.139286	0.0892857	0.0178571	0.271429	0.164286	0.257143	0.167857	0.0285714	0.0357143	0.0857143	0.139286	0.0892857	-0.189286	-0.0714286	0.025	0.285714	0.157143	0.275	0.107143	-0.00357143	0.0285714	-0.0142857	-0.0535714	-0.1	0.342857	0.467857	0.0642857	-0.075	0.260714	0.414286	0.292857
Gly	-0.278571	-0.25	-0.135714	-0.0964286	-0.371429	-0.432143	-0.307143	-0.564286	-0.267857	-0.0964286	-0.328571	-0.217857	-0.221429	-0.0785714	-0.0107143	-0.0714286	-0.0678571	0.146429	0.175	-0.114286	0.0857143	0.110714	0.103571	0.335714	-0.0428571	-0.125	-0.167857	-0.0607143	0.117857	-0.185714	0.0107143	0.0642857	0.3	0.0178571	-0.0464286	0.0892857	-0.142857	-0.075	-0.0357143	-0.025	-0.0821429	-0.075	0.125	0.214286	-0.114286	-0.182143	0.0357143	0.114286	-0.0857143
ACR	0.000586261	-0.0351757	-0.0533498	0.0243298	0.020226	0.468423	0.0694719	0.0407451	0.143048	-0.0768002	-0.0685925	-0.0375207	0.0489528	-0.239194	-0.0715238	0.0407451	0.128391	0.172361	0.136306	0.104648	0.0348825	-0.127219	-0.0175878	0.155652	0.0172947	0.20226	0.118718	0.293424	-0.213399	0.098785	0.269094	0.249454	-0.0671269	-0.0375207	-0.256196	-0.198742	-0.123115	0.0161222	0.0170016	-0.106113	-0.00996644	0.0407451	-0.116373	0.0460215	-0.0896979	-0.184672	-0.368758	-0.167964	0.0664031
ApoA	-0.0117313	-0.206397	-0.0859683	-0.0208963	0.0557236	0.0377601	-0.260654	0.102832	0.043809	0.0698378	-0.0155806	-0.00898176	0.319311	0.0449088	-0.113463	-0.0647053	0.0203464	0.123362	-0.0153973	0.148291	0.107598	-0.0575566	0.115663	0.0601228	0.0370269	0.0801026	0.0648886	-0.0412428	-0.0768032	0.36312	0.21043	-0.0691046	0.0652552	-0.0260288	-0.150124	-0.242874	-0.15159	-0.195582	0.327009	-0.0665384	-0.180185	-0.102282	0.0203464	0.0361103	0.130877	0.167904	-0.0526075	0.108881	-0.0845096
HDLC	-0.209695	-0.464088	-0.315462	-0.234527	-0.209695	-0.183207	-0.430795	-0.143843	-0.144579	-0.0240965	-0.224962	-0.182839	0.108894	-0.168308	-0.286583	-0.26451	-0.137405	0.0110366	-0.0958343	-0.00956504	-0.035685	-0.157639	-0.0362368	0.042123	-0.10963	-0.100249	-0.112389	-0.177505	-0.142556	0.196635	0.0973059	-0.100801	0.0445142	-0.210247	-0.26635	-0.395845	-0.307737	-0.353539	0.187438	-0.26451	-0.332385	-0.254945	0.0607012	-0.019498	0.0426748	0.0796473	-0.13483	0.0715538	-0.201252
BMI	0.562959	0.383399	0.267081	0.165443	0.276115	0.255788	0.317899	0.351779	0.129305	0.193676	0.113495	-0.157538	-0.15528	0.241107	0.189159	0.0344438	-0.0649351	-0.00395257	-0.20271	-0.230943	-0.313382	-0.127047	-0.482778	-0.13834	-0.262564	0.256917	0.236589	-0.116883	0.181254	0.373235	0.221909	0.079616	-0.0728402	-0.102202	0.0310559	0.0220215	0.0739695	0.164314	-0.115754	0.174478	-0.132693	-0.207228	0.207228	-0.190288	0.192547	0.157538	0.455675	0.405985	0.189159
Tau	0.178571	-0.00714286	-0.0642857	-0.178571	-0.0892857	0.167857	-0.167857	-0.307143	-0.0178571	-0.171429	-0.121429	-0.160714	0.0571429	0.103571	-0.0535714	-0.228571	-0.246429	0.171429	-0.175	-0.267857	-0.0607143	-0.228571	-0.00714286	-0.0428571	-0.285714	0.167857	0.103571	-0.121429	-0.0642857	-0.0357143	-0.0392857	-0.317857	-0.228571	0.314286	0.0392857	-0.0107143	0.275	0.442857	-0.132143	-0.242857	-0.185714	-0.167857	0.425	0.0535714	-0.175	-0.171429	0.0321429	-0.142857	-0.389286
GFR	-0.224983	-0.385559	-0.369678	-0.250128	-0.38997	-0.20072	-0.35512	-0.217483	-0.555399	-0.390853	-0.500697	-0.464082	-0.504226	-0.233806	-0.290272	-0.32027	-0.267774	-0.370119	-0.464965	-0.373648	-0.427467	-0.415998	-0.357326	-0.290272	-0.293801	-0.161017	-0.307918	-0.285861	-0.223659	0.040144	-0.198955	-0.171605	-0.286743	-0.42835	-0.438055	-0.349385	-0.485698	-0.307035	-0.198955	-0.35909	-0.440261	-0.501138	-0.314976	-0.13499	-0.134549	-0.0529371	-0.0952869	0.0807291	-0.102576
His	0.0607143	-0.153571	-0.339286	-0.367857	-0.296429	0.0821429	-0.303571	-0.628571	-0.332143	-0.328571	-0.45	-0.482143	-0.196429	-0.328571	-0.35	-0.489286	-0.421429	-0.275	-0.525	-0.532143	-0.325	-0.482143	-0.535714	-0.485714	-0.617857	0.0178571	-0.207143	-0.253571	-0.207143	-0.239286	-0.0178571	-0.132143	-0.278571	-0.292857	-0.278571	-0.432143	-0.160714	-0.103571	-0.0357143	-0.253571	-0.275	-0.0714286	-0.185714	-0.264286	-0.460714	-0.353571	-0.542857	-0.328571	-0.607143
[truncated: 181 more columns]

## Sheet: Type 2 Diabetes
	ST6GAL1	PAG1	CTSD	GPR37	F9	LDLR	SORT1	SOST	SERPINE1	SDC4	PDGFA	CTSL	MARCO	CCL27	TFPI	SELP	AZU1	OSMR	KYAT1	QDPR	COMT	CLC	RNASE3	NADK	CEBPB	PAM	PLXNB2	CCDC80	GPNMB	IGFBP7	PRCP	SELE	CDH2	TIMD4	ITGB2	NRCAM	AXL	ALCAM	SPON2	IGFBPL1	CDH6	ROR1	GUSB	ACY1	SSC5D	SIGLEC7	SDC1	ICAM3	ACE2
Phe	0.507826	0.351304	0.416522	0.349565	0.594783	0.213913	0.42087	0.657391	0.450435	0.555652	0.422609	0.363122	0.610435	0.33913	0.364348	0.448696	0.490435	0.293043	0.235652	0.0791304	0.0704348	0.343478	0.437391	0.467826	0.496522	0.415652	0.477391	0.444348	0.546957	0.378261	0.266087	0.514783	0.409565	0.594783	0.493913	0.517391	0.54	0.26087	0.21913	0.326957	0.241739	0.306087	0.409565	0.313913	0.427826	0.384348	0.481739	0.461739	0.222609
Tyr	0.230435	0.21913	0.425217	-0.111304	0.195652	-0.0365217	0.143478	0.102609	0.42087	0.206087	0.17913	0.430094	0.457391	0.125217	0.442609	0.226957	0.395652	0.463478	0.363478	0.470435	0.349565	0.370435	0.163478	0.153913	0.307826	0.113913	0.378261	0.485217	0.477391	0.633913	0.596522	0.44087	0.427826	0.456522	0.628696	0.605217	0.491304	0.390435	0.286087	0.293043	0.443478	0.118261	0.534783	0.543478	0.613043	0.388696	0.505217	0.427826	0.141739
Eth	0.470435	0.206087	0.154783	-0.0443478	0.053913	0.0304348	0.0365217	0.307826	0.203478	0.183478	0.108696	0.731463	0.505217	0.32087	0.298261	-0.175652	0.0626087	0.35913	0.0104348	0.19913	0.093913	0.34087	0.104348	0.0930435	0.0347826	0.142609	0.0747826	0.416522	0.214783	0.325217	0.192174	0.163478	0.254783	0.4	0.23913	0.253913	0.317391	0.0643478	0.133913	-0.0182609	0.0782609	0.046087	-0.0791304	-0.0269565	-0.0382609	0.0391304	0.0669565	0.218261	-0.0373913
Orn	0.306957	0.0730435	0.304348	-0.148696	-0.145217	0.0530435	0.106957	0.118261	0.194783	0.149565	0.125217	0.63666	0.226957	0.247826	0.24	-0.12	-0.1	0.310435	0.0313043	0.141739	-0.0452174	0.093913	-0.0626087	0.0165217	-0.0782609	0.0356522	0.115652	0.226087	0.213913	0.305217	0.206957	0.129565	0.191304	0.288696	0.404348	0.310435	0.33913	0.19913	0.15913	0.086087	0.243478	0.152174	-0.0113043	-0.0495652	0.0391304	0.118261	0.193913	0.157391	-0.0417391
Tau	0.544348	0.52	0.386957	0.382609	0.308696	0.398261	0.496522	0.422609	0.582609	0.805217	0.643478	0.505327	0.45913	0.4	0.485217	0.589565	0.34087	0.305217	0.265217	0.20087	0.306087	0.173913	0.376522	0.43913	0.24087	0.475652	0.32	0.355652	0.204348	0.222609	0.0234783	0.0982609	0.0886957	0.206087	0.14	0.073913	0.133043	0.181739	0.146957	-0.0643478	0.0565217	0.130435	0.233043	0.00782609	0.28	0.150435	0.214783	0.227826	-0.10087
Asp	0.522609	0.703478	0.467826	0.306957	0.441739	0.303478	0.394783	0.366087	0.496522	0.654783	0.582609	0.432268	0.458261	0.344348	0.47913	0.573913	0.469565	0.303478	0.106957	0.146087	0.336522	0.355652	0.353913	0.36087	0.358261	0.374783	0.403478	0.291304	0.150435	0.287826	0.122609	0.353043	0.238261	0.36087	0.206087	0.18087	0.211304	0.0730435	0.02	-0.0104348	0.0965217	-0.0643478	0.27913	0.12	0.409565	0.213043	0.198261	0.229565	0.0869565
Glu	0.64087	0.574783	0.52087	0.269565	0.410435	0.22087	0.492174	0.434783	0.434783	0.552174	0.453043	0.649272	0.576522	0.636522	0.29913	0.396522	0.184348	0.144348	0.268696	0.262609	0.269565	0.405217	0.237391	0.495652	0.142609	0.25913	0.222609	0.332174	0.191304	0.44	0.328696	0.373913	0.34	0.408696	0.233913	0.112174	0.227826	0.101739	0.121739	0.0843478	-0.0826087	-0.0113043	0.294783	0.383478	0.391304	0.368696	0.450435	0.334783	0.369565
Ala	0.72	0.433043	0.48087	0.371304	0.496522	0.221739	0.398261	0.496522	0.54087	0.533913	0.404348	0.469667	0.512174	0.422609	0.26087	0.329565	0.0417391	0.205217	0.126957	0.210435	0.327826	0.184348	0.36087	0.364348	0.0478261	0.161739	-0.00869565	0.2	0.109565	0.146957	0.116522	0.0191304	0.121739	0.195652	0.000869565	0.0304348	0.0426087	-0.04	0.0286957	0.0486957	-0.293043	-0.0947826	0.22	0.311304	0.170435	0.331304	0.146087	0.207826	0.328696
ACR	0.131476	0.226372	0.190251	0.321115	0.132395	0.249637	0.102396	0.12566	0.0913754	-0.260963	-0.202801	-0.156054	0.202495	0.266473	-0.0551007	0.0287748	-0.113416	-0.0831103	0.387236	0.265555	0.276728	0.239841	0.058468	0.249886	0.141578	0.253769	0.161629	0.226831	0.188414	0.280959	0.2403	0.230199	0.233413	0.127497	0.132548	0.0921406	0.334737	0.23479	0.428408	0.285452	0.379889	0.292493	0.260198	0.275657	0.0990282	0.14969	0.34591	0.323258	0.287136
Abdomen	0.410045	0.405199	0.346052	0.458696	0.399629	0.251172	0.243926	0.174136	0.318426	0.307466	0.159009	0.240172	0.305654	0.0991373	0.365753	0.381423	0.314214	0.282693	0.401939	0.333552	0.289713	0.265302	0.351124	0.228125	0.305971	0.522362	0.477707	0.47979	0.378162	0.504122	0.379294	0.408641	0.424855	0.388261	0.324359	0.445008	0.34655	0.334685	0.416295	0.358507	0.332058	0.232105	0.311134	0.318833	0.246371	0.417518	0.261498	0.229982	0.163629
Waist	0.281677	0.248528	0.397111	0.347033	0.221991	0.241147	0.156236	0.180464	0.280455	0.164161	0.115615	0.195865	0.188208	-0.0274885	0.242279	0.198442	0.195408	0.308532	0.2805	0.237931	0.17358	0.227606	0.295444	0.0524421	0.170954	0.378997	0.315778	0.451001	0.367992	0.402283	0.361199	0.335341	0.370438	0.443484	0.252106	0.414591	0.263246	0.319582	0.463138	0.423422	0.341092	0.216828	0.310117	0.218142	0.109909	0.330948	0.199031	0.138012	0.111267
BMI	0.340777	0.373809	0.319419	0.37875	0.292043	0.253128	0.223761	0.218874	0.343628	0.241996	0.18462	0.0988733	0.172266	-0.0124437	0.36304	0.303808	0.256205	0.204711	0.336976	0.215435	0.208376	0.13679	0.347836	0.1858	0.328967	0.412815	0.312315	0.399511	0.333175	0.322051	0.254621	0.357067	0.322405	0.348922	0.261997	0.391728	0.224847	0.242358	0.293989	0.303536	0.23091	0.119324	0.246521	0.285301	0.152492	0.295527	0.100319	0.103082	0.120772
Cys	0.25913	0.307826	0.187826	0.0130435	-0.145217	0.30087	0.164348	0.122609	0.210435	0.33913	0.247826	0.392259	0.244348	0.247826	0.130435	0.117391	0.12	-0.0686957	0.246957	0.12087	-0.0426087	0.111304	0.026087	0.026087	0.0817391	0.326957	0.293043	0.116522	0.187826	0.351304	0.238261	0.233043	0.236522	0.245217	0.194783	0.168696	0.0452174	0.135652	0.170435	0.0173913	-0.0382609	0.236522	-0.0191304	-0.0843478	0.150435	0.0782609	0.114783	0.0121739	-0.234783
Age	0.101924	0.201944	0.216583	0.152051	-0.0205298	0.114523	0.172668	0.000407877	0.101108	0.0062088	0.122998	0.367302	0.0973467	0.335909	0.172849	0.126079	0.0932226	0.122726	0.201854	0.239741	0.160522	0.225647	0.0464073	0.149898	-0.0515738	0.173982	0.269879	0.228728	0.266978	0.289191	0.298521	0.171354	0.185539	0.148875	0.161655	-0.0143663	0.137545	0.0558792	0.259183	0.0702455	0.266616	0.179194	0.232717	0.0322676	0.172033	0.137273	0.214271	0.00179017	0.102558
HbA1C	0.281063	0.29243	0.341297	0.427899	0.33867	0.253527	0.237042	0.231879	0.227486	0.125767	0.1937	0.115489	0.170558	0.166754	0.295374	0.415299	0.233192	0.232196	0.0654877	0.103032	0.144336	0.152669	0.257059	0.0949502	0.179887	0.0925251	0.292068	0.0100541	0.139807	0.271467	0.26494	0.386812	0.231698	0.119064	0.277575	0.2783	0.235185	0.223319	0.202486	0.415933	0.160141	0.0837844	0.356604	0.319966	0.238853	0.488893	0.332194	0.251608	0.376305
Glucose	0.0921455	0.220995	0.152112	0.285449	0.315494	0.118033	0.0916024	0.0303682	0.100744	-0.0924623	-0.0347582	0.0957004	0.0510059	0.088389	0.130524	0.26209	0.0957209	0.0658958	-0.0510511	0.0542644	0.0806046	0.0826865	0.0507796	-0.103892	-0.0430857	-0.0230364	0.364599	0.036116	0.172433	0.220842	0.222398	0.233984	0.259917	-0.0409586	0.207554	0.199905	0.144419	0.0679776	0.168496	0.290421	0.182797	0.126315	0.251047	0.247516	0.1298	0.327578	0.301736	0.142974	0.386957
Neck	0.335088	0.207947	0.107406	0.307766	0.29339	0.0229637	0.139192	0.16161	0.312943	0.250645	0.0712557	0.175801	0.389883	0.141147	0.308714	0.272972	0.308668	0.189803	0.359916	0.231501	0.178071	0.351504	0.311624	0.156543	0.238868	0.386654	0.299528	0.38238	0.13228	0.427271	0.256011	0.212812	0.260467	0.074075	0.160609	0.16834	0.222452	0.0338317	0.127778	0.0976753	0.176434	0.118183	0.269744	0.345729	0.298892	0.224044	0.101268	0.222253	0.0680271
WHR	0.195098	0.226859	0.0523312	0.176367	0.191428	0.0832768	0.100675	-0.0316705	-0.0111005	0.0881701	-0.122151	0.165742	0.299851	0.138145	0.139233	0.144352	0.0830955	-0.057451	0.221467	0.20203	0.144035	0.164016	0.0064791	0.271584	0.189887	0.181143	0.21227	0.125187	0.179648	0.335131	0.196366	0.286304	0.200127	-0.0359748	0.278329	0.153686	0.230302	0.141226	0.0461239	0.0218386	0.111821	0.0975036	0.0798333	0.336324	0.329618	0.421685	0.28064	0.327315	0.336324
Ile	0.511304	0.205217	0.332174	0.27913	0.504348	0.0182609	0.276522	0.286087	0.329565	0.328696	0.173043	0.236138	0.531304	0.22	0.333913	0.318261	0.182609	0.0704348	0.23913	0.229565	0.181739	0.325217	0.306957	0.294783	0.26087	0.14087	0.0921739	0.409565	0.429565	0.448696	0.285217	0.24	0.251304	0.264348	0.217391	0.0904348	0.196522	0.134783	0.245217	0.38087	0.026087	0.211304	0.511304	0.623478	0.466957	0.549565	0.506087	0.397391	0.45913
Leu	0.373913	0.0626087	0.0747826	0.146957	0.408696	-0.0130435	0.212174	0.276522	0.257391	0.233043	0.0495652	0.0782779	0.441739	0.104348	0.206957	0.145217	0.0686957	-0.105217	0.195652	0.15913	0.0486957	0.233913	0.151304	0.209565	0.233043	0.134783	0.0243478	0.335652	0.344348	0.269565	0.141739	0.0773913	0.104348	0.122609	0.128696	0.02	0.0765217	0.0556522	0.14	0.272174	-0.0582609	0.185217	0.346087	0.484348	0.353913	0.371304	0.351304	0.338261	0.315652
Trigliceride	0.55541	0.462623	0.437387	0.651157	0.424747	0.723043	0.58282	0.398877	0.542407	0.36236	0.345778	0.237048	0.299656	0.584089	0.272789	0.379033	0.226577	-0.0475263	0.345189	0.107648	0.237224	0.202157	0.370832	0.372109	0.111725	0.493975	0.327519	0.166048	0.111635	0.196883	0.109596	0.333318	0.223405	0.0544129	0.172028	0.0101486	0.0303099	0.192506	0.156488	0.169989	-0.0132294	-0.0427238	0.280808	0.313565	0.287287	0.29064	0.244654	0.240673	0.446177
C-peptide	0.39276	0.265249	0.397738	0.285527	0.273937	0.383439	0.181357	0.241176	0.345882	0.0566516	0.103891	0.289871	0.175385	0.309321	0.0691403	0.104434	0.0168326	0.115023	0.272941	0.182443	0.311765	0.121086	0.149683	0.0614041	-0.0362896	0.298462	0.283529	0.305792	0.255837	0.29512	0.253122	0.157738	0.409955	0.268959	0.289955	0.24	0.184796	0.345158	0.199186	0.189683	0.157466	0.0442534	0.287602	0.305701	0.308054	0.162353	0.200995	0.0428516	0.201629
HOMA	0.343982	0.357557	0.346516	0.334442	0.385882	0.361629	0.108959	0.14733	0.35086	0.0724887	0.0760181	0.261906	0.102172	0.236742	0.177647	0.231131	0.151765	0.172851	0.221991	0.220543	0.347602	0.108507	0.163077	0.0766533	-0.00606335	0.229502	0.360724	0.273303	0.220724	0.337066	0.278281	0.18733	0.412941	0.20724	0.277557	0.291765	0.190498	0.275747	0.207692	0.242805	0.180452	0.0362896	0.299729	0.346606	0.334299	0.257014	0.236561	0.0314939	0.238371
Insulin	0.323046	0.332639	0.325445	0.261737	0.285895	0.350695	0.119191	0.156342	0.355129	0.0972442	0.0943482	0.220535	0.0900041	0.213856	0.161139	0.209738	0.126341	0.139509	0.247749	0.20295	0.34264	0.0958867	0.178017	0.110369	-0.00601837	0.26508	0.23621	0.283995	0.178696	0.25228	0.214489	0.122358	0.356079	0.222137	0.235033	0.243586	0.158604	0.251143	0.126929	0.142948	0.12091	-0.0168333	0.252002	0.318114	0.323589	0.141273	0.15331	-0.0438944	0.143762
CRP	0.246763	0.313717	0.199728	0.254827	0.164826	0.0610231	0.0184246	0.137211	0.392983	0.366772	0.538162	0.0578103	-0.0424174	-0.0528293	0.191625	0.130512	0.339928	0.0969217	0.158081	0.0898597	0.238841	0.157854	0.460933	0.085561	0.264101	0.142055	-0.00434586	0.147895	-0.0135355	0.0194889	-0.0170213	0.093436	-0.0387958	0.157492	-0.160299	-0.0577184	-0.216795	-0.0635582	0.0875509	0.114939	-0.0483024	-0.175736	0.18316	0.0247623	0.0113173	-0.125849	-0.0760073	-0.12309	-0.0852875
Cholesterol	0.0959287	0.0332601	-0.0111924	-0.0231331	0.0232005	0.212656	0.208986	0.0681968	0.2132	0.282756	0.211161	-0.0560541	0.0398306	0.0331695	0.256565	0.0993272	0.0097424	-0.0498902	0.0591794	0.0377915	0.0426853	0.00240162	0.223033	0.0989443	0.257698	0.0995538	0.0739969	-0.115368	0.0942974	-0.184725	-0.122618	-0.0655686	-0.172644	-0.126606	-0.0748579	-0.040329	-0.11999	-0.114643	-0.0288194	-0.0765798	-0.0277772	-0.107574	-0.0244693	-0.120443	-0.166572	-0.0546028	-0.0482589	-0.0722993	-0.0600404
LDLC	-0.0813216	-0.0465519	-0.161056	-0.219468	-0.147158	-0.0100029	-0.0207752	0.0538618	0.0543908	0.162307	0.12369	-0.0842331	-0.125806	-0.181399	0.207272	-0.00639608	0.00658845	-0.0589594	-0.0728095	-0.0336155	-0.0872849	0.0199577	0.176013	0.0310674	0.322593	-0.0750698	-0.0505916	-0.0977687	0.0744927	-0.225936	-0.178417	-0.109262	-0.239781	-0.0410696	-0.118929	-0.0128883	-0.0975282	-0.182072	-0.125613	-0.118881	-0.0675676	-0.10253	-0.0866116	-0.224296	-0.266087	-0.189382	-0.110801	-0.169765	-0.246466
Ser	0.245217	-0.00434783	0.310435	-0.22	-0.209565	0.44087	0.405217	0.173913	0.263478	0.182609	0.0730435	0.368341	0.146957	0.318261	0.118261	-0.149565	-0.0173913	0.0373913	0.0417391	0.147826	-0.225217	0.0730435	-0.10087	0.0686957	0.0278261	0.277391	0.303478	-0.0365217	0.16087	0.188696	0.346957	0.193043	0.24	0.24	0.453043	0.302609	0.238261	0.410435	0.172174	-0.0669565	0.234783	0.06	-0.00869565	-0.00347826	0.153913	0.184348	0.244348	0.191304	0.158261
His	0.0634783	-0.208696	0.0930435	-0.304348	-0.0730435	0.0269565	0.0678261	0.186957	0.0313043	-0.0895652	-0.187826	0.158295	0.22087	0.185217	0.182609	-0.234783	-0.324348	0.128696	-0.0730435	-0.0643478	-0.24087	0.0591304	-0.343478	-0.13913	-0.170435	0.0182609	-0.0243478	0.161739	0.366957	0.150435	0.08	0.0991304	0.154783	0.117391	0.417391	0.292174	0.253043	0.243478	0.171304	0.197391	0.196522	0.262609	0.0417391	-0.000869565	0.0486957	0.227826	0.328696	0.24087	-0.0313043
Cit	0.0747826	-0.046087	-0.156522	-0.168696	-0.28	0.00173913	-0.0895652	-0.0234783	-0.163478	-0.0391304	-0.0913043	0.190476	0.046087	0.12	-0.181739	-0.353913	-0.187826	-0.253913	-0.00869565	-0.0547826	-0.352174	0.0495652	-0.206087	-0.122609	-0.161739	0.107826	0.0765217	-0.14	-0.109565	0.033913	-0.0278261	0.0217391	0.113913	0.0208696	0.10087	0.0530435	0.0582609	-0.0408696	-0.0217391	-0.146087	-0.0469565	0.114783	-0.35913	-0.251304	-0.233043	-0.209565	-0.18087	-0.0652174	-0.186087
Gly	0.188696	0.266957	0.0686957	-0.191304	-0.151304	0.121739	0.173043	0.193913	0.153043	0.226087	0.208696	0.330507	0.0782609	0.134783	0.0356522	-0.04	-0.0269565	-0.0373913	-0.2	-0.121739	-0.195652	0.0113043	-0.211304	-0.073913	0.00521739	0.0495652	0.0556522	-0.0373913	-0.169565	-0.0521739	-0.0704348	-0.00173913	-0.0947826	0.234783	0.0278261	-0.0104348	-0.0486957	-0.154783	-0.208696	-0.1	-0.116522	-0.124348	-0.215652	-0.266087	0.0686957	-0.152174	-0.0878261	-0.0026087	-0.106087
ApoA	-0.389118	-0.341995	-0.329727	-0.287205	-0.183016	-0.399212	-0.116654	-0.283419	-0.275814	-0.0471685	0.00303291	-0.36785	-0.304106	-0.342492	-0.145534	-0.159477	-0.0876828	-0.130868	-0.212032	-0.0866869	-0.18718	-0.198542	-0.168983	-0.21593	-0.00932507	-0.261011	-0.188448	-0.221765	-0.150197	-0.340282	-0.268164	-0.315151	-0.25567	-0.187135	-0.292834	-0.194242	-0.266398	-0.258838	-0.096193	-0.0742837	-0.0164773	-0.0276131	-0.17867	-0.218415	-0.323933	-0.308497	-0.291974	-0.217831	-0.132497
HDLC	-0.504658	-0.427899	-0.396645	-0.45588	-0.352251	-0.510214	-0.233562	-0.409688	-0.368482	-0.135741	-0.093135	-0.373419	-0.357227	-0.491326	-0.236267	-0.274671	-0.153518	-0.105453	-0.273222	-0.101009	-0.222886	-0.289211	-0.254189	-0.292117	-0.0444903	-0.356889	-0.253899	-0.270178	-0.136273	-0.37267	-0.226848	-0.365536	-0.282303	-0.271773	-0.308002	-0.20651	-0.287134	-0.275347	-0.140041	-0.228973	-0.0154581	-0.091396	-0.254527	-0.279212	-0.356212	-0.385438	-0.353797	-0.341101	-0.282835
GFR	-0.207126	-0.212022	-0.122955	-0.326842	-0.107276	-0.209876	-0.198433	-0.296577	-0.1229	-0.136928	-0.0640356	-0.390714	-0.166416	-0.329255	-0.249156	-0.177473	-0.0946781	-0.304389	-0.212957	-0.098144	-0.0470365	-0.361768	-0.0228306	-0.191451	-0.257188	-0.133848	-0.391531	-0.22506	-0.275232	-0.390054	-0.174558	-0.199809	-0.260489	-0.154698	-0.212187	-0.235788	-0.269346	-0.18358	-0.283484	-0.314567	-0.257463	-0.273912	-0.0688768	-0.0113328	-0.0280018	-0.198819	-0.276002	-0.195247	-0.0503923
[truncated: 181 more columns]

## Sheet: Obesity
	LACTB2	QDPR	MB	SDC1	SOST	AK1	EIF4EBP1	KYAT1	CD2AP	SERPINE1	SELE	GUSB	ACY1	ACE2	COMT	CA5A	ADH4	GSTA1	USP8	CEP43	STK11	SELP	IL1RL1	CDH2	SIGLEC7	PLXNB2	IGFBP7	ACP5	CTSD	PRCP	VSTM2L	CTSZ	GDF15	REN	PAG1	CTSH	CCL16	THOP1	SSC4D	MEP1B	IL19	CES1	LDLR	GLO1	MEGF9	CNDP1	SERPINA12	SSC5D	SORT1
Age	0.275358	0.110538	0.394418	0.138512	0.418193	0.20712	0.195325	0.278631	0.181616	0.0456974	-0.0485998	-0.0403866	-0.0942354	-0.0306296	0.0299503	0.0695054	-0.133263	-0.0622473	-0.0323587	0.0487233	0.0918888	0.169574	0.161361	0.231389	0.336679	0.382314	0.320314	0.244049	0.377683	0.279248	0.00203786	0.0493408	0.63717	0.274987	0.100411	0.12363	0.08207	0.106648	-0.148764	0.0542193	0.0466854	0.182481	0.0234662	0.123877	0.0296415	-0.0345818	0.286597	0.298206	0.330503
Orn	0.410901	0.218687	0.318354	0.126585	0.122136	-0.0567297	0.0629588	-0.0451613	0.204449	0.300556	0.232925	0.0380423	0.155061	-0.0269188	0.174638	0.160845	0.192881	0.153281	-0.0335929	0.135929	-0.0371524	0.261846	0.122136	0.45139	0.190656	0.157286	0.277864	0.387764	0.323693	0.12525	0.330367	0.397553	-0.098109	-0.280089	-0.140823	0.152392	0.0362625	0.321023	0.0736374	0.226251	-0.186207	0.107008	0.0714127	0.176418	0.263626	0.23693	-0.134594	-0.0540601	0.166185
Ala	0.13059	0.228031	0.222692	0.20356	0.390879	0.362403	0.31079	0.261846	0.191101	0.287653	0.176863	0.197775	0.214238	0.326808	0.189766	0.258732	0.062069	0.114127	-0.135039	0.0211346	0.208899	0.357063	0.362848	0.381535	0.387319	0.4198	0.348165	0.344605	0.526585	0.330367	0.511012	0.34683	0.181758	0.264071	-0.2703	-0.164405	0.208899	0.155061	-0.0941046	-0.12703	-0.025139	0.526585	0.442047	0.511902	0.645384	0.616908	0.478977	0.42069	0.587542
Cys	0.547497	0.204449	0.42158	0.118576	0.114127	0.0625139	0.150167	0.151057	0.147942	0.0731924	0.0202447	0.116796	0.137709	0.230256	-0.0242492	0.280089	0.103003	0.187542	-0.198665	-0.068743	-0.00244716	0.262736	0.149722	0.226696	0.177753	0.121246	0.315239	0.246274	0.392659	0.130145	0.372636	0.251613	0.240489	-0.0602892	0.0682981	0.389544	0.143048	0.110567	-0.00200222	-0.0442714	-0.248053	0.23871	-0.211123	0.00689655	0.114127	0.191101	0.0540601	0.109232	0.0914349
ApoA	0.0657175	-0.136181	-0.0150946	-0.152001	-0.0452838	-0.0425153	0.0113374	-0.0771868	0.0587964	-0.237493	0.0279481	-0.240986	-0.357524	-0.254103	0.137631	-0.216209	-0.278492	-0.222596	-0.380726	0.0750775	-0.0904357	-0.0090963	-0.0234658	0.0585987	0.259047	0.205194	0.072309	0.178103	0.0442291	0.116736	0.143695	-0.101905	0.144354	0.0682223	-0.203217	-0.27401	-0.205524	-0.0833169	-0.217916	-0.125437	-0.368466	-0.137631	-0.0774504	0.0493705	0.0788346	-0.0206974	0.191616	-0.126623	0.138686
HDLC	-0.108785	-0.271807	-0.211805	-0.235483	-0.10178	-0.203251	-0.120376	-0.233995	0.0229347	-0.29908	-0.110334	-0.33435	-0.408795	-0.398567	0.00632253	-0.26949	-0.329701	-0.263501	-0.46204	-0.0365715	-0.201143	-0.131223	-0.0903749	-0.0368814	0.156761	0.064527	-0.0436998	0.0332862	-0.123909	-0.0521298	-0.0270257	-0.145046	-0.0352078	-0.0626054	-0.220978	-0.238582	-0.31656	-0.102338	-0.244905	-0.0573366	-0.320341	-0.233252	-0.188064	-0.0696718	-0.00371913	-0.0727091	0.0888253	-0.279245	0.0397327
Gly	-0.368632	-0.370412	-0.362848	-0.192436	-0.350834	-0.470078	-0.438487	-0.321023	-0.387764	-0.116796	-0.255617	-0.313014	-0.373081	-0.34772	-0.106563	-0.154616	-0.335261	-0.186207	-0.428699	-0.204894	-0.403337	-0.223137	0.0157953	0.0433815	0.0771969	0.0936596	-0.151057	-0.140378	0.135929	0.039822	0.0464961	0.247608	-0.0144605	-0.215128	-0.37931	-0.105673	-0.152836	-0.284983	-0.2703	-0.204449	0.0745273	-0.276974	-0.242714	-0.291212	-0.0456062	0.0647386	-0.0567297	-0.0193548	0.0598443
Cit	0.106563	-0.16396	0.0642937	-0.108788	-0.204449	-0.181758	-0.166185	0.00956618	0.01802	0.244049	0.192436	-0.0892102	-0.190656	-0.340156	0.19644	-0.0513904	-0.178643	-0.126585	0.0273637	0.0740823	-0.317019	-0.0131257	-0.0171301	0.0144605	-0.0135706	-0.140378	-0.0505006	-0.0682981	-0.062069	-0.0820912	-0.157286	0.147942	-0.0878754	-0.172859	-0.156841	-0.187097	-0.0767519	-0.0104561	-0.305895	0.0972191	-0.265406	-0.0286986	0.0131257	-0.176418	-0.0985539	-0.108343	-0.216018	-0.119021	-0.0714127
His	-0.180423	-0.228921	0.0740823	-0.148832	-0.018465	-0.386429	-0.332147	-0.0282536	-0.149722	0.0286986	-0.0700779	-0.0629588	-0.106563	-0.209789	-0.0785317	-0.196885	-0.332147	-0.140823	-0.164405	-0.280534	-0.0215795	-0.0656285	0.192881	0.000222469	0.244939	0.0309232	-0.142158	-0.114127	0.142603	0.104338	-0.139933	0.208454	-0.143938	-0.0442714	-0.455395	-0.287208	-0.0349277	-0.148832	-0.150612	-0.0122358	0.0522803	0.0901001	0.220912	-0.139488	0.259622	0.433593	-0.0380423	0.45495	0.264071
Ser	-0.167519	-0.102558	-0.155506	0.01802	-0.0540601	-0.268076	-0.0593993	-0.0660734	0.0558398	-0.27475	-0.291212	-0.257842	-0.232036	-0.402892	-0.265406	-0.245384	-0.241379	-0.132814	0.100334	0.120356	-0.00155729	-0.207119	0.0905451	-0.0420467	0.0491657	-0.0286986	-0.210679	-0.199555	-0.175528	-0.149722	-0.338821	-0.280089	-0.190656	-0.437152	-0.134149	-0.155506	0.148832	-0.0518354	0.0803115	-0.0291435	0.352614	-0.0122358	-0.0349277	-0.0843159	0.0540601	-0.195551	-0.222692	-0.025584	-0.123026
CRP	0.0644027	0.0269578	-0.113877	-0.274699	-0.210481	-0.00653897	0.0307208	0.0143117	-0.0563215	-0.0644644	-0.0310293	-0.173406	-0.253169	-0.00875975	0.191913	0.190068	0.0218377	-0.0779125	0.141143	0.144166	-0.032263	0.0126461	-0.00727923	0.0810586	0.0606397	0.0402825	-0.0639092	-0.000740261	-0.170137	-0.00598378	0.181179	0.0822923	0.0790845	0.0819839	0.36865	0.0801949	0.0248604	-0.0735326	-0.00437988	0.0331267	-0.145276	-0.218254	-0.112088	-0.333364	-0.0829709	-0.0203572	-0.0668086	-0.0965424	-0.115789
Glu	0.209789	0.477642	0.34772	0.463849	0.290768	0.302781	0.266296	-0.0371524	0.00111235	0.263626	0.390879	0.366852	0.447831	0.569744	0.107453	0.326363	0.438042	0.369967	0.0936596	0.161735	0.241379	0.266741	0.0816463	0.279199	0.414461	0.330812	0.525695	0.447386	0.377086	0.474527	0.373526	0.357063	0.171079	0.292102	0.0874305	0.45762	0.356174	0.432703	0.508343	0.38198	0.425139	0.157731	0.131034	0.243159	0.239155	0.241379	0.127475	0.232481	0.325028
Phe	0.0505006	0.229366	0.397998	0.385539	0.16663	0.298331	0.243604	0.363737	0.046941	0.23426	0.571079	0.327253	0.373971	0.403782	-0.0260289	0.250278	0.337931	0.171079	0.389544	0.338821	0.226251	0.178198	0.334816	0.16218	0.246274	0.146607	0.354839	0.185317	0.31168	0.329922	0.265851	0.19733	0.111457	0.0197998	0.202225	-0.100334	0.204449	0.0647386	0.248943	-0.161735	-0.0847608	0.459399	0.325473	0.436263	0.406452	0.230701	0.262291	0.38287	0.12614
Leu	0.321913	0.384205	0.657397	0.599555	0.420245	0.414461	0.327697	0.350389	0.27297	0.172859	0.509677	0.400222	0.473192	0.408676	-0.123471	0.139043	0.375306	0.224027	0.362403	0.263181	0.465628	0.296107	0.258732	0.296107	0.266741	0.195551	0.318354	0.297887	0.342825	0.241379	0.292547	0.115017	0.0153504	-0.0536151	0.0318131	0.204894	0.373081	0.302336	0.492325	0.040267	-0.00200222	0.421135	0.376196	0.470523	0.389989	0.273415	0.180423	0.406007	0.0923248
Ile	0.338376	0.431368	0.618242	0.621802	0.401112	0.392659	0.381535	0.253838	0.320578	0.179088	0.447831	0.444716	0.501224	0.479422	-0.083426	0.175973	0.403782	0.276085	0.388654	0.330812	0.406452	0.209789	0.185762	0.23337	0.263626	0.190656	0.322358	0.222692	0.31168	0.130145	0.244939	0.101224	0.0411568	-0.0625139	0.00111235	0.205784	0.37931	0.386874	0.549277	0.12881	0.20267	0.455395	0.357953	0.471858	0.313904	0.186652	0.156396	0.27475	0.123915
Trigliceride	0.318519	0.290536	0.347554	0.302237	0.331891	0.440788	0.314557	0.317467	0.278217	0.379313	0.294994	0.390952	0.184797	0.311647	0.118369	0.0669251	0.0170867	-0.00971963	0.403334	0.194207	0.256363	0.302794	0.335977	0.175387	0.123074	0.168329	0.162076	0.0719995	0.286946	0.102459	0.182878	0.0815954	0.271407	0.236676	-0.00885291	-0.167091	0.247943	0.0279826	0.0159724	-0.0638276	0.143813	0.414291	0.729591	0.381728	0.240452	0.0593083	0.368108	0.446979	0.38117
WHR	0.406058	0.376261	0.462692	0.355471	0.203214	0.273297	0.125235	0.273913	0.236528	0.174219	0.227274	0.444122	0.326722	0.226596	0.156637	0.198717	0.260341	0.215306	0.162929	-0.0409636	-0.0145594	0.048305	0.121719	0.0525001	0.00586076	-0.0301675	0.154169	0.191431	0.202597	0.157994	0.0782257	0.0764984	0.00259107	0.0503409	-0.0562633	0.265893	0.312409	0.305993	0.422838	0.350967	0.139178	0.030661	0.102224	0.0596564	-0.078781	-0.0367069	0.0827293	0.0882199	0.00487369
Neck	0.380401	0.490732	0.32895	0.356812	0.177199	0.320282	0.21218	0.237193	0.176456	0.281462	0.312048	0.473396	0.525342	0.364241	0.339538	0.286981	0.511226	0.411977	0.424236	0.197197	0.111879	0.171874	0.130515	0.159429	0.042597	-0.0155405	0.119185	0.1229	0.0640812	-0.00136211	0.240537	0.0576422	0.0475501	0.224811	0.208527	0.238927	0.286353	0.306475	0.292607	0.239422	0.284867	0.157262	0.170202	0.10222	0.102592	0.0566515	0.00495314	0.0814172	-0.0273661
Waist	0.0443992	0.134371	-0.120847	-0.0977523	-0.181672	0.0424849	0.148512	-0.0318019	-0.0661357	0.198901	0.0592195	0.00957145	0.103742	0.124367	0.312709	0.226573	0.21051	0.0673089	0.183031	0.226874	0.173706	0.195258	0.0679264	0.177288	0.06805	0.0697172	0.0790417	-0.0119798	-0.11319	-0.169816	0.329135	0.0856491	0.0954675	0.0604545	0.292392	0.0327899	-0.0371125	-0.0224775	-0.158454	-0.230332	-0.0886749	0.127702	-0.0209954	-0.0287144	0.197728	0.0304434	-0.0780537	-0.035507	-0.0555144
BMI	0.00777106	0.11083	-0.235167	-0.129456	-0.322869	-0.156963	-0.0939928	-0.101517	-0.204515	0.103244	-0.024485	0.0326261	0.153324	0.0234365	0.152152	0.183921	0.254348	0.117799	0.101085	0.135192	-0.0943629	-0.051252	-0.0956581	0.111694	-0.0841865	-0.118169	-0.10676	-0.0844949	-0.24411	-0.248797	0.271494	0.0981868	-0.129148	-0.0582213	0.189589	0.0783274	-0.113606	-0.01252	-0.058468	-0.0511903	-0.0890588	0.0456396	-0.142223	-0.209449	0.0143703	-0.00888121	-0.108425	-0.208647	-0.216541
Abdomen	0.270556	0.373272	0.182654	0.160926	0.00345679	0.192346	0.209074	0.16642	0.0824692	0.315371	0.173704	0.296975	0.348889	0.289383	0.35642	0.350381	0.360494	0.214568	0.317716	0.163333	0.134877	0.20463	0.109012	0.17037	0.0637655	-0.022284	0.141358	0.0342593	-0.00537037	-0.104444	0.338025	0.156605	0.0728395	0.0870371	0.255679	0.205247	0.159321	0.191111	0.187469	0.116975	0.0925309	0.146914	0.0816667	0.00932099	0.11784	0.0480247	-0.0175926	0.0613581	-0.070926
Insulin	0.172269	0.391661	0.136002	0.17486	-0.0864121	0.122864	0.118547	0.269475	0.130081	0.287547	0.180226	0.297354	0.45223	0.29168	0.389872	0.282868	0.555665	0.467896	0.348362	0.19509	0.07568	0.0104237	-0.170049	0.144452	-0.00499599	-0.055326	0.108925	0.00400913	-0.0671066	0.0378092	0.321779	0.0603836	0.0589033	0.190711	0.189108	0.110714	0.171714	0.0647628	0.21051	0.146796	0.0447789	0.169124	0.10837	-0.0423734	0.165608	0.176772	0.0799359	0.110159	-0.12638
HOMA	0.226711	0.414814	0.143945	0.186006	-0.0969503	0.148756	0.170711	0.292023	0.17176	0.289802	0.170465	0.332665	0.464584	0.288199	0.372691	0.255952	0.546363	0.456197	0.399087	0.267292	0.121064	-0.0147399	-0.171513	0.141725	-0.00912763	-0.0369422	0.0843073	0.0207839	-0.0439113	0.0824571	0.308243	0.0410127	0.0709858	0.221962	0.184403	0.0920164	0.115576	0.0650035	0.155478	0.085479	0.03133	0.229424	0.158562	0.0210306	0.176324	0.171451	0.0703074	0.12939	-0.0814086
C-peptide	0.23984	0.32766	0.0940487	0.108356	-0.0862781	0.172741	0.162874	0.186186	0.0326241	0.387727	0.200247	0.203454	0.295714	0.23873	0.330496	0.207037	0.413753	0.286093	0.367499	0.155843	0.130311	0.0553191	-0.0727105	0.239963	-0.0662966	0.0233734	0.0545791	-0.0556892	0.0102991	0.0353377	0.196546	0.0119026	0.0691335	0.222695	0.103916	0.0512488	0.208511	0.0252236	0.0878816	-0.0688868	-0.121431	0.139809	0.119334	0.00733888	0.0942954	0.0796176	0.0601295	-0.126488	-0.0819611
GFR	-0.00148402	0.00923388	-0.190036	-0.0699961	-0.2414	-0.0251458	-0.042212	-0.0702434	-0.105448	0.0755199	-0.00206113	0.0229198	0.154585	0.200095	0.128944	0.0298461	-0.00544139	-0.0728817	-0.0486427	0.0519406	0.0300101	-0.179236	-0.1362	0.0122844	-0.107014	-0.177752	-0.177587	0.00676052	-0.125812	-0.0217656	-0.0688419	-0.179813	-0.232578	0.0939052	-0.173383	-0.168353	-0.163654	-0.0416349	-0.208092	-0.070161	-0.0130264	0.153431	0.085908	-0.117979	0.0611744	-0.0380073	-0.1625	-0.149144	-0.0291032
Cholesterol	0.113488	0.0397642	-0.087617	-0.0407521	0.0872465	0.14115	0.142756	0.157513	0.258344	0.00691551	-0.114229	-0.111945	-0.0807632	-0.158254	0.0937298	-0.0550479	-0.160477	-0.0941003	-0.181162	-0.110339	-0.142571	0.038838	0.0330339	-0.0442716	0.103856	-0.0195734	-0.136952	0.0169183	-0.118119	-0.0785404	0.0429749	-0.188818	-0.0737242	0.024513	-0.171838	-0.413016	-0.0256862	0.00759471	-0.166404	0.0282795	-0.118428	0.0641537	0.284585	0.216912	0.170171	0.111204	0.237288	0.113859	0.344355
LDLC	0.106636	0.059187	-0.0777834	-0.0250217	0.0551094	0.15186	0.161683	0.172124	0.283332	0.0134067	-0.103238	-0.0821699	-0.0250834	-0.106883	0.0718523	0.0263817	-0.111146	-0.0337329	-0.179106	-0.131781	-0.146608	0.0407143	-0.0170518	-0.0596195	0.0767331	-0.0691339	-0.143828	0.0129742	-0.101199	-0.0527617	0.0336093	-0.138947	-0.152169	-0.0317559	-0.175337	-0.353578	0.0154455	0.00741383	-0.0855061	0.0508465	-0.0459657	0.0693811	0.255097	0.200853	0.183616	0.172804	0.168665	0.157791	0.31725
Tyr	0.151502	0.315239	0.188877	0.172859	0.186652	0.264516	0.179088	0.340601	0.135484	0.355729	0.16218	0.155061	0.111012	0.206674	0.183982	0.389989	0.304116	0.151057	0.42069	0.0558398	0.343715	0.219132	0.172859	0.192881	0.292992	-0.0433815	0.279644	0.244494	0.301001	0.459844	-0.0433815	0.0140156	0.0780868	-0.105228	0.16129	-0.106118	0.481201	0.261402	0.257397	0.0994438	-0.0242492	0.437152	0.297887	0.178198	0.19733	0.00422692	0.0309232	0.364627	0.0242492
Glucose	0.358197	0.160737	0.245928	0.00241106	0.0315911	0.136194	0.241601	0.254027	0.308492	0.159748	-0.0390716	0.206486	0.0655314	-0.0343731	0.214894	-0.0404329	-0.0114989	0.00741865	0.245001	0.215697	0.168651	-0.0654078	-0.0341876	0.0158883	-0.0710336	0.0831507	-0.0184848	0.0357332	0.0796268	0.172978	-0.0886529	-0.106025	0.188372	0.15165	0.0136627	0.0647277	-0.160243	-0.0267071	-0.22225	-0.0904457	-0.0612657	0.181881	0.181695	0.126983	-0.0148991	-0.0680043	-0.0378969	0.16117	0.170629
HbA1C	-0.0038561	-0.0595208	0.109774	-0.0555403	-0.0722086	0.106913	0.035389	0.189757	-0.00167927	0.0502537	0.0458378	-0.0514976	-0.236093	-0.158971	0.11021	-0.202203	-0.113506	-0.287031	0.200206	-0.00740122	0.183476	0.102746	0.0968378	-0.120223	0.0606403	-0.0751939	-0.202321	-0.139068	-0.160401	0.0699695	-0.121405	-0.240135	0.0798586	-0.0834659	-0.0542342	-0.257612	-0.107038	-0.27341	-0.0734525	-0.175639	-0.240446	-0.0315951	0.178811	0.0593342	-0.0902452	-0.123893	-0.143422	0.204249	0.014989
Eth	-0.102113	0.0211346	-0.223137	-0.0998888	0.149722	0.23515	0.0286986	0.00200222	0.0353726	0.135484	0.0571746	-0.12525	-0.219132	-0.190656	-0.0989989	-0.254727	-0.0771969	-0.256062	0.27475	0.0972191	0.191101	0.16307	0.192881	0.0602892	-0.0745273	-0.179978	-0.23604	-0.12703	-0.12614	-0.039822	-0.142603	-0.107008	-0.139933	-0.138598	0.00645161	-0.363293	0.0874305	0.00556174	-0.00422692	-0.061624	-0.27386	0.192436	0.228476	0.19911	-0.0393771	-0.158176	-0.100334	0.00645161	0.00244716
Tau	-0.185317	-0.31168	-0.206674	-0.171969	-0.311235	0.0433815	0.0131257	-0.454505	-0.275195	0.018465	0.199555	-0.182647	-0.425139	-0.0941046	-0.262291	-0.27386	-0.353949	-0.446941	-0.025584	0.173749	-0.0500556	0.183537	0.0789766	-0.148832	-0.0197998	-0.0860957	-0.068743	-0.147052	-0.126585	0.0051168	-0.0166852	0.324138	-0.0776418	-0.0153504	0.134594	0.167519	-0.277419	-0.23604	-0.304561	-0.318799	-0.0856507	-0.0776418	-0.20178	-0.140823	-0.153726	0.0580645	-0.344605	-0.16485	0.107008
Asp	-0.193771	-0.0269188	-0.231146	-0.0162403	-0.151947	-0.018465	-0.0140156	-0.407341	-0.256952	-0.0518354	0.139043	0.0313682	-0.137264	-0.0211346	-0.0451613	-0.19822	-0.0736374	-0.16129	0.132814	0.285428	0.039822	-0.102113	-0.0669633	0.0264739	0.170189	0.0754171	-0.0527253	-0.061624	-0.00912125	0.233815	0.0491657	0.123915	-0.262736	-0.117686	-0.0678532	0.0629588	-0.107453	-0.0153504	0.157731	-0.113237	0.216018	-0.143048	0.054505	-0.068743	-0.0171301	-0.0927697	-0.360178	-0.0883204	0.0918799
ACR	-0.123783	-0.315357	-0.113353	-0.296968	-0.241253	-0.232744	-0.21216	-0.146014	-0.00247016	0.0477565	-0.227529	-0.00631264	-0.136133	-0.204475	-0.258544	-0.0301909	-0.133114	-0.00933173	0.0532457	-0.100453	-0.409498	-0.29642	-0.131193	-0.11747	-0.260739	-0.139427	-0.210513	-0.228353	-0.0118019	-0.100179	-0.248663	0.0524223	-0.330178	-0.240978	-0.164952	-0.0968853	-0.232195	-0.221491	-0.196515	-0.0702624	-0.109785	0.0798686	0.203377	0.00686156	0.108962	0.0249761	-0.0826132	-0.00850834	0.141623
[truncated: 181 more columns]
