# Supplementary material for: Examination of the Complex Molecular Landscape in Obesity and Type 2 Diabetes
Source: Int J Mol Sci. 2024 Apr 27;25(9):4781. doi: 10.3390/ijms25094781 (PMC11084226; doi:10.3390/ijms25094781)
Supplement: Supplementary file 1 [file ijms-25-04781-s001.zip › TableS3.xlsx]

## Sheet: Clinical characteristics
Sample ID	Group	Age	Sex	Diabetes length	BMI
444	Control	61	Female	0	22.8928
361	Control	52	Female	0	NA
415	Control	49	Female	0	24.4352
485	Control	36	Male	0	NA
355	Control	31	Male	0	20.9961
310	Control	47	Male	0	25.0135
475	Control	47	Female	0	20.83
344	Control	53	Female	0	23.7118
451	Control	48	Male	0	NA
471	Control	55	Male	0	NA
461	Control	51	Male	0	23.6713
392	Control	58	Male	0	27.7743
418	Control	54	Male	0	26.8633
406	Control	36	Female	0	NA
434	Control	61	Female	0	27.0993
133	Control	30	Male	0	27.4693
249	Control	50	Male	0	NA
323	Control	41	Male	0	25.1278
370	Control	58	Female	0	27.102
391	Control	30	Female	0	26.7698
280	Control	34	Male	0	NA
365	Control	49	Male	0	NA
467	Control	64	Male	0	24.811
447	Control	62	Female	0	24.0238
318	Control	43	Male	0	25.38
173	Control	61	Female	0	NA
439	Control	57	Male	0	25.8546
423	Control	60	Male	0	26.1224
313	Control	51	Female	0	26.5832
466	Control	52	Male	0	NA
395	Control	57	Male	0	25.76
325	Control	38	Female	0	29.0006
AK7	Diabetes	52	Male	3	29.7619
AK4	Diabetes	50	Male	21	37.7163
AK2	Diabetes	47	Male	6	38.0623
AK8	Diabetes	55	Male	8	32.41
AK5	Diabetes	51	Male	22	35.1562
AK3	Diabetes	48	Male	7	35.9862
AK11	Diabetes	49	Male	15	35.3415
AK13	Diabetes	53	Male	8	24.7252
AK16	Diabetes	40	Female	9	47.2681
AK15	Diabetes	54	Male	14	32.2831
AK14	Diabetes	45	Male	2	37.037
AK41	Diabetes	55	Male	22	40.4671
AK9	Diabetes	57	Male	25	31.9508
AK10	Diabetes	59	Male	18	26.5625
AK38	Diabetes	45	Female	10	24.6094
AK40	Diabetes	44	Female	8	28.2284
AK18	Diabetes	48	Female	15	33.6485
AK22	Diabetes	49	Female	8	33.6901
AK20	Diabetes	63	Female	19	35.1562
AK66	Diabetes	48	Male	4	28.0863
AK37	Diabetes	43	Male	2	29.5369
AK64	Diabetes	51	Male	14	29.5858
AK71	Diabetes	43	Male	8	30.7934
AK93	Diabetes	44	Male	12	35.0112
AK87	Diabetes	60	Female	1	47.0156
AK17	Diabetes	44	Female	3	41.5225
AK86	Diabetes	61	Male	2	26.8519
AK69	Diabetes	33	Male	0	37.551
AK70	Diabetes	33	Male	2	29.3524
AK65	Diabetes	50	Female	11	32.8473
AK75	Diabetes	54	Female	17	27.0552
AK100	Diabetes	58	Male	18	28.3266
AK72	Diabetes	58	Female	0	31.9122
AK98	Diabetes	55	Female	11	31.6158
AK103	Diabetes	56	Male	20	31.4564
AK107	Diabetes	56	Female	26	32.7694
AK104	Diabetes	60	Male	11	28.4091
AK105	Diabetes	59	Female	7	35.2508
AK76	Diabetes	56	Male	1	31.1346
AK97	Diabetes	56	Female	5	37.3419
AK54	Diabetes	40	Male	3	35.7459
AK102	Diabetes	61	Male	11	28.0277
AK89	Diabetes	73	Male	25	28.3737
AK88	Diabetes	50	Male	0	43.9427
AK82	Diabetes	47	Male	5	29.3658
AK114	Diabetes	40	Female	6	28.1625
AK117	Diabetes	40	Female	7	39.5558
AK85	Diabetes	47	Female	0	39.2565
AK119	Diabetes	52	Female	0	31.1951
AK124	Diabetes	56	Female	0	53.4072
AK83	Diabetes	52	Female	0	33.2031
AK96	Diabetes	52	Male	10	37.6493
AK113	Diabetes	54	Female	10	31.9122
AK121	Diabetes	33	Male	0	40.7559
AK35	Obese	61	Female	0	35.6401
AK23	Obese	44	Male	0	38.1328
AK28	Obese	56	Female	0	33.4622
AK33	Obese	48	Female	0	45.3599
AK31	Obese	67	Female	0	35.693
AK30	Obese	48	Female	0	37.0983
AK36	Obese	64	Female	0	32.1429
AK44	Obese	65	Male	0	33.2515
AK46	Obese	64	Female	0	36.1323
AK49	Obese	34	Female	3	41.8733
AK47	Obese	67	Female	0	31.9922
AK43	Obese	50	Male	0	36.6841
AK48	Obese	35	Male	0	45.2694
AK34	Obese	44	Female	7	33.6593
AK59	Obese	60	Female	0	36.4848
AK42	Obese	33	Female	0	33.305
AK45	Obese	48	Male	0	35.6647
AK80	Obese	56	Female	0	35.4308
AK81	Obese	60	Male	0	32.1402
AK63	Obese	51	Female	0	38.5675
AK50	Obese	52	Female	0	40.404
AK60	Obese	60	Male	0	35.4922
AK61	Obese	59	Female	0	33.2986
AK68	Obese	52	Male	0	36.7813
AK90	Obese	51	Female	0	31.2213
AK73	Obese	41	Female	0	36.4938
AK78	Obese	61	Male	0	40.3538
AK79	Obese	32	Male	0	31.0204
AK77	Obese	56	Male	0	36.3324
AK57	Obese	44	Female	0	40.3538
AK110	Obese	60	Male	0	44.412
AK52	Obese	63	Male	0	50.1186
AK108	Obese	60	Male	0	33.8401
AK62	Obese	55	Male	0	39.1527
AK112	Obese	46	Male	0	32.1402
AK116	Obese	49	Male	0	42.449
AK51	Obese	45	Female	0	50.519
AK118	Obese	45	Female	0	47.4048
AK32	Obese	47	Female	0	44.6163
AK123	Obese	40	Male	0	54.4986
AK122	Obese	49	Female	0	34.1986
AK120	Obese	65	Female	0	32.0312
AK125	Obese	46	Male	0	30.0712
AK58	Obese	NA	Male	NA	NA
