# Supplementary material for: Examination of the Complex Molecular Landscape in Obesity and Type 2 Diabetes
Source: Int J Mol Sci. 2024 Apr 27;25(9):4781. doi: 10.3390/ijms25094781 (PMC11084226; doi:10.3390/ijms25094781)
Supplement: Supplementary file 1 [file ijms-25-04781-s001.zip › TableS4.xlsx]

## Sheet: Cardiometabolic panel
UniProt ID	Gene	Protein name
A1L4H1	SSC5D	Soluble scavenger receptor cysteine-rich domain-containing protein SSC5D
A6NI73	LILRA5	Leukocyte immunoglobulin-like receptor subfamily A member 5
O00161	SNAP23	Synaptosomal-associated protein 23
O00533	CHL1	Neural cell adhesion molecule L1-like protein
O00584	RNASET2	Ribonuclease T2
O14786	NRP1	Neuropilin-1
O14793	MSTN	Growth/differentiation factor 8
O14798	TNFRSF10C	Tumor necrosis factor receptor superfamily member 10C
O14917	PCDH17	Protocadherin-17
O15031	PLXNB2	Plexin-B2
O15354	GPR37	Prosaposin receptor GPR37
O15467	CCL16	C-C motif chemokine 16
O43186	CRX	Cone-rod homeobox protein
O43854	EDIL3	EGF-like repeat and discoidin I-like domain-containing protein 3
O60496	DOK2	Docking protein 2
O60635	TSPAN1	Tetraspanin-1
O60664	PLIN3	Perilipin-3
O75015	FCGR3B	Low affinity immunoglobulin gamma Fc region receptor III-B
O75023	LILRB5	Leukocyte immunoglobulin-like receptor subfamily B member 5
O75326	SEMA7A	Semaphorin-7A
O75340	PDCD6	Programmed cell death protein 6
O75354	ENTPD6	Ectonucleoside triphosphate diphosphohydrolase 6
O75356	ENTPD5	Nucleoside diphosphate phosphatase ENTPD5
O75594	PGLYRP1	Peptidoglycan recognition protein 1
O75791	GRAP2	GRB2-related adapter protein 2
O94903	PLPBP	Pyridoxal phosphate homeostasis protein
O95183	VAMP5	Vesicle-associated membrane protein 5
O95445	APOM	Apolipoprotein M
O95502	NPTXR	Neuronal pentraxin receptor
O95544	NADK	NAD kinase
O95684	CEP43	Centrosomal protein 43
O95841	ANGPTL1	Angiopoietin-related protein 1
O95988	TCL1B	T-cell leukemia/lymphoma protein 1B
O95998	IL18BP	Interleukin-18-binding protein
O96017	CHEK2	Serine/threonine-protein kinase Chk2
P00441	SOD1	Superoxide dismutase [Cu-Zn]
P00533	EGFR	Epidermal growth factor receptor
P00568	AK1	Adenylate kinase isoenzyme 1
P00740	F9	Coagulation factor IX
P00750	PLAT	Tissue-type plasminogen activator
P00797	REN	Renin
P00915	CA1	Carbonic anhydrase 1
P01033	TIMP1	Metalloproteinase inhibitor 1
P01034	CST3	Cystatin-C
P01130	LDLR	Low-density lipoprotein receptor
P01222	TSHB	Thyrotropin subunit beta
P01241	GH1	Somatotropin
P01375	TNF	Tumor necrosis factor
P01589	IL2RA	Interleukin-2 receptor subunit alpha
P02144	MB	Myoglobin
P02452	COL1A1	Collagen alpha-1(I) chain
P02462	COL4A1	Collagen alpha-1(IV) chain
P02786	TFRC	Transferrin receptor protein 1
P03950	ANG	Angiogenin
P04054	PLA2G1B	Phospholipase A2
P04066	FUCA1	Tissue alpha-L-fucosidase
P04070	PROC	Vitamin K-dependent protein C
P04080	CSTB	Cystatin-B
P04085	PDGFA	Platelet-derived growth factor subunit A
P04275	VWF	von Willebrand factor
P04746	AMY2A	Pancreatic alpha-amylase
P04792	HSPB1	Heat shock protein beta-1
P05107	ITGB2	Integrin beta-2
P05121	SERPINE1	Plasminogen activator inhibitor 1
P05231	IL6	Interleukin-6
P05362	ICAM1	Intercellular adhesion molecule 1
P05451	REG1A	Lithostathine-1-alpha
P05556	ITGB1	Integrin beta-1
P06681	C2	Complement C2
P06858	LPL	Lipoprotein lipase
P07204	THBD	Thrombomodulin
P07339	CTSD	Cathepsin D
P07359	GP1BA	Platelet glycoprotein Ib alpha chain
P07451	CA3	Carbonic anhydrase 3
P07478	PRSS2	Trypsin-2
P07585	DCN	Decorin
P07711	CTSL	Procathepsin L
P07858	CTSB	Cathepsin B
P07911	UMOD	Uromodulin
P08118	MSMB	Beta-microseminoprotein
P08174	CD55	Complement decay-accelerating factor
P08236	GUSB	Beta-glucuronidase
P08263	GSTA1	Glutathione S-transferase A1
P08319	ADH4	All-trans-retinol dehydrogenase [NAD(+)] ADH4
P08571	CD14	Monocyte differentiation antigen CD14
P08581	MET	Hepatocyte growth factor receptor
P08670	VIM	Vimentin
P08709	F7	Coagulation factor VII
P08833	IGFBP1	Insulin-like growth factor-binding protein 1
P08887	IL6R	Interleukin-6 receptor subunit alpha
P09093	CELA3A	Chymotrypsin-like elastase family member 3A
P09237	MMP7	Matrilysin
P09382	LGALS1	Galectin-1
P09417	QDPR	Dihydropteridine reductase
P09467	FBP1	Fructose-1	6-bisphosphatase 1
P09496	CLTA	Clathrin light chain A
P09525	ANXA4	Annexin A4
P09601	HMOX1	Heme oxygenase 1
P09619	PDGFRB	Platelet-derived growth factor receptor beta
P09668	CTSH	Pro-cathepsin H
P10145	CXCL8	Interleukin-8
P10451	SPP1	Osteopontin
P10586	PTPRF	Receptor-type tyrosine-protein phosphatase F
P10644	PRKAR1A	cAMP-dependent protein kinase type I-alpha regulatory subunit
P10646	TFPI	Tissue factor pathway inhibitor
P10721	KIT	Mast/stem cell growth factor receptor Kit
P12104	FABP2	Fatty acid-binding protein	intestinal
P12111	COL6A3	Collagen alpha-3(VI) chain
P12318	FCGR2A	Low affinity immunoglobulin gamma Fc region receptor II-a
P12724	RNASE3	Eosinophil cationic protein
P12830	CDH1	Cadherin-1
P13501	CCL5	C-C motif chemokine 5
P13591	NCAM1	Neural cell adhesion molecule 1
P13598	ICAM2	Intercellular adhesion molecule 2
P13686	ACP5	Tartrate-resistant acid phosphatase type 5
P13807	GYS1	Glycogen [starch] synthase	muscle
P13987	CD59	CD59 glycoprotein
P14543	NID1	Nidogen-1
P14555	PLA2G2A	Phospholipase A2	membrane associated
P15085	CPA1	Carboxypeptidase A1
P15086	CPB1	Carboxypeptidase B
P15090	FABP4	Fatty acid-binding protein	adipocyte
P15144	ANPEP	Aminopeptidase N
P15529	CD46	Membrane cofactor protein
P15907	ST6GAL1	Beta-galactoside alpha-2	6-sialyltransferase 1
P16109	SELP	P-selectin
P16112	ACAN	Aggrecan core protein
P16234	PDGFRA	Platelet-derived growth factor receptor alpha
P16581	SELE	E-selectin
P16860	NPPB	Natriuretic peptides B
P17516	AKR1C4	Aldo-keto reductase family 1 member C4
P17676	CEBPB	CCAAT/enhancer-binding protein beta
P17813	ENG	Endoglin
P17931	LGALS3	Galectin-3
P17936	IGFBP3	Insulin-like growth factor-binding protein 3
P18065	IGFBP2	Insulin-like growth factor-binding protein 2
P18428	LBP	Lipopolysaccharide-binding protein
P18827	SDC1	Syndecan-1
P19021	PAM	Peptidyl-glycine alpha-amidating monooxygenase
P19022	CDH2	Cadherin-2
P19320	VCAM1	Vascular cell adhesion protein 1
P19429	TNNI3	Troponin I	cardiac muscle
P19957	PI3	Elafin
P19961	AMY2B	Alpha-amylase 2B
P19971	TYMP	Thymidine phosphorylase
P20023	CR2	Complement receptor type 2
P20062	TCN2	Transcobalamin-2
P20160	AZU1	Azurocidin
P20711	DDC	Aromatic-L-amino-acid decarboxylase
P20718	GZMH	Granzyme H
P21246	PTN	Pleiotrophin
P21549	AGXT	Alanine--glyoxylate aminotransferase
P21583	KITLG	Kit ligand
P21964	COMT	Catechol O-methyltransferase
P21980	TGM2	Protein-glutamine gamma-glutamyltransferase 2
P22004	BMP6	Bone morphogenetic protein 6
P22748	CA4	Carbonic anhydrase 4
P23141	CES1	Liver carboxylesterase 1
P23284	PPIB	Peptidyl-prolyl cis-trans isomerase B
P23526	AHCY	Adenosylhomocysteinase
P24158	PRTN3	Myeloblastin
P24592	IGFBP6	Insulin-like growth factor-binding protein 6
P24821	TNC	Tenascin
P25445	FAS	Tumor necrosis factor receptor superfamily member 6
P25815	S100P	Protein S100-P
P27352	CBLIF	Cobalamin binding intrinsic factor
P27487	DPP4	Dipeptidyl peptidase 4
P30530	AXL	Tyrosine-protein kinase receptor UFO
P31146	CORO1A	Coronin-1A
P31431	SDC4	Syndecan-4
P31483	TIA1	Cytotoxic granule associated RNA binding protein TIA1
P31949	S100A11	Protein S100-A11
P31997	CEACAM8	Carcinoembryonic antigen-related cell adhesion molecule 8
P32942	ICAM3	Intercellular adhesion molecule 3
P33151	CDH5	Cadherin-5
P34913	EPHX2	Bifunctional epoxide hydrolase 2
P34947	GRK5	G protein-coupled receptor kinase 5
P34998	CRHR1	Corticotropin-releasing factor receptor 1
P35218	CA5A	Carbonic anhydrase 5A	mitochondrial
P35247	SFTPD	Pulmonary surfactant-associated protein D
P35443	THBS4	Thrombospondin-4
P35590	TIE1	Tyrosine-protein kinase receptor Tie-1
P35754	GLRX	Glutaredoxin-1
P36222	CHI3L1	Chitinase-3-like protein 1
P36952	SERPINB5	Serpin B5
P39060	COL18A1	Collagen alpha-1(XVIII) chain
P40189	IL6ST	Interleukin-6 receptor subunit beta
P40225	THPO	Thrombopoietin
P40818	USP8	Ubiquitin carboxyl-terminal hydrolase 8
P41159	LEP	Leptin
P41218	MNDA	Myeloid cell nuclear differentiation antigen
P41222	PTGDS	Prostaglandin-H2 D-isomerase
P41236	PPP1R2	Protein phosphatase inhibitor 2
P42574	CASP3	Caspase-3
P42785	PRCP	Lysosomal Pro-X carboxypeptidase
P42830	CXCL5	C-X-C motif chemokine 5
P43121	MCAM	Cell surface glycoprotein MUC18
P46379	BAG6	Large proline-rich protein BAG6
P46531	NOTCH1	Neurogenic locus notch homolog protein 1
P48304	REG1B	Lithostathine-1-beta
P48357	LEPR	Leptin receptor
P48745	CCN3	CCN family member 3
P48960	ADGRE5	Adhesion G protein-coupled receptor E5
P49747	COMP	Cartilage oligomeric matrix protein
P51161	FABP6	Gastrotropin
P51693	APLP1	Amyloid beta precursor like protein 1
P52789	HK2	Hexokinase-2
P52888	THOP1	Thimet oligopeptidase
P54760	EPHB4	Ephrin type-B receptor 4
P55058	PLTP	Phospholipid transfer protein
P55082	MFAP3	Microfibril-associated glycoprotein 3
P55259	GP2	Pancreatic secretory granule membrane major glycoprotein GP2
P55285	CDH6	Cadherin-6
P55774	CCL18	C-C motif chemokine 18
P55808	XG	Glycoprotein Xg
P58546	MTPN	Myotrophin
P59665	DEFA1	DEFA1B	Neutrophil defensin 1
P61978	HNRNPK	Heterogeneous nuclear ribonucleoprotein K
P62736	ACTA2	Actin	aortic smooth muscle
P78324	SIRPA	Tyrosine-protein phosphatase non-receptor type substrate 1
P78380	OLR1	Oxidized low-density lipoprotein receptor 1
P80188	LCN2	Neutrophil gelatinase-associated lipocalin
P80370	DLK1	Protein delta homolog 1
P98160	HSPG2	Basement membrane-specific heparan sulfate proteoglycan core protein
Q01638	IL1RL1	Interleukin-1 receptor-like 1
Q01973	ROR1	Inactive tyrosine-protein kinase transmembrane receptor ROR1
Q03154	ACY1	Aminoacylase-1
Q03167	TGFBR3	Transforming growth factor beta receptor type 3
Q04760	GLO1	Lactoylglutathione lyase
Q05315	CLC	Galectin-10
Q06033	ITIH3	Inter-alpha-trypsin inhibitor heavy chain H3
Q06141	REG3A	Regenerating islet-derived protein 3-alpha
Q06418	TYRO3	Tyrosine-protein kinase receptor TYRO3
Q07108	CD69	Early activation antigen CD69
Q07507	DPT	Dermatopontin
Q07654	TFF3	Trefoil factor 3
Q12794	HYAL1	Hyaluronidase-1
Q12805	EFEMP1	EGF-containing fibulin-like extracellular matrix protein 1
Q12860	CNTN1	Contactin-1
Q12864	CDH17	Cadherin-17
Q12884	FAP	Prolyl endopeptidase FAP
Q12912	IRAG2	Inositol 1	4	5-triphosphate receptor associated 2
Q13043	STK4	Serine/threonine-protein kinase 4
Q13105	ZBTB17	Zinc finger and BTB domain-containing protein 17
Q13158	FADD	FAS-associated death domain protein
Q13231	CHIT1	Chitotriosidase-1
Q13275	SEMA3F	Semaphorin-3F
Q13332	PTPRS	Receptor-type tyrosine-protein phosphatase S
Q13361	MFAP5	Microfibrillar-associated protein 5
Q13444	ADAM15	Disintegrin and metalloproteinase domain-containing protein 15
Q13508	ART3	Ecto-ADP-ribosyltransferase 3
Q13541	EIF4EBP1	Eukaryotic translation initiation factor 4E-binding protein 1
Q13740	ALCAM	CD166 antigen
Q13822	ENPP2	Ectonucleotide pyrophosphatase/phosphodiesterase family member 2
Q13867	BLMH	Bleomycin hydrolase
Q14162	SCARF1	Scavenger receptor class F member 1
Q14393	GAS6	Growth arrest-specific protein 6
Q14515	SPARCL1	SPARC-like protein 1
Q14767	LTBP2	Latent-transforming growth factor beta-binding protein 2
Q14956	GPNMB	Transmembrane glycoprotein NMB
Q15067	ACOX1	Peroxisomal acyl-coenzyme A oxidase 1
Q15113	PCOLCE	Procollagen C-endopeptidase enhancer 1
Q15165	PON2	Serum paraoxonase/arylesterase 2
Q15485	FCN2	Ficolin-2
Q15582	TGFBI	Transforming growth factor-beta-induced protein ig-h3
Q15828	CST6	Cystatin-M
Q15831	STK11	Serine/threonine-protein kinase STK11
Q15846	CLUL1	Clusterin-like protein 1
Q16270	IGFBP7	Insulin-like growth factor-binding protein 7
Q16619	CTF1	Cardiotrophin-1
Q16620	NTRK2	BDNF/NT-3 growth factors receptor
Q16627	CCL14	C-C motif chemokine 14
Q16663	CCL15	C-C motif chemokine 15
Q16769	QPCT	Glutaminyl-peptide cyclotransferase
Q16773	KYAT1	Kynurenine--oxoglutarate transaminase 1
Q16820	MEP1B	Meprin A subunit beta
Q16853	AOC3	Membrane primary amine oxidase
Q53H82	LACTB2	Endoribonuclease LACTB2
Q5VY43	PEAR1	Platelet endothelial aggregation receptor 1
Q6EMK4	VASN	Vasorin
Q6GTS8	PM20D1	N-fatty-acyl-amino acid synthase/hydrolase PM20D1
Q6PJW8	CNST	Consortin
Q6UWL2	SUSD1	Sushi domain-containing protein 1
Q6WN34	CHRDL2	Chordin-like protein 2
Q76LX8	ADAMTS13	A disintegrin and metalloproteinase with thrombospondin motifs 13
Q76M96	CCDC80	Coiled-coil domain-containing protein 80
Q86U17	SERPINA11	Serpin A11
Q86VB7	CD163	Scavenger receptor cysteine-rich type 1 protein M130
Q86VZ4	LRP11	Low-density lipoprotein receptor-related protein 11
Q8IW75	SERPINA12	Serpin A12
Q8IZP9	ADGRG2	Adhesion G-protein coupled receptor G2
Q8N1Q1	CA13	Carbonic anhydrase 13
Q8N423	LILRB2	Leukocyte immunoglobulin-like receptor subfamily B member 2
Q8NBP7	PCSK9	Proprotein convertase subtilisin/kexin type 9
Q8NC01	CLEC1A	C-type lectin domain family 1 member A
Q8NHL6	LILRB1	Leukocyte immunoglobulin-like receptor subfamily B member 1
Q8NHS0	DNAJB8	DnaJ homolog subfamily B member 8
Q8NI22	MCFD2	Multiple coagulation factor deficiency protein 2
Q8TDL5	BPIFB1	BPI fold-containing family B member 1
Q8TE57	ADAMTS16	A disintegrin and metalloproteinase with thrombospondin motifs 16
Q8WTU2	SSC4D	Scavenger receptor cysteine-rich domain-containing group B protein
Q8WVQ1	CANT1	Soluble calcium-activated nucleotidase 1
Q8WX77	IGFBPL1	Insulin-like growth factor-binding protein-like 1
Q92520	FAM3C	Protein FAM3C
Q92558	WASF1	Actin-binding protein WASF1
Q92692	NECTIN2	Nectin-2
Q92820	GGH	Gamma-glutamyl hydrolase
Q92823	NRCAM	Neuronal cell adhesion molecule
Q969D9	TSLP	Thymic stromal lymphopoietin
Q969P0	IGSF8	Immunoglobulin superfamily member 8
Q96A56	TP53INP1	Tumor protein p53-inducible nuclear protein 1
Q96AP7	ESAM	Endothelial cell-selective adhesion molecule
Q96H15	TIMD4	T-cell immunoglobulin and mucin domain-containing protein 4
Q96KN2	CNDP1	Beta-Ala-His dipeptidase
Q96LA6	FCRL1	Fc receptor-like protein 1
Q96N03	VSTM2L	V-set and transmembrane domain-containing protein 2-like protein
Q99523	SORT1	Sortilin
Q99549	MPHOSPH8	M-phase phosphoprotein 8
Q99650	OSMR	Oncostatin-M-specific receptor subunit beta
Q99674	CGREF1	Cell growth regulator with EF hand domain protein 1
Q99969	RARRES2	Retinoic acid receptor responder protein 2
Q99988	GDF15	Growth/differentiation factor 15
Q9BQB4	SOST	Sclerostin
Q9BQR3	PRSS27	Serine protease 27
Q9BUD6	SPON2	Spondin-2
Q9BWV1	BOC	Brother of CDO
Q9BXJ1	C1QTNF1	Complement C1q tumor necrosis factor-related protein 1
Q9BYF1	ACE2	Angiotensin-converting enzyme 2
Q9GZM7	TINAGL1	Tubulointerstitial nephritis antigen-like
Q9H1U4	MEGF9	Multiple epidermal growth factor-like domains protein 9
Q9H2A7	CXCL16	C-X-C motif chemokine 16
Q9H5Y7	SLITRK6	SLIT and NTRK-like protein 6
Q9H773	DCTPP1	dCTP pyrophosphatase 1
Q9H7M9	VSIR	V-type immunoglobulin domain-containing suppressor of T-cell activation
Q9HBB8	CDHR5	Cadherin-related family member 5
Q9HD89	RETN	Resistin
Q9NNX6	CD209	CD209 antigen
Q9NPY3	CD93	Complement component C1q receptor
Q9NQ79	CRTAC1	Cartilage acidic protein 1
Q9NQX5	NPDC1	Neural proliferation differentiation and control protein 1
Q9NR28	DIABLO	Diablo IAP-binding mitochondrial protein
Q9NRD8	DUOX2	Dual oxidase 2
Q9NRV9	HEBP1	Heme-binding protein 1
Q9NWQ8	PAG1	Phosphoprotein associated with glycosphingolipid-enriched microdomains 1
Q9NY25	CLEC5A	C-type lectin domain family 5 member A
Q9NZK5	ADA2	Adenosine deaminase 2
Q9UBP4	DKK3	Dickkopf-related protein 3
Q9UBR2	CTSZ	Cathepsin Z
Q9UBU3	GHRL	Appetite-regulating hormone
Q9UEW3	MARCO	Macrophage receptor MARCO
Q9UGM5	FETUB	Fetuin-B
Q9UHD0	IL19	Interleukin-19
Q9UHL4	DPP7	Dipeptidyl peptidase 2
Q9UK05	GDF2	Growth/differentiation factor 2
Q9UKJ0	PILRB	Paired immunoglobulin-like type 2 receptor beta
Q9UKL0	RCOR1	REST corepressor 1
Q9UKP3	ITGB1BP2	Integrin beta-1-binding protein 2
Q9ULL4	PLXNB3	Plexin-B3
Q9UM47	NOTCH3	Neurogenic locus notch homolog protein 3
Q9UMF0	ICAM5	Intercellular adhesion molecule 5
Q9Y275	TNFSF13B	Tumor necrosis factor ligand superfamily member 13B
Q9Y286	SIGLEC7	Sialic acid-binding Ig-like lectin 7
Q9Y2B0	CNPY2	Protein canopy homolog 2
Q9Y4L1	HYOU1	Hypoxia up-regulated protein 1
Q9Y4X3	CCL27	C-C motif chemokine 27
Q9Y5C1	ANGPTL3	Angiopoietin-related protein 3
Q9Y5K6	CD2AP	CD2-associated protein
Q9Y5X1	SNX9	Sorting nexin-9
NT-proBNP	NT-proBNP	N-terminal prohormone of brain natriuretic peptide
