# Supplementary figures and images for: Examination of the Complex Molecular Landscape in Obesity and Type 2 Diabetes
Source: MDPI journal article supplement (doi:10.3390/ijms25094781), 2024-04-27

# Supplementary Figure 2

A

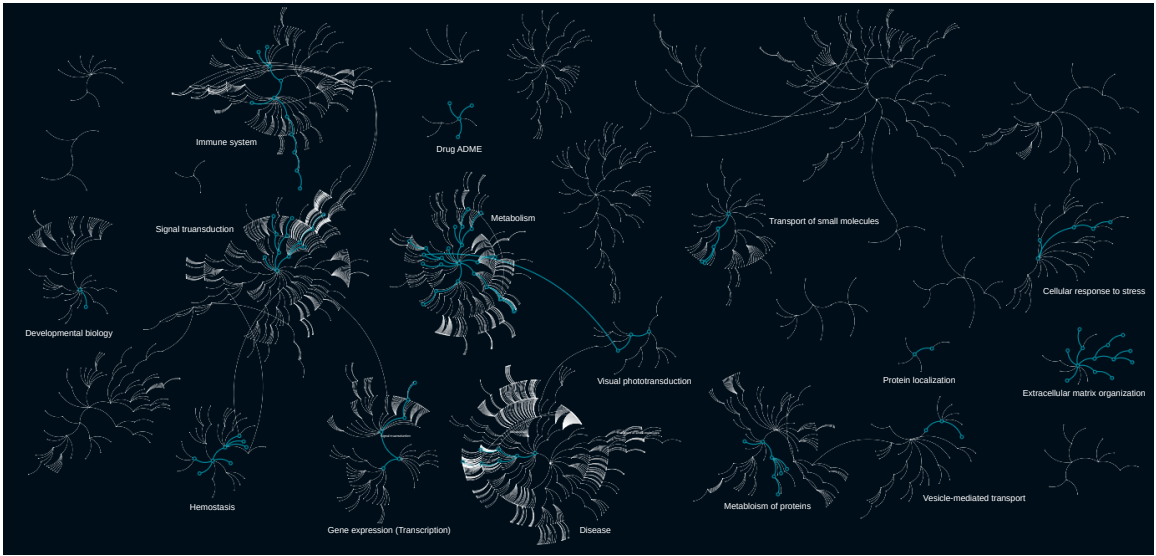

B

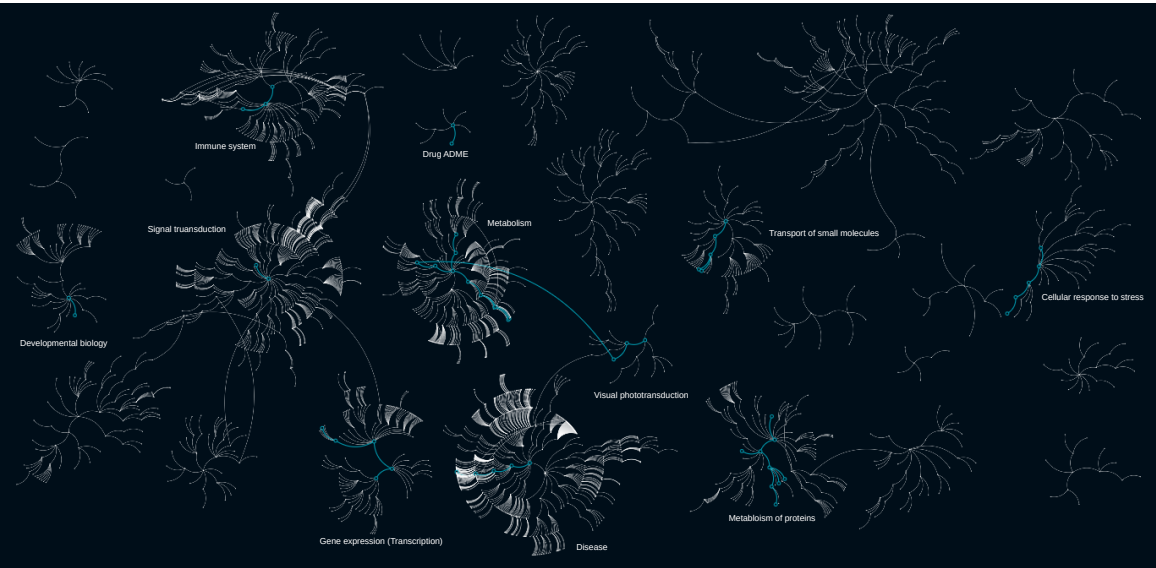

C

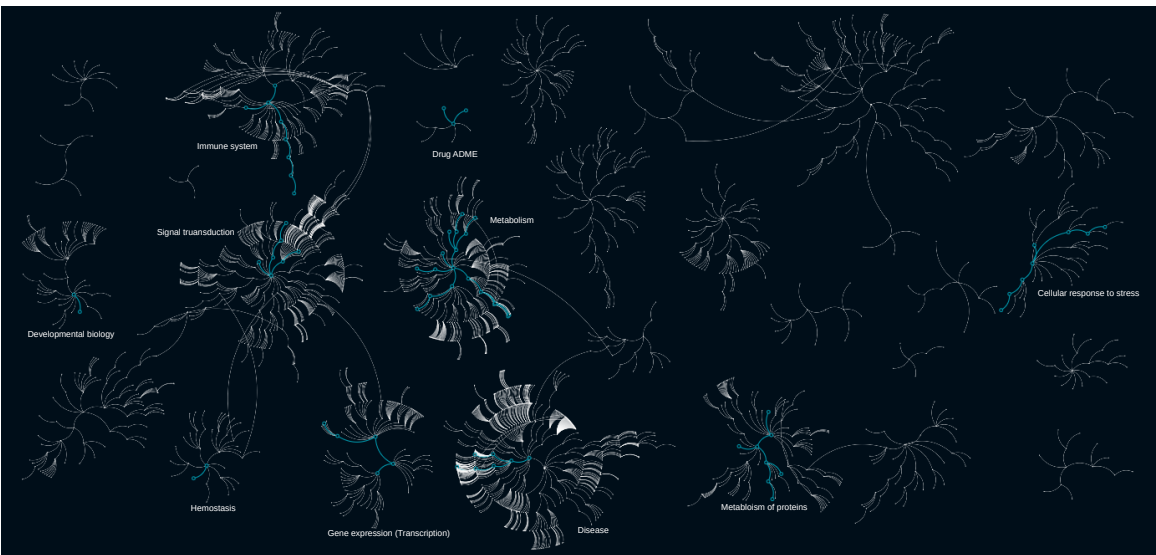

Supplement: s1 [file s1]
